# Supplementary material for: The Effect of Age, Parity and Body Mass Index on the Efficacy, Safety, Placement and User Satisfaction Associated With Two Low-Dose Levonorgestrel Intrauterine Contraceptive Systems: Subgroup Analyses of Data From a Phase III Trial
Source: PubMed Central journal article supplement (PMC4574776; doi:10.1371/journal.pone.0135309), 2015-09-17
Supplement: pone.0135309.s002.pdf [file pone.0135309.s002.pdf]

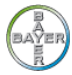

## 14. Tables and figures referred to but not included in the text

### Table of contents

|                                                                               |     |
|-------------------------------------------------------------------------------|-----|
| 14. Tables and figures referred to but not included in the text .....         | 1   |
| 14.1 Demographics .....                                                       | 2   |
| 14.1.1 Disposition and baseline characteristics .....                         | 3   |
| 14.1.2 Study drug administration and compliance.....                          | 145 |
| 14.1.3 Exposure .....                                                         | 205 |
| 14.2 Efficacy .....                                                           | 207 |
| 14.2.1 Contraceptive efficacy .....                                           | 208 |
| 14.2.2 Bleeding pattern (not included) .....                                  | 276 |
| 14.2.3 Other efficacy variables .....                                         | 277 |
| 14.3 Safety .....                                                             | 280 |
| 14.3.1 Analyses of adverse events .....                                       | 281 |
| 14.3.2 Listings of deaths, other serious and significant adverse events ..... | 784 |
| 14.3.3 Pregnancies (see efficacy).....                                        | 823 |

## **14.1 Demographics**

### **14.1.1 Disposition and baseline characteristics**

**Table 14.1.1 / 2: Subject validity and primary reasons for exclusion from analysis (all subjects randomized)**

|                               | LCS12         | LCS16         | Total         |
|-------------------------------|---------------|---------------|---------------|
| Subjects randomized           | 1432 (100.0%) | 1453 (100.0%) | 2885 (100.0%) |
| Subjects valid for FAS        | 1432 (100.0%) | 1452 (>99.9%) | 2884 (>99.9%) |
| Subjects enrolled to subset 1 | 20 ( 1.4%)    | 19 ( 1.3%)    | 39 ( 1.4%)    |
| Subjects enrolled to subset 2 | 31 ( 2.2%)    | 30 ( 2.1%)    | 61 ( 2.1%)    |
| Subjects enrolled to subset 3 | 12 ( 0.8%)    | 11 ( 0.8%)    | 23 ( 0.8%)    |
| Subjects valid for PKS        | 7 ( 0.5%)     | 6 ( 0.4%)     | 13 ( 0.5%)    |
| Subjects enrolled to subset 4 | 102 ( 7.1%)   | 103 ( 7.1%)   | 205 ( 7.1%)   |
| Excluded from FAS             | 0             | 1 (<0.1%)     | 1 (<0.1%)     |
| No insertion attempts         | 0             | 1 (<0.1%)     | 1 (<0.1%)     |
| Excluded from PKS             | 5 ( 0.3%)     | 5 ( 0.3%)     | 10 ( 0.3%)    |
| no 3 year sample              | 4 ( 0.3%)     | 5 ( 0.3%)     | 9 ( 0.3%)     |
| no sample around Tmax         | 1 (<0.1%)     | 0             | 1 (<0.1%)     |

Note: FAS = full analysis set, PKS = pharmacokinetic analysis set

Global Biostatistics: /by-sasp/patdb/projects/de04209/310442/stat/prod\_interim03/pgms/t-ds2.sas epkl 07OCT2011 10:47

End of table

**Table 14.1.1 / 3: Disposition: End of screening (all screened subjects)**

|                                          | Total (N=3661) |
|------------------------------------------|----------------|
| Screened                                 | 3661 (100.0%)  |
| Ongoing                                  | 2885 ( 78.8%)  |
| prem. discontinued                       | 776 ( 21.2%)   |
| Premature termination                    | 776 ( 21.2%)   |
| Primary reason                           |                |
| withdrawal of consent                    | 164 ( 4.5%)    |
| in-/ exclusion criteria not met          | 401 ( 11.0%)   |
| pat. lost, no further information avail. | 85 ( 2.3%)     |
| pregnancy                                | 44 ( 1.2%)     |
| other                                    | 82 ( 2.2%)     |

Global Biostatistics: /by-sasp/patdb/projects/de04209/310442/stat/prod\_interim03/pgms/t-ds3-1.sas epkl 07OCT2011 10:47  
 End of table

**Table 14.1.1 / 4: Disposition: End of study (all randomized subjects)**

|                                          | LCS12 (N=1432) | LCS16 (N=1453) | Total (N=2885) |
|------------------------------------------|----------------|----------------|----------------|
| Randomized                               | 1432 (100.0%)  | 1453 (100.0%)  | 2885 (100.0%)  |
| Ongoing to extension study               | 0              | 707 ( 48.7%)   | 707 ( 24.5%)   |
| Completed                                | 819 ( 57.2%)   | 163 ( 11.2%)   | 982 ( 34.0%)   |
| prem. discontinued                       | 613 ( 42.8%)   | 583 ( 40.1%)   | 1196 ( 41.5%)  |
| Premature termination                    | 613 ( 42.8%)   | 583 ( 40.1%)   | 1196 ( 41.5%)  |
| Primary reason                           |                |                |                |
| adverse event                            | 311 ( 21.7%)   | 277 ( 19.1%)   | 588 ( 20.4%)   |
| death                                    | 0              | 1 ( <0.1%)     | 1 ( <0.1%)     |
| other                                    | 189 ( 13.2%)   | 188 ( 12.9%)   | 377 ( 13.1%)   |
| pat. lost, no further information avail. | 63 ( 4.4%)     | 61 ( 4.2%)     | 124 ( 4.3%)    |
| pregnancy                                | 9 ( 0.6%)      | 10 ( 0.7%)     | 19 ( 0.7%)     |
| protocol deviation                       | 16 ( 1.1%)     | 15 ( 1.0%)     | 31 ( 1.1%)     |
| withdrawal of consent                    | 25 ( 1.7%)     | 31 ( 2.1%)     | 56 ( 1.9%)     |

Global Biostatistics: /by-sasp/patdb/projects/de04209/310442/stat/prod\_interim03/pgms/t-ds3-1.sas epkll 07OCT2011 10:47

End of table

**Table 14.1.1 / 5: Number of subjects who prematurely discontinued the study medication (including main reason) after randomization by treatment and year (all randomized subjects)**

| YEAR AFTER INSERTION: 1st year           |                |                |                |
|------------------------------------------|----------------|----------------|----------------|
|                                          | LCS12 (N=1432) | LCS16 (N=1453) | Total (N=2885) |
| Study medication, administration status  |                |                |                |
| n                                        | 1432 (100.0%)  | 1453 (100.0%)  | 2885 (100.0%)  |
| study medication never administered      | 0              | 2 ( 0.1%)      | 2 ( <0.1%)     |
| completed                                | 0              | 0              | 0              |
| prematurely discontinued                 | 266 ( 18.6%)   | 245 ( 16.9%)   | 511 ( 17.7%)   |
| ongoing                                  | 1166 ( 81.4%)  | 1206 ( 83.0%)  | 2372 ( 82.2%)  |
| missing                                  | 0              | 0              | 0              |
| Premature EOSM or never taken, reason    |                |                |                |
| n                                        | 266 (100.0%)   | 247 (100.0%)   | 513 (100.0%)   |
| withdrawal of consent                    | 11 ( 4.1%)     | 9 ( 3.6%)      | 20 ( 3.9%)     |
| protocol deviation                       | 3 ( 1.1%)      | 0              | 3 ( 0.6%)      |
| adverse event                            | 175 ( 65.8%)   | 168 ( 68.0%)   | 343 ( 66.9%)   |
| death                                    | 0              | 0              | 0              |
| pat. lost, no further information avail. | 25 ( 9.4%)     | 21 ( 8.5%)     | 46 ( 9.0%)     |
| pregnancy                                | 5 ( 1.9%)      | 2 ( 0.8%)      | 7 ( 1.4%)      |
| other                                    | 47 ( 17.7%)    | 47 ( 19.0%)    | 94 ( 18.3%)    |

Note: Year is calculated using the formula year = (last day on study (imputed)- insertion date)/365

Global Biostatistics: /by-sasp/patdb/projects/de04209/310442/stat/prod\_interim03/pgms/t-ds3-2.sas epkl1 07OCT2011 10:47

Table 14.1.1 / 5: Number of subjects who prematurely discontinued the study medication (including main reason) after randomization by treatment and year (all randomized subjects) (cont.)

| YEAR AFTER INSERTION: 2nd year           |                |                |                |
|------------------------------------------|----------------|----------------|----------------|
|                                          | LCS12 (N=1432) | LCS16 (N=1453) | Total (N=2885) |
| Study medication, administration status  |                |                |                |
| n                                        | 1166 (100.0%)  | 1206 (100.0%)  | 2372 (100.0%)  |
| study medication never administered      | 0              | 0              | 0              |
| completed                                | 0              | 0              | 0              |
| prematurely discontinued                 | 203 ( 17.4%)   | 194 ( 16.1%)   | 397 ( 16.7%)   |
| ongoing                                  | 963 ( 82.6%)   | 1012 ( 83.9%)  | 1975 ( 83.3%)  |
| missing                                  | 0              | 0              | 0              |
| Premature EOSM or never taken, reason    |                |                |                |
| n                                        | 203 (100.0%)   | 194 (100.0%)   | 397 (100.0%)   |
| withdrawal of consent                    | 9 ( 4.4%)      | 14 ( 7.2%)     | 23 ( 5.8%)     |
| protocol deviation                       | 5 ( 2.5%)      | 8 ( 4.1%)      | 13 ( 3.3%)     |
| adverse event                            | 85 ( 41.9%)    | 66 ( 34.0%)    | 151 ( 38.0%)   |
| death                                    | 0              | 0              | 0              |
| pat. lost, no further information avail. | 23 ( 11.3%)    | 21 ( 10.8%)    | 44 ( 11.1%)    |
| pregnancy                                | 3 ( 1.5%)      | 3 ( 1.5%)      | 6 ( 1.5%)      |
| other                                    | 78 ( 38.4%)    | 82 ( 42.3%)    | 160 ( 40.3%)   |

Note: Year is calculated using the formula year = (last day on study (imputed)- insertion date)/365

Global Biostatistics: /by-sasp/patdb/projects/de04209/310442/stat/prod\_interim03/pgms/t-ds3-2.sas epkl1 07OCT2011 10:47



Table 14.1.1 / 5: Number of subjects who prematurely discontinued the study medication (including main reason) after randomization by treatment and year (all randomized subjects) (cont.)

| YEAR AFTER INSERTION: 3rd year           |                |                |                |
|------------------------------------------|----------------|----------------|----------------|
|                                          | LCS12 (N=1432) | LCS16 (N=1453) | Total (N=2885) |
| Study medication, administration status  |                |                |                |
| n                                        | 963 (100.0%)   | 1012 (100.0%)  | 1975 (100.0%)  |
| study medication never administered      | 0              | 0              | 0              |
| completed                                | 819 ( 85.0%)   | 163 ( 16.1%)   | 982 ( 49.7%)   |
| prematurely discontinued                 | 143 ( 14.8%)   | 142 ( 14.0%)   | 285 ( 14.4%)   |
| ongoing                                  | 0              | 707 ( 69.9%)   | 707 ( 35.8%)   |
| missing                                  | 1 ( 0.1%)      | 0              | 1 (<0.1%)      |
| Premature EOSM or never taken, reason    |                |                |                |
| n                                        | 144 (100.0%)   | 142 (100.0%)   | 286 (100.0%)   |
| withdrawal of consent                    | 6 ( 4.2%)      | 8 ( 5.6%)      | 14 ( 4.9%)     |
| protocol deviation                       | 8 ( 5.6%)      | 8 ( 5.6%)      | 16 ( 5.6%)     |
| adverse event                            | 53 ( 36.8%)    | 44 ( 31.0%)    | 97 ( 33.9%)    |
| death                                    | 0              | 1 ( 0.7%)      | 1 ( 0.3%)      |
| pat. lost, no further information avail. | 15 ( 10.4%)    | 19 ( 13.4%)    | 34 ( 11.9%)    |
| pregnancy                                | 1 ( 0.7%)      | 5 ( 3.5%)      | 6 ( 2.1%)      |
| other                                    | 61 ( 42.4%)    | 57 ( 40.1%)    | 118 ( 41.3%)   |

Note: Year is calculated using the formula year = (last day on study (imputed)- insertion date)/365

Global Biostatistics: /by-sasp/patdb/projects/de04209/310442/stat/prod\_interim03/pgms/t-ds3-2.sas epkl1 07OCT2011 10:47

Table 14.1.1 / 5: Number of subjects who prematurely discontinued the study medication (including main reason) after randomization by treatment and year (all randomized subjects) (cont.)

| YEAR AFTER INSERTION: Overall            |                |                |                |
|------------------------------------------|----------------|----------------|----------------|
|                                          | LCS12 (N=1432) | LCS16 (N=1453) | Total (N=2885) |
| Study medication, administration status  |                |                |                |
| n                                        | 1432 (100.0%)  | 1453 (100.0%)  | 2885 (100.0%)  |
| study medication never administered      | 0              | 2 ( 0.1%)      | 2 (<0.1%)      |
| completed                                | 819 ( 57.2%)   | 163 ( 11.2%)   | 982 ( 34.0%)   |
| prematurely discontinued                 | 612 ( 42.7%)   | 581 ( 40.0%)   | 1193 ( 41.4%)  |
| ongoing                                  | 0              | 707 ( 48.7%)   | 707 ( 24.5%)   |
| missing                                  | 1 (<0.1%)      | 0              | 1 (<0.1%)      |
| Premature EOSM or never taken, reason    |                |                |                |
| n                                        | 613 (100.0%)   | 583 (100.0%)   | 1196 (100.0%)  |
| withdrawal of consent                    | 26 ( 4.2%)     | 31 ( 5.3%)     | 57 ( 4.8%)     |
| protocol deviation                       | 16 ( 2.6%)     | 16 ( 2.7%)     | 32 ( 2.7%)     |
| adverse event                            | 313 ( 51.1%)   | 278 ( 47.7%)   | 591 ( 49.4%)   |
| death                                    | 0              | 1 ( 0.2%)      | 1 (<0.1%)      |
| pat. lost, no further information avail. | 63 ( 10.3%)    | 61 ( 10.5%)    | 124 ( 10.4%)   |
| pregnancy                                | 9 ( 1.5%)      | 10 ( 1.7%)     | 19 ( 1.6%)     |
| other                                    | 186 ( 30.3%)   | 186 ( 31.9%)   | 372 ( 31.1%)   |

Note: Year is calculated using the formula year = (last day on study (imputed)- insertion date)/365

Global Biostatistics: /by-sasp/patdb/projects/de04209/310442/stat/prod\_interim03/pgms/t-ds3-2.sas epkll 07OCT2011 10:47

End of table

**Table 14.1.1 / 6: Listing of subjects who prematurely discontinued study medication with reason 'other' by treatment (all randomized subjects)**

TREATMENT: LCS12

| Subject number | Premature EOSM or never taken, reason | Premature EOSM other reason                                                                   |
|----------------|---------------------------------------|-----------------------------------------------------------------------------------------------|
| 120109         | other                                 | WISH OF PREGNANCY                                                                             |
| 120212         | other                                 | WISH OF PREGNANCY.                                                                            |
| 120403         | other                                 | THE PATIENT WILL TRAVELED TO OTHER COUNTRY                                                    |
| 120409         | other                                 | WISH FOR PREGNANCY                                                                            |
| 120412         | other                                 | WISH OF PREGNANCY                                                                             |
| 120414         | other                                 | WISH FOR PREGNANCY                                                                            |
| 120608         | other                                 | WISH TO BE PREGNANT.                                                                          |
| 140212         | other                                 | WISH FOR PREGNANCY                                                                            |
| 140501         | other                                 | INSERTION FAILURE                                                                             |
| 140701         | other                                 | PT. NON - COMPLIANT WITH DIARIES                                                              |
| 140711         | other                                 | PT DID NOT WANT IUD ANYMORE.                                                                  |
| 140921         | other                                 | WANTS TO GET PREGNANT.                                                                        |
| 141017         | other                                 | 'WISH FOR PREGNANCY'                                                                          |
| 141201         | other                                 | PARTNER UNCOMFORTABLE/SAME-SEX RELATIONSHIP, LAST HETEROSEXUAL RELATIONSHIP ENDED 31/OCT/2009 |
| 141301         | other                                 | NO LONGER NEEDS CONTRACEPTION                                                                 |
| 150106         | other                                 | WISH OF PREGNANCY                                                                             |
| 150110         | other                                 | DESIRE TO BECOME PREGNANT                                                                     |
| 150156         | other                                 | SHE WILL MOVE OUT OF THE COUNTRY FOR TWO YEARS.                                               |
| 150506         | other                                 | IUS WAS ACCIDENTALY REMOVED IN OTHER CLINIC CENTRE                                            |
| 160208         | other                                 | HOPE TO GET PREGNANT                                                                          |
| 160306         | other                                 | NO SEXUAL RELATION                                                                            |
| 160321         | other                                 | WISH OF PREGNANCY                                                                             |
| 160431         | other                                 | WISH TO GET PREGNANT                                                                          |
| 160514         | other                                 | WISH TO HAVE A BABY                                                                           |
| 160524         | other                                 | WISH TO HAVE A BABY                                                                           |
| 160550         | other                                 | NO NEED TO CONTRACEPTION                                                                      |
| 160557         | other                                 | WANT TO BE PREGNANT                                                                           |
| 160564         | other                                 | WANTS PREGNANCY                                                                               |
| 160566         | other                                 | SHE IS LIVING IN INDIA AND IS COMING TO FINLAND IN SUMMER 2011                                |
| 160567         | other                                 | FEAR FOR HORMONES                                                                             |
| 160573         | other                                 | WANTS PREGNANCY                                                                               |
| 160574         | other                                 | GOING ABROAD (AUSTRALIA) FOR ONE YEAR.                                                        |
| 160704         | other                                 | WISH TO BE PREGNANT                                                                           |
| 160721         | other                                 | WANTS TO GET PREGNANT                                                                         |
| 160725         | other                                 | WISH FOR PREGNANCY                                                                            |
| 160736         | other                                 | WANTS TO GET PREGNANT                                                                         |
| 160801         | other                                 | WISH OF PREGNANCY                                                                             |
| 160904         | other                                 | WISH FOR PREGNANCY                                                                            |
| 160982         | other                                 | WISH FOR PREGNANCY                                                                            |
| 161003         | other                                 | MOVING ABROAD                                                                                 |
| 161106         | other                                 | WISH FOR PREGNANCY                                                                            |
| 161110         | other                                 | WISH FOR PREGNANCY                                                                            |

**Table 14.1.1 / 6: Listing of subjects who prematurely discontinued study medication with reason 'other' by treatment (all randomized subjects)**

TREATMENT: LCS12

| Subject number | Premature EOSM or never taken, reason | Premature EOSM other reason                            |
|----------------|---------------------------------------|--------------------------------------------------------|
| 161112         | other                                 | EMIGRATE TO USA                                        |
| 161210         | other                                 | LCS ACCIDENTALLY REMOVED                               |
| 161407         | other                                 | WISH FOR PREGNANCY                                     |
| 161435         | other                                 | WISH FOR PREGNANCY                                     |
| 161437         | other                                 | WISH TO GET PREGNANT                                   |
| 161511         | other                                 | WISH OF PREGNANCY                                      |
| 161514         | other                                 | PREGNANCY WISH                                         |
| 170101         | other                                 | WISHES FOR PREGNANCY                                   |
| 170302         | other                                 | WISHES FOR PREGNANCY                                   |
| 170410         | other                                 | WISH OF PREGNANCY                                      |
| 170414         | other                                 | WISH OF PREGNANCY                                      |
| 170801         | other                                 | WISHES FOR PREGNANCY                                   |
| 180307         | other                                 | WISH OF PREGNANCY                                      |
| 180617         | other                                 | WISH OF PREGNANCY                                      |
| 180658         | other                                 | WISH FOR PREGNANCY                                     |
| 180662         | other                                 | PREGNANCY WISH                                         |
| 180813         | other                                 | WISH OF PREGNANCY                                      |
| 190110         | other                                 | PATIENT WANTS TO GET PREGNANT                          |
| 190411         | other                                 | SHE WANTS TO GET PREGNANT                              |
| 190412         | other                                 | THE PATIENT WISHES TO GET PREGNANT.                    |
| 190602         | other                                 | THE PATIENT WANTS TO GET PREGNANT.                     |
| 200104         | other                                 | UNSATISFIED WITH CYCLIC BLEEDINGS                      |
| 200106         | other                                 | FUTURE WISH PREGNANCY STARTING FROM AUG'09             |
| 200201         | other                                 | WANTS TO BE PREGNANT                                   |
| 200205         | other                                 | WISHES TO BE PREGNANT.                                 |
| 200303         | other                                 | WISH FOR PREGNANCY                                     |
| 200309         | other                                 | WANTS TO GET PREGNANT                                  |
| 200501         | other                                 | PREGNANCY WISH                                         |
| 200503         | other                                 | PREGNANCY WISH                                         |
| 200612         | other                                 | WISH FOR PREGNANCY.                                    |
| 200614         | other                                 | WANTS A BABY                                           |
| 200629         | other                                 | WISH FOR PREGNANCY.                                    |
| 200634         | other                                 | WANTS TO BECOME PREGNANT.                              |
| 200803         | other                                 | MOVING TO OTHER COUNTRY                                |
| 200804         | other                                 | WISH FOR CHILDREN                                      |
| 200904         | other                                 | EMIGRATION                                             |
| 200910         | other                                 | WISH FOR PREGNANCY                                     |
| 210125         | other                                 | PREGNANCY WISH                                         |
| 210127         | other                                 | SHE WANTS TO GET PREGNANT                              |
| 210211         | other                                 | THE PATIENT WANTS / WISHES PREGNANCY                   |
| 210404         | other                                 | MOVED TO NORTHERN NORWAY (1000KM. NORTH OF STUDY PLACE |
| 210409         | other                                 | PREGNANCY WISH                                         |
| 210514         | other                                 | SHE WANT TO BE PREGNANT                                |

**Table 14.1.1 / 6: Listing of subjects who prematurely discontinued study medication with reason 'other' by treatment (all randomized subjects)**

TREATMENT: LCS12

| Subject number | Premature EOSM or never taken, reason | Premature EOSM other reason                                                 |
|----------------|---------------------------------------|-----------------------------------------------------------------------------|
| 230103         | other                                 | WISH PREGNANCY                                                              |
| 230107         | other                                 | WISH FOR PREGNANCY                                                          |
| 230115         | other                                 | BREAST CANCER EVENT WITHIN HER FAMILY                                       |
| 230208         | other                                 | WISH FOR PREGNANCY                                                          |
| 230304         | other                                 | WISH TO GET PREGNANT                                                        |
| 230401         | other                                 | PLANNING PREGNANCY                                                          |
| 230408         | other                                 | PLANNING PREGNANCY                                                          |
| 230512         | other                                 | WISH TO BECOME PREGNANT                                                     |
| 230824         | other                                 | WISH OF PREGNANCY.                                                          |
| 231112         | other                                 | NO SEXUAL ACTIVITY, NO PARTNER                                              |
| 240205         | other                                 | RELOCATION                                                                  |
| 240227         | other                                 | PATIENT NO LONGER WANTED IUS                                                |
| 240302         | other                                 | DESIRE TO BECOME PREGNANT                                                   |
| 240310         | other                                 | DESIRE TO GET PREGNANT                                                      |
| 240316         | other                                 | MOVE OUT OF STATE                                                           |
| 240503         | other                                 | SUBJECT MOVING OUT OF AREA.                                                 |
| 240505         | other                                 | DESIRES TO BECOME PREGNANT IN 4 TO 5 MONTHS                                 |
| 240521         | other                                 | SUBJECT REQUEST DUE TO UPCOMING MAJOR SURGERY (COLECTOMY)                   |
| 240712         | other                                 | DESIRES PREGNANCY                                                           |
| 240721         | other                                 | SUBJECT TO HAVE ESSURE AND NOVASURE PROCEDURES                              |
| 240820         | other                                 | PATIENT MOVING                                                              |
| 240838         | other                                 | MOVING                                                                      |
| 241011         | other                                 | WISH FOR PREGNANCY                                                          |
| 241014         | other                                 | PARTNER COULD FEEL STRING                                                   |
| 241018         | other                                 | FAILED IUD INSERTION. NO SECOND ATTEMPT.                                    |
| 241019         | other                                 | DESIRES TO CONCEIVE                                                         |
| 241024         | other                                 | INTERNAL OS STENOTIC, COULD NOT PASS SOUND, TRIED TO DILATE WITHOUT SUCCESS |
| 241033         | other                                 | PARTNER BOTHERED BY STRINGS.                                                |
| 241105         | other                                 | WISH FOR PREGNANCY                                                          |
| 241108         | other                                 | DESIRES TO CONCEIVE                                                         |
| 241110         | other                                 | WANTS TO CONCEIVE                                                           |
| 241115         | other                                 | FAILED INSERTION                                                            |
| 241120         | other                                 | WISH FOR PREGNANCY                                                          |
| 241148         | other                                 | WISH FOR PREGNANCY                                                          |
| 241162         | other                                 | WISH FOR PREGNANCY                                                          |
| 241167         | other                                 | WISH FOR PREGNANCY                                                          |
| 241174         | other                                 | MOVING OUT OF STATE & HUSBAND HAVING VASECTOMY.                             |
| 241175         | other                                 | "WISH FOR PREGNANCY"                                                        |
| 241190         | other                                 | MOVING OUT OF AREA                                                          |
| 241193         | other                                 | SEEKING PREGNANCY                                                           |
| 241202         | other                                 | SUBJECT WANTS TO TRY A DIFFERENT BIRTH CONTROL                              |
| 241209         | other                                 | MOVING OUT OF THE COUNTRY.                                                  |
| 241210         | other                                 | PREGNANCY WISH                                                              |

**Table 14.1.1 / 6: Listing of subjects who prematurely discontinued study medication with reason 'other' by treatment (all randomized subjects)**

TREATMENT: LCS12

| Subject number | Premature EOSM or never taken, reason | Premature EOSM other reason                                                   |
|----------------|---------------------------------------|-------------------------------------------------------------------------------|
| 241231         | other                                 | MOVING                                                                        |
| 241307         | other                                 | WISH FOR PREGNANCY                                                            |
| 241405         | other                                 | PT. STATES STRINGS BOTHER HER PARTNER                                         |
| 241406         | other                                 | PT. HUSBAND HAD VASECTOMY.                                                    |
| 241416         | other                                 | PATIENT DESIRES PREGNANCY                                                     |
| 241428         | other                                 | IUS CAME OUT IMMEDIATELY AFTER INSERTION                                      |
| 241532         | other                                 | ACCIDENTALLY REMOVED WHEN CUTTING STRING                                      |
| 241541         | other                                 | RELOCATING                                                                    |
| 241545         | other                                 | PATIENT MOVING                                                                |
| 241547         | other                                 | IUD NOT ALLOWED IN MILITARY SUBJECT JOINING MILITARY                          |
| 241553         | other                                 | PLANNING FUTURE PREGNANCY                                                     |
| 241605         | other                                 | SUBJECT REQUESTING CONTRACEPTION WITHOUT HORMONES                             |
| 241805         | other                                 | SUBJECT NOT COMPLIANT WITH VISIT SCHEDULE                                     |
| 242203         | other                                 | PT WANTS TO GET PREGNANT                                                      |
| 242213         | other                                 | PT COULD NO LONGER PARTICIPATE DUE TO WORK SCHEDULE                           |
| 242708         | other                                 | SUBJECT MOVING OUT OF STATE                                                   |
| 242816         | other                                 | PREGNANCYWISH                                                                 |
| 242907         | other                                 | MOVING TO ANOTHER COUNTRY                                                     |
| 242910         | other                                 | MOVED AWAY                                                                    |
| 243005         | other                                 | DESIRES CONCEPTION                                                            |
| 243009         | other                                 | DESIRES PREGNANCY                                                             |
| 243106         | other                                 | IUS APPEARS TO BE TRANSVERSE LIE IN FUNDUS                                    |
| 243207         | other                                 | WISH FOR PREGNANCY                                                            |
| 243309         | other                                 | PATIENT MOVING OUT OF STATE                                                   |
| 243314         | other                                 | SUBJECT DESIRES PREGNANCY                                                     |
| 243322         | other                                 | SUBJECT DESIRES PREGNANCY                                                     |
| 243611         | other                                 | PATIENT MOVING OUT OF STATE                                                   |
| 243618         | other                                 | PT. WISHES TO BECOME PREGNANT                                                 |
| 243946         | other                                 | PATIENT IS MOVING TO FLORIDA AND WILL NOT RETURN WITHIN WINDOW TO GET IUD OUT |
| 243965         | other                                 | PATIENT IS HAVING A BILATERAL TUBAL LIGATION                                  |
| 243968         | other                                 | NON COMPLIANCE                                                                |
| 243973         | other                                 | HUSBAND FELT STRINGS OF IUD                                                   |
| 244008         | other                                 | INSERTION FAILURE                                                             |
| 244125         | other                                 | PATIENT MOVING OUT OF TOWN.                                                   |
| 244302         | other                                 | PT MOVED OUT OF STATE                                                         |
| 244306         | other                                 | SUBJECT MOVING OUT OF STATE                                                   |
| 244407         | other                                 | SUBJECT TRAVELLING OUT OF THE COUNTRY                                         |
| 244426         | other                                 | SUBJECTWANTING TO CONCEIVE                                                    |
| 244442         | other                                 | DESIRES PREGNANCY.                                                            |
| 244604         | other                                 | PT. DESIRES CONCEPTION                                                        |
| 244608         | other                                 | DESIRE TO CONCEIVE                                                            |
| 244610         | other                                 | PT STATED SHE DIDN'T WANT TO HAVE TO WORRY ABOUT IUD ANYMORE.                 |
| 245004         | other                                 | PT. MOVED OUT OF STATE                                                        |

**Table 14.1.1 / 6: Listing of subjects who prematurely discontinued study medication with reason 'other' by treatment (all randomized subjects)**

TREATMENT: LCS12

| Subject number | Premature EOSM or never taken, reason | Premature EOSM other reason            |
|----------------|---------------------------------------|----------------------------------------|
| 245007         | other                                 | DESIRE FOR PREGNANCY                   |
| 245021         | other                                 | BASELINE FINDING OF "VAGINAL BLEEDING" |
| 245022         | other                                 | DESIRE FOR PREGNANCY.                  |
| 245026         | other                                 | DESIRE FOR PREGNANCY                   |
| 245028         | other                                 | PT. MOVING OUT OF STATE                |
| 245032         | other                                 | DESIRE FOR PREGNANCY.                  |
| 245431         | other                                 | DESIRES CONCEPTION                     |
| 245439         | other                                 | DESIRES PREGNANCY                      |
| 245525         | other                                 | MOVING OUT OF STATE.                   |
| 245603         | other                                 | SUBJECT WISHES TO BECOME PREGNANT      |
| 245904         | other                                 | DESIRES PREGNANCY                      |
| 245910         | other                                 | DESIRES PREGNANCY                      |
| 246150         | other                                 | MOVING TO ANOTHER STATE                |
| 246210         | other                                 | DESIRES TO CONCEIVE                    |
| 246211         | other                                 | "WISH FOR PREGNANCY"                   |

Global Biostatistics: /by-sasp/patdb/projects/de04209/310442/stat/prod\_interim03/pgms/t-ds3-2.sas epkl 07OCT2011 10:47

Table 14.1.1 / 6: Listing of subjects who prematurely discontinued study medication with reason 'other' by treatment (all randomized subjects) (cont.)

TREATMENT: LCS16

| Subject number | Premature EOSM or never taken, reason | Premature EOSM other reason                                                                                      |
|----------------|---------------------------------------|------------------------------------------------------------------------------------------------------------------|
| 120334         | other                                 | WISH OF PREGNANCY                                                                                                |
| 120406         | other                                 | WISH OF PREGNANCY                                                                                                |
| 120408         | other                                 | WISH OF PREGNANCY                                                                                                |
| 120424         | other                                 | WISH OF PREGNANCY                                                                                                |
| 140120         | other                                 | DESIRE PREGNANCY                                                                                                 |
| 140211         | other                                 | DESIRE OF CHILD BEARING                                                                                          |
| 140603         | other                                 | MOVING ABROAD                                                                                                    |
| 140710         | other                                 | PT. WISHES TO GET PREGNANT                                                                                       |
| 140712         | other                                 | PT MOVING OUT OF PROVINCE                                                                                        |
| 140906         | other                                 | HUSBAND HAD VASECTOMY                                                                                            |
| 141002         | other                                 | WANTS TO BE PREGNANT.                                                                                            |
| 141012         | other                                 | PATIENT WISHES PREGNANCY.                                                                                        |
| 141202         | other                                 | SUBJECT PARTNER UNCOMFORTABLE WITH DEVICE.                                                                       |
| 150113         | other                                 | MOVING OUT OF THE CITY.                                                                                          |
| 150122         | other                                 | THE IUS WAS REMOVED BY HER GYNECOLOGIST ON APRIL 20, 2010 BECAUSE HER HUSBAND MADE A VASECTOMY ON MARCH 15, 2010 |
| 150147         | other                                 | INSERTION FAILURE (2) WAS NOT POSSIBLE TO PASS THROUGH CERVIX                                                    |
| 160115         | other                                 | WISH OF PREGNANCY                                                                                                |
| 160123         | other                                 | WANTS TO GET PREGNANT                                                                                            |
| 160204         | other                                 | UNABLE TO CONTINUE BECAUSE OF HER JOB                                                                            |
| 160211         | other                                 | HOPE TO GET PREGNANT                                                                                             |
| 160327         | other                                 | WISH OF PREGNANCY                                                                                                |
| 160330         | other                                 | WISH OF PREGNANCY                                                                                                |
| 160412         | other                                 | WANTS GET PREGNANT                                                                                               |
| 160429         | other                                 | WISH FOR PREGNANCY                                                                                               |
| 160435         | other                                 | WISH FOR PREGNANCY.                                                                                              |
| 160510         | other                                 | WANT TO HAVE A BABY                                                                                              |
| 160521         | other                                 | PREGNANCY WISH                                                                                                   |
| 160527         | other                                 | WANTS TO GET PREGNANT                                                                                            |
| 160530         | other                                 | WANTS PREGNANCY                                                                                                  |
| 160560         | other                                 | WANTS PREGNANCY                                                                                                  |
| 160620         | other                                 | WISH TO BECOME PREGNANT                                                                                          |
| 160707         | other                                 | WANTS TO GET PREGNANT                                                                                            |
| 160715         | other                                 | WANTS TO GET PREGNANT                                                                                            |
| 160808         | other                                 | PREGNANCY WISH                                                                                                   |
| 160915         | other                                 | WISH FOR PREGNANCY                                                                                               |
| 160941         | other                                 | HOPE FOR PREGNANCY                                                                                               |
| 160945         | other                                 | WISH FOR PREGNANCY                                                                                               |
| 161016         | other                                 | PREGNANCY IS DESIRED                                                                                             |
| 161022         | other                                 | WISH OF PREGNANCY                                                                                                |
| 161113         | other                                 | HOPE OF PREGNANCY                                                                                                |
| 161307         | other                                 | WISH OF PREGNANCY                                                                                                |
| 161412         | other                                 | WISH FOR PREGNANCY                                                                                               |



Table 14.1.1 / 6: Listing of subjects who prematurely discontinued study medication with reason 'other' by treatment (all randomized subjects) (cont.)

TREATMENT: LCS16

| Subject number | Premature EOSM or never taken, reason | Premature EOSM other reason                         |
|----------------|---------------------------------------|-----------------------------------------------------|
| 161427         | other                                 | WISH FOR PREGNANCY                                  |
| 161434         | other                                 | PATIENT MOVED AWAY                                  |
| 161507         | other                                 | WISH OF PREGNANCY                                   |
| 161528         | other                                 | PREGNANCY WISHES                                    |
| 161535         | other                                 | WISH OF PREGNANCY                                   |
| 170401         | other                                 | PREGNANCY WISH                                      |
| 170501         | other                                 | THE PATIENT WISHES FOR PREGNANCY NOW                |
| 170604         | other                                 | WISH OF PREGNANCY                                   |
| 180218         | other                                 | WISH OF PREGNANCY                                   |
| 180333         | other                                 | WISH OF PREGNANCY                                   |
| 180413         | other                                 | PLANNING OF PREGNANCY                               |
| 180526         | other                                 | WISH OF PREGNANCY                                   |
| 180639         | other                                 | WISH FOR PREGNANCY                                  |
| 180678         | other                                 | WANTS TO BE PREGNANT                                |
| 180688         | other                                 | PREGNANCY WISH                                      |
| 180802         | other                                 | PATIENT'S PARTNER FEELS DISCOMFORTABLE THREAD       |
| 180819         | other                                 | PATIENT WANT TO BE PREGNANT                         |
| 190102         | other                                 | SHE WENT TO LIVE IN ANOTHER CITY                    |
| 190113         | other                                 | SHE LIKES TO PREGNANT.                              |
| 190122         | other                                 | WISH FOR PREGNANCY                                  |
| 190127         | other                                 | WANTS TO GET PREGNANT                               |
| 190129         | other                                 | DESIRE OF PREGNANCY                                 |
| 190631         | other                                 | WISH TO GET PREGNANT                                |
| 200107         | other                                 | PREGNANCY WISH                                      |
| 200113         | other                                 | PREGNANCY WISH                                      |
| 200114         | other                                 | PREGNANCY WISH                                      |
| 200212         | other                                 | MOVEMENT ABROAD.                                    |
| 200218         | other                                 | WOULD LIKE TO GET PREGNANT                          |
| 200220         | other                                 | WHISH FOR PREGNANCY                                 |
| 200225         | other                                 | WISH TO BECOME PREGNANT                             |
| 200305         | other                                 | WISH FOR PREGNANCY                                  |
| 200407         | other                                 | WISH TO CONCEIVE.                                   |
| 200508         | other                                 | CHILD WISH                                          |
| 200622         | other                                 | WANTS TO BECOME PREGNANT.                           |
| 200907         | other                                 | WISH FOR PREGNANCY.                                 |
| 210204         | other                                 | THE WOMAN WISHES TO BE PREGNANT                     |
| 210523         | other                                 | PREGNANCY DESIRE                                    |
| 210604         | other                                 | IUD EXTRACTED ACCIDENTALLY DURING BIOPSY            |
| 230113         | other                                 | INSERTION FAILED                                    |
| 230118         | other                                 | PAT UNABLE TO DO SCHEDULED VISITS DUE TO TRAVELLING |
| 230306         | other                                 | WISH TO GET PREGNANT                                |
| 230404         | other                                 | PATIENT REQUEST IS MOVING TO NEW YORK               |
| 230407         | other                                 | INSERTION FAILURE                                   |

Table 14.1.1 / 6: Listing of subjects who prematurely discontinued study medication with reason 'other' by treatment (all randomized subjects) (cont.)

TREATMENT: LCS16

| Subject number | Premature EOSM or never taken, reason | Premature EOSM other reason                                |
|----------------|---------------------------------------|------------------------------------------------------------|
| 230601         | other                                 | PATIENT MOVED TO LONDON                                    |
| 230708         | other                                 | PREGNANCY WISH                                             |
| 230915         | other                                 | PATIENT WISHES TO PREGNANT                                 |
| 230916         | other                                 | NO NEED OF CONTRACEPTION                                   |
| 231015         | other                                 | PREGNANCY WISH                                             |
| 231021         | other                                 | WISH FOR PREGNANCY                                         |
| 231109         | other                                 | PATIENT WANTS TO GET PREGNANT.                             |
| 231110         | other                                 | WISH TO GET PREGNANT                                       |
| 240128         | other                                 | IUS STRING POKING PARTNER                                  |
| 240212         | other                                 | DESIRE FOR PREGNANCY                                       |
| 240343         | other                                 | DESIRE TO BECOME PREGNANT                                  |
| 240361         | other                                 | INSERTION FAILURE                                          |
| 240511         | other                                 | PI WILL NO LONGER BE PRACTICING.                           |
| 240522         | other                                 | DESIRES TO BECOME PREGNANT                                 |
| 240523         | other                                 | SUBJECT REQUEST DUE TO RECURRENT PAST LEFT OVARIAN CYSTS   |
| 240645         | other                                 | HUSBAND GETTING VASECTOMY                                  |
| 240717         | other                                 | SUBJECT IS GOING TO BE AN INVITRO EGG DONOR FOR HER SISTER |
| 240733         | other                                 | DYSPAREUNIA FOR PARTNER                                    |
| 240802         | other                                 | MOVED OUT OF STATE                                         |
| 240804         | other                                 | WISH FOR PREGNANCY                                         |
| 240807         | other                                 | SUBJECT UNABLE TO COMPLY WITH VISITS                       |
| 240819         | other                                 | DESIRES CONCEPTION                                         |
| 240821         | other                                 | PATIENT WANTS TO GET PREGNANT                              |
| 240830         | other                                 | PATIENT DESIRES CONCEPTION                                 |
| 240907         | other                                 | SUBJECT MOVING OUT OF STATE                                |
| 241022         | other                                 | WANTS TO BECOME PREGNANT                                   |
| 241030         | other                                 | SUBJECT HAD NO NEED FOR CONTRACEPTION                      |
| 241101         | other                                 | SUBJECT NO LONGER NEEDS CONTRACEPTION                      |
| 241103         | other                                 | SUBJECT WANTS TO CONCIEVE                                  |
| 241118         | other                                 | WISH FOR PREGNANCY                                         |
| 241121         | other                                 | SEEKING PREGNANCY                                          |
| 241134         | other                                 | WISH FOR PREGNANCY                                         |
| 241135         | other                                 | WANTS TO CONCEIVE                                          |
| 241155         | other                                 | DESIRES CONCEPTION                                         |
| 241157         | other                                 | WISH FOR PREGNANCY                                         |
| 241189         | other                                 | WISH FOR PREGNANCY                                         |
| 241196         | other                                 | WISHES TO CONCIEVE                                         |
| 241203         | other                                 | SUBJECT IS MOVING OUT OF THE COUNTRY                       |
| 241220         | other                                 | LOST TO FOLLOW UP                                          |
| 241235         | other                                 | SUBJECT TOO BUSY TO COMMIT TO WORK SCHEDULE                |
| 241243         | other                                 | SUBJECT MOVING                                             |
| 241422         | other                                 | SUBJECT MOVED OUT OF STATE                                 |
| 241511         | other                                 | WANT TO PLAN FOR PREGNANCY NEXT YEAR                       |

Table 14.1.1 / 6: Listing of subjects who prematurely discontinued study medication with reason 'other' by treatment (all randomized subjects) (cont.)

TREATMENT: LCS16

| Subject number | Premature EOSM or never taken, reason | Premature EOSM other reason                                                                              |
|----------------|---------------------------------------|----------------------------------------------------------------------------------------------------------|
| 241524         | other                                 | ALTERNATIVE CONTRACEPTION TUBAL LIGATION                                                                 |
| 241529         | other                                 | MOVED TO COSTA RICO UNABLE TO CONTINUE FOLLOW-UP VISIT                                                   |
| 241533         | other                                 | SUBJECT NO LONGER NEEDS CONTRACEPTION                                                                    |
| 241608         | other                                 | REMOVED BY PRIVATE PHYSICIAN DURING LOOP ELECTROSURGICAL EXCISION PROCEDURE                              |
| 241703         | other                                 | DESIRES PREGNANCY                                                                                        |
| 241705         | other                                 | SUBJECT IS RELOCATING TO CALIFORNIA.                                                                     |
| 241722         | other                                 | DESIRES PREGNANCY                                                                                        |
| 242225         | other                                 | PT. MOVING                                                                                               |
| 242314         | other                                 | PATIENT MOVED TO CONNECTICUT                                                                             |
| 242703         | other                                 | MARITAL STATUS                                                                                           |
| 242808         | other                                 | SUBJECT HAD LCS REMOVED BY PRIVATE PHYSICIAN                                                             |
| 242810         | other                                 | COULD NOT TRAVEL TO OFFICE APPOINTMENT                                                                   |
| 242817         | other                                 | REMOVED ACCIDENTALLY DUE TO CONFUSION RELATED TO IUS LOCATION                                            |
| 242912         | other                                 | DESIRES PREGNANCY                                                                                        |
| 243006         | other                                 | HARD TO MAKE APPOINTMENTS                                                                                |
| 243017         | other                                 | MOVING OUT OF STATE                                                                                      |
| 243205         | other                                 | DESIRE FOR PREGNANCY                                                                                     |
| 243211         | other                                 | WISH FOR PREGNANCY                                                                                       |
| 243216         | other                                 | WISH FOR PREGNANCY                                                                                       |
| 243318         | other                                 | SUBJECT DESIRES PREGNANCY                                                                                |
| 243606         | other                                 | WISH FOR PREGNANCY                                                                                       |
| 243808         | other                                 | SUBJECT IS MOVING OUT OF STATE.                                                                          |
| 243815         | other                                 | DUE TO DESIRES PREGNANCY                                                                                 |
| 243824         | other                                 | WISH FOR PREGNANCY                                                                                       |
| 243827         | other                                 | MOVING OUT OF TOWN.                                                                                      |
| 243901         | other                                 | MOVING TO NEW YORK                                                                                       |
| 243956         | other                                 | DIARY NON-COMPLIANCE                                                                                     |
| 243966         | other                                 | NON COMPLIANCE                                                                                           |
| 243970         | other                                 | HUSBAND COMPLAINS OF FEELING IUD                                                                         |
| 244006         | other                                 | TVUS PERFORMED IN U/S FACILITY IN THE NEXT BUILDING INDICATED LCS WERE LOCATED AT CERVICAL/VAGINAL CANAL |
| 244007         | other                                 | INSERTION FAILURE                                                                                        |
| 244126         | other                                 | RELOCATING TO PITTSBURGH                                                                                 |
| 244129         | other                                 | DESIRES PREGNANCY                                                                                        |
| 244133         | other                                 | DESIRES PREGNANCY                                                                                        |
| 244405         | other                                 | IMPROPER POSITION OF DEVICE                                                                              |
| 244418         | other                                 | WEIGHT GAIN WORSENING OF ACNE                                                                            |
| 244424         | other                                 | SUBJECT CURRENTLY MEETS EXCLUSION CRITERIA #24.                                                          |
| 244429         | other                                 | WANTING TO GET PREGNANT                                                                                  |
| 244449         | other                                 | WISHES PREGNANCY                                                                                         |
| 244611         | other                                 | PT. DESIRES PREGNANCY                                                                                    |
| 244614         | other                                 | NO LONGER NEEDS CONTRACEPTION                                                                            |
| 244712         | other                                 | WANTS TO BECOME PREGNANT                                                                                 |

Table 14.1.1 / 6: Listing of subjects who prematurely discontinued study medication with reason 'other' by treatment (all randomized subjects) (cont.)

TREATMENT: LCS16

| Subject number | Premature EOSM or never taken, reason | Premature EOSM other reason                                                  |
|----------------|---------------------------------------|------------------------------------------------------------------------------|
| 244801         | other                                 | STRINGS WERE BOTHERING PARTNER DURING SEX                                    |
| 244808         | other                                 | NON-COMPLIANCE WITH STUDY PROCEDURES                                         |
| 244925         | other                                 | DESIRE FOR PREGNANCY                                                         |
| 245001         | other                                 | DESIRE FOR PREGNANCY                                                         |
| 245011         | other                                 | DESIRE FOR PREGNANCY.                                                        |
| 245416         | other                                 | DESIRE FOR PREGNANCY                                                         |
| 245511         | other                                 | DESIRE FOR PREGNANCY.                                                        |
| 245522         | other                                 | DESIRE TO ENTER HCG WEIGHT LOSS PROGRAM.                                     |
| 245532         | other                                 | NO INSERTION ATTEMPTED DUE TO UNSURE UTERINE DEPTH AS OBSERVED BY ULTRASOUND |
| 245602         | other                                 | DESIRES INTRAUTERINE PREGNANCY                                               |
| 245707         | other                                 | WISHES TO BECOME PREGNANT                                                    |
| 245917         | other                                 | SUBJECT WANTS TO GET PREGNANT                                                |
| 245922         | other                                 | PT. MOVED OUT OF THE STUDY                                                   |
| 246124         | other                                 | SUBJECT HAD IUD REMOVED AT PRIVATE DOCTORS OFFICE                            |
| 246204         | other                                 | PARTNER BOTHERED BY STRING                                                   |
| 246221         | other                                 | WANTS TO CONCEIVE                                                            |

Global Biostatistics: /by-sasp/patdb/projects/de04209/310442/stat/prod\_interim03/pgms/t-ds3-2.sas epkll 07OCT2011 10:47

End of table

**Table 14.1.1 / 7: Subjects Disposition (all screened subjects)**

| Disposition (number of subjects) | LCS12         | LCS16         | Total         |
|----------------------------------|---------------|---------------|---------------|
| Enrolled                         |               |               | 3661          |
| Not randomized                   |               |               | 776           |
| Randomized                       | 1432 (100.0%) | 1453 (100.0%) | 2885 (100.0%) |
| Study drug never administered    | 0             | 2 ( 0.1%)     | 2 (<0.1%)     |
| Treated                          | 1432 (100.0%) | 1451 ( 99.9%) | 2883 (>99.9%) |
| Not completed study              | 612 ( 42.7%)  | 583 ( 40.1%)  | 1195 ( 41.4%) |
| Completed study                  | 819 ( 57.2%)  | 870 ( 59.9%)  | 1689 ( 58.5%) |

Global Biostatistics: /by-sasp/patdb/projects/de04209/310442/stat/prod\_interim03/pgms/t-ds3-2.sas epkl 07OCT2011 10:47  
End of table

**Table 14.1.1 / 8: Reason for discontinuation of study medication due to withdrawal of consent or AE by treatment and parity status (FAS)**

| Parity          |                                                    | LCS12         | LCS16         | Total         |
|-----------------|----------------------------------------------------|---------------|---------------|---------------|
| 0 births        | n                                                  | 556 (100.0%)  | 574 (100.0%)  | 1130 (100.0%) |
|                 | SM discontinued due to withdrawal of consent or AE |               |               |               |
|                 | no                                                 | 401 ( 72.1%)  | 444 ( 77.4%)  | 845 ( 74.8%)  |
|                 | yes                                                | 155 ( 27.9%)  | 130 ( 22.6%)  | 285 ( 25.2%)  |
|                 | missing                                            | 2 ( 0.4%)     | 1 ( 0.2%)     | 3 ( 0.3%)     |
|                 | progestin-related side effect                      | 21 ( 3.8%)    | 20 ( 3.5%)    | 41 ( 3.6%)    |
|                 | bleeding/non bleeding problem                      | 29 ( 5.2%)    | 32 ( 5.6%)    | 61 ( 5.4%)    |
|                 | UNK                                                | 5 ( 0.9%)     | 5 ( 0.9%)     | 10 ( 0.9%)    |
|                 | other                                              | 98 ( 17.6%)   | 72 ( 12.5%)   | 170 ( 15.0%)  |
| 1 birth or more | n                                                  | 876 (100.0%)  | 878 (100.0%)  | 1754 (100.0%) |
|                 | SM discontinued due to withdrawal of consent or AE |               |               |               |
|                 | no                                                 | 692 ( 79.0%)  | 699 ( 79.6%)  | 1391 ( 79.3%) |
|                 | yes                                                | 184 ( 21.0%)  | 179 ( 20.4%)  | 363 ( 20.7%)  |
|                 | missing                                            | 4 ( 0.5%)     | 2 ( 0.2%)     | 6 ( 0.3%)     |
|                 | progestin-related side effect                      | 27 ( 3.1%)    | 20 ( 2.3%)    | 47 ( 2.7%)    |
|                 | bleeding/non bleeding problem                      | 39 ( 4.5%)    | 39 ( 4.4%)    | 78 ( 4.4%)    |
|                 | UNK                                                | 9 ( 1.0%)     | 11 ( 1.3%)    | 20 ( 1.1%)    |
|                 | other                                              | 105 ( 12.0%)  | 107 ( 12.2%)  | 212 ( 12.1%)  |
| total           | n                                                  | 1432 (100.0%) | 1452 (100.0%) | 2884 (100.0%) |
|                 | SM discontinued due to withdrawal of consent or AE |               |               |               |
|                 | no                                                 | 1093 ( 76.3%) | 1143 ( 78.7%) | 2236 ( 77.5%) |
|                 | yes                                                | 339 ( 23.7%)  | 309 ( 21.3%)  | 648 ( 22.5%)  |
|                 | missing                                            | 6 ( 0.4%)     | 3 ( 0.2%)     | 9 ( 0.3%)     |
|                 | progestin-related side effect                      | 48 ( 3.4%)    | 40 ( 2.8%)    | 88 ( 3.1%)    |
|                 | bleeding/non bleeding problem                      | 68 ( 4.7%)    | 71 ( 4.9%)    | 139 ( 4.8%)   |
|                 | UNK                                                | 14 ( 1.0%)    | 16 ( 1.1%)    | 30 ( 1.0%)    |
|                 | other                                              | 203 ( 14.2%)  | 179 ( 12.3%)  | 382 ( 13.2%)  |

Note: SM = Study medication

Global Biostatistics: /by-sasp/patdb/projects/de04209/310442/stat/prod\_interim03/pgms/t-ds3-3.sas epkl1 07OCT2011 10:47

End of table

**Table 14.1.1 / 9: Half-yearly drop-out rates (Kaplan-Meier analysis) (FAS)**

| Treatment | Period        | half yearly drop-out rate [%] | cumulative drop-out rate [%] |
|-----------|---------------|-------------------------------|------------------------------|
| LCS12     | 1st half year | 10.00                         | 10.00                        |
|           | 2nd half year | 9.48                          | 18.53                        |
|           | 3rd half year | 8.93                          | 25.80                        |
|           | 4th half year | 9.24                          | 32.66                        |
|           | 5th half year | 7.48                          | 37.69                        |
|           | 6th half year | 7.74                          | 42.52                        |
| LCS16     | 1st half year | 8.78                          | 8.78                         |
|           | 2nd half year | 8.94                          | 16.93                        |
|           | 3rd half year | 8.15                          | 23.70                        |
|           | 4th half year | 8.70                          | 30.34                        |
|           | 5th half year | 8.23                          | 36.07                        |
|           | 6th half year | 5.62                          | 39.67                        |
| Total     | 1st half year | 9.38                          | 9.38                         |
|           | 2nd half year | 9.21                          | 17.73                        |
|           | 3rd half year | 8.53                          | 24.75                        |
|           | 4th half year | 8.96                          | 31.49                        |
|           | 5th half year | 7.86                          | 36.88                        |
|           | 6th half year | 6.66                          | 41.08                        |

Global Biostatistics: /by-sasp/patdb/projects/de04209/310442/stat/prod\_interim03/pgms/tf-km-drop-out.sas epkl 07OCT2011 10:47  
 End of table





**Table 14.1.1 / 10: Number of subjects with at least one minor protocol deviation by treatment (FAS)**

| Visit                                    | LCS12  |               | LCS16  |               | Total  |               |
|------------------------------------------|--------|---------------|--------|---------------|--------|---------------|
|                                          | Events | N=1432 (100%) | Events | N=1452 (100%) | Events | N=2884 (100%) |
| at least one minor protocol deviation    | 4123   | 1259 ( 87.9%) | 3797   | 1162 ( 80.0%) | 7920   | 2421 ( 83.9%) |
| inclusion/exclusion error at study entry | 63     | 56 ( 3.9%)    | 64     | 60 ( 4.1%)    | 127    | 116 ( 4.0%)   |
| randomization/ registration error        | 10     | 10 ( 0.7%)    | 7      | 7 ( 0.5%)     | 17     | 17 ( 0.6%)    |
| withdrawal crit. pres. but not withdrawn | 5      | 4 ( 0.3%)     | 3      | 3 ( 0.2%)     | 8      | 7 ( 0.2%)     |
| excluded concomitant treatment           | 20     | 20 ( 1.4%)    | 13     | 13 ( 0.9%)    | 33     | 33 ( 1.1%)    |
| treatment deviation                      | 59     | 59 ( 4.1%)    | 71     | 71 ( 4.9%)    | 130    | 130 ( 4.5%)   |
| time schedule deviation                  | 1864   | 716 ( 50.0%)  | 1918   | 741 ( 51.0%)  | 3782   | 1457 ( 50.5%) |
| procedure deviation                      | 2102   | 1088 ( 76.0%) | 1721   | 883 ( 60.8%)  | 3823   | 1971 ( 68.3%) |

Global Biostatistics: /by-sasp/patdb/projects/de04209/310442/stat/prod\_interim03/pgms/t-dv.sas epkl 07OCT2011 10:48

End of table

**Table 14.1.1 / 11: Number of subjects with at least one major protocol deviation by treatment (FAS)**

| Visit                                    | LCS12  |               | LCS16  |               | Total  |               |
|------------------------------------------|--------|---------------|--------|---------------|--------|---------------|
|                                          | Events | N=1432 (100%) | Events | N=1452 (100%) | Events | N=2884 (100%) |
| at least one major protocol deviation    | 45     | 39 ( 2.7%)    | 23     | 22 ( 1.5%)    | 68     | 61 ( 2.1%)    |
| inclusion/exclusion error at study entry | 2      | 2 ( 0.1%)     | 1      | 1 (<0.1%)     | 3      | 3 ( 0.1%)     |
| excluded concomitant treatment           | 43     | 38 ( 2.7%)    | 22     | 22 ( 1.5%)    | 65     | 60 ( 2.1%)    |

Global Biostatistics: /by-sasp/patdb/projects/de04209/310442/stat/prod\_interim03/pgms/t-dv.sas epkll 07OCT2011 10:48

End of table

**Table 14.1.1 / 12: Listing of subjects with at least one major protocol deviation by treatment (FAS)**

| TREATMENT | Subject number        | Time key first level           | Protocol deviation type                  |
|-----------|-----------------------|--------------------------------|------------------------------------------|
| LCS12     | 140911                | End of study-Month 36          | excluded concomitant treatment           |
|           | 150503                | Baseline                       | excluded concomitant treatment           |
|           | 160105                | Baseline                       | excluded concomitant treatment           |
|           | 160208                | Month 12                       | excluded concomitant treatment           |
|           | 160406                | Month 24                       | excluded concomitant treatment           |
|           | 160710                | Screening                      | inclusion/exclusion error at study entry |
|           | 170603                | Month 12                       | excluded concomitant treatment           |
|           | 170801                | Month 6                        | excluded concomitant treatment           |
|           | 180652                | Month 18                       | excluded concomitant treatment           |
|           | 180672                | Baseline                       | excluded concomitant treatment           |
|           | 180705                | Month 6                        | excluded concomitant treatment           |
|           | 180722                | Screening                      | inclusion/exclusion error at study entry |
|           |                       | Month 6                        | excluded concomitant treatment           |
|           |                       | Month 18                       | excluded concomitant treatment           |
|           | 180733                | End of study-Month 36          | excluded concomitant treatment           |
|           | 180739                | End of study-Month 36          | excluded concomitant treatment           |
|           | 180740                | End of study-Month 36          | excluded concomitant treatment           |
|           | 190110                | Month 6                        | excluded concomitant treatment           |
|           | 190418                | Year 3                         | excluded concomitant treatment           |
|           | 200104                | Month 6                        | excluded concomitant treatment           |
|           |                       | End of study-Month 36          | excluded concomitant treatment           |
|           | 200111                | Month 3                        | excluded concomitant treatment           |
|           | 200503                | Month 3                        | excluded concomitant treatment           |
|           |                       |                                | excluded concomitant treatment           |
|           | 200611                | Month 9                        | excluded concomitant treatment           |
|           | 200616                | End of study-Month 36          | excluded concomitant treatment           |
|           | 200619                | End of study-Month 36          | excluded concomitant treatment           |
|           | 200629                | Month 18                       | excluded concomitant treatment           |
|           | 200904                | Month 24                       | excluded concomitant treatment           |
|           |                       | End of study-Month 36          | excluded concomitant treatment           |
|           | 200908                | Month 9                        | excluded concomitant treatment           |
|           |                       | End of study-Month 36          | excluded concomitant treatment           |
|           | 200910                | Month 3                        | excluded concomitant treatment           |
|           | 200914                | Month 12                       | excluded concomitant treatment           |
|           | 230515                | Month 12                       | excluded concomitant treatment           |
|           | 241707                | Month 24                       | excluded concomitant treatment           |
|           | 241710                | Month 30                       | excluded concomitant treatment           |
|           | 242902                | Baseline                       | excluded concomitant treatment           |
|           | 243910                | Month 3                        | excluded concomitant treatment           |
|           | 243943                | Baseline                       | excluded concomitant treatment           |
|           | 244428                | Month 9                        | excluded concomitant treatment           |
|           | 244523                | Year 3                         | excluded concomitant treatment           |
| 244701    | End of study-Month 36 | excluded concomitant treatment |                                          |
| 244917    | Baseline              | excluded concomitant treatment |                                          |

**Table 14.1.1 / 12: Listing of subjects with at least one major protocol deviation by treatment (FAS)**

| TREATMENT | Subject number | Time key first level  | Protocol deviation type                  |
|-----------|----------------|-----------------------|------------------------------------------|
|           | 246141         | Month 24              | excluded concomitant treatment           |
| LCS16     | 160211         | End of study-Month 36 | excluded concomitant treatment           |
|           | 160533         | End of study-Month 36 | excluded concomitant treatment           |
|           | 161217         | Baseline              | excluded concomitant treatment           |
|           | 180632         | End of study-Month 36 | excluded concomitant treatment           |
|           | 180706         | Month 30              | excluded concomitant treatment           |
|           | 180708         | Month 18              | excluded concomitant treatment           |
|           | 190134         | Month 9               | excluded concomitant treatment           |
|           | 200301         | Baseline              | excluded concomitant treatment           |
|           | 200507         | Treatment             | excluded concomitant treatment           |
|           | 200606         | Screening             | inclusion/exclusion error at study entry |
|           |                | Month 9               | excluded concomitant treatment           |
|           | 200609         | Month 9               | excluded concomitant treatment           |
|           | 200633         | End of study-Month 36 | excluded concomitant treatment           |
|           | 200917         | Baseline              | excluded concomitant treatment           |
|           | 241176         | Month 30              | excluded concomitant treatment           |
|           | 241709         | Month 3               | excluded concomitant treatment           |
|           | 242914         | Baseline              | excluded concomitant treatment           |
|           | 243901         | Month 30              | excluded concomitant treatment           |
|           | 243963         | Month 12              | excluded concomitant treatment           |
|           | 244010         | End of study-Month 36 | excluded concomitant treatment           |
|           | 244505         | End of study-Month 36 | excluded concomitant treatment           |
|           | 244609         | Baseline              | excluded concomitant treatment           |
|           | 244925         | Treatment             | excluded concomitant treatment           |

Global Biostatistics: /by-sasp/patdb/projects/de04209/310442/stat/prod\_interim03/pgms/t-dv.sas epkl 07OCT2011 10:48

End of table

**Table 14.1.1 / 13: Listing of inclusion- and exclusion criteria**

| Inclusion/exclusion question | Valid after amendment | Inclusion/exclusion question text                                                                                                                                                                                                    |
|------------------------------|-----------------------|--------------------------------------------------------------------------------------------------------------------------------------------------------------------------------------------------------------------------------------|
| IN 1                         | 0                     | SIGNED INFORMED CONSENT                                                                                                                                                                                                              |
| IN 2                         | 0                     | AGE BETWEEN 18 AND 35 YEARS (INCLUSIVE), IN GOOD GENERAL HEALTH AND REQUESTING CONTRACEPTION                                                                                                                                         |
| IN 3                         | 0                     | IN THE OPINION OF THE INVESTIGATOR, SUITABLE GENERAL AND UTERINE CONDITIONS FOR INSERTING THE LCS                                                                                                                                    |
| IN 4                         | 0                     | CLINICALLY NORMAL SAFETY LABORATORY RESULTS (I.E. INSIDE THE SPECIFIED RANGE FOR INCLUSION)                                                                                                                                          |
| IN 5                         | 0                     | WILLINGNESS AND ABILITY TO ATTEND THE SCHEDULED VISITS AND TO COMPLY WITH THE STUDY PROCEDURES                                                                                                                                       |
| IN 6                         | 0                     | REGULAR MENSTRUAL CYCLES (LENGTH OF CYCLE 21-35 DAYS) (I.E. ENDOGENOUS CYCLICITY WITHOUT HORMONAL CONTRACEPTIVE USE)                                                                                                                 |
| EX 1                         | 0                     | KNOWN OR SUSPECTED PREGNANCY OR IS LACTATING                                                                                                                                                                                         |
| EX 2                         | 0                     | VAGINAL DELIVERY, CESAREAN DELIVERY, OR ABORTION WITHIN 6 WEEKS PRIOR TO VISIT 1*                                                                                                                                                    |
| EX 3                         | 0                     | HISTORY OF ECTOPIC PREGNANCIES                                                                                                                                                                                                       |
| EX 4                         | 0                     | INFECTED ABORTION OR POSTPARTUM ENDOMETRITIS WITHIN 3 MONTHS PRIOR TO VISIT 1                                                                                                                                                        |
| EX 5                         | 0                     | ABNORMAL UTERINE BLEEDING OF UNKNOWN ORIGIN                                                                                                                                                                                          |
| EX 6                         | 0                     | ANY GENITAL INFECTION (UNTIL SUCCESSFULLY TREATED)                                                                                                                                                                                   |
| EX 7                         | 0                     | DESCRIPTIVE DIAGNOSES OF EPITHELIAL CELL ATYPIAS (NOT BENIGN ATYPIAS) OR MORE SERIOUS DISORDER IN CERVICAL SMEAR (ACCORDING TO THE BETHESDA SYSTEM) AT SCREENING AND NOT RESPONDING TO TREATMENT<br>2 ABNORMAL CERVICAL SMEAR RESULT |
| EX 8                         | 0                     | HISTORY OF, OR CURRENT, PELVIC INFLAMMATORY DISEASE                                                                                                                                                                                  |
| EX 9                         | 0                     | CONGENITAL OR ACQUIRED UTERINE ANOMALY                                                                                                                                                                                               |
| EX 10                        | 0                     | ANY DISTORTION OF THE UTERINE CAVITY (BY E.G. FIBROIDS) LIKELY TO CAUSE PROBLEMS (IN THE OPINION OF THE INVESTIGATOR) DURING INSERTION, RETENTION OR REMOVAL OF THE LCS                                                              |
| EX 11                        | 0                     | HISTORY OF, DIAGNOSED OR SUSPECTED GENITAL MALIGNANCY, AND UNTREATED CERVICAL DYSPLASIA                                                                                                                                              |

**Table 14.1.1 / 13: Listing of inclusion- and exclusion criteria**

| Inclusion/<br>exclusion<br>question | Valid after<br>amendment | Inclusion/exclusion question text                                                                                                                                                                                                                 |
|-------------------------------------|--------------------------|---------------------------------------------------------------------------------------------------------------------------------------------------------------------------------------------------------------------------------------------------|
| EX 12                               | 0                        | CURRENT DEEP VENOUS THROMBOSIS OR THROMBOPHLEBITIS; HISTORY OF DEEP VENOUS THROMBOSIS                                                                                                                                                             |
| EX 13                               | 0<br>2                   | CURRENT ENDOMETRIAL POLYP(S)<br>CLINICALLY SIGNIFICANT ENDOMETRIAL POLYP(S), WHICH, IN THE OPINION OF THE INVESTIGATOR, WILL INTERFERE WITH THE ASSESSMENT OF THE BLEEDING PROFILE DURING THE STUDY                                               |
| EX 14                               | 0<br>2                   | OVARIAN CYST(S) WITH DIAMETER > 3 CM<br>CLINICALLY SIGNIFICANT OVARIAN CYST(S)                                                                                                                                                                    |
| EX 15                               | 0                        | CONCOMITANT USE OF OTHER SEX-HORMONE CONTAINING PREPARATIONS OR INTRAUTERINE DEVICE                                                                                                                                                               |
| EX 16                               | 0                        | AND IF ENTERING SUBSET 2 OR SUBSET 3: ANY SEX-HORMONE ADMINISTRATION WITHIN ONE MONTH PRIOR TO START OF THE STUDY MEDICATION<br>USE OF ANY LONG-ACTING INJECTABLE SEX-HORMONE PREPARATIONS WITHIN 12 MONTHS PRIOR TO START OF STUDY MEDICATION,   |
| EX 17                               | 0                        | IF ENTERING SUBSET 2: ANY DRUG THAT MIGHT AFFECT THE BLOOD COAGULATION (E.G. HEPARIN, COUMARIN) WITHIN ONE MONTH PRIOR TO START OF THE STUDY MEDICATION                                                                                           |
| EX 18                               | 0                        | IF ENTERING SUBSET 2: ANY KNOWN CONDITION THAT MIGHT AFFECT THE BLOOD COAGULATION                                                                                                                                                                 |
| EX 19                               | 0                        | ESTABLISHED IMMUNODEFICIENCY                                                                                                                                                                                                                      |
| EX 20                               | 0                        | ANY KNOWN HYPERSENSITIVITY TO THE CONSTITUENTS OF THE LCS                                                                                                                                                                                         |
| EX 21                               | 0                        | DIAGNOSED OR SUSPECTED MALIGNANT OR PREMALIGNANT DISEASE AT SCREENING                                                                                                                                                                             |
| EX 22                               | 0                        | ARTERIAL HYPERTENSION NOT RESPONDING TO TREATMENT, WITH SYSTOLIC PRESSURE > 140 MMHG OR DIASTOLIC PRESSURE > 90 MMHG                                                                                                                              |
| EX 23                               | 0                        | CURRENT (OR HISTORY OF) SEVERE HEPATIC DISEASES INCLUDING BENIGN OR MALIGNANT TUMORS. THERE SHOULD BE AN INTERVAL OF A LEAST 3 MONTHS BETWEEN THE START OF STUDY TREATMENT (I.E. LCS INSERTION) AND THE RETURN OF LIVER FUNCTION VALUES TO NORMAL |
| EX 24                               | 0                        | HISTORY OF CHRONIC ALCOHOLISM, DRUG DEPENDENCE OR ABUSE, PSYCHOTIC STATES OR SEVERE NEUROSIS OR ANY OTHER CONDITION THAT, BY JUDGMENT OF THE INVESTIGATOR, MIGHT IMPAIR PATIENT'S ABILITY TO COOPERATE                                            |
| EX 25                               | 0                        | KNOWN OR SUSPECTED HIV INFECTION OR HIGH RISK FOR SEXUALLY TRANSMITTED DISEASE                                                                                                                                                                    |

**Table 14.1.1 / 13: Listing of inclusion- and exclusion criteria**

| Inclusion/<br>exclusion<br>question | Valid after<br>amendment | Inclusion/exclusion question text                                                                                                                                                                              |
|-------------------------------------|--------------------------|----------------------------------------------------------------------------------------------------------------------------------------------------------------------------------------------------------------|
| EX 26                               | 0                        | ANY CLINICALLY SIGNIFICANT CONDITION OR LABORATORY RESULT THAT, IN THE OPINION OF THE INVESTIGATOR, COMPROMISES PATIENT'S SAFETY, MIGHT INTERFERE WITH THE EVALUATIONS OR PREVENTS THE COMPLETION OF THE STUDY |
| EX 27                               | 0                        | PARTICIPATED IN ANOTHER CLINICAL STUDY OR CONSUMED ANOTHER EXPERIMENTAL DRUG WITHIN 1 MONTH PRIOR TO VISIT 1                                                                                                   |
| EX 28                               | 0                        | PREVIOUS PARTICIPATION IN THIS STUDY                                                                                                                                                                           |
| EX 29                               | 0                        | CLOSE AFFILIATION WITH THE INVESTIGATIONAL SITE; E.G. CLOSE RELATIVE OF THE INVESTIGATOR, DEPENDANT PERSON, EMPLOYEE OR STUDENT OF THE INVESTIGATIONAL SITE                                                    |

Note: IN=Inclusion criterion, EX=Exclusion criterion. There were 5 amendments to the original study protocol.

Note: Valid after amendment=0 indicates this criterion was valid for all subjects using the original study protocol if it was not amended later.

Global Biostatistics: /by-sasp/patdb/projects/de04209/310442/stat/prod\_interim03/pgms/t-dv.sas epkl 07OCT2011 10:48

End of table

**Table 14.1.1 / 14: Number of subjects by answer to inclusion- and exclusion criteria (FAS)**

| Inclusion/exclusion question        | LCS12 (N=1432) | LCS16 (N=1452) | Total (N=2884) |
|-------------------------------------|----------------|----------------|----------------|
| IN 1                                |                |                |                |
| Inclusion/exclusion question answer |                |                |                |
| Number of subjects                  | 1432 (100.0%)  | 1452 (100.0%)  | 2884 (100.0%)  |
| yes                                 | 1432 (100.0%)  | 1452 (100.0%)  | 2884 (100.0%)  |
| IN 2                                |                |                |                |
| Inclusion/exclusion question answer |                |                |                |
| Number of subjects                  | 1432 (100.0%)  | 1452 (100.0%)  | 2884 (100.0%)  |
| yes                                 | 1432 (100.0%)  | 1452 (100.0%)  | 2884 (100.0%)  |
| IN 3                                |                |                |                |
| Inclusion/exclusion question answer |                |                |                |
| Number of subjects                  | 1432 (100.0%)  | 1452 (100.0%)  | 2884 (100.0%)  |
| missing                             | 1 (<0.1%)      | 0              | 1 (<0.1%)      |
| yes                                 | 1431 (>99.9%)  | 1452 (100.0%)  | 2883 (>99.9%)  |
| IN 4                                |                |                |                |
| Inclusion/exclusion question answer |                |                |                |
| Number of subjects                  | 1432 (100.0%)  | 1452 (100.0%)  | 2884 (100.0%)  |
| missing                             | 1 (<0.1%)      | 4 ( 0.3%)      | 5 ( 0.2%)      |
| no                                  | 1 (<0.1%)      | 3 ( 0.2%)      | 4 ( 0.1%)      |
| yes                                 | 1430 ( 99.9%)  | 1445 ( 99.5%)  | 2875 ( 99.7%)  |
| IN 5                                |                |                |                |
| Inclusion/exclusion question answer |                |                |                |
| Number of subjects                  | 1432 (100.0%)  | 1452 (100.0%)  | 2884 (100.0%)  |
| yes                                 | 1432 (100.0%)  | 1452 (100.0%)  | 2884 (100.0%)  |
| IN 6                                |                |                |                |
| Inclusion/exclusion question answer |                |                |                |
| Number of subjects                  | 1432 (100.0%)  | 1452 (100.0%)  | 2884 (100.0%)  |
| no                                  | 1 (<0.1%)      | 4 ( 0.3%)      | 5 ( 0.2%)      |
| yes                                 | 1431 (>99.9%)  | 1448 ( 99.7%)  | 2879 ( 99.8%)  |
| EX 1                                |                |                |                |
| Inclusion/exclusion question answer |                |                |                |
| Number of subjects                  | 1432 (100.0%)  | 1452 (100.0%)  | 2884 (100.0%)  |
| no                                  | 1432 (100.0%)  | 1452 (100.0%)  | 2884 (100.0%)  |
| EX 2                                |                |                |                |
| Inclusion/exclusion question answer |                |                |                |
| Number of subjects                  | 1432 (100.0%)  | 1452 (100.0%)  | 2884 (100.0%)  |
| no                                  | 1430 ( 99.9%)  | 1452 (100.0%)  | 2882 (>99.9%)  |
| yes                                 | 2 ( 0.1%)      | 0              | 2 (<0.1%)      |
| EX 3                                |                |                |                |
| Inclusion/exclusion question answer |                |                |                |
| Number of subjects                  | 1432 (100.0%)  | 1452 (100.0%)  | 2884 (100.0%)  |
| no                                  | 1432 (100.0%)  | 1452 (100.0%)  | 2884 (100.0%)  |



**Table 14.1.1 / 14: Number of subjects by answer to inclusion- and exclusion criteria (FAS)**

| Inclusion/exclusion question | LCS12 (N=1432)                      | LCS16 (N=1452) | Total (N=2884) |               |
|------------------------------|-------------------------------------|----------------|----------------|---------------|
| EX 4                         | Inclusion/exclusion question answer |                |                |               |
|                              | Number of subjects                  | 1432 (100.0%)  | 1452 (100.0%)  | 2884 (100.0%) |
|                              | no                                  | 1432 (100.0%)  | 1452 (100.0%)  | 2884 (100.0%) |
| EX 5                         | Inclusion/exclusion question answer |                |                |               |
|                              | Number of subjects                  | 1432 (100.0%)  | 1452 (100.0%)  | 2884 (100.0%) |
|                              | no                                  | 1431 (>99.9%)  | 1452 (100.0%)  | 2883 (>99.9%) |
|                              | yes                                 | 1 (<0.1%)      | 0              | 1 (<0.1%)     |
| EX 6                         | Inclusion/exclusion question answer |                |                |               |
|                              | Number of subjects                  | 1432 (100.0%)  | 1452 (100.0%)  | 2884 (100.0%) |
|                              | missing                             | 0              | 1 (<0.1%)      | 1 (<0.1%)     |
|                              | no                                  | 1432 (100.0%)  | 1449 (99.8%)   | 2881 (99.9%)  |
|                              | yes                                 | 0              | 2 (0.1%)       | 2 (<0.1%)     |
| EX 7                         | Inclusion/exclusion question answer |                |                |               |
|                              | Number of subjects                  | 1432 (100.0%)  | 1452 (100.0%)  | 2884 (100.0%) |
|                              | missing                             | 1 (<0.1%)      | 3 (0.2%)       | 4 (0.1%)      |
|                              | no                                  | 1429 (99.8%)   | 1448 (99.7%)   | 2877 (99.8%)  |
|                              | yes                                 | 2 (0.1%)       | 1 (<0.1%)      | 3 (0.1%)      |
| EX 8                         | Inclusion/exclusion question answer |                |                |               |
|                              | Number of subjects                  | 1432 (100.0%)  | 1452 (100.0%)  | 2884 (100.0%) |
|                              | no                                  | 1431 (>99.9%)  | 1452 (100.0%)  | 2883 (>99.9%) |
|                              | yes                                 | 1 (<0.1%)      | 0              | 1 (<0.1%)     |
| EX 9                         | Inclusion/exclusion question answer |                |                |               |
|                              | Number of subjects                  | 1432 (100.0%)  | 1452 (100.0%)  | 2884 (100.0%) |
|                              | missing                             | 0              | 1 (<0.1%)      | 1 (<0.1%)     |
|                              | no                                  | 1432 (100.0%)  | 1451 (>99.9%)  | 2883 (>99.9%) |
| EX 10                        | Inclusion/exclusion question answer |                |                |               |
|                              | Number of subjects                  | 1432 (100.0%)  | 1452 (100.0%)  | 2884 (100.0%) |
|                              | missing                             | 1 (<0.1%)      | 1 (<0.1%)      | 2 (<0.1%)     |
|                              | no                                  | 1431 (>99.9%)  | 1451 (>99.9%)  | 2882 (>99.9%) |
| EX 11                        | Inclusion/exclusion question answer |                |                |               |
|                              | Number of subjects                  | 1432 (100.0%)  | 1452 (100.0%)  | 2884 (100.0%) |
|                              | missing                             | 0              | 1 (<0.1%)      | 1 (<0.1%)     |
|                              | no                                  | 1432 (100.0%)  | 1451 (>99.9%)  | 2883 (>99.9%) |

**Table 14.1.1 / 14: Number of subjects by answer to inclusion- and exclusion criteria (FAS)**

| Inclusion/exclusion question        | LCS12 (N=1432) | LCS16 (N=1452) | Total (N=2884) |
|-------------------------------------|----------------|----------------|----------------|
| EX 12                               |                |                |                |
| Inclusion/exclusion question answer |                |                |                |
| Number of subjects                  | 1432 (100.0%)  | 1452 (100.0%)  | 2884 (100.0%)  |
| no                                  | 1432 (100.0%)  | 1452 (100.0%)  | 2884 (100.0%)  |
| EX 13                               |                |                |                |
| Inclusion/exclusion question answer |                |                |                |
| Number of subjects                  | 1432 (100.0%)  | 1452 (100.0%)  | 2884 (100.0%)  |
| no                                  | 1432 (100.0%)  | 1452 (100.0%)  | 2884 (100.0%)  |
| EX 14                               |                |                |                |
| Inclusion/exclusion question answer |                |                |                |
| Number of subjects                  | 1432 (100.0%)  | 1452 (100.0%)  | 2884 (100.0%)  |
| missing                             | 0              | 1 (<0.1%)      | 1 (<0.1%)      |
| no                                  | 1427 ( 99.7%)  | 1446 ( 99.6%)  | 2873 ( 99.6%)  |
| yes                                 | 5 ( 0.3%)      | 5 ( 0.3%)      | 10 ( 0.3%)     |
| EX 15                               |                |                |                |
| Inclusion/exclusion question answer |                |                |                |
| Number of subjects                  | 1432 (100.0%)  | 1452 (100.0%)  | 2884 (100.0%)  |
| no                                  | 1431 (>99.9%)  | 1451 (>99.9%)  | 2882 (>99.9%)  |
| yes                                 | 1 (<0.1%)      | 1 (<0.1%)      | 2 (<0.1%)      |
| EX 16                               |                |                |                |
| Inclusion/exclusion question answer |                |                |                |
| Number of subjects                  | 1432 (100.0%)  | 1452 (100.0%)  | 2884 (100.0%)  |
| no                                  | 1431 (>99.9%)  | 1452 (100.0%)  | 2883 (>99.9%)  |
| yes                                 | 1 (<0.1%)      | 0              | 1 (<0.1%)      |
| EX 17                               |                |                |                |
| Inclusion/exclusion question answer |                |                |                |
| Number of subjects                  | 1432 (100.0%)  | 1451 (100.0%)  | 2883 (100.0%)  |
| no                                  | 31 ( 2.2%)     | 30 ( 2.1%)     | 61 ( 2.1%)     |
| not applicable                      | 1401 ( 97.8%)  | 1421 ( 97.9%)  | 2822 ( 97.9%)  |
| EX 18                               |                |                |                |
| Inclusion/exclusion question answer |                |                |                |
| Number of subjects                  | 1432 (100.0%)  | 1451 (100.0%)  | 2883 (100.0%)  |
| no                                  | 32 ( 2.2%)     | 30 ( 2.1%)     | 62 ( 2.2%)     |
| not applicable                      | 1400 ( 97.8%)  | 1421 ( 97.9%)  | 2821 ( 97.8%)  |
| EX 19                               |                |                |                |
| Inclusion/exclusion question answer |                |                |                |
| Number of subjects                  | 1432 (100.0%)  | 1452 (100.0%)  | 2884 (100.0%)  |
| no                                  | 1432 (100.0%)  | 1452 (100.0%)  | 2884 (100.0%)  |
| EX 20                               |                |                |                |
| Inclusion/exclusion question answer |                |                |                |
| Number of subjects                  | 1432 (100.0%)  | 1452 (100.0%)  | 2884 (100.0%)  |
| no                                  | 1432 (100.0%)  | 1452 (100.0%)  | 2884 (100.0%)  |

**Table 14.1.1 / 14: Number of subjects by answer to inclusion- and exclusion criteria (FAS)**

| Inclusion/exclusion question        | LCS12 (N=1432) | LCS16 (N=1452) | Total (N=2884) |
|-------------------------------------|----------------|----------------|----------------|
| EX 21                               |                |                |                |
| Inclusion/exclusion question answer |                |                |                |
| Number of subjects                  | 1432 (100.0%)  | 1452 (100.0%)  | 2884 (100.0%)  |
| missing                             | 1 (<0.1%)      | 1 (<0.1%)      | 2 (<0.1%)      |
| no                                  | 1431 (>99.9%)  | 1451 (>99.9%)  | 2882 (>99.9%)  |
| EX 22                               |                |                |                |
| Inclusion/exclusion question answer |                |                |                |
| Number of subjects                  | 1432 (100.0%)  | 1452 (100.0%)  | 2884 (100.0%)  |
| no                                  | 1431 (>99.9%)  | 1449 ( 99.8%)  | 2880 ( 99.9%)  |
| yes                                 | 1 (<0.1%)      | 3 ( 0.2%)      | 4 ( 0.1%)      |
| EX 23                               |                |                |                |
| Inclusion/exclusion question answer |                |                |                |
| Number of subjects                  | 1432 (100.0%)  | 1452 (100.0%)  | 2884 (100.0%)  |
| no                                  | 1432 (100.0%)  | 1452 (100.0%)  | 2884 (100.0%)  |
| EX 24                               |                |                |                |
| Inclusion/exclusion question answer |                |                |                |
| Number of subjects                  | 1432 (100.0%)  | 1452 (100.0%)  | 2884 (100.0%)  |
| no                                  | 1432 (100.0%)  | 1452 (100.0%)  | 2884 (100.0%)  |
| EX 25                               |                |                |                |
| Inclusion/exclusion question answer |                |                |                |
| Number of subjects                  | 1432 (100.0%)  | 1452 (100.0%)  | 2884 (100.0%)  |
| no                                  | 1432 (100.0%)  | 1452 (100.0%)  | 2884 (100.0%)  |
| EX 26                               |                |                |                |
| Inclusion/exclusion question answer |                |                |                |
| Number of subjects                  | 1432 (100.0%)  | 1452 (100.0%)  | 2884 (100.0%)  |
| missing                             | 0              | 6 ( 0.4%)      | 6 ( 0.2%)      |
| no                                  | 1432 (100.0%)  | 1444 ( 99.4%)  | 2876 ( 99.7%)  |
| yes                                 | 0              | 2 ( 0.1%)      | 2 (<0.1%)      |
| EX 27                               |                |                |                |
| Inclusion/exclusion question answer |                |                |                |
| Number of subjects                  | 1432 (100.0%)  | 1452 (100.0%)  | 2884 (100.0%)  |
| no                                  | 1431 (>99.9%)  | 1452 (100.0%)  | 2883 (>99.9%)  |
| yes                                 | 1 (<0.1%)      | 0              | 1 (<0.1%)      |
| EX 28                               |                |                |                |
| Inclusion/exclusion question answer |                |                |                |
| Number of subjects                  | 1432 (100.0%)  | 1452 (100.0%)  | 2884 (100.0%)  |
| no                                  | 1432 (100.0%)  | 1452 (100.0%)  | 2884 (100.0%)  |
| EX 29                               |                |                |                |
| Inclusion/exclusion question answer |                |                |                |
| Number of subjects                  | 1432 (100.0%)  | 1452 (100.0%)  | 2884 (100.0%)  |
| no                                  | 1432 (100.0%)  | 1452 (100.0%)  | 2884 (100.0%)  |

**Table 14.1.1 / 15: Number of subjects who fulfilled all inclusion criteria and no exclusion criteria present by treatment (FAS)**

|                        | LCS12         | LCS16         | Total         |
|------------------------|---------------|---------------|---------------|
| Number of subjects     | 1432 (100.0%) | 1452 (100.0%) | 2884 (100.0%) |
| All criteria fulfilled |               |               |               |
| no                     | 22 ( 1.5%)    | 35 ( 2.4%)    | 57 ( 2.0%)    |
| yes                    | 1410 ( 98.5%) | 1417 ( 97.6%) | 2827 ( 98.0%) |

Note: For some subjects, answers to inclusion or exclusion criteria are missing.

For inclusion criteria, missing answers were set to NO. For exclusion criteria, missing answers were set to YES

Global Biostatistics: /by-sasp/patdb/projects/de04209/310442/stat/prod\_interim03/pgms/t-dv.sas epkl 07OCT2011 10:48

End of table

**Table 14.1.1 / 16: Demographics (FAS)**

|                     | LCS12 (N=1432) | LCS16 (N=1452) | Total (N=2884) |
|---------------------|----------------|----------------|----------------|
| Number of Subjects  | 1432 (100.0%)  | 1452 (100.0%)  | 2884 (100.0%)  |
| Sex                 |                |                |                |
| female              | 1432 (100.0%)  | 1452 (100.0%)  | 2884 (100.0%)  |
| Race                |                |                |                |
| Caucasian           | 1142 ( 79.7%)  | 1164 ( 80.2%)  | 2306 ( 80.0%)  |
| Black               | 75 ( 5.2%)     | 74 ( 5.1%)     | 149 ( 5.2%)    |
| Hispanic            | 165 ( 11.5%)   | 159 ( 11.0%)   | 324 ( 11.2%)   |
| Asian               | 11 ( 0.8%)     | 17 ( 1.2%)     | 28 ( 1.0%)     |
| other               | 39 ( 2.7%)     | 38 ( 2.6%)     | 77 ( 2.7%)     |
| Age (years)         |                |                |                |
| n                   | 1432           | 1452           | 2884           |
| Nmiss               | 0              | 0              | 0              |
| Min                 | 18             | 18             | 18             |
| Mean                | 27.2           | 27.1           | 27.1           |
| SD                  | 4.7            | 4.9            | 4.8            |
| Q1                  | 23.0           | 23.0           | 23.0           |
| Median              | 27.0           | 27.0           | 27.0           |
| Q3                  | 31.0           | 31.0           | 31.0           |
| Max                 | 35             | 35             | 35             |
| Weight derived (kg) |                |                |                |
| n                   | 1431           | 1448           | 2879           |
| Nmiss               | 1              | 4              | 5              |
| Min                 | 38             | 38             | 38             |
| Mean                | 68.7           | 68.7           | 68.7           |
| SD                  | 15.3           | 15.5           | 15.4           |
| Q1                  | 58.0           | 58.0           | 58.0           |
| Median              | 65.0           | 65.0           | 65.0           |
| Q3                  | 76.0           | 76.0           | 76.0           |
| Max                 | 155            | 173            | 173            |
| Height derived (cm) |                |                |                |
| n                   | 1431           | 1449           | 2880           |
| Nmiss               | 1              | 3              | 4              |
| Min                 | 130            | 124            | 124            |
| Mean                | 164.7          | 164.7          | 164.7          |
| SD                  | 6.8            | 7.1            | 7.0            |
| Q1                  | 160.0          | 160.0          | 160.0          |
| Median              | 165.0          | 165.0          | 165.0          |
| Q3                  | 170.0          | 170.0          | 170.0          |
| Max                 | 186            | 188            | 188            |

**Table 14.1.1 / 16: Demographics (FAS)**

|                          | LCS12 (N=1432) | LCS16 (N=1452) | Total (N=2884) |
|--------------------------|----------------|----------------|----------------|
| BMI (kg/m <sup>2</sup> ) |                |                |                |
| n                        | 1431           | 1448           | 2879           |
| Nmiss                    | 1              | 4              | 5              |
| Min                      | 15.6           | 15.2           | 15.2           |
| Mean                     | 25.32          | 25.32          | 25.32          |
| SD                       | 5.42           | 5.49           | 5.46           |
| Q1                       | 21.50          | 21.50          | 21.50          |
| Median                   | 23.90          | 24.00          | 24.00          |
| Q3                       | 28.00          | 27.90          | 27.90          |
| Max                      | 54.9           | 57.6           | 57.6           |

Global Biostatistics: /by-sasp/patdb/projects/de04209/310442/stat/prod\_interim03/pgms/t-dm.sas epkl 07OCT2011 10:48  
 End of table

**Table 14.1.1 / 17: Ethnic group: Listing of specification for ethnic group 'Other' by treatment (FAS)**

TREATMENT: LCS12

| Subject number | Race other                      |
|----------------|---------------------------------|
| 120104         | SOUTH AMERICAN                  |
| 120117         | SOUTH AMERICAN                  |
| 120119         | SOUTH AMERICAN                  |
| 120127         | SOUTH AMERICAN                  |
| 120224         | SOUTH AMERICAN                  |
| 120304         | AMERICAN INDIAN                 |
| 120310         | AMERICAN INDIAN                 |
| 120312         | AMERICAN INDIAN                 |
| 120315         | AMERICAN INDIAN                 |
| 120320         | AMERICAN INDIAN                 |
| 120321         | AMERICAN INDIAN                 |
| 120322         | AMERICAN INDIAN                 |
| 120323         | AMERICAN INDIAN                 |
| 120326         | AMERICAN INDIAN                 |
| 120330         | AMERICAN INDIAN                 |
| 120335         | AMERICAN INDIAN                 |
| 141004         | ITALIAN                         |
| 141109         | CAUCASIAN BLACK(25%)            |
| 141402         | SPANISH                         |
| 141403         | METIS                           |
| 141405         | ABORIGINAL                      |
| 141419         | CAUCASIAN / BLACK               |
| 200101         | MEDITERANIAN                    |
| 200516         | MEDITERANIAN                    |
| 200611         | 50% CAUCASIAN, 50% ASIAN        |
| 200615         | 50% CAUCASIAN 50% ASIAN         |
| 240209         | NATIVE AMERICAN CHEROKCE INDIAN |
| 240606         | FILIPINO                        |
| 240701         | PACIFIC ISLAND                  |
| 241154         | ALASKAN NATIVE                  |
| 241307         | PACIFIC ISLANDER                |
| 241536         | BI - RACIAL ASIAN / CAUCASIAN   |
| 242204         | FILIPINO                        |
| 243311         | PACIFIC ISLANDIER               |
| 243609         | HISPANIC / NATIVE AMERICAN      |
| 243611         | AMERICAN INDIAN / HISPANIC      |
| 244425         | CAUCASIAN AND BLACK             |
| 245520         | ASSRIYON                        |
| 246150         | JAMAICAN/CAUCASIAN              |

Table 14.1.1 / 17: Ethnic group: Listing of specification for ethnic group 'Other' by treatment (FAS) (cont.)

TREATMENT: LCS16

| Subject number | Race other                                      |
|----------------|-------------------------------------------------|
| 120101         | SOUT AMERICAN                                   |
| 120102         | SOUTH AMERICAN.                                 |
| 120103         | SOUTH AMERICAN.                                 |
| 120118         | SOUTH AMERICAN                                  |
| 120302         | AMERICAN INDIAN                                 |
| 120303         | AMERICAN INDIAN                                 |
| 120306         | AMERICAN INDIAN                                 |
| 120308         | AMERICAN INDIAN                                 |
| 120309         | AMERICAN INDIAN                                 |
| 120311         | AMERICAN INDIAN                                 |
| 120313         | AMERICAN INDIAN                                 |
| 120317         | AMERICAN INDIAN                                 |
| 120318         | AMERICAN INDIAN                                 |
| 120319         | AMERICAN INDIAN                                 |
| 120324         | AMERICAN INDIAN                                 |
| 120325         | AMERICAN INDIAN                                 |
| 120328         | AMERICAN INDIAN                                 |
| 120333         | AMERICAN INDIAN                                 |
| 120336         | AMERICAN INDIAN                                 |
| 120337         | AMERICAN INDIAN                                 |
| 141414         | METIS                                           |
| 141415         | ENGLISH, RUSSIAN, METIS GERMAN, IRISH, SCOTTISH |
| 200632         | 1 PARENT IS CAUCASIAN AND 1 PARENT IS ASIAN     |
| 240128         | PACIFIC ISLANDER                                |
| 240618         | ASIAN ' CAUCASIAN                               |
| 240907         | ROMANIAN                                        |
| 241206         | BAHAMIAN                                        |
| 241519         | MULTI                                           |
| 242211         | FILIPINO                                        |
| 242303         | EGYPTIAN                                        |
| 242306         | BRAZILIAN                                       |
| 242321         | CAUCASIAN / WEST AFRICAN                        |
| 243808         | CREOLE                                          |
| 243923         | LATINO                                          |
| 244433         | CAUCASIAN AND HISPANIC                          |
| 244516         | HISPANIC / CAUCASIAN                            |
| 244916         | HISPANIC & ASIAN + NATIVE AMERICAN              |
| 244926         | BOTH CAUCASIAN AND HISPANIC                     |

Global Biostatistics: /by-sasp/patdb/projects/de04209/310442/stat/prod\_interim03/pgms/t-dm.sas epkl 07OCT2011 10:48

End of table



**Table 14.1.1 / 18: Number of subjects by age group and treatment (FAS)**

|                    | LCS12 (N=1432) | LCS16 (N=1452) | Total (N=2884) |
|--------------------|----------------|----------------|----------------|
| Number of subjects | 1432 (100.0%)  | 1452 (100.0%)  | 2884 (100.0%)  |
| Age category       |                |                |                |
| age <= 25          | 566 ( 39.5%)   | 564 ( 38.8%)   | 1130 ( 39.2%)  |
| 25 < age <= 35     | 866 ( 60.5%)   | 888 ( 61.2%)   | 1754 ( 60.8%)  |

Global Biostatistics: /by-sasp/patdb/projects/de04209/310442/stat/prod\_interim03/pgms/t-dm.sas epkl 07OCT2011 10:48

End of table

**Table 14.1.1 / 19: Education level by treatment (FAS)**

|                                      | LCS12         | LCS16         | Total         |
|--------------------------------------|---------------|---------------|---------------|
| Number of subjects                   | 1007 (100.0%) | 1030 (100.0%) | 2037 (100.0%) |
| Educational level                    |               |               |               |
| some elementary education            | 37 ( 3.7%)    | 34 ( 3.3%)    | 71 ( 3.5%)    |
| some secondary education             | 291 ( 28.9%)  | 315 ( 30.6%)  | 606 ( 29.7%)  |
| some college or university education | 679 ( 67.4%)  | 681 ( 66.1%)  | 1360 ( 66.8%) |

Data only collected after Amendment 3 to study protocol

Global Biostatistics: /by-sasp/patdb/projects/de04209/310442/stat/prod\_interim03/pgms/t-dm.sas epkl 07OCT2011 10:48

End of table

**Table 14.1.1 / 20: Sexual relation/activity at screening by treatment (FAS)**

|                           | LCS12         | LCS16         | Total         |
|---------------------------|---------------|---------------|---------------|
| Number of subjects        | 1432 (100.0%) | 1452 (100.0%) | 2884 (100.0%) |
| Sexual relations/activity |               |               |               |
| no                        | 16 ( 1.1%)    | 17 ( 1.2%)    | 33 ( 1.1%)    |
| yes                       | 1416 ( 98.9%) | 1435 ( 98.8%) | 2851 ( 98.9%) |

Global Biostatistics: /by-sasp/patdb/projects/de04209/310442/stat/prod\_interim03/pgms/t-dm.sas epkl 07OCT2011 10:48

End of table

**Table 14.1.1 / 21: Number of subjects currently smoking by treatment (FAS)**

|                    | LCS12         | LCS16         | Total         |
|--------------------|---------------|---------------|---------------|
| Number of subjects | 1432 (100.0%) | 1452 (100.0%) | 2884 (100.0%) |
| Still smoking      |               |               |               |
| no                 | 1098 ( 76.7%) | 1092 ( 75.2%) | 2190 ( 75.9%) |
| yes                | 334 ( 23.3%)  | 360 ( 24.8%)  | 694 ( 24.1%)  |

Global Biostatistics: /by-sasp/patdb/projects/de04209/310442/stat/prod\_interim03/pgms/t-dm.sas epkll 07OCT2011 10:48

End of table

**Table 14.1.1 / 22: Average number of cigarettes smoked per day in subjects who are currently smoking by treatment (FAS)**

|                      | TREATMENT | n   | Nmiss | Mean | SD  | Min | Q1  | Median | Q3   | Max |
|----------------------|-----------|-----|-------|------|-----|-----|-----|--------|------|-----|
| No of cigarettes/day | LCS12     | 323 | 11    | 7.8  | 5.6 | 0   | 3.0 | 7.0    | 10.0 | 30  |
|                      | LCS16     | 339 | 21    | 7.9  | 5.9 | 0   | 3.0 | 6.0    | 10.0 | 25  |
|                      | Total     | 662 | 32    | 7.9  | 5.8 | 0   | 3.0 | 7.0    | 10.0 | 30  |

Global Biostatistics: /by-sasp/patdb/projects/de04209/310442/stat/prod\_interim03/pgms/t-dm.sas epkl 07OCT2011 10:48  
 End of table

**Table 14.1.1 / 23: Subjects with other smoking habits by treatment (FAS)**

TREATMENT: LCS12

| Subject number | Still smoking | No of cigarettes/day | Smoking habits text                |
|----------------|---------------|----------------------|------------------------------------|
| 140105         | yes           | 5                    | MARIJUANA 1 TIME/MONTH             |
| 141101         | yes           | 12                   | NONE                               |
| 141409         | no            | .                    | QUIT 3 WEEKS AGO 7 CIG/DAY         |
| 150138         | yes           | 1                    | NO                                 |
| 161215         | no            | .                    | HAVE FINISHED ONE MONTH AGO        |
| 161514         | yes           | .                    | SELDOM                             |
| 161525         | yes           | .                    | OCCASIONALLY                       |
| 170901         | yes           | 1                    | 5 CIGARETTES/WEEK -                |
| 190403         | yes           | 1                    | 1/WEEK                             |
| 200601         | yes           | 20                   | MARIHUANA, INCIDENTAL              |
| 200613         | yes           | .                    | JOINT. ONCE/WEEK.                  |
| 200624         | yes           | 20                   | JOINT 1 DAILY                      |
| 200625         | yes           | 5                    | WEED, ONE/14 DAYS.                 |
| 200634         | yes           | 2                    | HASH. 1/3MONTHS.                   |
| 200709         | yes           | 10                   | NO                                 |
| 200710         | yes           | 6                    | NO                                 |
| 200911         | yes           | 8                    | CANNABIS (ONCE IN 3 MONTHS)        |
| 210412         | yes           | .                    | OCCASIONAL SMOKER                  |
| 230406         | yes           | .                    | SNUFF                              |
| 230512         | yes           | .                    | 3 CIGARETTES/WEEK                  |
| 230615         | no            | .                    | SNUFF OCCASIONALLY                 |
| 230702         | yes           | .                    | PARTY SMOKER                       |
| 230816         | yes           | 2                    | NOT EVERY DAY, TRIES TO QUIT       |
| 231005         | yes           | 2                    | PARTY SMOKING.                     |
| 231102         | yes           | 3                    | SNUFF "CATCH - MINI" 5 - 6 PER DAY |
| 240104         | yes           | 1                    | NONE                               |
| 240115         | yes           | 1                    | NONE                               |
| 240123         | yes           | 1                    | NONE                               |
| 240131         | no            | .                    | NONE                               |
| 240132         | no            | .                    | NONE                               |
| 240135         | no            | .                    | NONE                               |
| 240719         | yes           | .                    | 1-2 CIGARETTES PER MONTH           |
| 240736         | yes           | .                    | SMOKES 1-2 CIGARETTES PER WEEK     |
| 240826         | yes           | 1                    | SOCIAL SMOKER                      |
| 241231         | yes           | .                    | 1 TO 2 CIGARETTES OVER A WEEKEND.  |
| 241530         | yes           | 15                   | NO                                 |
| 241547         | yes           | .                    | 4 CIGARS PER WEEK                  |
| 241807         | yes           | 6                    | NO                                 |
| 242103         | yes           | 2                    | NONE                               |
| 243327         | yes           | 4                    | NONE                               |
| 243806         | yes           | 0                    | 1 CIGAR EVERY 14 DAYS              |
| 243938         | no            | .                    | NONE                               |
| 243939         | no            | .                    | NONE                               |
| 243946         | no            | .                    | NONE                               |
| 243948         | no            | .                    | NONE                               |

**Table 14.1.1 / 23: Subjects with other smoking habits by treatment (FAS)**

TREATMENT: LCS12

| Subject number | Still smoking | No of cigarettes/day | Smoking habits text                        |
|----------------|---------------|----------------------|--------------------------------------------|
| 243950         | yes           | 10                   | NO                                         |
| 243962         | no            | .                    | NONE                                       |
| 243968         | no            | .                    | NONE                                       |
| 243969         | no            | .                    | NONE                                       |
| 243972         | no            | .                    | NONE                                       |
| 244412         | yes           | 2                    | 2 PACKS PER DAY                            |
| 244427         | yes           | 20                   | ONE PACK PER DAY                           |
| 244442         | no            | .                    | PREVIOUS SMOKER - STOP DATE 2006           |
| 244710         | no            | .                    | NONE                                       |
| 244711         | yes           | 10                   | NONE                                       |
| 244717         | yes           | 5                    | NONE                                       |
| 245528         | yes           | 1                    | SMOKES MAY BE 1 CIGARETTE EVERY 3-4 MONTHS |

Global Biostatistics: /by-sasp/patdb/projects/de04209/310442/stat/prod\_interim03/pgms/t-dm.sas epkl 07OCT2011 10:48

Table 14.1.1 / 23: Subjects with other smoking habits by treatment (FAS) (cont.)

TREATMENT: LCS16

| Subject number | Still smoking | No of cigarettes/day | Smoking habits text                 |
|----------------|---------------|----------------------|-------------------------------------|
| 140201         | yes           | 2                    | N/A                                 |
| 140203         | yes           | 12                   | N/A                                 |
| 140509         | yes           | 1                    | 1 CIG .12 WEEKS X 4 YEARS           |
| 150116         | yes           | 3                    | NO                                  |
| 150118         | yes           | 6                    | NONE                                |
| 150120         | yes           | 1                    | NO                                  |
| 150141         | yes           | 2                    | NONE                                |
| 160204         | yes           | 0                    | 5/MONTH                             |
| 160417         | yes           | .                    | ONCE A WEEK, NOT DAILY              |
| 160501         | yes           | .                    | ONCE A MONTH                        |
| 160532         | yes           | .                    | 2 CIGARETTES A WEEK                 |
| 160543         | yes           | .                    | TWO TIMES IN A YEAR                 |
| 160545         | yes           | .                    | 1 CIGARETTE IN MONTH                |
| 161213         | yes           | 1                    | OCCASIONALLY                        |
| 180633         | yes           | .                    | SELDOM                              |
| 190142         | yes           | .                    | 1 EVERY WEEK                        |
| 200306         | yes           | .                    | SMOKES MARIHUANA                    |
| 200711         | yes           | 25                   | NO                                  |
| 210110         | yes           | .                    | SHE SMOKE ONLY ON PARTY             |
| 210122         | yes           | 1                    | PARTY SMOKER                        |
| 210601         | yes           | .                    | PARTY SMOKER                        |
| 210605         | yes           | .                    | 8 PR. MONTH                         |
| 230309         | yes           | .                    | PARTY SMOKER, 6 CIGARRETTES / WEEK. |
| 230404         | yes           | .                    | SNUFF (3"BOXES"/WEEK)               |
| 230415         | yes           | .                    | SNUFF 1 BOX PER MONTH.              |
| 230416         | yes           | .                    | SNUFF 3 BOXES/WEEK                  |
| 230601         | yes           | .                    | SNUFF 6 TIMES DAILY                 |
| 230609         | yes           | .                    | SNUFFS ONE SNUFF EACH DAY           |
| 230815         | yes           | .                    | BUT SELDOM                          |
| 230822         | yes           | 3                    | TRY TO STOP SMOKE                   |
| 240103         | no            | .                    | NONE                                |
| 240106         | yes           | 2                    | NONE                                |
| 240113         | yes           | 7                    | NONE                                |
| 240117         | no            | .                    | NONE                                |
| 240118         | yes           | 15                   | NONE                                |
| 240126         | no            | .                    | NONE                                |
| 240127         | no            | .                    | NONE                                |
| 240128         | no            | .                    | NONE                                |
| 240133         | no            | .                    | NONE                                |
| 240603         | yes           | .                    | SOCIAL, WEEKENDS 1-2 WK             |
| 240620         | yes           | 10                   | NOT EVERY DAY, 10 MAXIMUM           |
| 240624         | yes           | .                    | 1-2X/WEEK                           |
| 243223         | yes           | 10                   | NONE                                |
| 243902         | yes           | 3                    | 0                                   |
| 243936         | no            | .                    | NONE                                |



Table 14.1.1 / 23: Subjects with other smoking habits by treatment (FAS) (cont.)

TREATMENT: LCS16

| Subject number | Still smoking | No of cigarettes/day | Smoking habits text       |
|----------------|---------------|----------------------|---------------------------|
| 243937         | yes           | 1                    | NONE                      |
| 243949         | no            | .                    | NONE                      |
| 243954         | yes           | 10                   | NONE                      |
| 243957         | no            | .                    | NONE                      |
| 243960         | no            | .                    | NONE                      |
| 243963         | no            | .                    | NONE                      |
| 243966         | yes           | 10                   | NONE                      |
| 243967         | yes           | 2                    | NONE                      |
| 243975         | yes           | 20                   | NO                        |
| 243976         | no            | .                    | NONE                      |
| 244420         | yes           | 20                   | 1 PACK PER DAY            |
| 244933         | yes           | .                    | MARIJUANA 2 TIMES A MONTH |

Global Biostatistics: /by-sasp/patdb/projects/de04209/310442/stat/prod\_interim03/pgms/t-dm.sas epkl 07OCT2011 10:48

End of table

**Table 14.1.1 / 24: Number of subjects with alcohol consumption by treatment (FAS)**

|                    | LCS12         | LCS16         | Total         |
|--------------------|---------------|---------------|---------------|
| Number of subjects | 1432 (100.0%) | 1452 (100.0%) | 2884 (100.0%) |
| Alcohol frequency  |               |               |               |
| never              | 315 ( 22.0%)  | 317 ( 21.8%)  | 632 ( 21.9%)  |
| seldom             | 521 ( 36.4%)  | 503 ( 34.6%)  | 1024 ( 35.5%) |
| occasionally       | 546 ( 38.1%)  | 576 ( 39.7%)  | 1122 ( 38.9%) |
| regularly          | 50 (  3.5%)   | 56 (  3.9%)   | 106 (  3.7%)  |

Global Biostatistics: /by-sasp/patdb/projects/de04209/310442/stat/prod\_interim03/pgms/t-dm.sas epkl 07OCT2011 10:48

End of table

**Table 14.1.1 / 25: Listing of subjects with comments about alcohol consumption by treatment (FAS)**

| Subject number | Alcohol frequency | Alcohol details                  |
|----------------|-------------------|----------------------------------|
| 140101         | occasionally      | 3 - 7/WEEK                       |
| 140103         | occasionally      | 4 BEERS / WEEK                   |
| 140105         | occasionally      | 1 1/2 WINE BOTTLE PER WEEK       |
| 140106         | occasionally      | 6 BEERS ON WEEK-END              |
| 140110         | seldom            | 1 GLASS OF WINE/MONTH            |
| 140113         | regularly         | 10-15 CONSUMPTIONS/2WEEKS        |
| 140114         | seldom            | 1 CONSUMPTION / WEEK             |
| 140116         | seldom            | 1-2 CONSUMPTIONS / MONTH         |
| 140117         | seldom            | 2 CONSUMPTIONS / WEEK            |
| 140118         | seldom            | 1 CONSUMPTION / WEEK             |
| 140119         | seldom            | 1 BEER / MONTH                   |
| 140120         | occasionally      | 7-8 CONSUMPTIONS/WEEK            |
| 140201         | regularly         | 02 PER WEEK                      |
| 140202         | occasionally      | ONE PER MONTH                    |
| 140203         | occasionally      | 1 PER WEEK                       |
| 140206         | occasionally      | 2 PER WEEK                       |
| 140207         | seldom            | 1 PER 3 MONTHS                   |
| 140208         | seldom            | 1 PER TWO MONTH                  |
| 140210         | regularly         | 2 PER WEEK                       |
| 140211         | regularly         | 4 PER WEEK                       |
| 140212         | occasionally      | 1 PER WEEK                       |
| 140214         | occasionally      | 4 PER WEEK                       |
| 140215         | seldom            | 2 PER MONTH                      |
| 140216         | seldom            | 4 PER MONTH                      |
| 140218         | seldom            | 4 PER YEAR                       |
| 140219         | occasionally      | 4 PER WEEK                       |
| 140220         | occasionally      | 4 PER WEEK                       |
| 140221         | regularly         | 7 PER WEEK                       |
| 140222         | seldom            | 1 PER MONTH                      |
| 140223         | occasionally      | 3 PER WEEK.                      |
| 140224         | occasionally      | 1 PER WEEK                       |
| 140225         | occasionally      | 3 PER WEEK                       |
| 140227         | seldom            | 1 PER MONTH                      |
| 140228         | regularly         | 7 PER WEEK                       |
| 140229         | regularly         | 7 PER WEEK                       |
| 140301         | occasionally      | 2 GLASSES PER MONTH              |
| 140302         | regularly         | 3-4 DRINKS/WEEK                  |
| 140304         | regularly         | 2-3 GLASSES/WEEK                 |
| 140506         | occasionally      | 3-4 GLASSES OF WINE PER WEEK.    |
| 140507         | occasionally      | 2 GLASS OF WINE / WEEK           |
| 140509         | occasionally      | 3 OR 4 BEERS A WEEK              |
| 140514         | occasionally      | APPROXIMATELY 6 BEERS A MONTH    |
| 140518         | regularly         | 3-4 GLASSES OF WINE 3 TIMES/WEEK |
| 140519         | occasionally      | ONCE A WEEK                      |
| 140520         | seldom            | 2-3 TIMES/YEAR                   |
| 140521         | regularly         | EVERY WEEKENDS                   |

**Table 14.1.1 / 25: Listing of subjects with comments about alcohol consumption by treatment (FAS)**

| Subject number | Alcohol frequency | Alcohol details            |
|----------------|-------------------|----------------------------|
| 140523         | regularly         | 3-4 BEERS A WEEK           |
| 140526         | occasionally      | 3 BEERS A WEEK             |
| 140529         | seldom            | DURING HOLIDAYS            |
| 140916         | regularly         | 1 GLASS WINE PER DAY       |
| 141002         | occasionally      | 3 DRINKS PER WEEK          |
| 141005         | regularly         | 2 DRINKS/WEEK              |
| 141006         | regularly         | 2 DRINKS / WEEK            |
| 141011         | regularly         | 5-6 DRINKS/WEEK            |
| 141012         | occasionally      | 1-2 DRINKS/WEEK            |
| 141013         | regularly         | 2-3 DRINKS/WEEK            |
| 141014         | occasionally      | 2 DRINKS / WEEK            |
| 141016         | occasionally      | 2 DRINKS PER WEEK OR LESS  |
| 141018         | regularly         | 2 DRINKS / WEEK            |
| 141020         | regularly         | 5 DRINKS / WEEK            |
| 141022         | occasionally      | 2 DRINKS / WEEK            |
| 141023         | regularly         | 6 DRINKS / WEEK            |
| 141025         | occasionally      | 2 DRINKS PER WEEK          |
| 141028         | occasionally      | 3 DRINKS PER WEEK          |
| 141030         | seldom            | 1 DRINK PER MONTH          |
| 141032         | occasionally      | 1 DRINK / WEEK             |
| 141401         | occasionally      | 6/MONTH                    |
| 141405         | occasionally      | 1/WEEK                     |
| 141407         | occasionally      | 2 / WEEK                   |
| 141410         | occasionally      | 2 DRINKS PER MONTH         |
| 141411         | occasionally      | 2 PER MONTH                |
| 141413         | occasionally      | 2 PER MONTH                |
| 141414         | occasionally      | 2/MONTH                    |
| 141419         | occasionally      | 12/MONTH                   |
| 141420         | seldom            | 1 EVERY 2 MONTHS OR LESS   |
| 141421         | seldom            | 1/YEAR                     |
| 141423         | occasionally      | 1-2 PER MONTH              |
| 141426         | occasionally      | 1 PER WEEK                 |
| 150101         | occasionally      | 1 TIME IN MONTH            |
| 150102         | occasionally      | 2 TIMES ON THE MONTH       |
| 150103         | occasionally      | 2 TIMES ON THE MONTH       |
| 150104         | occasionally      | 1 PER WEEK                 |
| 150108         | occasionally      | 2 TIMES ON THE MOUTH       |
| 150109         | occasionally      | 1 TIME EVERY THREE MONTHS. |
| 150110         | occasionally      | ONE DRINKS PER MONTH       |
| 150111         | seldom            | 1 DRINK PER MONTH          |
| 150112         | occasionally      | 1 TIME EVERY ONE MONTH     |
| 150113         | occasionally      | 2 TIMES EVERY 1 MONTH      |
| 150115         | occasionally      | 1 DRINK PER MONTH          |
| 150116         | occasionally      | 1 TIMES FOR MONTH          |
| 150117         | occasionally      | 1 DRINK PER WEEK           |
| 150118         | occasionally      | 2 DRINKS PER WEEK          |

**Table 14.1.1 / 25: Listing of subjects with comments about alcohol consumption by treatment (FAS)**

| Subject number | Alcohol frequency | Alcohol details                         |
|----------------|-------------------|-----------------------------------------|
| 150119         | occasionally      | 1 PER MONTH                             |
| 150120         | occasionally      | 2 DRINKS PER WEEK                       |
| 150121         | occasionally      | 2 TIMES ON THE MONTH                    |
| 150123         | occasionally      | TWO DRINKS PER MONTHS                   |
| 150126         | occasionally      | ONE DRINKS PER WEEK.                    |
| 150136         | occasionally      | 1 DRINK FOR MONTH                       |
| 150137         | occasionally      | 1 DRINK ON MONTH                        |
| 150139         | occasionally      | EACH 6 MONTHS                           |
| 150140         | occasionally      | 2 PER WEEK .                            |
| 150142         | occasionally      | 1 DRINKS PER WEEK                       |
| 150143         | occasionally      | 1 DRINKO PER MONTH                      |
| 150145         | occasionally      | 1 PER MONTH.                            |
| 150146         | occasionally      | 1 PER WEEK                              |
| 150147         | occasionally      | 2 PER MONTH.                            |
| 150149         | occasionally      | 2 PER WEEK.                             |
| 150150         | occasionally      | 1 PER MONTH.                            |
| 150151         | occasionally      | 1 PER MONTH.                            |
| 150153         | occasionally      | 2 PER MONTH.                            |
| 150154         | occasionally      | 1 PER MONTH.                            |
| 150155         | occasionally      | 2 PER MONTH.                            |
| 150156         | occasionally      | 3 TIMES FOR MONTH                       |
| 150157         | seldom            | EACH 6 MONTHS                           |
| 150159         | occasionally      | 1 DRINK PER WEEK                        |
| 150160         | occasionally      | 1 DRINK FOR MONTH                       |
| 150161         | occasionally      | 1 DRINK PER WEEK                        |
| 150162         | occasionally      | 1 PER MONTH                             |
| 150165         | occasionally      | 2 PER WEEK                              |
| 150167         | occasionally      | 2 TIMES ON THE MONTH                    |
| 150168         | occasionally      | 1 PER MONTH                             |
| 160602         | occasionally      | ABOUT ONCE A WEEK                       |
| 160613         | occasionally      | 2-3 AMOUNT/WEEK                         |
| 160620         | regularly         | ONE GLASS OF WINE ONCE A WEEK           |
| 160633         | occasionally      | 5 AMOUNT/ WEEK                          |
| 160709         | occasionally      | 2-3 GLASSES OF WINE PER WEEK            |
| 160720         | occasionally      | TWO GLASSES OF WINE PER WEEK            |
| 160749         | occasionally      | 2 GLASSES OF WINE PER WEEK              |
| 160750         | occasionally      | TWO BOTTLES OF WINE PER MONTH           |
| 160752         | seldom            | TWO GLASSES OF WINE IN ABOUT TWO MONTHS |
| 160754         | occasionally      | 2 GLASSES OF WINE PER WEEK              |
| 160757         | occasionally      | 4 GLASSES OF WINE PER WEEK              |
| 160760         | occasionally      | ABOUT 5 PORTIONS A WEEK                 |
| 160803         | regularly         | TWICE A MONTH, 7 DRINKS PER TIME        |
| 160806         | seldom            | ONCE A MONTH OR LESS                    |
| 160915         | occasionally      | 2 DOSES / WEEK                          |
| 160927         | occasionally      | 4 DOSES / WEEK                          |
| 160940         | occasionally      | 3-4 DOSES/WEEK                          |

**Table 14.1.1 / 25: Listing of subjects with comments about alcohol consumption by treatment (FAS)**

| Subject number | Alcohol frequency | Alcohol details                                             |
|----------------|-------------------|-------------------------------------------------------------|
| 160941         | occasionally      | 1 DOSE/WEEK                                                 |
| 160950         | occasionally      | 10 DOSES / WEEK                                             |
| 160971         | occasionally      | 7-8 DOSES/WEEK                                              |
| 190604         | occasionally      | 3 BEERS ON WEEKENDS                                         |
| 190622         | seldom            | SOCIALLY                                                    |
| 190629         | occasionally      | SOCIALLY ON WEEKENDS MAX. 2 DRINKS PER WEEKEND              |
| 230614         | regularly         | AVERAGE TWO GLASSES PER WEEK                                |
| 230707         | regularly         | "STUDENT LIFE"                                              |
| 240103         | occasionally      | BEER AND WINES DURING WEEKENDS                              |
| 240104         | occasionally      | 2 BEERS A MONTH                                             |
| 240106         | seldom            | 1 MIXED COCKTAIL 2 TIMES A MONTH                            |
| 240107         | seldom            | 6 WINE COOLERS EVERY 6 MONTHS                               |
| 240110         | seldom            | WINE AND/OR LIQUOR 2 TIMES A WEEK                           |
| 240112         | seldom            | 5 BEERS EVERY OTHER WEEK                                    |
| 240113         | occasionally      | 3 BEERS 2 TIMES A WEEK                                      |
| 240115         | seldom            | 1 BEER A WEEK                                               |
| 240116         | seldom            | 3 BEERS A WEEK                                              |
| 240118         | seldom            | 2 BEERS A WEEK                                              |
| 240123         | occasionally      | 2 BEERS OR 2 GLASSES OF WINE PER WEEK                       |
| 240127         | occasionally      | 3 BOTTLES OF BEER AND / OR 2 OZ LIQUOR EVERY 2 WEEKS.       |
| 240128         | seldom            | 2 OZ LIQUOR EVERY 2 MONTHS                                  |
| 240132         | seldom            | 1 MARGARITA EVERY 3 MONTHS                                  |
| 240133         | occasionally      | 2 GLASSES OF WINE, 2 BEERS, OR 2OZ OF LIQUOR 2 TIMES A WEEK |
| 240135         | seldom            | 1 WINE COOLER A MONTH                                       |
| 240201         | regularly         | 3 GLASSES OF WINE PER WEEK                                  |
| 240205         | regularly         | 3 DRINKS PER WEEK                                           |
| 240208         | regularly         | 5 DRINKS PER WEEK                                           |
| 240209         | occasionally      | 1 DRINK PER MONTH                                           |
| 240211         | regularly         | 3 DRINKS PER WEEK                                           |
| 240221         | occasionally      | ONE GLASS PER WEEK                                          |
| 240223         | occasionally      | 2 DRINKS PER WEEK                                           |
| 240224         | occasionally      | 2 DRINKS PER WEEK                                           |
| 240230         | occasionally      | 1 PER MONTH                                                 |
| 240235         | occasionally      | 2 PER MONTH                                                 |
| 240240         | seldom            | ONE DRINK EVERY 3 MONTHS                                    |
| 240315         | regularly         | ONCE A WEEK                                                 |
| 240330         | regularly         | ONCE A WEEK                                                 |
| 240363         | regularly         | TWICE A WEEK                                                |
| 240401         | occasionally      | 1 GLASS OF WINE 2 TIMES/WEAK                                |
| 240704         | regularly         | BEER ON WEEKENDS                                            |
| 240807         | occasionally      | WEEKENDS ONLY                                               |
| 240901         | regularly         | 1 DRINK PER NIGHT                                           |
| 240903         | seldom            | 1 DRINK TWICE PER YEAR                                      |
| 240904         | occasionally      | 1 DRINK PER MONTH                                           |
| 240905         | occasionally      | 1 DRINK PER MONTH                                           |
| 240906         | regularly         | ONE DRINK PER WEEK                                          |

**Table 14.1.1 / 25: Listing of subjects with comments about alcohol consumption by treatment (FAS)**

| Subject number | Alcohol frequency | Alcohol details                               |
|----------------|-------------------|-----------------------------------------------|
| 241131         | occasionally      | X1 WK                                         |
| 241203         | occasionally      | SOCIAL DRINKER                                |
| 241204         | occasionally      | SOCIAL DRINKER                                |
| 241237         | regularly         | 1 GLASS OF WINE EVERY DAY                     |
| 241305         | occasionally      | 1 GLASS WINE 4X/WK                            |
| 241307         | seldom            | ~ 1X / MONTH                                  |
| 241504         | seldom            | 2 PER YEAR                                    |
| 241519         | seldom            | 1 BEER A MONTH                                |
| 241533         | occasionally      | TWO DRINKS OF WINE PER MONTH                  |
| 241536         | occasionally      | ONE TO TWO BEERS OR WINE A WEEK.              |
| 241801         | occasionally      | SOMETIMES 2 DRINKS/WEEK                       |
| 241802         | occasionally      | 1-2 BOTTLES OF A BEER OR 2 GLASSES OF WINE/WK |
| 241807         | occasionally      | 4 BEERS / 2WKS                                |
| 241809         | occasionally      | 2 GLASSES OF WINE / WEEK                      |
| 241811         | occasionally      | 1 BEER/WK                                     |
| 242208         | seldom            | 2/WEEK                                        |
| 242211         | seldom            | 1/WEEK                                        |
| 242212         | regularly         | 4-6 / WEEK                                    |
| 242213         | occasionally      | 4 / WEEK                                      |
| 242215         | regularly         | 3/WEEK                                        |
| 242216         | seldom            | 1 / WK                                        |
| 242218         | occasionally      | 2/WEEK                                        |
| 242219         | occasionally      | 4 / WEEK                                      |
| 242223         | occasionally      | 2/WEEK                                        |
| 242224         | occasionally      | 3/WEEK                                        |
| 242225         | occasionally      | 2/WEEK                                        |
| 242227         | seldom            | 1/WEEK                                        |
| 242228         | occasionally      | 2/WEEK                                        |
| 242320         | occasionally      | SOCIALLY EVERY NOW AND THEN                   |
| 242321         | occasionally      | A GLASS OF WINE ONCE A MONTH APPROXIMATELY.   |
| 242324         | seldom            | 1-2 DRINKS PER MONTH                          |
| 242326         | seldom            | SPECIAL OCCASIONS ONLY                        |
| 243002         | seldom            | SOCIAL                                        |
| 243006         | occasionally      | SOCIAL                                        |
| 243015         | occasionally      | WINE OR BEER                                  |
| 243022         | occasionally      | WEEKENDS                                      |
| 243023         | seldom            | SOCIALLY                                      |
| 243025         | occasionally      | SOCIALLY 3 X PER WEEK                         |
| 243026         | seldom            | SOCIALLY                                      |
| 243030         | seldom            | SOCIAL                                        |
| 243101         | occasionally      | < 1 PER WEEK                                  |
| 243122         | occasionally      | 1/WK                                          |
| 243125         | occasionally      | <1 PER WEEK                                   |
| 243303         | occasionally      | BEER ON WEEKENDS                              |
| 243402         | occasionally      | 0-4 A WEEK                                    |
| 243403         | occasionally      | 2 DRINKS A WEEK                               |

**Table 14.1.1 / 25: Listing of subjects with comments about alcohol consumption by treatment (FAS)**

| Subject number | Alcohol frequency | Alcohol details            |
|----------------|-------------------|----------------------------|
| 243406         | seldom            | TWICE A MONTH              |
| 243606         | occasionally      | 0-2 PER WK                 |
| 243609         | seldom            | 0~1 / WK                   |
| 243611         | seldom            | 1-2 / WK                   |
| 243616         | seldom            | SPECIAL OCCASIONS          |
| 243618         | seldom            | 0-1 UNITS PER WEEK         |
| 243702         | occasionally      | 4 DRINKS PER MONTH         |
| 243703         | occasionally      | 1 DRINK PER MONTH          |
| 243709         | occasionally      | 2 DRINKS PER MONTH         |
| 243712         | occasionally      | 1 DRINK PER MONTH          |
| 243717         | occasionally      | 20 PER MONTH               |
| 243719         | occasionally      | 7 PER MONTH                |
| 243720         | occasionally      | 4 PER MONTH                |
| 243805         | occasionally      | 2 DRINKS EVERY 3 WEEKS     |
| 243806         | occasionally      | 2 DRINKS EVERY 14 DAYS     |
| 243807         | occasionally      | 1 DRINK EVERY 2 - 3 WEEKS  |
| 243808         | seldom            | CELEBRATIONS ONLY          |
| 243813         | occasionally      | 2 DRINKS PER MONTH         |
| 243819         | regularly         | 3 GLASSES PER WEEK         |
| 243820         | occasionally      | 1 DRINK PER WEEK           |
| 243822         | regularly         | 2 GLASSES OF WINE PER WEEK |
| 243823         | regularly         | 3 DRINKS PER WEEK          |
| 243824         | occasionally      | 1 GLASS WINE EVERY 2 WEEKS |
| 243826         | seldom            | AT HOLIDAYS 2-3 DRINKS     |
| 243829         | occasionally      | 2-3 DRINKS PER WEEKEND     |
| 243833         | seldom            | AT HOLIDAYS                |
| 243901         | seldom            | <1 DRINK / WK              |
| 243902         | seldom            | <1 PER WEEK                |
| 243904         | occasionally      | 1 DRINK/WEEK               |
| 243907         | occasionally      | 2-3 DRINKS/MO.             |
| 243909         | regularly         | 2-3 DRINKS / WEEK          |
| 243910         | occasionally      | 2/WK.                      |
| 243911         | regularly         | 1-2 PER WEEK               |
| 243913         | seldom            | <1 PER WEEK                |
| 243914         | occasionally      | 3-4 PER WEEK               |
| 243916         | seldom            | 1/YEAR                     |
| 243918         | occasionally      | 2 PER WEEK                 |
| 243919         | occasionally      | 4 PER MONTH                |
| 243921         | occasionally      | 2 PER MONTH                |
| 243925         | regularly         | 10 GLASSES PER WEEK        |
| 243928         | seldom            | 1 PER WEEK                 |
| 243932         | regularly         | 7 GLASSES PER WEEK         |
| 243933         | occasionally      | 2 PER MONTH                |
| 243936         | seldom            | 1 PER MONTH                |
| 243937         | occasionally      | 1 PER MONTH                |
| 243939         | occasionally      | 3 PER WEEK                 |



**Table 14.1.1 / 25: Listing of subjects with comments about alcohol consumption by treatment (FAS)**

| Subject number | Alcohol frequency | Alcohol details               |
|----------------|-------------------|-------------------------------|
| 243941         | occasionally      | 2 PER MONTH                   |
| 243944         | seldom            | 4 PER YEAR                    |
| 243946         | seldom            | 4 PER YEAR                    |
| 243948         | occasionally      | 2 PER MONTH                   |
| 243949         | occasionally      | 1 PER WEEK                    |
| 243950         | occasionally      | 3 PER WEEK                    |
| 243952         | occasionally      | 1 PER WEEK                    |
| 243958         | regularly         | 7 PER WEEK                    |
| 243959         | occasionally      | 6 PER WEEK                    |
| 243962         | seldom            | 2 PER MONTH                   |
| 243964         | regularly         | 30 OZ PER WEEK                |
| 243965         | occasionally      | 2 PER WEEK                    |
| 243967         | occasionally      | 4 DRINKS PER WEEK             |
| 243968         | occasionally      | 24 OZ PER MONTH               |
| 243969         | regularly         | 30 OZ PER WEEK                |
| 243971         | occasionally      | 2 GLASSES WINE PER MONTH      |
| 243972         | occasionally      | 16 OZ PER MONTH               |
| 243975         | occasionally      | 24 OZ PER MONTH               |
| 243978         | occasionally      | 8 OZ PER MONTH                |
| 244002         | seldom            | ONE DRINK EVERY 6 MONTHS      |
| 244003         | seldom            | ONE WINE COOLER EVERY 2 WEEKS |
| 244006         | occasionally      | 1 - 2 BEERS A MONTH           |
| 244007         | occasionally      | 3-5 GLASSES OF WINE PER MONTH |
| 244008         | occasionally      | 1-2 GIN/TONIC                 |
| 244203         | occasionally      | SOCIALLY                      |
| 244302         | seldom            | EVERY FEW MONTHS              |
| 244305         | seldom            | 3 - 4 TIMES PER YEAR          |
| 244306         | occasionally      | SOCIALLY                      |
| 244309         | occasionally      | 2 BEERS A MONTH               |
| 244310         | occasionally      | ON WEEKENDS OCCASSIONALLY     |
| 244312         | occasionally      | ONCE A WEEK                   |
| 244401         | regularly         | 5 PER WEEK                    |
| 244402         | regularly         | 6 PER WEEK                    |
| 244403         | regularly         | 10 PER WEEK                   |
| 244405         | occasionally      | 4 DRINKS PER WEEK             |
| 244407         | regularly         | DRINKS PER WEEK ON AVERAGE 5  |
| 244408         | occasionally      | 5 DRINKS PER WEEK             |
| 244412         | occasionally      | 5 PER WEEK ON AVERAGE         |
| 244418         | occasionally      | 2 PER WEEK                    |
| 244420         | seldom            | LESS THAN 1 PR. WEEK          |
| 244424         | occasionally      | 3 PER WEEK                    |
| 244425         | occasionally      | 5-7 DRINKS PER WEEK           |
| 244428         | seldom            | 6 DRINKS PR WEEK              |
| 244429         | regularly         | 4-5 DRINKS PER WEEK           |
| 244433         | occasionally      | 1 DRINK PER WEEK ON AVERAGE   |
| 244435         | seldom            | 1 OR 2 DRINKS PER MONTH       |

**Table 14.1.1 / 25: Listing of subjects with comments about alcohol consumption by treatment (FAS)**

| Subject number | Alcohol frequency | Alcohol details                |
|----------------|-------------------|--------------------------------|
| 244437         | occasionally      | 1-2 DRINKS PER WEEK            |
| 244439         | occasionally      | 1 DRINK PER WEEK ON AVERAGE    |
| 244441         | occasionally      | 3 PER WEEK ON AVERAGE          |
| 244442         | occasionally      | 2 DRINKS PER WEEK              |
| 244446         | seldom            | 2 DRINKS PER WEEK ON AVERAGE   |
| 244447         | regularly         | 2-3 DRINKS PER WEEK            |
| 244449         | occasionally      | 5 DRINKS PER WEEK ON AVGERAGE  |
| 244450         | occasionally      | 7 DRINKS PER WEEK ON AVERAGE   |
| 244451         | regularly         | 4-5 DRINKS PER WEEK ON AVERAGE |
| 244503         | seldom            | ONCE / WEEK ON WEEKENDS        |
| 244504         | occasionally      | ONE OR TWO DRINKS A WEEK       |
| 244505         | occasionally      | 1-2 GLASSES OF WINE PER WEEK   |
| 244508         | occasionally      | APPROX 3 DRINKS A WEEK         |
| 244509         | regularly         | TWICE A WEEK                   |
| 244521         | regularly         | 3 DRINKS WEEK                  |
| 244701         | occasionally      | 2-3 DRINKS PER MONTH           |
| 244704         | occasionally      | 1 DRINK PER MONTH              |
| 244707         | seldom            | 1-2 DRINKS PER YEAR            |
| 244710         | occasionally      | 10 - 12 DRINKS PER MONTH       |
| 244711         | regularly         | 12 DRINKS PER WEEK             |
| 244714         | occasionally      | 3 DRINKS PER WEEK              |
| 244715         | occasionally      | 2 DRINKS PER WEEK              |
| 244716         | occasionally      | 3-4 DRINKS PER WEEK            |
| 244717         | occasionally      | 10 DRINKS PER WEEK             |
| 244802         | seldom            | ONE DRINK EVERY 3-4 MONTHS     |
| 244917         | occasionally      | ONCE A MONTH                   |
| 244918         | occasionally      | LESS THAN 3 PER WEEK           |
| 244922         | regularly         | 2-3 GLASSES WINE A WEEK        |
| 244926         | occasionally      | 5 DRINKS PER WEEK              |
| 244927         | occasionally      | 1 DRINK PER WEEK               |
| 244931         | regularly         | 2 DRINKS @ WEEK                |
| 244934         | regularly         | 8 DRINKS EACH WEEK             |
| 245001         | occasionally      | 4 BEER A WEEK                  |
| 245002         | seldom            | <1 GLASS OF WINE               |
| 245003         | occasionally      | 2 GLASSES OF WINE PER WEEK     |
| 245004         | seldom            | 0 CONSUMED PER WEEK            |
| 245009         | seldom            | 3 BEERS PER WEEK               |
| 245011         | occasionally      | <1 PER WEEK                    |
| 245013         | occasionally      | <1 AMOUNT CONSUMED PER WEEK    |
| 245014         | seldom            | <1 AMOUNT CONSUMED PER WEEK    |
| 245015         | occasionally      | <1 PER WEEK                    |
| 245016         | seldom            | <1 PER WEEK                    |
| 245018         | occasionally      | 1 PER MONTH                    |
| 245019         | seldom            | 1A MONTH CONSUMED              |
| 245020         | seldom            | 1 PER WEEK                     |
| 245021         | regularly         | 2 BEERS PER DAY                |

**Table 14.1.1 / 25: Listing of subjects with comments about alcohol consumption by treatment (FAS)**

| Subject number | Alcohol frequency | Alcohol details                  |
|----------------|-------------------|----------------------------------|
| 245022         | seldom            | <1 PER WEEK                      |
| 245024         | occasionally      | 8 BEERS A WEEK                   |
| 245026         | occasionally      | < 1 PER WEEK                     |
| 245027         | seldom            | <1 PER WEEK                      |
| 245028         | seldom            | <1 PER WEEK                      |
| 245029         | occasionally      | 4 DRINKS PER WEEK                |
| 245030         | seldom            | <1 PER WEEK                      |
| 245031         | occasionally      | 1 PER WEEK                       |
| 245032         | occasionally      | 4 PER WEEK                       |
| 245035         | occasionally      | 2-3 TIMES A WEEK                 |
| 245502         | seldom            | 0-1 DRINK PER WEEK SELDOM.       |
| 245505         | occasionally      | 1-2 PER WEEK.                    |
| 245507         | seldom            | 1 DRINK PER WEEK.                |
| 245508         | occasionally      | 2 DRINKS PER WEEK.               |
| 245516         | occasionally      | 2 DRINKS PER WEEK.               |
| 245518         | occasionally      | 2 DRINKS PER WEEK                |
| 245522         | occasionally      | 1 DRINK PER WEEK                 |
| 245524         | regularly         | 3 OR 4 DRINKS PER WEEK           |
| 245530         | occasionally      | 1-2 DRINKS PER WEEK.             |
| 245601         | occasionally      | SOCIAL                           |
| 245701         | occasionally      | 1-2 X 1 MONTH                    |
| 245704         | occasionally      | WEEKENDS                         |
| 245709         | occasionally      | 1-2/WK                           |
| 245801         | regularly         | TWO GLASSES OF WINE ON WEEKENDS. |
| 245802         | occasionally      | SOCIAL                           |
| 245807         | regularly         | SOCIALLY ON WEEKENDS             |
| 245808         | occasionally      | SOCIALLY                         |

Global Biostatistics: /by-sasp/patdb/projects/de04209/310442/stat/prod\_interim03/pgms/t-dm.sas epkl 07OCT2011 10:48  
End of table

**Table 14.1.1 / 26: Number of subjects with medical history findings by primary system organ class, high level term, preferred term by treatment (FAS)**

| Primary system organ class                                       | LCS12         | LCS16         | Total         |
|------------------------------------------------------------------|---------------|---------------|---------------|
| High level term                                                  |               |               |               |
| Preferred term                                                   |               |               |               |
| MedDRA Version 14.0                                              |               |               |               |
| Number of subjects (%) with at least one medical history finding | N=1432 (100%) | N=1452 (100%) | N=2884 (100%) |
| Blood and lymphatic system disorders                             | 1103 ( 77.0%) | 1100 ( 75.8%) | 2203 ( 76.4%) |
| Anaemia deficiencies                                             | 30 ( 2.1%)    | 33 ( 2.3%)    | 63 ( 2.2%)    |
| Anaemia of pregnancy                                             | 5 ( 0.3%)     | 2 ( 0.1%)     | 7 ( 0.2%)     |
| Iron deficiency anaemia                                          | 3 ( 0.2%)     | 0             | 3 ( 0.1%)     |
| Anaemias NEC                                                     | 2 ( 0.1%)     | 2 ( 0.1%)     | 4 ( 0.1%)     |
| Anaemia                                                          | 22 ( 1.5%)    | 27 ( 1.9%)    | 49 ( 1.7%)    |
| Coagulopathies                                                   | 22 ( 1.5%)    | 27 ( 1.9%)    | 49 ( 1.7%)    |
| Activated protein C resistance                                   | 1 ( <0.1%)    | 0             | 1 ( <0.1%)    |
| Lymphatic system disorders NEC                                   | 1 ( <0.1%)    | 0             | 1 ( <0.1%)    |
| Lymphadenitis                                                    | 1 ( <0.1%)    | 3 ( 0.2%)     | 4 ( 0.1%)     |
| Lymphadenopathy                                                  | 0             | 2 ( 0.1%)     | 2 ( <0.1%)    |
| Lymphoid tissue hyperplasia                                      | 0             | 2 ( 0.1%)     | 2 ( <0.1%)    |
| Thrombocytopenias                                                | 1 ( <0.1%)    | 0             | 1 ( <0.1%)    |
| Idiopathic thrombocytopenic purpura                              | 1 ( <0.1%)    | 1 ( <0.1%)    | 2 ( <0.1%)    |
| Thrombocytopenia                                                 | 0             | 1 ( <0.1%)    | 1 ( <0.1%)    |
| Thrombocytoses                                                   | 1 ( <0.1%)    | 0             | 1 ( <0.1%)    |
| Thrombocytosis                                                   | 0             | 1 ( <0.1%)    | 1 ( <0.1%)    |
| Cardiac disorders                                                | 6 ( 0.4%)     | 19 ( 1.3%)    | 25 ( 0.9%)    |
| Aortic valvular disorders                                        | 0             | 1 ( <0.1%)    | 1 ( <0.1%)    |
| Aortic valve disease                                             | 0             | 1 ( <0.1%)    | 1 ( <0.1%)    |
| Cardiac conduction disorders                                     | 0             | 1 ( <0.1%)    | 1 ( <0.1%)    |
| Wolff-Parkinson-White syndrome                                   | 0             | 1 ( <0.1%)    | 1 ( <0.1%)    |
| Cardiac signs and symptoms NEC                                   | 1 ( <0.1%)    | 3 ( 0.2%)     | 4 ( 0.1%)     |
| Palpitations                                                     | 1 ( <0.1%)    | 3 ( 0.2%)     | 4 ( 0.1%)     |
| Ischaemic coronary artery disorders                              | 0             | 1 ( <0.1%)    | 1 ( <0.1%)    |
| Angina pectoris                                                  | 0             | 1 ( <0.1%)    | 1 ( <0.1%)    |
| Mitral valvular disorders                                        | 2 ( 0.1%)     | 6 ( 0.4%)     | 8 ( 0.3%)     |
| Mitral valve disease                                             | 0             | 1 ( <0.1%)    | 1 ( <0.1%)    |
| Mitral valve prolapse                                            | 2 ( 0.1%)     | 5 ( 0.3%)     | 7 ( 0.2%)     |
| Noninfectious myocarditis                                        | 1 ( <0.1%)    | 1 ( <0.1%)    | 2 ( <0.1%)    |
| Myocarditis                                                      | 1 ( <0.1%)    | 1 ( <0.1%)    | 2 ( <0.1%)    |
| Pulmonary valvular disorders                                     | 0             | 1 ( <0.1%)    | 1 ( <0.1%)    |
| Pulmonary valve stenosis                                         | 0             | 1 ( <0.1%)    | 1 ( <0.1%)    |
| Rate and rhythm disorders NEC                                    | 3 ( 0.2%)     | 5 ( 0.3%)     | 8 ( 0.3%)     |
| Arrhythmia                                                       | 2 ( 0.1%)     | 2 ( 0.1%)     | 4 ( 0.1%)     |
| Tachycardia                                                      | 1 ( <0.1%)    | 3 ( 0.2%)     | 4 ( 0.1%)     |

**Table 14.1.1 / 26: Number of subjects with medical history findings by primary system organ class, high level term, preferred term by treatment (FAS)**

| Primary system organ class                                                       |               |               |               |
|----------------------------------------------------------------------------------|---------------|---------------|---------------|
| High level term                                                                  |               |               |               |
| Preferred term                                                                   | LCS12         | LCS16         | Total         |
| MedDRA Version 14.0                                                              | N=1432 (100%) | N=1452 (100%) | N=2884 (100%) |
| Supraventricular arrhythmias                                                     | 0             | 3 ( 0.2%)     | 3 ( 0.1%)     |
| Supraventricular tachycardia                                                     | 0             | 3 ( 0.2%)     | 3 ( 0.1%)     |
| Congenital, familial and genetic disorders                                       | 20 ( 1.4%)    | 17 ( 1.2%)    | 37 ( 1.3%)    |
| Breast disorders congenital                                                      | 0             | 1 (<0.1%)     | 1 (<0.1%)     |
| Accessory breast                                                                 | 0             | 1 (<0.1%)     | 1 (<0.1%)     |
| Cardiac septal defects congenital                                                | 2 ( 0.1%)     | 3 ( 0.2%)     | 5 ( 0.2%)     |
| Atrial septal defect                                                             | 1 (<0.1%)     | 0             | 1 (<0.1%)     |
| Ventricular septal defect                                                        | 1 (<0.1%)     | 3 ( 0.2%)     | 4 ( 0.1%)     |
| Chromosomal abnormalities NEC                                                    | 1 (<0.1%)     | 0             | 1 (<0.1%)     |
| Gene mutation                                                                    | 1 (<0.1%)     | 0             | 1 (<0.1%)     |
| Coagulation disorders congenital                                                 | 2 ( 0.1%)     | 2 ( 0.1%)     | 4 ( 0.1%)     |
| Factor V Leiden mutation                                                         | 1 (<0.1%)     | 1 (<0.1%)     | 2 (<0.1%)     |
| Protein S deficiency                                                             | 1 (<0.1%)     | 0             | 1 (<0.1%)     |
| Von Willebrand's disease                                                         | 1 (<0.1%)     | 1 (<0.1%)     | 2 (<0.1%)     |
| Congenital disorders NEC                                                         | 0             | 1 (<0.1%)     | 1 (<0.1%)     |
| Foetal malformation                                                              | 0             | 1 (<0.1%)     | 1 (<0.1%)     |
| Connective tissue disorders congenital                                           | 1 (<0.1%)     | 0             | 1 (<0.1%)     |
| Ehlers-Danlos syndrome                                                           | 1 (<0.1%)     | 0             | 1 (<0.1%)     |
| External ear disorders congenital                                                | 0             | 1 (<0.1%)     | 1 (<0.1%)     |
| Anomaly of external ear congenital                                               | 0             | 1 (<0.1%)     | 1 (<0.1%)     |
| Gastric disorders congenital                                                     | 1 (<0.1%)     | 0             | 1 (<0.1%)     |
| Pyloric stenosis                                                                 | 1 (<0.1%)     | 0             | 1 (<0.1%)     |
| Haematological disorders congenital NEC                                          | 1 (<0.1%)     | 0             | 1 (<0.1%)     |
| Hereditary spherocytosis                                                         | 1 (<0.1%)     | 0             | 1 (<0.1%)     |
| Haemoglobinopathies congenital                                                   | 1 (<0.1%)     | 2 ( 0.1%)     | 3 ( 0.1%)     |
| Sickle cell trait                                                                | 1 (<0.1%)     | 2 ( 0.1%)     | 3 ( 0.1%)     |
| Hearing disorders congenital                                                     | 0             | 1 (<0.1%)     | 1 (<0.1%)     |
| Deafness congenital                                                              | 0             | 1 (<0.1%)     | 1 (<0.1%)     |
| Intestinal disorders congenital                                                  | 0             | 1 (<0.1%)     | 1 (<0.1%)     |
| Congenital intestinal malformation                                               | 0             | 1 (<0.1%)     | 1 (<0.1%)     |
| Musculoskeletal and connective tissue disorders of face, neck and jaw congenital | 1 (<0.1%)     | 0             | 1 (<0.1%)     |
| Branchial cleft cyst                                                             | 1 (<0.1%)     | 0             | 1 (<0.1%)     |
| Musculoskeletal and connective tissue disorders of limbs congenital              | 6 ( 0.4%)     | 1 (<0.1%)     | 7 ( 0.2%)     |
| Congenital foot malformation                                                     | 1 (<0.1%)     | 1 (<0.1%)     | 2 (<0.1%)     |
| Congenital hand malformation                                                     | 0             | 1 (<0.1%)     | 1 (<0.1%)     |
| Congenital knee deformity                                                        | 1 (<0.1%)     | 0             | 1 (<0.1%)     |
| Hip dysplasia                                                                    | 3 ( 0.2%)     | 0             | 3 ( 0.1%)     |
| Syndactyly                                                                       | 1 (<0.1%)     | 0             | 1 (<0.1%)     |
| Talipes                                                                          | 1 (<0.1%)     | 0             | 1 (<0.1%)     |
| Non-site specific bone disorders congenital                                      | 0             | 1 (<0.1%)     | 1 (<0.1%)     |
| Fibrous dysplasia of bone                                                        | 0             | 1 (<0.1%)     | 1 (<0.1%)     |

**Table 14.1.1 / 26: Number of subjects with medical history findings by primary system organ class, high level term, preferred term by treatment (FAS)**

| Primary system organ class                            | LCS12         | LCS16         | Total         |
|-------------------------------------------------------|---------------|---------------|---------------|
| High level term                                       |               |               |               |
| Preferred term                                        |               |               |               |
| MedDRA Version 14.0                                   | N=1432 (100%) | N=1452 (100%) | N=2884 (100%) |
| Pulmonary and bronchial disorders congenital          | 1 ( <0.1%)    | 0             | 1 ( <0.1%)    |
| Pulmonary malformation                                | 1 ( <0.1%)    | 0             | 1 ( <0.1%)    |
| Renal and urinary tract disorders congenital NEC      | 1 ( <0.1%)    | 0             | 1 ( <0.1%)    |
| Urethral intrinsic sphincter deficiency               | 1 ( <0.1%)    | 0             | 1 ( <0.1%)    |
| Renal disorders congenital                            | 1 ( <0.1%)    | 1 ( <0.1%)    | 2 ( <0.1%)    |
| Pelvic kidney                                         | 1 ( <0.1%)    | 0             | 1 ( <0.1%)    |
| Solitary kidney                                       | 0             | 1 ( <0.1%)    | 1 ( <0.1%)    |
| Retinal disorders congenital                          | 1 ( <0.1%)    | 0             | 1 ( <0.1%)    |
| Retinal anomaly congenital                            | 1 ( <0.1%)    | 0             | 1 ( <0.1%)    |
| Skin and subcutaneous tissue disorders congenital NEC | 0             | 1 ( <0.1%)    | 1 ( <0.1%)    |
| Birth mark                                            | 0             | 1 ( <0.1%)    | 1 ( <0.1%)    |
| Ureteric disorders congenital                         | 0             | 1 ( <0.1%)    | 1 ( <0.1%)    |
| Congenital ureteric anomaly                           | 0             | 1 ( <0.1%)    | 1 ( <0.1%)    |
| Ear and labyrinth disorders                           | 9 ( 0.6%)     | 5 ( 0.3%)     | 14 ( 0.5%)    |
| Hearing losses                                        | 2 ( 0.1%)     | 1 ( <0.1%)    | 3 ( 0.1%)     |
| Deafness bilateral                                    | 1 ( <0.1%)    | 0             | 1 ( <0.1%)    |
| Hearing impaired                                      | 1 ( <0.1%)    | 1 ( <0.1%)    | 2 ( <0.1%)    |
| Inner ear signs and symptoms                          | 3 ( 0.2%)     | 2 ( 0.1%)     | 5 ( 0.2%)     |
| Motion sickness                                       | 1 ( <0.1%)    | 1 ( <0.1%)    | 2 ( <0.1%)    |
| Tinnitus                                              | 2 ( 0.1%)     | 0             | 2 ( <0.1%)    |
| Vertigo                                               | 0             | 1 ( <0.1%)    | 1 ( <0.1%)    |
| Middle ear disorders NEC                              | 0             | 1 ( <0.1%)    | 1 ( <0.1%)    |
| Otosclerosis                                          | 0             | 1 ( <0.1%)    | 1 ( <0.1%)    |
| Tympanic membrane disorders (excl infections)         | 4 ( 0.3%)     | 1 ( <0.1%)    | 5 ( 0.2%)     |
| Tympanic membrane perforation                         | 4 ( 0.3%)     | 1 ( <0.1%)    | 5 ( 0.2%)     |
| Endocrine disorders                                   | 15 ( 1.0%)    | 21 ( 1.4%)    | 36 ( 1.2%)    |
| Acute and chronic thyroiditis                         | 0             | 3 ( 0.2%)     | 3 ( 0.1%)     |
| Thyroiditis                                           | 0             | 3 ( 0.2%)     | 3 ( 0.1%)     |
| Adrenal cortical hyperfunctions                       | 1 ( <0.1%)    | 0             | 1 ( <0.1%)    |
| Primary hyperaldosteronism                            | 1 ( <0.1%)    | 0             | 1 ( <0.1%)    |
| Anterior pituitary hyperfunction                      | 0             | 1 ( <0.1%)    | 1 ( <0.1%)    |
| Hyperprolactinaemia                                   | 0             | 1 ( <0.1%)    | 1 ( <0.1%)    |
| Thyroid disorders NEC                                 | 1 ( <0.1%)    | 5 ( 0.3%)     | 6 ( 0.2%)     |
| Goitre                                                | 1 ( <0.1%)    | 4 ( 0.3%)     | 5 ( 0.2%)     |
| Thyroid dysfunction in pregnancy                      | 0             | 1 ( <0.1%)    | 1 ( <0.1%)    |
| Thyroid hyperfunction disorders                       | 4 ( 0.3%)     | 2 ( 0.1%)     | 6 ( 0.2%)     |
| Basedow's disease                                     | 1 ( <0.1%)    | 0             | 1 ( <0.1%)    |
| Hyperthyroidism                                       | 3 ( 0.2%)     | 2 ( 0.1%)     | 5 ( 0.2%)     |
| Thyroid hypofunction disorders                        | 7 ( 0.5%)     | 12 ( 0.8%)    | 19 ( 0.7%)    |
| Hypothyroidism                                        | 7 ( 0.5%)     | 12 ( 0.8%)    | 19 ( 0.7%)    |

**Table 14.1.1 / 26: Number of subjects with medical history findings by primary system organ class, high level term, preferred term by treatment (FAS)**

| Primary system organ class                                       | LCS12         | LCS16         | Total         |
|------------------------------------------------------------------|---------------|---------------|---------------|
| High level term                                                  | N=1432 (100%) | N=1452 (100%) | N=2884 (100%) |
| Preferred term                                                   |               |               |               |
| MedDRA Version 14.0                                              |               |               |               |
| Thyroid neoplasms                                                | 2 ( 0.1%)     | 0             | 2 ( <0.1%)    |
| Thyroid cyst                                                     | 2 ( 0.1%)     | 0             | 2 ( <0.1%)    |
| Eye disorders                                                    | 34 ( 2.4%)    | 43 ( 3.0%)    | 77 ( 2.7%)    |
| Amblyopic vision impairment                                      | 0             | 3 ( 0.2%)     | 3 ( 0.1%)     |
| Amblyopia                                                        | 0             | 3 ( 0.2%)     | 3 ( 0.1%)     |
| Conjunctival infections, irritations and inflammations           | 3 ( 0.2%)     | 2 ( 0.1%)     | 5 ( 0.2%)     |
| Conjunctivitis                                                   | 2 ( 0.1%)     | 2 ( 0.1%)     | 4 ( 0.1%)     |
| Conjunctivitis allergic                                          | 1 ( <0.1%)    | 0             | 1 ( <0.1%)    |
| Corneal infections, oedemas and inflammations                    | 1 ( <0.1%)    | 0             | 1 ( <0.1%)    |
| Ulcerative keratitis                                             | 1 ( <0.1%)    | 0             | 1 ( <0.1%)    |
| Iris and uveal tract infections, irritations and inflammations   | 1 ( <0.1%)    | 1 ( <0.1%)    | 2 ( <0.1%)    |
| Iritis                                                           | 1 ( <0.1%)    | 1 ( <0.1%)    | 2 ( <0.1%)    |
| Lacrimal disorders                                               | 1 ( <0.1%)    | 1 ( <0.1%)    | 2 ( <0.1%)    |
| Dry eye                                                          | 1 ( <0.1%)    | 1 ( <0.1%)    | 2 ( <0.1%)    |
| Lid, lash and lacrimal infections, irritations and inflammations | 1 ( <0.1%)    | 0             | 1 ( <0.1%)    |
| Blepharitis                                                      | 1 ( <0.1%)    | 0             | 1 ( <0.1%)    |
| Ocular infections, inflammations and associated manifestations   | 0             | 2 ( 0.1%)     | 2 ( <0.1%)    |
| Eye allergy                                                      | 0             | 1 ( <0.1%)    | 1 ( <0.1%)    |
| Eye pruritus                                                     | 0             | 1 ( <0.1%)    | 1 ( <0.1%)    |
| Ocular nerve and muscle disorders                                | 0             | 3 ( 0.2%)     | 3 ( 0.1%)     |
| Strabismus                                                       | 0             | 3 ( 0.2%)     | 3 ( 0.1%)     |
| Ocular sensation disorders                                       | 0             | 1 ( <0.1%)    | 1 ( <0.1%)    |
| Asthenopia                                                       | 0             | 1 ( <0.1%)    | 1 ( <0.1%)    |
| Optic disc abnormalities NEC                                     | 1 ( <0.1%)    | 0             | 1 ( <0.1%)    |
| Papilloedema                                                     | 1 ( <0.1%)    | 0             | 1 ( <0.1%)    |
| Partial vision loss                                              | 1 ( <0.1%)    | 1 ( <0.1%)    | 2 ( <0.1%)    |
| Visual acuity reduced                                            | 1 ( <0.1%)    | 1 ( <0.1%)    | 2 ( <0.1%)    |
| Refractive and accommodative disorders                           | 23 ( 1.6%)    | 28 ( 1.9%)    | 51 ( 1.8%)    |
| Astigmatism                                                      | 5 ( 0.3%)     | 10 ( 0.7%)    | 15 ( 0.5%)    |
| Hypermetropia                                                    | 3 ( 0.2%)     | 3 ( 0.2%)     | 6 ( 0.2%)     |
| Myopia                                                           | 19 ( 1.3%)    | 17 ( 1.2%)    | 36 ( 1.2%)    |
| Refraction disorder                                              | 0             | 1 ( <0.1%)    | 1 ( <0.1%)    |
| Retinal structural change, deposit and degeneration              | 1 ( <0.1%)    | 0             | 1 ( <0.1%)    |
| Retinal detachment                                               | 1 ( <0.1%)    | 0             | 1 ( <0.1%)    |
| Visual disorders NEC                                             | 0             | 2 ( 0.1%)     | 2 ( <0.1%)    |
| Vision blurred                                                   | 0             | 2 ( 0.1%)     | 2 ( <0.1%)    |
| Visual field disorders                                           | 1 ( <0.1%)    | 0             | 1 ( <0.1%)    |
| Scotoma                                                          | 1 ( <0.1%)    | 0             | 1 ( <0.1%)    |
| Gastrointestinal disorders                                       | 116 ( 8.1%)   | 103 ( 7.1%)   | 219 ( 7.6%)   |

**Table 14.1.1 / 26: Number of subjects with medical history findings by primary system organ class, high level term, preferred term by treatment (FAS)**

| Primary system organ class                          | LCS12         | LCS16         | Total         |
|-----------------------------------------------------|---------------|---------------|---------------|
| High level term                                     |               |               |               |
| Preferred term                                      |               |               |               |
| MedDRA Version 14.0                                 | N=1432 (100%) | N=1452 (100%) | N=2884 (100%) |
| Abdominal cavity hernias NEC                        | 0             | 1 ( <0.1%)    | 1 ( <0.1%)    |
| Ischiorectal hernia                                 | 0             | 1 ( <0.1%)    | 1 ( <0.1%)    |
| Abdominal hernias, site unspecified                 | 1 ( <0.1%)    | 0             | 1 ( <0.1%)    |
| Abdominal hernia                                    | 1 ( <0.1%)    | 0             | 1 ( <0.1%)    |
| Abdominal wall conditions NEC                       | 1 ( <0.1%)    | 0             | 1 ( <0.1%)    |
| Abdominal wall cyst                                 | 1 ( <0.1%)    | 0             | 1 ( <0.1%)    |
| Acute and chronic pancreatitis                      | 0             | 3 ( 0.2%)     | 3 ( 0.1%)     |
| Pancreatitis                                        | 0             | 2 ( 0.1%)     | 2 ( <0.1%)    |
| Pancreatitis acute                                  | 0             | 1 ( <0.1%)    | 1 ( <0.1%)    |
| Anal and rectal disorders NEC                       | 2 ( 0.1%)     | 2 ( 0.1%)     | 4 ( 0.1%)     |
| Anal fissure                                        | 1 ( <0.1%)    | 1 ( <0.1%)    | 2 ( <0.1%)    |
| Rectal fissure                                      | 1 ( <0.1%)    | 1 ( <0.1%)    | 2 ( <0.1%)    |
| Colitis (excl infective)                            | 4 ( 0.3%)     | 1 ( <0.1%)    | 5 ( 0.2%)     |
| Colitis                                             | 1 ( <0.1%)    | 0             | 1 ( <0.1%)    |
| Colitis ulcerative                                  | 2 ( 0.1%)     | 1 ( <0.1%)    | 3 ( 0.1%)     |
| Necrotising colitis                                 | 1 ( <0.1%)    | 0             | 1 ( <0.1%)    |
| Dental and periodontal infections and inflammations | 0             | 1 ( <0.1%)    | 1 ( <0.1%)    |
| Dental caries                                       | 0             | 1 ( <0.1%)    | 1 ( <0.1%)    |
| Dental disorders NEC                                | 2 ( 0.1%)     | 2 ( 0.1%)     | 4 ( 0.1%)     |
| Malocclusion                                        | 1 ( <0.1%)    | 0             | 1 ( <0.1%)    |
| Tooth disorder                                      | 1 ( <0.1%)    | 0             | 1 ( <0.1%)    |
| Tooth impacted                                      | 0             | 2 ( 0.1%)     | 2 ( <0.1%)    |
| Dental pain and sensation disorders                 | 1 ( <0.1%)    | 2 ( 0.1%)     | 3 ( 0.1%)     |
| Toothache                                           | 1 ( <0.1%)    | 2 ( 0.1%)     | 3 ( 0.1%)     |
| Diaphragmatic hernias                               | 0             | 1 ( <0.1%)    | 1 ( <0.1%)    |
| Hiatus hernia                                       | 0             | 1 ( <0.1%)    | 1 ( <0.1%)    |
| Diarrhoea (excl infective)                          | 7 ( 0.5%)     | 2 ( 0.1%)     | 9 ( 0.3%)     |
| Diarrhoea                                           | 7 ( 0.5%)     | 2 ( 0.1%)     | 9 ( 0.3%)     |
| Dyspeptic signs and symptoms                        | 9 ( 0.6%)     | 8 ( 0.6%)     | 17 ( 0.6%)    |
| Dyspepsia                                           | 9 ( 0.6%)     | 8 ( 0.6%)     | 17 ( 0.6%)    |
| Femoral hernias                                     | 0             | 1 ( <0.1%)    | 1 ( <0.1%)    |
| Femoral hernia                                      | 0             | 1 ( <0.1%)    | 1 ( <0.1%)    |
| Flatulence, bloating and distension                 | 0             | 3 ( 0.2%)     | 3 ( 0.1%)     |
| Abdominal distension                                | 0             | 2 ( 0.1%)     | 2 ( <0.1%)    |
| Flatulence                                          | 0             | 1 ( <0.1%)    | 1 ( <0.1%)    |
| Gastric ulcers and perforation                      | 7 ( 0.5%)     | 2 ( 0.1%)     | 9 ( 0.3%)     |
| Gastric ulcer                                       | 7 ( 0.5%)     | 2 ( 0.1%)     | 9 ( 0.3%)     |
| Gastritis (excl infective)                          | 7 ( 0.5%)     | 7 ( 0.5%)     | 14 ( 0.5%)    |
| Gastritis                                           | 7 ( 0.5%)     | 7 ( 0.5%)     | 14 ( 0.5%)    |



**Table 14.1.1 / 26: Number of subjects with medical history findings by primary system organ class, high level term, preferred term by treatment (FAS)**

| Primary system organ class                                   | LCS12         | LCS16         | Total         |
|--------------------------------------------------------------|---------------|---------------|---------------|
| High level term                                              |               |               |               |
| Preferred term                                               |               |               |               |
| MedDRA Version 14.0                                          | N=1432 (100%) | N=1452 (100%) | N=2884 (100%) |
| Gastrointestinal and abdominal pains (excl oral and throat)  | 12 ( 0.8%)    | 10 ( 0.7%)    | 22 ( 0.8%)    |
| Abdominal pain                                               | 9 ( 0.6%)     | 4 ( 0.3%)     | 13 ( 0.5%)    |
| Abdominal pain lower                                         | 1 (<0.1%)     | 2 ( 0.1%)     | 3 ( 0.1%)     |
| Abdominal pain upper                                         | 2 ( 0.1%)     | 4 ( 0.3%)     | 6 ( 0.2%)     |
| Gastrointestinal atonic and hypomotility disorders NEC       | 30 ( 2.1%)    | 24 ( 1.7%)    | 54 ( 1.9%)    |
| Constipation                                                 | 16 ( 1.1%)    | 14 ( 1.0%)    | 30 ( 1.0%)    |
| Gastroesophageal reflux disease                              | 17 ( 1.2%)    | 11 ( 0.8%)    | 28 ( 1.0%)    |
| Impaired gastric emptying                                    | 1 (<0.1%)     | 0             | 1 (<0.1%)     |
| Gastrointestinal disorders NEC                               | 2 ( 0.1%)     | 0             | 2 (<0.1%)     |
| Bezoar                                                       | 1 (<0.1%)     | 0             | 1 (<0.1%)     |
| Gastric disorder                                             | 1 (<0.1%)     | 0             | 1 (<0.1%)     |
| Gastrointestinal dyskinetic disorders                        | 0             | 1 (<0.1%)     | 1 (<0.1%)     |
| Bowel movement irregularity                                  | 0             | 1 (<0.1%)     | 1 (<0.1%)     |
| Gastrointestinal fistulae                                    | 0             | 1 (<0.1%)     | 1 (<0.1%)     |
| Anal fistula                                                 | 0             | 1 (<0.1%)     | 1 (<0.1%)     |
| Gastrointestinal inflammatory disorders NEC                  | 1 (<0.1%)     | 0             | 1 (<0.1%)     |
| Crohn's disease                                              | 1 (<0.1%)     | 0             | 1 (<0.1%)     |
| Gastrointestinal signs and symptoms NEC                      | 1 (<0.1%)     | 3 ( 0.2%)     | 4 ( 0.1%)     |
| Abdominal discomfort                                         | 1 (<0.1%)     | 1 (<0.1%)     | 2 (<0.1%)     |
| Dysphagia                                                    | 0             | 2 ( 0.1%)     | 2 (<0.1%)     |
| Gastrointestinal spastic and hypermotility disorders         | 24 ( 1.7%)    | 13 ( 0.9%)    | 37 ( 1.3%)    |
| Irritable bowel syndrome                                     | 24 ( 1.7%)    | 13 ( 0.9%)    | 37 ( 1.3%)    |
| Gastrointestinal stenosis and obstruction NEC                | 1 (<0.1%)     | 0             | 1 (<0.1%)     |
| Ileus                                                        | 1 (<0.1%)     | 0             | 1 (<0.1%)     |
| Gastrointestinal ulcers and perforation, site unspecified    | 0             | 3 ( 0.2%)     | 3 ( 0.1%)     |
| Gastrointestinal ulcer                                       | 0             | 3 ( 0.2%)     | 3 ( 0.1%)     |
| Haemorrhoids and gastrointestinal varices (excl oesophageal) | 10 ( 0.7%)    | 6 ( 0.4%)     | 16 ( 0.6%)    |
| Haemorrhoids                                                 | 10 ( 0.7%)    | 6 ( 0.4%)     | 16 ( 0.6%)    |
| Inguinal hernias                                             | 4 ( 0.3%)     | 4 ( 0.3%)     | 8 ( 0.3%)     |
| Inguinal hernia                                              | 4 ( 0.3%)     | 4 ( 0.3%)     | 8 ( 0.3%)     |
| Intestinal haemorrhages                                      | 0             | 2 ( 0.1%)     | 2 (<0.1%)     |
| Rectal haemorrhage                                           | 0             | 2 ( 0.1%)     | 2 (<0.1%)     |
| Malabsorption syndromes                                      | 3 ( 0.2%)     | 1 (<0.1%)     | 4 ( 0.1%)     |
| Coeliac disease                                              | 3 ( 0.2%)     | 1 (<0.1%)     | 4 ( 0.1%)     |
| Nausea and vomiting symptoms                                 | 0             | 4 ( 0.3%)     | 4 ( 0.1%)     |
| Nausea                                                       | 0             | 4 ( 0.3%)     | 4 ( 0.1%)     |
| Oesophagitis (excl infective)                                | 0             | 1 (<0.1%)     | 1 (<0.1%)     |
| Oesophagitis                                                 | 0             | 1 (<0.1%)     | 1 (<0.1%)     |
| Peptic ulcers and perforation                                | 1 (<0.1%)     | 0             | 1 (<0.1%)     |
| Peptic ulcer                                                 | 1 (<0.1%)     | 0             | 1 (<0.1%)     |
| Peritoneal and retroperitoneal disorders                     | 0             | 1 (<0.1%)     | 1 (<0.1%)     |
| Peritonitis                                                  | 0             | 1 (<0.1%)     | 1 (<0.1%)     |

**Table 14.1.1 / 26: Number of subjects with medical history findings by primary system organ class, high level term, preferred term by treatment (FAS)**

| Primary system organ class                           | LCS12         | LCS16         | Total         |
|------------------------------------------------------|---------------|---------------|---------------|
| High level term                                      |               |               |               |
| Preferred term                                       |               |               |               |
| MedDRA Version 14.0                                  | N=1432 (100%) | N=1452 (100%) | N=2884 (100%) |
| Salivary gland infections and inflammations          | 0             | 1 (<0.1%)     | 1 (<0.1%)     |
| Parotid gland inflammation                           | 0             | 1 (<0.1%)     | 1 (<0.1%)     |
| Umbilical hernias                                    | 1 (<0.1%)     | 1 (<0.1%)     | 2 (<0.1%)     |
| Umbilical hernia                                     | 1 (<0.1%)     | 1 (<0.1%)     | 2 (<0.1%)     |
| General disorders and administration site conditions | 23 ( 1.6%)    | 16 ( 1.1%)    | 39 ( 1.4%)    |
| Asthenic conditions                                  | 7 ( 0.5%)     | 3 ( 0.2%)     | 10 ( 0.3%)    |
| Asthenia                                             | 2 ( 0.1%)     | 1 (<0.1%)     | 3 ( 0.1%)     |
| Chronic fatigue syndrome                             | 1 (<0.1%)     | 0             | 1 (<0.1%)     |
| Fatigue                                              | 5 ( 0.3%)     | 2 ( 0.1%)     | 7 ( 0.2%)     |
| Breast complications associated with device          | 0             | 1 (<0.1%)     | 1 (<0.1%)     |
| Capsular contracture associated with breast implant  | 0             | 1 (<0.1%)     | 1 (<0.1%)     |
| Complications associated with device NEC             | 1 (<0.1%)     | 0             | 1 (<0.1%)     |
| Medical device pain                                  | 1 (<0.1%)     | 0             | 1 (<0.1%)     |
| Device issues NEC                                    | 0             | 1 (<0.1%)     | 1 (<0.1%)     |
| Device dislocation                                   | 0             | 1 (<0.1%)     | 1 (<0.1%)     |
| Device operational issues NEC                        | 1 (<0.1%)     | 0             | 1 (<0.1%)     |
| Device difficult to use                              | 1 (<0.1%)     | 0             | 1 (<0.1%)     |
| General signs and symptoms NEC                       | 1 (<0.1%)     | 1 (<0.1%)     | 2 (<0.1%)     |
| Irritability                                         | 0             | 1 (<0.1%)     | 1 (<0.1%)     |
| Unevaluable event                                    | 1 (<0.1%)     | 0             | 1 (<0.1%)     |
| Hernias NEC                                          | 3 ( 0.2%)     | 2 ( 0.1%)     | 5 ( 0.2%)     |
| Hernia                                               | 3 ( 0.2%)     | 2 ( 0.1%)     | 5 ( 0.2%)     |
| Mass conditions NEC                                  | 3 ( 0.2%)     | 0             | 3 ( 0.1%)     |
| Cyst                                                 | 2 ( 0.1%)     | 0             | 2 (<0.1%)     |
| Haemorrhagic cyst                                    | 1 (<0.1%)     | 0             | 1 (<0.1%)     |
| Oedema NEC                                           | 0             | 1 (<0.1%)     | 1 (<0.1%)     |
| Oedema peripheral                                    | 0             | 1 (<0.1%)     | 1 (<0.1%)     |
| Pain and discomfort NEC                              | 5 ( 0.3%)     | 6 ( 0.4%)     | 11 ( 0.4%)    |
| Chest discomfort                                     | 1 (<0.1%)     | 0             | 1 (<0.1%)     |
| Chest pain                                           | 1 (<0.1%)     | 1 (<0.1%)     | 2 (<0.1%)     |
| Facial pain                                          | 1 (<0.1%)     | 0             | 1 (<0.1%)     |
| Pain                                                 | 2 ( 0.1%)     | 5 ( 0.3%)     | 7 ( 0.2%)     |
| Therapeutic and nontherapeutic responses             | 2 ( 0.1%)     | 1 (<0.1%)     | 3 ( 0.1%)     |
| Drug intolerance                                     | 2 ( 0.1%)     | 1 (<0.1%)     | 3 ( 0.1%)     |
| Trophic disorders                                    | 0             | 1 (<0.1%)     | 1 (<0.1%)     |
| Metaplasia                                           | 0             | 1 (<0.1%)     | 1 (<0.1%)     |
| Hepatobiliary disorders                              | 22 ( 1.5%)    | 15 ( 1.0%)    | 37 ( 1.3%)    |
| Cholecystitis and cholelithiasis                     | 15 ( 1.0%)    | 12 ( 0.8%)    | 27 ( 0.9%)    |
| Cholecystitis                                        | 0             | 3 ( 0.2%)     | 3 ( 0.1%)     |
| Cholelithiasis                                       | 15 ( 1.0%)    | 9 ( 0.6%)     | 24 ( 0.8%)    |

**Table 14.1.1 / 26: Number of subjects with medical history findings by primary system organ class, high level term, preferred term by treatment (FAS)**

| Primary system organ class                                    | LCS12               | LCS16               | Total               |
|---------------------------------------------------------------|---------------------|---------------------|---------------------|
| High level term                                               |                     |                     |                     |
| Preferred term                                                |                     |                     |                     |
| MedDRA Version 14.0                                           | N=1432 (100%)       | N=1452 (100%)       | N=2884 (100%)       |
| Cholestasis and jaundice                                      | 3 ( 0.2%)           | 1 (<0.1%)           | 4 ( 0.1%)           |
| Cholestasis                                                   | 0                   | 1 (<0.1%)           | 1 (<0.1%)           |
| Cholestasis of pregnancy                                      | 3 ( 0.2%)           | 0                   | 3 ( 0.1%)           |
| Gallbladder disorders NEC                                     | 3 ( 0.2%)           | 1 (<0.1%)           | 4 ( 0.1%)           |
| Gallbladder disorder                                          | 3 ( 0.2%)           | 1 (<0.1%)           | 4 ( 0.1%)           |
| Hepatocellular damage and hepatitis NEC                       | 1 (<0.1%)           | 1 (<0.1%)           | 2 (<0.1%)           |
| Hepatic steatosis                                             | 1 (<0.1%)           | 0                   | 1 (<0.1%)           |
| Hepatitis                                                     | 0                   | 1 (<0.1%)           | 1 (<0.1%)           |
| <b>Immune system disorders</b>                                | <b>241 ( 16.8%)</b> | <b>265 ( 18.3%)</b> | <b>506 ( 17.5%)</b> |
| Allergic conditions NEC                                       | 40 ( 2.8%)          | 56 ( 3.9%)          | 96 ( 3.3%)          |
| Allergy to animal                                             | 20 ( 1.4%)          | 27 ( 1.9%)          | 47 ( 1.6%)          |
| Allergy to arthropod bite                                     | 0                   | 1 (<0.1%)           | 1 (<0.1%)           |
| Allergy to arthropod sting                                    | 3 ( 0.2%)           | 1 (<0.1%)           | 4 ( 0.1%)           |
| Allergy to metals                                             | 6 ( 0.4%)           | 6 ( 0.4%)           | 12 ( 0.4%)          |
| Allergy to plants                                             | 1 (<0.1%)           | 1 (<0.1%)           | 2 (<0.1%)           |
| Hypersensitivity                                              | 7 ( 0.5%)           | 17 ( 1.2%)          | 24 ( 0.8%)          |
| Multiple allergies                                            | 2 ( 0.1%)           | 4 ( 0.3%)           | 6 ( 0.2%)           |
| Mycotic allergy                                               | 1 (<0.1%)           | 2 ( 0.1%)           | 3 ( 0.1%)           |
| Allergies to foods, food additives, drugs and other chemicals | 113 ( 7.9%)         | 123 ( 8.5%)         | 236 ( 8.2%)         |
| Allergy to chemicals                                          | 1 (<0.1%)           | 4 ( 0.3%)           | 5 ( 0.2%)           |
| Allergy to vaccine                                            | 1 (<0.1%)           | 1 (<0.1%)           | 2 (<0.1%)           |
| Drug hypersensitivity                                         | 95 ( 6.6%)          | 97 ( 6.7%)          | 192 ( 6.7%)         |
| Food allergy                                                  | 17 ( 1.2%)          | 24 ( 1.7%)          | 41 ( 1.4%)          |
| Iodine allergy                                                | 0                   | 3 ( 0.2%)           | 3 ( 0.1%)           |
| Latex allergy                                                 | 3 ( 0.2%)           | 7 ( 0.5%)           | 10 ( 0.3%)          |
| Milk allergy                                                  | 0                   | 1 (<0.1%)           | 1 (<0.1%)           |
| Perfume sensitivity                                           | 1 (<0.1%)           | 0                   | 1 (<0.1%)           |
| Anaphylactic responses                                        | 1 (<0.1%)           | 0                   | 1 (<0.1%)           |
| Anaphylactic shock                                            | 1 (<0.1%)           | 0                   | 1 (<0.1%)           |
| Atopic disorders                                              | 130 ( 9.1%)         | 136 ( 9.4%)         | 266 ( 9.2%)         |
| Atopy                                                         | 6 ( 0.4%)           | 5 ( 0.3%)           | 11 ( 0.4%)          |
| House dust allergy                                            | 6 ( 0.4%)           | 7 ( 0.5%)           | 13 ( 0.5%)          |
| Perennial allergy                                             | 0                   | 1 (<0.1%)           | 1 (<0.1%)           |
| Seasonal allergy                                              | 123 ( 8.6%)         | 128 ( 8.8%)         | 251 ( 8.7%)         |
| <b>Infections and infestations</b>                            | <b>363 ( 25.3%)</b> | <b>347 ( 23.9%)</b> | <b>710 ( 24.6%)</b> |

**Table 14.1.1 / 26: Number of subjects with medical history findings by primary system organ class, high level term, preferred term by treatment (FAS)**

| Primary system organ class                   | LCS12         | LCS16         | Total         |
|----------------------------------------------|---------------|---------------|---------------|
| High level term                              | N=1432 (100%) | N=1452 (100%) | N=2884 (100%) |
| Preferred term                               |               |               |               |
| MedDRA Version 14.0                          |               |               |               |
| Abdominal and gastrointestinal infections    | 32 ( 2.2%)    | 27 ( 1.9%)    | 59 ( 2.0%)    |
| Appendicitis                                 | 28 ( 2.0%)    | 25 ( 1.7%)    | 53 ( 1.8%)    |
| Appendicitis perforated                      | 1 (<0.1%)     | 0             | 1 (<0.1%)     |
| Diverticulitis                               | 1 (<0.1%)     | 0             | 1 (<0.1%)     |
| Enterocolitis infectious                     | 1 (<0.1%)     | 1 (<0.1%)     | 2 (<0.1%)     |
| Gastroenteritis                              | 1 (<0.1%)     | 1 (<0.1%)     | 2 (<0.1%)     |
| Bacterial infections NEC                     | 37 ( 2.6%)    | 26 ( 1.8%)    | 63 ( 2.2%)    |
| Bacteriuria                                  | 1 (<0.1%)     | 0             | 1 (<0.1%)     |
| Cellulitis                                   | 1 (<0.1%)     | 1 (<0.1%)     | 2 (<0.1%)     |
| Enterocolitis bacterial                      | 0             | 1 (<0.1%)     | 1 (<0.1%)     |
| Folliculitis                                 | 1 (<0.1%)     | 1 (<0.1%)     | 2 (<0.1%)     |
| Vaginitis bacterial                          | 34 ( 2.4%)    | 23 ( 1.6%)    | 57 ( 2.0%)    |
| Bone and joint infections                    | 2 ( 0.1%)     | 1 (<0.1%)     | 3 ( 0.1%)     |
| Osteomyelitis                                | 2 ( 0.1%)     | 1 (<0.1%)     | 3 ( 0.1%)     |
| Borrelial infections                         | 2 ( 0.1%)     | 0             | 2 (<0.1%)     |
| Lyme disease                                 | 2 ( 0.1%)     | 0             | 2 (<0.1%)     |
| Breast infections                            | 4 ( 0.3%)     | 3 ( 0.2%)     | 7 ( 0.2%)     |
| Breast abscess                               | 1 (<0.1%)     | 2 ( 0.1%)     | 3 ( 0.1%)     |
| Breast infection                             | 1 (<0.1%)     | 0             | 1 (<0.1%)     |
| Mastitis                                     | 2 ( 0.1%)     | 0             | 2 (<0.1%)     |
| Mastitis postpartum                          | 0             | 1 (<0.1%)     | 1 (<0.1%)     |
| Candida infections                           | 23 ( 1.6%)    | 19 ( 1.3%)    | 42 ( 1.5%)    |
| Candidiasis                                  | 5 ( 0.3%)     | 7 ( 0.5%)     | 12 ( 0.4%)    |
| Genital candidiasis                          | 0             | 1 (<0.1%)     | 1 (<0.1%)     |
| Vulvovaginal candidiasis                     | 18 ( 1.3%)    | 11 ( 0.8%)    | 29 ( 1.0%)    |
| Central nervous system and spinal infections | 1 (<0.1%)     | 2 ( 0.1%)     | 3 ( 0.1%)     |
| Encephalitic infection                       | 0             | 1 (<0.1%)     | 1 (<0.1%)     |
| Meningitis                                   | 1 (<0.1%)     | 1 (<0.1%)     | 2 (<0.1%)     |
| Chlamydial infections                        | 48 ( 3.4%)    | 48 ( 3.3%)    | 96 ( 3.3%)    |
| Chlamydial cervicitis                        | 17 ( 1.2%)    | 16 ( 1.1%)    | 33 ( 1.1%)    |
| Chlamydial infection                         | 7 ( 0.5%)     | 10 ( 0.7%)    | 17 ( 0.6%)    |
| Genitourinary chlamydia infection            | 5 ( 0.3%)     | 4 ( 0.3%)     | 9 ( 0.3%)     |
| Gynaecological chlamydia infection           | 6 ( 0.4%)     | 6 ( 0.4%)     | 12 ( 0.4%)    |
| Vaginitis chlamydial                         | 13 ( 0.9%)    | 12 ( 0.8%)    | 25 ( 0.9%)    |
| Clostridia infections                        | 0             | 2 ( 0.1%)     | 2 (<0.1%)     |
| Clostridial infection                        | 0             | 2 ( 0.1%)     | 2 (<0.1%)     |
| Coccidioides infections                      | 2 ( 0.1%)     | 0             | 2 (<0.1%)     |
| Coccidioidomycosis                           | 2 ( 0.1%)     | 0             | 2 (<0.1%)     |
| Coxsackie viral infections                   | 1 (<0.1%)     | 0             | 1 (<0.1%)     |
| Hand-foot-and-mouth disease                  | 1 (<0.1%)     | 0             | 1 (<0.1%)     |
| Cytomegaloviral infections                   | 0             | 1 (<0.1%)     | 1 (<0.1%)     |
| Cytomegalovirus infection                    | 0             | 1 (<0.1%)     | 1 (<0.1%)     |

**Table 14.1.1 / 26: Number of subjects with medical history findings by primary system organ class, high level term, preferred term by treatment (FAS)**

| Primary system organ class             |               |               |               |
|----------------------------------------|---------------|---------------|---------------|
| High level term                        |               |               |               |
| Preferred term                         | LCS12         | LCS16         | Total         |
| MedDRA Version 14.0                    | N=1432 (100%) | N=1452 (100%) | N=2884 (100%) |
| Dental and oral soft tissue infections | 5 ( 0.3%)     | 4 ( 0.3%)     | 9 ( 0.3%)     |
| Periodontal infection                  | 1 (<0.1%)     | 0             | 1 (<0.1%)     |
| Tooth abscess                          | 1 (<0.1%)     | 2 ( 0.1%)     | 3 ( 0.1%)     |
| Tooth infection                        | 3 ( 0.2%)     | 2 ( 0.1%)     | 5 ( 0.2%)     |
| Ear infections                         | 13 ( 0.9%)    | 12 ( 0.8%)    | 25 ( 0.9%)    |
| Ear infection                          | 7 ( 0.5%)     | 9 ( 0.6%)     | 16 ( 0.6%)    |
| Labyrinthitis                          | 1 (<0.1%)     | 0             | 1 (<0.1%)     |
| Mastoiditis                            | 1 (<0.1%)     | 0             | 1 (<0.1%)     |
| Otitis externa                         | 3 ( 0.2%)     | 0             | 3 ( 0.1%)     |
| Otitis media                           | 2 ( 0.1%)     | 3 ( 0.2%)     | 5 ( 0.2%)     |
| Epstein-Barr viral infections          | 7 ( 0.5%)     | 5 ( 0.3%)     | 12 ( 0.4%)    |
| Epstein-Barr virus infection           | 0             | 1 (<0.1%)     | 1 (<0.1%)     |
| Infectious mononucleosis               | 7 ( 0.5%)     | 4 ( 0.3%)     | 11 ( 0.4%)    |
| Eye and eyelid infections              | 0             | 3 ( 0.2%)     | 3 ( 0.1%)     |
| Conjunctivitis infective               | 0             | 1 (<0.1%)     | 1 (<0.1%)     |
| Hordeolum                              | 0             | 2 ( 0.1%)     | 2 (<0.1%)     |
| Female reproductive tract infections   | 24 ( 1.7%)    | 21 ( 1.4%)    | 45 ( 1.6%)    |
| Cervicitis                             | 3 ( 0.2%)     | 6 ( 0.4%)     | 9 ( 0.3%)     |
| Endometritis decidual                  | 1 (<0.1%)     | 0             | 1 (<0.1%)     |
| Pelvic inflammatory disease            | 2 ( 0.1%)     | 1 (<0.1%)     | 3 ( 0.1%)     |
| Salpingitis                            | 0             | 1 (<0.1%)     | 1 (<0.1%)     |
| Uterine infection                      | 1 (<0.1%)     | 0             | 1 (<0.1%)     |
| Vaginal infection                      | 14 ( 1.0%)    | 12 ( 0.8%)    | 26 ( 0.9%)    |
| Vulval abscess                         | 0             | 1 (<0.1%)     | 1 (<0.1%)     |
| Vulvitis                               | 3 ( 0.2%)     | 0             | 3 ( 0.1%)     |
| Vulvovaginitis                         | 2 ( 0.1%)     | 0             | 2 (<0.1%)     |
| Fungal infections NEC                  | 48 ( 3.4%)    | 55 ( 3.8%)    | 103 ( 3.6%)   |
| Fungal infection                       | 30 ( 2.1%)    | 36 ( 2.5%)    | 66 ( 2.3%)    |
| Fungal skin infection                  | 0             | 1 (<0.1%)     | 1 (<0.1%)     |
| Genital infection fungal               | 1 (<0.1%)     | 1 (<0.1%)     | 2 (<0.1%)     |
| Onychomycosis                          | 1 (<0.1%)     | 0             | 1 (<0.1%)     |
| Vulvovaginal mycotic infection         | 16 ( 1.1%)    | 17 ( 1.2%)    | 33 ( 1.1%)    |
| Gardnerella infections                 | 0             | 2 ( 0.1%)     | 2 (<0.1%)     |
| Gardnerella infection                  | 0             | 1 (<0.1%)     | 1 (<0.1%)     |
| Vaginitis gardnerella                  | 0             | 1 (<0.1%)     | 1 (<0.1%)     |
| Giardia infections                     | 0             | 1 (<0.1%)     | 1 (<0.1%)     |
| Giardiasis                             | 0             | 1 (<0.1%)     | 1 (<0.1%)     |
| Helicobacter infections                | 2 ( 0.1%)     | 0             | 2 (<0.1%)     |
| Helicobacter gastritis                 | 1 (<0.1%)     | 0             | 1 (<0.1%)     |
| Helicobacter infection                 | 1 (<0.1%)     | 0             | 1 (<0.1%)     |

**Table 14.1.1 / 26: Number of subjects with medical history findings by primary system organ class, high level term, preferred term by treatment (FAS)**

| Primary system organ class                  |               |               |               |
|---------------------------------------------|---------------|---------------|---------------|
| High level term                             |               |               |               |
| Preferred term                              | LCS12         | LCS16         | Total         |
| MedDRA Version 14.0                         | N=1432 (100%) | N=1452 (100%) | N=2884 (100%) |
| Hepatitis viral infections                  | 3 ( 0.2%)     | 8 ( 0.6%)     | 11 ( 0.4%)    |
| Hepatitis A                                 | 2 ( 0.1%)     | 8 ( 0.6%)     | 10 ( 0.3%)    |
| Hepatitis B                                 | 1 (<0.1%)     | 0             | 1 (<0.1%)     |
| Herpes viral infections                     | 28 ( 2.0%)    | 28 ( 1.9%)    | 56 ( 1.9%)    |
| Genital herpes                              | 12 ( 0.8%)    | 12 ( 0.8%)    | 24 ( 0.8%)    |
| Herpes ophthalmic                           | 1 (<0.1%)     | 0             | 1 (<0.1%)     |
| Herpes simplex                              | 5 ( 0.3%)     | 5 ( 0.3%)     | 10 ( 0.3%)    |
| Herpes virus infection                      | 0             | 1 (<0.1%)     | 1 (<0.1%)     |
| Herpes zoster                               | 0             | 2 ( 0.1%)     | 2 (<0.1%)     |
| Oral herpes                                 | 6 ( 0.4%)     | 6 ( 0.4%)     | 12 ( 0.4%)    |
| Varicella                                   | 4 ( 0.3%)     | 2 ( 0.1%)     | 6 ( 0.2%)     |
| Infections NEC                              | 5 ( 0.3%)     | 2 ( 0.1%)     | 7 ( 0.2%)     |
| Localised infection                         | 0             | 2 ( 0.1%)     | 2 (<0.1%)     |
| Pelvic infection                            | 1 (<0.1%)     | 0             | 1 (<0.1%)     |
| Postoperative wound infection               | 1 (<0.1%)     | 0             | 1 (<0.1%)     |
| Respiratory tract infection                 | 3 ( 0.2%)     | 0             | 3 ( 0.1%)     |
| Influenza viral infections                  | 4 ( 0.3%)     | 10 ( 0.7%)    | 14 ( 0.5%)    |
| Influenza                                   | 4 ( 0.3%)     | 10 ( 0.7%)    | 14 ( 0.5%)    |
| Lower respiratory tract and lung infections | 16 ( 1.1%)    | 19 ( 1.3%)    | 35 ( 1.2%)    |
| Bronchitis                                  | 5 ( 0.3%)     | 8 ( 0.6%)     | 13 ( 0.5%)    |
| Lower respiratory tract infection           | 0             | 1 (<0.1%)     | 1 (<0.1%)     |
| Pneumonia                                   | 11 ( 0.8%)    | 11 ( 0.8%)    | 22 ( 0.8%)    |
| Mycoplasma infections                       | 0             | 1 (<0.1%)     | 1 (<0.1%)     |
| Pneumonia mycoplasmal                       | 0             | 1 (<0.1%)     | 1 (<0.1%)     |
| Neisseria infections                        | 6 ( 0.4%)     | 4 ( 0.3%)     | 10 ( 0.3%)    |
| Gonorrhoea                                  | 6 ( 0.4%)     | 4 ( 0.3%)     | 10 ( 0.3%)    |
| Papilloma viral infections                  | 29 ( 2.0%)    | 13 ( 0.9%)    | 42 ( 1.5%)    |
| Anogenital warts                            | 28 ( 2.0%)    | 11 ( 0.8%)    | 39 ( 1.4%)    |
| Papilloma viral infection                   | 1 (<0.1%)     | 2 ( 0.1%)     | 3 ( 0.1%)     |
| Rubella viral infections                    | 1 (<0.1%)     | 0             | 1 (<0.1%)     |
| Rubella                                     | 1 (<0.1%)     | 0             | 1 (<0.1%)     |
| Salmonella infections                       | 2 ( 0.1%)     | 1 (<0.1%)     | 3 ( 0.1%)     |
| Gastroenteritis salmonella                  | 1 (<0.1%)     | 0             | 1 (<0.1%)     |
| Paratyphoid fever                           | 0             | 1 (<0.1%)     | 1 (<0.1%)     |
| Typhoid fever                               | 1 (<0.1%)     | 0             | 1 (<0.1%)     |
| Skin structures and soft tissue infections  | 2 ( 0.1%)     | 4 ( 0.3%)     | 6 ( 0.2%)     |
| Eczema infected                             | 1 (<0.1%)     | 0             | 1 (<0.1%)     |
| Paronychia                                  | 0             | 1 (<0.1%)     | 1 (<0.1%)     |
| Pilonidal cyst                              | 1 (<0.1%)     | 1 (<0.1%)     | 2 (<0.1%)     |
| Pseudofolliculitis barbae                   | 0             | 1 (<0.1%)     | 1 (<0.1%)     |
| Skin infection                              | 0             | 1 (<0.1%)     | 1 (<0.1%)     |

**Table 14.1.1 / 26: Number of subjects with medical history findings by primary system organ class, high level term, preferred term by treatment (FAS)**

| Primary system organ class         | LCS12         | LCS16         | Total         |
|------------------------------------|---------------|---------------|---------------|
| High level term                    | N=1432 (100%) | N=1452 (100%) | N=2884 (100%) |
| Preferred term                     |               |               |               |
| MedDRA Version 14.0                |               |               |               |
| Staphylococcal infections          | 0             | 2 ( 0.1%)     | 2 ( <0.1%)    |
| Staphylococcal infection           | 0             | 2 ( 0.1%)     | 2 ( <0.1%)    |
| Streptococcal infections           | 3 ( 0.2%)     | 12 ( 0.8%)    | 15 ( 0.5%)    |
| Pharyngitis streptococcal          | 3 ( 0.2%)     | 7 ( 0.5%)     | 10 ( 0.3%)    |
| Scarlet fever                      | 0             | 3 ( 0.2%)     | 3 ( 0.1%)     |
| Vulvovaginitis streptococcal       | 0             | 2 ( 0.1%)     | 2 ( <0.1%)    |
| Tinea infections                   | 3 ( 0.2%)     | 2 ( 0.1%)     | 5 ( 0.2%)     |
| Tinea infection                    | 1 ( <0.1%)    | 1 ( <0.1%)    | 2 ( <0.1%)    |
| Tinea pedis                        | 1 ( <0.1%)    | 0             | 1 ( <0.1%)    |
| Tinea versicolour                  | 1 ( <0.1%)    | 1 ( <0.1%)    | 2 ( <0.1%)    |
| Treponema infections               | 0             | 1 ( <0.1%)    | 1 ( <0.1%)    |
| Syphilis                           | 0             | 1 ( <0.1%)    | 1 ( <0.1%)    |
| Trichomonas infections             | 3 ( 0.2%)     | 5 ( 0.3%)     | 8 ( 0.3%)     |
| Cervicitis trichomonal             | 1 ( <0.1%)    | 0             | 1 ( <0.1%)    |
| Trichomoniasis                     | 0             | 2 ( 0.1%)     | 2 ( <0.1%)    |
| Vulvovaginitis trichomonal         | 2 ( 0.1%)     | 3 ( 0.2%)     | 5 ( 0.2%)     |
| Tuberculous infections             | 0             | 3 ( 0.2%)     | 3 ( 0.1%)     |
| Lymph node tuberculosis            | 0             | 1 ( <0.1%)    | 1 ( <0.1%)    |
| Tuberculosis                       | 0             | 3 ( 0.2%)     | 3 ( 0.1%)     |
| Upper respiratory tract infections | 76 ( 5.3%)    | 65 ( 4.5%)    | 141 ( 4.9%)   |
| Acute tonsillitis                  | 1 ( <0.1%)    | 1 ( <0.1%)    | 2 ( <0.1%)    |
| Chronic sinusitis                  | 7 ( 0.5%)     | 2 ( 0.1%)     | 9 ( 0.3%)     |
| Chronic tonsillitis                | 6 ( 0.4%)     | 6 ( 0.4%)     | 12 ( 0.4%)    |
| Laryngitis                         | 1 ( <0.1%)    | 1 ( <0.1%)    | 2 ( <0.1%)    |
| Nasopharyngitis                    | 12 ( 0.8%)    | 7 ( 0.5%)     | 19 ( 0.7%)    |
| Peritonsillar abscess              | 0             | 1 ( <0.1%)    | 1 ( <0.1%)    |
| Peritonsillitis                    | 0             | 1 ( <0.1%)    | 1 ( <0.1%)    |
| Pharyngitis                        | 2 ( 0.1%)     | 2 ( 0.1%)     | 4 ( 0.1%)     |
| Rhinitis                           | 1 ( <0.1%)    | 0             | 1 ( <0.1%)    |
| Sinobronchitis                     | 0             | 1 ( <0.1%)    | 1 ( <0.1%)    |
| Sinusitis                          | 25 ( 1.7%)    | 19 ( 1.3%)    | 44 ( 1.5%)    |
| Tonsillitis                        | 22 ( 1.5%)    | 18 ( 1.2%)    | 40 ( 1.4%)    |
| Upper respiratory tract infection  | 5 ( 0.3%)     | 7 ( 0.5%)     | 12 ( 0.4%)    |
| Urinary tract infections           | 79 ( 5.5%)    | 77 ( 5.3%)    | 156 ( 5.4%)   |
| Cystitis                           | 9 ( 0.6%)     | 9 ( 0.6%)     | 18 ( 0.6%)    |
| Kidney infection                   | 7 ( 0.5%)     | 11 ( 0.8%)    | 18 ( 0.6%)    |
| Pyelonephritis                     | 4 ( 0.3%)     | 0             | 4 ( 0.1%)     |
| Pyelonephritis acute               | 0             | 1 ( <0.1%)    | 1 ( <0.1%)    |
| Urethritis                         | 1 ( <0.1%)    | 0             | 1 ( <0.1%)    |
| Urinary tract infection            | 65 ( 4.5%)    | 57 ( 3.9%)    | 122 ( 4.2%)   |

**Table 14.1.1 / 26: Number of subjects with medical history findings by primary system organ class, high level term, preferred term by treatment (FAS)**

| Primary system organ class                     |               |               |               |
|------------------------------------------------|---------------|---------------|---------------|
| High level term                                |               |               |               |
| Preferred term                                 | LCS12         | LCS16         | Total         |
| MedDRA Version 14.0                            | N=1432 (100%) | N=1452 (100%) | N=2884 (100%) |
| Viral infections NEC                           | 3 ( 0.2%)     | 4 ( 0.3%)     | 7 ( 0.2%)     |
| Gastroenteritis viral                          | 0             | 1 (<0.1%)     | 1 (<0.1%)     |
| Genital infection viral                        | 2 ( 0.1%)     | 1 (<0.1%)     | 3 ( 0.1%)     |
| Meningitis viral                               | 1 (<0.1%)     | 2 ( 0.1%)     | 3 ( 0.1%)     |
| Injury, poisoning and procedural complications | 68 ( 4.7%)    | 95 ( 6.5%)    | 163 ( 5.7%)   |
| Abdominal injuries NEC                         | 1 (<0.1%)     | 0             | 1 (<0.1%)     |
| Splenic rupture                                | 1 (<0.1%)     | 0             | 1 (<0.1%)     |
| Cerebral injuries NEC                          | 3 ( 0.2%)     | 4 ( 0.3%)     | 7 ( 0.2%)     |
| Brain contusion                                | 0             | 1 (<0.1%)     | 1 (<0.1%)     |
| Concussion                                     | 2 ( 0.1%)     | 3 ( 0.2%)     | 5 ( 0.2%)     |
| Traumatic brain injury                         | 1 (<0.1%)     | 0             | 1 (<0.1%)     |
| Chest and lung injuries NEC                    | 1 (<0.1%)     | 0             | 1 (<0.1%)     |
| Collapse of lung                               | 1 (<0.1%)     | 0             | 1 (<0.1%)     |
| Fractures and dislocations NEC                 | 2 ( 0.1%)     | 6 ( 0.4%)     | 8 ( 0.3%)     |
| Avulsion fracture                              | 0             | 1 (<0.1%)     | 1 (<0.1%)     |
| Joint dislocation                              | 2 ( 0.1%)     | 5 ( 0.3%)     | 7 ( 0.2%)     |
| Limb injuries NEC (incl traumatic amputation)  | 13 ( 0.9%)    | 15 ( 1.0%)    | 28 ( 1.0%)    |
| Cartilage injury                               | 0             | 1 (<0.1%)     | 1 (<0.1%)     |
| Joint injury                                   | 3 ( 0.2%)     | 2 ( 0.1%)     | 5 ( 0.2%)     |
| Joint sprain                                   | 4 ( 0.3%)     | 6 ( 0.4%)     | 10 ( 0.3%)    |
| Limb injury                                    | 4 ( 0.3%)     | 1 (<0.1%)     | 5 ( 0.2%)     |
| Meniscus lesion                                | 2 ( 0.1%)     | 5 ( 0.3%)     | 7 ( 0.2%)     |
| Synovial rupture                               | 0             | 1 (<0.1%)     | 1 (<0.1%)     |
| Lower limb fractures and dislocations          | 11 ( 0.8%)    | 20 ( 1.4%)    | 31 ( 1.1%)    |
| Ankle fracture                                 | 2 ( 0.1%)     | 7 ( 0.5%)     | 9 ( 0.3%)     |
| Fibula fracture                                | 0             | 1 (<0.1%)     | 1 (<0.1%)     |
| Foot fracture                                  | 6 ( 0.4%)     | 6 ( 0.4%)     | 12 ( 0.4%)    |
| Hip fracture                                   | 0             | 2 ( 0.1%)     | 2 (<0.1%)     |
| Lower limb fracture                            | 3 ( 0.2%)     | 4 ( 0.3%)     | 7 ( 0.2%)     |
| Tibia fracture                                 | 0             | 1 (<0.1%)     | 1 (<0.1%)     |
| Muscle, tendon and ligament injuries           | 2 ( 0.1%)     | 13 ( 0.9%)    | 15 ( 0.5%)    |
| Ligament rupture                               | 1 (<0.1%)     | 6 ( 0.4%)     | 7 ( 0.2%)     |
| Muscle injury                                  | 0             | 2 ( 0.1%)     | 2 (<0.1%)     |
| Tendon injury                                  | 0             | 1 (<0.1%)     | 1 (<0.1%)     |
| Tendon rupture                                 | 1 (<0.1%)     | 1 (<0.1%)     | 2 (<0.1%)     |
| Whiplash injury                                | 0             | 3 ( 0.2%)     | 3 ( 0.1%)     |



**Table 14.1.1 / 26: Number of subjects with medical history findings by primary system organ class, high level term, preferred term by treatment (FAS)**

| Primary system organ class                              | LCS12         | LCS16         | Total         |
|---------------------------------------------------------|---------------|---------------|---------------|
| High level term                                         | N=1432 (100%) | N=1452 (100%) | N=2884 (100%) |
| Preferred term                                          |               |               |               |
| MedDRA Version 14.0                                     |               |               |               |
| Non-site specific injuries NEC                          | 6 ( 0.4%)     | 5 ( 0.3%)     | 11 ( 0.4%)    |
| Animal bite                                             | 1 (<0.1%)     | 0             | 1 (<0.1%)     |
| Arthropod bite                                          | 2 ( 0.1%)     | 0             | 2 (<0.1%)     |
| Foreign body                                            | 0             | 1 (<0.1%)     | 1 (<0.1%)     |
| Injury                                                  | 0             | 2 ( 0.1%)     | 2 (<0.1%)     |
| Road traffic accident                                   | 1 (<0.1%)     | 2 ( 0.1%)     | 3 ( 0.1%)     |
| Traumatic haematoma                                     | 1 (<0.1%)     | 0             | 1 (<0.1%)     |
| Wound                                                   | 1 (<0.1%)     | 0             | 1 (<0.1%)     |
| Non-site specific procedural complications              | 1 (<0.1%)     | 0             | 1 (<0.1%)     |
| Post procedural complication                            | 1 (<0.1%)     | 0             | 1 (<0.1%)     |
| Pelvic fractures and dislocations                       | 0             | 1 (<0.1%)     | 1 (<0.1%)     |
| Pelvic fracture                                         | 0             | 1 (<0.1%)     | 1 (<0.1%)     |
| Peripheral nerve injuries                               | 1 (<0.1%)     | 0             | 1 (<0.1%)     |
| Sciatic nerve injury                                    | 1 (<0.1%)     | 0             | 1 (<0.1%)     |
| Reproductive system and breast injuries                 | 1 (<0.1%)     | 0             | 1 (<0.1%)     |
| Uterine rupture                                         | 1 (<0.1%)     | 0             | 1 (<0.1%)     |
| Reproductive tract and breast procedural complications  | 1 (<0.1%)     | 0             | 1 (<0.1%)     |
| Uterine perforation                                     | 1 (<0.1%)     | 0             | 1 (<0.1%)     |
| Site specific injuries NEC                              | 2 ( 0.1%)     | 6 ( 0.4%)     | 8 ( 0.3%)     |
| Face injury                                             | 1 (<0.1%)     | 0             | 1 (<0.1%)     |
| Head injury                                             | 0             | 4 ( 0.3%)     | 4 ( 0.1%)     |
| Neck injury                                             | 1 (<0.1%)     | 0             | 1 (<0.1%)     |
| Spinal column injury                                    | 0             | 1 (<0.1%)     | 1 (<0.1%)     |
| Tooth injury                                            | 0             | 1 (<0.1%)     | 1 (<0.1%)     |
| Skin injuries NEC                                       | 2 ( 0.1%)     | 1 (<0.1%)     | 3 ( 0.1%)     |
| Contusion                                               | 2 ( 0.1%)     | 1 (<0.1%)     | 3 ( 0.1%)     |
| Skull fractures, facial bone fractures and dislocations | 4 ( 0.3%)     | 4 ( 0.3%)     | 8 ( 0.3%)     |
| Facial bones fracture                                   | 3 ( 0.2%)     | 4 ( 0.3%)     | 7 ( 0.2%)     |
| Jaw fracture                                            | 1 (<0.1%)     | 0             | 1 (<0.1%)     |
| Spinal fractures and dislocations                       | 3 ( 0.2%)     | 2 ( 0.1%)     | 5 ( 0.2%)     |
| Cervical vertebral fracture                             | 1 (<0.1%)     | 1 (<0.1%)     | 2 (<0.1%)     |
| Dislocation of vertebra                                 | 0             | 1 (<0.1%)     | 1 (<0.1%)     |
| Fractured coccyx                                        | 1 (<0.1%)     | 0             | 1 (<0.1%)     |
| Lumbar vertebral fracture                               | 1 (<0.1%)     | 0             | 1 (<0.1%)     |
| Spinal fracture                                         | 0             | 1 (<0.1%)     | 1 (<0.1%)     |
| Thermal burns                                           | 1 (<0.1%)     | 2 ( 0.1%)     | 3 ( 0.1%)     |
| Thermal burn                                            | 1 (<0.1%)     | 2 ( 0.1%)     | 3 ( 0.1%)     |
| Thoracic cage fractures and dislocations                | 2 ( 0.1%)     | 2 ( 0.1%)     | 4 ( 0.1%)     |
| Rib fracture                                            | 2 ( 0.1%)     | 2 ( 0.1%)     | 4 ( 0.1%)     |

**Table 14.1.1 / 26: Number of subjects with medical history findings by primary system organ class, high level term, preferred term by treatment (FAS)**

| Primary system organ class                               | LCS12         | LCS16         | Total         |
|----------------------------------------------------------|---------------|---------------|---------------|
| High level term                                          | N=1432 (100%) | N=1452 (100%) | N=2884 (100%) |
| Preferred term                                           |               |               |               |
| MedDRA Version 14.0                                      |               |               |               |
| Upper limb fractures and dislocations                    | 22 ( 1.5%)    | 31 ( 2.1%)    | 53 ( 1.8%)    |
| Clavicle fracture                                        | 2 ( 0.1%)     | 3 ( 0.2%)     | 5 ( 0.2%)     |
| Forearm fracture                                         | 1 (<0.1%)     | 1 (<0.1%)     | 2 (<0.1%)     |
| Hand fracture                                            | 3 ( 0.2%)     | 4 ( 0.3%)     | 7 ( 0.2%)     |
| Humerus fracture                                         | 1 (<0.1%)     | 2 ( 0.1%)     | 3 ( 0.1%)     |
| Radius fracture                                          | 1 (<0.1%)     | 0             | 1 (<0.1%)     |
| Ulna fracture                                            | 2 ( 0.1%)     | 0             | 2 (<0.1%)     |
| Upper limb fracture                                      | 8 ( 0.6%)     | 13 ( 0.9%)    | 21 ( 0.7%)    |
| Wrist fracture                                           | 5 ( 0.3%)     | 8 ( 0.6%)     | 13 ( 0.5%)    |
| Investigations                                           | 136 ( 9.5%)   | 130 ( 9.0%)   | 266 ( 9.2%)   |
| Bacteria identification and serology (excl mycobacteria) | 7 ( 0.5%)     | 4 ( 0.3%)     | 11 ( 0.4%)    |
| Chlamydia test positive                                  | 7 ( 0.5%)     | 3 ( 0.2%)     | 10 ( 0.3%)    |
| Streptococcus test positive                              | 0             | 1 (<0.1%)     | 1 (<0.1%)     |
| Cardiac auscultatory investigations                      | 7 ( 0.5%)     | 2 ( 0.1%)     | 9 ( 0.3%)     |
| Cardiac murmur                                           | 7 ( 0.5%)     | 2 ( 0.1%)     | 9 ( 0.3%)     |
| Cell marker procedures                                   | 0             | 1 (<0.1%)     | 1 (<0.1%)     |
| Leukocyte antigen B-27 positive                          | 0             | 1 (<0.1%)     | 1 (<0.1%)     |
| Cholesterol analyses                                     | 1 (<0.1%)     | 0             | 1 (<0.1%)     |
| Blood cholesterol increased                              | 1 (<0.1%)     | 0             | 1 (<0.1%)     |
| Gastrointestinal and abdominal imaging procedures        | 18 ( 1.3%)    | 18 ( 1.2%)    | 36 ( 1.2%)    |
| Colonoscopy                                              | 1 (<0.1%)     | 5 ( 0.3%)     | 6 ( 0.2%)     |
| Endoscopy upper gastrointestinal tract                   | 1 (<0.1%)     | 1 (<0.1%)     | 2 (<0.1%)     |
| Laparoscopy                                              | 16 ( 1.1%)    | 12 ( 0.8%)    | 28 ( 1.0%)    |
| Oesophagogastroscopy                                     | 0             | 1 (<0.1%)     | 1 (<0.1%)     |
| Heart rate and pulse investigations                      | 1 (<0.1%)     | 2 ( 0.1%)     | 3 ( 0.1%)     |
| Heart rate increased                                     | 0             | 2 ( 0.1%)     | 2 (<0.1%)     |
| Heart rate irregular                                     | 1 (<0.1%)     | 0             | 1 (<0.1%)     |
| Hepatobiliary imaging procedures                         | 0             | 1 (<0.1%)     | 1 (<0.1%)     |
| Endoscopic retrograde cholangiopancreatography           | 0             | 1 (<0.1%)     | 1 (<0.1%)     |
| Histopathology procedures NEC                            | 0             | 1 (<0.1%)     | 1 (<0.1%)     |
| Biopsy site unspecified normal                           | 0             | 1 (<0.1%)     | 1 (<0.1%)     |
| Imaging procedures NEC                                   | 2 ( 0.1%)     | 1 (<0.1%)     | 3 ( 0.1%)     |
| Endoscopy                                                | 2 ( 0.1%)     | 1 (<0.1%)     | 3 ( 0.1%)     |
| Investigations NEC                                       | 0             | 1 (<0.1%)     | 1 (<0.1%)     |
| Paracentesis                                             | 0             | 1 (<0.1%)     | 1 (<0.1%)     |
| Liver function analyses                                  | 1 (<0.1%)     | 0             | 1 (<0.1%)     |
| Gamma-glutamyltransferase increased                      | 1 (<0.1%)     | 0             | 1 (<0.1%)     |
| Mineral and electrolyte analyses                         | 1 (<0.1%)     | 1 (<0.1%)     | 2 (<0.1%)     |
| Blood iron decreased                                     | 1 (<0.1%)     | 1 (<0.1%)     | 2 (<0.1%)     |
| Musculoskeletal and soft tissue imaging procedures       | 10 ( 0.7%)    | 12 ( 0.8%)    | 22 ( 0.8%)    |
| Arthroscopy                                              | 10 ( 0.7%)    | 12 ( 0.8%)    | 22 ( 0.8%)    |

**Table 14.1.1 / 26: Number of subjects with medical history findings by primary system organ class, high level term, preferred term by treatment (FAS)**

| Primary system organ class                                            | LCS12         | LCS16         | Total         |
|-----------------------------------------------------------------------|---------------|---------------|---------------|
| High level term                                                       | N=1432 (100%) | N=1452 (100%) | N=2884 (100%) |
| Preferred term                                                        |               |               |               |
| MedDRA Version 14.0                                                   |               |               |               |
| Physical examination procedures                                       | 1 ( <0.1%)    | 2 ( 0.1%)     | 3 ( 0.1%)     |
| Weight decreased                                                      | 1 ( <0.1%)    | 1 ( <0.1%)    | 2 ( <0.1%)    |
| Weight increased                                                      | 0             | 1 ( <0.1%)    | 1 ( <0.1%)    |
| Red blood cell analyses                                               | 1 ( <0.1%)    | 0             | 1 ( <0.1%)    |
| Haemoglobin decreased                                                 | 1 ( <0.1%)    | 0             | 1 ( <0.1%)    |
| Reproductive hormone analyses                                         | 1 ( <0.1%)    | 0             | 1 ( <0.1%)    |
| Blood testosterone increased                                          | 1 ( <0.1%)    | 0             | 1 ( <0.1%)    |
| Reproductive organ and breast histopathology procedures               | 62 ( 4.3%)    | 56 ( 3.9%)    | 118 ( 4.1%)   |
| Aspiration breast                                                     | 0             | 1 ( <0.1%)    | 1 ( <0.1%)    |
| Biopsy breast                                                         | 3 ( 0.2%)     | 4 ( 0.3%)     | 7 ( 0.2%)     |
| Biopsy breast normal                                                  | 1 ( <0.1%)    | 0             | 1 ( <0.1%)    |
| Biopsy cervix                                                         | 8 ( 0.6%)     | 7 ( 0.5%)     | 15 ( 0.5%)    |
| Smear cervix abnormal                                                 | 56 ( 3.9%)    | 44 ( 3.0%)    | 100 ( 3.5%)   |
| Smear cervix normal                                                   | 0             | 2 ( 0.1%)     | 2 ( <0.1%)    |
| Reproductive organ and breast imaging procedures                      | 28 ( 2.0%)    | 29 ( 2.0%)    | 57 ( 2.0%)    |
| Colposcopy                                                            | 27 ( 1.9%)    | 24 ( 1.7%)    | 51 ( 1.8%)    |
| Colposcopy normal                                                     | 0             | 1 ( <0.1%)    | 1 ( <0.1%)    |
| Hysteroscopy                                                          | 1 ( <0.1%)    | 3 ( 0.2%)     | 4 ( 0.1%)     |
| Mammogram abnormal                                                    | 0             | 1 ( <0.1%)    | 1 ( <0.1%)    |
| Thyroid histopathology procedures                                     | 0             | 1 ( <0.1%)    | 1 ( <0.1%)    |
| Biopsy thyroid gland                                                  | 0             | 1 ( <0.1%)    | 1 ( <0.1%)    |
| Urinary tract histopathology procedures                               | 1 ( <0.1%)    | 0             | 1 ( <0.1%)    |
| Biopsy kidney                                                         | 1 ( <0.1%)    | 0             | 1 ( <0.1%)    |
| Urinary tract imaging procedures                                      | 0             | 1 ( <0.1%)    | 1 ( <0.1%)    |
| Cystoscopy                                                            | 0             | 1 ( <0.1%)    | 1 ( <0.1%)    |
| Virus identification and serology                                     | 28 ( 2.0%)    | 30 ( 2.1%)    | 58 ( 2.0%)    |
| Human papilloma virus test negative                                   | 0             | 1 ( <0.1%)    | 1 ( <0.1%)    |
| Human papilloma virus test positive                                   | 28 ( 2.0%)    | 29 ( 2.0%)    | 57 ( 2.0%)    |
| Vitamin analyses                                                      | 0             | 1 ( <0.1%)    | 1 ( <0.1%)    |
| Vitamin B12 decreased                                                 | 0             | 1 ( <0.1%)    | 1 ( <0.1%)    |
| Metabolism and nutrition disorders                                    | 24 ( 1.7%)    | 23 ( 1.6%)    | 47 ( 1.6%)    |
| Appetite disorders                                                    | 1 ( <0.1%)    | 1 ( <0.1%)    | 2 ( <0.1%)    |
| Decreased appetite                                                    | 1 ( <0.1%)    | 1 ( <0.1%)    | 2 ( <0.1%)    |
| Diabetes mellitus (incl subtypes)                                     | 4 ( 0.3%)     | 10 ( 0.7%)    | 14 ( 0.5%)    |
| Gestational diabetes                                                  | 4 ( 0.3%)     | 10 ( 0.7%)    | 14 ( 0.5%)    |
| Elevated cholesterol                                                  | 4 ( 0.3%)     | 3 ( 0.2%)     | 7 ( 0.2%)     |
| Hypercholesterolaemia                                                 | 4 ( 0.3%)     | 3 ( 0.2%)     | 7 ( 0.2%)     |
| Food malabsorption and intolerance syndromes (excl sugar intolerance) | 1 ( <0.1%)    | 0             | 1 ( <0.1%)    |
| Food intolerance                                                      | 1 ( <0.1%)    | 0             | 1 ( <0.1%)    |

**Table 14.1.1 / 26: Number of subjects with medical history findings by primary system organ class, high level term, preferred term by treatment (FAS)**

| Primary system organ class                             | LCS12             | LCS16             | Total              |
|--------------------------------------------------------|-------------------|-------------------|--------------------|
| High level term                                        | N=1432 (100%)     | N=1452 (100%)     | N=2884 (100%)      |
| Preferred term                                         |                   |                   |                    |
| MedDRA Version 14.0                                    |                   |                   |                    |
| General nutritional disorders NEC                      | 3 ( 0.2%)         | 1 ( <0.1%)        | 4 ( 0.1%)          |
| Obesity                                                | 2 ( 0.1%)         | 1 ( <0.1%)        | 3 ( 0.1%)          |
| Overweight                                             | 1 ( <0.1%)        | 0                 | 1 ( <0.1%)         |
| Hyperglycaemic conditions NEC                          | 1 ( <0.1%)        | 0                 | 1 ( <0.1%)         |
| Glucose tolerance impaired                             | 1 ( <0.1%)        | 0                 | 1 ( <0.1%)         |
| Hyperlipidaemias NEC                                   | 1 ( <0.1%)        | 0                 | 1 ( <0.1%)         |
| Hyperlipidaemia                                        | 1 ( <0.1%)        | 0                 | 1 ( <0.1%)         |
| Hypoglycaemic conditions NEC                           | 2 ( 0.1%)         | 1 ( <0.1%)        | 3 ( 0.1%)          |
| Hypoglycaemia                                          | 1 ( <0.1%)        | 1 ( <0.1%)        | 2 ( <0.1%)         |
| Hypoglycaemic seizure                                  | 1 ( <0.1%)        | 0                 | 1 ( <0.1%)         |
| Lipid metabolism and deposit disorders NEC             | 1 ( <0.1%)        | 1 ( <0.1%)        | 2 ( <0.1%)         |
| Body fat disorder                                      | 0                 | 1 ( <0.1%)        | 1 ( <0.1%)         |
| Dyslipidaemia                                          | 1 ( <0.1%)        | 0                 | 1 ( <0.1%)         |
| Sugar intolerance (excl glucose intolerance)           | 6 ( 0.4%)         | 4 ( 0.3%)         | 10 ( 0.3%)         |
| Lactose intolerance                                    | 6 ( 0.4%)         | 4 ( 0.3%)         | 10 ( 0.3%)         |
| Total fluid volume increased                           | 1 ( <0.1%)        | 2 ( 0.1%)         | 3 ( 0.1%)          |
| Fluid retention                                        | 1 ( <0.1%)        | 2 ( 0.1%)         | 3 ( 0.1%)          |
| <b>Musculoskeletal and connective tissue disorders</b> | <b>87 ( 6.1%)</b> | <b>90 ( 6.2%)</b> | <b>177 ( 6.1%)</b> |
| Arthropathies NEC                                      | 5 ( 0.3%)         | 0                 | 5 ( 0.2%)          |
| Arthritis                                              | 2 ( 0.1%)         | 0                 | 2 ( <0.1%)         |
| Arthritis reactive                                     | 1 ( <0.1%)        | 0                 | 1 ( <0.1%)         |
| Arthropathy                                            | 1 ( <0.1%)        | 0                 | 1 ( <0.1%)         |
| Sacroiliitis                                           | 1 ( <0.1%)        | 0                 | 1 ( <0.1%)         |
| Bone disorders NEC                                     | 1 ( <0.1%)        | 0                 | 1 ( <0.1%)         |
| Osteonecrosis                                          | 1 ( <0.1%)        | 0                 | 1 ( <0.1%)         |
| Bone related signs and symptoms                        | 0                 | 1 ( <0.1%)        | 1 ( <0.1%)         |
| Pain in jaw                                            | 0                 | 1 ( <0.1%)        | 1 ( <0.1%)         |
| Bursal disorders                                       | 3 ( 0.2%)         | 2 ( 0.1%)         | 5 ( 0.2%)          |
| Bunion                                                 | 2 ( 0.1%)         | 0                 | 2 ( <0.1%)         |
| Bursitis                                               | 1 ( <0.1%)        | 2 ( 0.1%)         | 3 ( 0.1%)          |
| Cartilage disorders                                    | 4 ( 0.3%)         | 1 ( <0.1%)        | 5 ( 0.2%)          |
| Cartilage hypertrophy                                  | 1 ( <0.1%)        | 0                 | 1 ( <0.1%)         |
| Costochondritis                                        | 0                 | 1 ( <0.1%)        | 1 ( <0.1%)         |
| Osteochondrosis                                        | 3 ( 0.2%)         | 0                 | 3 ( 0.1%)          |
| Connective tissue disorders (excl LE)                  | 0                 | 1 ( <0.1%)        | 1 ( <0.1%)         |
| Scleroderma                                            | 0                 | 1 ( <0.1%)        | 1 ( <0.1%)         |
| Extremity deformities                                  | 2 ( 0.1%)         | 2 ( 0.1%)         | 4 ( 0.1%)          |
| Foot deformity                                         | 1 ( <0.1%)        | 2 ( 0.1%)         | 3 ( 0.1%)          |
| Knee deformity                                         | 1 ( <0.1%)        | 0                 | 1 ( <0.1%)         |

**Table 14.1.1 / 26: Number of subjects with medical history findings by primary system organ class, high level term, preferred term by treatment (FAS)**

| Primary system organ class                                             | LCS12         | LCS16         | Total         |
|------------------------------------------------------------------------|---------------|---------------|---------------|
| High level term                                                        |               |               |               |
| Preferred term                                                         |               |               |               |
| MedDRA Version 14.0                                                    | N=1432 (100%) | N=1452 (100%) | N=2884 (100%) |
| Intervertebral disc disorders NEC                                      | 3 ( 0.2%)     | 6 ( 0.4%)     | 9 ( 0.3%)     |
| Intervertebral disc degeneration                                       | 1 (<0.1%)     | 0             | 1 (<0.1%)     |
| Intervertebral disc displacement                                       | 0             | 1 (<0.1%)     | 1 (<0.1%)     |
| Intervertebral disc protrusion                                         | 2 ( 0.1%)     | 5 ( 0.3%)     | 7 ( 0.2%)     |
| Joint related disorders NEC                                            | 6 ( 0.4%)     | 5 ( 0.3%)     | 11 ( 0.4%)    |
| Chondromalacia                                                         | 0             | 1 (<0.1%)     | 1 (<0.1%)     |
| Joint instability                                                      | 1 (<0.1%)     | 0             | 1 (<0.1%)     |
| Patellofemoral pain syndrome                                           | 1 (<0.1%)     | 2 ( 0.1%)     | 3 ( 0.1%)     |
| Rotator cuff syndrome                                                  | 0             | 1 (<0.1%)     | 1 (<0.1%)     |
| Temporomandibular joint syndrome                                       | 4 ( 0.3%)     | 1 (<0.1%)     | 5 ( 0.2%)     |
| Joint related signs and symptoms                                       | 15 ( 1.0%)    | 18 ( 1.2%)    | 33 ( 1.1%)    |
| Arthralgia                                                             | 15 ( 1.0%)    | 18 ( 1.2%)    | 33 ( 1.1%)    |
| Ligament disorders                                                     | 0             | 1 (<0.1%)     | 1 (<0.1%)     |
| Ligament calcification                                                 | 0             | 1 (<0.1%)     | 1 (<0.1%)     |
| Muscle infections and inflammations                                    | 1 (<0.1%)     | 0             | 1 (<0.1%)     |
| Myositis                                                               | 1 (<0.1%)     | 0             | 1 (<0.1%)     |
| Muscle pains                                                           | 7 ( 0.5%)     | 5 ( 0.3%)     | 12 ( 0.4%)    |
| Fibromyalgia                                                           | 1 (<0.1%)     | 1 (<0.1%)     | 2 (<0.1%)     |
| Myalgia                                                                | 7 ( 0.5%)     | 4 ( 0.3%)     | 11 ( 0.4%)    |
| Muscle related signs and symptoms NEC                                  | 8 ( 0.6%)     | 7 ( 0.5%)     | 15 ( 0.5%)    |
| Muscle disorder                                                        | 0             | 1 (<0.1%)     | 1 (<0.1%)     |
| Muscle spasms                                                          | 3 ( 0.2%)     | 5 ( 0.3%)     | 8 ( 0.3%)     |
| Muscle tightness                                                       | 5 ( 0.3%)     | 1 (<0.1%)     | 6 ( 0.2%)     |
| Muscle weakness conditions                                             | 1 (<0.1%)     | 0             | 1 (<0.1%)     |
| Muscular weakness                                                      | 1 (<0.1%)     | 0             | 1 (<0.1%)     |
| Musculoskeletal and connective tissue infections and inflammations NEC | 1 (<0.1%)     | 2 ( 0.1%)     | 3 ( 0.1%)     |
| Plantar fasciitis                                                      | 1 (<0.1%)     | 2 ( 0.1%)     | 3 ( 0.1%)     |
| Musculoskeletal and connective tissue pain and discomfort              | 31 ( 2.2%)    | 37 ( 2.5%)    | 68 ( 2.4%)    |
| Back pain                                                              | 22 ( 1.5%)    | 32 ( 2.2%)    | 54 ( 1.9%)    |
| Musculoskeletal discomfort                                             | 1 (<0.1%)     | 0             | 1 (<0.1%)     |
| Musculoskeletal pain                                                   | 4 ( 0.3%)     | 4 ( 0.3%)     | 8 ( 0.3%)     |
| Neck pain                                                              | 1 (<0.1%)     | 1 (<0.1%)     | 2 (<0.1%)     |
| Pain in extremity                                                      | 4 ( 0.3%)     | 3 ( 0.2%)     | 7 ( 0.2%)     |
| Musculoskeletal and connective tissue signs and symptoms NEC           | 1 (<0.1%)     | 0             | 1 (<0.1%)     |
| Back disorder                                                          | 1 (<0.1%)     | 0             | 1 (<0.1%)     |
| Osteoarthropathies                                                     | 1 (<0.1%)     | 3 ( 0.2%)     | 4 ( 0.1%)     |
| Osteoarthritis                                                         | 1 (<0.1%)     | 2 ( 0.1%)     | 3 ( 0.1%)     |
| Spinal osteoarthritis                                                  | 0             | 1 (<0.1%)     | 1 (<0.1%)     |
| Rheumatoid arthropathies                                               | 2 ( 0.1%)     | 2 ( 0.1%)     | 4 ( 0.1%)     |
| Juvenile arthritis                                                     | 2 ( 0.1%)     | 1 (<0.1%)     | 3 ( 0.1%)     |
| Rheumatoid arthritis                                                   | 0             | 1 (<0.1%)     | 1 (<0.1%)     |

**Table 14.1.1 / 26: Number of subjects with medical history findings by primary system organ class, high level term, preferred term by treatment (FAS)**

| Primary system organ class                                          |               |               |               |
|---------------------------------------------------------------------|---------------|---------------|---------------|
| High level term                                                     |               |               |               |
| Preferred term                                                      | LCS12         | LCS16         | Total         |
| MedDRA Version 14.0                                                 | N=1432 (100%) | N=1452 (100%) | N=2884 (100%) |
| Soft tissue disorders NEC                                           | 0             | 1 (<0.1%)     | 1 (<0.1%)     |
| Neck mass                                                           | 0             | 1 (<0.1%)     | 1 (<0.1%)     |
| Spine and neck deformities                                          | 2 ( 0.1%)     | 4 ( 0.3%)     | 6 ( 0.2%)     |
| Scoliosis                                                           | 2 ( 0.1%)     | 4 ( 0.3%)     | 6 ( 0.2%)     |
| Synovial disorders                                                  | 1 (<0.1%)     | 3 ( 0.2%)     | 4 ( 0.1%)     |
| Synovial cyst                                                       | 1 (<0.1%)     | 2 ( 0.1%)     | 3 ( 0.1%)     |
| Tenosynovitis stenosans                                             | 0             | 1 (<0.1%)     | 1 (<0.1%)     |
| Tendon disorders                                                    | 4 ( 0.3%)     | 3 ( 0.2%)     | 7 ( 0.2%)     |
| Tendonitis                                                          | 3 ( 0.2%)     | 2 ( 0.1%)     | 5 ( 0.2%)     |
| Tenosynovitis                                                       | 1 (<0.1%)     | 0             | 1 (<0.1%)     |
| Trigger finger                                                      | 0             | 1 (<0.1%)     | 1 (<0.1%)     |
| Neoplasms benign, malignant and unspecified (incl cysts and polyps) | 41 ( 2.9%)    | 54 ( 3.7%)    | 95 ( 3.3%)    |
| Bone neoplasms benign (excl cysts)                                  | 2 ( 0.1%)     | 0             | 2 (<0.1%)     |
| Benign bone neoplasm                                                | 1 (<0.1%)     | 0             | 1 (<0.1%)     |
| Bone giant cell tumour benign                                       | 1 (<0.1%)     | 0             | 1 (<0.1%)     |
| Bone neoplasms unspecified malignancy                               | 1 (<0.1%)     | 0             | 1 (<0.1%)     |
| Bone neoplasm                                                       | 1 (<0.1%)     | 0             | 1 (<0.1%)     |
| Breast and nipple neoplasms benign                                  | 9 ( 0.6%)     | 6 ( 0.4%)     | 15 ( 0.5%)    |
| Benign breast neoplasm                                              | 0             | 5 ( 0.3%)     | 5 ( 0.2%)     |
| Breast fibroma                                                      | 0             | 1 (<0.1%)     | 1 (<0.1%)     |
| Fibroadenoma of breast                                              | 8 ( 0.6%)     | 0             | 8 ( 0.3%)     |
| Lipoma of breast                                                    | 1 (<0.1%)     | 0             | 1 (<0.1%)     |
| Cervix neoplasms benign                                             | 13 ( 0.9%)    | 16 ( 1.1%)    | 29 ( 1.0%)    |
| Benign neoplasm of cervix uteri                                     | 1 (<0.1%)     | 0             | 1 (<0.1%)     |
| Cervicitis human papilloma virus                                    | 12 ( 0.8%)    | 16 ( 1.1%)    | 28 ( 1.0%)    |
| Leukaemias acute lymphocytic                                        | 0             | 1 (<0.1%)     | 1 (<0.1%)     |
| Acute lymphocytic leukaemia                                         | 0             | 1 (<0.1%)     | 1 (<0.1%)     |
| Lip and oral cavity neoplasms benign                                | 1 (<0.1%)     | 2 ( 0.1%)     | 3 ( 0.1%)     |
| Ameloblastoma                                                       | 0             | 1 (<0.1%)     | 1 (<0.1%)     |
| Benign salivary gland neoplasm                                      | 1 (<0.1%)     | 1 (<0.1%)     | 2 (<0.1%)     |
| Neoplasms benign site unspecified NEC                               | 0             | 2 ( 0.1%)     | 2 (<0.1%)     |
| Adenoma benign                                                      | 0             | 1 (<0.1%)     | 1 (<0.1%)     |
| Benign neoplasm                                                     | 0             | 1 (<0.1%)     | 1 (<0.1%)     |
| Ovarian neoplasms benign                                            | 4 ( 0.3%)     | 3 ( 0.2%)     | 7 ( 0.2%)     |
| Ovarian adenoma                                                     | 1 (<0.1%)     | 0             | 1 (<0.1%)     |
| Ovarian fibroma                                                     | 1 (<0.1%)     | 0             | 1 (<0.1%)     |
| Ovarian germ cell teratoma benign                                   | 2 ( 0.1%)     | 3 ( 0.2%)     | 5 ( 0.2%)     |
| Reproductive neoplasms female benign NEC                            | 0             | 1 (<0.1%)     | 1 (<0.1%)     |
| Benign hydatidiform mole                                            | 0             | 1 (<0.1%)     | 1 (<0.1%)     |

**Table 14.1.1 / 26: Number of subjects with medical history findings by primary system organ class, high level term, preferred term by treatment (FAS)**

| Primary system organ class                                        |                     |                     |                     |
|-------------------------------------------------------------------|---------------------|---------------------|---------------------|
| High level term                                                   |                     |                     |                     |
| Preferred term                                                    | LCS12               | LCS16               | Total               |
| MedDRA Version 14.0                                               | N=1432 (100%)       | N=1452 (100%)       | N=2884 (100%)       |
| Skin neoplasms benign                                             | 4 ( 0.3%)           | 6 ( 0.4%)           | 10 ( 0.3%)          |
| Acrochordon                                                       | 0                   | 1 (<0.1%)           | 1 (<0.1%)           |
| Benign neoplasm of skin                                           | 2 ( 0.1%)           | 2 ( 0.1%)           | 4 ( 0.1%)           |
| Haemangioma of skin                                               | 1 (<0.1%)           | 1 (<0.1%)           | 2 (<0.1%)           |
| Juvenile melanoma benign                                          | 0                   | 1 (<0.1%)           | 1 (<0.1%)           |
| Melanocytic naevus                                                | 1 (<0.1%)           | 0                   | 1 (<0.1%)           |
| Skin papilloma                                                    | 0                   | 1 (<0.1%)           | 1 (<0.1%)           |
| Soft tissue neoplasms benign NEC                                  | 3 ( 0.2%)           | 0                   | 3 ( 0.1%)           |
| Glomus tumour                                                     | 1 (<0.1%)           | 0                   | 1 (<0.1%)           |
| Lipoma                                                            | 2 ( 0.1%)           | 0                   | 2 (<0.1%)           |
| Thyroid neoplasms benign                                          | 1 (<0.1%)           | 0                   | 1 (<0.1%)           |
| Benign neoplasm of thyroid gland                                  | 1 (<0.1%)           | 0                   | 1 (<0.1%)           |
| Upper gastrointestinal neoplasms benign                           | 0                   | 1 (<0.1%)           | 1 (<0.1%)           |
| Benign gastric neoplasm                                           | 0                   | 1 (<0.1%)           | 1 (<0.1%)           |
| Urinary tract neoplasms benign                                    | 1 (<0.1%)           | 0                   | 1 (<0.1%)           |
| Benign neoplasm of urethra                                        | 1 (<0.1%)           | 0                   | 1 (<0.1%)           |
| Uterine neoplasms benign                                          | 0                   | 4 ( 0.3%)           | 4 ( 0.1%)           |
| Uterine leiomyoma                                                 | 0                   | 4 ( 0.3%)           | 4 ( 0.1%)           |
| Vaginal neoplasms benign                                          | 3 ( 0.2%)           | 12 ( 0.8%)          | 15 ( 0.5%)          |
| Vulvovaginal human papilloma virus infection                      | 3 ( 0.2%)           | 12 ( 0.8%)          | 15 ( 0.5%)          |
| <b>Nervous system disorders</b>                                   | <b>247 ( 17.2%)</b> | <b>264 ( 18.2%)</b> | <b>511 ( 17.7%)</b> |
| Acute polyneuropathies                                            | 0                   | 1 (<0.1%)           | 1 (<0.1%)           |
| Guillain-Barre syndrome                                           | 0                   | 1 (<0.1%)           | 1 (<0.1%)           |
| Central nervous system haemorrhages and cerebrovascular accidents | 1 (<0.1%)           | 1 (<0.1%)           | 2 (<0.1%)           |
| Cerebral infarction                                               | 0                   | 1 (<0.1%)           | 1 (<0.1%)           |
| Cerebrovascular accident                                          | 1 (<0.1%)           | 0                   | 1 (<0.1%)           |
| Coma states                                                       | 0                   | 1 (<0.1%)           | 1 (<0.1%)           |
| Coma                                                              | 0                   | 1 (<0.1%)           | 1 (<0.1%)           |
| Cortical dysfunction NEC                                          | 1 (<0.1%)           | 0                   | 1 (<0.1%)           |
| Central auditory processing disorder                              | 1 (<0.1%)           | 0                   | 1 (<0.1%)           |
| Disturbances in consciousness NEC                                 | 2 ( 0.1%)           | 1 (<0.1%)           | 3 ( 0.1%)           |
| Syncope                                                           | 2 ( 0.1%)           | 1 (<0.1%)           | 3 ( 0.1%)           |
| Dystonias                                                         | 2 ( 0.1%)           | 0                   | 2 (<0.1%)           |
| Myotonia                                                          | 2 ( 0.1%)           | 0                   | 2 (<0.1%)           |
| Headaches NEC                                                     | 170 ( 11.9%)        | 181 ( 12.5%)        | 351 ( 12.2%)        |
| Cervicogenic headache                                             | 1 (<0.1%)           | 0                   | 1 (<0.1%)           |
| Cluster headache                                                  | 2 ( 0.1%)           | 0                   | 2 (<0.1%)           |
| Headache                                                          | 138 ( 9.6%)         | 152 ( 10.5%)        | 290 ( 10.1%)        |
| Sinus headache                                                    | 4 ( 0.3%)           | 3 ( 0.2%)           | 7 ( 0.2%)           |
| Tension headache                                                  | 27 ( 1.9%)          | 26 ( 1.8%)          | 53 ( 1.8%)          |
| Vascular headache                                                 | 0                   | 1 (<0.1%)           | 1 (<0.1%)           |

**Table 14.1.1 / 26: Number of subjects with medical history findings by primary system organ class, high level term, preferred term by treatment (FAS)**

| Primary system organ class                        | LCS12         | LCS16         | Total         |
|---------------------------------------------------|---------------|---------------|---------------|
| High level term                                   | N=1432 (100%) | N=1452 (100%) | N=2884 (100%) |
| Preferred term                                    |               |               |               |
| MedDRA Version 14.0                               |               |               |               |
| Increased intracranial pressure disorders         | 1 ( <0.1%)    | 1 ( <0.1%)    | 2 ( <0.1%)    |
| Benign intracranial hypertension                  | 1 ( <0.1%)    | 1 ( <0.1%)    | 2 ( <0.1%)    |
| Lumbar spinal cord and nerve root disorders       | 2 ( 0.1%)     | 0             | 2 ( <0.1%)    |
| Sciatica                                          | 2 ( 0.1%)     | 0             | 2 ( <0.1%)    |
| Memory loss (excl dementia)                       | 0             | 1 ( <0.1%)    | 1 ( <0.1%)    |
| Memory impairment                                 | 0             | 1 ( <0.1%)    | 1 ( <0.1%)    |
| Migraine headaches                                | 83 ( 5.8%)    | 85 ( 5.9%)    | 168 ( 5.8%)   |
| Migraine                                          | 76 ( 5.3%)    | 79 ( 5.4%)    | 155 ( 5.4%)   |
| Migraine with aura                                | 6 ( 0.4%)     | 6 ( 0.4%)     | 12 ( 0.4%)    |
| Migraine without aura                             | 1 ( <0.1%)    | 0             | 1 ( <0.1%)    |
| Mononeuropathies                                  | 2 ( 0.1%)     | 3 ( 0.2%)     | 5 ( 0.2%)     |
| Carpal tunnel syndrome                            | 2 ( 0.1%)     | 2 ( 0.1%)     | 4 ( 0.1%)     |
| Nerve compression                                 | 0             | 1 ( <0.1%)    | 1 ( <0.1%)    |
| Muscle tone abnormal                              | 1 ( <0.1%)    | 0             | 1 ( <0.1%)    |
| Hypertonia                                        | 1 ( <0.1%)    | 0             | 1 ( <0.1%)    |
| Neurologic visual problems NEC                    | 1 ( <0.1%)    | 0             | 1 ( <0.1%)    |
| Hemianopia                                        | 1 ( <0.1%)    | 0             | 1 ( <0.1%)    |
| Neurological signs and symptoms NEC               | 0             | 1 ( <0.1%)    | 1 ( <0.1%)    |
| Dizziness                                         | 0             | 1 ( <0.1%)    | 1 ( <0.1%)    |
| Optic nerve disorders NEC                         | 1 ( <0.1%)    | 0             | 1 ( <0.1%)    |
| Optic neuritis                                    | 1 ( <0.1%)    | 0             | 1 ( <0.1%)    |
| Paraesthesias and dysaesthesias                   | 0             | 1 ( <0.1%)    | 1 ( <0.1%)    |
| Paraesthesia                                      | 0             | 1 ( <0.1%)    | 1 ( <0.1%)    |
| Paralysis and paresis (excl cranial nerve)        | 1 ( <0.1%)    | 0             | 1 ( <0.1%)    |
| Paraparesis                                       | 1 ( <0.1%)    | 0             | 1 ( <0.1%)    |
| Seizures and seizure disorders NEC                | 5 ( 0.3%)     | 9 ( 0.6%)     | 14 ( 0.5%)    |
| Convulsion                                        | 2 ( 0.1%)     | 5 ( 0.3%)     | 7 ( 0.2%)     |
| Epilepsy                                          | 2 ( 0.1%)     | 4 ( 0.3%)     | 6 ( 0.2%)     |
| Febrile convulsion                                | 1 ( <0.1%)    | 0             | 1 ( <0.1%)    |
| Sensory abnormalities NEC                         | 2 ( 0.1%)     | 1 ( <0.1%)    | 3 ( 0.1%)     |
| Complex regional pain syndrome                    | 1 ( <0.1%)    | 0             | 1 ( <0.1%)    |
| Restless legs syndrome                            | 1 ( <0.1%)    | 1 ( <0.1%)    | 2 ( <0.1%)    |
| Pregnancy, puerperium and perinatal conditions    | 78 ( 5.4%)    | 88 ( 6.1%)    | 166 ( 5.8%)   |
| Abortions not specified as induced or spontaneous | 28 ( 2.0%)    | 26 ( 1.8%)    | 54 ( 1.9%)    |
| Abortion                                          | 27 ( 1.9%)    | 25 ( 1.7%)    | 52 ( 1.8%)    |
| Abortion incomplete                               | 1 ( <0.1%)    | 0             | 1 ( <0.1%)    |
| Abortion missed                                   | 0             | 1 ( <0.1%)    | 1 ( <0.1%)    |
| Abortions spontaneous                             | 16 ( 1.1%)    | 21 ( 1.4%)    | 37 ( 1.3%)    |
| Abortion spontaneous                              | 16 ( 1.1%)    | 20 ( 1.4%)    | 36 ( 1.2%)    |
| Abortion spontaneous incomplete                   | 0             | 1 ( <0.1%)    | 1 ( <0.1%)    |



**Table 14.1.1 / 26: Number of subjects with medical history findings by primary system organ class, high level term, preferred term by treatment (FAS)**

| Primary system organ class                           | LCS12         | LCS16         | Total         |
|------------------------------------------------------|---------------|---------------|---------------|
| High level term                                      | N=1432 (100%) | N=1452 (100%) | N=2884 (100%) |
| Preferred term                                       |               |               |               |
| MedDRA Version 14.0                                  |               |               |               |
| Failed labour                                        | 1 ( <0.1%)    | 0             | 1 ( <0.1%)    |
| Arrested labour                                      | 1 ( <0.1%)    | 0             | 1 ( <0.1%)    |
| Foetal complications NEC                             | 3 ( 0.2%)     | 1 ( <0.1%)    | 4 ( 0.1%)     |
| Foetal distress syndrome                             | 3 ( 0.2%)     | 1 ( <0.1%)    | 4 ( 0.1%)     |
| Haemorrhagic complications of pregnancy              | 3 ( 0.2%)     | 4 ( 0.3%)     | 7 ( 0.2%)     |
| Antepartum haemorrhage                               | 2 ( 0.1%)     | 3 ( 0.2%)     | 5 ( 0.2%)     |
| Placenta praevia haemorrhage                         | 1 ( <0.1%)    | 0             | 1 ( <0.1%)    |
| Premature separation of placenta                     | 0             | 1 ( <0.1%)    | 1 ( <0.1%)    |
| Hypertension associated disorders of pregnancy       | 7 ( 0.5%)     | 9 ( 0.6%)     | 16 ( 0.6%)    |
| Gestational hypertension                             | 2 ( 0.1%)     | 4 ( 0.3%)     | 6 ( 0.2%)     |
| HELLP syndrome                                       | 1 ( <0.1%)    | 0             | 1 ( <0.1%)    |
| Pre-eclampsia                                        | 4 ( 0.3%)     | 5 ( 0.3%)     | 9 ( 0.3%)     |
| Labour onset and length abnormalities                | 1 ( <0.1%)    | 0             | 1 ( <0.1%)    |
| Premature labour                                     | 1 ( <0.1%)    | 0             | 1 ( <0.1%)    |
| Maternal complications of delivery NEC               | 0             | 1 ( <0.1%)    | 1 ( <0.1%)    |
| Retained placenta or membranes                       | 0             | 1 ( <0.1%)    | 1 ( <0.1%)    |
| Maternal complications of pregnancy NEC              | 2 ( 0.1%)     | 0             | 2 ( <0.1%)    |
| Cervical incompetence                                | 1 ( <0.1%)    | 0             | 1 ( <0.1%)    |
| Ectopic pregnancy                                    | 1 ( <0.1%)    | 0             | 1 ( <0.1%)    |
| Multiple pregnancies                                 | 1 ( <0.1%)    | 1 ( <0.1%)    | 2 ( <0.1%)    |
| Twin pregnancy                                       | 1 ( <0.1%)    | 1 ( <0.1%)    | 2 ( <0.1%)    |
| Normal pregnancy, labour and delivery                | 21 ( 1.5%)    | 31 ( 2.1%)    | 52 ( 1.8%)    |
| Delivery                                             | 21 ( 1.5%)    | 31 ( 2.1%)    | 52 ( 1.8%)    |
| Placental abnormalities (excl neoplasms)             | 1 ( <0.1%)    | 0             | 1 ( <0.1%)    |
| Placental insufficiency                              | 1 ( <0.1%)    | 0             | 1 ( <0.1%)    |
| Postpartum complications NEC                         | 1 ( <0.1%)    | 3 ( 0.2%)     | 4 ( 0.1%)     |
| Postpartum haemorrhage                               | 1 ( <0.1%)    | 3 ( 0.2%)     | 4 ( 0.1%)     |
| Stillbirth and foetal death                          | 0             | 1 ( <0.1%)    | 1 ( <0.1%)    |
| Stillbirth                                           | 0             | 1 ( <0.1%)    | 1 ( <0.1%)    |
| Unintended pregnancies                               | 1 ( <0.1%)    | 1 ( <0.1%)    | 2 ( <0.1%)    |
| Pregnancy with contraceptive device                  | 1 ( <0.1%)    | 1 ( <0.1%)    | 2 ( <0.1%)    |
| Psychiatric disorders                                | 90 ( 6.3%)    | 101 ( 7.0%)   | 191 ( 6.6%)   |
| Anxiety disorders NEC                                | 2 ( 0.1%)     | 1 ( <0.1%)    | 3 ( 0.1%)     |
| Anxiety disorder                                     | 1 ( <0.1%)    | 1 ( <0.1%)    | 2 ( <0.1%)    |
| Generalised anxiety disorder                         | 1 ( <0.1%)    | 0             | 1 ( <0.1%)    |
| Anxiety symptoms                                     | 24 ( 1.7%)    | 29 ( 2.0%)    | 53 ( 1.8%)    |
| Anxiety                                              | 24 ( 1.7%)    | 28 ( 1.9%)    | 52 ( 1.8%)    |
| Stress                                               | 1 ( <0.1%)    | 1 ( <0.1%)    | 2 ( <0.1%)    |
| Attention deficit and disruptive behaviour disorders | 2 ( 0.1%)     | 4 ( 0.3%)     | 6 ( 0.2%)     |
| Attention deficit/hyperactivity disorder             | 2 ( 0.1%)     | 4 ( 0.3%)     | 6 ( 0.2%)     |

**Table 14.1.1 / 26: Number of subjects with medical history findings by primary system organ class, high level term, preferred term by treatment (FAS)**

| Primary system organ class                                | LCS12         | LCS16         | Total         |
|-----------------------------------------------------------|---------------|---------------|---------------|
| High level term                                           | N=1432 (100%) | N=1452 (100%) | N=2884 (100%) |
| Preferred term                                            |               |               |               |
| MedDRA Version 14.0                                       |               |               |               |
| Bipolar disorders                                         | 0             | 3 ( 0.2%)     | 3 ( 0.1%)     |
| Bipolar disorder                                          | 0             | 3 ( 0.2%)     | 3 ( 0.1%)     |
| Brief psychotic disorder                                  | 0             | 1 (<0.1%)     | 1 (<0.1%)     |
| Brief psychotic disorder, with postpartum onset           | 0             | 1 (<0.1%)     | 1 (<0.1%)     |
| Depressive disorders                                      | 46 ( 3.2%)    | 39 ( 2.7%)    | 85 ( 2.9%)    |
| Depression                                                | 42 ( 2.9%)    | 32 ( 2.2%)    | 74 ( 2.6%)    |
| Major depression                                          | 1 (<0.1%)     | 0             | 1 (<0.1%)     |
| Postpartum depression                                     | 3 ( 0.2%)     | 8 ( 0.6%)     | 11 ( 0.4%)    |
| Disturbances in initiating and maintaining sleep          | 12 ( 0.8%)    | 20 ( 1.4%)    | 32 ( 1.1%)    |
| Insomnia                                                  | 12 ( 0.8%)    | 20 ( 1.4%)    | 32 ( 1.1%)    |
| Eating disorders NEC                                      | 3 ( 0.2%)     | 2 ( 0.1%)     | 5 ( 0.2%)     |
| Bulimia nervosa                                           | 1 (<0.1%)     | 2 ( 0.1%)     | 3 ( 0.1%)     |
| Eating disorder                                           | 2 ( 0.1%)     | 0             | 2 (<0.1%)     |
| Emotional and mood disturbances NEC                       | 1 (<0.1%)     | 0             | 1 (<0.1%)     |
| Mood altered                                              | 1 (<0.1%)     | 0             | 1 (<0.1%)     |
| Fear symptoms and phobic disorders (incl social phobia)   | 1 (<0.1%)     | 1 (<0.1%)     | 2 (<0.1%)     |
| Phobia of flying                                          | 1 (<0.1%)     | 1 (<0.1%)     | 2 (<0.1%)     |
| Fluctuating mood symptoms                                 | 2 ( 0.1%)     | 1 (<0.1%)     | 3 ( 0.1%)     |
| Mood swings                                               | 2 ( 0.1%)     | 1 (<0.1%)     | 3 ( 0.1%)     |
| Mood disorders NEC                                        | 1 (<0.1%)     | 1 (<0.1%)     | 2 (<0.1%)     |
| Seasonal affective disorder                               | 1 (<0.1%)     | 1 (<0.1%)     | 2 (<0.1%)     |
| Orgasmic disorders and disturbances                       | 0             | 1 (<0.1%)     | 1 (<0.1%)     |
| Anorgasmia                                                | 0             | 1 (<0.1%)     | 1 (<0.1%)     |
| Panic attacks and disorders                               | 3 ( 0.2%)     | 6 ( 0.4%)     | 9 ( 0.3%)     |
| Panic attack                                              | 2 ( 0.1%)     | 5 ( 0.3%)     | 7 ( 0.2%)     |
| Panic disorder                                            | 1 (<0.1%)     | 1 (<0.1%)     | 2 (<0.1%)     |
| Personality disorders with dramatic behaviour (Cluster B) | 0             | 1 (<0.1%)     | 1 (<0.1%)     |
| Borderline personality disorder                           | 0             | 1 (<0.1%)     | 1 (<0.1%)     |
| Sexual desire disorders                                   | 3 ( 0.2%)     | 4 ( 0.3%)     | 7 ( 0.2%)     |
| Libido decreased                                          | 3 ( 0.2%)     | 4 ( 0.3%)     | 7 ( 0.2%)     |
| Sleep disorders NEC                                       | 2 ( 0.1%)     | 1 (<0.1%)     | 3 ( 0.1%)     |
| Sleep disorder                                            | 2 ( 0.1%)     | 1 (<0.1%)     | 3 ( 0.1%)     |
| Somatoform disorders                                      | 1 (<0.1%)     | 0             | 1 (<0.1%)     |
| Hypochondriasis                                           | 1 (<0.1%)     | 0             | 1 (<0.1%)     |
| Stress disorders                                          | 1 (<0.1%)     | 0             | 1 (<0.1%)     |
| Burnout syndrome                                          | 1 (<0.1%)     | 0             | 1 (<0.1%)     |
| Substance-related disorders                               | 1 (<0.1%)     | 4 ( 0.3%)     | 5 ( 0.2%)     |
| Alcohol abuse                                             | 0             | 2 ( 0.1%)     | 2 (<0.1%)     |
| Alcoholism                                                | 0             | 1 (<0.1%)     | 1 (<0.1%)     |
| Drug abuse                                                | 0             | 4 ( 0.3%)     | 4 ( 0.1%)     |
| Nicotine dependence                                       | 1 (<0.1%)     | 0             | 1 (<0.1%)     |

**Table 14.1.1 / 26: Number of subjects with medical history findings by primary system organ class, high level term, preferred term by treatment (FAS)**

| Primary system organ class                           | LCS12         | LCS16         | Total         |
|------------------------------------------------------|---------------|---------------|---------------|
| High level term                                      |               |               |               |
| Preferred term                                       |               |               |               |
| MedDRA Version 14.0                                  | N=1432 (100%) | N=1452 (100%) | N=2884 (100%) |
| Renal and urinary disorders                          | 23 ( 1.6%)    | 27 ( 1.9%)    | 50 ( 1.7%)    |
| Bladder and urethral symptoms                        | 8 ( 0.6%)     | 8 ( 0.6%)     | 16 ( 0.6%)    |
| Dysuria                                              | 1 (<0.1%)     | 1 (<0.1%)     | 2 (<0.1%)     |
| Incontinence                                         | 0             | 1 (<0.1%)     | 1 (<0.1%)     |
| Micturition urgency                                  | 1 (<0.1%)     | 1 (<0.1%)     | 2 (<0.1%)     |
| Pollakiuria                                          | 1 (<0.1%)     | 1 (<0.1%)     | 2 (<0.1%)     |
| Stress urinary incontinence                          | 4 ( 0.3%)     | 3 ( 0.2%)     | 7 ( 0.2%)     |
| Urinary incontinence                                 | 1 (<0.1%)     | 0             | 1 (<0.1%)     |
| Urinary retention                                    | 0             | 1 (<0.1%)     | 1 (<0.1%)     |
| Bladder infections and inflammations                 | 1 (<0.1%)     | 1 (<0.1%)     | 2 (<0.1%)     |
| Cystitis interstitial                                | 1 (<0.1%)     | 1 (<0.1%)     | 2 (<0.1%)     |
| Bladder neoplasms                                    | 1 (<0.1%)     | 0             | 1 (<0.1%)     |
| Bladder cyst                                         | 1 (<0.1%)     | 0             | 1 (<0.1%)     |
| Genital and urinary tract disorders NEC              | 1 (<0.1%)     | 0             | 1 (<0.1%)     |
| Urinary tract disorder                               | 1 (<0.1%)     | 0             | 1 (<0.1%)     |
| Genitourinary tract infections and inflammations NEC | 0             | 1 (<0.1%)     | 1 (<0.1%)     |
| Urinary tract inflammation                           | 0             | 1 (<0.1%)     | 1 (<0.1%)     |
| Renal disorders NEC                                  | 0             | 1 (<0.1%)     | 1 (<0.1%)     |
| Renal disorder in pregnancy                          | 0             | 1 (<0.1%)     | 1 (<0.1%)     |
| Renal lithiasis                                      | 9 ( 0.6%)     | 14 ( 1.0%)    | 23 ( 0.8%)    |
| Nephrolithiasis                                      | 9 ( 0.6%)     | 14 ( 1.0%)    | 23 ( 0.8%)    |
| Renal obstructive disorders                          | 1 (<0.1%)     | 0             | 1 (<0.1%)     |
| Hydronephrosis                                       | 1 (<0.1%)     | 0             | 1 (<0.1%)     |
| Urinary abnormalities                                | 1 (<0.1%)     | 0             | 1 (<0.1%)     |
| Haematuria                                           | 1 (<0.1%)     | 0             | 1 (<0.1%)     |
| Urinary tract signs and symptoms NEC                 | 1 (<0.1%)     | 3 ( 0.2%)     | 4 ( 0.1%)     |
| Renal colic                                          | 1 (<0.1%)     | 3 ( 0.2%)     | 4 ( 0.1%)     |
| Reproductive system and breast disorders             | 240 ( 16.8%)  | 243 ( 16.7%)  | 483 ( 16.7%)  |
| Benign and malignant breast neoplasms                | 10 ( 0.7%)    | 9 ( 0.6%)     | 19 ( 0.7%)    |
| Breast cyst                                          | 4 ( 0.3%)     | 2 ( 0.1%)     | 6 ( 0.2%)     |
| Fibrocystic breast disease                           | 6 ( 0.4%)     | 7 ( 0.5%)     | 13 ( 0.5%)    |
| Breast disorders NEC                                 | 6 ( 0.4%)     | 3 ( 0.2%)     | 9 ( 0.3%)     |
| Breast calcifications                                | 0             | 1 (<0.1%)     | 1 (<0.1%)     |
| Breast enlargement                                   | 1 (<0.1%)     | 0             | 1 (<0.1%)     |
| Breast mass                                          | 4 ( 0.3%)     | 2 ( 0.1%)     | 6 ( 0.2%)     |
| Mastoptosis                                          | 1 (<0.1%)     | 0             | 1 (<0.1%)     |
| Breast signs and symptoms                            | 3 ( 0.2%)     | 3 ( 0.2%)     | 6 ( 0.2%)     |
| Breast discomfort                                    | 1 (<0.1%)     | 1 (<0.1%)     | 2 (<0.1%)     |
| Breast pain                                          | 2 ( 0.1%)     | 2 ( 0.1%)     | 4 ( 0.1%)     |

**Table 14.1.1 / 26: Number of subjects with medical history findings by primary system organ class, high level term, preferred term by treatment (FAS)**

| Primary system organ class                     |               |               |               |
|------------------------------------------------|---------------|---------------|---------------|
| High level term                                |               |               |               |
| Preferred term                                 | LCS12         | LCS16         | Total         |
| MedDRA Version 14.0                            | N=1432 (100%) | N=1452 (100%) | N=2884 (100%) |
| Cervix disorders NEC                           | 41 ( 2.9%)    | 45 ( 3.1%)    | 86 ( 3.0%)    |
| Cervical dysplasia                             | 41 ( 2.9%)    | 43 ( 3.0%)    | 84 ( 2.9%)    |
| Uterine cervical squamous metaplasia           | 0             | 1 (<0.1%)     | 1 (<0.1%)     |
| Uterine cervix stenosis                        | 0             | 1 (<0.1%)     | 1 (<0.1%)     |
| Cervix neoplasms                               | 1 (<0.1%)     | 0             | 1 (<0.1%)     |
| Cervical cyst                                  | 1 (<0.1%)     | 0             | 1 (<0.1%)     |
| Lactation disorders                            | 1 (<0.1%)     | 1 (<0.1%)     | 2 (<0.1%)     |
| Galactorrhoea                                  | 1 (<0.1%)     | 1 (<0.1%)     | 2 (<0.1%)     |
| Menstruation and uterine bleeding NEC          | 131 ( 9.1%)   | 135 ( 9.3%)   | 266 ( 9.2%)   |
| Dysfunctional uterine bleeding                 | 0             | 1 (<0.1%)     | 1 (<0.1%)     |
| Dysmenorrhoea                                  | 121 ( 8.4%)   | 128 ( 8.8%)   | 249 ( 8.6%)   |
| Menstruation irregular                         | 5 ( 0.3%)     | 2 ( 0.1%)     | 7 ( 0.2%)     |
| Metrorrhagia                                   | 2 ( 0.1%)     | 4 ( 0.3%)     | 6 ( 0.2%)     |
| Premenstrual syndrome                          | 10 ( 0.7%)    | 3 ( 0.2%)     | 13 ( 0.5%)    |
| Menstruation with decreased bleeding           | 3 ( 0.2%)     | 2 ( 0.1%)     | 5 ( 0.2%)     |
| Amenorrhoea                                    | 3 ( 0.2%)     | 2 ( 0.1%)     | 5 ( 0.2%)     |
| Menstruation with increased bleeding           | 16 ( 1.1%)    | 14 ( 1.0%)    | 30 ( 1.0%)    |
| Menometrorrhagia                               | 2 ( 0.1%)     | 0             | 2 (<0.1%)     |
| Menorrhagia                                    | 14 ( 1.0%)    | 13 ( 0.9%)    | 27 ( 0.9%)    |
| Polymenorrhagia                                | 0             | 1 (<0.1%)     | 1 (<0.1%)     |
| Ovarian and fallopian tube cysts and neoplasms | 30 ( 2.1%)    | 32 ( 2.2%)    | 62 ( 2.1%)    |
| Fallopian tube cyst                            | 2 ( 0.1%)     | 0             | 2 (<0.1%)     |
| Haemorrhagic ovarian cyst                      | 0             | 1 (<0.1%)     | 1 (<0.1%)     |
| Ovarian cyst                                   | 22 ( 1.5%)    | 26 ( 1.8%)    | 48 ( 1.7%)    |
| Ovarian cyst ruptured                          | 2 ( 0.1%)     | 1 (<0.1%)     | 3 ( 0.1%)     |
| Polycystic ovaries                             | 5 ( 0.3%)     | 4 ( 0.3%)     | 9 ( 0.3%)     |
| Ovarian and fallopian tube disorders NEC       | 0             | 1 (<0.1%)     | 1 (<0.1%)     |
| Fallopian tube obstruction                     | 0             | 1 (<0.1%)     | 1 (<0.1%)     |
| Pelvic prolapse conditions                     | 1 (<0.1%)     | 0             | 1 (<0.1%)     |
| Pelvic prolapse                                | 1 (<0.1%)     | 0             | 1 (<0.1%)     |
| Pelvis and broad ligament disorders NEC        | 0             | 1 (<0.1%)     | 1 (<0.1%)     |
| Pelvic adhesions                               | 0             | 1 (<0.1%)     | 1 (<0.1%)     |
| Reproductive tract signs and symptoms NEC      | 3 ( 0.2%)     | 8 ( 0.6%)     | 11 ( 0.4%)    |
| Genital discharge                              | 0             | 1 (<0.1%)     | 1 (<0.1%)     |
| Pelvic discomfort                              | 1 (<0.1%)     | 0             | 1 (<0.1%)     |
| Pelvic pain                                    | 2 ( 0.1%)     | 7 ( 0.5%)     | 9 ( 0.3%)     |
| Scrotal disorders NEC                          | 1 (<0.1%)     | 0             | 1 (<0.1%)     |
| Varicocele                                     | 1 (<0.1%)     | 0             | 1 (<0.1%)     |

**Table 14.1.1 / 26: Number of subjects with medical history findings by primary system organ class, high level term, preferred term by treatment (FAS)**

| Primary system organ class                      | LCS12         | LCS16         | Total         |
|-------------------------------------------------|---------------|---------------|---------------|
| High level term                                 | N=1432 (100%) | N=1452 (100%) | N=2884 (100%) |
| Preferred term                                  |               |               |               |
| MedDRA Version 14.0                             |               |               |               |
| Sexual function and fertility disorders NEC     | 10 ( 0.7%)    | 10 ( 0.7%)    | 20 ( 0.7%)    |
| Dyspareunia                                     | 7 ( 0.5%)     | 9 ( 0.6%)     | 16 ( 0.6%)    |
| Infertility                                     | 2 ( 0.1%)     | 0             | 2 (<0.1%)     |
| Infertility female                              | 1 (<0.1%)     | 0             | 1 (<0.1%)     |
| Infertility male                                | 0             | 1 (<0.1%)     | 1 (<0.1%)     |
| Uterine disorders NEC                           | 12 ( 0.8%)    | 18 ( 1.2%)    | 30 ( 1.0%)    |
| Adenomyosis                                     | 0             | 1 (<0.1%)     | 1 (<0.1%)     |
| Endometriosis                                   | 12 ( 0.8%)    | 16 ( 1.1%)    | 28 ( 1.0%)    |
| Uterine haemorrhage                             | 0             | 1 (<0.1%)     | 1 (<0.1%)     |
| Uterine neoplasms                               | 0             | 1 (<0.1%)     | 1 (<0.1%)     |
| Uterine polyp                                   | 0             | 1 (<0.1%)     | 1 (<0.1%)     |
| Uterine tone disorders                          | 2 ( 0.1%)     | 2 ( 0.1%)     | 4 ( 0.1%)     |
| Uterine atony                                   | 0             | 1 (<0.1%)     | 1 (<0.1%)     |
| Uterine spasm                                   | 2 ( 0.1%)     | 1 (<0.1%)     | 3 ( 0.1%)     |
| Vaginal and vulval infections and inflammations | 2 ( 0.1%)     | 0             | 2 (<0.1%)     |
| Bartholinitis                                   | 2 ( 0.1%)     | 0             | 2 (<0.1%)     |
| Vulvovaginal cysts and neoplasms                | 1 (<0.1%)     | 1 (<0.1%)     | 2 (<0.1%)     |
| Vaginal cyst                                    | 1 (<0.1%)     | 0             | 1 (<0.1%)     |
| Vulva cyst                                      | 0             | 1 (<0.1%)     | 1 (<0.1%)     |
| Vulvovaginal disorders NEC                      | 8 ( 0.6%)     | 5 ( 0.3%)     | 13 ( 0.5%)    |
| Vaginal disorder                                | 3 ( 0.2%)     | 0             | 3 ( 0.1%)     |
| Vaginal haemorrhage                             | 5 ( 0.3%)     | 2 ( 0.1%)     | 7 ( 0.2%)     |
| Vaginal stricture                               | 0             | 1 (<0.1%)     | 1 (<0.1%)     |
| Vulval disorder                                 | 0             | 1 (<0.1%)     | 1 (<0.1%)     |
| Vulval leukoplakia                              | 0             | 1 (<0.1%)     | 1 (<0.1%)     |
| Vulvovaginal signs and symptoms                 | 8 ( 0.6%)     | 6 ( 0.4%)     | 14 ( 0.5%)    |
| Coital bleeding                                 | 2 ( 0.1%)     | 0             | 2 (<0.1%)     |
| Haematocolpos                                   | 1 (<0.1%)     | 0             | 1 (<0.1%)     |
| Labia enlarged                                  | 0             | 1 (<0.1%)     | 1 (<0.1%)     |
| Vaginal discharge                               | 1 (<0.1%)     | 4 ( 0.3%)     | 5 ( 0.2%)     |
| Vaginal lesion                                  | 0             | 1 (<0.1%)     | 1 (<0.1%)     |
| Vulvovaginal erythema                           | 1 (<0.1%)     | 0             | 1 (<0.1%)     |
| Vulvovaginal pain                               | 3 ( 0.2%)     | 0             | 3 ( 0.1%)     |
| Respiratory, thoracic and mediastinal disorders | 87 ( 6.1%)    | 97 ( 6.7%)    | 184 ( 6.4%)   |
| Breathing abnormalities                         | 1 (<0.1%)     | 1 (<0.1%)     | 2 (<0.1%)     |
| Dyspnoea                                        | 1 (<0.1%)     | 0             | 1 (<0.1%)     |
| Hyperventilation                                | 0             | 1 (<0.1%)     | 1 (<0.1%)     |

**Table 14.1.1 / 26: Number of subjects with medical history findings by primary system organ class, high level term, preferred term by treatment (FAS)**

| Primary system organ class                                                 | LCS12         | LCS16         | Total         |
|----------------------------------------------------------------------------|---------------|---------------|---------------|
| High level term                                                            | N=1432 (100%) | N=1452 (100%) | N=2884 (100%) |
| Preferred term                                                             |               |               |               |
| MedDRA Version 14.0                                                        |               |               |               |
| Bronchospasm and obstruction                                               | 50 ( 3.5%)    | 58 ( 4.0%)    | 108 ( 3.7%)   |
| Asthma                                                                     | 39 ( 2.7%)    | 51 ( 3.5%)    | 90 ( 3.1%)    |
| Asthma exercise induced                                                    | 5 ( 0.3%)     | 6 ( 0.4%)     | 11 ( 0.4%)    |
| Asthmatic crisis                                                           | 1 (<0.1%)     | 0             | 1 (<0.1%)     |
| Bronchitis chronic                                                         | 4 ( 0.3%)     | 0             | 4 ( 0.1%)     |
| Bronchospasm                                                               | 1 (<0.1%)     | 0             | 1 (<0.1%)     |
| Infantile asthma                                                           | 1 (<0.1%)     | 1 (<0.1%)     | 2 (<0.1%)     |
| Coughing and associated symptoms                                           | 3 ( 0.2%)     | 1 (<0.1%)     | 4 ( 0.1%)     |
| Cough                                                                      | 3 ( 0.2%)     | 1 (<0.1%)     | 4 ( 0.1%)     |
| Productive cough                                                           | 1 (<0.1%)     | 0             | 1 (<0.1%)     |
| Laryngeal and adjacent sites disorders NEC (excl infections and neoplasms) | 1 (<0.1%)     | 0             | 1 (<0.1%)     |
| Vocal cord thickening                                                      | 1 (<0.1%)     | 0             | 1 (<0.1%)     |
| Nasal congestion and inflammations                                         | 21 ( 1.5%)    | 21 ( 1.4%)    | 42 ( 1.5%)    |
| Nasal congestion                                                           | 0             | 1 (<0.1%)     | 1 (<0.1%)     |
| Rhinitis allergic                                                          | 10 ( 0.7%)    | 11 ( 0.8%)    | 21 ( 0.7%)    |
| Rhinitis perennial                                                         | 0             | 1 (<0.1%)     | 1 (<0.1%)     |
| Rhinitis seasonal                                                          | 11 ( 0.8%)    | 9 ( 0.6%)     | 20 ( 0.7%)    |
| Nasal disorders NEC                                                        | 5 ( 0.3%)     | 6 ( 0.4%)     | 11 ( 0.4%)    |
| Epistaxis                                                                  | 0             | 2 ( 0.1%)     | 2 (<0.1%)     |
| Nasal septum deviation                                                     | 5 ( 0.3%)     | 4 ( 0.3%)     | 9 ( 0.3%)     |
| Paranasal sinus disorders (excl infections and neoplasms)                  | 2 ( 0.1%)     | 6 ( 0.4%)     | 8 ( 0.3%)     |
| Allergic sinusitis                                                         | 1 (<0.1%)     | 0             | 1 (<0.1%)     |
| Sinus congestion                                                           | 1 (<0.1%)     | 5 ( 0.3%)     | 6 ( 0.2%)     |
| Sinus disorder                                                             | 0             | 1 (<0.1%)     | 1 (<0.1%)     |
| Pharyngeal disorders (excl infections and neoplasms)                       | 2 ( 0.1%)     | 0             | 2 (<0.1%)     |
| Adenoidal disorder                                                         | 1 (<0.1%)     | 0             | 1 (<0.1%)     |
| Tonsillar hypertrophy                                                      | 1 (<0.1%)     | 0             | 1 (<0.1%)     |
| Pneumothorax and pleural effusions NEC                                     | 1 (<0.1%)     | 0             | 1 (<0.1%)     |
| Pneumothorax                                                               | 1 (<0.1%)     | 0             | 1 (<0.1%)     |
| Respiratory tract disorders NEC                                            | 1 (<0.1%)     | 0             | 1 (<0.1%)     |
| Chronic respiratory disease                                                | 1 (<0.1%)     | 0             | 1 (<0.1%)     |
| Upper respiratory tract signs and symptoms                                 | 4 ( 0.3%)     | 7 ( 0.5%)     | 11 ( 0.4%)    |
| Dysphonia                                                                  | 0             | 1 (<0.1%)     | 1 (<0.1%)     |
| Oropharyngeal pain                                                         | 3 ( 0.2%)     | 5 ( 0.3%)     | 8 ( 0.3%)     |
| Rhinorrhoea                                                                | 1 (<0.1%)     | 0             | 1 (<0.1%)     |
| Throat irritation                                                          | 0             | 1 (<0.1%)     | 1 (<0.1%)     |
| Skin and subcutaneous tissue disorders                                     | 92 ( 6.4%)    | 80 ( 5.5%)    | 172 ( 6.0%)   |
| Acnes                                                                      | 42 ( 2.9%)    | 46 ( 3.2%)    | 88 ( 3.1%)    |
| Acne                                                                       | 41 ( 2.9%)    | 45 ( 3.1%)    | 86 ( 3.0%)    |
| Acne cystic                                                                | 1 (<0.1%)     | 1 (<0.1%)     | 2 (<0.1%)     |

**Table 14.1.1 / 26: Number of subjects with medical history findings by primary system organ class, high level term, preferred term by treatment (FAS)**

| Primary system organ class                                      | LCS12         | LCS16         | Total         |
|-----------------------------------------------------------------|---------------|---------------|---------------|
| High level term                                                 | N=1432 (100%) | N=1452 (100%) | N=2884 (100%) |
| Preferred term                                                  |               |               |               |
| MedDRA Version 14.0                                             |               |               |               |
| Alopecias                                                       | 1 ( <0.1%)    | 0             | 1 ( <0.1%)    |
| Alopecia                                                        | 1 ( <0.1%)    | 0             | 1 ( <0.1%)    |
| Apocrine and eccrine gland disorders                            | 3 ( 0.2%)     | 1 ( <0.1%)    | 4 ( 0.1%)     |
| Heat rash                                                       | 0             | 1 ( <0.1%)    | 1 ( <0.1%)    |
| Hyperhidrosis                                                   | 2 ( 0.1%)     | 0             | 2 ( <0.1%)    |
| Night sweats                                                    | 1 ( <0.1%)    | 1 ( <0.1%)    | 2 ( <0.1%)    |
| Dermal and epidermal conditions NEC                             | 2 ( 0.1%)     | 1 ( <0.1%)    | 3 ( 0.1%)     |
| Dry skin                                                        | 2 ( 0.1%)     | 0             | 2 ( <0.1%)    |
| Skin fissures                                                   | 0             | 1 ( <0.1%)    | 1 ( <0.1%)    |
| Dermatitis and eczema                                           | 28 ( 2.0%)    | 20 ( 1.4%)    | 48 ( 1.7%)    |
| Dermatitis                                                      | 1 ( <0.1%)    | 0             | 1 ( <0.1%)    |
| Dermatitis allergic                                             | 1 ( <0.1%)    | 0             | 1 ( <0.1%)    |
| Dermatitis atopic                                               | 9 ( 0.6%)     | 6 ( 0.4%)     | 15 ( 0.5%)    |
| Dermatitis contact                                              | 2 ( 0.1%)     | 5 ( 0.3%)     | 7 ( 0.2%)     |
| Eczema                                                          | 16 ( 1.1%)    | 9 ( 0.6%)     | 25 ( 0.9%)    |
| Granulomatous and deep cutaneous inflammatory conditions        | 1 ( <0.1%)    | 0             | 1 ( <0.1%)    |
| Granuloma annulare                                              | 1 ( <0.1%)    | 0             | 1 ( <0.1%)    |
| Hyperkeratoses                                                  | 1 ( <0.1%)    | 1 ( <0.1%)    | 2 ( <0.1%)    |
| Hyperkeratosis                                                  | 1 ( <0.1%)    | 0             | 1 ( <0.1%)    |
| Keratosis pilaris                                               | 0             | 1 ( <0.1%)    | 1 ( <0.1%)    |
| Hyperpigmentation disorders                                     | 0             | 1 ( <0.1%)    | 1 ( <0.1%)    |
| Chloasma                                                        | 0             | 1 ( <0.1%)    | 1 ( <0.1%)    |
| Hypertrichoses                                                  | 1 ( <0.1%)    | 2 ( 0.1%)     | 3 ( 0.1%)     |
| Hirsutism                                                       | 1 ( <0.1%)    | 1 ( <0.1%)    | 2 ( <0.1%)    |
| Hypertrichosis                                                  | 0             | 1 ( <0.1%)    | 1 ( <0.1%)    |
| Hypopigmentation disorders                                      | 1 ( <0.1%)    | 0             | 1 ( <0.1%)    |
| Vitiligo                                                        | 1 ( <0.1%)    | 0             | 1 ( <0.1%)    |
| Nail and nail bed conditions (excl infections and infestations) | 2 ( 0.1%)     | 0             | 2 ( <0.1%)    |
| Ingrowing nail                                                  | 2 ( 0.1%)     | 0             | 2 ( <0.1%)    |
| Panniculitides                                                  | 1 ( <0.1%)    | 0             | 1 ( <0.1%)    |
| Erythema nodosum                                                | 1 ( <0.1%)    | 0             | 1 ( <0.1%)    |
| Photosensitivity conditions                                     | 2 ( 0.1%)     | 0             | 2 ( <0.1%)    |
| Photosensitivity allergic reaction                              | 1 ( <0.1%)    | 0             | 1 ( <0.1%)    |
| Photosensitivity reaction                                       | 1 ( <0.1%)    | 0             | 1 ( <0.1%)    |
| Pruritus NEC                                                    | 0             | 2 ( 0.1%)     | 2 ( <0.1%)    |
| Pruritus                                                        | 0             | 1 ( <0.1%)    | 1 ( <0.1%)    |
| Pruritus generalised                                            | 0             | 1 ( <0.1%)    | 1 ( <0.1%)    |
| Psoriatic conditions                                            | 6 ( 0.4%)     | 4 ( 0.3%)     | 10 ( 0.3%)    |
| Psoriasis                                                       | 6 ( 0.4%)     | 4 ( 0.3%)     | 10 ( 0.3%)    |
| Purpura and related conditions                                  | 0             | 1 ( <0.1%)    | 1 ( <0.1%)    |
| Increased tendency to bruise                                    | 0             | 1 ( <0.1%)    | 1 ( <0.1%)    |

**Table 14.1.1 / 26: Number of subjects with medical history findings by primary system organ class, high level term, preferred term by treatment (FAS)**

| Primary system organ class              | LCS12         | LCS16         | Total         |
|-----------------------------------------|---------------|---------------|---------------|
| High level term                         | N=1432 (100%) | N=1452 (100%) | N=2884 (100%) |
| Preferred term                          |               |               |               |
| MedDRA Version 14.0                     |               |               |               |
| Rosaceas                                | 2 ( 0.1%)     | 0             | 2 ( <0.1%)    |
| Rosacea                                 | 2 ( 0.1%)     | 0             | 2 ( <0.1%)    |
| Scaly conditions                        | 1 ( <0.1%)    | 0             | 1 ( <0.1%)    |
| Pityriasis                              | 1 ( <0.1%)    | 0             | 1 ( <0.1%)    |
| Sebaceous gland disorders               | 0             | 1 ( <0.1%)    | 1 ( <0.1%)    |
| Seborrhoea                              | 0             | 1 ( <0.1%)    | 1 ( <0.1%)    |
| Skin and subcutaneous conditions NEC    | 0             | 1 ( <0.1%)    | 1 ( <0.1%)    |
| Skin mass                               | 0             | 1 ( <0.1%)    | 1 ( <0.1%)    |
| Skin cysts and polyps                   | 1 ( <0.1%)    | 0             | 1 ( <0.1%)    |
| Dermal cyst                             | 1 ( <0.1%)    | 0             | 1 ( <0.1%)    |
| Skin hypoplasias and atrophies          | 0             | 1 ( <0.1%)    | 1 ( <0.1%)    |
| Skin striae                             | 0             | 1 ( <0.1%)    | 1 ( <0.1%)    |
| Skin injuries and mechanical dermatoses | 4 ( 0.3%)     | 0             | 4 ( 0.1%)     |
| Scar                                    | 4 ( 0.3%)     | 0             | 4 ( 0.1%)     |
| Telangiectasia and related conditions   | 1 ( <0.1%)    | 0             | 1 ( <0.1%)    |
| Telangiectasia                          | 1 ( <0.1%)    | 0             | 1 ( <0.1%)    |
| Urticarias                              | 2 ( 0.1%)     | 3 ( 0.2%)     | 5 ( 0.2%)     |
| Urticaria                               | 2 ( 0.1%)     | 3 ( 0.2%)     | 5 ( 0.2%)     |
| Social circumstances                    | 16 ( 1.1%)    | 17 ( 1.2%)    | 33 ( 1.1%)    |
| Disability issues                       | 6 ( 0.4%)     | 7 ( 0.5%)     | 13 ( 0.5%)    |
| Corrective lens user                    | 6 ( 0.4%)     | 5 ( 0.3%)     | 11 ( 0.4%)    |
| Hearing aid user                        | 0             | 1 ( <0.1%)    | 1 ( <0.1%)    |
| Orthosis user                           | 0             | 1 ( <0.1%)    | 1 ( <0.1%)    |
| Family and partner issues               | 0             | 1 ( <0.1%)    | 1 ( <0.1%)    |
| Familial risk factor                    | 0             | 1 ( <0.1%)    | 1 ( <0.1%)    |
| Pregnancy related circumstances         | 7 ( 0.5%)     | 7 ( 0.5%)     | 14 ( 0.5%)    |
| Aborted pregnancy                       | 7 ( 0.5%)     | 6 ( 0.4%)     | 13 ( 0.5%)    |
| Nulliparous                             | 0             | 1 ( <0.1%)    | 1 ( <0.1%)    |
| Social issues NEC                       | 2 ( 0.1%)     | 3 ( 0.2%)     | 5 ( 0.2%)     |
| Cosmetic body piercing                  | 1 ( <0.1%)    | 0             | 1 ( <0.1%)    |
| Organ donor                             | 0             | 1 ( <0.1%)    | 1 ( <0.1%)    |
| Tattoo                                  | 2 ( 0.1%)     | 2 ( 0.1%)     | 4 ( 0.1%)     |
| Tobacco use                             | 1 ( <0.1%)    | 0             | 1 ( <0.1%)    |
| Tobacco user                            | 1 ( <0.1%)    | 0             | 1 ( <0.1%)    |
| Surgical and medical procedures         | 616 ( 43.0%)  | 579 ( 39.9%)  | 1195 ( 41.4%) |
| Abdominal therapeutic procedures NEC    | 9 ( 0.6%)     | 1 ( <0.1%)    | 10 ( 0.3%)    |
| Abdominoplasty                          | 9 ( 0.6%)     | 1 ( <0.1%)    | 10 ( 0.3%)    |



**Table 14.1.1 / 26: Number of subjects with medical history findings by primary system organ class, high level term, preferred term by treatment (FAS)**

| Primary system organ class                           | LCS12         | LCS16         | Total         |
|------------------------------------------------------|---------------|---------------|---------------|
| High level term                                      |               |               |               |
| Preferred term                                       |               |               |               |
| MedDRA Version 14.0                                  | N=1432 (100%) | N=1452 (100%) | N=2884 (100%) |
| Anorectal therapeutic procedures                     | 4 ( 0.3%)     | 1 ( <0.1%)    | 5 ( 0.2%)     |
| Anal fissure excision                                | 1 ( <0.1%)    | 0             | 1 ( <0.1%)    |
| Anal fistula excision                                | 1 ( <0.1%)    | 0             | 1 ( <0.1%)    |
| Haemorrhoid operation                                | 2 ( 0.1%)     | 1 ( <0.1%)    | 3 ( 0.1%)     |
| Biliary tract and gallbladder therapeutic procedures | 35 ( 2.4%)    | 39 ( 2.7%)    | 74 ( 2.6%)    |
| Cholecystectomy                                      | 33 ( 2.3%)    | 37 ( 2.5%)    | 70 ( 2.4%)    |
| Cholelithotomy                                       | 1 ( <0.1%)    | 0             | 1 ( <0.1%)    |
| Gallbladder operation                                | 1 ( <0.1%)    | 2 ( 0.1%)     | 3 ( 0.1%)     |
| Bladder therapeutic procedures                       | 2 ( 0.1%)     | 0             | 2 ( <0.1%)    |
| Bladder irrigation                                   | 1 ( <0.1%)    | 0             | 1 ( <0.1%)    |
| Bladder repair                                       | 1 ( <0.1%)    | 0             | 1 ( <0.1%)    |
| Blood and blood product treatment                    | 0             | 1 ( <0.1%)    | 1 ( <0.1%)    |
| Transfusion                                          | 0             | 1 ( <0.1%)    | 1 ( <0.1%)    |
| Bone therapeutic procedures NEC                      | 7 ( 0.5%)     | 6 ( 0.4%)     | 13 ( 0.5%)    |
| Bone cyst excision                                   | 1 ( <0.1%)    | 0             | 1 ( <0.1%)    |
| Bone graft                                           | 1 ( <0.1%)    | 0             | 1 ( <0.1%)    |
| Bone lesion excision                                 | 0             | 2 ( 0.1%)     | 2 ( <0.1%)    |
| Bone operation                                       | 1 ( <0.1%)    | 2 ( 0.1%)     | 3 ( 0.1%)     |
| Epiphyseal stapling                                  | 1 ( <0.1%)    | 0             | 1 ( <0.1%)    |
| Ostectomy                                            | 1 ( <0.1%)    | 0             | 1 ( <0.1%)    |
| Osteosynthesis                                       | 2 ( 0.1%)     | 2 ( 0.1%)     | 4 ( 0.1%)     |
| Osteotomy                                            | 2 ( 0.1%)     | 0             | 2 ( <0.1%)    |
| Removal of internal fixation                         | 1 ( <0.1%)    | 0             | 1 ( <0.1%)    |
| Breast neoplasm removal                              | 7 ( 0.5%)     | 3 ( 0.2%)     | 10 ( 0.3%)    |
| Breast cyst excision                                 | 4 ( 0.3%)     | 2 ( 0.1%)     | 6 ( 0.2%)     |
| Breast lump removal                                  | 3 ( 0.2%)     | 1 ( <0.1%)    | 4 ( 0.1%)     |
| Breast therapeutic procedures NEC                    | 48 ( 3.4%)    | 65 ( 4.5%)    | 113 ( 3.9%)   |
| Breast cyst drainage                                 | 0             | 1 ( <0.1%)    | 1 ( <0.1%)    |
| Breast prosthesis implantation                       | 16 ( 1.1%)    | 21 ( 1.4%)    | 37 ( 1.3%)    |
| Breast prosthesis removal                            | 1 ( <0.1%)    | 0             | 1 ( <0.1%)    |
| Breast reconstruction                                | 1 ( <0.1%)    | 0             | 1 ( <0.1%)    |
| Mammoplasty                                          | 31 ( 2.2%)    | 44 ( 3.0%)    | 75 ( 2.6%)    |
| Cardiac device therapeutic procedures                | 0             | 1 ( <0.1%)    | 1 ( <0.1%)    |
| Cardiac pacemaker insertion                          | 0             | 1 ( <0.1%)    | 1 ( <0.1%)    |
| Cardiac therapeutic procedures NEC                   | 0             | 1 ( <0.1%)    | 1 ( <0.1%)    |
| Cardiac ablation                                     | 0             | 1 ( <0.1%)    | 1 ( <0.1%)    |

**Table 14.1.1 / 26: Number of subjects with medical history findings by primary system organ class, high level term, preferred term by treatment (FAS)**

| Primary system organ class                        | LCS12         | LCS16         | Total         |
|---------------------------------------------------|---------------|---------------|---------------|
| High level term                                   |               |               |               |
| Preferred term                                    |               |               |               |
| MedDRA Version 14.0                               | N=1432 (100%) | N=1452 (100%) | N=2884 (100%) |
| Cervix therapeutic procedures                     | 31 ( 2.2%)    | 35 ( 2.4%)    | 66 ( 2.3%)    |
| Cervical conisation                               | 3 ( 0.2%)     | 3 ( 0.2%)     | 6 ( 0.2%)     |
| Cervical laser therapy                            | 2 ( 0.1%)     | 2 ( 0.1%)     | 4 ( 0.1%)     |
| Cervix cautery                                    | 4 ( 0.3%)     | 6 ( 0.4%)     | 10 ( 0.3%)    |
| Cervix cerclage procedure                         | 2 ( 0.1%)     | 1 (<0.1%)     | 3 ( 0.1%)     |
| Cervix operation                                  | 0             | 2 ( 0.1%)     | 2 (<0.1%)     |
| Endocervical curettage                            | 1 (<0.1%)     | 4 ( 0.3%)     | 5 ( 0.2%)     |
| Loop electrosurgical excision procedure           | 19 ( 1.3%)    | 17 ( 1.2%)    | 36 ( 1.2%)    |
| Chest wall and mediastinal therapeutic procedures | 1 (<0.1%)     | 0             | 1 (<0.1%)     |
| Rib excision                                      | 1 (<0.1%)     | 0             | 1 (<0.1%)     |
| Contraceptive methods female                      | 1 (<0.1%)     | 0             | 1 (<0.1%)     |
| Intra-uterine contraceptive device                | 1 (<0.1%)     | 0             | 1 (<0.1%)     |
| Corneal and scleral therapeutic procedures        | 3 ( 0.2%)     | 3 ( 0.2%)     | 6 ( 0.2%)     |
| Keratomileusis                                    | 3 ( 0.2%)     | 3 ( 0.2%)     | 6 ( 0.2%)     |
| Dental and gingival therapeutic procedures        | 64 ( 4.5%)    | 63 ( 4.3%)    | 127 ( 4.4%)   |
| Dental care                                       | 0             | 1 (<0.1%)     | 1 (<0.1%)     |
| Dental operation                                  | 2 ( 0.1%)     | 2 ( 0.1%)     | 4 ( 0.1%)     |
| Endodontic procedure                              | 0             | 2 ( 0.1%)     | 2 (<0.1%)     |
| Gingival graft                                    | 1 (<0.1%)     | 0             | 1 (<0.1%)     |
| Gingival operation                                | 0             | 1 (<0.1%)     | 1 (<0.1%)     |
| Gingivectomy                                      | 1 (<0.1%)     | 0             | 1 (<0.1%)     |
| Periodontal operation                             | 0             | 1 (<0.1%)     | 1 (<0.1%)     |
| Tooth extraction                                  | 7 ( 0.5%)     | 5 ( 0.3%)     | 12 ( 0.4%)    |
| Wisdom teeth removal                              | 55 ( 3.8%)    | 52 ( 3.6%)    | 107 ( 3.7%)   |
| External ear therapeutic procedures               | 1 (<0.1%)     | 0             | 1 (<0.1%)     |
| Otoplasty                                         | 1 (<0.1%)     | 0             | 1 (<0.1%)     |
| External female genital therapeutic procedures    | 5 ( 0.3%)     | 4 ( 0.3%)     | 9 ( 0.3%)     |
| Bartholin's cyst removal                          | 1 (<0.1%)     | 1 (<0.1%)     | 2 (<0.1%)     |
| Genital labial operation                          | 1 (<0.1%)     | 0             | 1 (<0.1%)     |
| Vulval warts removal                              | 3 ( 0.2%)     | 2 ( 0.1%)     | 5 ( 0.2%)     |
| Vulvectomy                                        | 0             | 1 (<0.1%)     | 1 (<0.1%)     |
| Eye therapeutic procedures NEC                    | 6 ( 0.4%)     | 5 ( 0.3%)     | 11 ( 0.4%)    |
| Eye laser surgery                                 | 1 (<0.1%)     | 1 (<0.1%)     | 2 (<0.1%)     |
| Eye operation                                     | 5 ( 0.3%)     | 3 ( 0.2%)     | 8 ( 0.3%)     |
| Eyeglasses therapy                                | 0             | 1 (<0.1%)     | 1 (<0.1%)     |
| Facial therapeutic procedures                     | 8 ( 0.6%)     | 5 ( 0.3%)     | 13 ( 0.5%)    |
| Jaw operation                                     | 6 ( 0.4%)     | 5 ( 0.3%)     | 11 ( 0.4%)    |
| Maxillofacial operation                           | 1 (<0.1%)     | 0             | 1 (<0.1%)     |
| Plastic surgery to the face                       | 1 (<0.1%)     | 0             | 1 (<0.1%)     |
| Fallopian tube therapeutic procedures             | 0             | 2 ( 0.1%)     | 2 (<0.1%)     |
| Salpingectomy                                     | 0             | 1 (<0.1%)     | 1 (<0.1%)     |
| Salpingo-oophorectomy unilateral                  | 0             | 1 (<0.1%)     | 1 (<0.1%)     |

**Table 14.1.1 / 26: Number of subjects with medical history findings by primary system organ class, high level term, preferred term by treatment (FAS)**

| Primary system organ class                            |  |               |               |               |
|-------------------------------------------------------|--|---------------|---------------|---------------|
| High level term                                       |  |               |               |               |
| Preferred term                                        |  | LCS12         | LCS16         | Total         |
| MedDRA Version 14.0                                   |  | N=1432 (100%) | N=1452 (100%) | N=2884 (100%) |
| Fertility and fertilisation interventions female      |  | 2 ( 0.1%)     | 3 ( 0.2%)     | 5 ( 0.2%)     |
| In vitro fertilisation                                |  | 2 ( 0.1%)     | 3 ( 0.2%)     | 5 ( 0.2%)     |
| Gastric therapeutic procedures                        |  | 0             | 6 ( 0.4%)     | 6 ( 0.2%)     |
| Gastric banding                                       |  | 0             | 1 (<0.1%)     | 1 (<0.1%)     |
| Gastric bypass                                        |  | 0             | 5 ( 0.3%)     | 5 ( 0.2%)     |
| Head, neck and oral cavity therapeutic procedures NEC |  | 4 ( 0.3%)     | 1 (<0.1%)     | 5 ( 0.2%)     |
| Ear operation                                         |  | 1 (<0.1%)     | 1 (<0.1%)     | 2 (<0.1%)     |
| Oral surgery                                          |  | 3 ( 0.2%)     | 0             | 3 ( 0.1%)     |
| Hernia repairs                                        |  | 15 ( 1.0%)    | 15 ( 1.0%)    | 30 ( 1.0%)    |
| Abdominal hernia repair                               |  | 2 ( 0.1%)     | 0             | 2 (<0.1%)     |
| Hernia repair                                         |  | 0             | 2 ( 0.1%)     | 2 (<0.1%)     |
| Inguinal hernia repair                                |  | 8 ( 0.6%)     | 11 ( 0.8%)    | 19 ( 0.7%)    |
| Umbilical hernia repair                               |  | 5 ( 0.3%)     | 2 ( 0.1%)     | 7 ( 0.2%)     |
| Immunisations                                         |  | 1 (<0.1%)     | 0             | 1 (<0.1%)     |
| Immunisation                                          |  | 1 (<0.1%)     | 0             | 1 (<0.1%)     |
| Induced abortions                                     |  | 18 ( 1.3%)    | 19 ( 1.3%)    | 37 ( 1.3%)    |
| Abortion induced                                      |  | 18 ( 1.3%)    | 19 ( 1.3%)    | 37 ( 1.3%)    |
| Joint therapeutic procedures                          |  | 35 ( 2.4%)    | 32 ( 2.2%)    | 67 ( 2.3%)    |
| Ankle operation                                       |  | 5 ( 0.3%)     | 2 ( 0.1%)     | 7 ( 0.2%)     |
| Bunion operation                                      |  | 6 ( 0.4%)     | 2 ( 0.1%)     | 8 ( 0.3%)     |
| Elbow operation                                       |  | 1 (<0.1%)     | 1 (<0.1%)     | 2 (<0.1%)     |
| Joint dislocation reduction                           |  | 1 (<0.1%)     | 0             | 1 (<0.1%)     |
| Joint injection                                       |  | 0             | 1 (<0.1%)     | 1 (<0.1%)     |
| Knee operation                                        |  | 7 ( 0.5%)     | 12 ( 0.8%)    | 19 ( 0.7%)    |
| Ligament operation                                    |  | 6 ( 0.4%)     | 9 ( 0.6%)     | 15 ( 0.5%)    |
| Meniscus operation                                    |  | 2 ( 0.1%)     | 0             | 2 (<0.1%)     |
| Meniscus removal                                      |  | 2 ( 0.1%)     | 2 ( 0.1%)     | 4 ( 0.1%)     |
| Shoulder operation                                    |  | 3 ( 0.2%)     | 3 ( 0.2%)     | 6 ( 0.2%)     |
| Synovectomy                                           |  | 1 (<0.1%)     | 0             | 1 (<0.1%)     |
| Wrist surgery                                         |  | 1 (<0.1%)     | 1 (<0.1%)     | 2 (<0.1%)     |
| Large intestine therapeutic procedures                |  | 85 ( 5.9%)    | 61 ( 4.2%)    | 146 ( 5.1%)   |
| Appendicectomy                                        |  | 84 ( 5.9%)    | 61 ( 4.2%)    | 145 ( 5.0%)   |
| Proctocolectomy                                       |  | 1 (<0.1%)     | 0             | 1 (<0.1%)     |
| Lens therapeutic procedures                           |  | 0             | 1 (<0.1%)     | 1 (<0.1%)     |
| Cataract operation                                    |  | 0             | 1 (<0.1%)     | 1 (<0.1%)     |
| Limb therapeutic procedures                           |  | 7 ( 0.5%)     | 9 ( 0.6%)     | 16 ( 0.6%)    |
| Foot operation                                        |  | 1 (<0.1%)     | 3 ( 0.2%)     | 4 ( 0.1%)     |
| Limb operation                                        |  | 4 ( 0.3%)     | 4 ( 0.3%)     | 8 ( 0.3%)     |
| Toe amputation                                        |  | 0             | 1 (<0.1%)     | 1 (<0.1%)     |
| Toe operation                                         |  | 2 ( 0.1%)     | 1 (<0.1%)     | 3 ( 0.1%)     |

**Table 14.1.1 / 26: Number of subjects with medical history findings by primary system organ class, high level term, preferred term by treatment (FAS)**

| Primary system organ class                    |               |               |               |  |
|-----------------------------------------------|---------------|---------------|---------------|--|
| High level term                               |               |               |               |  |
| Preferred term                                | LCS12         | LCS16         | Total         |  |
| MedDRA Version 14.0                           | N=1432 (100%) | N=1452 (100%) | N=2884 (100%) |  |
| Lymphoid tissue therapeutic procedures        | 2 ( 0.1%)     | 3 ( 0.2%)     | 5 ( 0.2%)     |  |
| Lymphadenectomy                               | 1 (<0.1%)     | 1 (<0.1%)     | 2 (<0.1%)     |  |
| Lymphoid tissue operation                     | 0             | 1 (<0.1%)     | 1 (<0.1%)     |  |
| Splenectomy                                   | 1 (<0.1%)     | 0             | 1 (<0.1%)     |  |
| Thymectomy                                    | 0             | 1 (<0.1%)     | 1 (<0.1%)     |  |
| Mastoid therapeutic procedures                | 1 (<0.1%)     | 0             | 1 (<0.1%)     |  |
| Mastoidectomy                                 | 1 (<0.1%)     | 0             | 1 (<0.1%)     |  |
| Middle ear therapeutic procedures             | 12 ( 0.8%)    | 9 ( 0.6%)     | 21 ( 0.7%)    |  |
| Ear tube insertion                            | 6 ( 0.4%)     | 5 ( 0.3%)     | 11 ( 0.4%)    |  |
| Ear tube removal                              | 1 (<0.1%)     | 0             | 1 (<0.1%)     |  |
| Myringotomy                                   | 3 ( 0.2%)     | 2 ( 0.1%)     | 5 ( 0.2%)     |  |
| Tympanoplasty                                 | 2 ( 0.1%)     | 3 ( 0.2%)     | 5 ( 0.2%)     |  |
| Nasal therapeutic procedures                  | 16 ( 1.1%)    | 9 ( 0.6%)     | 25 ( 0.9%)    |  |
| Cautery to nose                               | 1 (<0.1%)     | 1 (<0.1%)     | 2 (<0.1%)     |  |
| Nasal operation                               | 4 ( 0.3%)     | 0             | 4 ( 0.1%)     |  |
| Nasal polypectomy                             | 1 (<0.1%)     | 1 (<0.1%)     | 2 (<0.1%)     |  |
| Nasal septal operation                        | 4 ( 0.3%)     | 1 (<0.1%)     | 5 ( 0.2%)     |  |
| Rhinoplasty                                   | 6 ( 0.4%)     | 6 ( 0.4%)     | 12 ( 0.4%)    |  |
| Obstetric therapeutic procedures              | 188 ( 13.1%)  | 159 ( 11.0%)  | 347 ( 12.0%)  |  |
| Caesarean section                             | 187 ( 13.1%)  | 158 ( 10.9%)  | 345 ( 12.0%)  |  |
| Evacuation of retained products of conception | 1 (<0.1%)     | 1 (<0.1%)     | 2 (<0.1%)     |  |
| Orbit and globe therapeutic procedures        | 4 ( 0.3%)     | 8 ( 0.6%)     | 12 ( 0.4%)    |  |
| Eye muscle operation                          | 0             | 3 ( 0.2%)     | 3 ( 0.1%)     |  |
| Strabismus correction                         | 4 ( 0.3%)     | 5 ( 0.3%)     | 9 ( 0.3%)     |  |
| Ovarian therapeutic procedures                | 13 ( 0.9%)    | 11 ( 0.8%)    | 24 ( 0.8%)    |  |
| Oophorectomy                                  | 0             | 1 (<0.1%)     | 1 (<0.1%)     |  |
| Ovarian cystectomy                            | 11 ( 0.8%)    | 10 ( 0.7%)    | 21 ( 0.7%)    |  |
| Ovarian operation                             | 2 ( 0.1%)     | 0             | 2 (<0.1%)     |  |
| Palatal therapeutic procedures                | 1 (<0.1%)     | 0             | 1 (<0.1%)     |  |
| Uvulectomy                                    | 1 (<0.1%)     | 0             | 1 (<0.1%)     |  |
| Paranasal therapeutic procedures              | 2 ( 0.1%)     | 3 ( 0.2%)     | 5 ( 0.2%)     |  |
| Sinus operation                               | 2 ( 0.1%)     | 3 ( 0.2%)     | 5 ( 0.2%)     |  |
| Peripheral nerve therapeutic procedures       | 1 (<0.1%)     | 1 (<0.1%)     | 2 (<0.1%)     |  |
| Carpal tunnel decompression                   | 1 (<0.1%)     | 0             | 1 (<0.1%)     |  |
| Peripheral nerve operation                    | 0             | 1 (<0.1%)     | 1 (<0.1%)     |  |
| Phototherapies                                | 1 (<0.1%)     | 0             | 1 (<0.1%)     |  |
| Laser therapy                                 | 1 (<0.1%)     | 0             | 1 (<0.1%)     |  |
| Prophylactic procedures NEC                   | 1 (<0.1%)     | 2 ( 0.1%)     | 3 ( 0.1%)     |  |
| Antibiotic prophylaxis                        | 0             | 1 (<0.1%)     | 1 (<0.1%)     |  |
| Antiviral prophylaxis                         | 0             | 1 (<0.1%)     | 1 (<0.1%)     |  |
| Prophylaxis                                   | 1 (<0.1%)     | 0             | 1 (<0.1%)     |  |

**Table 14.1.1 / 26: Number of subjects with medical history findings by primary system organ class, high level term, preferred term by treatment (FAS)**

| Primary system organ class                              | LCS12         | LCS16         | Total         |
|---------------------------------------------------------|---------------|---------------|---------------|
| High level term                                         | N=1432 (100%) | N=1452 (100%) | N=2884 (100%) |
| Preferred term                                          |               |               |               |
| MedDRA Version 14.0                                     |               |               |               |
| Salivary gland therapeutic procedures                   | 1 ( <0.1%)    | 0             | 1 ( <0.1%)    |
| Salivary gland resection                                | 1 ( <0.1%)    | 0             | 1 ( <0.1%)    |
| Skin and subcutaneous tissue therapeutic procedures NEC | 1 ( <0.1%)    | 3 ( 0.2%)     | 4 ( 0.1%)     |
| Pilonidal sinus repair                                  | 0             | 3 ( 0.2%)     | 3 ( 0.1%)     |
| Skin operation                                          | 1 ( <0.1%)    | 0             | 1 ( <0.1%)    |
| Skin grafts                                             | 2 ( 0.1%)     | 2 ( 0.1%)     | 4 ( 0.1%)     |
| Skin graft                                              | 2 ( 0.1%)     | 2 ( 0.1%)     | 4 ( 0.1%)     |
| Skin lesion excisions                                   | 15 ( 1.0%)    | 9 ( 0.6%)     | 24 ( 0.8%)    |
| Acrochordon excision                                    | 1 ( <0.1%)    | 0             | 1 ( <0.1%)    |
| Mole excision                                           | 5 ( 0.3%)     | 2 ( 0.1%)     | 7 ( 0.2%)     |
| Scar excision                                           | 2 ( 0.1%)     | 1 ( <0.1%)    | 3 ( 0.1%)     |
| Sebaceous cyst excision                                 | 1 ( <0.1%)    | 0             | 1 ( <0.1%)    |
| Skin neoplasm excision                                  | 0             | 1 ( <0.1%)    | 1 ( <0.1%)    |
| Wart excision                                           | 6 ( 0.4%)     | 5 ( 0.3%)     | 11 ( 0.4%)    |
| Skull and brain therapeutic procedures                  | 0             | 1 ( <0.1%)    | 1 ( <0.1%)    |
| Cranioplasty                                            | 0             | 1 ( <0.1%)    | 1 ( <0.1%)    |
| Small intestine therapeutic procedures                  | 0             | 2 ( 0.1%)     | 2 ( <0.1%)    |
| Ileal operation                                         | 0             | 1 ( <0.1%)    | 1 ( <0.1%)    |
| Small intestinal resection                              | 0             | 1 ( <0.1%)    | 1 ( <0.1%)    |
| Soft tissue therapeutic procedures NEC                  | 10 ( 0.7%)    | 4 ( 0.3%)     | 14 ( 0.5%)    |
| Lipoma excision                                         | 2 ( 0.1%)     | 0             | 2 ( <0.1%)    |
| Liposuction                                             | 8 ( 0.6%)     | 4 ( 0.3%)     | 12 ( 0.4%)    |
| Spine and spinal cord therapeutic procedures            | 3 ( 0.2%)     | 6 ( 0.4%)     | 9 ( 0.3%)     |
| Intervertebral disc operation                           | 2 ( 0.1%)     | 4 ( 0.3%)     | 6 ( 0.2%)     |
| Scoliosis surgery                                       | 1 ( <0.1%)    | 2 ( 0.1%)     | 3 ( 0.1%)     |
| Tendon therapeutic procedures                           | 4 ( 0.3%)     | 6 ( 0.4%)     | 10 ( 0.3%)    |
| Tendon operation                                        | 1 ( <0.1%)    | 2 ( 0.1%)     | 3 ( 0.1%)     |
| Tendon sheath incision                                  | 1 ( <0.1%)    | 0             | 1 ( <0.1%)    |
| Tendon sheath lesion excision                           | 2 ( 0.1%)     | 4 ( 0.3%)     | 6 ( 0.2%)     |
| Therapeutic procedures NEC                              | 16 ( 1.1%)    | 17 ( 1.2%)    | 33 ( 1.1%)    |
| Abscess drainage                                        | 1 ( <0.1%)    | 2 ( 0.1%)     | 3 ( 0.1%)     |
| Adhesiolysis                                            | 2 ( 0.1%)     | 0             | 2 ( <0.1%)    |
| Benign tumour excision                                  | 0             | 3 ( 0.2%)     | 3 ( 0.1%)     |
| Cryotherapy                                             | 2 ( 0.1%)     | 5 ( 0.3%)     | 7 ( 0.2%)     |
| Cyst drainage                                           | 1 ( <0.1%)    | 0             | 1 ( <0.1%)    |
| Cyst removal                                            | 7 ( 0.5%)     | 4 ( 0.3%)     | 11 ( 0.4%)    |
| Exploratory operation                                   | 1 ( <0.1%)    | 0             | 1 ( <0.1%)    |
| Lithotripsy                                             | 1 ( <0.1%)    | 0             | 1 ( <0.1%)    |
| Polypectomy                                             | 0             | 1 ( <0.1%)    | 1 ( <0.1%)    |
| Surgery                                                 | 1 ( <0.1%)    | 1 ( <0.1%)    | 2 ( <0.1%)    |
| Therapeutic procedure                                   | 0             | 1 ( <0.1%)    | 1 ( <0.1%)    |

**Table 14.1.1 / 26: Number of subjects with medical history findings by primary system organ class, high level term, preferred term by treatment (FAS)**

| Primary system organ class                 | LCS12         | LCS16         | Total         |
|--------------------------------------------|---------------|---------------|---------------|
| High level term                            | N=1432 (100%) | N=1452 (100%) | N=2884 (100%) |
| Preferred term                             |               |               |               |
| MedDRA Version 14.0                        |               |               |               |
| Thyroid radiotherapies                     | 1 ( <0.1%)    | 0             | 1 ( <0.1%)    |
| Radioactive iodine therapy                 | 1 ( <0.1%)    | 0             | 1 ( <0.1%)    |
| Thyroid therapeutic procedures             | 3 ( 0.2%)     | 5 ( 0.3%)     | 8 ( 0.3%)     |
| Thyroid adenoma removal                    | 1 ( <0.1%)    | 0             | 1 ( <0.1%)    |
| Thyroidectomy                              | 2 ( 0.1%)     | 5 ( 0.3%)     | 7 ( 0.2%)     |
| Tongue therapeutic procedures              | 0             | 1 ( <0.1%)    | 1 ( <0.1%)    |
| Tongue tie operation                       | 0             | 1 ( <0.1%)    | 1 ( <0.1%)    |
| Tonsillar therapeutic procedures           | 150 ( 10.5%)  | 118 ( 8.1%)   | 268 ( 9.3%)   |
| Adenoidectomy                              | 36 ( 2.5%)    | 21 ( 1.4%)    | 57 ( 2.0%)    |
| Adenotonsillectomy                         | 4 ( 0.3%)     | 18 ( 1.2%)    | 22 ( 0.8%)    |
| Tonsillectomy                              | 127 ( 8.9%)   | 89 ( 6.1%)    | 216 ( 7.5%)   |
| Urethral therapeutic procedures            | 0             | 1 ( <0.1%)    | 1 ( <0.1%)    |
| Urethral dilation procedure                | 0             | 1 ( <0.1%)    | 1 ( <0.1%)    |
| Uterine therapeutic procedures             | 25 ( 1.7%)    | 38 ( 2.6%)    | 63 ( 2.2%)    |
| Endometriosis ablation                     | 1 ( <0.1%)    | 4 ( 0.3%)     | 5 ( 0.2%)     |
| Myomectomy                                 | 0             | 2 ( 0.1%)     | 2 ( <0.1%)    |
| Uterine dilation and curettage             | 19 ( 1.3%)    | 25 ( 1.7%)    | 44 ( 1.5%)    |
| Uterine dilation and evacuation            | 3 ( 0.2%)     | 3 ( 0.2%)     | 6 ( 0.2%)     |
| Uterine operation                          | 0             | 2 ( 0.1%)     | 2 ( <0.1%)    |
| Uterine polypectomy                        | 2 ( 0.1%)     | 3 ( 0.2%)     | 5 ( 0.2%)     |
| Vaginal therapeutic procedures             | 3 ( 0.2%)     | 2 ( 0.1%)     | 5 ( 0.2%)     |
| Hymenectomy                                | 2 ( 0.1%)     | 1 ( <0.1%)    | 3 ( 0.1%)     |
| Vaginal cyst excision                      | 1 ( <0.1%)    | 0             | 1 ( <0.1%)    |
| Vaginal operation                          | 0             | 1 ( <0.1%)    | 1 ( <0.1%)    |
| Venous therapeutic procedures              | 3 ( 0.2%)     | 6 ( 0.4%)     | 9 ( 0.3%)     |
| Varicose vein operation                    | 3 ( 0.2%)     | 6 ( 0.4%)     | 9 ( 0.3%)     |
| Vascular disorders                         | 6 ( 0.4%)     | 9 ( 0.6%)     | 15 ( 0.5%)    |
| Aortic necrosis and vascular insufficiency | 0             | 1 ( <0.1%)    | 1 ( <0.1%)    |
| Aortic stenosis                            | 0             | 1 ( <0.1%)    | 1 ( <0.1%)    |
| Arterial inflammations                     | 0             | 1 ( <0.1%)    | 1 ( <0.1%)    |
| Kawasaki's disease                         | 0             | 1 ( <0.1%)    | 1 ( <0.1%)    |
| Lymphoedemas                               | 1 ( <0.1%)    | 0             | 1 ( <0.1%)    |
| Lymphoedema                                | 1 ( <0.1%)    | 0             | 1 ( <0.1%)    |
| Non-site specific vascular disorders NEC   | 0             | 1 ( <0.1%)    | 1 ( <0.1%)    |
| Vein pain                                  | 0             | 1 ( <0.1%)    | 1 ( <0.1%)    |
| Peripheral vascular disorders NEC          | 0             | 2 ( 0.1%)     | 2 ( <0.1%)    |
| Hot flush                                  | 0             | 1 ( <0.1%)    | 1 ( <0.1%)    |
| Peripheral vascular disorder               | 0             | 1 ( <0.1%)    | 1 ( <0.1%)    |
| Varicose veins non-site specific           | 3 ( 0.2%)     | 1 ( <0.1%)    | 4 ( 0.1%)     |
| Varicose vein                              | 3 ( 0.2%)     | 1 ( <0.1%)    | 4 ( 0.1%)     |

**Table 14.1.1 / 26: Number of subjects with medical history findings by primary system organ class, high level term, preferred term by treatment (FAS)**

| Primary system organ class          |               |               |               |
|-------------------------------------|---------------|---------------|---------------|
| High level term                     |               |               |               |
| Preferred term                      | LCS12         | LCS16         | Total         |
| MedDRA Version 14.0                 | N=1432 (100%) | N=1452 (100%) | N=2884 (100%) |
| Vascular hypertensive disorders NEC | 2 ( 0.1%)     | 3 ( 0.2%)     | 5 ( 0.2%)     |
| Hypertension                        | 2 ( 0.1%)     | 3 ( 0.2%)     | 5 ( 0.2%)     |

Note: A subject is counted only once within each SOC/high level term.

Global Biostatistics: /by-sasp/patdb/projects/de04209/310442/stat/prod\_interim03/pgms/t-mh.sas epkll 07OCT2011 10:49

End of table

**Table 14.1.1 / 27: Gynecological history: Age at menarche, No. of births, vaginal deliveries, abortions, cesarean sections and ectopic pregnancies by treatment - frequencies (FAS)**

|                                           | LCS12 (N=1432) | LCS16 (N=1452) | Total (N=2884) |
|-------------------------------------------|----------------|----------------|----------------|
| Number of subjects                        | 1432 (100.0%)  | 1452 (100.0%)  | 2884 (100.0%)  |
| <b>Menarche, age</b>                      |                |                |                |
| 8                                         | 1 ( <0.1%)     | 0              | 1 ( <0.1%)     |
| 9                                         | 26 ( 1.8%)     | 28 ( 1.9%)     | 54 ( 1.9%)     |
| 10                                        | 70 ( 4.9%)     | 44 ( 3.0%)     | 114 ( 4.0%)    |
| 11                                        | 194 ( 13.5%)   | 217 ( 14.9%)   | 411 ( 14.3%)   |
| 12                                        | 398 ( 27.8%)   | 441 ( 30.4%)   | 839 ( 29.1%)   |
| 13                                        | 391 ( 27.3%)   | 384 ( 26.4%)   | 775 ( 26.9%)   |
| 14                                        | 203 ( 14.2%)   | 216 ( 14.9%)   | 419 ( 14.5%)   |
| 15                                        | 99 ( 6.9%)     | 80 ( 5.5%)     | 179 ( 6.2%)    |
| 16                                        | 39 ( 2.7%)     | 26 ( 1.8%)     | 65 ( 2.3%)     |
| 17                                        | 6 ( 0.4%)      | 12 ( 0.8%)     | 18 ( 0.6%)     |
| 18                                        | 4 ( 0.3%)      | 4 ( 0.3%)      | 8 ( 0.3%)      |
| 19                                        | 1 ( <0.1%)     | 0              | 1 ( <0.1%)     |
| <b>No. of births</b>                      |                |                |                |
| 0                                         | 556 ( 38.8%)   | 574 ( 39.5%)   | 1130 ( 39.2%)  |
| 1                                         | 320 ( 22.3%)   | 333 ( 22.9%)   | 653 ( 22.6%)   |
| 2                                         | 397 ( 27.7%)   | 407 ( 28.0%)   | 804 ( 27.9%)   |
| 3                                         | 128 ( 8.9%)    | 113 ( 7.8%)    | 241 ( 8.4%)    |
| 4                                         | 26 ( 1.8%)     | 20 ( 1.4%)     | 46 ( 1.6%)     |
| 5                                         | 3 ( 0.2%)      | 4 ( 0.3%)      | 7 ( 0.2%)      |
| 6                                         | 2 ( 0.1%)      | 1 ( <0.1%)     | 3 ( 0.1%)      |
| <b>Vaginal deliveries, number missing</b> |                |                |                |
| 0                                         | 743 ( 51.9%)   | 743 ( 51.2%)   | 1486 ( 51.5%)  |
| 1                                         | 269 ( 18.8%)   | 275 ( 18.9%)   | 544 ( 18.9%)   |
| 2                                         | 290 ( 20.3%)   | 328 ( 22.6%)   | 618 ( 21.4%)   |
| 3                                         | 102 ( 7.1%)    | 87 ( 6.0%)     | 189 ( 6.6%)    |
| 4                                         | 22 ( 1.5%)     | 14 ( 1.0%)     | 36 ( 1.2%)     |
| 5                                         | 1 ( <0.1%)     | 4 ( 0.3%)      | 5 ( 0.2%)      |
| 6                                         | 3 ( 0.2%)      | 0              | 3 ( 0.1%)      |



**Table 14.1.1 / 27: Gynecological history: Age at menarche, No. of births, vaginal deliveries, abortions, cesarean sections and ectopic pregnancies by treatment - frequencies (FAS)**

|                                    | LCS12 (N=1432) | LCS16 (N=1452) | Total (N=2884) |
|------------------------------------|----------------|----------------|----------------|
| <b>No. of abortions</b>            |                |                |                |
| missing                            | 1 ( <0.1%)     | 1 ( <0.1%)     | 2 ( <0.1%)     |
| 0                                  | 1041 ( 72.7%)  | 1054 ( 72.6%)  | 2095 ( 72.6%)  |
| 1                                  | 261 ( 18.2%)   | 277 ( 19.1%)   | 538 ( 18.7%)   |
| 2                                  | 96 ( 6.7%)     | 87 ( 6.0%)     | 183 ( 6.3%)    |
| 3                                  | 24 ( 1.7%)     | 21 ( 1.4%)     | 45 ( 1.6%)     |
| 4                                  | 7 ( 0.5%)      | 10 ( 0.7%)     | 17 ( 0.6%)     |
| 5                                  | 1 ( <0.1%)     | 2 ( 0.1%)      | 3 ( 0.1%)      |
| 7                                  | 1 ( <0.1%)     | 0              | 1 ( <0.1%)     |
| <b>Cesarean sections, number</b>   |                |                |                |
| missing                            | 1 ( <0.1%)     | 1 ( <0.1%)     | 2 ( <0.1%)     |
| 0                                  | 1166 ( 81.4%)  | 1216 ( 83.7%)  | 2382 ( 82.6%)  |
| 1                                  | 173 ( 12.1%)   | 160 ( 11.0%)   | 333 ( 11.5%)   |
| 2                                  | 84 ( 5.9%)     | 64 ( 4.4%)     | 148 ( 5.1%)    |
| 3                                  | 8 ( 0.6%)      | 11 ( 0.8%)     | 19 ( 0.7%)     |
| <b>Ectopic pregnancies, number</b> |                |                |                |
| missing                            | 2 ( 0.1%)      | 3 ( 0.2%)      | 5 ( 0.2%)      |
| 0                                  | 1430 ( 99.9%)  | 1449 ( 99.8%)  | 2879 ( 99.8%)  |

Global Biostatistics: /by-sasp/patdb/projects/de04209/310442/stat/prod\_interim03/pgms/t-dm-gyn-history.sas epkll 07OCT2011 10:49

End of table

**Table 14.1.1 / 28: Gynecological history: Age at menarche, No. of births, vaginal deliveries, abortions, cesarean sections, and ectopic pregnancies - descriptive statistics by treatment (FAS)**

|                             |       | TREATMENT | n    | Nmiss | Mean | SD  | Min | Q1   | Median | Q3   | Max |
|-----------------------------|-------|-----------|------|-------|------|-----|-----|------|--------|------|-----|
| Menarche, age               | years | LCS12     | 1432 | 0     | 12.6 | 1.5 | 8   | 12.0 | 13.0   | 13.0 | 19  |
|                             |       | LCS16     | 1452 | 0     | 12.6 | 1.4 | 9   | 12.0 | 12.0   | 13.0 | 18  |
|                             |       | Total     | 2884 | 0     | 12.6 | 1.5 | 8   | 12.0 | 13.0   | 13.0 | 19  |
| No. of births               |       | LCS12     | 1432 | 0     | 1.1  | 1.1 | 0   | 0.0  | 1.0    | 2.0  | 6   |
|                             |       | LCS16     | 1452 | 0     | 1.1  | 1.1 | 0   | 0.0  | 1.0    | 2.0  | 6   |
|                             |       | Total     | 2884 | 0     | 1.1  | 1.1 | 0   | 0.0  | 1.0    | 2.0  | 6   |
| Vaginal deliveries, number  |       | LCS12     | 1430 | 2     | 0.9  | 1.1 | 0   | 0.0  | 0.0    | 2.0  | 6   |
|                             |       | LCS16     | 1451 | 1     | 0.9  | 1.0 | 0   | 0.0  | 0.0    | 2.0  | 5   |
|                             |       | Total     | 2881 | 3     | 0.9  | 1.1 | 0   | 0.0  | 0.0    | 2.0  | 6   |
| No. of abortions            |       | LCS12     | 1431 | 1     | 0.4  | 0.8 | 0   | 0.0  | 0.0    | 1.0  | 7   |
|                             |       | LCS16     | 1451 | 1     | 0.4  | 0.7 | 0   | 0.0  | 0.0    | 1.0  | 5   |
|                             |       | Total     | 2882 | 2     | 0.4  | 0.8 | 0   | 0.0  | 0.0    | 1.0  | 7   |
| Cesarean sections, number   |       | LCS12     | 1431 | 1     | 0.3  | 0.6 | 0   | 0.0  | 0.0    | 0.0  | 3   |
|                             |       | LCS16     | 1451 | 1     | 0.2  | 0.6 | 0   | 0.0  | 0.0    | 0.0  | 3   |
|                             |       | Total     | 2882 | 2     | 0.2  | 0.6 | 0   | 0.0  | 0.0    | 0.0  | 3   |
| Ectopic pregnancies, number |       | LCS12     | 1430 | 2     | 0.0  | 0.0 | 0   | 0.0  | 0.0    | 0.0  | 0   |
|                             |       | LCS16     | 1449 | 3     | 0.0  | 0.0 | 0   | 0.0  | 0.0    | 0.0  | 0   |
|                             |       | Total     | 2879 | 5     | 0.0  | 0.0 | 0   | 0.0  | 0.0    | 0.0  | 0   |

Global Biostatistics: /by-sasp/patdb/projects/de04209/310442/stat/prod\_interim03/pgms/t-dm-gyn-history.sas epkll 07OCT2011 10:49

End of table

**Table 14.1.1 / 29: Contraceptive methods at screening visit by treatment (FAS)**

| Contraceptive method   | LCS12 N=1432 (100%) | LCS16 N=1452 (100%) | Total N=2884 (100%) |
|------------------------|---------------------|---------------------|---------------------|
| no                     | 152 ( 10.6%)        | 163 ( 11.2%)        | 315 ( 10.9%)        |
| condom                 | 592 ( 41.3%)        | 585 ( 40.3%)        | 1177 ( 40.8%)       |
| OC                     | 461 ( 32.2%)        | 493 ( 34.0%)        | 954 ( 33.1%)        |
| diaphragm              | 1 ( <0.1%)          | 0                   | 1 ( <0.1%)          |
| IUD containing hormone | 48 ( 3.4%)          | 40 ( 2.8%)          | 88 ( 3.1%)          |
| implant                | 7 ( 0.5%)           | 6 ( 0.4%)           | 13 ( 0.5%)          |
| IUD non hormonal       | 69 ( 4.8%)          | 59 ( 4.1%)          | 128 ( 4.4%)         |
| other                  | 102 ( 7.1%)         | 106 ( 7.3%)         | 208 ( 7.2%)         |

Global Biostatistics: /by-sasp/patdb/projects/de04209/310442/stat/prod\_interim03/pgms/t-dm-gyn-history.sas epkll 07OCT2011 10:49

End of table

**Table 14.1.1 / 30: Menstrual history: Cycle regularity, length of cycle, duration of menstruation, intensity of bleeding and intracyclic vaginal bleeding by treatment (FAS)**

|                                           | LCS12 (N=1432) | LCS16 (N=1452) | Total (N=2884) |
|-------------------------------------------|----------------|----------------|----------------|
| <b>Cycle, regularity</b>                  |                |                |                |
| Number of Subjects                        | 1432 (100.0%)  | 1452 (100.0%)  | 2884 (100.0%)  |
| missing                                   | 0              | 2 ( 0.1%)      | 2 (<0.1%)      |
| regular                                   | 1419 ( 99.1%)  | 1433 ( 98.7%)  | 2852 ( 98.9%)  |
| irregular                                 | 13 ( 0.9%)     | 17 ( 1.2%)     | 30 ( 1.0%)     |
| <b>Cycle average length (days)</b>        |                |                |                |
| Mean                                      | 28.5           | 28.3           | 28.4           |
| SD                                        | 2.6            | 2.2            | 2.4            |
| Min                                       | 21             | 0              | 0              |
| Q1                                        | 28.0           | 28.0           | 28.0           |
| Median                                    | 28.0           | 28.0           | 28.0           |
| Q3                                        | 30.0           | 29.0           | 30.0           |
| Max                                       | 90             | 36             | 90             |
| <b>Menstruation average length (days)</b> |                |                |                |
| Mean                                      | 4.9            | 5.0            | 5.0            |
| SD                                        | 1.3            | 1.3            | 1.3            |
| Min                                       | 1              | 0              | 0              |
| Q1                                        | 4.0            | 4.0            | 4.0            |
| Median                                    | 5.0            | 5.0            | 5.0            |
| Q3                                        | 6.0            | 6.0            | 6.0            |
| Max                                       | 14             | 12             | 14             |
| <b>Average intensity of bleeding</b>      |                |                |                |
| Number of Subjects                        | 1432 (100.0%)  | 1452 (100.0%)  | 2884 (100.0%)  |
| missing                                   | 1 (<0.1%)      | 0              | 1 (<0.1%)      |
| none                                      | 1 (<0.1%)      | 3 ( 0.2%)      | 4 ( 0.1%)      |
| spotting                                  | 8 ( 0.6%)      | 5 ( 0.3%)      | 13 ( 0.5%)     |
| light                                     | 189 ( 13.2%)   | 187 ( 12.9%)   | 376 ( 13.0%)   |
| normal                                    | 907 ( 63.3%)   | 925 ( 63.7%)   | 1832 ( 63.5%)  |
| heavy                                     | 326 ( 22.8%)   | 332 ( 22.9%)   | 658 ( 22.8%)   |
| <b>Vaginal bleeding, intracyclic</b>      |                |                |                |
| Number of Subjects                        | 1432 (100.0%)  | 1452 (100.0%)  | 2884 (100.0%)  |
| missing                                   | 2 ( 0.1%)      | 0              | 2 (<0.1%)      |
| no                                        | 1404 ( 98.0%)  | 1417 ( 97.6%)  | 2821 ( 97.8%)  |
| yes                                       | 26 ( 1.8%)     | 35 ( 2.4%)     | 61 ( 2.1%)     |

**Table 14.1.1 / 31: Vaginal ultrasound: Uterus (portio-fundus) by treatment (FAS)**

|               |      | TREATMENT | n    | Nmiss | Mean | SD   | Min | Q1   | Median | Q3   | Max |
|---------------|------|-----------|------|-------|------|------|-----|------|--------|------|-----|
| Uterus length | (mm) | LCS12     | 1214 | 7     | 72.0 | 12.3 | 7   | 64.0 | 72.0   | 80.0 | 120 |
|               |      | LCS16     | 1221 | 6     | 72.2 | 12.4 | 8   | 64.0 | 72.0   | 80.0 | 124 |
|               |      | Total     | 2435 | 13    | 72.1 | 12.4 | 7   | 64.0 | 72.0   | 80.0 | 124 |

Global Biostatistics: /by-sasp/patdb/projects/de04209/310442/stat/prod\_interim03/pgms/t-dm-gyn-history.sas epkl 07OCT2011 10:49  
 End of table

**Table 14.1.1 / 32: Vaginal ultrasound: Uterus: Max. width anteroposterior by treatment (FAS)**

|                                      |      | TREATMENT | n    | Nmiss | Mean | SD   | Min | Q1   | Median | Q3   | Max |
|--------------------------------------|------|-----------|------|-------|------|------|-----|------|--------|------|-----|
| Uterus maximal anteroposterior width | (mm) | LCS12     | 1214 | 7     | 37.4 | 13.7 | 3   | 31.0 | 37.0   | 42.0 | 426 |
|                                      |      | LCS16     | 1222 | 5     | 37.0 | 8.1  | 4   | 31.0 | 37.0   | 42.0 | 70  |
|                                      |      | Total     | 2436 | 12    | 37.2 | 11.3 | 3   | 31.0 | 37.0   | 42.0 | 426 |

Global Biostatistics: /by-sasp/patdb/projects/de04209/310442/stat/prod\_interim03/pgms/t-dm-gyn-history.sas epkl 07OCT2011 10:49  
 End of table

**Table 14.1.1 / 33: Vaginal ultrasound: Uterus: Max. width transverse by treatment (FAS)**

|                                         | TREATMENT | n    | Nmiss | Mean | SD   | Min | Q1   | Median | Q3   | Max |
|-----------------------------------------|-----------|------|-------|------|------|-----|------|--------|------|-----|
| Uterus maximal transverse width<br>(mm) | LCS12     | 1205 | 16    | 46.4 | 10.4 | 4   | 40.0 | 46.0   | 53.0 | 86  |
|                                         | LCS16     | 1214 | 13    | 46.9 | 10.2 | 23  | 40.0 | 46.0   | 54.0 | 92  |
|                                         | Total     | 2419 | 29    | 46.6 | 10.3 | 4   | 40.0 | 46.0   | 53.0 | 92  |

Global Biostatistics: /by-sasp/patdb/projects/de04209/310442/stat/prod\_interim03/pgms/t-dm-gyn-history.sas epkll 07OCT2011 10:49  
 End of table

**Table 14.1.1 / 34: Vaginal ultrasound: Uterus: Length of the cavity by treatment (FAS)**

|                       |      | TREATMENT | n    | Nmiss | Mean | SD   | Min | Q1   | Median | Q3   | Max |
|-----------------------|------|-----------|------|-------|------|------|-----|------|--------|------|-----|
| Uterus, cavity length | (mm) | LCS12     | 1177 | 44    | 41.1 | 13.4 | 3   | 32.0 | 38.0   | 47.0 | 90  |
|                       |      | LCS16     | 1184 | 43    | 41.3 | 13.6 | 3   | 32.0 | 38.0   | 48.0 | 96  |
|                       |      | Total     | 2361 | 87    | 41.2 | 13.5 | 3   | 32.0 | 38.0   | 47.0 | 96  |

Global Biostatistics: /by-sasp/patdb/projects/de04209/310442/stat/prod\_interim03/pgms/t-dm-gyn-history.sas epkl 07OCT2011 10:49  
 End of table



**Table 14.1.1 / 35: Vaginal ultrasound: Other uterine abnormalities by treatment (FAS)**

|                             | LCS12 N=1432 (100%) | LCS16 N=1452 (100%) | Total N=2884 (100%) |
|-----------------------------|---------------------|---------------------|---------------------|
| Uterus, other abnormalities |                     |                     |                     |
| missing                     | 2 ( 0.1%)           | 1 (<0.1%)           | 3 ( 0.1%)           |
| no                          | 1206 ( 84.2%)       | 1209 ( 83.3%)       | 2415 ( 83.7%)       |
| yes                         | 13 ( 0.9%)          | 17 ( 1.2%)          | 30 ( 1.0%)          |

Global Biostatistics: /by-sasp/patdb/projects/de04209/310442/stat/prod\_interim03/pgms/t-dm-gyn-history.sas epkll 07OCT2011 10:49

End of table

**Table 14.1.1 / 36: Listing of specified other uterine abnormalities by treatment (FAS)**

| TREATMENT | Subject number                            | Uterus, other abnormalities text                                               |                              |
|-----------|-------------------------------------------|--------------------------------------------------------------------------------|------------------------------|
| LCS12     | 140105                                    | UTERINE RETROVERSION.                                                          |                              |
|           | 140113                                    | CERVIX NABOTH CYST                                                             |                              |
|           | 140605                                    | C-SECTION SCAR                                                                 |                              |
|           | 140807                                    | IUD IN PLACE.                                                                  |                              |
|           | 140904                                    | QUERY ADENOMYOSIS                                                              |                              |
|           | 140911                                    | ARCUATE                                                                        |                              |
|           | 160962                                    | CS SCAR IN LOWER SEGMENT OF THE UTERUS                                         |                              |
|           | 180603                                    | NON HORMONAL IUD IN SITU                                                       |                              |
|           | 230501                                    | UTERUS VERY CURVED.                                                            |                              |
|           | 240209                                    | WIDENED UPPER BODY AND BREAK OF THE ENDOMETRIUM SUSPECT UTERUS SUBSEPTUS - NCS |                              |
|           | 241113                                    | LT. HORN SMALL HYPERECHOIC AREA, LINING                                        |                              |
|           | 243309                                    | EVIDENCE OF C-SECTION INCISION AT UTERINE NECK                                 |                              |
|           | 245907                                    | FOCAL ADENOMYSOS NO DEVIATION OF CAVITY WITH SALINE ULTRASOUND NCS             |                              |
|           | LCS16                                     | 140901                                                                         | ARCUATE UTERUS               |
|           |                                           | 140909                                                                         | HETEROGENOUS C-SECTION SCAN. |
| 140916    |                                           | ARCUATE                                                                        |                              |
| 160719    |                                           | THE UTERINE CAVITY IS SMALL                                                    |                              |
| 161222    |                                           | CYSTA/MYOMA INTRAMURALIS 4X6MM                                                 |                              |
| 170803    |                                           | CESAREAN SCAR VISIBLE.                                                         |                              |
| 200232    |                                           | PREGNANT                                                                       |                              |
| 241117    |                                           | RETROVERTED UTERUS                                                             |                              |
| 241118    |                                           | RETROVERTED UTERUS                                                             |                              |
| 241138    |                                           | HYPERECHOIC AREA LINING - NCS SMALL FLAT POLYP                                 |                              |
| 241152    |                                           | NABOTHIAN CYSTS - NCS                                                          |                              |
| 242803    |                                           | ADENOMYOSIS                                                                    |                              |
| 242813    |                                           | ADENOMYOSIS                                                                    |                              |
| 242814    |                                           | ADENOMYOSIS                                                                    |                              |
| 243316    |                                           | INCREASED VASCULARITY NOTED IN THE PERIPHERY OF THE UTERINE WALLS              |                              |
| 243401    | HYPERECHORIC SMALL AREAS WITHIN POSTERIOR |                                                                                |                              |
| 244405    | 4ML FLUID IN ENDOMETRIUM                  |                                                                                |                              |

Global Biostatistics: /by-sasp/patdb/projects/de04209/310442/stat/prod\_interim03/pgms/t-dm-gyn-history.sas epkll 07OCT2011 10:49  
 End of table

**Table 14.1.1 / 37: Number of subjects who took at least one prior medication (FAS)**

| Substance                                                 | LCS12<br>N=1432 (100%) | LCS16<br>N=1452 (100%) | Total<br>N=2884 (100%) |
|-----------------------------------------------------------|------------------------|------------------------|------------------------|
| Number of subjects (%) with at least one prior medication | 792 ( 55.3%)           | 822 ( 56.6%)           | 1614 ( 56.0%)          |
| ETHINYLESTRADIOL                                          | 427 ( 29.8%)           | 474 ( 32.6%)           | 901 ( 31.2%)           |
| LEVONORGESTREL                                            | 133 ( 9.3%)            | 129 ( 8.9%)            | 262 ( 9.1%)            |
| DROSPIRENONE                                              | 109 ( 7.6%)            | 126 ( 8.7%)            | 235 ( 8.1%)            |
| IBUPROFEN                                                 | 74 ( 5.2%)             | 77 ( 5.3%)             | 151 ( 5.2%)            |
| PARACETAMOL                                               | 70 ( 4.9%)             | 75 ( 5.2%)             | 145 ( 5.0%)            |
| DESOGESTREL                                               | 65 ( 4.5%)             | 69 ( 4.8%)             | 134 ( 4.6%)            |
| ETONOGESTREL                                              | 51 ( 3.6%)             | 61 ( 4.2%)             | 112 ( 3.9%)            |
| GESTODENE                                                 | 46 ( 3.2%)             | 52 ( 3.6%)             | 98 ( 3.4%)             |
| NORGESTIMATE                                              | 36 ( 2.5%)             | 41 ( 2.8%)             | 77 ( 2.7%)             |
| INTRAUTERINE CONTRACEPTIVE DEVICE                         | 36 ( 2.5%)             | 29 ( 2.0%)             | 65 ( 2.3%)             |
| NORETHISTERONE ACETATE                                    | 27 ( 1.9%)             | 31 ( 2.1%)             | 58 ( 2.0%)             |
| AZITHROMYCIN                                              | 28 ( 2.0%)             | 27 ( 1.9%)             | 55 ( 1.9%)             |
| NORETHISTERONE                                            | 31 ( 2.2%)             | 21 ( 1.4%)             | 52 ( 1.8%)             |
| METRONIDAZOLE                                             | 26 ( 1.8%)             | 23 ( 1.6%)             | 49 ( 1.7%)             |
| FERROUS FUMARATE                                          | 20 ( 1.4%)             | 21 ( 1.4%)             | 41 ( 1.4%)             |
| CYPROTERONE ACETATE                                       | 20 ( 1.4%)             | 19 ( 1.3%)             | 39 ( 1.4%)             |
| FLUCONAZOLE                                               | 18 ( 1.3%)             | 17 ( 1.2%)             | 35 ( 1.2%)             |
| PSEUDOEPHEDRINE HYDROCHLORIDE                             | 16 ( 1.1%)             | 19 ( 1.3%)             | 35 ( 1.2%)             |
| NORELGESTROMIN                                            | 16 ( 1.1%)             | 11 ( 0.8%)             | 27 ( 0.9%)             |
| AMOXICILLIN                                               | 17 ( 1.2%)             | 9 ( 0.6%)              | 26 ( 0.9%)             |
| DEXTROMETHORPHAN HYDROBROMIDE                             | 12 ( 0.8%)             | 10 ( 0.7%)             | 22 ( 0.8%)             |
| CAFFEINE                                                  | 10 ( 0.7%)             | 8 ( 0.6%)              | 18 ( 0.6%)             |
| DOXYCYCLINE                                               | 5 ( 0.3%)              | 13 ( 0.9%)             | 18 ( 0.6%)             |
| MISOPROSTOL                                               | 8 ( 0.6%)              | 9 ( 0.6%)              | 17 ( 0.6%)             |
| NAPROXEN                                                  | 9 ( 0.6%)              | 7 ( 0.5%)              | 16 ( 0.6%)             |
| ACETYLSALICYLIC ACID                                      | 8 ( 0.6%)              | 7 ( 0.5%)              | 15 ( 0.5%)             |
| NAPROXEN SODIUM                                           | 8 ( 0.6%)              | 7 ( 0.5%)              | 15 ( 0.5%)             |
| CEFALEXIN                                                 | 6 ( 0.4%)              | 8 ( 0.6%)              | 14 ( 0.5%)             |
| CODEINE PHOSPHATE                                         | 10 ( 0.7%)             | 4 ( 0.3%)              | 14 ( 0.5%)             |
| NITROFURANTOIN                                            | 7 ( 0.5%)              | 7 ( 0.5%)              | 14 ( 0.5%)             |
| CLINDAMYCIN PHOSPHATE                                     | 7 ( 0.5%)              | 6 ( 0.4%)              | 13 ( 0.5%)             |
| CLOTRIMAZOLE                                              | 7 ( 0.5%)              | 6 ( 0.4%)              | 13 ( 0.5%)             |
| NEOMYCIN SULFATE                                          | 9 ( 0.6%)              | 4 ( 0.3%)              | 13 ( 0.5%)             |
| NYSTATIN                                                  | 7 ( 0.5%)              | 6 ( 0.4%)              | 13 ( 0.5%)             |
| CHLORPHENAMINE MALEATE                                    | 8 ( 0.6%)              | 4 ( 0.3%)              | 12 ( 0.4%)             |
| INTRAUTERINE CONTRACEPTIVES                               | 6 ( 0.4%)              | 5 ( 0.3%)              | 11 ( 0.4%)             |
| LORATADINE                                                | 5 ( 0.3%)              | 6 ( 0.4%)              | 11 ( 0.4%)             |
| POLYMYXIN B SULFATE                                       | 7 ( 0.5%)              | 4 ( 0.3%)              | 11 ( 0.4%)             |
| CIPROFLOXACIN                                             | 5 ( 0.3%)              | 5 ( 0.3%)              | 10 ( 0.3%)             |
| DICLOFENAC                                                | 7 ( 0.5%)              | 3 ( 0.2%)              | 10 ( 0.3%)             |
| TRIMETHOPRIM                                              | 4 ( 0.3%)              | 6 ( 0.4%)              | 10 ( 0.3%)             |
| CLAVULANATE POTASSIUM                                     | 6 ( 0.4%)              | 3 ( 0.2%)              | 9 ( 0.3%)              |

**Table 14.1.1 / 37: Number of subjects who took at least one prior medication (FAS)**

| Substance                            | LCS12<br>N=1432 (100%) | LCS16<br>N=1452 (100%) | Total<br>N=2884 (100%) |
|--------------------------------------|------------------------|------------------------|------------------------|
| MINERALS NOS                         | 4 ( 0.3%)              | 5 ( 0.3%)              | 9 ( 0.3%)              |
| ASCORBIC ACID                        | 4 ( 0.3%)              | 4 ( 0.3%)              | 8 ( 0.3%)              |
| DIPHENHYDRAMINE HYDROCHLORIDE        | 4 ( 0.3%)              | 4 ( 0.3%)              | 8 ( 0.3%)              |
| DOXYLAMINE SUCCINATE                 | 5 ( 0.3%)              | 3 ( 0.2%)              | 8 ( 0.3%)              |
| ETHANOL                              | 5 ( 0.3%)              | 3 ( 0.2%)              | 8 ( 0.3%)              |
| FERROUS SULFATE                      | 4 ( 0.3%)              | 4 ( 0.3%)              | 8 ( 0.3%)              |
| MICONAZOLE NITRATE                   | 5 ( 0.3%)              | 3 ( 0.2%)              | 8 ( 0.3%)              |
| POVIDONE-IODINE                      | 3 ( 0.2%)              | 5 ( 0.3%)              | 8 ( 0.3%)              |
| AMPICILLIN                           | 3 ( 0.2%)              | 4 ( 0.3%)              | 7 ( 0.2%)              |
| EPHEDRINE SULFATE                    | 5 ( 0.3%)              | 2 ( 0.1%)              | 7 ( 0.2%)              |
| LEVOFLOXACIN                         | 4 ( 0.3%)              | 3 ( 0.2%)              | 7 ( 0.2%)              |
| PHENOXYMETHYLPENICILLIN POTASSIUM    | 5 ( 0.3%)              | 2 ( 0.1%)              | 7 ( 0.2%)              |
| PHENYLEPHRINE HYDROCHLORIDE          | 3 ( 0.2%)              | 4 ( 0.3%)              | 7 ( 0.2%)              |
| AMOXICILLIN TRIHYDRATE               | 3 ( 0.2%)              | 3 ( 0.2%)              | 6 ( 0.2%)              |
| CHLORPHENAMINE                       | 2 ( 0.1%)              | 4 ( 0.3%)              | 6 ( 0.2%)              |
| GUAIFENESIN                          | 2 ( 0.1%)              | 4 ( 0.3%)              | 6 ( 0.2%)              |
| HEPATITIS A VACCINE                  | 3 ( 0.2%)              | 3 ( 0.2%)              | 6 ( 0.2%)              |
| HYDROCODONE                          | 2 ( 0.1%)              | 4 ( 0.3%)              | 6 ( 0.2%)              |
| HYDROCODONE BITARTRATE               | 2 ( 0.1%)              | 4 ( 0.3%)              | 6 ( 0.2%)              |
| SULFAMETHOXAZOLE                     | 1 (<0.1%)              | 5 ( 0.3%)              | 6 ( 0.2%)              |
| VIRAL VACCINES                       | 2 ( 0.1%)              | 4 ( 0.3%)              | 6 ( 0.2%)              |
| VITAMIN B NOS                        | 1 (<0.1%)              | 5 ( 0.3%)              | 6 ( 0.2%)              |
| AMOXICILLIN SODIUM                   | 3 ( 0.2%)              | 2 ( 0.1%)              | 5 ( 0.2%)              |
| BIOTIN                               | 1 (<0.1%)              | 4 ( 0.3%)              | 5 ( 0.2%)              |
| CLARITHROMYCIN                       | 4 ( 0.3%)              | 1 (<0.1%)              | 5 ( 0.2%)              |
| CLINDAMYCIN HYDROCHLORIDE            | 4 ( 0.3%)              | 1 (<0.1%)              | 5 ( 0.2%)              |
| DOXYCYCLINE MONOHYDRATE              | 4 ( 0.3%)              | 1 (<0.1%)              | 5 ( 0.2%)              |
| DYDROGESTERONE                       | 4 ( 0.3%)              | 1 (<0.1%)              | 5 ( 0.2%)              |
| FOLIC ACID                           | 2 ( 0.1%)              | 3 ( 0.2%)              | 5 ( 0.2%)              |
| LOPERAMIDE HYDROCHLORIDE             | 3 ( 0.2%)              | 2 ( 0.1%)              | 5 ( 0.2%)              |
| NICOTINIC ACID                       | 1 (<0.1%)              | 4 ( 0.3%)              | 5 ( 0.2%)              |
| PIVMECILLINAM                        | 4 ( 0.3%)              | 1 (<0.1%)              | 5 ( 0.2%)              |
| RETINOL                              | 1 (<0.1%)              | 4 ( 0.3%)              | 5 ( 0.2%)              |
| SERTRALINE                           | 3 ( 0.2%)              | 2 ( 0.1%)              | 5 ( 0.2%)              |
| TOCOPHEROL                           | 1 (<0.1%)              | 4 ( 0.3%)              | 5 ( 0.2%)              |
| VITAMIN D NOS                        | 1 (<0.1%)              | 4 ( 0.3%)              | 5 ( 0.2%)              |
| VITAMINS NOS                         | 4 ( 0.3%)              | 1 (<0.1%)              | 5 ( 0.2%)              |
| BETA-LACTAMASE SENSITIVE PENICILLINS | 1 (<0.1%)              | 3 ( 0.2%)              | 4 ( 0.1%)              |
| BUDESONIDE                           | 4 ( 0.3%)              | 0                      | 4 ( 0.1%)              |
| CLINDAMYCIN                          | 2 ( 0.1%)              | 2 ( 0.1%)              | 4 ( 0.1%)              |
| CYCLOBENZAPRINE HYDROCHLORIDE        | 3 ( 0.2%)              | 1 (<0.1%)              | 4 ( 0.1%)              |
| HYDROCORTISONE                       | 3 ( 0.2%)              | 1 (<0.1%)              | 4 ( 0.1%)              |
| MEPYRAMINE MALEATE                   | 0                      | 4 ( 0.3%)              | 4 ( 0.1%)              |
| MESTRANOL                            | 3 ( 0.2%)              | 1 (<0.1%)              | 4 ( 0.1%)              |
| METHOCARBAMOL                        | 2 ( 0.1%)              | 2 ( 0.1%)              | 4 ( 0.1%)              |

**Table 14.1.1 / 37: Number of subjects who took at least one prior medication (FAS)**

| Substance                                    | LCS12<br>N=1432 (100%) | LCS16<br>N=1452 (100%) | Total<br>N=2884 (100%) |
|----------------------------------------------|------------------------|------------------------|------------------------|
| NORGESTREL                                   | 1 (<0.1%)              | 3 ( 0.2%)              | 4 ( 0.1%)              |
| OMEPRAZOLE                                   | 1 (<0.1%)              | 3 ( 0.2%)              | 4 ( 0.1%)              |
| PARGEVERINE                                  | 1 (<0.1%)              | 3 ( 0.2%)              | 4 ( 0.1%)              |
| PHENAZOPYRIDINE HYDROCHLORIDE                | 2 ( 0.1%)              | 2 ( 0.1%)              | 4 ( 0.1%)              |
| SUMATRIPTAN                                  | 2 ( 0.1%)              | 2 ( 0.1%)              | 4 ( 0.1%)              |
| TIZANIDINE HYDROCHLORIDE                     | 1 (<0.1%)              | 3 ( 0.2%)              | 4 ( 0.1%)              |
| UNCODEABLE "UNCLASSIFIABLE"                  | 0                      | 4 ( 0.3%)              | 4 ( 0.1%)              |
| ZOLPIDEM TARTRATE                            | 2 ( 0.1%)              | 2 ( 0.1%)              | 4 ( 0.1%)              |
| ACICLOVIR                                    | 1 (<0.1%)              | 2 ( 0.1%)              | 3 ( 0.1%)              |
| ACRIVASTINE                                  | 2 ( 0.1%)              | 1 (<0.1%)              | 3 ( 0.1%)              |
| ALPRAZOLAM                                   | 1 (<0.1%)              | 2 ( 0.1%)              | 3 ( 0.1%)              |
| AMBROXOL                                     | 1 (<0.1%)              | 2 ( 0.1%)              | 3 ( 0.1%)              |
| ANILIDES                                     | 2 ( 0.1%)              | 1 (<0.1%)              | 3 ( 0.1%)              |
| BETAMETHASONE                                | 0                      | 3 ( 0.2%)              | 3 ( 0.1%)              |
| BROMHEXINE HYDROCHLORIDE                     | 1 (<0.1%)              | 2 ( 0.1%)              | 3 ( 0.1%)              |
| BUPROPION                                    | 2 ( 0.1%)              | 1 (<0.1%)              | 3 ( 0.1%)              |
| CETIRIZINE HYDROCHLORIDE                     | 1 (<0.1%)              | 2 ( 0.1%)              | 3 ( 0.1%)              |
| CLONIXIN LYSINATE                            | 2 ( 0.1%)              | 1 (<0.1%)              | 3 ( 0.1%)              |
| CO-TRIMOXAZOLE                               | 1 (<0.1%)              | 2 ( 0.1%)              | 3 ( 0.1%)              |
| CYANOCOBALAMIN                               | 1 (<0.1%)              | 2 ( 0.1%)              | 3 ( 0.1%)              |
| DEXTROPROPOXYPHENE NAPSILATE                 | 1 (<0.1%)              | 2 ( 0.1%)              | 3 ( 0.1%)              |
| DIET FORMULATIONS FOR TREATMENT OF OBESITY   | 1 (<0.1%)              | 2 ( 0.1%)              | 3 ( 0.1%)              |
| DULOXETINE HYDROCHLORIDE                     | 2 ( 0.1%)              | 1 (<0.1%)              | 3 ( 0.1%)              |
| ECONAZOLE                                    | 2 ( 0.1%)              | 1 (<0.1%)              | 3 ( 0.1%)              |
| ERGOTAMINE TARTRATE                          | 3 ( 0.2%)              | 0                      | 3 ( 0.1%)              |
| ESTRADIOL VALERATE                           | 0                      | 3 ( 0.2%)              | 3 ( 0.1%)              |
| ETYNODIOL DIACETATE                          | 2 ( 0.1%)              | 1 (<0.1%)              | 3 ( 0.1%)              |
| GYNECOLOGICAL ANTIINFECTIVES AND ANTISEPTICS | 3 ( 0.2%)              | 0                      | 3 ( 0.1%)              |
| HEPATITIS B VACCINE                          | 2 ( 0.1%)              | 1 (<0.1%)              | 3 ( 0.1%)              |
| HERBAL NOS                                   | 2 ( 0.1%)              | 1 (<0.1%)              | 3 ( 0.1%)              |
| KETOPROFEN                                   | 2 ( 0.1%)              | 1 (<0.1%)              | 3 ( 0.1%)              |
| LIDOCAINE                                    | 1 (<0.1%)              | 2 ( 0.1%)              | 3 ( 0.1%)              |
| MEDROXYPROGESTERONE ACETATE                  | 2 ( 0.1%)              | 1 (<0.1%)              | 3 ( 0.1%)              |
| MELOXICAM                                    | 2 ( 0.1%)              | 1 (<0.1%)              | 3 ( 0.1%)              |
| MOXIFLOXACIN HYDROCHLORIDE                   | 3 ( 0.2%)              | 0                      | 3 ( 0.1%)              |
| NORETHISTERONE ENANTATE                      | 0                      | 3 ( 0.2%)              | 3 ( 0.1%)              |
| PROMETHAZINE                                 | 1 (<0.1%)              | 2 ( 0.1%)              | 3 ( 0.1%)              |
| PSEUDOEPHEDRINE                              | 1 (<0.1%)              | 2 ( 0.1%)              | 3 ( 0.1%)              |
| PSEUDOEPHEDRINE SULFATE                      | 3 ( 0.2%)              | 0                      | 3 ( 0.1%)              |
| RIZATRIPTAN BENZOATE                         | 2 ( 0.1%)              | 1 (<0.1%)              | 3 ( 0.1%)              |
| TERCONAZOLE                                  | 3 ( 0.2%)              | 0                      | 3 ( 0.1%)              |
| ANTIDIARRHOEAL MICROORGANISMS                | 2 ( 0.1%)              | 0                      | 2 (<0.1%)              |
| ANTIFUNGALS                                  | 2 ( 0.1%)              | 0                      | 2 (<0.1%)              |
| BROXYQUINOLINE                               | 1 (<0.1%)              | 1 (<0.1%)              | 2 (<0.1%)              |
| CEFPROZIL                                    | 1 (<0.1%)              | 1 (<0.1%)              | 2 (<0.1%)              |

**Table 14.1.1 / 37: Number of subjects who took at least one prior medication (FAS)**

| Substance                          | LCS12<br>N=1432 (100%) | LCS16<br>N=1452 (100%) | Total<br>N=2884 (100%) |
|------------------------------------|------------------------|------------------------|------------------------|
| CIPROFLOXACIN HYDROCHLORIDE        | 2 ( 0.1%)              | 0                      | 2 (<0.1%)              |
| CITALOPRAM                         | 1 (<0.1%)              | 1 (<0.1%)              | 2 (<0.1%)              |
| CITRIC ACID                        | 1 (<0.1%)              | 1 (<0.1%)              | 2 (<0.1%)              |
| CLAVULANIC ACID                    | 1 (<0.1%)              | 1 (<0.1%)              | 2 (<0.1%)              |
| CLIDINIUM BROMIDE                  | 1 (<0.1%)              | 1 (<0.1%)              | 2 (<0.1%)              |
| COUGH AND COLD PREPARATIONS        | 0                      | 2 ( 0.1%)              | 2 (<0.1%)              |
| DES Loratadine                     | 0                      | 2 ( 0.1%)              | 2 (<0.1%)              |
| DICLOFENAC SODIUM                  | 1 (<0.1%)              | 1 (<0.1%)              | 2 (<0.1%)              |
| DIMENHYDRINATE                     | 2 ( 0.1%)              | 0                      | 2 (<0.1%)              |
| DIOSMIN                            | 0                      | 2 ( 0.1%)              | 2 (<0.1%)              |
| DOXYCYCLINE HYCLATE                | 0                      | 2 ( 0.1%)              | 2 (<0.1%)              |
| EPHEDRINE HYDROCHLORIDE            | 1 (<0.1%)              | 1 (<0.1%)              | 2 (<0.1%)              |
| ERYTHROMYCIN                       | 1 (<0.1%)              | 1 (<0.1%)              | 2 (<0.1%)              |
| ESOMEPRAZOLE MAGNESIUM             | 0                      | 2 ( 0.1%)              | 2 (<0.1%)              |
| FLUCLOXACILLIN SODIUM              | 0                      | 2 ( 0.1%)              | 2 (<0.1%)              |
| GATIFLOXACIN                       | 1 (<0.1%)              | 1 (<0.1%)              | 2 (<0.1%)              |
| GLUCOSAMINE                        | 0                      | 2 ( 0.1%)              | 2 (<0.1%)              |
| HERBAL PREPARATION                 | 0                      | 2 ( 0.1%)              | 2 (<0.1%)              |
| HESPERIDIN                         | 0                      | 2 ( 0.1%)              | 2 (<0.1%)              |
| HYDROXYZINE                        | 0                      | 2 ( 0.1%)              | 2 (<0.1%)              |
| HYOSCINE BUTYLBROMIDE              | 1 (<0.1%)              | 1 (<0.1%)              | 2 (<0.1%)              |
| INOSINE PRANOBEX                   | 2 ( 0.1%)              | 0                      | 2 (<0.1%)              |
| INTRAVAGINAL CONTRACEPTIVES        | 0                      | 2 ( 0.1%)              | 2 (<0.1%)              |
| IRON                               | 2 ( 0.1%)              | 0                      | 2 (<0.1%)              |
| ITRACONAZOLE                       | 2 ( 0.1%)              | 0                      | 2 (<0.1%)              |
| KETOROLAC TROMETHAMINE             | 1 (<0.1%)              | 1 (<0.1%)              | 2 (<0.1%)              |
| LEVOCETIRIZINE DIHYDROCHLORIDE     | 1 (<0.1%)              | 1 (<0.1%)              | 2 (<0.1%)              |
| LORAZEPAM                          | 1 (<0.1%)              | 1 (<0.1%)              | 2 (<0.1%)              |
| METAXALONE                         | 0                      | 2 ( 0.1%)              | 2 (<0.1%)              |
| METHYLERGOMETRINE MALEATE          | 0                      | 2 ( 0.1%)              | 2 (<0.1%)              |
| MIRTAZAPINE                        | 1 (<0.1%)              | 1 (<0.1%)              | 2 (<0.1%)              |
| MOMETASONE FUROATE                 | 2 ( 0.1%)              | 0                      | 2 (<0.1%)              |
| NONOXINOL                          | 2 ( 0.1%)              | 0                      | 2 (<0.1%)              |
| OPIUM DERIVATIVES AND EXPECTORANTS | 0                      | 2 ( 0.1%)              | 2 (<0.1%)              |
| ORLISTAT                           | 2 ( 0.1%)              | 0                      | 2 (<0.1%)              |
| ORPHENADRINE CITRATE               | 0                      | 2 ( 0.1%)              | 2 (<0.1%)              |
| OXYCODONE HYDROCHLORIDE            | 0                      | 2 ( 0.1%)              | 2 (<0.1%)              |
| PENTOXIFYLLINE CITRATE             | 1 (<0.1%)              | 1 (<0.1%)              | 2 (<0.1%)              |
| PHENOXYMETHYLPENICILLIN            | 0                      | 2 ( 0.1%)              | 2 (<0.1%)              |
| PHENYLPROPANOLAMINE HYDROCHLORIDE  | 0                      | 2 ( 0.1%)              | 2 (<0.1%)              |
| PREDNISON                          | 2 ( 0.1%)              | 0                      | 2 (<0.1%)              |
| RIZATRIPTAN                        | 2 ( 0.1%)              | 0                      | 2 (<0.1%)              |
| SALICYLAMIDE                       | 2 ( 0.1%)              | 0                      | 2 (<0.1%)              |
| SODIUM BICARBONATE                 | 1 (<0.1%)              | 1 (<0.1%)              | 2 (<0.1%)              |
| TINIDAZOLE                         | 0                      | 2 ( 0.1%)              | 2 (<0.1%)              |

**Table 14.1.1 / 37: Number of subjects who took at least one prior medication (FAS)**

| Substance                                     | LCS12<br>N=1432 (100%) | LCS16<br>N=1452 (100%) | Total<br>N=2884 (100%) |
|-----------------------------------------------|------------------------|------------------------|------------------------|
| TOLFENAMIC ACID                               | 0                      | 2 ( 0.1%)              | 2 (<0.1%)              |
| TOPIRAMATE                                    | 2 ( 0.1%)              | 0                      | 2 (<0.1%)              |
| TRAMADOL                                      | 0                      | 2 ( 0.1%)              | 2 (<0.1%)              |
| TRIAMCINOLONE ACETONIDE                       | 2 ( 0.1%)              | 0                      | 2 (<0.1%)              |
| VALACICLOVIR HYDROCHLORIDE                    | 1 (<0.1%)              | 1 (<0.1%)              | 2 (<0.1%)              |
| VARENICLINE TARTRATE                          | 0                      | 2 ( 0.1%)              | 2 (<0.1%)              |
| VENLAFAXINE HYDROCHLORIDE                     | 0                      | 2 ( 0.1%)              | 2 (<0.1%)              |
| ACETYLCYSTEINE                                | 0                      | 1 (<0.1%)              | 1 (<0.1%)              |
| ALLIUM SATIVUM                                | 1 (<0.1%)              | 0                      | 1 (<0.1%)              |
| AMBROXOL HYDROCHLORIDE                        | 1 (<0.1%)              | 0                      | 1 (<0.1%)              |
| AMCINONIDE                                    | 1 (<0.1%)              | 0                      | 1 (<0.1%)              |
| AMITRIPTYLINE HYDROCHLORIDE                   | 1 (<0.1%)              | 0                      | 1 (<0.1%)              |
| AMMONIUM CARBONATE                            | 0                      | 1 (<0.1%)              | 1 (<0.1%)              |
| ANAESTHETICS                                  | 0                      | 1 (<0.1%)              | 1 (<0.1%)              |
| ANAESTHETICS, LOCAL                           | 0                      | 1 (<0.1%)              | 1 (<0.1%)              |
| ANTIINFECTIVES/ANTISEPT..EXCL.COMB WITH CORTI | 0                      | 1 (<0.1%)              | 1 (<0.1%)              |
| ANTISPASMODICS IN COMBINATION WITH ANALGESICS | 0                      | 1 (<0.1%)              | 1 (<0.1%)              |
| BACITRACIN                                    | 1 (<0.1%)              | 0                      | 1 (<0.1%)              |
| BACITRACIN ZINC                               | 1 (<0.1%)              | 0                      | 1 (<0.1%)              |
| BACTERIA NOS                                  | 1 (<0.1%)              | 0                      | 1 (<0.1%)              |
| BAMIPINE                                      | 0                      | 1 (<0.1%)              | 1 (<0.1%)              |
| BENZALKONIUM CHLORIDE                         | 1 (<0.1%)              | 0                      | 1 (<0.1%)              |
| BENZYPENICILLIN PROCAINE                      | 0                      | 1 (<0.1%)              | 1 (<0.1%)              |
| BETAMETHASONE VALERATE                        | 0                      | 1 (<0.1%)              | 1 (<0.1%)              |
| BIFIDOBACTERIUM BIFIDUM                       | 1 (<0.1%)              | 0                      | 1 (<0.1%)              |
| BISOPROLOL                                    | 1 (<0.1%)              | 0                      | 1 (<0.1%)              |
| BOTULINUM TOXIN TYPE A                        | 0                      | 1 (<0.1%)              | 1 (<0.1%)              |
| BROMAZEPAM                                    | 1 (<0.1%)              | 0                      | 1 (<0.1%)              |
| BROMOCRIPTINE MESILATE                        | 1 (<0.1%)              | 0                      | 1 (<0.1%)              |
| BUTALBITAL                                    | 1 (<0.1%)              | 0                      | 1 (<0.1%)              |
| BUTAMIRATE CITRATE                            | 1 (<0.1%)              | 0                      | 1 (<0.1%)              |
| BUTOCONAZOLE NITRATE                          | 0                      | 1 (<0.1%)              | 1 (<0.1%)              |
| CABERGOLINE                                   | 1 (<0.1%)              | 0                      | 1 (<0.1%)              |
| CALCIUM CARBONATE                             | 1 (<0.1%)              | 0                      | 1 (<0.1%)              |
| CAMPHOR                                       | 0                      | 1 (<0.1%)              | 1 (<0.1%)              |
| CARBAMAZEPINE                                 | 0                      | 1 (<0.1%)              | 1 (<0.1%)              |
| CARBASALATE CALCIUM                           | 0                      | 1 (<0.1%)              | 1 (<0.1%)              |
| CARBOCISTEINE                                 | 1 (<0.1%)              | 0                      | 1 (<0.1%)              |
| CARISOPRODOL                                  | 0                      | 1 (<0.1%)              | 1 (<0.1%)              |
| CEFADROXIL                                    | 0                      | 1 (<0.1%)              | 1 (<0.1%)              |
| CEFDINIR                                      | 1 (<0.1%)              | 0                      | 1 (<0.1%)              |
| CEFIXIME                                      | 1 (<0.1%)              | 0                      | 1 (<0.1%)              |
| CEFTRIAXONE                                   | 0                      | 1 (<0.1%)              | 1 (<0.1%)              |
| CEFUROXIME                                    | 1 (<0.1%)              | 0                      | 1 (<0.1%)              |
| CEFUROXIME SODIUM                             | 1 (<0.1%)              | 0                      | 1 (<0.1%)              |

**Table 14.1.1 / 37: Number of subjects who took at least one prior medication (FAS)**

| Substance                         | LCS12<br>N=1432 (100%) | LCS16<br>N=1452 (100%) | Total<br>N=2884 (100%) |
|-----------------------------------|------------------------|------------------------|------------------------|
| CEPHAELIS SPP. FLUID EXTRACT      | 0                      | 1 (<0.1%)              | 1 (<0.1%)              |
| CHLORAMPHENICOL                   | 0                      | 1 (<0.1%)              | 1 (<0.1%)              |
| CHLORDIAZEPOXIDE                  | 1 (<0.1%)              | 0                      | 1 (<0.1%)              |
| CHLORDIAZEPOXIDE HYDROCHLORIDE    | 0                      | 1 (<0.1%)              | 1 (<0.1%)              |
| CHLOROFORM                        | 0                      | 1 (<0.1%)              | 1 (<0.1%)              |
| CHLOROQUINE PHOSPHATE             | 1 (<0.1%)              | 0                      | 1 (<0.1%)              |
| CHONDROITIN                       | 0                      | 1 (<0.1%)              | 1 (<0.1%)              |
| CITALOPRAM HYDROBROMIDE           | 1 (<0.1%)              | 0                      | 1 (<0.1%)              |
| CLONIXIN                          | 1 (<0.1%)              | 0                      | 1 (<0.1%)              |
| COMBINATIONS OF ANTIBACTERIALS    | 1 (<0.1%)              | 0                      | 1 (<0.1%)              |
| CORTICOSTEROID NOS                | 1 (<0.1%)              | 0                      | 1 (<0.1%)              |
| CORTISONE                         | 0                      | 1 (<0.1%)              | 1 (<0.1%)              |
| CYCLIZINE HYDROCHLORIDE           | 1 (<0.1%)              | 0                      | 1 (<0.1%)              |
| CYCLOBENZAPRINE                   | 1 (<0.1%)              | 0                      | 1 (<0.1%)              |
| DARIFENACIN HYDROBROMIDE          | 1 (<0.1%)              | 0                      | 1 (<0.1%)              |
| DEXAMETHASONE                     | 1 (<0.1%)              | 0                      | 1 (<0.1%)              |
| DICLOFENAC POTASSIUM              | 1 (<0.1%)              | 0                      | 1 (<0.1%)              |
| DICLOFENAMIDE                     | 1 (<0.1%)              | 0                      | 1 (<0.1%)              |
| DIMETICONE                        | 1 (<0.1%)              | 0                      | 1 (<0.1%)              |
| DIMETINDENE MALEATE               | 1 (<0.1%)              | 0                      | 1 (<0.1%)              |
| DIPHENHYDRAMINE                   | 0                      | 1 (<0.1%)              | 1 (<0.1%)              |
| DIPYRIDAMOLE                      | 0                      | 1 (<0.1%)              | 1 (<0.1%)              |
| DOCOSAHEXANOIC ACID               | 1 (<0.1%)              | 0                      | 1 (<0.1%)              |
| DOCUSATE SODIUM                   | 0                      | 1 (<0.1%)              | 1 (<0.1%)              |
| DOMPERIDONE                       | 1 (<0.1%)              | 0                      | 1 (<0.1%)              |
| DOXYCYCLINE HYDROCHLORIDE         | 1 (<0.1%)              | 0                      | 1 (<0.1%)              |
| DRUGS USED IN NICOTINE DEPENDENCE | 1 (<0.1%)              | 0                      | 1 (<0.1%)              |
| ECHINACEA PURPUREA                | 1 (<0.1%)              | 0                      | 1 (<0.1%)              |
| ECONAZOLE NITRATE                 | 1 (<0.1%)              | 0                      | 1 (<0.1%)              |
| EICOSAPENTAENOIC ACID             | 1 (<0.1%)              | 0                      | 1 (<0.1%)              |
| ENOXAPARIN SODIUM                 | 1 (<0.1%)              | 0                      | 1 (<0.1%)              |
| ENTEROCOCCUS FAECIUM              | 1 (<0.1%)              | 0                      | 1 (<0.1%)              |
| ESCITALOPRAM                      | 0                      | 1 (<0.1%)              | 1 (<0.1%)              |
| ESCITALOPRAM OXALATE              | 1 (<0.1%)              | 0                      | 1 (<0.1%)              |
| ESTRADIOL                         | 0                      | 1 (<0.1%)              | 1 (<0.1%)              |
| ESZOPICLONE                       | 1 (<0.1%)              | 0                      | 1 (<0.1%)              |
| ETHYLMORPHINE HYDROCHLORIDE       | 1 (<0.1%)              | 0                      | 1 (<0.1%)              |
| ETORICOXIB                        | 0                      | 1 (<0.1%)              | 1 (<0.1%)              |
| FAMOTIDINE                        | 1 (<0.1%)              | 0                      | 1 (<0.1%)              |
| FELYPRESSIN                       | 0                      | 1 (<0.1%)              | 1 (<0.1%)              |
| FENTICONAZOLE NITRATE             | 0                      | 1 (<0.1%)              | 1 (<0.1%)              |
| FERRIC SODIUM GLUCONATE COMPLEX   | 1 (<0.1%)              | 0                      | 1 (<0.1%)              |
| FEXOFENADINE                      | 1 (<0.1%)              | 0                      | 1 (<0.1%)              |
| FLUNARIZINE                       | 1 (<0.1%)              | 0                      | 1 (<0.1%)              |
| FLUVOXAMINE MALEATE               | 1 (<0.1%)              | 0                      | 1 (<0.1%)              |



**Table 14.1.1 / 37: Number of subjects who took at least one prior medication (FAS)**

| Substance                                     | LCS12<br>N=1432 (100%) | LCS16<br>N=1452 (100%) | Total<br>N=2884 (100%) |
|-----------------------------------------------|------------------------|------------------------|------------------------|
| FORMOTEROL FUMARATE                           | 1 (<0.1%)              | 0                      | 1 (<0.1%)              |
| GELATIN                                       | 1 (<0.1%)              | 0                      | 1 (<0.1%)              |
| GENTAMICIN                                    | 0                      | 1 (<0.1%)              | 1 (<0.1%)              |
| GRAMICIDIN                                    | 1 (<0.1%)              | 0                      | 1 (<0.1%)              |
| GUAREA GUIDONIA                               | 1 (<0.1%)              | 0                      | 1 (<0.1%)              |
| GYNAECOLOGICAL ANTIINFECTIVES AND ANTISEPTICS | 0                      | 1 (<0.1%)              | 1 (<0.1%)              |
| HAEMOPHILUS INFLUENZAE                        | 1 (<0.1%)              | 0                      | 1 (<0.1%)              |
| HEDERA HELIX                                  | 0                      | 1 (<0.1%)              | 1 (<0.1%)              |
| HOMATROPINE METHYLBROMIDE                     | 1 (<0.1%)              | 0                      | 1 (<0.1%)              |
| HOMEOPATIC PREPARATION                        | 1 (<0.1%)              | 0                      | 1 (<0.1%)              |
| HOMEOPATICS NOS                               | 1 (<0.1%)              | 0                      | 1 (<0.1%)              |
| HYDROCHLOROTHIAZIDE                           | 0                      | 1 (<0.1%)              | 1 (<0.1%)              |
| HYDROMORPHONE HYDROCHLORIDE                   | 0                      | 1 (<0.1%)              | 1 (<0.1%)              |
| HYOSCYAMINE SULFATE                           | 0                      | 1 (<0.1%)              | 1 (<0.1%)              |
| IMIDAZOLE DERIVATIVES                         | 1 (<0.1%)              | 0                      | 1 (<0.1%)              |
| IMIQUIMOD                                     | 1 (<0.1%)              | 0                      | 1 (<0.1%)              |
| INFLUENZA VACCINE                             | 0                      | 1 (<0.1%)              | 1 (<0.1%)              |
| IRON IN OTHER COMBINATIONS                    | 0                      | 1 (<0.1%)              | 1 (<0.1%)              |
| ISOTRETINOIN                                  | 1 (<0.1%)              | 0                      | 1 (<0.1%)              |
| KETOCONAZOLE                                  | 0                      | 1 (<0.1%)              | 1 (<0.1%)              |
| KETOROLAC                                     | 0                      | 1 (<0.1%)              | 1 (<0.1%)              |
| KLEBSIELLA PNEUMONIAE                         | 1 (<0.1%)              | 0                      | 1 (<0.1%)              |
| LANSOPRAZOLE                                  | 0                      | 1 (<0.1%)              | 1 (<0.1%)              |
| LEVOTHYROXINE SODIUM                          | 0                      | 1 (<0.1%)              | 1 (<0.1%)              |
| LYNESTRENOL                                   | 0                      | 1 (<0.1%)              | 1 (<0.1%)              |
| MACROCYSTIS PYRIFERA                          | 1 (<0.1%)              | 0                      | 1 (<0.1%)              |
| MACROGOL                                      | 0                      | 1 (<0.1%)              | 1 (<0.1%)              |
| MAGNESIUM CARBONATE                           | 1 (<0.1%)              | 0                      | 1 (<0.1%)              |
| MECLOZINE                                     | 1 (<0.1%)              | 0                      | 1 (<0.1%)              |
| MENINGOCOCCAL VACCINES                        | 1 (<0.1%)              | 0                      | 1 (<0.1%)              |
| MENTHOL                                       | 0                      | 1 (<0.1%)              | 1 (<0.1%)              |
| MESALAZINE                                    | 1 (<0.1%)              | 0                      | 1 (<0.1%)              |
| METFORMIN                                     | 0                      | 1 (<0.1%)              | 1 (<0.1%)              |
| METHENAMINE                                   | 0                      | 1 (<0.1%)              | 1 (<0.1%)              |
| METHYLCELLULOSE                               | 1 (<0.1%)              | 0                      | 1 (<0.1%)              |
| METHYLPREDNISOLONE                            | 0                      | 1 (<0.1%)              | 1 (<0.1%)              |
| METHYLTHIONINIUM CHLORIDE                     | 0                      | 1 (<0.1%)              | 1 (<0.1%)              |
| METOCLOPRAMIDE                                | 0                      | 1 (<0.1%)              | 1 (<0.1%)              |
| METOCLOPRAMIDE HYDROCHLORIDE                  | 1 (<0.1%)              | 0                      | 1 (<0.1%)              |
| MICONAZOLE                                    | 0                      | 1 (<0.1%)              | 1 (<0.1%)              |
| MIDAZOLAM HYDROCHLORIDE                       | 0                      | 1 (<0.1%)              | 1 (<0.1%)              |
| MINOCYCLINE                                   | 0                      | 1 (<0.1%)              | 1 (<0.1%)              |
| NASAL PREPARATIONS                            | 1 (<0.1%)              | 0                      | 1 (<0.1%)              |
| NATAMYCIN                                     | 1 (<0.1%)              | 0                      | 1 (<0.1%)              |
| NEISSERIA CATARRHALIS                         | 1 (<0.1%)              | 0                      | 1 (<0.1%)              |

**Table 14.1.1 / 37: Number of subjects who took at least one prior medication (FAS)**

| Substance                      | LCS12<br>N=1432 (100%) | LCS16<br>N=1452 (100%) | Total<br>N=2884 (100%) |
|--------------------------------|------------------------|------------------------|------------------------|
| NOMEGESTROL ACETATE            | 0                      | 1 (<0.1%)              | 1 (<0.1%)              |
| NORFLOXACIN                    | 1 (<0.1%)              | 0                      | 1 (<0.1%)              |
| NORMETHADONE HYDROCHLORIDE     | 1 (<0.1%)              | 0                      | 1 (<0.1%)              |
| ONDANSETRON                    | 0                      | 1 (<0.1%)              | 1 (<0.1%)              |
| OXILOFRINE HYDROCHLORIDE       | 1 (<0.1%)              | 0                      | 1 (<0.1%)              |
| PANAX GINSENG                  | 1 (<0.1%)              | 0                      | 1 (<0.1%)              |
| PANTOPRAZOLE SODIUM            | 0                      | 1 (<0.1%)              | 1 (<0.1%)              |
| PARGEVERINE HYDROCHLORIDE      | 0                      | 1 (<0.1%)              | 1 (<0.1%)              |
| PENTOSAN POLYSULFATE SODIUM    | 0                      | 1 (<0.1%)              | 1 (<0.1%)              |
| PHENIRAMINE MALEATE            | 0                      | 1 (<0.1%)              | 1 (<0.1%)              |
| PHTERMINE                      | 1 (<0.1%)              | 0                      | 1 (<0.1%)              |
| PHENYL SALICYLATE              | 0                      | 1 (<0.1%)              | 1 (<0.1%)              |
| PHENYLPROPANOLAMINE            | 0                      | 1 (<0.1%)              | 1 (<0.1%)              |
| PHOSPHORIC ACID SODIUM         | 0                      | 1 (<0.1%)              | 1 (<0.1%)              |
| PIROXICAM BETADEX              | 0                      | 1 (<0.1%)              | 1 (<0.1%)              |
| PODOPHYLLOTOXIN                | 0                      | 1 (<0.1%)              | 1 (<0.1%)              |
| POLICRESULEN                   | 1 (<0.1%)              | 0                      | 1 (<0.1%)              |
| POLIOMYELITIS VACCINE          | 0                      | 1 (<0.1%)              | 1 (<0.1%)              |
| POLYACRYLIC ACID               | 1 (<0.1%)              | 0                      | 1 (<0.1%)              |
| POLYSORBATE 20                 | 0                      | 1 (<0.1%)              | 1 (<0.1%)              |
| POTASSIUM BICARBONATE          | 0                      | 1 (<0.1%)              | 1 (<0.1%)              |
| POTASSIUM CHLORIDE             | 0                      | 1 (<0.1%)              | 1 (<0.1%)              |
| PREDNISOLONE                   | 0                      | 1 (<0.1%)              | 1 (<0.1%)              |
| PREDNISOLONE ACETATE           | 1 (<0.1%)              | 0                      | 1 (<0.1%)              |
| PREDNISOLONE SODIUM PHOSPHATE  | 1 (<0.1%)              | 0                      | 1 (<0.1%)              |
| PRIDINOL MESILATE              | 0                      | 1 (<0.1%)              | 1 (<0.1%)              |
| PRILOCAINE                     | 0                      | 1 (<0.1%)              | 1 (<0.1%)              |
| PROCHLORPERAZINE EDISYLATE     | 0                      | 1 (<0.1%)              | 1 (<0.1%)              |
| PROMETHAZINE HYDROCHLORIDE     | 0                      | 1 (<0.1%)              | 1 (<0.1%)              |
| PROPYPHENAZONE                 | 0                      | 1 (<0.1%)              | 1 (<0.1%)              |
| PSYLLIUM HYDROPHILIC MUCILLOID | 1 (<0.1%)              | 0                      | 1 (<0.1%)              |
| PYRIDOXINE HYDROCHLORIDE       | 0                      | 1 (<0.1%)              | 1 (<0.1%)              |
| RAMIPRIL                       | 0                      | 1 (<0.1%)              | 1 (<0.1%)              |
| ROXITHROMYCIN                  | 1 (<0.1%)              | 0                      | 1 (<0.1%)              |
| SALBUTAMOL                     | 1 (<0.1%)              | 0                      | 1 (<0.1%)              |
| SIBUTRAMINE                    | 1 (<0.1%)              | 0                      | 1 (<0.1%)              |
| SIBUTRAMINE HYDROCHLORIDE      | 1 (<0.1%)              | 0                      | 1 (<0.1%)              |
| SILYBUM MARIANUM               | 1 (<0.1%)              | 0                      | 1 (<0.1%)              |
| SODIUM CHLORIDE                | 0                      | 1 (<0.1%)              | 1 (<0.1%)              |
| SODIUM CITRATE                 | 0                      | 1 (<0.1%)              | 1 (<0.1%)              |
| SPIRONOLACTONE                 | 1 (<0.1%)              | 0                      | 1 (<0.1%)              |
| STREPTOCOCCUS PNEUMONIAE       | 1 (<0.1%)              | 0                      | 1 (<0.1%)              |
| STREPTOCOCCUS PYOGENES         | 1 (<0.1%)              | 0                      | 1 (<0.1%)              |
| STREPTOCOCCUS VIRIDANS         | 1 (<0.1%)              | 0                      | 1 (<0.1%)              |
| SULFANILAMIDE                  | 0                      | 1 (<0.1%)              | 1 (<0.1%)              |

**Table 14.1.1 / 37: Number of subjects who took at least one prior medication (FAS)**

| Substance                    | LCS12<br>N=1432 (100%) | LCS16<br>N=1452 (100%) | Total<br>N=2884 (100%) |
|------------------------------|------------------------|------------------------|------------------------|
| SULFOGAIACOL                 | 0                      | 1 (<0.1%)              | 1 (<0.1%)              |
| TEMAZEPAM                    | 0                      | 1 (<0.1%)              | 1 (<0.1%)              |
| TERBUTALINE SULFATE          | 1 (<0.1%)              | 0                      | 1 (<0.1%)              |
| TETANUS VACCINE              | 0                      | 1 (<0.1%)              | 1 (<0.1%)              |
| TETRACYCLINE HYDROCHLORIDE   | 1 (<0.1%)              | 0                      | 1 (<0.1%)              |
| TETRYZOLINE HYDROCHLORIDE    | 1 (<0.1%)              | 0                      | 1 (<0.1%)              |
| TRAZODONE                    | 0                      | 1 (<0.1%)              | 1 (<0.1%)              |
| TRIAMTERENE                  | 0                      | 1 (<0.1%)              | 1 (<0.1%)              |
| TRIPROLIDINE HYDROCHLORIDE   | 1 (<0.1%)              | 0                      | 1 (<0.1%)              |
| TYPHOID VACCINE              | 0                      | 1 (<0.1%)              | 1 (<0.1%)              |
| VENLAFAXINE                  | 1 (<0.1%)              | 0                      | 1 (<0.1%)              |
| VITAMINS                     | 0                      | 1 (<0.1%)              | 1 (<0.1%)              |
| VITAMINS WITH MINERALS       | 0                      | 1 (<0.1%)              | 1 (<0.1%)              |
| XYLOMETAZOLINE HYDROCHLORIDE | 0                      | 1 (<0.1%)              | 1 (<0.1%)              |
| ZINC                         | 0                      | 1 (<0.1%)              | 1 (<0.1%)              |
| ZINC OXIDE                   | 1 (<0.1%)              | 0                      | 1 (<0.1%)              |
| ZOLMITRIPTAN                 | 1 (<0.1%)              | 0                      | 1 (<0.1%)              |
| ZOPICLONE                    | 0                      | 1 (<0.1%)              | 1 (<0.1%)              |

Note: Multiple substances per drug are possible. Therefore, the same drug may be counted for more than one substance for the same subject

Note: All documented medications that ended before start of treatment are included in this table

Global Biostatistics: /by-sasp/patdb/projects/de04209/310442/stat/prod\_interim03/pgms/t-cm.sas epkll 07OCT2011 10:50

End of table

**Table 14.1.1 / 38: Number of subjects who took at least one concomitant medication (FAS)**

| Substance                                                       | LCS12<br>N=1432 (100%) | LCS16<br>N=1452 (100%) | Total<br>N=2884 (100%) |
|-----------------------------------------------------------------|------------------------|------------------------|------------------------|
| Number of subjects (%) with at least one concomitant medication | 1191 ( 83.2%)          | 1215 ( 83.7%)          | 2406 ( 83.4%)          |
| IBUPROFEN                                                       | 572 ( 39.9%)           | 598 ( 41.2%)           | 1170 ( 40.6%)          |
| PARACETAMOL                                                     | 442 ( 30.9%)           | 467 ( 32.2%)           | 909 ( 31.5%)           |
| METRONIDAZOLE                                                   | 150 ( 10.5%)           | 174 ( 12.0%)           | 324 ( 11.2%)           |
| FLUCONAZOLE                                                     | 138 ( 9.6%)            | 151 ( 10.4%)           | 289 ( 10.0%)           |
| AMOXICILLIN                                                     | 94 ( 6.6%)             | 99 ( 6.8%)             | 193 ( 6.7%)            |
| AZITHROMYCIN                                                    | 89 ( 6.2%)             | 93 ( 6.4%)             | 182 ( 6.3%)            |
| LIDOCAINE                                                       | 81 ( 5.7%)             | 91 ( 6.3%)             | 172 ( 6.0%)            |
| CIPROFLOXACIN                                                   | 94 ( 6.6%)             | 77 ( 5.3%)             | 171 ( 5.9%)            |
| VITAMINS NOS                                                    | 82 ( 5.7%)             | 87 ( 6.0%)             | 169 ( 5.9%)            |
| NAPROXEN                                                        | 80 ( 5.6%)             | 88 ( 6.1%)             | 168 ( 5.8%)            |
| PSEUDOEPHEDRINE HYDROCHLORIDE                                   | 77 ( 5.4%)             | 84 ( 5.8%)             | 161 ( 5.6%)            |
| ETHINYLESTRADIOL                                                | 78 ( 5.4%)             | 81 ( 5.6%)             | 159 ( 5.5%)            |
| CAFFEINE                                                        | 80 ( 5.6%)             | 74 ( 5.1%)             | 154 ( 5.3%)            |
| CEFALEXIN                                                       | 78 ( 5.4%)             | 75 ( 5.2%)             | 153 ( 5.3%)            |
| DICLOFENAC                                                      | 70 ( 4.9%)             | 79 ( 5.4%)             | 149 ( 5.2%)            |
| NAPROXEN SODIUM                                                 | 78 ( 5.4%)             | 69 ( 4.8%)             | 147 ( 5.1%)            |
| ACETYLSALICYLIC ACID                                            | 72 ( 5.0%)             | 64 ( 4.4%)             | 136 ( 4.7%)            |
| ASCORBIC ACID                                                   | 76 ( 5.3%)             | 51 ( 3.5%)             | 127 ( 4.4%)            |
| CLOTRIMAZOLE                                                    | 65 ( 4.5%)             | 59 ( 4.1%)             | 124 ( 4.3%)            |
| TRIMETHOPRIM                                                    | 57 ( 4.0%)             | 61 ( 4.2%)             | 118 ( 4.1%)            |
| MICONAZOLE NITRATE                                              | 52 ( 3.6%)             | 62 ( 4.3%)             | 114 ( 4.0%)            |
| CODEINE PHOSPHATE                                               | 47 ( 3.3%)             | 57 ( 3.9%)             | 104 ( 3.6%)            |
| SALBUTAMOL                                                      | 52 ( 3.6%)             | 52 ( 3.6%)             | 104 ( 3.6%)            |
| CETIRIZINE HYDROCHLORIDE                                        | 47 ( 3.3%)             | 55 ( 3.8%)             | 102 ( 3.5%)            |
| LORATADINE                                                      | 54 ( 3.8%)             | 47 ( 3.2%)             | 101 ( 3.5%)            |
| NITROFURANTOIN                                                  | 63 ( 4.4%)             | 38 ( 2.6%)             | 101 ( 3.5%)            |
| DOXYCYCLINE                                                     | 48 ( 3.4%)             | 52 ( 3.6%)             | 100 ( 3.5%)            |
| AMOXICILLIN TRIHYDRATE                                          | 47 ( 3.3%)             | 49 ( 3.4%)             | 96 ( 3.3%)             |
| LIDOCAINE HYDROCHLORIDE                                         | 48 ( 3.4%)             | 48 ( 3.3%)             | 96 ( 3.3%)             |
| DEXTROMETHORPHAN HYDROBROMIDE                                   | 51 ( 3.6%)             | 44 ( 3.0%)             | 95 ( 3.3%)             |
| CLAVULANATE POTASSIUM                                           | 43 ( 3.0%)             | 44 ( 3.0%)             | 87 ( 3.0%)             |
| HYDROCODONE BITARTRATE                                          | 40 ( 2.8%)             | 47 ( 3.2%)             | 87 ( 3.0%)             |
| DIPHENHYDRAMINE HYDROCHLORIDE                                   | 35 ( 2.4%)             | 44 ( 3.0%)             | 79 ( 2.7%)             |
| PHENOXYMETHYLPENICILLIN POTASSIUM                               | 43 ( 3.0%)             | 35 ( 2.4%)             | 78 ( 2.7%)             |
| LEVOTHYROXINE SODIUM                                            | 33 ( 2.3%)             | 39 ( 2.7%)             | 72 ( 2.5%)             |
| FLUTICASONE PROPIONATE                                          | 36 ( 2.5%)             | 31 ( 2.1%)             | 67 ( 2.3%)             |
| GUAIFENESIN                                                     | 36 ( 2.5%)             | 28 ( 1.9%)             | 64 ( 2.2%)             |
| FOLIC ACID                                                      | 29 ( 2.0%)             | 34 ( 2.3%)             | 63 ( 2.2%)             |
| OXYCODONE HYDROCHLORIDE                                         | 26 ( 1.8%)             | 35 ( 2.4%)             | 61 ( 2.1%)             |
| SULFAMETHOXAZOLE                                                | 28 ( 2.0%)             | 33 ( 2.3%)             | 61 ( 2.1%)             |
| CLINDAMYCIN PHOSPHATE                                           | 28 ( 2.0%)             | 32 ( 2.2%)             | 60 ( 2.1%)             |
| PIVMECILLINAM                                                   | 39 ( 2.7%)             | 21 ( 1.4%)             | 60 ( 2.1%)             |

**Table 14.1.1 / 38: Number of subjects who took at least one concomitant medication (FAS)**

| Substance                  | LCS12<br>N=1432 (100%) | LCS16<br>N=1452 (100%) | Total<br>N=2884 (100%) |
|----------------------------|------------------------|------------------------|------------------------|
| MOMETASONE FUROATE         | 32 ( 2.2%)             | 27 ( 1.9%)             | 59 ( 2.0%)             |
| CHLORPHENAMINE MALEATE     | 31 ( 2.2%)             | 27 ( 1.9%)             | 58 ( 2.0%)             |
| CITALOPRAM HYDROBROMIDE    | 34 ( 2.4%)             | 22 ( 1.5%)             | 56 ( 1.9%)             |
| DICLOFENAC SODIUM          | 27 ( 1.9%)             | 26 ( 1.8%)             | 53 ( 1.8%)             |
| INFLUENZA VACCINE          | 22 ( 1.5%)             | 31 ( 2.1%)             | 53 ( 1.8%)             |
| HYDROCORTISONE             | 28 ( 2.0%)             | 24 ( 1.7%)             | 52 ( 1.8%)             |
| ONDANSETRON                | 28 ( 2.0%)             | 24 ( 1.7%)             | 52 ( 1.8%)             |
| NYSTATIN                   | 25 ( 1.7%)             | 25 ( 1.7%)             | 50 ( 1.7%)             |
| ESCITALOPRAM OXALATE       | 29 ( 2.0%)             | 20 ( 1.4%)             | 49 ( 1.7%)             |
| IMIDAZOLE DERIVATIVES      | 18 ( 1.3%)             | 31 ( 2.1%)             | 49 ( 1.7%)             |
| DOXYLAMINE SUCCINATE       | 23 ( 1.6%)             | 25 ( 1.7%)             | 48 ( 1.7%)             |
| SERTRALINE                 | 21 ( 1.5%)             | 27 ( 1.9%)             | 48 ( 1.7%)             |
| ACICLOVIR                  | 24 ( 1.7%)             | 23 ( 1.6%)             | 47 ( 1.6%)             |
| BUDESONIDE                 | 25 ( 1.7%)             | 22 ( 1.5%)             | 47 ( 1.6%)             |
| MINERALS NOS               | 24 ( 1.7%)             | 23 ( 1.6%)             | 47 ( 1.6%)             |
| ACRIVASTINE                | 20 ( 1.4%)             | 26 ( 1.8%)             | 46 ( 1.6%)             |
| RETINOL                    | 31 ( 2.2%)             | 15 ( 1.0%)             | 46 ( 1.6%)             |
| CLARITHROMYCIN             | 24 ( 1.7%)             | 21 ( 1.4%)             | 45 ( 1.6%)             |
| CLINDAMYCIN                | 21 ( 1.5%)             | 24 ( 1.7%)             | 45 ( 1.6%)             |
| CLINDAMYCIN HYDROCHLORIDE  | 24 ( 1.7%)             | 21 ( 1.4%)             | 45 ( 1.6%)             |
| KETOPROFEN                 | 18 ( 1.3%)             | 27 ( 1.9%)             | 45 ( 1.6%)             |
| MISOPROSTOL                | 22 ( 1.5%)             | 23 ( 1.6%)             | 45 ( 1.6%)             |
| HYDROCODONE                | 21 ( 1.5%)             | 23 ( 1.6%)             | 44 ( 1.5%)             |
| OMEPRAZOLE                 | 23 ( 1.6%)             | 21 ( 1.4%)             | 44 ( 1.5%)             |
| ALPRAZOLAM                 | 19 ( 1.3%)             | 24 ( 1.7%)             | 43 ( 1.5%)             |
| PREDNISONE                 | 20 ( 1.4%)             | 23 ( 1.6%)             | 43 ( 1.5%)             |
| ETHANOL                    | 19 ( 1.3%)             | 23 ( 1.6%)             | 42 ( 1.5%)             |
| METOCLOPRAMIDE             | 23 ( 1.6%)             | 19 ( 1.3%)             | 42 ( 1.5%)             |
| DOXYCYCLINE HYDROCHLORIDE  | 18 ( 1.3%)             | 23 ( 1.6%)             | 41 ( 1.4%)             |
| TRIAMCINOLONE ACETONIDE    | 23 ( 1.6%)             | 18 ( 1.2%)             | 41 ( 1.4%)             |
| DEXAMETHASONE              | 24 ( 1.7%)             | 16 ( 1.1%)             | 40 ( 1.4%)             |
| DIAZEPAM                   | 19 ( 1.3%)             | 21 ( 1.4%)             | 40 ( 1.4%)             |
| LEVOFLOXACIN               | 24 ( 1.7%)             | 16 ( 1.1%)             | 40 ( 1.4%)             |
| IRON                       | 15 ( 1.0%)             | 24 ( 1.7%)             | 39 ( 1.4%)             |
| AMOXICILLIN SODIUM         | 26 ( 1.8%)             | 12 ( 0.8%)             | 38 ( 1.3%)             |
| EPHEDRINE SULFATE          | 18 ( 1.3%)             | 20 ( 1.4%)             | 38 ( 1.3%)             |
| VALACICLOVIR HYDROCHLORIDE | 21 ( 1.5%)             | 17 ( 1.2%)             | 38 ( 1.3%)             |
| KETOROLAC TROMETHAMINE     | 20 ( 1.4%)             | 17 ( 1.2%)             | 37 ( 1.3%)             |
| TERCONAZOLE                | 18 ( 1.3%)             | 19 ( 1.3%)             | 37 ( 1.3%)             |
| COLECALCIFEROL             | 14 ( 1.0%)             | 22 ( 1.5%)             | 36 ( 1.2%)             |
| PROMETHAZINE               | 16 ( 1.1%)             | 20 ( 1.4%)             | 36 ( 1.2%)             |
| DROSPIRENONE               | 18 ( 1.3%)             | 17 ( 1.2%)             | 35 ( 1.2%)             |
| CYANOCOBALAMIN             | 15 ( 1.0%)             | 19 ( 1.3%)             | 34 ( 1.2%)             |
| ESOMEPRAZOLE MAGNESIUM     | 13 ( 0.9%)             | 21 ( 1.4%)             | 34 ( 1.2%)             |
| LEVONORGESTREL             | 21 ( 1.5%)             | 13 ( 0.9%)             | 34 ( 1.2%)             |

**Table 14.1.1 / 38: Number of subjects who took at least one concomitant medication (FAS)**

| Substance                            | LCS12<br>N=1432 (100%) | LCS16<br>N=1452 (100%) | Total<br>N=2884 (100%) |
|--------------------------------------|------------------------|------------------------|------------------------|
| SODIUM CHLORIDE                      | 16 ( 1.1%)             | 18 ( 1.2%)             | 34 ( 1.2%)             |
| SUMATRIPTAN                          | 16 ( 1.1%)             | 18 ( 1.2%)             | 34 ( 1.2%)             |
| ECONAZOLE                            | 17 ( 1.2%)             | 16 ( 1.1%)             | 33 ( 1.1%)             |
| ERGOCALCIFEROL                       | 22 ( 1.5%)             | 11 ( 0.8%)             | 33 ( 1.1%)             |
| ERYTHROMYCIN                         | 13 ( 0.9%)             | 20 ( 1.4%)             | 33 ( 1.1%)             |
| MORPHINE                             | 16 ( 1.1%)             | 17 ( 1.2%)             | 33 ( 1.1%)             |
| PHENYLEPHRINE HYDROCHLORIDE          | 14 ( 1.0%)             | 19 ( 1.3%)             | 33 ( 1.1%)             |
| THIAMINE HYDROCHLORIDE               | 19 ( 1.3%)             | 14 ( 1.0%)             | 33 ( 1.1%)             |
| VENLAFAXINE                          | 20 ( 1.4%)             | 13 ( 0.9%)             | 33 ( 1.1%)             |
| FEXOFENADINE                         | 11 ( 0.8%)             | 21 ( 1.4%)             | 32 ( 1.1%)             |
| HYOSCINE BUTYLBROMIDE                | 15 ( 1.0%)             | 17 ( 1.2%)             | 32 ( 1.1%)             |
| NICOTINAMIDE                         | 19 ( 1.3%)             | 13 ( 0.9%)             | 32 ( 1.1%)             |
| RIBOFLAVIN                           | 19 ( 1.3%)             | 13 ( 0.9%)             | 32 ( 1.1%)             |
| DESLORATADINE                        | 18 ( 1.3%)             | 13 ( 0.9%)             | 31 ( 1.1%)             |
| DEXTROPROPOXYPHENE NAPSILATE         | 19 ( 1.3%)             | 12 ( 0.8%)             | 31 ( 1.1%)             |
| EPINEPHRINE                          | 14 ( 1.0%)             | 17 ( 1.2%)             | 31 ( 1.1%)             |
| ESCITALOPRAM                         | 13 ( 0.9%)             | 18 ( 1.2%)             | 31 ( 1.1%)             |
| FENTANYL                             | 19 ( 1.3%)             | 12 ( 0.8%)             | 31 ( 1.1%)             |
| TIZANIDINE HYDROCHLORIDE             | 14 ( 1.0%)             | 17 ( 1.2%)             | 31 ( 1.1%)             |
| CALCIUM                              | 14 ( 1.0%)             | 16 ( 1.1%)             | 30 ( 1.0%)             |
| FLUOXETINE HYDROCHLORIDE             | 17 ( 1.2%)             | 13 ( 0.9%)             | 30 ( 1.0%)             |
| PROPOFOL                             | 17 ( 1.2%)             | 13 ( 0.9%)             | 30 ( 1.0%)             |
| BUPROPION                            | 16 ( 1.1%)             | 13 ( 0.9%)             | 29 ( 1.0%)             |
| METAMIZOLE SODIUM                    | 12 ( 0.8%)             | 17 ( 1.2%)             | 29 ( 1.0%)             |
| PHEENTERMINE                         | 15 ( 1.0%)             | 14 ( 1.0%)             | 29 ( 1.0%)             |
| BENZOCAINE                           | 10 ( 0.7%)             | 18 ( 1.2%)             | 28 ( 1.0%)             |
| BENZOYL PEROXIDE                     | 14 ( 1.0%)             | 14 ( 1.0%)             | 28 ( 1.0%)             |
| BETA-LACTAMASE SENSITIVE PENICILLINS | 13 ( 0.9%)             | 15 ( 1.0%)             | 28 ( 1.0%)             |
| EBASTINE                             | 13 ( 0.9%)             | 15 ( 1.0%)             | 28 ( 1.0%)             |
| ZOLPIDEM TARTRATE                    | 11 ( 0.8%)             | 17 ( 1.2%)             | 28 ( 1.0%)             |
| CLONAZEPAM                           | 11 ( 0.8%)             | 16 ( 1.1%)             | 27 ( 0.9%)             |
| ETORICOXIB                           | 17 ( 1.2%)             | 10 ( 0.7%)             | 27 ( 0.9%)             |
| KETOROLAC                            | 11 ( 0.8%)             | 16 ( 1.1%)             | 27 ( 0.9%)             |
| LANSOPRAZOLE                         | 11 ( 0.8%)             | 16 ( 1.1%)             | 27 ( 0.9%)             |
| MINOCYCLINE                          | 11 ( 0.8%)             | 16 ( 1.1%)             | 27 ( 0.9%)             |
| MONTELUKAST                          | 6 ( 0.4%)              | 21 ( 1.4%)             | 27 ( 0.9%)             |
| PANTHENOL                            | 18 ( 1.3%)             | 9 ( 0.6%)              | 27 ( 0.9%)             |
| PHENAZOPYRIDINE HYDROCHLORIDE        | 13 ( 0.9%)             | 14 ( 1.0%)             | 27 ( 0.9%)             |
| PSEUDOEPHEDRINE SULFATE              | 16 ( 1.1%)             | 11 ( 0.8%)             | 27 ( 0.9%)             |
| BETAMETHASONE                        | 12 ( 0.8%)             | 14 ( 1.0%)             | 26 ( 0.9%)             |
| LEVOCETIRIZINE DIHYDROCHLORIDE       | 12 ( 0.8%)             | 14 ( 1.0%)             | 26 ( 0.9%)             |
| LOPERAMIDE HYDROCHLORIDE             | 12 ( 0.8%)             | 14 ( 1.0%)             | 26 ( 0.9%)             |
| MULTIVITAMINS, PLAIN                 | 10 ( 0.7%)             | 16 ( 1.1%)             | 26 ( 0.9%)             |
| TRETINOIN                            | 13 ( 0.9%)             | 13 ( 0.9%)             | 26 ( 0.9%)             |
| CALCIUM CARBONATE                    | 10 ( 0.7%)             | 15 ( 1.0%)             | 25 ( 0.9%)             |

**Table 14.1.1 / 38: Number of subjects who took at least one concomitant medication (FAS)**

| Substance                     | LCS12<br>N=1432 (100%) | LCS16<br>N=1452 (100%) | Total<br>N=2884 (100%) |
|-------------------------------|------------------------|------------------------|------------------------|
| FERROUS FUMARATE              | 15 ( 1.0%)             | 10 ( 0.7%)             | 25 ( 0.9%)             |
| FISH OIL                      | 11 ( 0.8%)             | 14 ( 1.0%)             | 25 ( 0.9%)             |
| MELOXICAM                     | 12 ( 0.8%)             | 13 ( 0.9%)             | 25 ( 0.9%)             |
| TETRACYCLINE HYDROCHLORIDE    | 14 ( 1.0%)             | 11 ( 0.8%)             | 25 ( 0.9%)             |
| MEPYRAMINE MALEATE            | 9 ( 0.6%)              | 15 ( 1.0%)             | 24 ( 0.8%)             |
| RANITIDINE HYDROCHLORIDE      | 13 ( 0.9%)             | 11 ( 0.8%)             | 24 ( 0.8%)             |
| TOCOPHEROL                    | 14 ( 1.0%)             | 10 ( 0.7%)             | 24 ( 0.8%)             |
| TRAMADOL HYDROCHLORIDE        | 11 ( 0.8%)             | 13 ( 0.9%)             | 24 ( 0.8%)             |
| CYCLOBENZAPRINE HYDROCHLORIDE | 10 ( 0.7%)             | 13 ( 0.9%)             | 23 ( 0.8%)             |
| DICLOFENAC POTASSIUM          | 12 ( 0.8%)             | 11 ( 0.8%)             | 23 ( 0.8%)             |
| HYDROCHLOROTHIAZIDE           | 12 ( 0.8%)             | 11 ( 0.8%)             | 23 ( 0.8%)             |
| ISOTRETINOIN                  | 15 ( 1.0%)             | 8 ( 0.6%)              | 23 ( 0.8%)             |
| LORAZEPAM                     | 8 ( 0.6%)              | 15 ( 1.0%)             | 23 ( 0.8%)             |
| NORFLOXACIN                   | 16 ( 1.1%)             | 7 ( 0.5%)              | 23 ( 0.8%)             |
| POTASSIUM CHLORIDE            | 12 ( 0.8%)             | 11 ( 0.8%)             | 23 ( 0.8%)             |
| ERGOTAMINE TARTRATE           | 10 ( 0.7%)             | 12 ( 0.8%)             | 22 ( 0.8%)             |
| HEPATITIS A VACCINE           | 10 ( 0.7%)             | 12 ( 0.8%)             | 22 ( 0.8%)             |
| NEOMYCIN SULFATE              | 10 ( 0.7%)             | 12 ( 0.8%)             | 22 ( 0.8%)             |
| TERBUTALINE SULFATE           | 8 ( 0.6%)              | 14 ( 1.0%)             | 22 ( 0.8%)             |
| TETRACYCLINE                  | 11 ( 0.8%)             | 11 ( 0.8%)             | 22 ( 0.8%)             |
| VIRAL VACCINES                | 9 ( 0.6%)              | 13 ( 0.9%)             | 22 ( 0.8%)             |
| ANESTHETICS, GENERAL          | 11 ( 0.8%)             | 10 ( 0.7%)             | 21 ( 0.7%)             |
| FERROUS SULFATE               | 8 ( 0.6%)              | 13 ( 0.9%)             | 21 ( 0.7%)             |
| HEPATITIS B VACCINE           | 9 ( 0.6%)              | 12 ( 0.8%)             | 21 ( 0.7%)             |
| OTHER NUTRIENTS               | 6 ( 0.4%)              | 15 ( 1.0%)             | 21 ( 0.7%)             |
| PARGEVERINE                   | 12 ( 0.8%)             | 9 ( 0.6%)              | 21 ( 0.7%)             |
| PREDNISOLONE                  | 11 ( 0.8%)             | 10 ( 0.7%)             | 21 ( 0.7%)             |
| PRILOCAINE HYDROCHLORIDE      | 12 ( 0.8%)             | 9 ( 0.6%)              | 21 ( 0.7%)             |
| TRAMADOL                      | 9 ( 0.6%)              | 12 ( 0.8%)             | 21 ( 0.7%)             |
| CITALOPRAM                    | 10 ( 0.7%)             | 10 ( 0.7%)             | 20 ( 0.7%)             |
| CLONIXIN LYSINATE             | 10 ( 0.7%)             | 10 ( 0.7%)             | 20 ( 0.7%)             |
| TINIDAZOLE                    | 8 ( 0.6%)              | 12 ( 0.8%)             | 20 ( 0.7%)             |
| TOPIRAMATE                    | 14 ( 1.0%)             | 6 ( 0.4%)              | 20 ( 0.7%)             |
| BROMHEXINE HYDROCHLORIDE      | 9 ( 0.6%)              | 10 ( 0.7%)             | 19 ( 0.7%)             |
| CHLORAMPHENICOL               | 9 ( 0.6%)              | 10 ( 0.7%)             | 19 ( 0.7%)             |
| CLAVULANIC ACID               | 10 ( 0.7%)             | 9 ( 0.6%)              | 19 ( 0.7%)             |
| FORMOTEROL FUMARATE           | 12 ( 0.8%)             | 7 ( 0.5%)              | 19 ( 0.7%)             |
| HYDROMORPHONE HYDROCHLORIDE   | 10 ( 0.7%)             | 9 ( 0.6%)              | 19 ( 0.7%)             |
| LAMOTRIGINE                   | 9 ( 0.6%)              | 10 ( 0.7%)             | 19 ( 0.7%)             |
| MEFENAMIC ACID                | 12 ( 0.8%)             | 7 ( 0.5%)              | 19 ( 0.7%)             |
| OSELTAMIVIR                   | 8 ( 0.6%)              | 11 ( 0.8%)             | 19 ( 0.7%)             |
| SALBUTAMOL SULFATE            | 8 ( 0.6%)              | 11 ( 0.8%)             | 19 ( 0.7%)             |
| SALMETEROL XINAFOATE          | 9 ( 0.6%)              | 10 ( 0.7%)             | 19 ( 0.7%)             |
| ANILIDES                      | 8 ( 0.6%)              | 10 ( 0.7%)             | 18 ( 0.6%)             |
| CO-TRIMOXAZOLE                | 10 ( 0.7%)             | 8 ( 0.6%)              | 18 ( 0.6%)             |

**Table 14.1.1 / 38: Number of subjects who took at least one concomitant medication (FAS)**

| Substance                              | LCS12<br>N=1432 (100%) | LCS16<br>N=1452 (100%) | Total<br>N=2884 (100%) |
|----------------------------------------|------------------------|------------------------|------------------------|
| ETONOGESTREL                           | 5 ( 0.3%)              | 13 ( 0.9%)             | 18 ( 0.6%)             |
| FUSIDIC ACID                           | 8 ( 0.6%)              | 10 ( 0.7%)             | 18 ( 0.6%)             |
| MICONAZOLE                             | 4 ( 0.3%)              | 14 ( 1.0%)             | 18 ( 0.6%)             |
| NORETHISTERONE ACETATE                 | 10 ( 0.7%)             | 8 ( 0.6%)              | 18 ( 0.6%)             |
| PANTOPRAZOLE                           | 9 ( 0.6%)              | 9 ( 0.6%)              | 18 ( 0.6%)             |
| PANTOPRAZOLE SODIUM                    | 8 ( 0.6%)              | 10 ( 0.7%)             | 18 ( 0.6%)             |
| PROPRANOLOL                            | 10 ( 0.7%)             | 8 ( 0.6%)              | 18 ( 0.6%)             |
| ADAPALENE                              | 7 ( 0.5%)              | 10 ( 0.7%)             | 17 ( 0.6%)             |
| ANTI-ACNE PREPARATIONS FOR TOPICAL USE | 9 ( 0.6%)              | 8 ( 0.6%)              | 17 ( 0.6%)             |
| ANTIDIARRHOEAL MICROORGANISMS          | 7 ( 0.5%)              | 10 ( 0.7%)             | 17 ( 0.6%)             |
| CIPROFLOXACIN HYDROCHLORIDE            | 8 ( 0.6%)              | 9 ( 0.6%)              | 17 ( 0.6%)             |
| LEVOTHYROXINE                          | 8 ( 0.6%)              | 9 ( 0.6%)              | 17 ( 0.6%)             |
| NORGESTIMATE                           | 10 ( 0.7%)             | 7 ( 0.5%)              | 17 ( 0.6%)             |
| PSEUDOEPHEDRINE                        | 8 ( 0.6%)              | 9 ( 0.6%)              | 17 ( 0.6%)             |
| ZOPICLONE                              | 7 ( 0.5%)              | 10 ( 0.7%)             | 17 ( 0.6%)             |
| AMFETAMINE SULFATE                     | 8 ( 0.6%)              | 8 ( 0.6%)              | 16 ( 0.6%)             |
| COUGH AND COLD PREPARATIONS            | 6 ( 0.4%)              | 10 ( 0.7%)             | 16 ( 0.6%)             |
| DEXAMFETAMINE SULFATE                  | 7 ( 0.5%)              | 9 ( 0.6%)              | 16 ( 0.6%)             |
| DOCUSATE SODIUM                        | 7 ( 0.5%)              | 9 ( 0.6%)              | 16 ( 0.6%)             |
| FAMOTIDINE                             | 9 ( 0.6%)              | 7 ( 0.5%)              | 16 ( 0.6%)             |
| FLUOXETINE                             | 4 ( 0.3%)              | 12 ( 0.8%)             | 16 ( 0.6%)             |
| MINOCYCLINE HYDROCHLORIDE              | 12 ( 0.8%)             | 4 ( 0.3%)              | 16 ( 0.6%)             |
| ORPHENADRINE CITRATE                   | 6 ( 0.4%)              | 10 ( 0.7%)             | 16 ( 0.6%)             |
| PHLOROGLUCINOL                         | 7 ( 0.5%)              | 9 ( 0.6%)              | 16 ( 0.6%)             |
| VITAMIN B NOS                          | 8 ( 0.6%)              | 8 ( 0.6%)              | 16 ( 0.6%)             |
| AMFETAMINE ASPARTATE                   | 7 ( 0.5%)              | 8 ( 0.6%)              | 15 ( 0.5%)             |
| BIOTIN                                 | 7 ( 0.5%)              | 8 ( 0.6%)              | 15 ( 0.5%)             |
| CODEINE                                | 10 ( 0.7%)             | 5 ( 0.3%)              | 15 ( 0.5%)             |
| DEXAMFETAMINE SACCHARATE               | 7 ( 0.5%)              | 8 ( 0.6%)              | 15 ( 0.5%)             |
| DOXYCYCLINE MONOHYDRATE                | 5 ( 0.3%)              | 10 ( 0.7%)             | 15 ( 0.5%)             |
| EPHEDRINE HYDROCHLORIDE                | 6 ( 0.4%)              | 9 ( 0.6%)              | 15 ( 0.5%)             |
| HERBAL PREPARATION                     | 4 ( 0.3%)              | 11 ( 0.8%)             | 15 ( 0.5%)             |
| PRILOCAINE                             | 6 ( 0.4%)              | 9 ( 0.6%)              | 15 ( 0.5%)             |
| VITAMINS                               | 8 ( 0.6%)              | 7 ( 0.5%)              | 15 ( 0.5%)             |
| ANTIBIOTICS                            | 9 ( 0.6%)              | 5 ( 0.3%)              | 14 ( 0.5%)             |
| CEFTRIAZONE                            | 5 ( 0.3%)              | 9 ( 0.6%)              | 14 ( 0.5%)             |
| CYCLOBENZAPRINE                        | 7 ( 0.5%)              | 7 ( 0.5%)              | 14 ( 0.5%)             |
| DESOGESTREL                            | 6 ( 0.4%)              | 8 ( 0.6%)              | 14 ( 0.5%)             |
| DIMENHYDRINATE                         | 5 ( 0.3%)              | 9 ( 0.6%)              | 14 ( 0.5%)             |
| DULOXETINE HYDROCHLORIDE               | 9 ( 0.6%)              | 5 ( 0.3%)              | 14 ( 0.5%)             |
| FLUTICASONE                            | 8 ( 0.6%)              | 6 ( 0.4%)              | 14 ( 0.5%)             |
| MIDAZOLAM HYDROCHLORIDE                | 10 ( 0.7%)             | 4 ( 0.3%)              | 14 ( 0.5%)             |
| NICOTINIC ACID                         | 10 ( 0.7%)             | 4 ( 0.3%)              | 14 ( 0.5%)             |
| NORETHISTERONE                         | 9 ( 0.6%)              | 5 ( 0.3%)              | 14 ( 0.5%)             |
| PETHIDINE HYDROCHLORIDE                | 7 ( 0.5%)              | 7 ( 0.5%)              | 14 ( 0.5%)             |



**Table 14.1.1 / 38: Number of subjects who took at least one concomitant medication (FAS)**

| Substance                                     | LCS12<br>N=1432 (100%) | LCS16<br>N=1452 (100%) | Total<br>N=2884 (100%) |
|-----------------------------------------------|------------------------|------------------------|------------------------|
| PODOPHYLLOTOXIN                               | 7 ( 0.5%)              | 7 ( 0.5%)              | 14 ( 0.5%)             |
| RIZATRIPTAN                                   | 7 ( 0.5%)              | 7 ( 0.5%)              | 14 ( 0.5%)             |
| VITAMIN D NOS                                 | 7 ( 0.5%)              | 7 ( 0.5%)              | 14 ( 0.5%)             |
| ANTISPASMODICS IN COMBINATION WITH ANALGESICS | 7 ( 0.5%)              | 6 ( 0.4%)              | 13 ( 0.5%)             |
| BECLOMETASONE DIPROPIONATE                    | 5 ( 0.3%)              | 8 ( 0.6%)              | 13 ( 0.5%)             |
| BETAMETHASONE VALERATE                        | 4 ( 0.3%)              | 9 ( 0.6%)              | 13 ( 0.5%)             |
| BUPROPION HYDROCHLORIDE                       | 8 ( 0.6%)              | 5 ( 0.3%)              | 13 ( 0.5%)             |
| CEFAZOLIN SODIUM                              | 8 ( 0.6%)              | 5 ( 0.3%)              | 13 ( 0.5%)             |
| CROMOGLICATE SODIUM                           | 7 ( 0.5%)              | 6 ( 0.4%)              | 13 ( 0.5%)             |
| EPINEPHRINE HYDROCHLORIDE                     | 8 ( 0.6%)              | 5 ( 0.3%)              | 13 ( 0.5%)             |
| ETHYLMORPHINE HYDROCHLORIDE                   | 6 ( 0.4%)              | 7 ( 0.5%)              | 13 ( 0.5%)             |
| FELYPRESSIN                                   | 6 ( 0.4%)              | 7 ( 0.5%)              | 13 ( 0.5%)             |
| MAGNESIUM                                     | 5 ( 0.3%)              | 8 ( 0.6%)              | 13 ( 0.5%)             |
| METHYLPREDNISOLONE                            | 7 ( 0.5%)              | 6 ( 0.4%)              | 13 ( 0.5%)             |
| MIRTAZAPINE                                   | 6 ( 0.4%)              | 7 ( 0.5%)              | 13 ( 0.5%)             |
| OXAZEPAM                                      | 6 ( 0.4%)              | 7 ( 0.5%)              | 13 ( 0.5%)             |
| PHENYLPROPANOLAMINE HYDROCHLORIDE             | 4 ( 0.3%)              | 9 ( 0.6%)              | 13 ( 0.5%)             |
| POLYMYXIN B SULFATE                           | 6 ( 0.4%)              | 7 ( 0.5%)              | 13 ( 0.5%)             |
| PRIDINOL MESILATE                             | 7 ( 0.5%)              | 6 ( 0.4%)              | 13 ( 0.5%)             |
| PYRIDOXINE HYDROCHLORIDE                      | 6 ( 0.4%)              | 7 ( 0.5%)              | 13 ( 0.5%)             |
| QUETIAPINE                                    | 4 ( 0.3%)              | 9 ( 0.6%)              | 13 ( 0.5%)             |
| TIOCONAZOLE                                   | 9 ( 0.6%)              | 4 ( 0.3%)              | 13 ( 0.5%)             |
| TRANEXAMIC ACID                               | 9 ( 0.6%)              | 4 ( 0.3%)              | 13 ( 0.5%)             |
| UNCODEABLE "UNCLASSIFIABLE"                   | 6 ( 0.4%)              | 7 ( 0.5%)              | 13 ( 0.5%)             |
| ANTIINFECTIVES/ANTISEPT.,EXCL COMB WITH CORTI | 5 ( 0.3%)              | 7 ( 0.5%)              | 12 ( 0.4%)             |
| ATOVAQUONE                                    | 7 ( 0.5%)              | 5 ( 0.3%)              | 12 ( 0.4%)             |
| AZELAIC ACID                                  | 5 ( 0.3%)              | 7 ( 0.5%)              | 12 ( 0.4%)             |
| BUPIVACAINE                                   | 5 ( 0.3%)              | 7 ( 0.5%)              | 12 ( 0.4%)             |
| CEFUROXIME                                    | 3 ( 0.2%)              | 9 ( 0.6%)              | 12 ( 0.4%)             |
| CETIRIZINE                                    | 5 ( 0.3%)              | 7 ( 0.5%)              | 12 ( 0.4%)             |
| GESTODENE                                     | 8 ( 0.6%)              | 4 ( 0.3%)              | 12 ( 0.4%)             |
| HYDROXYZINE                                   | 4 ( 0.3%)              | 8 ( 0.6%)              | 12 ( 0.4%)             |
| MACROGOL                                      | 5 ( 0.3%)              | 7 ( 0.5%)              | 12 ( 0.4%)             |
| METFORMIN                                     | 5 ( 0.3%)              | 7 ( 0.5%)              | 12 ( 0.4%)             |
| METHOCARBAMOL                                 | 6 ( 0.4%)              | 6 ( 0.4%)              | 12 ( 0.4%)             |
| OFLOXACIN                                     | 6 ( 0.4%)              | 6 ( 0.4%)              | 12 ( 0.4%)             |
| PAROXETINE HYDROCHLORIDE                      | 6 ( 0.4%)              | 6 ( 0.4%)              | 12 ( 0.4%)             |
| PROGUANIL HYDROCHLORIDE                       | 7 ( 0.5%)              | 5 ( 0.3%)              | 12 ( 0.4%)             |
| TERBINAFINE                                   | 7 ( 0.5%)              | 5 ( 0.3%)              | 12 ( 0.4%)             |
| TRIMETHYLPHLOROGLUCINOL                       | 6 ( 0.4%)              | 6 ( 0.4%)              | 12 ( 0.4%)             |
| VARENICLINE TARTRATE                          | 5 ( 0.3%)              | 7 ( 0.5%)              | 12 ( 0.4%)             |
| XYLOMETAZOLINE HYDROCHLORIDE                  | 2 ( 0.1%)              | 10 ( 0.7%)             | 12 ( 0.4%)             |
| AMITRIPTYLINE HYDROCHLORIDE                   | 5 ( 0.3%)              | 6 ( 0.4%)              | 11 ( 0.4%)             |
| ANTIINFECTIVES/ANTISEPTICS IN COMB.WITH CORTI | 6 ( 0.4%)              | 5 ( 0.3%)              | 11 ( 0.4%)             |
| BETAMETHASONE SODIUM PHOSPHATE                | 7 ( 0.5%)              | 4 ( 0.3%)              | 11 ( 0.4%)             |

**Table 14.1.1 / 38: Number of subjects who took at least one concomitant medication (FAS)**

| Substance                         | LCS12<br>N=1432 (100%) | LCS16<br>N=1452 (100%) | Total<br>N=2884 (100%) |
|-----------------------------------|------------------------|------------------------|------------------------|
| BISMUTH SUBSALICYLATE             | 3 ( 0.2%)              | 8 ( 0.6%)              | 11 ( 0.4%)             |
| BUPIVACAINE HYDROCHLORIDE         | 6 ( 0.4%)              | 5 ( 0.3%)              | 11 ( 0.4%)             |
| BUTALBITAL                        | 6 ( 0.4%)              | 5 ( 0.3%)              | 11 ( 0.4%)             |
| BUTOCONAZOLE NITRATE              | 6 ( 0.4%)              | 5 ( 0.3%)              | 11 ( 0.4%)             |
| CYCLIZINE HYDROCHLORIDE           | 4 ( 0.3%)              | 7 ( 0.5%)              | 11 ( 0.4%)             |
| DOXYCYCLINE HYCLATE               | 4 ( 0.3%)              | 7 ( 0.5%)              | 11 ( 0.4%)             |
| DRUGS USED IN NICOTINE DEPENDENCE | 9 ( 0.6%)              | 2 ( 0.1%)              | 11 ( 0.4%)             |
| FLUTICASONE FUROATE               | 5 ( 0.3%)              | 6 ( 0.4%)              | 11 ( 0.4%)             |
| KETOCONAZOLE                      | 4 ( 0.3%)              | 7 ( 0.5%)              | 11 ( 0.4%)             |
| LISINAPRIL                        | 6 ( 0.4%)              | 5 ( 0.3%)              | 11 ( 0.4%)             |
| METOCLOPRAMIDE HYDROCHLORIDE      | 8 ( 0.6%)              | 3 ( 0.2%)              | 11 ( 0.4%)             |
| MOXIFLOXACIN HYDROCHLORIDE        | 6 ( 0.4%)              | 5 ( 0.3%)              | 11 ( 0.4%)             |
| RANITIDINE                        | 7 ( 0.5%)              | 4 ( 0.3%)              | 11 ( 0.4%)             |
| SIBUTRAMINE HYDROCHLORIDE         | 8 ( 0.6%)              | 3 ( 0.2%)              | 11 ( 0.4%)             |
| AMPICILLIN                        | 6 ( 0.4%)              | 4 ( 0.3%)              | 10 ( 0.3%)             |
| CALCIUM CHLORIDE DIHYDRATE        | 5 ( 0.3%)              | 5 ( 0.3%)              | 10 ( 0.3%)             |
| ENOXAPARIN SODIUM                 | 1 ( <0.1%)             | 9 ( 0.6%)              | 10 ( 0.3%)             |
| IMIQUIMOD                         | 4 ( 0.3%)              | 6 ( 0.4%)              | 10 ( 0.3%)             |
| INFLUENZA VACCINE INACTIVATED     | 4 ( 0.3%)              | 6 ( 0.4%)              | 10 ( 0.3%)             |
| LACTOBACILLUS ACIDOPHILUS         | 4 ( 0.3%)              | 6 ( 0.4%)              | 10 ( 0.3%)             |
| MELATONIN                         | 6 ( 0.4%)              | 4 ( 0.3%)              | 10 ( 0.3%)             |
| MESALAZINE                        | 7 ( 0.5%)              | 3 ( 0.2%)              | 10 ( 0.3%)             |
| METAMIZOLE                        | 4 ( 0.3%)              | 6 ( 0.4%)              | 10 ( 0.3%)             |
| MIDAZOLAM                         | 4 ( 0.3%)              | 6 ( 0.4%)              | 10 ( 0.3%)             |
| OXYCODONE                         | 6 ( 0.4%)              | 4 ( 0.3%)              | 10 ( 0.3%)             |
| PAROXETINE                        | 7 ( 0.5%)              | 3 ( 0.2%)              | 10 ( 0.3%)             |
| ROXITHROMYCIN                     | 5 ( 0.3%)              | 5 ( 0.3%)              | 10 ( 0.3%)             |
| SODIUM LACTATE                    | 5 ( 0.3%)              | 5 ( 0.3%)              | 10 ( 0.3%)             |
| TRIAMTERENE                       | 4 ( 0.3%)              | 6 ( 0.4%)              | 10 ( 0.3%)             |
| ZOLMITRIPTAN                      | 6 ( 0.4%)              | 4 ( 0.3%)              | 10 ( 0.3%)             |
| ATROPINE SULFATE                  | 3 ( 0.2%)              | 6 ( 0.4%)              | 9 ( 0.3%)              |
| BUSPIRONE HYDROCHLORIDE           | 5 ( 0.3%)              | 4 ( 0.3%)              | 9 ( 0.3%)              |
| CARISOPRODOL                      | 6 ( 0.4%)              | 3 ( 0.2%)              | 9 ( 0.3%)              |
| CLONIXIN                          | 6 ( 0.4%)              | 3 ( 0.2%)              | 9 ( 0.3%)              |
| DOCOSAHEXANOIC ACID               | 5 ( 0.3%)              | 4 ( 0.3%)              | 9 ( 0.3%)              |
| EICOSAPENTAENOIC ACID             | 5 ( 0.3%)              | 4 ( 0.3%)              | 9 ( 0.3%)              |
| FEXOFENADINE HYDROCHLORIDE        | 6 ( 0.4%)              | 3 ( 0.2%)              | 9 ( 0.3%)              |
| MAGNESIUM HYDROXIDE               | 2 ( 0.1%)              | 7 ( 0.5%)              | 9 ( 0.3%)              |
| MEFLOQUINE                        | 5 ( 0.3%)              | 4 ( 0.3%)              | 9 ( 0.3%)              |
| METAXALONE                        | 2 ( 0.1%)              | 7 ( 0.5%)              | 9 ( 0.3%)              |
| POTASSIUM                         | 4 ( 0.3%)              | 5 ( 0.3%)              | 9 ( 0.3%)              |
| RIZATRIPTAN BENZOATE              | 5 ( 0.3%)              | 4 ( 0.3%)              | 9 ( 0.3%)              |
| ROCURONIUM BROMIDE                | 2 ( 0.1%)              | 7 ( 0.5%)              | 9 ( 0.3%)              |
| SALICYLAMIDE                      | 4 ( 0.3%)              | 5 ( 0.3%)              | 9 ( 0.3%)              |
| SIBUTRAMINE                       | 6 ( 0.4%)              | 3 ( 0.2%)              | 9 ( 0.3%)              |

**Table 14.1.1 / 38: Number of subjects who took at least one concomitant medication (FAS)**

| Substance                                  | LCS12<br>N=1432 (100%) | LCS16<br>N=1452 (100%) | Total<br>N=2884 (100%) |
|--------------------------------------------|------------------------|------------------------|------------------------|
| SODIUM BICARBONATE                         | 3 ( 0.2%)              | 6 ( 0.4%)              | 9 ( 0.3%)              |
| SPIRONOLACTONE                             | 5 ( 0.3%)              | 4 ( 0.3%)              | 9 ( 0.3%)              |
| TEMAZEPAM                                  | 3 ( 0.2%)              | 6 ( 0.4%)              | 9 ( 0.3%)              |
| AMINOPHENAZONE                             | 2 ( 0.1%)              | 6 ( 0.4%)              | 8 ( 0.3%)              |
| DESVENLAFAXINE SUCCINATE                   | 2 ( 0.1%)              | 6 ( 0.4%)              | 8 ( 0.3%)              |
| DIET FORMULATIONS FOR TREATMENT OF OBESITY | 5 ( 0.3%)              | 3 ( 0.2%)              | 8 ( 0.3%)              |
| DIPHENHYDRAMINE                            | 4 ( 0.3%)              | 4 ( 0.3%)              | 8 ( 0.3%)              |
| ESTRIOL                                    | 2 ( 0.1%)              | 6 ( 0.4%)              | 8 ( 0.3%)              |
| GLUCOSAMINE                                | 2 ( 0.1%)              | 6 ( 0.4%)              | 8 ( 0.3%)              |
| GLYCOPYRRONIUM BROMIDE                     | 5 ( 0.3%)              | 3 ( 0.2%)              | 8 ( 0.3%)              |
| GUAREA GUIDONIA                            | 4 ( 0.3%)              | 4 ( 0.3%)              | 8 ( 0.3%)              |
| INFLUENZA VIRUS VACCINE POLYVALENT         | 3 ( 0.2%)              | 5 ( 0.3%)              | 8 ( 0.3%)              |
| LACTULOSE                                  | 3 ( 0.2%)              | 5 ( 0.3%)              | 8 ( 0.3%)              |
| MECLOZINE                                  | 3 ( 0.2%)              | 5 ( 0.3%)              | 8 ( 0.3%)              |
| NICOTINE                                   | 1 ( <0.1%)             | 7 ( 0.5%)              | 8 ( 0.3%)              |
| NORELGESTROMIN                             | 4 ( 0.3%)              | 4 ( 0.3%)              | 8 ( 0.3%)              |
| PROMETHAZINE HYDROCHLORIDE                 | 5 ( 0.3%)              | 3 ( 0.2%)              | 8 ( 0.3%)              |
| RABEPRAZOLE SODIUM                         | 5 ( 0.3%)              | 3 ( 0.2%)              | 8 ( 0.3%)              |
| SIMETICONE                                 | 3 ( 0.2%)              | 5 ( 0.3%)              | 8 ( 0.3%)              |
| SUXAMETHONIUM CHLORIDE                     | 7 ( 0.5%)              | 1 ( <0.1%)             | 8 ( 0.3%)              |
| VENLAFAXINE HYDROCHLORIDE                  | 2 ( 0.1%)              | 6 ( 0.4%)              | 8 ( 0.3%)              |
| XYLOMETAZOLINE                             | 5 ( 0.3%)              | 3 ( 0.2%)              | 8 ( 0.3%)              |
| ZINC                                       | 3 ( 0.2%)              | 5 ( 0.3%)              | 8 ( 0.3%)              |
| AMITRIPTYLINE                              | 5 ( 0.3%)              | 2 ( 0.1%)              | 7 ( 0.2%)              |
| ARIPIPRAZOLE                               | 3 ( 0.2%)              | 4 ( 0.3%)              | 7 ( 0.2%)              |
| ATORVASTATIN CALCIUM                       | 4 ( 0.3%)              | 3 ( 0.2%)              | 7 ( 0.2%)              |
| CEFADROXIL                                 | 2 ( 0.1%)              | 5 ( 0.3%)              | 7 ( 0.2%)              |
| CEFPROZIL                                  | 4 ( 0.3%)              | 3 ( 0.2%)              | 7 ( 0.2%)              |
| CEFUROXIME SODIUM                          | 5 ( 0.3%)              | 2 ( 0.1%)              | 7 ( 0.2%)              |
| CELECOXIB                                  | 2 ( 0.1%)              | 5 ( 0.3%)              | 7 ( 0.2%)              |
| CLOBETASOL PROPIONATE                      | 1 ( <0.1%)             | 6 ( 0.4%)              | 7 ( 0.2%)              |
| CORTISONE                                  | 4 ( 0.3%)              | 3 ( 0.2%)              | 7 ( 0.2%)              |
| GABAPENTIN                                 | 3 ( 0.2%)              | 4 ( 0.3%)              | 7 ( 0.2%)              |
| GLUCOSE                                    | 5 ( 0.3%)              | 2 ( 0.1%)              | 7 ( 0.2%)              |
| GRAMICIDIN                                 | 4 ( 0.3%)              | 3 ( 0.2%)              | 7 ( 0.2%)              |
| HYDROCORTISONE ACETATE                     | 4 ( 0.3%)              | 3 ( 0.2%)              | 7 ( 0.2%)              |
| HYOSCYAMINE SULFATE                        | 1 ( <0.1%)             | 6 ( 0.4%)              | 7 ( 0.2%)              |
| ITRACONAZOLE                               | 1 ( <0.1%)             | 6 ( 0.4%)              | 7 ( 0.2%)              |
| MEPIVACAINE HYDROCHLORIDE                  | 2 ( 0.1%)              | 5 ( 0.3%)              | 7 ( 0.2%)              |
| METHYLPHENIDATE HYDROCHLORIDE              | 3 ( 0.2%)              | 4 ( 0.3%)              | 7 ( 0.2%)              |
| NIMESULIDE                                 | 2 ( 0.1%)              | 5 ( 0.3%)              | 7 ( 0.2%)              |
| OLANZAPINE                                 | 4 ( 0.3%)              | 3 ( 0.2%)              | 7 ( 0.2%)              |
| OXYMETAZOLINE HYDROCHLORIDE                | 5 ( 0.3%)              | 2 ( 0.1%)              | 7 ( 0.2%)              |
| PHENIRAMINE MALEATE                        | 3 ( 0.2%)              | 4 ( 0.3%)              | 7 ( 0.2%)              |
| PREGABALIN                                 | 4 ( 0.3%)              | 3 ( 0.2%)              | 7 ( 0.2%)              |

**Table 14.1.1 / 38: Number of subjects who took at least one concomitant medication (FAS)**

| Substance                       | LCS12<br>N=1432 (100%) | LCS16<br>N=1452 (100%) | Total<br>N=2884 (100%) |
|---------------------------------|------------------------|------------------------|------------------------|
| SALICYLIC ACID                  | 5 ( 0.3%)              | 2 ( 0.1%)              | 7 ( 0.2%)              |
| TOBRAMYCIN                      | 5 ( 0.3%)              | 2 ( 0.1%)              | 7 ( 0.2%)              |
| TOLFENAMIC ACID                 | 1 (<0.1%)              | 6 ( 0.4%)              | 7 ( 0.2%)              |
| YELLOW FEVER VACCINE            | 2 ( 0.1%)              | 5 ( 0.3%)              | 7 ( 0.2%)              |
| ANAESTHETICS, LOCAL             | 3 ( 0.2%)              | 3 ( 0.2%)              | 6 ( 0.2%)              |
| ANTIFUNGALS FOR TOPICAL USE     | 2 ( 0.1%)              | 4 ( 0.3%)              | 6 ( 0.2%)              |
| BETAMETHASONE DIPROPIONATE      | 2 ( 0.1%)              | 4 ( 0.3%)              | 6 ( 0.2%)              |
| BISOPROLOL                      | 3 ( 0.2%)              | 3 ( 0.2%)              | 6 ( 0.2%)              |
| CARBAMAZEPINE                   | 2 ( 0.1%)              | 4 ( 0.3%)              | 6 ( 0.2%)              |
| CHLORPHENAMINE                  | 4 ( 0.3%)              | 2 ( 0.1%)              | 6 ( 0.2%)              |
| CYPROTERONE ACETATE             | 2 ( 0.1%)              | 4 ( 0.3%)              | 6 ( 0.2%)              |
| DICHLORALPHENAZONE              | 2 ( 0.1%)              | 4 ( 0.3%)              | 6 ( 0.2%)              |
| DIPHThERIA AND TETANUS VACCINES | 3 ( 0.2%)              | 3 ( 0.2%)              | 6 ( 0.2%)              |
| ECONAZOLE NITRATE               | 4 ( 0.3%)              | 2 ( 0.1%)              | 6 ( 0.2%)              |
| FOSFOMYCIN TROMETAMOL           | 3 ( 0.2%)              | 3 ( 0.2%)              | 6 ( 0.2%)              |
| GENTAMICIN                      | 5 ( 0.3%)              | 1 (<0.1%)              | 6 ( 0.2%)              |
| HYDROCORTISONE BUTYRATE         | 3 ( 0.2%)              | 3 ( 0.2%)              | 6 ( 0.2%)              |
| MEBEVERINE                      | 5 ( 0.3%)              | 1 (<0.1%)              | 6 ( 0.2%)              |
| METHOTREXATE                    | 2 ( 0.1%)              | 4 ( 0.3%)              | 6 ( 0.2%)              |
| METOPROLOL SUCCINATE            | 3 ( 0.2%)              | 3 ( 0.2%)              | 6 ( 0.2%)              |
| NATAMYCIN                       | 3 ( 0.2%)              | 3 ( 0.2%)              | 6 ( 0.2%)              |
| PAMABROM                        | 2 ( 0.1%)              | 4 ( 0.3%)              | 6 ( 0.2%)              |
| PHENAZOPYRIDINE                 | 4 ( 0.3%)              | 2 ( 0.1%)              | 6 ( 0.2%)              |
| PIMECROLIMUS                    | 3 ( 0.2%)              | 3 ( 0.2%)              | 6 ( 0.2%)              |
| PIROXICAM                       | 4 ( 0.3%)              | 2 ( 0.1%)              | 6 ( 0.2%)              |
| PYRVINIUM EMBONATE              | 4 ( 0.3%)              | 2 ( 0.1%)              | 6 ( 0.2%)              |
| SALMETEROL                      | 1 (<0.1%)              | 5 ( 0.3%)              | 6 ( 0.2%)              |
| SUCRALFATE                      | 2 ( 0.1%)              | 4 ( 0.3%)              | 6 ( 0.2%)              |
| SULFADIAZINE                    | 4 ( 0.3%)              | 2 ( 0.1%)              | 6 ( 0.2%)              |
| TRAZODONE                       | 2 ( 0.1%)              | 4 ( 0.3%)              | 6 ( 0.2%)              |
| TYPHOID VACCINE                 | 2 ( 0.1%)              | 4 ( 0.3%)              | 6 ( 0.2%)              |
| ZOLPIDEM                        | 2 ( 0.1%)              | 4 ( 0.3%)              | 6 ( 0.2%)              |
| ACETYLCYSTEINE                  | 2 ( 0.1%)              | 3 ( 0.2%)              | 5 ( 0.2%)              |
| ALMOTRIPTAN MALATE              | 3 ( 0.2%)              | 2 ( 0.1%)              | 5 ( 0.2%)              |
| ALUMINIUM HYDROXIDE             | 0                      | 5 ( 0.3%)              | 5 ( 0.2%)              |
| AMLODIPINE                      | 3 ( 0.2%)              | 2 ( 0.1%)              | 5 ( 0.2%)              |
| ANTI-ACNE PREPARATIONS          | 3 ( 0.2%)              | 2 ( 0.1%)              | 5 ( 0.2%)              |
| ASTEMIZOLE                      | 5 ( 0.3%)              | 0                      | 5 ( 0.2%)              |
| ATENOLOL                        | 1 (<0.1%)              | 4 ( 0.3%)              | 5 ( 0.2%)              |
| BACITRACIN                      | 1 (<0.1%)              | 4 ( 0.3%)              | 5 ( 0.2%)              |
| CHOLERA VACCINE                 | 3 ( 0.2%)              | 2 ( 0.1%)              | 5 ( 0.2%)              |
| CHORIONIC GONADOTROPHIN         | 4 ( 0.3%)              | 1 (<0.1%)              | 5 ( 0.2%)              |
| CINCHOCAINE HYDROCHLORIDE       | 4 ( 0.3%)              | 1 (<0.1%)              | 5 ( 0.2%)              |
| DEXTROPROPOXYPHENE              | 2 ( 0.1%)              | 3 ( 0.2%)              | 5 ( 0.2%)              |
| DIOSMIN                         | 2 ( 0.1%)              | 3 ( 0.2%)              | 5 ( 0.2%)              |

**Table 14.1.1 / 38: Number of subjects who took at least one concomitant medication (FAS)**

| Substance                                    | LCS12<br>N=1432 (100%) | LCS16<br>N=1452 (100%) | Total<br>N=2884 (100%) |
|----------------------------------------------|------------------------|------------------------|------------------------|
| DIPHENHYDRAMINE, COMBINATIONS                | 2 ( 0.1%)              | 3 ( 0.2%)              | 5 ( 0.2%)              |
| EPHEDRINE                                    | 4 ( 0.3%)              | 1 ( <0.1%)             | 5 ( 0.2%)              |
| ERGOT ALKALOIDS                              | 2 ( 0.1%)              | 3 ( 0.2%)              | 5 ( 0.2%)              |
| ESTRADIOL                                    | 3 ( 0.2%)              | 2 ( 0.1%)              | 5 ( 0.2%)              |
| ESZOPICLONE                                  | 2 ( 0.1%)              | 3 ( 0.2%)              | 5 ( 0.2%)              |
| FERROUS GLYCINE SULFATE                      | 3 ( 0.2%)              | 2 ( 0.1%)              | 5 ( 0.2%)              |
| HERBAL NOS                                   | 1 ( <0.1%)             | 4 ( 0.3%)              | 5 ( 0.2%)              |
| HESPERIDIN                                   | 2 ( 0.1%)              | 3 ( 0.2%)              | 5 ( 0.2%)              |
| HYDROXYZINE HYDROCHLORIDE                    | 4 ( 0.3%)              | 1 ( <0.1%)             | 5 ( 0.2%)              |
| ISOMETHEPTENE                                | 2 ( 0.1%)              | 3 ( 0.2%)              | 5 ( 0.2%)              |
| LACTIC ACID                                  | 1 ( <0.1%)             | 4 ( 0.3%)              | 5 ( 0.2%)              |
| LACTOBACILLUS ACIDOPHILUS, LYOPHILIZED       | 2 ( 0.1%)              | 3 ( 0.2%)              | 5 ( 0.2%)              |
| MEDROXYPROGESTERONE ACETATE                  | 2 ( 0.1%)              | 3 ( 0.2%)              | 5 ( 0.2%)              |
| NOSCAPINE                                    | 5 ( 0.3%)              | 0                      | 5 ( 0.2%)              |
| NOSCAPINE HYDROCHLORIDE                      | 5 ( 0.3%)              | 0                      | 5 ( 0.2%)              |
| OTHER ANTISPASMODICS AND ANTICHOLINERGICS IN | 3 ( 0.2%)              | 2 ( 0.1%)              | 5 ( 0.2%)              |
| PIPERACILLIN SODIUM                          | 3 ( 0.2%)              | 2 ( 0.1%)              | 5 ( 0.2%)              |
| POLYCARBOPHIL CALCIUM                        | 1 ( <0.1%)             | 4 ( 0.3%)              | 5 ( 0.2%)              |
| POLYGALA SENEGA EXTRACT                      | 1 ( <0.1%)             | 4 ( 0.3%)              | 5 ( 0.2%)              |
| PREDNISOLONE ACETATE                         | 1 ( <0.1%)             | 4 ( 0.3%)              | 5 ( 0.2%)              |
| PROGESTERONE                                 | 2 ( 0.1%)              | 3 ( 0.2%)              | 5 ( 0.2%)              |
| PSYLLIUM HYDROPHILIC MUCILLOID               | 2 ( 0.1%)              | 3 ( 0.2%)              | 5 ( 0.2%)              |
| REMIFENTANIL HYDROCHLORIDE                   | 4 ( 0.3%)              | 1 ( <0.1%)             | 5 ( 0.2%)              |
| TACROLIMUS                                   | 1 ( <0.1%)             | 4 ( 0.3%)              | 5 ( 0.2%)              |
| TAZOBACTAM SODIUM                            | 3 ( 0.2%)              | 2 ( 0.1%)              | 5 ( 0.2%)              |
| TETANUS VACCINE                              | 1 ( <0.1%)             | 4 ( 0.3%)              | 5 ( 0.2%)              |
| VITAMIN B                                    | 2 ( 0.1%)              | 3 ( 0.2%)              | 5 ( 0.2%)              |
| VITAMIN-B-KOMPLEX STANDARD                   | 2 ( 0.1%)              | 3 ( 0.2%)              | 5 ( 0.2%)              |
| AMBROXOL HYDROCHLORIDE                       | 4 ( 0.3%)              | 0                      | 4 ( 0.1%)              |
| ANTIHEMORRHOIDS FOR TOPICAL USE              | 4 ( 0.3%)              | 0                      | 4 ( 0.1%)              |
| ANTIMIGRAINE PREPARATIONS                    | 2 ( 0.1%)              | 2 ( 0.1%)              | 4 ( 0.1%)              |
| BENZONATATE                                  | 3 ( 0.2%)              | 1 ( <0.1%)             | 4 ( 0.1%)              |
| BETAHISTINE HYDROCHLORIDE                    | 3 ( 0.2%)              | 1 ( <0.1%)             | 4 ( 0.1%)              |
| BISACODYL                                    | 3 ( 0.2%)              | 1 ( <0.1%)             | 4 ( 0.1%)              |
| CALCIUM PANTOTHENATE                         | 0                      | 4 ( 0.3%)              | 4 ( 0.1%)              |
| CALCIUM PHOSPHATE                            | 2 ( 0.1%)              | 2 ( 0.1%)              | 4 ( 0.1%)              |
| CAMPHOR                                      | 2 ( 0.1%)              | 2 ( 0.1%)              | 4 ( 0.1%)              |
| CARBOMER                                     | 3 ( 0.2%)              | 1 ( <0.1%)             | 4 ( 0.1%)              |
| CEFAZOLIN                                    | 1 ( <0.1%)             | 3 ( 0.2%)              | 4 ( 0.1%)              |
| CEFIXIME                                     | 3 ( 0.2%)              | 1 ( <0.1%)             | 4 ( 0.1%)              |
| CHLORDIAZEPOXIDE                             | 2 ( 0.1%)              | 2 ( 0.1%)              | 4 ( 0.1%)              |
| CHLORHEXIDINE GLUCONATE                      | 2 ( 0.1%)              | 2 ( 0.1%)              | 4 ( 0.1%)              |
| CHONDROITIN                                  | 0                      | 4 ( 0.3%)              | 4 ( 0.1%)              |
| DALTEPARIN SODIUM                            | 2 ( 0.1%)              | 2 ( 0.1%)              | 4 ( 0.1%)              |
| DESONIDE                                     | 2 ( 0.1%)              | 2 ( 0.1%)              | 4 ( 0.1%)              |

**Table 14.1.1 / 38: Number of subjects who took at least one concomitant medication (FAS)**

| Substance                                    | LCS12<br>N=1432 (100%) | LCS16<br>N=1452 (100%) | Total<br>N=2884 (100%) |
|----------------------------------------------|------------------------|------------------------|------------------------|
| DEXAMFETAMINE                                | 2 ( 0.1%)              | 2 ( 0.1%)              | 4 ( 0.1%)              |
| DICLOFENAC DIETHYLAMINE                      | 0                      | 4 ( 0.3%)              | 4 ( 0.1%)              |
| DICYCLOVERINE HYDROCHLORIDE                  | 2 ( 0.1%)              | 2 ( 0.1%)              | 4 ( 0.1%)              |
| DOMPERIDONE                                  | 3 ( 0.2%)              | 1 (<0.1%)              | 4 ( 0.1%)              |
| DROTAVERINE HYDROCHLORIDE                    | 2 ( 0.1%)              | 2 ( 0.1%)              | 4 ( 0.1%)              |
| FENTICONAZOLE NITRATE                        | 1 (<0.1%)              | 3 ( 0.2%)              | 4 ( 0.1%)              |
| FLUCLOXACILLIN SODIUM                        | 1 (<0.1%)              | 3 ( 0.2%)              | 4 ( 0.1%)              |
| FLURBIPROFEN                                 | 1 (<0.1%)              | 3 ( 0.2%)              | 4 ( 0.1%)              |
| GENTAMICIN SULFATE                           | 1 (<0.1%)              | 3 ( 0.2%)              | 4 ( 0.1%)              |
| GYNECOLOGICAL ANTIINFECTIVES AND ANTISEPTICS | 1 (<0.1%)              | 3 ( 0.2%)              | 4 ( 0.1%)              |
| HOMEOPATIC PREPARATION                       | 2 ( 0.1%)              | 2 ( 0.1%)              | 4 ( 0.1%)              |
| HYDROQUINONE                                 | 3 ( 0.2%)              | 1 (<0.1%)              | 4 ( 0.1%)              |
| INSULIN LISPRO                               | 2 ( 0.1%)              | 2 ( 0.1%)              | 4 ( 0.1%)              |
| KETAMINE                                     | 4 ( 0.3%)              | 0                      | 4 ( 0.1%)              |
| KETOBEMIDONE HYDROCHLORIDE                   | 4 ( 0.3%)              | 0                      | 4 ( 0.1%)              |
| LINUM USITATISSIMUM SEED OIL                 | 3 ( 0.2%)              | 1 (<0.1%)              | 4 ( 0.1%)              |
| LOPERAMIDE                                   | 3 ( 0.2%)              | 1 (<0.1%)              | 4 ( 0.1%)              |
| MACROCYSTIS PYRIFERA                         | 2 ( 0.1%)              | 2 ( 0.1%)              | 4 ( 0.1%)              |
| MAGNESIUM CARBONATE                          | 1 (<0.1%)              | 3 ( 0.2%)              | 4 ( 0.1%)              |
| MENTHOL                                      | 2 ( 0.1%)              | 2 ( 0.1%)              | 4 ( 0.1%)              |
| METHENAMINE                                  | 1 (<0.1%)              | 3 ( 0.2%)              | 4 ( 0.1%)              |
| NALBUPHINE                                   | 3 ( 0.2%)              | 1 (<0.1%)              | 4 ( 0.1%)              |
| NORTRIPTYLINE                                | 1 (<0.1%)              | 3 ( 0.2%)              | 4 ( 0.1%)              |
| OENOTHERA BIENNIS OIL                        | 1 (<0.1%)              | 3 ( 0.2%)              | 4 ( 0.1%)              |
| ORLISTAT                                     | 3 ( 0.2%)              | 1 (<0.1%)              | 4 ( 0.1%)              |
| PHENOBARBITAL                                | 2 ( 0.1%)              | 2 ( 0.1%)              | 4 ( 0.1%)              |
| PREDNISOLONE CAPROATE                        | 3 ( 0.2%)              | 1 (<0.1%)              | 4 ( 0.1%)              |
| PROCHLORPERAZINE EDISYLATE                   | 2 ( 0.1%)              | 2 ( 0.1%)              | 4 ( 0.1%)              |
| PROPYLTHIOURACIL                             | 2 ( 0.1%)              | 2 ( 0.1%)              | 4 ( 0.1%)              |
| PROPYPHENAZONE                               | 2 ( 0.1%)              | 2 ( 0.1%)              | 4 ( 0.1%)              |
| RAMIPRIL                                     | 1 (<0.1%)              | 3 ( 0.2%)              | 4 ( 0.1%)              |
| RESORCINOL                                   | 3 ( 0.2%)              | 1 (<0.1%)              | 4 ( 0.1%)              |
| SENNOSIDE A+B                                | 0                      | 4 ( 0.3%)              | 4 ( 0.1%)              |
| SERRAPEPTASE                                 | 2 ( 0.1%)              | 2 ( 0.1%)              | 4 ( 0.1%)              |
| SEVOFLURANE                                  | 3 ( 0.2%)              | 1 (<0.1%)              | 4 ( 0.1%)              |
| SILVER NITRATE                               | 2 ( 0.1%)              | 2 ( 0.1%)              | 4 ( 0.1%)              |
| SODIUM PHOSPHATE DIBASIC                     | 1 (<0.1%)              | 3 ( 0.2%)              | 4 ( 0.1%)              |
| SULFASALAZINE                                | 2 ( 0.1%)              | 2 ( 0.1%)              | 4 ( 0.1%)              |
| SUMATRIPTAN SUCCINATE                        | 1 (<0.1%)              | 3 ( 0.2%)              | 4 ( 0.1%)              |
| TETANUS TOXOID                               | 1 (<0.1%)              | 3 ( 0.2%)              | 4 ( 0.1%)              |
| TOLPERISONE HYDROCHLORIDE                    | 3 ( 0.2%)              | 1 (<0.1%)              | 4 ( 0.1%)              |
| TRICHLOROACETIC ACID                         | 4 ( 0.3%)              | 0                      | 4 ( 0.1%)              |
| TRIMEBUTINE                                  | 3 ( 0.2%)              | 1 (<0.1%)              | 4 ( 0.1%)              |
| VACCINIUM MACROCARPON                        | 0                      | 4 ( 0.3%)              | 4 ( 0.1%)              |
| VERAPAMIL                                    | 3 ( 0.2%)              | 1 (<0.1%)              | 4 ( 0.1%)              |

**Table 14.1.1 / 38: Number of subjects who took at least one concomitant medication (FAS)**

| Substance                                         | LCS12<br>N=1432 (100%) | LCS16<br>N=1452 (100%) | Total<br>N=2884 (100%) |
|---------------------------------------------------|------------------------|------------------------|------------------------|
| VITAMIN B12 NOS                                   | 0                      | 4 ( 0.3%)              | 4 ( 0.1%)              |
| ACECLOFENAC                                       | 2 ( 0.1%)              | 1 (<0.1%)              | 3 ( 0.1%)              |
| ALFENTANIL HYDROCHLORIDE                          | 2 ( 0.1%)              | 1 (<0.1%)              | 3 ( 0.1%)              |
| AMBROXOL                                          | 3 ( 0.2%)              | 0                      | 3 ( 0.1%)              |
| AMILORIDE HYDROCHLORIDE                           | 2 ( 0.1%)              | 1 (<0.1%)              | 3 ( 0.1%)              |
| ANALGESICS                                        | 1 (<0.1%)              | 2 ( 0.1%)              | 3 ( 0.1%)              |
| ANTIFUNGALS                                       | 2 ( 0.1%)              | 1 (<0.1%)              | 3 ( 0.1%)              |
| ANTI-HISTAMINES                                   | 1 (<0.1%)              | 2 ( 0.1%)              | 3 ( 0.1%)              |
| ANTI-INFLAM. AGENTS AND ANTI-INFECTION. OPTHALMIC | 2 ( 0.1%)              | 1 (<0.1%)              | 3 ( 0.1%)              |
| ARTICAIN HYDROCHLORIDE                            | 2 ( 0.1%)              | 1 (<0.1%)              | 3 ( 0.1%)              |
| BACITRACIN ZINC                                   | 1 (<0.1%)              | 2 ( 0.1%)              | 3 ( 0.1%)              |
| BENZATHINE BENZYL-PENICILLIN                      | 3 ( 0.2%)              | 0                      | 3 ( 0.1%)              |
| BISOPROLOL FUMARATE                               | 3 ( 0.2%)              | 0                      | 3 ( 0.1%)              |
| BORIC ACID                                        | 1 (<0.1%)              | 2 ( 0.1%)              | 3 ( 0.1%)              |
| BOTULINUM TOXIN TYPE A                            | 0                      | 3 ( 0.2%)              | 3 ( 0.1%)              |
| BUSPIRONE                                         | 2 ( 0.1%)              | 1 (<0.1%)              | 3 ( 0.1%)              |
| CALCIPOTRIOL                                      | 1 (<0.1%)              | 2 ( 0.1%)              | 3 ( 0.1%)              |
| CALCIUM CITRATE                                   | 1 (<0.1%)              | 2 ( 0.1%)              | 3 ( 0.1%)              |
| CALCIUM SODIUM LACTATE                            | 1 (<0.1%)              | 2 ( 0.1%)              | 3 ( 0.1%)              |
| CANDESARTAN CILEXETIL                             | 1 (<0.1%)              | 2 ( 0.1%)              | 3 ( 0.1%)              |
| CEFDINIR                                          | 2 ( 0.1%)              | 1 (<0.1%)              | 3 ( 0.1%)              |
| CHLORDIAZEPOXIDE HYDROCHLORIDE                    | 1 (<0.1%)              | 2 ( 0.1%)              | 3 ( 0.1%)              |
| CHLORMEZANONE                                     | 2 ( 0.1%)              | 1 (<0.1%)              | 3 ( 0.1%)              |
| CHROMIUM                                          | 2 ( 0.1%)              | 1 (<0.1%)              | 3 ( 0.1%)              |
| CINEOLE                                           | 1 (<0.1%)              | 2 ( 0.1%)              | 3 ( 0.1%)              |
| CORTICOSTEROIDS, DERMATOLOGICAL PREPARATIONS      | 2 ( 0.1%)              | 1 (<0.1%)              | 3 ( 0.1%)              |
| CYAMOPSIS TETRAGONOLOBA GUM                       | 1 (<0.1%)              | 2 ( 0.1%)              | 3 ( 0.1%)              |
| DESFLURANE                                        | 1 (<0.1%)              | 2 ( 0.1%)              | 3 ( 0.1%)              |
| DEXIBUPROFEN                                      | 2 ( 0.1%)              | 1 (<0.1%)              | 3 ( 0.1%)              |
| DEXTROMETHORPHAN                                  | 1 (<0.1%)              | 2 ( 0.1%)              | 3 ( 0.1%)              |
| DIMETHYL-3,3-DIPHENYL-1-METHYLALLYLAMINE HCL      | 3 ( 0.2%)              | 0                      | 3 ( 0.1%)              |
| DIPHTheria Toxoid                                 | 0                      | 3 ( 0.2%)              | 3 ( 0.1%)              |
| DRIMIA MARITIMA SYRUP                             | 1 (<0.1%)              | 2 ( 0.1%)              | 3 ( 0.1%)              |
| DRUGS FOR FUNCTIONAL GASTROINTEST. DISORDERS      | 1 (<0.1%)              | 2 ( 0.1%)              | 3 ( 0.1%)              |
| ENALAPRIL MALEATE                                 | 2 ( 0.1%)              | 1 (<0.1%)              | 3 ( 0.1%)              |
| EPINEPHRINE BITARTRATE                            | 2 ( 0.1%)              | 1 (<0.1%)              | 3 ( 0.1%)              |
| ERDOSTEINE                                        | 1 (<0.1%)              | 2 ( 0.1%)              | 3 ( 0.1%)              |
| EUPHORBIA HIRTA                                   | 1 (<0.1%)              | 2 ( 0.1%)              | 3 ( 0.1%)              |
| FLUCLOXACILLIN                                    | 2 ( 0.1%)              | 1 (<0.1%)              | 3 ( 0.1%)              |
| FLUCINOLONE ACETONIDE                             | 1 (<0.1%)              | 2 ( 0.1%)              | 3 ( 0.1%)              |
| FRANGULIN                                         | 1 (<0.1%)              | 2 ( 0.1%)              | 3 ( 0.1%)              |
| FROVATRIPTAN SUCCINATE MONOHYDRATE                | 0                      | 3 ( 0.2%)              | 3 ( 0.1%)              |
| FUROSEMIDE                                        | 0                      | 3 ( 0.2%)              | 3 ( 0.1%)              |
| GLUCOCORTICIDS                                    | 1 (<0.1%)              | 2 ( 0.1%)              | 3 ( 0.1%)              |
| GLUCOSAMINE SULFATE                               | 0                      | 3 ( 0.2%)              | 3 ( 0.1%)              |

**Table 14.1.1 / 38: Number of subjects who took at least one concomitant medication (FAS)**

| Substance                           | LCS12<br>N=1432 (100%) | LCS16<br>N=1452 (100%) | Total<br>N=2884 (100%) |
|-------------------------------------|------------------------|------------------------|------------------------|
| GRANISETRON                         | 2 ( 0.1%)              | 1 (<0.1%)              | 3 ( 0.1%)              |
| GUAREA GUIDONIA LIQUID EXTRACT      | 1 (<0.1%)              | 2 ( 0.1%)              | 3 ( 0.1%)              |
| HEPARIN                             | 1 (<0.1%)              | 2 ( 0.1%)              | 3 ( 0.1%)              |
| HYOSCINE                            | 2 ( 0.1%)              | 1 (<0.1%)              | 3 ( 0.1%)              |
| HYPNOTICS AND SEDATIVES             | 2 ( 0.1%)              | 1 (<0.1%)              | 3 ( 0.1%)              |
| INDOMETACIN                         | 2 ( 0.1%)              | 1 (<0.1%)              | 3 ( 0.1%)              |
| IPRATROPIUM BROMIDE                 | 1 (<0.1%)              | 2 ( 0.1%)              | 3 ( 0.1%)              |
| ISOCONAZOLE NITRATE                 | 2 ( 0.1%)              | 1 (<0.1%)              | 3 ( 0.1%)              |
| LACTUCA VIROSA EXTRACT              | 1 (<0.1%)              | 2 ( 0.1%)              | 3 ( 0.1%)              |
| LEVOCABASTINE HYDROCHLORIDE         | 2 ( 0.1%)              | 1 (<0.1%)              | 3 ( 0.1%)              |
| LEVOCETIRIZINE                      | 0                      | 3 ( 0.2%)              | 3 ( 0.1%)              |
| LIOTHYRONINE SODIUM                 | 1 (<0.1%)              | 2 ( 0.1%)              | 3 ( 0.1%)              |
| LOSARTAN                            | 2 ( 0.1%)              | 1 (<0.1%)              | 3 ( 0.1%)              |
| LUBIPROSTONE                        | 1 (<0.1%)              | 2 ( 0.1%)              | 3 ( 0.1%)              |
| MAGNESIUM OXIDE                     | 1 (<0.1%)              | 2 ( 0.1%)              | 3 ( 0.1%)              |
| MEPREDNISONE                        | 1 (<0.1%)              | 2 ( 0.1%)              | 3 ( 0.1%)              |
| METHYLPREDNISOLONE ACETATE          | 2 ( 0.1%)              | 1 (<0.1%)              | 3 ( 0.1%)              |
| METHYLPREDNISOLONE SODIUM SUCCINATE | 2 ( 0.1%)              | 1 (<0.1%)              | 3 ( 0.1%)              |
| METOPROLOL TARTRATE                 | 1 (<0.1%)              | 2 ( 0.1%)              | 3 ( 0.1%)              |
| NEOMYCIN                            | 2 ( 0.1%)              | 1 (<0.1%)              | 3 ( 0.1%)              |
| NEOSTIGMINE METILSULFATE            | 1 (<0.1%)              | 2 ( 0.1%)              | 3 ( 0.1%)              |
| OTHER COLD COMBINATION PREPARATIONS | 3 ( 0.2%)              | 0                      | 3 ( 0.1%)              |
| OXITRIPTAN                          | 2 ( 0.1%)              | 1 (<0.1%)              | 3 ( 0.1%)              |
| PAPAVERINE HYDROCHLORIDE            | 2 ( 0.1%)              | 1 (<0.1%)              | 3 ( 0.1%)              |
| PARAFFIN                            | 0                      | 3 ( 0.2%)              | 3 ( 0.1%)              |
| PHENOL                              | 2 ( 0.1%)              | 1 (<0.1%)              | 3 ( 0.1%)              |
| PHENOXYMETHYLPENICILLIN             | 1 (<0.1%)              | 2 ( 0.1%)              | 3 ( 0.1%)              |
| PHENTERMINE HYDROCHLORIDE           | 1 (<0.1%)              | 2 ( 0.1%)              | 3 ( 0.1%)              |
| POLIOMYELITIS VACCINE               | 1 (<0.1%)              | 2 ( 0.1%)              | 3 ( 0.1%)              |
| POLYSORBATE 20                      | 0                      | 3 ( 0.2%)              | 3 ( 0.1%)              |
| PRAMOCAINE HYDROCHLORIDE            | 0                      | 3 ( 0.2%)              | 3 ( 0.1%)              |
| PROCAINE HYDROCHLORIDE              | 1 (<0.1%)              | 2 ( 0.1%)              | 3 ( 0.1%)              |
| PROPIOMAZINE MALEATE                | 3 ( 0.2%)              | 0                      | 3 ( 0.1%)              |
| PYRIDOXINE                          | 2 ( 0.1%)              | 1 (<0.1%)              | 3 ( 0.1%)              |
| RABIES VACCINE                      | 1 (<0.1%)              | 2 ( 0.1%)              | 3 ( 0.1%)              |
| RISPERIDONE                         | 0                      | 3 ( 0.2%)              | 3 ( 0.1%)              |
| ROCURONIUM                          | 3 ( 0.2%)              | 0                      | 3 ( 0.1%)              |
| ROPIVACAINE HYDROCHLORIDE           | 1 (<0.1%)              | 2 ( 0.1%)              | 3 ( 0.1%)              |
| SACCHAROMYCES BOULARDII             | 3 ( 0.2%)              | 0                      | 3 ( 0.1%)              |
| SECNIDAZOLE                         | 2 ( 0.1%)              | 1 (<0.1%)              | 3 ( 0.1%)              |
| SERTACONAZOLE NITRATE               | 2 ( 0.1%)              | 1 (<0.1%)              | 3 ( 0.1%)              |
| SERTRALINE HYDROCHLORIDE            | 2 ( 0.1%)              | 1 (<0.1%)              | 3 ( 0.1%)              |
| SIMVASTATIN                         | 1 (<0.1%)              | 2 ( 0.1%)              | 3 ( 0.1%)              |
| SODIUM CITRATE                      | 1 (<0.1%)              | 2 ( 0.1%)              | 3 ( 0.1%)              |
| SODIUM PHOSPHATE MONOBASIC          | 1 (<0.1%)              | 2 ( 0.1%)              | 3 ( 0.1%)              |



**Table 14.1.1 / 38: Number of subjects who took at least one concomitant medication (FAS)**

| Substance                             | LCS12<br>N=1432 (100%) | LCS16<br>N=1452 (100%) | Total<br>N=2884 (100%) |
|---------------------------------------|------------------------|------------------------|------------------------|
| SUFENTANIL                            | 1 (<0.1%)              | 2 ( 0.1%)              | 3 ( 0.1%)              |
| SULBACTAM                             | 2 ( 0.1%)              | 1 (<0.1%)              | 3 ( 0.1%)              |
| SULFADIAZINE SILVER                   | 0                      | 3 ( 0.2%)              | 3 ( 0.1%)              |
| TESTOSTERONE                          | 2 ( 0.1%)              | 1 (<0.1%)              | 3 ( 0.1%)              |
| THIAMINE                              | 2 ( 0.1%)              | 1 (<0.1%)              | 3 ( 0.1%)              |
| THIOCTIC ACID                         | 2 ( 0.1%)              | 1 (<0.1%)              | 3 ( 0.1%)              |
| TRAZODONE HYDROCHLORIDE               | 1 (<0.1%)              | 2 ( 0.1%)              | 3 ( 0.1%)              |
| TRIAMCINOLONE                         | 2 ( 0.1%)              | 1 (<0.1%)              | 3 ( 0.1%)              |
| TRIMEBUTINE MALEATE                   | 2 ( 0.1%)              | 1 (<0.1%)              | 3 ( 0.1%)              |
| VACCINES                              | 2 ( 0.1%)              | 1 (<0.1%)              | 3 ( 0.1%)              |
| VALPROATE SEMISODIUM                  | 1 (<0.1%)              | 2 ( 0.1%)              | 3 ( 0.1%)              |
| VALPROATE SODIUM                      | 3 ( 0.2%)              | 0                      | 3 ( 0.1%)              |
| VITAMINS WITH MINERALS                | 0                      | 3 ( 0.2%)              | 3 ( 0.1%)              |
| ADIPHENINE                            | 2 ( 0.1%)              | 0                      | 2 (<0.1%)              |
| ALIMEMAZINE TARTRATE                  | 2 ( 0.1%)              | 0                      | 2 (<0.1%)              |
| ALIMENTARY TRACT AND METABOLISM       | 0                      | 2 ( 0.1%)              | 2 (<0.1%)              |
| ALLIUM SATIVUM                        | 2 ( 0.1%)              | 0                      | 2 (<0.1%)              |
| ALOE VERA                             | 2 ( 0.1%)              | 0                      | 2 (<0.1%)              |
| AMCINONIDE                            | 2 ( 0.1%)              | 0                      | 2 (<0.1%)              |
| AMFEPRAMONE HYDROCHLORIDE             | 1 (<0.1%)              | 1 (<0.1%)              | 2 (<0.1%)              |
| AMINOSALICYLIC ACID                   | 2 ( 0.1%)              | 0                      | 2 (<0.1%)              |
| AMMONIUM CHLORIDE                     | 2 ( 0.1%)              | 0                      | 2 (<0.1%)              |
| ANTACIDS                              | 2 ( 0.1%)              | 0                      | 2 (<0.1%)              |
| ANTIBIOTICS FOR TOPICAL USE           | 0                      | 2 ( 0.1%)              | 2 (<0.1%)              |
| ARTICAINE                             | 1 (<0.1%)              | 1 (<0.1%)              | 2 (<0.1%)              |
| ATOMOXETINE HYDROCHLORIDE             | 1 (<0.1%)              | 1 (<0.1%)              | 2 (<0.1%)              |
| ATROPINE                              | 2 ( 0.1%)              | 0                      | 2 (<0.1%)              |
| AZATHIOPRINE                          | 1 (<0.1%)              | 1 (<0.1%)              | 2 (<0.1%)              |
| AZELASTINE                            | 1 (<0.1%)              | 1 (<0.1%)              | 2 (<0.1%)              |
| BENZALKONIUM CHLORIDE                 | 0                      | 2 ( 0.1%)              | 2 (<0.1%)              |
| BENZOIC ACID                          | 0                      | 2 ( 0.1%)              | 2 (<0.1%)              |
| BETACAROTENE                          | 0                      | 2 ( 0.1%)              | 2 (<0.1%)              |
| BROMELAINS                            | 1 (<0.1%)              | 1 (<0.1%)              | 2 (<0.1%)              |
| BROMPHENIRAMINE MALEATE               | 1 (<0.1%)              | 1 (<0.1%)              | 2 (<0.1%)              |
| CALCIUM AMINO ACID CHELATE            | 0                      | 2 ( 0.1%)              | 2 (<0.1%)              |
| CALCIUM GLUCONATE                     | 2 ( 0.1%)              | 0                      | 2 (<0.1%)              |
| CAMELLIA SINENSIS                     | 2 ( 0.1%)              | 0                      | 2 (<0.1%)              |
| CAPTOPRIL                             | 0                      | 2 ( 0.1%)              | 2 (<0.1%)              |
| CARBASALATE CALCIUM                   | 1 (<0.1%)              | 1 (<0.1%)              | 2 (<0.1%)              |
| CEFATRIZINE PROPYLENGLYCOLATE SULFATE | 1 (<0.1%)              | 1 (<0.1%)              | 2 (<0.1%)              |
| CEFOXITIN                             | 0                      | 2 ( 0.1%)              | 2 (<0.1%)              |
| CEFUROXIME AXETIL                     | 0                      | 2 ( 0.1%)              | 2 (<0.1%)              |
| CETYLPYRIDINIUM CHLORIDE              | 1 (<0.1%)              | 1 (<0.1%)              | 2 (<0.1%)              |
| CHARCOAL, ACTIVATED                   | 1 (<0.1%)              | 1 (<0.1%)              | 2 (<0.1%)              |
| CHLOROPYRAMINE HYDROCHLORIDE          | 2 ( 0.1%)              | 0                      | 2 (<0.1%)              |

**Table 14.1.1 / 38: Number of subjects who took at least one concomitant medication (FAS)**

| Substance                                | LCS12<br>N=1432 (100%) | LCS16<br>N=1452 (100%) | Total<br>N=2884 (100%) |
|------------------------------------------|------------------------|------------------------|------------------------|
| CHLOROQUINE PHOSPHATE                    | 1 (<0.1%)              | 1 (<0.1%)              | 2 (<0.1%)              |
| CHROMIUM AMINO ACID CHELATE              | 0                      | 2 ( 0.1%)              | 2 (<0.1%)              |
| CICLESONIDE                              | 1 (<0.1%)              | 1 (<0.1%)              | 2 (<0.1%)              |
| CITRIC ACID                              | 1 (<0.1%)              | 1 (<0.1%)              | 2 (<0.1%)              |
| CLIDINIUM BROMIDE                        | 0                      | 2 ( 0.1%)              | 2 (<0.1%)              |
| CLOBETASOL                               | 1 (<0.1%)              | 1 (<0.1%)              | 2 (<0.1%)              |
| CLOBETASONE BUTYRATE                     | 0                      | 2 ( 0.1%)              | 2 (<0.1%)              |
| CLOFEDANOL                               | 2 ( 0.1%)              | 0                      | 2 (<0.1%)              |
| CLONIDINE                                | 1 (<0.1%)              | 1 (<0.1%)              | 2 (<0.1%)              |
| COD-LIVER OIL                            | 1 (<0.1%)              | 1 (<0.1%)              | 2 (<0.1%)              |
| COLESTYRAMINE                            | 1 (<0.1%)              | 1 (<0.1%)              | 2 (<0.1%)              |
| COPPER AMINO ACID CHELATE                | 0                      | 2 ( 0.1%)              | 2 (<0.1%)              |
| COSMETICS                                | 1 (<0.1%)              | 1 (<0.1%)              | 2 (<0.1%)              |
| DERMATOLOGICALS                          | 2 ( 0.1%)              | 0                      | 2 (<0.1%)              |
| DESOXIMETASONE                           | 1 (<0.1%)              | 1 (<0.1%)              | 2 (<0.1%)              |
| DEXCHLORPHENIRAMINE MALEATE              | 2 ( 0.1%)              | 0                      | 2 (<0.1%)              |
| DESKETOPROFEN TROMETAMOL                 | 0                      | 2 ( 0.1%)              | 2 (<0.1%)              |
| DEXTROPROPOXYPHENE HYDROCHLORIDE         | 0                      | 2 ( 0.1%)              | 2 (<0.1%)              |
| DICHLOROBENZYL ALCOHOL                   | 1 (<0.1%)              | 1 (<0.1%)              | 2 (<0.1%)              |
| DIFLUCORTOLONE VALERATE                  | 2 ( 0.1%)              | 0                      | 2 (<0.1%)              |
| DILTIAZEM                                | 1 (<0.1%)              | 1 (<0.1%)              | 2 (<0.1%)              |
| DOCOSANOL                                | 0                      | 2 ( 0.1%)              | 2 (<0.1%)              |
| DROPERIDOL                               | 0                      | 2 ( 0.1%)              | 2 (<0.1%)              |
| DROPERIDOL LACTATE                       | 1 (<0.1%)              | 1 (<0.1%)              | 2 (<0.1%)              |
| ECHINACEA PURPUREA                       | 1 (<0.1%)              | 1 (<0.1%)              | 2 (<0.1%)              |
| ELETRIPTAN HYDROBROMIDE                  | 1 (<0.1%)              | 1 (<0.1%)              | 2 (<0.1%)              |
| EQUISETUM ARVENSE STEM                   | 0                      | 2 ( 0.1%)              | 2 (<0.1%)              |
| ESOMEPRAZOLE                             | 0                      | 2 ( 0.1%)              | 2 (<0.1%)              |
| ESTRADIOL CIPIONATE                      | 1 (<0.1%)              | 1 (<0.1%)              | 2 (<0.1%)              |
| ETODOLAC                                 | 0                      | 2 ( 0.1%)              | 2 (<0.1%)              |
| EXENATIDE                                | 2 ( 0.1%)              | 0                      | 2 (<0.1%)              |
| FENOVERINE                               | 1 (<0.1%)              | 1 (<0.1%)              | 2 (<0.1%)              |
| FENTANYL CITRATE                         | 1 (<0.1%)              | 1 (<0.1%)              | 2 (<0.1%)              |
| FLUOCINONIDE                             | 1 (<0.1%)              | 1 (<0.1%)              | 2 (<0.1%)              |
| FLUPENTIXOL DIHYDROCHLORIDE              | 1 (<0.1%)              | 1 (<0.1%)              | 2 (<0.1%)              |
| FRAMYCETIN SULFATE                       | 2 ( 0.1%)              | 0                      | 2 (<0.1%)              |
| GLYCEROL                                 | 0                      | 2 ( 0.1%)              | 2 (<0.1%)              |
| HALOPERIDOL                              | 0                      | 2 ( 0.1%)              | 2 (<0.1%)              |
| HAMAMELIS VIRGINIANA                     | 1 (<0.1%)              | 1 (<0.1%)              | 2 (<0.1%)              |
| HEPARIN SODIUM                           | 1 (<0.1%)              | 1 (<0.1%)              | 2 (<0.1%)              |
| HERBAL EXTRACT NOS                       | 1 (<0.1%)              | 1 (<0.1%)              | 2 (<0.1%)              |
| HOMEOPATICS NOS                          | 0                      | 2 ( 0.1%)              | 2 (<0.1%)              |
| HORMONAL CONTRACEPTIVES FOR SYSTEMIC USE | 1 (<0.1%)              | 1 (<0.1%)              | 2 (<0.1%)              |
| HYDROMORPHONE                            | 1 (<0.1%)              | 1 (<0.1%)              | 2 (<0.1%)              |
| HYDROXYCHLOROQUINE PHOSPHATE             | 0                      | 2 ( 0.1%)              | 2 (<0.1%)              |

**Table 14.1.1 / 38: Number of subjects who took at least one concomitant medication (FAS)**

| Substance                                     | LCS12<br>N=1432 (100%) | LCS16<br>N=1452 (100%) | Total<br>N=2884 (100%) |
|-----------------------------------------------|------------------------|------------------------|------------------------|
| HYDROXYCHLOROQUINE SULFATE                    | 1 (<0.1%)              | 1 (<0.1%)              | 2 (<0.1%)              |
| HYOSCINE HYDROBROMIDE                         | 0                      | 2 ( 0.1%)              | 2 (<0.1%)              |
| HYPROMELLOSE                                  | 0                      | 2 ( 0.1%)              | 2 (<0.1%)              |
| I.V. SOLUTIONS                                | 1 (<0.1%)              | 1 (<0.1%)              | 2 (<0.1%)              |
| IOHEXOL                                       | 2 ( 0.1%)              | 0                      | 2 (<0.1%)              |
| IRON IN OTHER COMBINATIONS                    | 0                      | 2 ( 0.1%)              | 2 (<0.1%)              |
| ISOCONAZOLE                                   | 0                      | 2 ( 0.1%)              | 2 (<0.1%)              |
| KETOTIFEN FUMARATE                            | 0                      | 2 ( 0.1%)              | 2 (<0.1%)              |
| LAMINARIA DIGITATA POWDER                     | 0                      | 2 ( 0.1%)              | 2 (<0.1%)              |
| LEVETIRACETAM                                 | 0                      | 2 ( 0.1%)              | 2 (<0.1%)              |
| LYNESTRENOL                                   | 1 (<0.1%)              | 1 (<0.1%)              | 2 (<0.1%)              |
| LYSINE                                        | 1 (<0.1%)              | 1 (<0.1%)              | 2 (<0.1%)              |
| MANGANESE AMINO ACID CHELATE                  | 0                      | 2 ( 0.1%)              | 2 (<0.1%)              |
| MEBENDAZOLE                                   | 0                      | 2 ( 0.1%)              | 2 (<0.1%)              |
| MECLOFENAMATE SODIUM                          | 1 (<0.1%)              | 1 (<0.1%)              | 2 (<0.1%)              |
| MEDAZEPAM                                     | 2 ( 0.1%)              | 0                      | 2 (<0.1%)              |
| MELALEUCA ALTERNIFOLIA OIL                    | 1 (<0.1%)              | 1 (<0.1%)              | 2 (<0.1%)              |
| MENINGOCOCCAL VACCINES                        | 1 (<0.1%)              | 1 (<0.1%)              | 2 (<0.1%)              |
| MERCAPTOPYRINE                                | 1 (<0.1%)              | 1 (<0.1%)              | 2 (<0.1%)              |
| METHYLSULFONYLMETHANE                         | 0                      | 2 ( 0.1%)              | 2 (<0.1%)              |
| METHYLTHIONINIUM CHLORIDE                     | 0                      | 2 ( 0.1%)              | 2 (<0.1%)              |
| METOPROLOL                                    | 1 (<0.1%)              | 1 (<0.1%)              | 2 (<0.1%)              |
| MODAFINIL                                     | 1 (<0.1%)              | 1 (<0.1%)              | 2 (<0.1%)              |
| MOMETASONE                                    | 1 (<0.1%)              | 1 (<0.1%)              | 2 (<0.1%)              |
| MORPHINE SULFATE                              | 2 ( 0.1%)              | 0                      | 2 (<0.1%)              |
| MOXIFLOXACIN                                  | 1 (<0.1%)              | 1 (<0.1%)              | 2 (<0.1%)              |
| MULTIVITAMINS WITH MINERALS [MULTIVITAMINS WI | 2 ( 0.1%)              | 0                      | 2 (<0.1%)              |
| MUPIROCIN                                     | 0                      | 2 ( 0.1%)              | 2 (<0.1%)              |
| NABUMETONE                                    | 1 (<0.1%)              | 1 (<0.1%)              | 2 (<0.1%)              |
| NADROPARIN CALCIUM                            | 2 ( 0.1%)              | 0                      | 2 (<0.1%)              |
| NARATRIPTAN HYDROCHLORIDE                     | 1 (<0.1%)              | 1 (<0.1%)              | 2 (<0.1%)              |
| NEBIVOLOL HYDROCHLORIDE                       | 1 (<0.1%)              | 1 (<0.1%)              | 2 (<0.1%)              |
| NIFEDIPINE                                    | 0                      | 2 ( 0.1%)              | 2 (<0.1%)              |
| NIFLUMIC ACID                                 | 1 (<0.1%)              | 1 (<0.1%)              | 2 (<0.1%)              |
| NIFUROXAZIDE                                  | 0                      | 2 ( 0.1%)              | 2 (<0.1%)              |
| NORGESTREL                                    | 2 ( 0.1%)              | 0                      | 2 (<0.1%)              |
| OCTATROPINE METHYLBROMIDE                     | 1 (<0.1%)              | 1 (<0.1%)              | 2 (<0.1%)              |
| OLOPATADINE                                   | 1 (<0.1%)              | 1 (<0.1%)              | 2 (<0.1%)              |
| OPIOIDS                                       | 2 ( 0.1%)              | 0                      | 2 (<0.1%)              |
| OTHER ANTIPRURITICS                           | 0                      | 2 ( 0.1%)              | 2 (<0.1%)              |
| OTHER EMOLLIENTS AND PROTECTIVES              | 0                      | 2 ( 0.1%)              | 2 (<0.1%)              |
| OTHER OPHTHALMOLOGICALS                       | 0                      | 2 ( 0.1%)              | 2 (<0.1%)              |
| OTHER RESPIRATORY SYSTEM PRODUCTS             | 2 ( 0.1%)              | 0                      | 2 (<0.1%)              |
| OXCARBAZEPINE                                 | 2 ( 0.1%)              | 0                      | 2 (<0.1%)              |
| OXYMETAZOLINE                                 | 1 (<0.1%)              | 1 (<0.1%)              | 2 (<0.1%)              |

**Table 14.1.1 / 38: Number of subjects who took at least one concomitant medication (FAS)**

| Substance                                   | LCS12<br>N=1432 (100%) | LCS16<br>N=1452 (100%) | Total<br>N=2884 (100%) |
|---------------------------------------------|------------------------|------------------------|------------------------|
| OXYTETRACYCLINE HYDROCHLORIDE               | 2 ( 0.1%)              | 0                      | 2 ( <0.1%)             |
| PARGEVERINE HYDROCHLORIDE                   | 1 ( <0.1%)             | 1 ( <0.1%)             | 2 ( <0.1%)             |
| PENCICLOVIR                                 | 0                      | 2 ( 0.1%)              | 2 ( <0.1%)             |
| PETHIDINE                                   | 1 ( <0.1%)             | 1 ( <0.1%)             | 2 ( <0.1%)             |
| PETROLATUM                                  | 0                      | 2 ( 0.1%)              | 2 ( <0.1%)             |
| PHENYL SALICYLATE                           | 0                      | 2 ( 0.1%)              | 2 ( <0.1%)             |
| PHENYLEPHRINE                               | 2 ( 0.1%)              | 0                      | 2 ( <0.1%)             |
| PHENYLPROPANOLAMINE                         | 1 ( <0.1%)             | 1 ( <0.1%)             | 2 ( <0.1%)             |
| PHENYLTOLOXAMINE                            | 1 ( <0.1%)             | 1 ( <0.1%)             | 2 ( <0.1%)             |
| PIROXICAM BETADEx                           | 1 ( <0.1%)             | 1 ( <0.1%)             | 2 ( <0.1%)             |
| PLANTAGO AFRA                               | 2 ( 0.1%)              | 0                      | 2 ( <0.1%)             |
| PNEUMOCOCCAL VACCINE                        | 1 ( <0.1%)             | 1 ( <0.1%)             | 2 ( <0.1%)             |
| POLIOVIRUS VACCINE, INACTIVATED             | 1 ( <0.1%)             | 1 ( <0.1%)             | 2 ( <0.1%)             |
| POLYNOXYLIN                                 | 2 ( 0.1%)              | 0                      | 2 ( <0.1%)             |
| POTASSIUM AMINO ACID CHELATE                | 0                      | 2 ( 0.1%)              | 2 ( <0.1%)             |
| POTASSIUM IODIDE                            | 2 ( 0.1%)              | 0                      | 2 ( <0.1%)             |
| PRAMIPEXOLE DIHYDROCHLORIDE                 | 2 ( 0.1%)              | 0                      | 2 ( <0.1%)             |
| PRASTERONE                                  | 1 ( <0.1%)             | 1 ( <0.1%)             | 2 ( <0.1%)             |
| PROMESTRIENE                                | 2 ( 0.1%)              | 0                      | 2 ( <0.1%)             |
| PROPOXYPHENE                                | 1 ( <0.1%)             | 1 ( <0.1%)             | 2 ( <0.1%)             |
| QUILLAJA SAPONARIA BARK EXTRACT             | 2 ( 0.1%)              | 0                      | 2 ( <0.1%)             |
| RAMELTEON                                   | 1 ( <0.1%)             | 1 ( <0.1%)             | 2 ( <0.1%)             |
| SALICYLIC ACID AND DERIVATIVES              | 0                      | 2 ( 0.1%)              | 2 ( <0.1%)             |
| SELENIUM AMINO ACID CHELATE                 | 0                      | 2 ( 0.1%)              | 2 ( <0.1%)             |
| SILYBUM MARIANUM                            | 2 ( 0.1%)              | 0                      | 2 ( <0.1%)             |
| SODIUM CITRATE ACID                         | 1 ( <0.1%)             | 1 ( <0.1%)             | 2 ( <0.1%)             |
| SOLIFENACIN SUCCINATE                       | 0                      | 2 ( 0.1%)              | 2 ( <0.1%)             |
| TAMSULOSIN HYDROCHLORIDE                    | 1 ( <0.1%)             | 1 ( <0.1%)             | 2 ( <0.1%)             |
| TBE VIRUS ANTIGEN                           | 0                      | 2 ( 0.1%)              | 2 ( <0.1%)             |
| TELITHROMYCIN                               | 1 ( <0.1%)             | 1 ( <0.1%)             | 2 ( <0.1%)             |
| TERBINAFINE HYDROCHLORIDE                   | 0                      | 2 ( 0.1%)              | 2 ( <0.1%)             |
| THIAMINE MONONITRATE                        | 0                      | 2 ( 0.1%)              | 2 ( <0.1%)             |
| THIETHYLPERAZINE MALEATE                    | 2 ( 0.1%)              | 0                      | 2 ( <0.1%)             |
| TILACTASE                                   | 2 ( 0.1%)              | 0                      | 2 ( <0.1%)             |
| TIZANIDINE                                  | 2 ( 0.1%)              | 0                      | 2 ( <0.1%)             |
| TOLNAFTATE                                  | 0                      | 2 ( 0.1%)              | 2 ( <0.1%)             |
| VALACICLOVIR                                | 1 ( <0.1%)             | 1 ( <0.1%)             | 2 ( <0.1%)             |
| VALERIANA OFFICINALIS                       | 1 ( <0.1%)             | 1 ( <0.1%)             | 2 ( <0.1%)             |
| VALSARTAN                                   | 2 ( 0.1%)              | 0                      | 2 ( <0.1%)             |
| VANCOMYCIN                                  | 1 ( <0.1%)             | 1 ( <0.1%)             | 2 ( <0.1%)             |
| ZINC AMINO ACID CHELATE                     | 0                      | 2 ( 0.1%)              | 2 ( <0.1%)             |
| ZIPRASIDONE HYDROCHLORIDE                   | 0                      | 2 ( 0.1%)              | 2 ( <0.1%)             |
| 5-ETHYL-6-PHENYLPYRIDO-1,3-THIAZIN-2,4-DION | 0                      | 1 ( <0.1%)             | 1 ( <0.1%)             |
| ACEMETACIN                                  | 0                      | 1 ( <0.1%)             | 1 ( <0.1%)             |
| ACETAZOLAMIDE                               | 0                      | 1 ( <0.1%)             | 1 ( <0.1%)             |

**Table 14.1.1 / 38: Number of subjects who took at least one concomitant medication (FAS)**

| Substance                                   | LCS12<br>N=1432 (100%) | LCS16<br>N=1452 (100%) | Total<br>N=2884 (100%) |
|---------------------------------------------|------------------------|------------------------|------------------------|
| ACETIC ACID DERIVATIVES AND RELATED SUBST.  | 0                      | 1 (<0.1%)              | 1 (<0.1%)              |
| ACETYLSALICYLATE LYSINE                     | 0                      | 1 (<0.1%)              | 1 (<0.1%)              |
| ADALIMUMAB                                  | 1 (<0.1%)              | 0                      | 1 (<0.1%)              |
| ALBUMIN TANNATE                             | 1 (<0.1%)              | 0                      | 1 (<0.1%)              |
| ALCLOMETASONE DIPROPIONATE                  | 0                      | 1 (<0.1%)              | 1 (<0.1%)              |
| ALENDRONATE SODIUM                          | 0                      | 1 (<0.1%)              | 1 (<0.1%)              |
| ALENDRONIC ACID                             | 0                      | 1 (<0.1%)              | 1 (<0.1%)              |
| ALFA-HEDERINA                               | 0                      | 1 (<0.1%)              | 1 (<0.1%)              |
| ALLERGEN EXTRACTS                           | 0                      | 1 (<0.1%)              | 1 (<0.1%)              |
| ALLERGENS, POLLEN & PLANT EXTRACT           | 0                      | 1 (<0.1%)              | 1 (<0.1%)              |
| ALTEPLASE                                   | 1 (<0.1%)              | 0                      | 1 (<0.1%)              |
| ALUMINIUM HYDROXIDE GEL                     | 1 (<0.1%)              | 0                      | 1 (<0.1%)              |
| AMANTADINE                                  | 1 (<0.1%)              | 0                      | 1 (<0.1%)              |
| AMANTADINE HYDROCHLORIDE                    | 1 (<0.1%)              | 0                      | 1 (<0.1%)              |
| AMIKACIN                                    | 0                      | 1 (<0.1%)              | 1 (<0.1%)              |
| AMINO ACIDS NOS                             | 0                      | 1 (<0.1%)              | 1 (<0.1%)              |
| AMYLASE                                     | 0                      | 1 (<0.1%)              | 1 (<0.1%)              |
| AMYLMETACRESOL                              | 1 (<0.1%)              | 0                      | 1 (<0.1%)              |
| ANAESTHETICS                                | 1 (<0.1%)              | 0                      | 1 (<0.1%)              |
| ANESTHETICS, LOCAL                          | 0                      | 1 (<0.1%)              | 1 (<0.1%)              |
| ANETHOLE                                    | 0                      | 1 (<0.1%)              | 1 (<0.1%)              |
| ANTHRAX VACCINE                             | 1 (<0.1%)              | 0                      | 1 (<0.1%)              |
| ANTIDOTES                                   | 1 (<0.1%)              | 0                      | 1 (<0.1%)              |
| ANTIHISTAMINES FOR SYSTEMIC USE             | 0                      | 1 (<0.1%)              | 1 (<0.1%)              |
| ANTIINFLAMMATORY/ANTIRHEUMATIC NON-STEROIDS | 0                      | 1 (<0.1%)              | 1 (<0.1%)              |
| ANTIINFLAMMATORY/ANTIRHEUMATIC PRODUCTS     | 1 (<0.1%)              | 0                      | 1 (<0.1%)              |
| ANTIMALARIALS                               | 0                      | 1 (<0.1%)              | 1 (<0.1%)              |
| ANTIPSORIATICS                              | 1 (<0.1%)              | 0                      | 1 (<0.1%)              |
| APPETITE STIMULANTS                         | 1 (<0.1%)              | 0                      | 1 (<0.1%)              |
| ARACHIS HYPOGAEA OIL                        | 0                      | 1 (<0.1%)              | 1 (<0.1%)              |
| ATRACURIUM                                  | 0                      | 1 (<0.1%)              | 1 (<0.1%)              |
| ATRACURIUM BESILATE                         | 0                      | 1 (<0.1%)              | 1 (<0.1%)              |
| ATROPA BELLADONNA EXTRACT                   | 1 (<0.1%)              | 0                      | 1 (<0.1%)              |
| ATTAPULGITE                                 | 0                      | 1 (<0.1%)              | 1 (<0.1%)              |
| BACLOFEN                                    | 1 (<0.1%)              | 0                      | 1 (<0.1%)              |
| BECLOMETASONE                               | 1 (<0.1%)              | 0                      | 1 (<0.1%)              |
| BENACTYZINE HYDROCHLORIDE                   | 0                      | 1 (<0.1%)              | 1 (<0.1%)              |
| BENAZEPRIL                                  | 1 (<0.1%)              | 0                      | 1 (<0.1%)              |
| BENZALKONIUM BROMIDE                        | 0                      | 1 (<0.1%)              | 1 (<0.1%)              |
| BENZATROPINE MESILATE                       | 0                      | 1 (<0.1%)              | 1 (<0.1%)              |
| BENZYDAMINE HYDROCHLORIDE                   | 1 (<0.1%)              | 0                      | 1 (<0.1%)              |
| BENZYL BENZOATE                             | 1 (<0.1%)              | 0                      | 1 (<0.1%)              |
| BENZYL PENICILLIN                           | 1 (<0.1%)              | 0                      | 1 (<0.1%)              |
| BENZYL PENICILLIN POTASSIUM                 | 0                      | 1 (<0.1%)              | 1 (<0.1%)              |
| BENZYL PENICILLIN SODIUM                    | 1 (<0.1%)              | 0                      | 1 (<0.1%)              |

**Table 14.1.1 / 38: Number of subjects who took at least one concomitant medication (FAS)**

| Substance                                     | LCS12<br>N=1432 (100%) | LCS16<br>N=1452 (100%) | Total<br>N=2884 (100%) |
|-----------------------------------------------|------------------------|------------------------|------------------------|
| BETA-LACTAM ANTIBACTERIALS, PENICILLINS       | 1 (<0.1%)              | 0                      | 1 (<0.1%)              |
| BETAINE HYDROCHLORIDE                         | 0                      | 1 (<0.1%)              | 1 (<0.1%)              |
| BETAMETHASONE BENZOATE                        | 0                      | 1 (<0.1%)              | 1 (<0.1%)              |
| BIBROCATHOL                                   | 1 (<0.1%)              | 0                      | 1 (<0.1%)              |
| BORNEOL                                       | 0                      | 1 (<0.1%)              | 1 (<0.1%)              |
| BROMOCRIPTINE MESILATE                        | 0                      | 1 (<0.1%)              | 1 (<0.1%)              |
| BUPRENORPHINE                                 | 1 (<0.1%)              | 0                      | 1 (<0.1%)              |
| BUTOCONAZOLE                                  | 1 (<0.1%)              | 0                      | 1 (<0.1%)              |
| BUTORPHANOL TARTRATE                          | 1 (<0.1%)              | 0                      | 1 (<0.1%)              |
| CABERGOLINE                                   | 0                      | 1 (<0.1%)              | 1 (<0.1%)              |
| CAFFEINE CITRATE                              | 0                      | 1 (<0.1%)              | 1 (<0.1%)              |
| CALCIFEDIOL                                   | 1 (<0.1%)              | 0                      | 1 (<0.1%)              |
| CALCITONIN, SALMON                            | 0                      | 1 (<0.1%)              | 1 (<0.1%)              |
| CALCIUM CHLORIDE ANHYDROUS                    | 1 (<0.1%)              | 0                      | 1 (<0.1%)              |
| CALCIUM DOBESILATE                            | 0                      | 1 (<0.1%)              | 1 (<0.1%)              |
| CALCIUM FOLINATE                              | 1 (<0.1%)              | 0                      | 1 (<0.1%)              |
| CALENDULA OFFICINALIS                         | 0                      | 1 (<0.1%)              | 1 (<0.1%)              |
| CAMPHENE                                      | 0                      | 1 (<0.1%)              | 1 (<0.1%)              |
| CAMPHOR MONOBROMIDE                           | 1 (<0.1%)              | 0                      | 1 (<0.1%)              |
| CAMYLOFIN HYDROCHLORIDE                       | 1 (<0.1%)              | 0                      | 1 (<0.1%)              |
| CANDIDA ALBICANS                              | 1 (<0.1%)              | 0                      | 1 (<0.1%)              |
| CANDIDA PARAPSILOSIS                          | 1 (<0.1%)              | 0                      | 1 (<0.1%)              |
| CAPILLARY STABILIZING AGENTS                  | 0                      | 1 (<0.1%)              | 1 (<0.1%)              |
| CAPSAICIN                                     | 1 (<0.1%)              | 0                      | 1 (<0.1%)              |
| CARBOCISTEINE                                 | 0                      | 1 (<0.1%)              | 1 (<0.1%)              |
| CARBOHYDRATES/PROTEINS/MINERALS/VITAMINS, COM | 1 (<0.1%)              | 0                      | 1 (<0.1%)              |
| CARBROMAL                                     | 0                      | 1 (<0.1%)              | 1 (<0.1%)              |
| CARVEDILOL                                    | 1 (<0.1%)              | 0                      | 1 (<0.1%)              |
| CEFACLOR                                      | 1 (<0.1%)              | 0                      | 1 (<0.1%)              |
| CEFALOTIN                                     | 1 (<0.1%)              | 0                      | 1 (<0.1%)              |
| CEFEPIME                                      | 0                      | 1 (<0.1%)              | 1 (<0.1%)              |
| CEFOTAXIME                                    | 0                      | 1 (<0.1%)              | 1 (<0.1%)              |
| CEFOXITIN SODIUM                              | 0                      | 1 (<0.1%)              | 1 (<0.1%)              |
| CEFTRIAOXONE SODIUM                           | 1 (<0.1%)              | 0                      | 1 (<0.1%)              |
| CELLULASE                                     | 0                      | 1 (<0.1%)              | 1 (<0.1%)              |
| CENTELLA ASIATICA                             | 0                      | 1 (<0.1%)              | 1 (<0.1%)              |
| CEPHAELIS SPP. FLUID EXTRACT                  | 1 (<0.1%)              | 0                      | 1 (<0.1%)              |
| CHLORHEXIDINE HYDROCHLORIDE                   | 1 (<0.1%)              | 0                      | 1 (<0.1%)              |
| CHLORINE                                      | 1 (<0.1%)              | 0                      | 1 (<0.1%)              |
| CHLORMADINONE ACETATE                         | 0                      | 1 (<0.1%)              | 1 (<0.1%)              |
| CHLOROFORM                                    | 1 (<0.1%)              | 0                      | 1 (<0.1%)              |
| CHLOROQUINE                                   | 0                      | 1 (<0.1%)              | 1 (<0.1%)              |
| CHLORQUINALDOL                                | 1 (<0.1%)              | 0                      | 1 (<0.1%)              |
| CHLORZOXAZONE                                 | 1 (<0.1%)              | 0                      | 1 (<0.1%)              |
| CHROMIC CHLORIDE                              | 1 (<0.1%)              | 0                      | 1 (<0.1%)              |

**Table 14.1.1 / 38: Number of subjects who took at least one concomitant medication (FAS)**

| Substance                                   | LCS12<br>N=1432 (100%) | LCS16<br>N=1452 (100%) | Total<br>N=2884 (100%) |
|---------------------------------------------|------------------------|------------------------|------------------------|
| CHROMIUM PICOLINATE                         | 1 (<0.1%)              | 0                      | 1 (<0.1%)              |
| CICLOPIROX OLAMINE                          | 0                      | 1 (<0.1%)              | 1 (<0.1%)              |
| CIMETIDINE                                  | 0                      | 1 (<0.1%)              | 1 (<0.1%)              |
| CIPROFLOXACIN LACTATE                       | 0                      | 1 (<0.1%)              | 1 (<0.1%)              |
| CISAPRIDE                                   | 1 (<0.1%)              | 0                      | 1 (<0.1%)              |
| CITICOLINE                                  | 0                      | 1 (<0.1%)              | 1 (<0.1%)              |
| CLEMASTINE                                  | 1 (<0.1%)              | 0                      | 1 (<0.1%)              |
| CLENBUTEROL HYDROCHLORIDE                   | 1 (<0.1%)              | 0                      | 1 (<0.1%)              |
| CLIOQUINOL                                  | 0                      | 1 (<0.1%)              | 1 (<0.1%)              |
| CLOMIPRAMINE HYDROCHLORIDE                  | 1 (<0.1%)              | 0                      | 1 (<0.1%)              |
| CLOXACILLIN                                 | 1 (<0.1%)              | 0                      | 1 (<0.1%)              |
| CODEINE HYDROCHLORIDE                       | 1 (<0.1%)              | 0                      | 1 (<0.1%)              |
| CODEINE PHOSPHATE HEMIHYDRATE               | 0                      | 1 (<0.1%)              | 1 (<0.1%)              |
| COLESEVELAM HYDROCHLORIDE                   | 1 (<0.1%)              | 0                      | 1 (<0.1%)              |
| COLESTIPOL                                  | 0                      | 1 (<0.1%)              | 1 (<0.1%)              |
| COMBINATIONS OF VITAMINS                    | 1 (<0.1%)              | 0                      | 1 (<0.1%)              |
| CONTACT LAXATIVES                           | 1 (<0.1%)              | 0                      | 1 (<0.1%)              |
| CONTRACEPTIVES FOR TOPICAL USE              | 1 (<0.1%)              | 0                      | 1 (<0.1%)              |
| COPPER                                      | 0                      | 1 (<0.1%)              | 1 (<0.1%)              |
| COPPER GLUCONATE                            | 1 (<0.1%)              | 0                      | 1 (<0.1%)              |
| CORTICOSTEROID NOS                          | 0                      | 1 (<0.1%)              | 1 (<0.1%)              |
| CORTICOSTEROIDS AND ANTIINFECTIVES IN COMB. | 0                      | 1 (<0.1%)              | 1 (<0.1%)              |
| CUPRIC CARBONATE, BASIC                     | 1 (<0.1%)              | 0                      | 1 (<0.1%)              |
| CYANOCOBALAMIN-TANNIN COMPLEX               | 1 (<0.1%)              | 0                      | 1 (<0.1%)              |
| CYCLOPENTOLATE HYDROCHLORIDE                | 1 (<0.1%)              | 0                      | 1 (<0.1%)              |
| CYPROHEPTADINE                              | 1 (<0.1%)              | 0                      | 1 (<0.1%)              |
| CYSTINE                                     | 0                      | 1 (<0.1%)              | 1 (<0.1%)              |
| D-MANNOSE                                   | 1 (<0.1%)              | 0                      | 1 (<0.1%)              |
| DABIGATRAN ETEXILATE                        | 0                      | 1 (<0.1%)              | 1 (<0.1%)              |
| DALTEPARIN                                  | 1 (<0.1%)              | 0                      | 1 (<0.1%)              |
| DAPSONE                                     | 0                      | 1 (<0.1%)              | 1 (<0.1%)              |
| DAPTOMYCIN                                  | 0                      | 1 (<0.1%)              | 1 (<0.1%)              |
| DARIFENACIN                                 | 0                      | 1 (<0.1%)              | 1 (<0.1%)              |
| DESVENLAFAXINE                              | 0                      | 1 (<0.1%)              | 1 (<0.1%)              |
| DEXAMETHASONE ACETATE                       | 1 (<0.1%)              | 0                      | 1 (<0.1%)              |
| DEXAMETHASONE SODIUM PHOSPHATE              | 1 (<0.1%)              | 0                      | 1 (<0.1%)              |
| DEXMETHYLPHENIDATE HYDROCHLORIDE            | 1 (<0.1%)              | 0                      | 1 (<0.1%)              |
| DICLOXACILLIN                               | 0                      | 1 (<0.1%)              | 1 (<0.1%)              |
| DICLOXACILLIN SODIUM MONOHYDRATE            | 0                      | 1 (<0.1%)              | 1 (<0.1%)              |
| DIGOXIN                                     | 0                      | 1 (<0.1%)              | 1 (<0.1%)              |
| DIHYDROXY ALUMINUM SODIUM CARBONATE         | 1 (<0.1%)              | 0                      | 1 (<0.1%)              |
| DIMETHYL SULFOXIDE                          | 1 (<0.1%)              | 0                      | 1 (<0.1%)              |
| DIMETICONE                                  | 0                      | 1 (<0.1%)              | 1 (<0.1%)              |
| DIPHENHYDRAMINE CITRATE                     | 1 (<0.1%)              | 0                      | 1 (<0.1%)              |
| DIPHENOXYLATE HYDROCHLORIDE                 | 0                      | 1 (<0.1%)              | 1 (<0.1%)              |

**Table 14.1.1 / 38: Number of subjects who took at least one concomitant medication (FAS)**

| Substance                                    | LCS12<br>N=1432 (100%) | LCS16<br>N=1452 (100%) | Total<br>N=2884 (100%) |
|----------------------------------------------|------------------------|------------------------|------------------------|
| DIPHENYLPYRALINE HYDROCHLORIDE               | 1 (<0.1%)              | 0                      | 1 (<0.1%)              |
| DIPHTHERIA AND TETANUS TOXOIDS AND PERTUSSIS | 0                      | 1 (<0.1%)              | 1 (<0.1%)              |
| DISULFIRAM                                   | 0                      | 1 (<0.1%)              | 1 (<0.1%)              |
| DL- LACTIC ACID                              | 0                      | 1 (<0.1%)              | 1 (<0.1%)              |
| DOMPERIDONE MALEATE                          | 1 (<0.1%)              | 0                      | 1 (<0.1%)              |
| DONEPEZIL HYDROCHLORIDE                      | 1 (<0.1%)              | 0                      | 1 (<0.1%)              |
| DROTAVERINE                                  | 1 (<0.1%)              | 0                      | 1 (<0.1%)              |
| DRUG USED IN DIABETES                        | 1 (<0.1%)              | 0                      | 1 (<0.1%)              |
| DULOXETINE                                   | 1 (<0.1%)              | 0                      | 1 (<0.1%)              |
| DYDROGESTERONE                               | 1 (<0.1%)              | 0                      | 1 (<0.1%)              |
| EDETC ACID                                   | 1 (<0.1%)              | 0                      | 1 (<0.1%)              |
| EFLORNITHINE                                 | 0                      | 1 (<0.1%)              | 1 (<0.1%)              |
| ELECTROLYTE SOLUTIONS                        | 0                      | 1 (<0.1%)              | 1 (<0.1%)              |
| EMEDASTINE                                   | 1 (<0.1%)              | 0                      | 1 (<0.1%)              |
| EMOLLIENTS AND PROTECTIVES                   | 0                      | 1 (<0.1%)              | 1 (<0.1%)              |
| ENOXACIN SESQUIHYDRATE                       | 1 (<0.1%)              | 0                      | 1 (<0.1%)              |
| ERTAPENEM SODIUM                             | 1 (<0.1%)              | 0                      | 1 (<0.1%)              |
| ERYTHROMYCIN ETHYLSUCCINATE                  | 0                      | 1 (<0.1%)              | 1 (<0.1%)              |
| ESCULOSIDE                                   | 1 (<0.1%)              | 0                      | 1 (<0.1%)              |
| ESSENTIAL OILS NOS                           | 0                      | 1 (<0.1%)              | 1 (<0.1%)              |
| ESTROGENS CONJUGATED                         | 0                      | 1 (<0.1%)              | 1 (<0.1%)              |
| ETANERCEPT                                   | 0                      | 1 (<0.1%)              | 1 (<0.1%)              |
| ETHAMBUTOL                                   | 1 (<0.1%)              | 0                      | 1 (<0.1%)              |
| ETIFOXINE                                    | 0                      | 1 (<0.1%)              | 1 (<0.1%)              |
| ETOFENAMATE                                  | 0                      | 1 (<0.1%)              | 1 (<0.1%)              |
| ETYNODIOL DIACETATE                          | 0                      | 1 (<0.1%)              | 1 (<0.1%)              |
| EXPECTORANTS                                 | 0                      | 1 (<0.1%)              | 1 (<0.1%)              |
| FAMCICLOVIR                                  | 1 (<0.1%)              | 0                      | 1 (<0.1%)              |
| FENCHONE                                     | 0                      | 1 (<0.1%)              | 1 (<0.1%)              |
| FENOTEROL                                    | 1 (<0.1%)              | 0                      | 1 (<0.1%)              |
| FENOXAZOLINE HYDROCHLORIDE                   | 0                      | 1 (<0.1%)              | 1 (<0.1%)              |
| FERRIC HYDROXIDE POLYMALTOSE                 | 1 (<0.1%)              | 0                      | 1 (<0.1%)              |
| FERRIC HYDROXIDE POLYMALTOSE COMPLEX         | 0                      | 1 (<0.1%)              | 1 (<0.1%)              |
| FERRIC SODIUM GLUCONATE COMPLEX              | 0                      | 1 (<0.1%)              | 1 (<0.1%)              |
| FERROUS GLUCONATE                            | 0                      | 1 (<0.1%)              | 1 (<0.1%)              |
| FIBRE, DIETARY                               | 1 (<0.1%)              | 0                      | 1 (<0.1%)              |
| FLUNARIZINE                                  | 1 (<0.1%)              | 0                      | 1 (<0.1%)              |
| FLUOCORTOLONE                                | 0                      | 1 (<0.1%)              | 1 (<0.1%)              |
| FLUOCORTOLONE PIVALATE                       | 0                      | 1 (<0.1%)              | 1 (<0.1%)              |
| FLUOROMETHOLONE                              | 0                      | 1 (<0.1%)              | 1 (<0.1%)              |
| FLUOROQUINOLONES                             | 0                      | 1 (<0.1%)              | 1 (<0.1%)              |
| FLUOROURACIL                                 | 0                      | 1 (<0.1%)              | 1 (<0.1%)              |
| FLUTEMAZEPAM                                 | 0                      | 1 (<0.1%)              | 1 (<0.1%)              |
| FLUVOXAMINE MALEATE                          | 0                      | 1 (<0.1%)              | 1 (<0.1%)              |
| FORMOTEROL                                   | 1 (<0.1%)              | 0                      | 1 (<0.1%)              |



**Table 14.1.1 / 38: Number of subjects who took at least one concomitant medication (FAS)**

| Substance                                     | LCS12<br>N=1432 (100%) | LCS16<br>N=1452 (100%) | Total<br>N=2884 (100%) |
|-----------------------------------------------|------------------------|------------------------|------------------------|
| FOSINOPRIL SODIUM                             | 1 (<0.1%)              | 0                      | 1 (<0.1%)              |
| FROVATRIPTAN                                  | 0                      | 1 (<0.1%)              | 1 (<0.1%)              |
| FUROSEMIDE SODIUM                             | 1 (<0.1%)              | 0                      | 1 (<0.1%)              |
| GEMIFLOXACIN                                  | 0                      | 1 (<0.1%)              | 1 (<0.1%)              |
| GENITO URINARY SYSTEM AND SEX HORMONES        | 0                      | 1 (<0.1%)              | 1 (<0.1%)              |
| GINKGO BILOBA                                 | 1 (<0.1%)              | 0                      | 1 (<0.1%)              |
| GLIBENCLAMIDE                                 | 1 (<0.1%)              | 0                      | 1 (<0.1%)              |
| GLUCOMANNAN                                   | 0                      | 1 (<0.1%)              | 1 (<0.1%)              |
| GLUCONIC ACID                                 | 1 (<0.1%)              | 0                      | 1 (<0.1%)              |
| GLYCERYL TRINITRATE                           | 1 (<0.1%)              | 0                      | 1 (<0.1%)              |
| GLYCOLIC ACID                                 | 1 (<0.1%)              | 0                      | 1 (<0.1%)              |
| GLYCYRRHIZIC ACID, AMMONIUM SALT              | 1 (<0.1%)              | 0                      | 1 (<0.1%)              |
| GOSERELIN                                     | 0                      | 1 (<0.1%)              | 1 (<0.1%)              |
| GUAIACOL                                      | 0                      | 1 (<0.1%)              | 1 (<0.1%)              |
| GUAIACOL CARBONATE                            | 1 (<0.1%)              | 0                      | 1 (<0.1%)              |
| GYNAECOLOGICAL ANTIINFECTIVES AND ANTISEPTICS | 1 (<0.1%)              | 0                      | 1 (<0.1%)              |
| HAEMOPHILUS INFLUENZA LYSATE                  | 0                      | 1 (<0.1%)              | 1 (<0.1%)              |
| HAEMOPHILUS INFLUENZAE TYPE B POLYSACCHARIDE  | 1 (<0.1%)              | 0                      | 1 (<0.1%)              |
| HALOPERIDOL DECANOATE                         | 0                      | 1 (<0.1%)              | 1 (<0.1%)              |
| HEDERA HELIX                                  | 1 (<0.1%)              | 0                      | 1 (<0.1%)              |
| HELICIDINE                                    | 0                      | 1 (<0.1%)              | 1 (<0.1%)              |
| HEPARIN CALCIUM                               | 1 (<0.1%)              | 0                      | 1 (<0.1%)              |
| HETASTARCH                                    | 1 (<0.1%)              | 0                      | 1 (<0.1%)              |
| HOMATROPINE                                   | 0                      | 1 (<0.1%)              | 1 (<0.1%)              |
| HOMATROPINE METHYLBROMIDE                     | 1 (<0.1%)              | 0                      | 1 (<0.1%)              |
| HYALURONIC ACID                               | 1 (<0.1%)              | 0                      | 1 (<0.1%)              |
| HYDROCORTISONE CAPRONATE                      | 1 (<0.1%)              | 0                      | 1 (<0.1%)              |
| HYDROCORTISONE SODIUM SUCCINATE               | 1 (<0.1%)              | 0                      | 1 (<0.1%)              |
| HYDROXOCOBALAMIN                              | 1 (<0.1%)              | 0                      | 1 (<0.1%)              |
| HYDROXYZINE EMBONATE                          | 0                      | 1 (<0.1%)              | 1 (<0.1%)              |
| HYETELLOSE                                    | 0                      | 1 (<0.1%)              | 1 (<0.1%)              |
| HYOSCINE METHOBROMIDE                         | 0                      | 1 (<0.1%)              | 1 (<0.1%)              |
| HYOSCINE METHONITRATE                         | 1 (<0.1%)              | 0                      | 1 (<0.1%)              |
| HYPERICUM PERFORATUM                          | 1 (<0.1%)              | 0                      | 1 (<0.1%)              |
| IMIPENEM                                      | 1 (<0.1%)              | 0                      | 1 (<0.1%)              |
| IMIPRAMINE HYDROCHLORIDE                      | 1 (<0.1%)              | 0                      | 1 (<0.1%)              |
| IMMUNOGLOBULIN HUMAN ANTI-RH                  | 0                      | 1 (<0.1%)              | 1 (<0.1%)              |
| IMMUNOSUPPRESSIVE AGENTS                      | 0                      | 1 (<0.1%)              | 1 (<0.1%)              |
| INOSINE PRANOBEX                              | 0                      | 1 (<0.1%)              | 1 (<0.1%)              |
| INSULIN                                       | 0                      | 1 (<0.1%)              | 1 (<0.1%)              |
| INSULIN ASPART                                | 1 (<0.1%)              | 0                      | 1 (<0.1%)              |
| INSULIN GLARGINE                              | 0                      | 1 (<0.1%)              | 1 (<0.1%)              |
| INTESTINAL ANTIINFECTIVES                     | 0                      | 1 (<0.1%)              | 1 (<0.1%)              |
| INVERT SUGAR                                  | 1 (<0.1%)              | 0                      | 1 (<0.1%)              |
| IODINE                                        | 0                      | 1 (<0.1%)              | 1 (<0.1%)              |

**Table 14.1.1 / 38: Number of subjects who took at least one concomitant medication (FAS)**

| Substance                           | LCS12<br>N=1432 (100%) | LCS16<br>N=1452 (100%) | Total<br>N=2884 (100%) |
|-------------------------------------|------------------------|------------------------|------------------------|
| IOPAMIDOL                           | 0                      | 1 (<0.1%)              | 1 (<0.1%)              |
| IPRATROPIUM                         | 1 (<0.1%)              | 0                      | 1 (<0.1%)              |
| IPRAZOCHROME                        | 0                      | 1 (<0.1%)              | 1 (<0.1%)              |
| IRON IN COMBINATION WITH FOLIC ACID | 1 (<0.1%)              | 0                      | 1 (<0.1%)              |
| ISOMETHEPTENE MUCATE                | 0                      | 1 (<0.1%)              | 1 (<0.1%)              |
| ISONIAZID                           | 1 (<0.1%)              | 0                      | 1 (<0.1%)              |
| IVERMECTIN                          | 1 (<0.1%)              | 0                      | 1 (<0.1%)              |
| JAPANESE ENCEPHALITIS VACCINE       | 1 (<0.1%)              | 0                      | 1 (<0.1%)              |
| KETAMINE HYDROCHLORIDE              | 1 (<0.1%)              | 0                      | 1 (<0.1%)              |
| KLEBSIELLA OZAENAE LYSATE           | 0                      | 1 (<0.1%)              | 1 (<0.1%)              |
| KLEBSIELLA PNEUMONIAE LYSATE        | 0                      | 1 (<0.1%)              | 1 (<0.1%)              |
| LABETALOL                           | 1 (<0.1%)              | 0                      | 1 (<0.1%)              |
| LABETALOL HYDROCHLORIDE             | 1 (<0.1%)              | 0                      | 1 (<0.1%)              |
| LACTOBACILLUS CASEI                 | 0                      | 1 (<0.1%)              | 1 (<0.1%)              |
| LACTOBACILLUS RHAMNOSUS             | 1 (<0.1%)              | 0                      | 1 (<0.1%)              |
| LANOLIN                             | 1 (<0.1%)              | 0                      | 1 (<0.1%)              |
| LAXATIVES                           | 1 (<0.1%)              | 0                      | 1 (<0.1%)              |
| LEFLUNOMIDE                         | 1 (<0.1%)              | 0                      | 1 (<0.1%)              |
| LEVOBUPIVACAINE                     | 1 (<0.1%)              | 0                      | 1 (<0.1%)              |
| LINOLEIC ACID                       | 1 (<0.1%)              | 0                      | 1 (<0.1%)              |
| LINUM USITATISSIMUM                 | 0                      | 1 (<0.1%)              | 1 (<0.1%)              |
| LIOTHYRONINE                        | 0                      | 1 (<0.1%)              | 1 (<0.1%)              |
| LITHIUM                             | 0                      | 1 (<0.1%)              | 1 (<0.1%)              |
| LODOXAMIDE                          | 1 (<0.1%)              | 0                      | 1 (<0.1%)              |
| LOSARTAN POTASSIUM                  | 1 (<0.1%)              | 0                      | 1 (<0.1%)              |
| LOXOPROFEN                          | 1 (<0.1%)              | 0                      | 1 (<0.1%)              |
| LYMECYCLINE                         | 0                      | 1 (<0.1%)              | 1 (<0.1%)              |
| MAGNESIUM AMINO ACID CHELATE        | 1 (<0.1%)              | 0                      | 1 (<0.1%)              |
| MAGNESIUM CHLORIDE ANHYDROUS        | 1 (<0.1%)              | 0                      | 1 (<0.1%)              |
| MAGNESIUM CITRATE                   | 1 (<0.1%)              | 0                      | 1 (<0.1%)              |
| MAGNESIUM GLUCONATE                 | 0                      | 1 (<0.1%)              | 1 (<0.1%)              |
| MANGANESE CHLORIDE                  | 1 (<0.1%)              | 0                      | 1 (<0.1%)              |
| MANGANESE GLUCONATE                 | 1 (<0.1%)              | 0                      | 1 (<0.1%)              |
| MEBEVERINE HYDROCHLORIDE            | 0                      | 1 (<0.1%)              | 1 (<0.1%)              |
| MECLOZINE HYDROCHLORIDE             | 1 (<0.1%)              | 0                      | 1 (<0.1%)              |
| MEGLUMINE AMIDOTRIZOATE             | 0                      | 1 (<0.1%)              | 1 (<0.1%)              |
| MELILOTUS OFFICINALIS               | 1 (<0.1%)              | 0                      | 1 (<0.1%)              |
| MENADIONE                           | 0                      | 1 (<0.1%)              | 1 (<0.1%)              |
| MEPACRINE HYDROCHLORIDE             | 0                      | 1 (<0.1%)              | 1 (<0.1%)              |
| METFORMIN HYDROCHLORIDE             | 0                      | 1 (<0.1%)              | 1 (<0.1%)              |
| METHADONE                           | 0                      | 1 (<0.1%)              | 1 (<0.1%)              |
| METHENAMINE HIPPURATE               | 1 (<0.1%)              | 0                      | 1 (<0.1%)              |
| METHYLPHENIDATE                     | 1 (<0.1%)              | 0                      | 1 (<0.1%)              |
| METHYLPREDNISOLONE ACEPONATE        | 1 (<0.1%)              | 0                      | 1 (<0.1%)              |
| METOPIMAZINE                        | 0                      | 1 (<0.1%)              | 1 (<0.1%)              |

**Table 14.1.1 / 38: Number of subjects who took at least one concomitant medication (FAS)**

| Substance                              | LCS12<br>N=1432 (100%) | LCS16<br>N=1452 (100%) | Total<br>N=2884 (100%) |
|----------------------------------------|------------------------|------------------------|------------------------|
| METRONIDAZOLE HYDROCHLORIDE            | 1 (<0.1%)              | 0                      | 1 (<0.1%)              |
| MEXILETINE                             | 0                      | 1 (<0.1%)              | 1 (<0.1%)              |
| MIANSERIN                              | 1 (<0.1%)              | 0                      | 1 (<0.1%)              |
| MIANSERIN HYDROCHLORIDE                | 0                      | 1 (<0.1%)              | 1 (<0.1%)              |
| MILNACIPRAN HYDROCHLORIDE              | 0                      | 1 (<0.1%)              | 1 (<0.1%)              |
| MINERAL OIL EMULSION                   | 0                      | 1 (<0.1%)              | 1 (<0.1%)              |
| MINERAL SUPPLEMENTS                    | 0                      | 1 (<0.1%)              | 1 (<0.1%)              |
| MIVACURIUM CHLORIDE                    | 0                      | 1 (<0.1%)              | 1 (<0.1%)              |
| MOCLOBEMIDE                            | 1 (<0.1%)              | 0                      | 1 (<0.1%)              |
| MORPHINE HYDROCHLORIDE                 | 1 (<0.1%)              | 0                      | 1 (<0.1%)              |
| MOXONIDINE                             | 0                      | 1 (<0.1%)              | 1 (<0.1%)              |
| MULTIVITAMINS AND IRON                 | 1 (<0.1%)              | 0                      | 1 (<0.1%)              |
| NALOXONE                               | 1 (<0.1%)              | 0                      | 1 (<0.1%)              |
| NAPHAZOLINE HYDROCHLORIDE              | 1 (<0.1%)              | 0                      | 1 (<0.1%)              |
| NASAL DECONGESTANTS FOR TOPICAL USE    | 1 (<0.1%)              | 0                      | 1 (<0.1%)              |
| NEBIVOLOL                              | 1 (<0.1%)              | 0                      | 1 (<0.1%)              |
| NEISSERIA CATARRHALIS LYSATE           | 0                      | 1 (<0.1%)              | 1 (<0.1%)              |
| NEOSTIGMINE                            | 0                      | 1 (<0.1%)              | 1 (<0.1%)              |
| NEOSTIGMINE BROMIDE                    | 1 (<0.1%)              | 0                      | 1 (<0.1%)              |
| NIMODIPINE                             | 1 (<0.1%)              | 0                      | 1 (<0.1%)              |
| NITAZOXANIDE                           | 1 (<0.1%)              | 0                      | 1 (<0.1%)              |
| NITROFURAL                             | 1 (<0.1%)              | 0                      | 1 (<0.1%)              |
| NITROUS OXIDE                          | 0                      | 1 (<0.1%)              | 1 (<0.1%)              |
| OLMESARTAN MEDOXOMIL                   | 0                      | 1 (<0.1%)              | 1 (<0.1%)              |
| OMALIZUMAB                             | 0                      | 1 (<0.1%)              | 1 (<0.1%)              |
| OMEGA-3 FATTY ACIDS                    | 0                      | 1 (<0.1%)              | 1 (<0.1%)              |
| OPIUM ALKALOIDS AND DERIVATIVES        | 0                      | 1 (<0.1%)              | 1 (<0.1%)              |
| OPIUM ALKALOIDS TOTAL                  | 1 (<0.1%)              | 0                      | 1 (<0.1%)              |
| OTHER ANTIDEPRESSANTS                  | 1 (<0.1%)              | 0                      | 1 (<0.1%)              |
| OTHER ANTIINFLAMMATORY AGENTS IN COMB. | 0                      | 1 (<0.1%)              | 1 (<0.1%)              |
| OTHER DERMATOLOGICAL PREPARATIONS      | 0                      | 1 (<0.1%)              | 1 (<0.1%)              |
| OTHER HYPNOTICS AND SEDATIVES          | 0                      | 1 (<0.1%)              | 1 (<0.1%)              |
| OTOLOGICALS                            | 1 (<0.1%)              | 0                      | 1 (<0.1%)              |
| OXAPROZIN                              | 1 (<0.1%)              | 0                      | 1 (<0.1%)              |
| OXETORONE FUMARATE                     | 1 (<0.1%)              | 0                      | 1 (<0.1%)              |
| OXYBUTYNIN                             | 0                      | 1 (<0.1%)              | 1 (<0.1%)              |
| OXYBUTYNIN HYDROCHLORIDE               | 1 (<0.1%)              | 0                      | 1 (<0.1%)              |
| OXYTOCIN                               | 1 (<0.1%)              | 0                      | 1 (<0.1%)              |
| PANCREATIN                             | 0                      | 1 (<0.1%)              | 1 (<0.1%)              |
| PANICUM MILIACEUM                      | 0                      | 1 (<0.1%)              | 1 (<0.1%)              |
| PAPAIN                                 | 0                      | 1 (<0.1%)              | 1 (<0.1%)              |
| PARAFFIN, LIQUID                       | 0                      | 1 (<0.1%)              | 1 (<0.1%)              |
| PARAHYDROXYBENZOIC ACID                | 1 (<0.1%)              | 0                      | 1 (<0.1%)              |
| PECTIN                                 | 0                      | 1 (<0.1%)              | 1 (<0.1%)              |
| PELARGONIUM PULVERULENTUM ROOT         | 0                      | 1 (<0.1%)              | 1 (<0.1%)              |

**Table 14.1.1 / 38: Number of subjects who took at least one concomitant medication (FAS)**

| Substance                         | LCS12<br>N=1432 (100%) | LCS16<br>N=1452 (100%) | Total<br>N=2884 (100%) |
|-----------------------------------|------------------------|------------------------|------------------------|
| PELARGONIUM SIDOIDES              | 0                      | 1 (<0.1%)              | 1 (<0.1%)              |
| PELARGONIUM SIDOIDES ROOT         | 0                      | 1 (<0.1%)              | 1 (<0.1%)              |
| PENTOSAN POLYSULFATE SODIUM       | 0                      | 1 (<0.1%)              | 1 (<0.1%)              |
| PENTOXYVERINE CITRATE             | 0                      | 1 (<0.1%)              | 1 (<0.1%)              |
| PERINDOPRIL                       | 1 (<0.1%)              | 0                      | 1 (<0.1%)              |
| PERTUSSIS VACCINE ACELLULAR       | 0                      | 1 (<0.1%)              | 1 (<0.1%)              |
| PHENAZONE                         | 1 (<0.1%)              | 0                      | 1 (<0.1%)              |
| PHENETICILLIN POTASSIUM           | 0                      | 1 (<0.1%)              | 1 (<0.1%)              |
| PHENYLTOLOXAMINE CITRATE          | 0                      | 1 (<0.1%)              | 1 (<0.1%)              |
| PHENYTOIN                         | 1 (<0.1%)              | 0                      | 1 (<0.1%)              |
| PHOSPHORIC ACID                   | 1 (<0.1%)              | 0                      | 1 (<0.1%)              |
| PHOSPHORIC ACID SODIUM            | 0                      | 1 (<0.1%)              | 1 (<0.1%)              |
| PHTHALYLSULFATHIAZOLE             | 0                      | 1 (<0.1%)              | 1 (<0.1%)              |
| PINAVERIUM                        | 0                      | 1 (<0.1%)              | 1 (<0.1%)              |
| PINAVERIUM BROMIDE                | 1 (<0.1%)              | 0                      | 1 (<0.1%)              |
| PINENE                            | 0                      | 1 (<0.1%)              | 1 (<0.1%)              |
| PIRITRAMIDE                       | 0                      | 1 (<0.1%)              | 1 (<0.1%)              |
| PIROMIDIC ACID                    | 0                      | 1 (<0.1%)              | 1 (<0.1%)              |
| PITOFENONE HYDROCHLORIDE          | 0                      | 1 (<0.1%)              | 1 (<0.1%)              |
| PLANTAGO AFRA SEED                | 0                      | 1 (<0.1%)              | 1 (<0.1%)              |
| PLANTAGO OVATA                    | 0                      | 1 (<0.1%)              | 1 (<0.1%)              |
| POLICRESULEN                      | 1 (<0.1%)              | 0                      | 1 (<0.1%)              |
| POLIOMYELITIS VACCINE INACTIVATED | 0                      | 1 (<0.1%)              | 1 (<0.1%)              |
| POLIOMYELITIS VACCINES            | 1 (<0.1%)              | 0                      | 1 (<0.1%)              |
| POTASSIUM CITRATE                 | 1 (<0.1%)              | 0                      | 1 (<0.1%)              |
| POTASSIUM PHOSPHATE MONOBASIC     | 0                      | 1 (<0.1%)              | 1 (<0.1%)              |
| POVIDONE-IODINE                   | 1 (<0.1%)              | 0                      | 1 (<0.1%)              |
| PRAZEPAM                          | 0                      | 1 (<0.1%)              | 1 (<0.1%)              |
| PREDNISOLONE SODIUM PHOSPHATE     | 1 (<0.1%)              | 0                      | 1 (<0.1%)              |
| PRENOXDIAZIN HYDROCHLORIDE        | 1 (<0.1%)              | 0                      | 1 (<0.1%)              |
| PRISTINAMYCIN                     | 1 (<0.1%)              | 0                      | 1 (<0.1%)              |
| PROBENECID                        | 1 (<0.1%)              | 0                      | 1 (<0.1%)              |
| PROCAINE                          | 1 (<0.1%)              | 0                      | 1 (<0.1%)              |
| PROCHLORPERAZINE                  | 0                      | 1 (<0.1%)              | 1 (<0.1%)              |
| PROPOLIS                          | 0                      | 1 (<0.1%)              | 1 (<0.1%)              |
| PROPRANOLOL HYDROCHLORIDE         | 1 (<0.1%)              | 0                      | 1 (<0.1%)              |
| PROPYLENE GLYCOL                  | 1 (<0.1%)              | 0                      | 1 (<0.1%)              |
| PROTECTIVES AGAINST UV-RADIATION  | 1 (<0.1%)              | 0                      | 1 (<0.1%)              |
| PROTEIN SUPPLEMENTS               | 1 (<0.1%)              | 0                      | 1 (<0.1%)              |
| PROXIBARBAL                       | 0                      | 1 (<0.1%)              | 1 (<0.1%)              |
| PULSATILLA PRATENSIS              | 1 (<0.1%)              | 0                      | 1 (<0.1%)              |
| PYRAZINAMIDE                      | 1 (<0.1%)              | 0                      | 1 (<0.1%)              |
| PYRIDOSTIGMINE BROMIDE            | 0                      | 1 (<0.1%)              | 1 (<0.1%)              |
| PYRIMETHAMINE                     | 0                      | 1 (<0.1%)              | 1 (<0.1%)              |
| QUINAPRIL HYDROCHLORIDE           | 1 (<0.1%)              | 0                      | 1 (<0.1%)              |

**Table 14.1.1 / 38: Number of subjects who took at least one concomitant medication (FAS)**

| Substance                                     | LCS12<br>N=1432 (100%) | LCS16<br>N=1452 (100%) | Total<br>N=2884 (100%) |
|-----------------------------------------------|------------------------|------------------------|------------------------|
| RABIES IMMUNOGLOBULIN                         | 0                      | 1 (<0.1%)              | 1 (<0.1%)              |
| REBOXETINE                                    | 1 (<0.1%)              | 0                      | 1 (<0.1%)              |
| RED BLOOD CELLS, CONCENTRATED                 | 0                      | 1 (<0.1%)              | 1 (<0.1%)              |
| REMIFENTANIL                                  | 0                      | 1 (<0.1%)              | 1 (<0.1%)              |
| RETINOL ACETATE                               | 1 (<0.1%)              | 0                      | 1 (<0.1%)              |
| RETINOL PALMITATE                             | 1 (<0.1%)              | 0                      | 1 (<0.1%)              |
| RIFAMPICIN                                    | 1 (<0.1%)              | 0                      | 1 (<0.1%)              |
| RIFAXIMIN                                     | 0                      | 1 (<0.1%)              | 1 (<0.1%)              |
| RUSCUS ACULEATUS                              | 1 (<0.1%)              | 0                      | 1 (<0.1%)              |
| SALICYLATE SODIUM                             | 0                      | 1 (<0.1%)              | 1 (<0.1%)              |
| SALSALATE                                     | 0                      | 1 (<0.1%)              | 1 (<0.1%)              |
| SALVIA OFFICINALIS                            | 0                      | 1 (<0.1%)              | 1 (<0.1%)              |
| SELENOMETHIONINE                              | 1 (<0.1%)              | 0                      | 1 (<0.1%)              |
| SENNA ALEXANDRINA                             | 1 (<0.1%)              | 0                      | 1 (<0.1%)              |
| SERTACONAZOLE                                 | 0                      | 1 (<0.1%)              | 1 (<0.1%)              |
| SEX HORMONES AND MODULATORS OF THE GENI. SYS. | 1 (<0.1%)              | 0                      | 1 (<0.1%)              |
| SHARK-LIVER OIL                               | 0                      | 1 (<0.1%)              | 1 (<0.1%)              |
| SMALLPOX VACCINE                              | 1 (<0.1%)              | 0                      | 1 (<0.1%)              |
| SODIUM                                        | 1 (<0.1%)              | 0                      | 1 (<0.1%)              |
| SODIUM ACETATE                                | 1 (<0.1%)              | 0                      | 1 (<0.1%)              |
| SODIUM AMIDOTRIZOATE                          | 0                      | 1 (<0.1%)              | 1 (<0.1%)              |
| SODIUM ASCORBATE                              | 1 (<0.1%)              | 0                      | 1 (<0.1%)              |
| SODIUM LAURYL SULFATE                         | 0                      | 1 (<0.1%)              | 1 (<0.1%)              |
| SODIUM LAURYL SULFOACETATE                    | 0                      | 1 (<0.1%)              | 1 (<0.1%)              |
| SODIUM PHOSPHATE MONOBASIC (ANHYDRATE)        | 0                      | 1 (<0.1%)              | 1 (<0.1%)              |
| SODIUM SULFATE                                | 0                      | 1 (<0.1%)              | 1 (<0.1%)              |
| SOFT PARAFFIN AND FAT PRODUCTS                | 0                      | 1 (<0.1%)              | 1 (<0.1%)              |
| SOFTENERS, EMOLLIENTS                         | 1 (<0.1%)              | 0                      | 1 (<0.1%)              |
| SOLIFENACIN                                   | 0                      | 1 (<0.1%)              | 1 (<0.1%)              |
| SORBIC ACID                                   | 0                      | 1 (<0.1%)              | 1 (<0.1%)              |
| SORBITOL                                      | 0                      | 1 (<0.1%)              | 1 (<0.1%)              |
| SPIRAMYCIN                                    | 1 (<0.1%)              | 0                      | 1 (<0.1%)              |
| SPIRULINA SPP.                                | 0                      | 1 (<0.1%)              | 1 (<0.1%)              |
| STAPHYLOCOCCUS AUREUS LYSATE                  | 0                      | 1 (<0.1%)              | 1 (<0.1%)              |
| STOMATOLOGICALS, MOUTH PREPARATIONS           | 0                      | 1 (<0.1%)              | 1 (<0.1%)              |
| STREPTOCOCCUS PNEUMONIAE LYSATE               | 0                      | 1 (<0.1%)              | 1 (<0.1%)              |
| STREPTOCOCCUS PYROGENES LYSATE                | 0                      | 1 (<0.1%)              | 1 (<0.1%)              |
| STREPTOCOCCUS VIRIDANS LYSATE                 | 0                      | 1 (<0.1%)              | 1 (<0.1%)              |
| STREPTOMYCIN                                  | 0                      | 1 (<0.1%)              | 1 (<0.1%)              |
| SUFENTANIL CITRATE                            | 1 (<0.1%)              | 0                      | 1 (<0.1%)              |
| SULCONAZOLE NITRATE                           | 1 (<0.1%)              | 0                      | 1 (<0.1%)              |
| SULFACETAMIDE                                 | 1 (<0.1%)              | 0                      | 1 (<0.1%)              |
| SULFACETAMIDE SODIUM                          | 0                      | 1 (<0.1%)              | 1 (<0.1%)              |
| SULFAGUANIDINE                                | 1 (<0.1%)              | 0                      | 1 (<0.1%)              |
| SULFOGAIACOL                                  | 1 (<0.1%)              | 0                      | 1 (<0.1%)              |

**Table 14.1.1 / 38: Number of subjects who took at least one concomitant medication (FAS)**

| Substance                       | LCS12<br>N=1432 (100%) | LCS16<br>N=1452 (100%) | Total<br>N=2884 (100%) |
|---------------------------------|------------------------|------------------------|------------------------|
| SULFUR                          | 0                      | 1 (<0.1%)              | 1 (<0.1%)              |
| SULINDAC                        | 0                      | 1 (<0.1%)              | 1 (<0.1%)              |
| SYMPATHOMIMETICS                | 1 (<0.1%)              | 0                      | 1 (<0.1%)              |
| TAZAROTENE                      | 1 (<0.1%)              | 0                      | 1 (<0.1%)              |
| TERPIN HYDRATE                  | 0                      | 1 (<0.1%)              | 1 (<0.1%)              |
| TETANUS IMMUNE GLOBULIN (HUMAN) | 1 (<0.1%)              | 0                      | 1 (<0.1%)              |
| TETRAZEPAM                      | 1 (<0.1%)              | 0                      | 1 (<0.1%)              |
| THEOPHYLLINE                    | 1 (<0.1%)              | 0                      | 1 (<0.1%)              |
| THIAMAZOLE                      | 1 (<0.1%)              | 0                      | 1 (<0.1%)              |
| THIOPENTAL                      | 0                      | 1 (<0.1%)              | 1 (<0.1%)              |
| TICK-BORNE ENCEPHALITIS VACCINE | 0                      | 1 (<0.1%)              | 1 (<0.1%)              |
| TINZAPARIN SODIUM               | 1 (<0.1%)              | 0                      | 1 (<0.1%)              |
| TIOTROPIUM BROMIDE              | 1 (<0.1%)              | 0                      | 1 (<0.1%)              |
| TOCOPHERYL ACETATE              | 1 (<0.1%)              | 0                      | 1 (<0.1%)              |
| TOLPERISONE                     | 0                      | 1 (<0.1%)              | 1 (<0.1%)              |
| TONICS                          | 1 (<0.1%)              | 0                      | 1 (<0.1%)              |
| TRANLYCYPROMINE                 | 0                      | 1 (<0.1%)              | 1 (<0.1%)              |
| TRIAMCINOLONE HEXACETONIDE      | 0                      | 1 (<0.1%)              | 1 (<0.1%)              |
| TRICHLORMETHIAZIDE              | 0                      | 1 (<0.1%)              | 1 (<0.1%)              |
| TRIMIPRAMINE                    | 1 (<0.1%)              | 0                      | 1 (<0.1%)              |
| TRIPROLIDINE HYDROCHLORIDE      | 1 (<0.1%)              | 0                      | 1 (<0.1%)              |
| TRITICUM AESTIVUM GERM OIL      | 0                      | 1 (<0.1%)              | 1 (<0.1%)              |
| TUBERCULIN PPD                  | 0                      | 1 (<0.1%)              | 1 (<0.1%)              |
| TYPHOID VACCINE, LIVE ORAL      | 0                      | 1 (<0.1%)              | 1 (<0.1%)              |
| TYPHUS VACCINE                  | 1 (<0.1%)              | 0                      | 1 (<0.1%)              |
| TYROTHRIN                       | 1 (<0.1%)              | 0                      | 1 (<0.1%)              |
| UBIDECARENONE                   | 1 (<0.1%)              | 0                      | 1 (<0.1%)              |
| VALPROIC ACID                   | 1 (<0.1%)              | 0                      | 1 (<0.1%)              |
| VECURONIUM                      | 1 (<0.1%)              | 0                      | 1 (<0.1%)              |
| VITAMIN B-COMPLEX WITH MINERALS | 1 (<0.1%)              | 0                      | 1 (<0.1%)              |
| VITAMINS, OTHER COMBINATIONS    | 1 (<0.1%)              | 0                      | 1 (<0.1%)              |
| VITEX AGNUS-CASTUS              | 0                      | 1 (<0.1%)              | 1 (<0.1%)              |
| WARFARIN SODIUM                 | 1 (<0.1%)              | 0                      | 1 (<0.1%)              |
| ZINC ACETATE                    | 0                      | 1 (<0.1%)              | 1 (<0.1%)              |
| ZINC CITRATE                    | 1 (<0.1%)              | 0                      | 1 (<0.1%)              |
| ZINC SULFATE                    | 1 (<0.1%)              | 0                      | 1 (<0.1%)              |

Note: Multiple substances per drug are possible. Therefore, the same drug may be counted for more than one substance for the same subject

Note: Medications that are ongoing at the start of treatment or medications that began any time from the start of study drug until the last day of study drug (includes start and stop dates of study drug) are included in this table.

Global Biostatistics: /by-sasp/patdb/projects/de04209/310442/stat/prod\_interim03/pgms/t-cm.sas epkl 07OCT2011 10:50

End of table

**Table 14.1.1 / 39: Number of subjects who took at least one post-treatment medication (FAS)**

| Substance                                                          | LCS12<br>N=1432 (100%) | LCS16<br>N=1452 (100%) | Total<br>N=2884 (100%) |
|--------------------------------------------------------------------|------------------------|------------------------|------------------------|
| Number of subjects (%) with at least one post-treatment medication | 20 ( 1.4%)             | 17 ( 1.2%)             | 37 ( 1.3%)             |
| ETHINYLESTRADIOL                                                   | 3 ( 0.2%)              | 4 ( 0.3%)              | 7 ( 0.2%)              |
| METRONIDAZOLE                                                      | 3 ( 0.2%)              | 3 ( 0.2%)              | 6 ( 0.2%)              |
| PARACETAMOL                                                        | 3 ( 0.2%)              | 1 (<0.1%)              | 4 ( 0.1%)              |
| ETONOGESTREL                                                       | 1 (<0.1%)              | 2 ( 0.1%)              | 3 ( 0.1%)              |
| LIDOCAINE HYDROCHLORIDE                                            | 1 (<0.1%)              | 2 ( 0.1%)              | 3 ( 0.1%)              |
| NITROFURANTOIN                                                     | 1 (<0.1%)              | 2 ( 0.1%)              | 3 ( 0.1%)              |
| ONDANSETRON                                                        | 2 ( 0.1%)              | 1 (<0.1%)              | 3 ( 0.1%)              |
| CEFTRIAXONE                                                        | 1 (<0.1%)              | 1 (<0.1%)              | 2 (<0.1%)              |
| CIPROFLOXACIN                                                      | 2 ( 0.1%)              | 0                      | 2 (<0.1%)              |
| DOXYCYCLINE                                                        | 1 (<0.1%)              | 1 (<0.1%)              | 2 (<0.1%)              |
| EPINEPHRINE                                                        | 0                      | 2 ( 0.1%)              | 2 (<0.1%)              |
| FENTANYL                                                           | 1 (<0.1%)              | 1 (<0.1%)              | 2 (<0.1%)              |
| IBUPROFEN                                                          | 1 (<0.1%)              | 1 (<0.1%)              | 2 (<0.1%)              |
| LEVONORGESTREL                                                     | 2 ( 0.1%)              | 0                      | 2 (<0.1%)              |
| MIDAZOLAM HYDROCHLORIDE                                            | 2 ( 0.1%)              | 0                      | 2 (<0.1%)              |
| MORPHINE                                                           | 2 ( 0.1%)              | 0                      | 2 (<0.1%)              |
| VALACICLOVIR HYDROCHLORIDE                                         | 2 ( 0.1%)              | 0                      | 2 (<0.1%)              |
| ACICLOVIR                                                          | 1 (<0.1%)              | 0                      | 1 (<0.1%)              |
| ACRIVASTINE                                                        | 0                      | 1 (<0.1%)              | 1 (<0.1%)              |
| ALLOPURINOL                                                        | 1 (<0.1%)              | 0                      | 1 (<0.1%)              |
| AMPICILLIN                                                         | 1 (<0.1%)              | 0                      | 1 (<0.1%)              |
| ANESTHETICS, GENERAL                                               | 0                      | 1 (<0.1%)              | 1 (<0.1%)              |
| CEFALEXIN                                                          | 0                      | 1 (<0.1%)              | 1 (<0.1%)              |
| CEFAZOLIN SODIUM                                                   | 1 (<0.1%)              | 0                      | 1 (<0.1%)              |
| CILASTATIN SODIUM                                                  | 1 (<0.1%)              | 0                      | 1 (<0.1%)              |
| CLARITHROMYCIN                                                     | 0                      | 1 (<0.1%)              | 1 (<0.1%)              |
| CLINDAMYCIN HYDROCHLORIDE                                          | 1 (<0.1%)              | 0                      | 1 (<0.1%)              |
| CLINDAMYCIN PHOSPHATE                                              | 1 (<0.1%)              | 0                      | 1 (<0.1%)              |
| DEXAMETHASONE                                                      | 1 (<0.1%)              | 0                      | 1 (<0.1%)              |
| DIAZEPAM                                                           | 0                      | 1 (<0.1%)              | 1 (<0.1%)              |
| DIPHENHYDRAMINE HYDROCHLORIDE                                      | 1 (<0.1%)              | 0                      | 1 (<0.1%)              |
| DOXYCYCLINE MONOHYDRATE                                            | 0                      | 1 (<0.1%)              | 1 (<0.1%)              |
| DROSPIRENONE                                                       | 1 (<0.1%)              | 0                      | 1 (<0.1%)              |
| FAMOTIDINE                                                         | 1 (<0.1%)              | 0                      | 1 (<0.1%)              |
| FLUCONAZOLE                                                        | 1 (<0.1%)              | 0                      | 1 (<0.1%)              |
| HYDROCHLOROTHIAZIDE                                                | 1 (<0.1%)              | 0                      | 1 (<0.1%)              |
| HYDROMORPHONE                                                      | 0                      | 1 (<0.1%)              | 1 (<0.1%)              |
| HYDROMORPHONE HYDROCHLORIDE                                        | 0                      | 1 (<0.1%)              | 1 (<0.1%)              |
| IMIPENEM                                                           | 1 (<0.1%)              | 0                      | 1 (<0.1%)              |
| IMMUNOGLOBULIN HUMAN ANTI-RH                                       | 0                      | 1 (<0.1%)              | 1 (<0.1%)              |
| LAMOTRIGINE                                                        | 0                      | 1 (<0.1%)              | 1 (<0.1%)              |
| LEVOFLOXACIN                                                       | 1 (<0.1%)              | 0                      | 1 (<0.1%)              |

**Table 14.1.1 / 39: Number of subjects who took at least one post-treatment medication (FAS)**

| Substance                     | LCS12<br>N=1432 (100%) | LCS16<br>N=1452 (100%) | Total<br>N=2884 (100%) |
|-------------------------------|------------------------|------------------------|------------------------|
| LEVOTHYROXINE SODIUM          | 1 ( <0.1%)             | 0                      | 1 ( <0.1%)             |
| LIDOCAINE                     | 1 ( <0.1%)             | 0                      | 1 ( <0.1%)             |
| METHOTREXATE                  | 0                      | 1 ( <0.1%)             | 1 ( <0.1%)             |
| NORELGESTROMIN                | 0                      | 1 ( <0.1%)             | 1 ( <0.1%)             |
| NORGESTIMATE                  | 0                      | 1 ( <0.1%)             | 1 ( <0.1%)             |
| NORTRIPTYLINE                 | 0                      | 1 ( <0.1%)             | 1 ( <0.1%)             |
| OXYCODONE HYDROCHLORIDE       | 1 ( <0.1%)             | 0                      | 1 ( <0.1%)             |
| PILOCARPINE HYDROCHLORIDE     | 1 ( <0.1%)             | 0                      | 1 ( <0.1%)             |
| PROMETHAZINE                  | 0                      | 1 ( <0.1%)             | 1 ( <0.1%)             |
| PROPOFOL                      | 1 ( <0.1%)             | 0                      | 1 ( <0.1%)             |
| PSEUDOEPHEDRINE HYDROCHLORIDE | 0                      | 1 ( <0.1%)             | 1 ( <0.1%)             |
| ROCURONIUM BROMIDE            | 1 ( <0.1%)             | 0                      | 1 ( <0.1%)             |
| SODIUM CHLORIDE               | 1 ( <0.1%)             | 0                      | 1 ( <0.1%)             |
| SODIUM IODIDE (131 I)         | 1 ( <0.1%)             | 0                      | 1 ( <0.1%)             |
| SULBACTAM                     | 1 ( <0.1%)             | 0                      | 1 ( <0.1%)             |
| SULFAMETHOXAZOLE              | 0                      | 1 ( <0.1%)             | 1 ( <0.1%)             |
| TRIMETHOPRIM                  | 0                      | 1 ( <0.1%)             | 1 ( <0.1%)             |

Note: Multiple substances per drug are possible. Therefore, the same drug may be counted for more than one substance for the same subject

Note: Medications that began after the last day of study drug are included in this table

Global Biostatistics: /by-sasp/patdb/projects/de04209/310442/stat/prod\_interim03/pgms/t-cm.sas epkl 07OCT2011 10:50

End of table



### **14.1.2 Study drug administration and compliance**

**Table 14.1.2 / 1: Number of successful insertions by treatment (FAS)**

|                         | LCS12         | LCS16         | Total         |
|-------------------------|---------------|---------------|---------------|
| Number of insertions    | 1481 (100.0%) | 1509 (100.0%) | 2990 (100.0%) |
| IUS insertion completed |               |               |               |
| no                      | 55 ( 3.7%)    | 64 ( 4.2%)    | 119 ( 4.0%)   |
| yes                     | 1426 ( 96.3%) | 1445 ( 95.8%) | 2871 ( 96.0%) |

Note: Table shows all first and second insertion attempts

Global Biostatistics: /by-sasp/patdb/projects/de04209/310442/stat/prod\_interim03/pgms/t-admin-compl.sas epkl 07OCT2011 10:51

End of table

**Table 14.1.2 / 2: Number of successful first insertion by treatment (FAS)**

|                         | LCS12         | LCS16         | Total         |
|-------------------------|---------------|---------------|---------------|
| Number of insertions    | 1432 (100.0%) | 1452 (100.0%) | 2884 (100.0%) |
| IUS insertion completed |               |               |               |
| no                      | 52 ( 3.6%)    | 62 ( 4.3%)    | 114 ( 4.0%)   |
| yes                     | 1380 ( 96.4%) | 1390 ( 95.7%) | 2770 ( 96.0%) |

Global Biostatistics: /by-sasp/patdb/projects/de04209/310442/stat/prod\_interim03/pgms/t-admin-compl.sas epkl 07OCT2011 10:51

End of table

**Table 14.1.2 / 3: Reason for failure of first insertion by treatment (FAS)**

|                                          | LCS12       | LCS16       | Total        |
|------------------------------------------|-------------|-------------|--------------|
| Number of insertions                     | 52 (100.0%) | 62 (100.0%) | 114 (100.0%) |
| IUS insertion failed, reason             |             |             |              |
| IUS became unsterile                     | 0           | 3 ( 4.8%)   | 3 ( 2.6%)    |
| cervix too tight                         | 3 ( 5.8%)   | 7 ( 11.3%)  | 10 ( 8.8%)   |
| IUS came out immediately after insertion | 14 ( 26.9%) | 23 ( 37.1%) | 37 ( 32.5%)  |
| IUS inserter became unsterile            | 1 ( 1.9%)   | 1 ( 1.6%)   | 2 ( 1.8%)    |
| malfunction of the inserter              | 15 ( 28.8%) | 12 ( 19.4%) | 27 ( 23.7%)  |
| small uterus                             | 1 ( 1.9%)   | 1 ( 1.6%)   | 2 ( 1.8%)    |
| vasovagal attack                         | 0           | 1 ( 1.6%)   | 1 ( 0.9%)    |
| pain                                     | 3 ( 5.8%)   | 0           | 3 ( 2.6%)    |
| position of the uterus                   | 2 ( 3.8%)   | 1 ( 1.6%)   | 3 ( 2.6%)    |
| other                                    | 13 ( 25.0%) | 13 ( 21.0%) | 26 ( 22.8%)  |

Global Biostatistics: /by-sasp/patdb/projects/de04209/310442/stat/prod\_interim03/pgms/t-admin-compl.sas epkll 07OCT2011 10:51  
 End of table

**Table 14.1.2 / 4: Listing of specified 'other' reason for not completed first insertion attempt by treatment and subject (FAS)**

| TREATMENT | Subject number | IUS insertion failed, reason                            | IUS insertion failed, other reason                                                                    |                                                       |
|-----------|----------------|---------------------------------------------------------|-------------------------------------------------------------------------------------------------------|-------------------------------------------------------|
| LCS12     | 140229         | .                                                       | N/A                                                                                                   |                                                       |
|           | 161539         | other                                                   | IUD WAS NOT IN SITU                                                                                   |                                                       |
|           | 200223         | other                                                   | PULLED OUT LCS WITH SISCORS                                                                           |                                                       |
|           | 240715         | other                                                   | THE STRING WOULD NOT RELEASE FROM INSIDE THE INSERTER. THE END WOULD NOT DISENGAGE FROM THE INSERTER. |                                                       |
|           | 240719         | other                                                   | THE STRINGS WOULD NOT RELEASE OR SLIDE THROUGH THE INSERTER                                           |                                                       |
|           | 241015         | other                                                   | NOT INSERTED DEEP ENOUGH                                                                              |                                                       |
|           | 241019         | other                                                   | NOT FAR ENOUGH INTO UTERUS                                                                            |                                                       |
|           | 241531         | other                                                   | IUD LOW ON SONOGRAM, THUS REMOVED AND REPLACED                                                        |                                                       |
|           | 241536         | other                                                   | PLACEMENT TOO LOW                                                                                     |                                                       |
|           | 241707         | other                                                   | SHARPLY ANTEVERTED UTERUS                                                                             |                                                       |
|           | 241721         | other                                                   | IUS APPLICATOR BROKE DURING PLACEMENT                                                                 |                                                       |
|           | 243952         | other                                                   | INSERTION PROVED TO BE DIFFICULT                                                                      |                                                       |
|           | 244417         | other                                                   | SCISSORS CUT ONLY 1 OF 2 STRINGS, IUD PULLED OUT WHEN WITHDRAWN                                       |                                                       |
|           | 244422         | other                                                   | PINK BOTTON DIDN'T CLICK AT THE END OF INSERTION                                                      |                                                       |
|           | LCS16          | 150117                                                  | other                                                                                                 | NOTE:THE IUS #12673 WAS INSERTED ONLY INTO THE CERVIX |
|           |                | 200405                                                  | IUS came out immediately after insertion                                                              | TOO LOW, THERE FORE REMOVED                           |
|           |                | 230105                                                  | other                                                                                                 | THREADS SPONTANEOUSLY GOT LOOSE                       |
| 240126    |                | other                                                   | INSERTER INADVERTENTLY PULLED OUT THE IUS DUE TO THE STRING GOT CAUGHT IN THE HINGE OF THE SCISSORS.  |                                                       |
| 240404    |                | other                                                   | 1ST INSERTION ATTEMPTED, 1ST IUD BENT, SECOND ONE USED                                                |                                                       |
| 240602    |                | other                                                   | ULTRASOUND OF FIRST ATTEMPT INDICATED THAT THE IUS WAS NOT LOCATED IN THE FUNDUS. DEVICE WAS REMOVED  |                                                       |
| 241535    |                | other                                                   | SLIGHTLY TOO LOW                                                                                      |                                                       |
| 242104    |                | other                                                   | CERVICAL PLACEMENT                                                                                    |                                                       |
| 242808    |                | other                                                   | DURING ULTRASOUND - IUS TOO LOW IN CERVICAL CANAL                                                     |                                                       |
| 243928    |                | other                                                   | SLIDER MOVED BACK TO QUICKLY & TO FAR TO ALLOW PROPER INSERTION IN CAVITY                             |                                                       |
| 244405    |                | other                                                   | DISPLACED CERVICAL CANAL                                                                              |                                                       |
| 244449    | other          | PHYSICIAN NOT SATISFIED WITH PLACEMENT                  |                                                                                                       |                                                       |
| 244916    | other          | ULTRASOUND SHOWED IUD DISPLACED                         |                                                                                                       |                                                       |
| 246209    | other          | IUD WAS ACCIDENTLY PULLED OUT WHEN TRIMMING IUD STRING. |                                                                                                       |                                                       |

Global Biostatistics: /by-sasp/patdb/projects/de04209/310442/stat/prod\_interim03/pgms/t-admin-compl.sas epkll 07OCT2011 10:51

End of table

**Table 14.1.2 / 5: Number of successful second insertion by treatment (FAS)**

|                         | LCS12       | LCS16       | Total        |
|-------------------------|-------------|-------------|--------------|
| Number of insertions    | 49 (100.0%) | 57 (100.0%) | 106 (100.0%) |
| IUS insertion completed |             |             |              |
| no                      | 3 ( 6.1%)   | 2 ( 3.5%)   | 5 ( 4.7%)    |
| yes                     | 46 ( 93.9%) | 55 ( 96.5%) | 101 ( 95.3%) |

Global Biostatistics: /by-sasp/patdb/projects/de04209/310442/stat/prod\_interim03/pgms/t-admin-compl.sas epkll 07OCT2011 10:51

End of table

**Table 14.1.2 / 6: Reason for failure of second insertion by treatment (FAS)**

|                                          | LCS12      | LCS16      | Total      |
|------------------------------------------|------------|------------|------------|
| Number of insertions                     | 3 (100.0%) | 2 (100.0%) | 5 (100.0%) |
| IUS insertion failed, reason             |            |            |            |
| missing                                  | 1 ( 33.3%) | 0          | 1 ( 20.0%) |
| cervix too tight                         | 0          | 1 ( 50.0%) | 1 ( 20.0%) |
| IUS came out immediately after insertion | 1 ( 33.3%) | 0          | 1 ( 20.0%) |
| malfunction of the inserter              | 0          | 1 ( 50.0%) | 1 ( 20.0%) |
| small uterus                             | 1 ( 33.3%) | 0          | 1 ( 20.0%) |

Global Biostatistics: /by-sasp/patdb/projects/de04209/310442/stat/prod\_interim03/pgms/t-admin-compl.sas epkl 07OCT2011 10:51  
 End of table

**Table 14.1.2 / 7: Listing of specified 'other' reason for not completed second insertion attempt by treatment and subject (FAS)**

| TREATMENT         | Subject number | IUS insertion failed, reason | IUS insertion failed, other reason |
|-------------------|----------------|------------------------------|------------------------------------|
| NO DATA AVAILABLE |                |                              |                                    |

Global Biostatistics: /by-sasp/patdb/projects/de04209/310442/stat/prod\_interim03/pgms/t-admin-compl.sas epkl 07OCT2011 10:51  
End of table



**Table 14.1.2 / 8: Sound depth of the uterus by treatment (FAS)**

|              |      | TREATMENT | n    | Nmiss | Mean | SD   | Min | Q1   | Median | Q3   | Max  |
|--------------|------|-----------|------|-------|------|------|-----|------|--------|------|------|
| Uterus depth | (cm) | LCS12     | 1426 | 6     | 7.27 | 0.89 | 2.0 | 7.00 | 7.00   | 8.00 | 11.0 |
|              |      | LCS16     | 1450 | 2     | 7.23 | 0.91 | 2.0 | 7.00 | 7.00   | 8.00 | 11.0 |
|              |      | Total     | 2876 | 8     | 7.25 | 0.90 | 2.0 | 7.00 | 7.00   | 8.00 | 11.0 |

Global Biostatistics: /by-sasp/patdb/projects/de04209/310442/stat/prod\_interim03/pgms/t-admin-compl.sas epkll 07OCT2011 10:51  
 End of table

**Table 14.1.2 / 9: Position of the uterus by treatment (FAS)**

|                      | LCS12         | LCS16         | Total         |
|----------------------|---------------|---------------|---------------|
| Number of insertions | 1432 (100.0%) | 1452 (100.0%) | 2884 (100.0%) |
| Uterus position      |               |               |               |
| anteversion          | 959 ( 67.0%)  | 968 ( 66.7%)  | 1927 ( 66.8%) |
| mid position         | 248 ( 17.3%)  | 247 ( 17.0%)  | 495 ( 17.2%)  |
| retroversion         | 221 ( 15.4%)  | 233 ( 16.0%)  | 454 ( 15.7%)  |
| other                | 4 ( 0.3%)     | 4 ( 0.3%)     | 8 ( 0.3%)     |

Global Biostatistics: /by-sasp/patdb/projects/de04209/310442/stat/prod\_interim03/pgms/t-admin-compl.sas epkll 07OCT2011 10:51

End of table

**Table 14.1.2 / 10: Investigator's evaluation of IUS insertion procedure by treatment (FAS)**

|                                   | LCS12         | LCS16         | Total         |
|-----------------------------------|---------------|---------------|---------------|
| Number of insertions              | 1432 (100.0%) | 1452 (100.0%) | 2884 (100.0%) |
| IUS insertion, general assessment |               |               |               |
| easy                              | 1283 ( 89.6%) | 1302 ( 89.7%) | 2585 ( 89.6%) |
| slightly difficult                | 131 ( 9.1%)   | 132 ( 9.1%)   | 263 ( 9.1%)   |
| very difficult                    | 18 ( 1.3%)    | 18 ( 1.2%)    | 36 ( 1.2%)    |

Global Biostatistics: /by-sasp/patdb/projects/de04209/310442/stat/prod\_interim03/pgms/t-admin-compl.sas epklI 07OCT2011 10:51  
 End of table

**Table 14.1.2 / 11: Investigator's evaluation of IUS insertion procedure by dilatation performed (yes/no) and treatment (FAS)**

|                                | LCS12         | LCS16         | Total         |
|--------------------------------|---------------|---------------|---------------|
| Number of insertions           | 1432 (100.0%) | 1452 (100.0%) | 2884 (100.0%) |
| IUS insertion, dilatation used |               |               |               |
| no                             | 1355 ( 94.6%) | 1370 ( 94.4%) | 2725 ( 94.5%) |
| - of these: easy               | 1247 ( 92.0%) | 1261 ( 92.0%) | 2508 ( 92.0%) |
| slightly difficult             | 100 ( 7.4%)   | 101 ( 7.4%)   | 201 ( 7.4%)   |
| very difficult                 | 8 ( 0.6%)     | 8 ( 0.6%)     | 16 ( 0.6%)    |
| yes                            | 77 ( 5.4%)    | 82 ( 5.6%)    | 159 ( 5.5%)   |
| - of these: easy               | 36 ( 46.8%)   | 41 ( 50.0%)   | 77 ( 48.4%)   |
| slightly difficult             | 31 ( 40.3%)   | 31 ( 37.8%)   | 62 ( 39.0%)   |
| very difficult                 | 10 ( 13.0%)   | 10 ( 12.2%)   | 20 ( 12.6%)   |

Global Biostatistics: /by-sasp/patdb/projects/de04209/310442/stat/prod\_interim03/pgms/t-admin-compl.sas epkll 07OCT2011 10:51  
 End of table

**Table 14.1.2 / 12: Investigator's evaluation of IUS insertion procedure by parity (0 births vs. 1 or more) and treatment (FAS)**

|                    | LCS12         | LCS16         | Total         |
|--------------------|---------------|---------------|---------------|
| Number of subjects | 1432 (100.0%) | 1452 (100.0%) | 2884 (100.0%) |
| Parity             |               |               |               |
| 0 births           | 556 ( 38.8%)  | 574 ( 39.5%)  | 1130 ( 39.2%) |
| - of these: easy   | 468 ( 84.2%)  | 484 ( 84.3%)  | 952 ( 84.2%)  |
| slightly difficult | 76 ( 13.7%)   | 78 ( 13.6%)   | 154 ( 13.6%)  |
| very difficult     | 12 ( 2.2%)    | 12 ( 2.1%)    | 24 ( 2.1%)    |
| 1 birth or more    | 876 ( 61.2%)  | 878 ( 60.5%)  | 1754 ( 60.8%) |
| - of these: easy   | 815 ( 93.0%)  | 818 ( 93.2%)  | 1633 ( 93.1%) |
| slightly difficult | 55 ( 6.3%)    | 54 ( 6.2%)    | 109 ( 6.2%)   |
| very difficult     | 6 ( 0.7%)     | 6 ( 0.7%)     | 12 ( 0.7%)    |

Global Biostatistics: /by-sasp/patdb/projects/de04209/310442/stat/prod\_interim03/pgms/t-admin-compl.sas epkl 07OCT2011 10:51  
 End of table

**Table 14.1.2 / 13: Subject's evaluation of pain during the IUS insertion procedure by treatment (FAS)**

|                      | LCS12         | LCS16         | Total         |
|----------------------|---------------|---------------|---------------|
| Number of insertions | 1432 (100.0%) | 1452 (100.0%) | 2884 (100.0%) |
| IUS insertion, pain  |               |               |               |
| missing              | 0             | 1 (<0.1%)     | 1 (<0.1%)     |
| none                 | 295 ( 20.6%)  | 268 ( 18.5%)  | 563 ( 19.5%)  |
| mild                 | 629 ( 43.9%)  | 683 ( 47.0%)  | 1312 ( 45.5%) |
| moderate             | 390 ( 27.2%)  | 400 ( 27.5%)  | 790 ( 27.4%)  |
| severe               | 118 ( 8.2%)   | 100 ( 6.9%)   | 218 ( 7.6%)   |

Global Biostatistics: /by-sasp/patdb/projects/de04209/310442/stat/prod\_interim03/pgms/t-admin-compl.sas epkll 07OCT2011 10:51  
 End of table

**Table 14.1.2 / 14: Subject's evaluation of pain during the IUS insertion procedure by dilatation performed (yes/no) and treatment (FAS)**

|                                | LCS12         | LCS16         | Total         |
|--------------------------------|---------------|---------------|---------------|
| Number of insertions           | 1432 (100.0%) | 1452 (100.0%) | 2884 (100.0%) |
| IUS insertion, dilatation used |               |               |               |
| no                             | 1355 ( 94.6%) | 1370 ( 94.4%) | 2725 ( 94.5%) |
| - of these: missing            | 0             | 1 (<0.1%)     | 1 (<0.1%)     |
| none                           | 291 ( 21.5%)  | 265 ( 19.3%)  | 556 ( 20.4%)  |
| mild                           | 605 ( 44.6%)  | 658 ( 48.0%)  | 1263 ( 46.3%) |
| moderate                       | 353 ( 26.1%)  | 356 ( 26.0%)  | 709 ( 26.0%)  |
| severe                         | 106 (  7.8%)  | 90 (  6.6%)   | 196 (  7.2%)  |
| yes                            | 77 (  5.4%)   | 82 (  5.6%)   | 159 (  5.5%)  |
| - of these: none               | 4 (  5.2%)    | 3 (  3.7%)    | 7 (  4.4%)    |
| mild                           | 24 ( 31.2%)   | 25 ( 30.5%)   | 49 ( 30.8%)   |
| moderate                       | 37 ( 48.1%)   | 44 ( 53.7%)   | 81 ( 50.9%)   |
| severe                         | 12 ( 15.6%)   | 10 ( 12.2%)   | 22 ( 13.8%)   |

Global Biostatistics: /by-sasp/patdb/projects/de04209/310442/stat/prod\_interim03/pgms/t-admin-compl.sas epkll 07OCT2011 10:51

End of table

**Table 14.1.2 / 15: Subject's evaluation of pain during IUS insertion procedure by parity (0 births vs. 1 or more) and treatment (FAS)**

|                      | LCS12         | LCS16         | Total         |
|----------------------|---------------|---------------|---------------|
| Number of insertions | 1432 (100.0%) | 1452 (100.0%) | 2884 (100.0%) |
| Parity               |               |               |               |
| 0 births             | 556 ( 38.8%)  | 574 ( 39.5%)  | 1130 ( 39.2%) |
| - of these: missing  | 0             | 1 ( 0.2%)     | 1 ( <0.1%)    |
| none                 | 40 ( 7.2%)    | 29 ( 5.1%)    | 69 ( 6.1%)    |
| mild                 | 178 ( 32.0%)  | 225 ( 39.2%)  | 403 ( 35.7%)  |
| moderate             | 246 ( 44.2%)  | 236 ( 41.1%)  | 482 ( 42.7%)  |
| severe               | 92 ( 16.5%)   | 83 ( 14.5%)   | 175 ( 15.5%)  |
| 1 birth or more      | 876 ( 61.2%)  | 878 ( 60.5%)  | 1754 ( 60.8%) |
| - of these: none     | 255 ( 29.1%)  | 239 ( 27.2%)  | 494 ( 28.2%)  |
| mild                 | 451 ( 51.5%)  | 458 ( 52.2%)  | 909 ( 51.8%)  |
| moderate             | 144 ( 16.4%)  | 164 ( 18.7%)  | 308 ( 17.6%)  |
| severe               | 26 ( 3.0%)    | 17 ( 1.9%)    | 43 ( 2.5%)    |

Global Biostatistics: /by-sasp/patdb/projects/de04209/310442/stat/prod\_interim03/pgms/t-admin-compl.sas epkll 07OCT2011 10:51

End of table



**Table 14.1.2 / 16: Number of subjects with dilatation performed including 'when' by treatment (FAS)**

|                                       | LCS12         | LCS16         | Total         |
|---------------------------------------|---------------|---------------|---------------|
| Number of insertions                  | 1432 (100.0%) | 1452 (100.0%) | 2884 (100.0%) |
| IUS insertion, dilatation used        |               |               |               |
| no                                    | 1355 ( 94.6%) | 1370 ( 94.4%) | 2725 ( 94.5%) |
| missing                               | 1355 ( 94.6%) | 1369 ( 94.3%) | 2724 ( 94.5%) |
| before procedure was performed        | 0             | 1 (<0.1%)     | 1 (<0.1%)     |
| yes                                   | 77 ( 5.4%)    | 82 ( 5.6%)    | 159 ( 5.5%)   |
| before procedure was performed        | 54 ( 3.8%)    | 51 ( 3.5%)    | 105 ( 3.6%)   |
| when procedure proved to be difficult | 22 ( 1.5%)    | 31 ( 2.1%)    | 53 ( 1.8%)    |
| when procedure proved to be painful   | 1 (<0.1%)     | 0             | 1 (<0.1%)     |

Global Biostatistics: /by-sasp/patdb/projects/de04209/310442/stat/prod\_interim03/pgms/t-admin-compl.sas epkll 07OCT2011 10:51  
 End of table

**Table 14.1.2 / 17: Hegar size used by treatment (FAS)**

|            | TREATMENT      | n  | Nmiss | Mean | SD  | Min | Q1  | Median | Q3  | Max |
|------------|----------------|----|-------|------|-----|-----|-----|--------|-----|-----|
| Hegar size | LCS12 (N=1432) | 40 | 37    | 5.1  | 3.0 | 1   | 3.0 | 4.0    | 5.0 | 14  |
|            | LCS16 (N=1452) | 49 | 33    | 5.6  | 3.5 | 1   | 4.0 | 4.0    | 5.0 | 14  |
|            | Total (N=2884) | 89 | 70    | 5.3  | 3.3 | 1   | 4.0 | 4.0    | 5.0 | 14  |

Global Biostatistics: /by-sasp/patdb/projects/de04209/310442/stat/prod\_interim03/pgms/t-admin-compl.sas epkl 07OCT2011 10:51  
 End of table

**Table 14.1.2 / 18: Number of subjects with dilatation performed including 'when' by parity and treatment (FAS)**

| Parity                                |                                       | LCS12                | LCS16        | Total         |
|---------------------------------------|---------------------------------------|----------------------|--------------|---------------|
| 0 births                              | Number of insertions                  | 556 (100.0%)         | 574 (100.0%) | 1130 (100.0%) |
|                                       | IUS insertion, dilatation used        |                      |              |               |
|                                       | no                                    | 505 ( 90.8%)         | 521 ( 90.8%) | 1026 ( 90.8%) |
|                                       | missing                               | 505 ( 90.8%)         | 520 ( 90.6%) | 1025 ( 90.7%) |
|                                       | before procedure was performed        | 0                    | 1 ( 0.2%)    | 1 (<0.1%)     |
|                                       | yes                                   | 51 ( 9.2%)           | 53 ( 9.2%)   | 104 ( 9.2%)   |
|                                       | before procedure was performed        | 36 ( 6.5%)           | 31 ( 5.4%)   | 67 ( 5.9%)    |
|                                       | when procedure proved to be difficult | 14 ( 2.5%)           | 22 ( 3.8%)   | 36 ( 3.2%)    |
|                                       | when procedure proved to be painful   | 1 ( 0.2%)            | 0            | 1 (<0.1%)     |
|                                       | 1 birth or more                       | Number of insertions | 876 (100.0%) | 878 (100.0%)  |
| IUS insertion, dilatation used        |                                       |                      |              |               |
| no                                    |                                       | 850 ( 97.0%)         | 849 ( 96.7%) | 1699 ( 96.9%) |
| missing                               |                                       | 850 ( 97.0%)         | 849 ( 96.7%) | 1699 ( 96.9%) |
| before procedure was performed        |                                       | 0                    | 0            | 0             |
| yes                                   |                                       | 26 ( 3.0%)           | 29 ( 3.3%)   | 55 ( 3.1%)    |
| before procedure was performed        |                                       | 18 ( 2.1%)           | 20 ( 2.3%)   | 38 ( 2.2%)    |
| when procedure proved to be difficult |                                       | 8 ( 0.9%)            | 9 ( 1.0%)    | 17 ( 1.0%)    |
| when procedure proved to be painful   |                                       | 0                    | 0            | 0             |

Global Biostatistics: /by-sasp/patdb/projects/de04209/310442/stat/prod\_interim03/pgms/t-admin-compl.sas epkll 07OCT2011 10:51  
 End of table

**Table 14.1.2 / 19: Number of subjects with local anesthesia given including 'when' by treatment (FAS)**

|                                       | LCS12         | LCS16         | Total         |
|---------------------------------------|---------------|---------------|---------------|
| Number of subjects                    | 1432 (100.0%) | 1452 (100.0%) | 2884 (100.0%) |
| Local anesthesia administered         |               |               |               |
| missing                               | 1 (<0.1%)     | 0             | 1 (<0.1%)     |
| no                                    | 1306 ( 91.2%) | 1318 ( 90.8%) | 2624 ( 91.0%) |
| yes                                   | 125 ( 8.7%)   | 134 ( 9.2%)   | 259 ( 9.0%)   |
| before procedure was performed        | 120 ( 8.4%)   | 128 ( 8.8%)   | 248 ( 8.6%)   |
| when procedure proved to be difficult | 1 (<0.1%)     | 6 ( 0.4%)     | 7 ( 0.2%)     |
| when procedure proved to be painful   | 4 ( 0.3%)     | 0             | 4 ( 0.1%)     |

Global Biostatistics: /by-sasp/patdb/projects/de04209/310442/stat/prod\_interim03/pgms/t-admin-compl.sas epkll 07OCT2011 10:51

End of table

**Table 14.1.2 / 20: Number of subjects with local anesthesia given including 'when' by parity and treatment (FAS)**

| Parity          |                                       | LCS12        | LCS16        | Total         |
|-----------------|---------------------------------------|--------------|--------------|---------------|
| 0 births        | Number of subjects                    | 556 (100.0%) | 574 (100.0%) | 1130 (100.0%) |
|                 | Local anesthesia administered         |              |              |               |
|                 | missing                               | 0            | 0            | 0             |
|                 | no                                    | 477 ( 85.8%) | 480 ( 83.6%) | 957 ( 84.7%)  |
|                 | yes                                   | 79 ( 14.2%)  | 94 ( 16.4%)  | 173 ( 15.3%)  |
|                 | before procedure was performed        | 75 ( 13.5%)  | 89 ( 15.5%)  | 164 ( 14.5%)  |
|                 | when procedure proved to be difficult | 1 ( 0.2%)    | 5 ( 0.9%)    | 6 ( 0.5%)     |
|                 | when procedure proved to be painful   | 3 ( 0.5%)    | 0            | 3 ( 0.3%)     |
| 1 birth or more | Number of subjects                    | 876 (100.0%) | 878 (100.0%) | 1754 (100.0%) |
|                 | Local anesthesia administered         |              |              |               |
|                 | missing                               | 1 ( 0.1%)    | 0            | 1 ( <0.1%)    |
|                 | no                                    | 829 ( 94.6%) | 838 ( 95.4%) | 1667 ( 95.0%) |
|                 | yes                                   | 46 ( 5.3%)   | 40 ( 4.6%)   | 86 ( 4.9%)    |
|                 | before procedure was performed        | 45 ( 5.1%)   | 39 ( 4.4%)   | 84 ( 4.8%)    |
|                 | when procedure proved to be difficult | 0            | 1 ( 0.1%)    | 1 ( <0.1%)    |
|                 | when procedure proved to be painful   | 1 ( 0.1%)    | 0            | 1 ( <0.1%)    |

Global Biostatistics: /by-sasp/patdb/projects/de04209/310442/stat/prod\_interim03/pgms/t-admin-compl.sas epkll 07OCT2011 10:51  
 End of table

**Table 14.1.2 / 21: Number of subjects with analgesics given including 'when' by treatment (FAS)**

|                                       | LCS12         | LCS16         | Total         |
|---------------------------------------|---------------|---------------|---------------|
| Number of subjects                    | 1432 (100.0%) | 1452 (100.0%) | 2884 (100.0%) |
| Analgetics administered               |               |               |               |
| no                                    | 934 ( 65.2%)  | 950 ( 65.4%)  | 1884 ( 65.3%) |
| yes                                   | 498 ( 34.8%)  | 502 ( 34.6%)  | 1000 ( 34.7%) |
| missing                               | 1 ( <0.1%)    | 0             | 1 ( <0.1%)    |
| before procedure was performed        | 463 ( 32.3%)  | 466 ( 32.1%)  | 929 ( 32.2%)  |
| when procedure proved to be difficult | 2 ( 0.1%)     | 2 ( 0.1%)     | 4 ( 0.1%)     |
| when procedure proved to be painful   | 32 ( 2.2%)    | 34 ( 2.3%)    | 66 ( 2.3%)    |

Global Biostatistics: /by-sasp/patdb/projects/de04209/310442/stat/prod\_interim03/pgms/t-admin-compl.sas epkll 07OCT2011 10:51

End of table

**Table 14.1.2 / 22: Number of subjects with analgesics given including 'when' by parity and treatment (FAS)**

| Parity                                |                                       | LCS12                   | LCS16        | Total         |               |
|---------------------------------------|---------------------------------------|-------------------------|--------------|---------------|---------------|
| 0 births                              | Number of subjects                    | 556 (100.0%)            | 574 (100.0%) | 1130 (100.0%) |               |
|                                       | Analgetics administered               |                         |              |               |               |
|                                       | no                                    | 255 ( 45.9%)            | 272 ( 47.4%) | 527 ( 46.6%)  |               |
|                                       | yes                                   | 301 ( 54.1%)            | 302 ( 52.6%) | 603 ( 53.4%)  |               |
|                                       | missing                               | 1 ( 0.2%)               | 0            | 1 ( <0.1%)    |               |
|                                       | before procedure was performed        | 271 ( 48.7%)            | 278 ( 48.4%) | 549 ( 48.6%)  |               |
|                                       | when procedure proved to be difficult | 2 ( 0.4%)               | 2 ( 0.3%)    | 4 ( 0.4%)     |               |
|                                       | when procedure proved to be painful   | 27 ( 4.9%)              | 22 ( 3.8%)   | 49 ( 4.3%)    |               |
|                                       | 1 birth or more                       | Number of subjects      | 876 (100.0%) | 878 (100.0%)  | 1754 (100.0%) |
|                                       |                                       | Analgetics administered |              |               |               |
| no                                    |                                       | 679 ( 77.5%)            | 678 ( 77.2%) | 1357 ( 77.4%) |               |
| yes                                   |                                       | 197 ( 22.5%)            | 200 ( 22.8%) | 397 ( 22.6%)  |               |
| missing                               |                                       | 0                       | 0            | 0             |               |
| before procedure was performed        |                                       | 192 ( 21.9%)            | 188 ( 21.4%) | 380 ( 21.7%)  |               |
| when procedure proved to be difficult |                                       | 0                       | 0            | 0             |               |
| when procedure proved to be painful   |                                       | 5 ( 0.6%)               | 12 ( 1.4%)   | 17 ( 1.0%)    |               |

Global Biostatistics: /by-sasp/patdb/projects/de04209/310442/stat/prod\_interim03/pgms/t-admin-compl.sas epkll 07OCT2011 10:51  
 End of table

**Table 14.1.2 / 23: Number of subjects with other medication given including 'when' by treatment (FAS)**

|                                       | LCS12         | LCS16         | Total         |
|---------------------------------------|---------------|---------------|---------------|
| Number of subjects                    | 1432 (100.0%) | 1452 (100.0%) | 2884 (100.0%) |
| Other medication administered         |               |               |               |
| no                                    | 1371 ( 95.7%) | 1391 ( 95.8%) | 2762 ( 95.8%) |
| yes                                   | 61 ( 4.3%)    | 61 ( 4.2%)    | 122 ( 4.2%)   |
| before procedure was performed        | 48 ( 3.4%)    | 51 ( 3.5%)    | 99 ( 3.4%)    |
| when procedure proved to be difficult | 1 ( <0.1%)    | 4 ( 0.3%)     | 5 ( 0.2%)     |
| when procedure proved to be painful   | 12 ( 0.8%)    | 6 ( 0.4%)     | 18 ( 0.6%)    |

Global Biostatistics: /by-sasp/patdb/projects/de04209/310442/stat/prod\_interim03/pgms/t-admin-compl.sas epkll 07OCT2011 10:51  
 End of table



**Table 14.1.2 / 24: IUS detectable by ultrasound by time point and treatment (FAS)**

| Time key first level |                              | LCS12         | LCS16         | Total         |
|----------------------|------------------------------|---------------|---------------|---------------|
| Baseline             | Number of subjects           | 1428 (100.0%) | 1447 (100.0%) | 2875 (100.0%) |
|                      | IUS detectable by ultrasound |               |               |               |
|                      | no                           | 4 ( 0.3%)     | 1 (<0.1%)     | 5 ( 0.2%)     |
|                      | yes                          | 1424 (>99.7%) | 1446 (>99.9%) | 2870 ( 99.8%) |
| Month 3              | Number of subjects           | 1337 (100.0%) | 1353 (100.0%) | 2690 (100.0%) |
|                      | IUS detectable by ultrasound |               |               |               |
|                      | no                           | 3 ( 0.2%)     | 2 ( 0.1%)     | 5 ( 0.2%)     |
|                      | yes                          | 1334 ( 99.8%) | 1351 ( 99.9%) | 2685 ( 99.8%) |
| Month 6              | Number of subjects           | 1235 (100.0%) | 1278 (100.0%) | 2513 (100.0%) |
|                      | IUS detectable by ultrasound |               |               |               |
|                      | no                           | 0             | 1 (<0.1%)     | 1 (<0.1%)     |
|                      | yes                          | 1235 (100.0%) | 1277 (>99.9%) | 2512 (>99.9%) |
| Month 9              | Number of subjects           | 1174 (100.0%) | 1215 (100.0%) | 2389 (100.0%) |
|                      | IUS detectable by ultrasound |               |               |               |
|                      | no                           | 1 (<0.1%)     | 1 (<0.1%)     | 2 (<0.1%)     |
|                      | yes                          | 1173 (>99.9%) | 1214 (>99.9%) | 2387 (>99.9%) |
| Month 12             | Number of subjects           | 1133 (100.0%) | 1177 (100.0%) | 2310 (100.0%) |
|                      | IUS detectable by ultrasound |               |               |               |
|                      | no                           | 1 (<0.1%)     | 0             | 1 (<0.1%)     |
|                      | yes                          | 1132 (>99.9%) | 1177 (100.0%) | 2309 (>99.9%) |
| Month 18             | Number of subjects           | 1039 (100.0%) | 1074 (100.0%) | 2113 (100.0%) |
|                      | IUS detectable by ultrasound |               |               |               |
|                      | no                           | 1 (<0.1%)     | 0             | 1 (<0.1%)     |
|                      | yes                          | 1038 (>99.9%) | 1074 (100.0%) | 2112 (>99.9%) |

**Table 14.1.2 / 24: IUS detectable by ultrasound by time point and treatment (FAS)**

| Time key first level  |                              | LCS12         | LCS16         | Total         |
|-----------------------|------------------------------|---------------|---------------|---------------|
| Month 24              | Number of subjects           | 929 (100.0%)  | 984 (100.0%)  | 1913 (100.0%) |
|                       | IUS detectable by ultrasound |               |               |               |
|                       | no                           | 0             | 0             | 0             |
| yes                   | 929 (100.0%)                 | 984 (100.0%)  | 1913 (100.0%) |               |
| Month 30              | Number of subjects           | 851 (100.0%)  | 901 (100.0%)  | 1752 (100.0%) |
|                       | IUS detectable by ultrasound |               |               |               |
|                       | no                           | 1 ( 0.1%)     | 1 ( 0.1%)     | 2 ( 0.1%)     |
| yes                   | 850 ( 99.9%)                 | 900 ( 99.9%)  | 1750 ( 99.9%) |               |
| End of study-Month 36 | Number of subjects           | 1326 (100.0%) | 1344 (100.0%) | 2670 (100.0%) |
|                       | IUS detectable by ultrasound |               |               |               |
|                       | no                           | 49 ( 3.7%)    | 38 ( 2.8%)    | 87 ( 3.3%)    |
| yes                   | 1277 ( 96.3%)                | 1306 ( 97.2%) | 2583 ( 96.7%) |               |

Global Biostatistics: /by-sasp/patdb/projects/de04209/310442/stat/prod\_interim03/pgms/t-admin-compl.sas epkl 07OCT2011 10:51

End of table

**Table 14.1.2 / 25: IUS location by ultrasound by time point and treatment (FAS)**

| Time key first level |                           | LCS12         | LCS16         | Total         |
|----------------------|---------------------------|---------------|---------------|---------------|
| Baseline             | Number of subjects        | 1429 (100.0%) | 1448 (100.0%) | 2877 (100.0%) |
|                      | IUS location              |               |               |               |
|                      | missing                   | 3 ( 0.2%)     | 1 (<0.1%)     | 4 ( 0.1%)     |
|                      | in situ                   | 1415 ( 99.0%) | 1437 ( 99.2%) | 2852 ( 99.1%) |
|                      | displaced, cervical canal | 0             | 4 ( 0.3%)     | 4 ( 0.1%)     |
|                      | displaced, intrauterin    | 9 ( 0.6%)     | 5 ( 0.3%)     | 14 ( 0.5%)    |
|                      | expelled in vagina        | 0             | 1 (<0.1%)     | 1 (<0.1%)     |
|                      | myometrial perforation    | 0             | 0             | 0             |
|                      | absent                    | 1 (<0.1%)     | 0             | 1 (<0.1%)     |
|                      | other                     | 1 (<0.1%)     | 0             | 1 (<0.1%)     |
| Month 3              | Number of subjects        | 1341 (100.0%) | 1355 (100.0%) | 2696 (100.0%) |
|                      | IUS location              |               |               |               |
|                      | missing                   | 5 ( 0.4%)     | 2 ( 0.1%)     | 7 ( 0.3%)     |
|                      | in situ                   | 1324 ( 98.7%) | 1336 ( 98.6%) | 2660 ( 98.7%) |
|                      | displaced, cervical canal | 2 ( 0.1%)     | 6 ( 0.4%)     | 8 ( 0.3%)     |
|                      | displaced, intrauterin    | 8 ( 0.6%)     | 9 ( 0.7%)     | 17 ( 0.6%)    |
|                      | expelled in vagina        | 0             | 0             | 0             |
|                      | myometrial perforation    | 0             | 0             | 0             |
|                      | absent                    | 2 ( 0.1%)     | 1 (<0.1%)     | 3 ( 0.1%)     |
|                      | other                     | 0             | 1 (<0.1%)     | 1 (<0.1%)     |
| Month 6              | Number of subjects        | 1239 (100.0%) | 1284 (100.0%) | 2523 (100.0%) |
|                      | IUS location              |               |               |               |
|                      | missing                   | 4 ( 0.3%)     | 6 ( 0.5%)     | 10 ( 0.4%)    |
|                      | in situ                   | 1225 ( 98.9%) | 1259 ( 98.1%) | 2484 ( 98.5%) |
|                      | displaced, cervical canal | 3 ( 0.2%)     | 7 ( 0.5%)     | 10 ( 0.4%)    |
|                      | displaced, intrauterin    | 7 ( 0.6%)     | 11 ( 0.9%)    | 18 ( 0.7%)    |
|                      | expelled in vagina        | 0             | 0             | 0             |
|                      | myometrial perforation    | 0             | 0             | 0             |
|                      | absent                    | 0             | 1 (<0.1%)     | 1 (<0.1%)     |
|                      | other                     | 0             | 0             | 0             |

**Table 14.1.2 / 25: IUS location by ultrasound by time point and treatment (FAS)**

| Time key first level |                           | LCS12         | LCS16         | Total         |
|----------------------|---------------------------|---------------|---------------|---------------|
| Month 9              | Number of subjects        | 1176 (100.0%) | 1219 (100.0%) | 2395 (100.0%) |
|                      | IUS location              |               |               |               |
|                      | missing                   | 3 ( 0.3%)     | 5 ( 0.4%)     | 8 ( 0.3%)     |
|                      | in situ                   | 1158 ( 98.5%) | 1196 ( 98.1%) | 2354 ( 98.3%) |
|                      | displaced, cervical canal | 6 ( 0.5%)     | 3 ( 0.2%)     | 9 ( 0.4%)     |
|                      | displaced, intrauterin    | 8 ( 0.7%)     | 15 ( 1.2%)    | 23 ( 1.0%)    |
|                      | expelled in vagina        | 0             | 0             | 0             |
|                      | myometrial perforation    | 0             | 0             | 0             |
|                      | absent                    | 0             | 0             | 0             |
|                      | other                     | 1 ( <0.1%)    | 0             | 1 ( <0.1%)    |
| Month 12             | Number of subjects        | 1135 (100.0%) | 1179 (100.0%) | 2314 (100.0%) |
|                      | IUS location              |               |               |               |
|                      | missing                   | 3 ( 0.3%)     | 2 ( 0.2%)     | 5 ( 0.2%)     |
|                      | in situ                   | 1126 ( 99.2%) | 1161 ( 98.5%) | 2287 ( 98.8%) |
|                      | displaced, cervical canal | 2 ( 0.2%)     | 1 ( <0.1%)    | 3 ( 0.1%)     |
|                      | displaced, intrauterin    | 4 ( 0.4%)     | 14 ( 1.2%)    | 18 ( 0.8%)    |
|                      | expelled in vagina        | 0             | 0             | 0             |
|                      | myometrial perforation    | 0             | 0             | 0             |
|                      | absent                    | 0             | 0             | 0             |
|                      | other                     | 0             | 1 ( <0.1%)    | 1 ( <0.1%)    |
| Month 18             | Number of subjects        | 1042 (100.0%) | 1078 (100.0%) | 2120 (100.0%) |
|                      | IUS location              |               |               |               |
|                      | missing                   | 3 ( 0.3%)     | 4 ( 0.4%)     | 7 ( 0.3%)     |
|                      | in situ                   | 1031 ( 98.9%) | 1066 ( 98.9%) | 2097 ( 98.9%) |
|                      | displaced, cervical canal | 1 ( <0.1%)    | 1 ( <0.1%)    | 2 ( <0.1%)    |
|                      | displaced, intrauterin    | 6 ( 0.6%)     | 7 ( 0.6%)     | 13 ( 0.6%)    |
|                      | expelled in vagina        | 0             | 0             | 0             |
|                      | myometrial perforation    | 0             | 0             | 0             |
|                      | absent                    | 1 ( <0.1%)    | 0             | 1 ( <0.1%)    |
|                      | other                     | 0             | 0             | 0             |

**Table 14.1.2 / 25: IUS location by ultrasound by time point and treatment (FAS)**

| Time key first level  |                           | LCS12         | LCS16         | Total         |
|-----------------------|---------------------------|---------------|---------------|---------------|
| Month 24              | Number of subjects        | 933 (100.0%)  | 986 (100.0%)  | 1919 (100.0%) |
|                       | IUS location              |               |               |               |
|                       | missing                   | 4 ( 0.4%)     | 2 ( 0.2%)     | 6 ( 0.3%)     |
|                       | in situ                   | 925 ( 99.1%)  | 974 ( 98.8%)  | 1899 ( 99.0%) |
|                       | displaced, cervical canal | 1 ( 0.1%)     | 1 ( 0.1%)     | 2 ( 0.1%)     |
|                       | displaced, intrauterin    | 3 ( 0.3%)     | 7 ( 0.7%)     | 10 ( 0.5%)    |
|                       | expelled in vagina        | 0             | 0             | 0             |
|                       | myometrial perforation    | 0             | 1 ( 0.1%)     | 1 ( <0.1%)    |
|                       | absent                    | 0             | 0             | 0             |
|                       | other                     | 0             | 1 ( 0.1%)     | 1 ( <0.1%)    |
| Month 30              | Number of subjects        | 851 (100.0%)  | 901 (100.0%)  | 1752 (100.0%) |
|                       | IUS location              |               |               |               |
|                       | missing                   | 0             | 0             | 0             |
|                       | in situ                   | 846 ( 99.4%)  | 894 ( 99.2%)  | 1740 ( 99.3%) |
|                       | displaced, cervical canal | 1 ( 0.1%)     | 0             | 1 ( <0.1%)    |
|                       | displaced, intrauterin    | 3 ( 0.4%)     | 7 ( 0.8%)     | 10 ( 0.6%)    |
|                       | expelled in vagina        | 0             | 0             | 0             |
|                       | myometrial perforation    | 0             | 0             | 0             |
|                       | absent                    | 1 ( 0.1%)     | 0             | 1 ( <0.1%)    |
|                       | other                     | 0             | 0             | 0             |
| End of study-Month 36 | Number of subjects        | 1357 (100.0%) | 1379 (100.0%) | 2736 (100.0%) |
|                       | IUS location              |               |               |               |
|                       | missing                   | 33 ( 2.4%)    | 37 ( 2.7%)    | 70 ( 2.6%)    |
|                       | in situ                   | 1243 ( 91.6%) | 1261 ( 91.4%) | 2504 ( 91.5%) |
|                       | displaced, cervical canal | 19 ( 1.4%)    | 23 ( 1.7%)    | 42 ( 1.5%)    |
|                       | displaced, intrauterin    | 12 ( 0.9%)    | 17 ( 1.2%)    | 29 ( 1.1%)    |
|                       | expelled in vagina        | 1 ( <0.1%)    | 4 ( 0.3%)     | 5 ( 0.2%)     |
|                       | myometrial perforation    | 0             | 1 ( <0.1%)    | 1 ( <0.1%)    |
|                       | absent                    | 24 ( 1.8%)    | 15 ( 1.1%)    | 39 ( 1.4%)    |
|                       | other                     | 25 ( 1.8%)    | 21 ( 1.5%)    | 46 ( 1.7%)    |

Global Biostatistics: /by-sasp/patdb/projects/de04209/310442/stat/prod\_interim03/pgms/t-admin-compl.sas epkll 07OCT2011 10:51

End of table

**Table 14.1.2 / 26: IUS location by ultrasound by time point, parity status and treatment (FAS)**

| Time key first level | Parity   |                           | LCS12              | LCS16        | Total         |               |
|----------------------|----------|---------------------------|--------------------|--------------|---------------|---------------|
| Baseline             | 0 births | Number of subjects        | 553 (100.0%)       | 571 (100.0%) | 1124 (100.0%) |               |
|                      |          | IUS location              |                    |              |               |               |
|                      |          | missing                   | 2 ( 0.4%)          | 1 ( 0.2%)    | 3 ( 0.3%)     |               |
|                      |          | in situ                   | 545 ( 98.6%)       | 566 ( 99.1%) | 1111 ( 98.8%) |               |
|                      |          | displaced, cervical canal | 0                  | 0            | 0             |               |
|                      |          | displaced, intrauterin    | 4 ( 0.7%)          | 3 ( 0.5%)    | 7 ( 0.6%)     |               |
|                      |          | expelled in vagina        | 0                  | 1 ( 0.2%)    | 1 ( <0.1%)    |               |
|                      |          | myometrial perforation    | 0                  | 0            | 0             |               |
|                      |          | absent                    | 1 ( 0.2%)          | 0            | 1 ( <0.1%)    |               |
|                      |          | other                     | 1 ( 0.2%)          | 0            | 1 ( <0.1%)    |               |
|                      |          | 1 birth or more           | Number of subjects | 876 (100.0%) | 877 (100.0%)  | 1753 (100.0%) |
|                      |          |                           | IUS location       |              |               |               |
|                      |          |                           | missing            | 1 ( 0.1%)    | 0             | 1 ( <0.1%)    |
|                      |          |                           | in situ            | 870 ( 99.3%) | 871 ( 99.3%)  | 1741 ( 99.3%) |
|                      |          | displaced, cervical canal | 0                  | 4 ( 0.5%)    | 4 ( 0.2%)     |               |
|                      |          | displaced, intrauterin    | 5 ( 0.6%)          | 2 ( 0.2%)    | 7 ( 0.4%)     |               |
|                      |          | expelled in vagina        | 0                  | 0            | 0             |               |
|                      |          | myometrial perforation    | 0                  | 0            | 0             |               |
|                      |          | absent                    | 0                  | 0            | 0             |               |
|                      |          | other                     | 0                  | 0            | 0             |               |
| Month 3              | 0 births | Number of subjects        | 514 (100.0%)       | 525 (100.0%) | 1039 (100.0%) |               |
|                      |          | IUS location              |                    |              |               |               |
|                      |          | missing                   | 2 ( 0.4%)          | 1 ( 0.2%)    | 3 ( 0.3%)     |               |
|                      |          | in situ                   | 509 ( 99.0%)       | 519 ( 98.9%) | 1028 ( 98.9%) |               |
|                      |          | displaced, cervical canal | 0                  | 1 ( 0.2%)    | 1 ( <0.1%)    |               |
|                      |          | displaced, intrauterin    | 3 ( 0.6%)          | 3 ( 0.6%)    | 6 ( 0.6%)     |               |
|                      |          | expelled in vagina        | 0                  | 0            | 0             |               |
|                      |          | myometrial perforation    | 0                  | 0            | 0             |               |
|                      |          | absent                    | 0                  | 0            | 0             |               |
|                      |          | other                     | 0                  | 1 ( 0.2%)    | 1 ( <0.1%)    |               |

**Table 14.1.2 / 26: IUS location by ultrasound by time point, parity status and treatment (FAS)**

| Time key first level | Parity          |                           | LCS12        | LCS16        | Total         |
|----------------------|-----------------|---------------------------|--------------|--------------|---------------|
|                      | 1 birth or more | Number of subjects        | 827 (100.0%) | 830 (100.0%) | 1657 (100.0%) |
|                      |                 | IUS location              |              |              |               |
|                      |                 | missing                   | 3 ( 0.4%)    | 1 ( 0.1%)    | 4 ( 0.2%)     |
|                      |                 | in situ                   | 815 ( 98.5%) | 817 ( 98.4%) | 1632 ( 98.5%) |
|                      |                 | displaced, cervical canal | 2 ( 0.2%)    | 5 ( 0.6%)    | 7 ( 0.4%)     |
|                      |                 | displaced, intrauterin    | 5 ( 0.6%)    | 6 ( 0.7%)    | 11 ( 0.7%)    |
|                      |                 | expelled in vagina        | 0            | 0            | 0             |
|                      |                 | myometrial perforation    | 0            | 0            | 0             |
|                      |                 | absent                    | 2 ( 0.2%)    | 1 ( 0.1%)    | 3 ( 0.2%)     |
|                      |                 | other                     | 0            | 0            | 0             |
| Month 6              | 0 births        | Number of subjects        | 469 (100.0%) | 498 (100.0%) | 967 (100.0%)  |
|                      |                 | IUS location              |              |              |               |
|                      |                 | missing                   | 1 ( 0.2%)    | 2 ( 0.4%)    | 3 ( 0.3%)     |
|                      |                 | in situ                   | 462 ( 98.5%) | 490 ( 98.4%) | 952 ( 98.4%)  |
|                      |                 | displaced, cervical canal | 1 ( 0.2%)    | 1 ( 0.2%)    | 2 ( 0.2%)     |
|                      |                 | displaced, intrauterin    | 5 ( 1.1%)    | 4 ( 0.8%)    | 9 ( 0.9%)     |
|                      |                 | expelled in vagina        | 0            | 0            | 0             |
|                      |                 | myometrial perforation    | 0            | 0            | 0             |
|                      |                 | absent                    | 0            | 1 ( 0.2%)    | 1 ( 0.1%)     |
|                      |                 | other                     | 0            | 0            | 0             |
|                      | 1 birth or more | Number of subjects        | 770 (100.0%) | 786 (100.0%) | 1556 (100.0%) |
|                      |                 | IUS location              |              |              |               |
|                      |                 | missing                   | 3 ( 0.4%)    | 4 ( 0.5%)    | 7 ( 0.4%)     |
|                      |                 | in situ                   | 763 ( 99.1%) | 769 ( 97.8%) | 1532 ( 98.5%) |
|                      |                 | displaced, cervical canal | 2 ( 0.3%)    | 6 ( 0.8%)    | 8 ( 0.5%)     |
|                      |                 | displaced, intrauterin    | 2 ( 0.3%)    | 7 ( 0.9%)    | 9 ( 0.6%)     |
|                      |                 | expelled in vagina        | 0            | 0            | 0             |
|                      |                 | myometrial perforation    | 0            | 0            | 0             |
|                      |                 | absent                    | 0            | 0            | 0             |
|                      |                 | other                     | 0            | 0            | 0             |

**Table 14.1.2 / 26: IUS location by ultrasound by time point, parity status and treatment (FAS)**

| Time key first level | Parity   |                           | LCS12              | LCS16        | Total        |               |
|----------------------|----------|---------------------------|--------------------|--------------|--------------|---------------|
| Month 9              | 0 births | Number of subjects        | 442 (100.0%)       | 466 (100.0%) | 908 (100.0%) |               |
|                      |          | IUS location              |                    |              |              |               |
|                      |          | missing                   | 2 ( 0.5%)          | 1 ( 0.2%)    | 3 ( 0.3%)    |               |
|                      |          | in situ                   | 433 ( 98.0%)       | 458 ( 98.3%) | 891 ( 98.1%) |               |
|                      |          | displaced, cervical canal | 4 ( 0.9%)          | 1 ( 0.2%)    | 5 ( 0.6%)    |               |
|                      |          | displaced, intrauterin    | 3 ( 0.7%)          | 6 ( 1.3%)    | 9 ( 1.0%)    |               |
|                      |          | expelled in vagina        | 0                  | 0            | 0            |               |
|                      |          | myometrial perforation    | 0                  | 0            | 0            |               |
|                      |          | absent                    | 0                  | 0            | 0            |               |
|                      |          | other                     | 0                  | 0            | 0            |               |
|                      |          | 1 birth or more           | Number of subjects | 734 (100.0%) | 753 (100.0%) | 1487 (100.0%) |
|                      |          |                           | IUS location       |              |              |               |
|                      |          |                           | missing            | 1 ( 0.1%)    | 4 ( 0.5%)    | 5 ( 0.3%)     |
|                      |          |                           | in situ            | 725 ( 98.8%) | 738 ( 98.0%) | 1463 ( 98.4%) |
|                      |          | displaced, cervical canal | 2 ( 0.3%)          | 2 ( 0.3%)    | 4 ( 0.3%)    |               |
|                      |          | displaced, intrauterin    | 5 ( 0.7%)          | 9 ( 1.2%)    | 14 ( 0.9%)   |               |
|                      |          | expelled in vagina        | 0                  | 0            | 0            |               |
|                      |          | myometrial perforation    | 0                  | 0            | 0            |               |
|                      |          | absent                    | 0                  | 0            | 0            |               |
|                      |          | other                     | 1 ( 0.1%)          | 0            | 1 ( <0.1%)   |               |
| Month 12             | 0 births | Number of subjects        | 422 (100.0%)       | 452 (100.0%) | 874 (100.0%) |               |
|                      |          | IUS location              |                    |              |              |               |
|                      |          | missing                   | 1 ( 0.2%)          | 0            | 1 ( 0.1%)    |               |
|                      |          | in situ                   | 419 ( 99.3%)       | 446 ( 98.7%) | 865 ( 99.0%) |               |
|                      |          | displaced, cervical canal | 1 ( 0.2%)          | 1 ( 0.2%)    | 2 ( 0.2%)    |               |
|                      |          | displaced, intrauterin    | 1 ( 0.2%)          | 4 ( 0.9%)    | 5 ( 0.6%)    |               |
|                      |          | expelled in vagina        | 0                  | 0            | 0            |               |
|                      |          | myometrial perforation    | 0                  | 0            | 0            |               |
|                      |          | absent                    | 0                  | 0            | 0            |               |
|                      |          | other                     | 0                  | 1 ( 0.2%)    | 1 ( 0.1%)    |               |



**Table 14.1.2 / 26: IUS location by ultrasound by time point, parity status and treatment (FAS)**

| Time key first level | Parity          |                           | LCS12        | LCS16        | Total         |
|----------------------|-----------------|---------------------------|--------------|--------------|---------------|
|                      | 1 birth or more | Number of subjects        | 713 (100.0%) | 727 (100.0%) | 1440 (100.0%) |
|                      |                 | IUS location              |              |              |               |
|                      |                 | missing                   | 2 ( 0.3%)    | 2 ( 0.3%)    | 4 ( 0.3%)     |
|                      |                 | in situ                   | 707 ( 99.2%) | 715 ( 98.3%) | 1422 ( 98.8%) |
|                      |                 | displaced, cervical canal | 1 ( 0.1%)    | 0            | 1 ( <0.1%)    |
|                      |                 | displaced, intrauterin    | 3 ( 0.4%)    | 10 ( 1.4%)   | 13 ( 0.9%)    |
|                      |                 | expelled in vagina        | 0            | 0            | 0             |
|                      |                 | myometrial perforation    | 0            | 0            | 0             |
|                      |                 | absent                    | 0            | 0            | 0             |
|                      |                 | other                     | 0            | 0            | 0             |
| Month 18             | 0 births        | Number of subjects        | 387 (100.0%) | 407 (100.0%) | 794 (100.0%)  |
|                      |                 | IUS location              |              |              |               |
|                      |                 | missing                   | 2 ( 0.5%)    | 0            | 2 ( 0.3%)     |
|                      |                 | in situ                   | 380 ( 98.2%) | 403 ( 99.0%) | 783 ( 98.6%)  |
|                      |                 | displaced, cervical canal | 1 ( 0.3%)    | 1 ( 0.2%)    | 2 ( 0.3%)     |
|                      |                 | displaced, intrauterin    | 3 ( 0.8%)    | 3 ( 0.7%)    | 6 ( 0.8%)     |
|                      |                 | expelled in vagina        | 0            | 0            | 0             |
|                      |                 | myometrial perforation    | 0            | 0            | 0             |
|                      |                 | absent                    | 1 ( 0.3%)    | 0            | 1 ( 0.1%)     |
|                      |                 | other                     | 0            | 0            | 0             |
|                      | 1 birth or more | Number of subjects        | 655 (100.0%) | 671 (100.0%) | 1326 (100.0%) |
|                      |                 | IUS location              |              |              |               |
|                      |                 | missing                   | 1 ( 0.2%)    | 4 ( 0.6%)    | 5 ( 0.4%)     |
|                      |                 | in situ                   | 651 ( 99.4%) | 663 ( 98.8%) | 1314 ( 99.1%) |
|                      |                 | displaced, cervical canal | 0            | 0            | 0             |
|                      |                 | displaced, intrauterin    | 3 ( 0.5%)    | 4 ( 0.6%)    | 7 ( 0.5%)     |
|                      |                 | expelled in vagina        | 0            | 0            | 0             |
|                      |                 | myometrial perforation    | 0            | 0            | 0             |
|                      |                 | absent                    | 0            | 0            | 0             |
|                      |                 | other                     | 0            | 0            | 0             |

**Table 14.1.2 / 26: IUS location by ultrasound by time point, parity status and treatment (FAS)**

| Time key first level | Parity   |                           | LCS12              | LCS16        | Total        |               |
|----------------------|----------|---------------------------|--------------------|--------------|--------------|---------------|
| Month 24             | 0 births | Number of subjects        | 342 (100.0%)       | 373 (100.0%) | 715 (100.0%) |               |
|                      |          | IUS location              |                    |              |              |               |
|                      |          | missing                   | 1 ( 0.3%)          | 0            | 1 ( 0.1%)    |               |
|                      |          | in situ                   | 341 ( 99.7%)       | 369 ( 98.9%) | 710 ( 99.3%) |               |
|                      |          | displaced, cervical canal | 0                  | 0            | 0            |               |
|                      |          | displaced, intrauterin    | 0                  | 3 ( 0.8%)    | 3 ( 0.4%)    |               |
|                      |          | expelled in vagina        | 0                  | 0            | 0            |               |
|                      |          | myometrial perforation    | 0                  | 1 ( 0.3%)    | 1 ( 0.1%)    |               |
|                      |          | absent                    | 0                  | 0            | 0            |               |
|                      |          | other                     | 0                  | 0            | 0            |               |
|                      |          | 1 birth or more           | Number of subjects | 591 (100.0%) | 613 (100.0%) | 1204 (100.0%) |
|                      |          |                           | IUS location       |              |              |               |
|                      |          |                           | missing            | 3 ( 0.5%)    | 2 ( 0.3%)    | 5 ( 0.4%)     |
|                      |          |                           | in situ            | 584 ( 98.8%) | 605 ( 98.7%) | 1189 ( 98.8%) |
|                      |          | displaced, cervical canal | 1 ( 0.2%)          | 1 ( 0.2%)    | 2 ( 0.2%)    |               |
|                      |          | displaced, intrauterin    | 3 ( 0.5%)          | 4 ( 0.7%)    | 7 ( 0.6%)    |               |
|                      |          | expelled in vagina        | 0                  | 0            | 0            |               |
|                      |          | myometrial perforation    | 0                  | 0            | 0            |               |
|                      |          | absent                    | 0                  | 0            | 0            |               |
|                      |          | other                     | 0                  | 1 ( 0.2%)    | 1 ( <0.1%)   |               |
| Month 30             | 0 births | Number of subjects        | 318 (100.0%)       | 341 (100.0%) | 659 (100.0%) |               |
|                      |          | IUS location              |                    |              |              |               |
|                      |          | missing                   | 0                  | 0            | 0            |               |
|                      |          | in situ                   | 317 ( 99.7%)       | 339 ( 99.4%) | 656 ( 99.5%) |               |
|                      |          | displaced, cervical canal | 0                  | 0            | 0            |               |
|                      |          | displaced, intrauterin    | 0                  | 2 ( 0.6%)    | 2 ( 0.3%)    |               |
|                      |          | expelled in vagina        | 0                  | 0            | 0            |               |
|                      |          | myometrial perforation    | 0                  | 0            | 0            |               |
|                      |          | absent                    | 1 ( 0.3%)          | 0            | 1 ( 0.2%)    |               |
|                      |          | other                     | 0                  | 0            | 0            |               |

**Table 14.1.2 / 26: IUS location by ultrasound by time point, parity status and treatment (FAS)**

| Time key first level  | Parity          |                           | LCS12        | LCS16        | Total         |
|-----------------------|-----------------|---------------------------|--------------|--------------|---------------|
|                       | 1 birth or more | Number of subjects        | 533 (100.0%) | 560 (100.0%) | 1093 (100.0%) |
|                       |                 | IUS location              |              |              |               |
|                       |                 | missing                   | 0            | 0            | 0             |
|                       |                 | in situ                   | 529 ( 99.2%) | 555 ( 99.1%) | 1084 ( 99.2%) |
|                       |                 | displaced, cervical canal | 1 ( 0.2%)    | 0            | 1 ( <0.1%)    |
|                       |                 | displaced, intrauterin    | 3 ( 0.6%)    | 5 ( 0.9%)    | 8 ( 0.7%)     |
|                       |                 | expelled in vagina        | 0            | 0            | 0             |
|                       |                 | myometrial perforation    | 0            | 0            | 0             |
|                       |                 | absent                    | 0            | 0            | 0             |
|                       |                 | other                     | 0            | 0            | 0             |
| End of study-Month 36 | 0 births        | Number of subjects        | 536 (100.0%) | 545 (100.0%) | 1081 (100.0%) |
|                       |                 | IUS location              |              |              |               |
|                       |                 | missing                   | 11 ( 2.1%)   | 20 ( 3.7%)   | 31 ( 2.9%)    |
|                       |                 | in situ                   | 496 ( 92.5%) | 497 ( 91.2%) | 993 ( 91.9%)  |
|                       |                 | displaced, cervical canal | 9 ( 1.7%)    | 4 ( 0.7%)    | 13 ( 1.2%)    |
|                       |                 | displaced, intrauterin    | 4 ( 0.7%)    | 8 ( 1.5%)    | 12 ( 1.1%)    |
|                       |                 | expelled in vagina        | 0            | 1 ( 0.2%)    | 1 ( <0.1%)    |
|                       |                 | myometrial perforation    | 0            | 1 ( 0.2%)    | 1 ( <0.1%)    |
|                       |                 | absent                    | 4 ( 0.7%)    | 3 ( 0.6%)    | 7 ( 0.6%)     |
|                       |                 | other                     | 12 ( 2.2%)   | 11 ( 2.0%)   | 23 ( 2.1%)    |
|                       | 1 birth or more | Number of subjects        | 821 (100.0%) | 834 (100.0%) | 1655 (100.0%) |
|                       |                 | IUS location              |              |              |               |
|                       |                 | missing                   | 22 ( 2.7%)   | 17 ( 2.0%)   | 39 ( 2.4%)    |
|                       |                 | in situ                   | 747 ( 91.0%) | 764 ( 91.6%) | 1511 ( 91.3%) |
|                       |                 | displaced, cervical canal | 10 ( 1.2%)   | 19 ( 2.3%)   | 29 ( 1.8%)    |
|                       |                 | displaced, intrauterin    | 8 ( 1.0%)    | 9 ( 1.1%)    | 17 ( 1.0%)    |
|                       |                 | expelled in vagina        | 1 ( 0.1%)    | 3 ( 0.4%)    | 4 ( 0.2%)     |
|                       |                 | myometrial perforation    | 0            | 0            | 0             |
|                       |                 | absent                    | 20 ( 2.4%)   | 12 ( 1.4%)   | 32 ( 1.9%)    |
|                       |                 | other                     | 13 ( 1.6%)   | 10 ( 1.2%)   | 23 ( 1.4%)    |

Global Biostatistics: /by-sasp/patdb/projects/de04209/310442/stat/prod\_interim03/pgms/t-admin-compl.sas epkl 07OCT2011 10:51

End of table

**Table 14.1.2 / 27: IUS location by ultrasound (compliant vs. non-compliant) by time point and treatment (FAS)**

| Time key first level |                    | LCS12         | LCS16         | Total         |
|----------------------|--------------------|---------------|---------------|---------------|
| Baseline             | Number of subjects | 1429 (100.0%) | 1448 (100.0%) | 2877 (100.0%) |
|                      | Compliance         |               |               |               |
|                      | missing            | 3 ( 0.2%)     | 1 (<0.1%)     | 4 ( 0.1%)     |
|                      | compliant          | 1424 ( 99.7%) | 1442 ( 99.6%) | 2866 ( 99.6%) |
| Month 3              | Number of subjects | 1341 (100.0%) | 1355 (100.0%) | 2696 (100.0%) |
|                      | Compliance         |               |               |               |
|                      | missing            | 5 ( 0.4%)     | 2 ( 0.1%)     | 7 ( 0.3%)     |
|                      | compliant          | 1332 ( 99.3%) | 1345 ( 99.3%) | 2677 ( 99.3%) |
| Month 6              | Number of subjects | 1239 (100.0%) | 1284 (100.0%) | 2523 (100.0%) |
|                      | Compliance         |               |               |               |
|                      | missing            | 4 ( 0.3%)     | 6 ( 0.5%)     | 10 ( 0.4%)    |
|                      | compliant          | 1232 ( 99.4%) | 1270 ( 98.9%) | 2502 ( 99.2%) |
| Month 9              | Number of subjects | 1176 (100.0%) | 1219 (100.0%) | 2395 (100.0%) |
|                      | Compliance         |               |               |               |
|                      | missing            | 3 ( 0.3%)     | 5 ( 0.4%)     | 8 ( 0.3%)     |
|                      | compliant          | 1166 ( 99.1%) | 1211 ( 99.3%) | 2377 ( 99.2%) |
| Month 12             | Number of subjects | 1135 (100.0%) | 1179 (100.0%) | 2314 (100.0%) |
|                      | Compliance         |               |               |               |
|                      | missing            | 3 ( 0.3%)     | 2 ( 0.2%)     | 5 ( 0.2%)     |
|                      | compliant          | 1130 ( 99.6%) | 1175 ( 99.7%) | 2305 ( 99.6%) |
| Month 18             | Number of subjects | 1042 (100.0%) | 1078 (100.0%) | 2120 (100.0%) |
|                      | Compliance         |               |               |               |
|                      | missing            | 3 ( 0.3%)     | 4 ( 0.4%)     | 7 ( 0.3%)     |
|                      | compliant          | 1037 ( 99.5%) | 1073 ( 99.5%) | 2110 ( 99.5%) |
|                      | not compliant      | 2 ( 0.2%)     | 1 (<0.1%)     | 3 ( 0.1%)     |

**Table 14.1.2 / 27: IUS location by ultrasound (compliant vs. non-compliant) by time point and treatment (FAS)**

| Time key first level  |                    | LCS12         | LCS16         | Total         |
|-----------------------|--------------------|---------------|---------------|---------------|
| Month 24              | Number of subjects | 933 (100.0%)  | 986 (100.0%)  | 1919 (100.0%) |
|                       | Compliance         |               |               |               |
|                       | missing            | 4 ( 0.4%)     | 2 ( 0.2%)     | 6 ( 0.3%)     |
|                       | compliant          | 928 ( 99.5%)  | 981 ( 99.5%)  | 1909 ( 99.5%) |
| Month 30              | Number of subjects | 851 (100.0%)  | 901 (100.0%)  | 1752 (100.0%) |
|                       | Compliance         |               |               |               |
|                       | missing            | 0             | 0             | 0             |
|                       | compliant          | 849 ( 99.8%)  | 901 (100.0%)  | 1750 ( 99.9%) |
| End of study-Month 36 | Number of subjects | 1357 (100.0%) | 1379 (100.0%) | 2736 (100.0%) |
|                       | Compliance         |               |               |               |
|                       | missing            | 33 ( 2.4%)    | 37 ( 2.7%)    | 70 ( 2.6%)    |
|                       | compliant          | 1255 ( 92.5%) | 1278 ( 92.7%) | 2533 ( 92.6%) |
|                       | not compliant      | 69 ( 5.1%)    | 64 ( 4.6%)    | 133 ( 4.9%)   |

Note: Compliant: location of the IUS in situ or displaced intrauterine.

All other categories counted as not compliant.

Global Biostatistics: /by-sasp/patdb/projects/de04209/310442/stat/prod\_interim03/pgms/t-admin-compl.sas epkll 07OCT2011 10:51

End of table

**Table 14.1.2 / 28: IUS location by ultrasound (compliant vs. non-compliant) by time point, parity status and treatment (FAS)**

| Time key first level |                    | LCS12              | LCS16         | Total         |               |
|----------------------|--------------------|--------------------|---------------|---------------|---------------|
| Baseline             | Number of subjects | 1429 (100.0%)      | 1448 (100.0%) | 2877 (100.0%) |               |
|                      | Parity             |                    |               |               |               |
|                      | 0 births           | 553 ( 38.7%)       | 571 ( 39.4%)  | 1124 ( 39.1%) |               |
|                      | missing            | 2 ( 0.1%)          | 1 (<0.1%)     | 3 ( 0.1%)     |               |
|                      | compliant          | 549 ( 38.4%)       | 569 ( 39.3%)  | 1118 ( 38.9%) |               |
|                      | not compliant      | 2 ( 0.1%)          | 1 (<0.1%)     | 3 ( 0.1%)     |               |
|                      | 1 birth or more    | 876 ( 61.3%)       | 877 ( 60.6%)  | 1753 ( 60.9%) |               |
|                      | missing            | 1 (<0.1%)          | 0             | 1 (<0.1%)     |               |
|                      | compliant          | 875 ( 61.2%)       | 873 ( 60.3%)  | 1748 ( 60.8%) |               |
|                      | not compliant      | 0                  | 4 ( 0.3%)     | 4 ( 0.1%)     |               |
|                      | Month 3            | Number of subjects | 1341 (100.0%) | 1355 (100.0%) | 2696 (100.0%) |
|                      |                    | Parity             |               |               |               |
|                      |                    | 0 births           | 514 ( 38.3%)  | 525 ( 38.7%)  | 1039 ( 38.5%) |
|                      |                    | missing            | 2 ( 0.1%)     | 1 (<0.1%)     | 3 ( 0.1%)     |
| compliant            |                    | 512 ( 38.2%)       | 522 ( 38.5%)  | 1034 ( 38.4%) |               |
| not compliant        |                    | 0                  | 2 ( 0.1%)     | 2 (<0.1%)     |               |
| 1 birth or more      |                    | 827 ( 61.7%)       | 830 ( 61.3%)  | 1657 ( 61.5%) |               |
| missing              |                    | 3 ( 0.2%)          | 1 (<0.1%)     | 4 ( 0.1%)     |               |
| compliant            |                    | 820 ( 61.1%)       | 823 ( 60.7%)  | 1643 ( 60.9%) |               |
| not compliant        |                    | 4 ( 0.3%)          | 6 ( 0.4%)     | 10 ( 0.4%)    |               |
| Month 6              |                    | Number of subjects | 1239 (100.0%) | 1284 (100.0%) | 2523 (100.0%) |
|                      |                    | Parity             |               |               |               |
|                      |                    | 0 births           | 469 ( 37.9%)  | 498 ( 38.8%)  | 967 ( 38.3%)  |
|                      |                    | missing            | 1 (<0.1%)     | 2 ( 0.2%)     | 3 ( 0.1%)     |
|                      | compliant          | 467 ( 37.7%)       | 494 ( 38.5%)  | 961 ( 38.1%)  |               |
|                      | not compliant      | 1 (<0.1%)          | 2 ( 0.2%)     | 3 ( 0.1%)     |               |
|                      | 1 birth or more    | 770 ( 62.1%)       | 786 ( 61.2%)  | 1556 ( 61.7%) |               |
|                      | missing            | 3 ( 0.2%)          | 4 ( 0.3%)     | 7 ( 0.3%)     |               |
|                      | compliant          | 765 ( 61.7%)       | 776 ( 60.4%)  | 1541 ( 61.1%) |               |
|                      | not compliant      | 2 ( 0.2%)          | 6 ( 0.5%)     | 8 ( 0.3%)     |               |

**Table 14.1.2 / 28: IUS location by ultrasound (compliant vs. non-compliant) by time point, parity status and treatment (FAS)**

| Time key first level |                    | LCS12         | LCS16         | Total         |
|----------------------|--------------------|---------------|---------------|---------------|
| Month 9              | Number of subjects | 1176 (100.0%) | 1219 (100.0%) | 2395 (100.0%) |
|                      | Parity             |               |               |               |
|                      | 0 births           | 442 ( 37.6%)  | 466 ( 38.2%)  | 908 ( 37.9%)  |
|                      | missing            | 2 ( 0.2%)     | 1 (<0.1%)     | 3 ( 0.1%)     |
|                      | compliant          | 436 ( 37.1%)  | 464 ( 38.1%)  | 900 ( 37.6%)  |
|                      | not compliant      | 4 ( 0.3%)     | 1 (<0.1%)     | 5 ( 0.2%)     |
|                      | 1 birth or more    | 734 ( 62.4%)  | 753 ( 61.8%)  | 1487 ( 62.1%) |
|                      | missing            | 1 (<0.1%)     | 4 ( 0.3%)     | 5 ( 0.2%)     |
|                      | compliant          | 730 ( 62.1%)  | 747 ( 61.3%)  | 1477 ( 61.7%) |
|                      | not compliant      | 3 ( 0.3%)     | 2 ( 0.2%)     | 5 ( 0.2%)     |
| Month 12             | Number of subjects | 1135 (100.0%) | 1179 (100.0%) | 2314 (100.0%) |
|                      | Parity             |               |               |               |
|                      | 0 births           | 422 ( 37.2%)  | 452 ( 38.3%)  | 874 ( 37.8%)  |
|                      | missing            | 1 (<0.1%)     | 0             | 1 (<0.1%)     |
|                      | compliant          | 420 ( 37.0%)  | 450 ( 38.2%)  | 870 ( 37.6%)  |
|                      | not compliant      | 1 (<0.1%)     | 2 ( 0.2%)     | 3 ( 0.1%)     |
|                      | 1 birth or more    | 713 ( 62.8%)  | 727 ( 61.7%)  | 1440 ( 62.2%) |
|                      | missing            | 2 ( 0.2%)     | 2 ( 0.2%)     | 4 ( 0.2%)     |
|                      | compliant          | 710 ( 62.6%)  | 725 ( 61.5%)  | 1435 ( 62.0%) |
|                      | not compliant      | 1 (<0.1%)     | 0             | 1 (<0.1%)     |
| Month 18             | Number of subjects | 1042 (100.0%) | 1078 (100.0%) | 2120 (100.0%) |
|                      | Parity             |               |               |               |
|                      | 0 births           | 387 ( 37.1%)  | 407 ( 37.8%)  | 794 ( 37.5%)  |
|                      | missing            | 2 ( 0.2%)     | 0             | 2 (<0.1%)     |
|                      | compliant          | 383 ( 36.8%)  | 406 ( 37.7%)  | 789 ( 37.2%)  |
|                      | not compliant      | 2 ( 0.2%)     | 1 (<0.1%)     | 3 ( 0.1%)     |
|                      | 1 birth or more    | 655 ( 62.9%)  | 671 ( 62.2%)  | 1326 ( 62.5%) |
|                      | missing            | 1 (<0.1%)     | 4 ( 0.4%)     | 5 ( 0.2%)     |
|                      | compliant          | 654 ( 62.8%)  | 667 ( 61.9%)  | 1321 ( 62.3%) |
|                      | not compliant      | 0             | 0             | 0             |

**Table 14.1.2 / 28: IUS location by ultrasound (compliant vs. non-compliant) by time point, parity status and treatment (FAS)**

| Time key first level  |                    | LCS12         | LCS16         | Total         |
|-----------------------|--------------------|---------------|---------------|---------------|
| Month 24              | Number of subjects | 933 (100.0%)  | 986 (100.0%)  | 1919 (100.0%) |
|                       | Parity             |               |               |               |
|                       | 0 births           | 342 ( 36.7%)  | 373 ( 37.8%)  | 715 ( 37.3%)  |
|                       | missing            | 1 ( 0.1%)     | 0             | 1 ( <0.1%)    |
|                       | compliant          | 341 ( 36.5%)  | 372 ( 37.7%)  | 713 ( 37.2%)  |
|                       | not compliant      | 0             | 1 ( 0.1%)     | 1 ( <0.1%)    |
|                       | 1 birth or more    | 591 ( 63.3%)  | 613 ( 62.2%)  | 1204 ( 62.7%) |
|                       | missing            | 3 ( 0.3%)     | 2 ( 0.2%)     | 5 ( 0.3%)     |
|                       | compliant          | 587 ( 62.9%)  | 609 ( 61.8%)  | 1196 ( 62.3%) |
|                       | not compliant      | 1 ( 0.1%)     | 2 ( 0.2%)     | 3 ( 0.2%)     |
| Month 30              | Number of subjects | 851 (100.0%)  | 901 (100.0%)  | 1752 (100.0%) |
|                       | Parity             |               |               |               |
|                       | 0 births           | 318 ( 37.4%)  | 341 ( 37.8%)  | 659 ( 37.6%)  |
|                       | missing            | 0             | 0             | 0             |
|                       | compliant          | 317 ( 37.3%)  | 341 ( 37.8%)  | 658 ( 37.6%)  |
|                       | not compliant      | 1 ( 0.1%)     | 0             | 1 ( <0.1%)    |
|                       | 1 birth or more    | 533 ( 62.6%)  | 560 ( 62.2%)  | 1093 ( 62.4%) |
|                       | missing            | 0             | 0             | 0             |
|                       | compliant          | 532 ( 62.5%)  | 560 ( 62.2%)  | 1092 ( 62.3%) |
|                       | not compliant      | 1 ( 0.1%)     | 0             | 1 ( <0.1%)    |
| End of study-Month 36 | Number of subjects | 1357 (100.0%) | 1379 (100.0%) | 2736 (100.0%) |
|                       | Parity             |               |               |               |
|                       | 0 births           | 536 ( 39.5%)  | 545 ( 39.5%)  | 1081 ( 39.5%) |
|                       | missing            | 11 ( 0.8%)    | 20 ( 1.5%)    | 31 ( 1.1%)    |
|                       | compliant          | 500 ( 36.8%)  | 505 ( 36.6%)  | 1005 ( 36.7%) |
|                       | not compliant      | 25 ( 1.8%)    | 20 ( 1.5%)    | 45 ( 1.6%)    |
|                       | 1 birth or more    | 821 ( 60.5%)  | 834 ( 60.5%)  | 1655 ( 60.5%) |
|                       | missing            | 22 ( 1.6%)    | 17 ( 1.2%)    | 39 ( 1.4%)    |
|                       | compliant          | 755 ( 55.6%)  | 773 ( 56.1%)  | 1528 ( 55.8%) |
|                       | not compliant      | 44 ( 3.2%)    | 44 ( 3.2%)    | 88 ( 3.2%)    |

Note: Compliant: location of the IUS in situ or displaced intrauterine.

All other categories counted as not compliant.

Global Biostatistics: /by-sasp/patdb/projects/de04209/310442/stat/prod\_interim03/pgms/t-admin-compl.sas epkll 07OCT2011 10:51

End of table



**Table 14.1.2 / 29: Investigators evaluation of IUS removal procedure by treatment (FAS)**

|                                 | LCS12         | LCS16        | Total         |
|---------------------------------|---------------|--------------|---------------|
| Number of subjects              | 1333 (100.0%) | 660 (100.0%) | 1993 (100.0%) |
| IUS removal, general assessment |               |              |               |
| missing                         | 16 ( 1.2%)    | 27 ( 4.1%)   | 43 ( 2.2%)    |
| easy                            | 1211 ( 90.8%) | 588 ( 89.1%) | 1799 ( 90.3%) |
| slightly difficult              | 82 ( 6.2%)    | 33 ( 5.0%)   | 115 ( 5.8%)   |
| very difficult                  | 24 ( 1.8%)    | 12 ( 1.8%)   | 36 ( 1.8%)    |

Note: Only subjects with documented removal of IUS

Global Biostatistics: /by-sasp/patdb/projects/de04209/310442/stat/prod\_interim03/pgms/t-admin-compl.sas epkl 07OCT2011 10:51

End of table

**Table 14.1.2 / 30: Investigators evaluation of IUS removal procedure by parity (0 births vs. 1 or more) and treatment (FAS)**

|                     | LCS12         | LCS16        | Total         |
|---------------------|---------------|--------------|---------------|
| Number of subjects  | 1333 (100.0%) | 660 (100.0%) | 1993 (100.0%) |
| Parity              |               |              |               |
| 0 births            | 534 ( 40.1%)  | 283 ( 42.9%) | 817 ( 41.0%)  |
| - of these: missing | 3 ( 0.6%)     | 10 ( 3.5%)   | 13 ( 1.6%)    |
| easy                | 495 ( 92.7%)  | 251 ( 88.7%) | 746 ( 91.3%)  |
| slightly difficult  | 29 ( 5.4%)    | 18 ( 6.4%)   | 47 ( 5.8%)    |
| very difficult      | 7 ( 1.3%)     | 4 ( 1.4%)    | 11 ( 1.3%)    |
| 1 birth or more     | 799 ( 59.9%)  | 377 ( 57.1%) | 1176 ( 59.0%) |
| - of these: missing | 13 ( 1.6%)    | 17 ( 4.5%)   | 30 ( 2.6%)    |
| easy                | 716 ( 89.6%)  | 337 ( 89.4%) | 1053 ( 89.5%) |
| slightly difficult  | 53 ( 6.6%)    | 15 ( 4.0%)   | 68 ( 5.8%)    |
| very difficult      | 17 ( 2.1%)    | 8 ( 2.1%)    | 25 ( 2.1%)    |

Note: Only subjects with documented removal of IUS

Global Biostatistics: /by-sasp/patdb/projects/de04209/310442/stat/prod\_interim03/pgms/t-admin-compl.sas epkl 07OCT2011 10:51

End of table

**Table 14.1.2 / 31: Subjects evaluation of pain during IUS removal procedure by treatment (FAS)**

|                    | LCS12         | LCS16        | Total         |
|--------------------|---------------|--------------|---------------|
| Number of subjects | 1333 (100.0%) | 660 (100.0%) | 1993 (100.0%) |
| IUS removal, pain  |               |              |               |
| missing            | 10 ( 0.8%)    | 21 ( 3.2%)   | 31 ( 1.6%)    |
| none               | 460 ( 34.5%)  | 260 ( 39.4%) | 720 ( 36.1%)  |
| mild               | 634 ( 47.6%)  | 281 ( 42.6%) | 915 ( 45.9%)  |
| moderate           | 185 ( 13.9%)  | 82 ( 12.4%)  | 267 ( 13.4%)  |
| severe             | 44 ( 3.3%)    | 16 ( 2.4%)   | 60 ( 3.0%)    |

Note: Only subjects with documented removal of IUS

Global Biostatistics: /by-sasp/patdb/projects/de04209/310442/stat/prod\_interim03/pgms/t-admin-compl.sas epkll 07OCT2011 10:51

End of table

**Table 14.1.2 / 32: Subjects evaluation of pain during IUS removal procedure by parity (0 births vs. 1 or more) and treatment (FAS)**

|                     | LCS12         | LCS16        | Total         |
|---------------------|---------------|--------------|---------------|
| Number of subjects  | 1333 (100.0%) | 660 (100.0%) | 1993 (100.0%) |
| Parity              |               |              |               |
| 0 births            | 534 ( 40.1%)  | 283 ( 42.9%) | 817 ( 41.0%)  |
| - of these: missing | 2 ( 0.4%)     | 9 ( 3.2%)    | 11 ( 1.3%)    |
| none                | 95 ( 17.8%)   | 65 ( 23.0%)  | 160 ( 19.6%)  |
| mild                | 294 ( 55.1%)  | 148 ( 52.3%) | 442 ( 54.1%)  |
| moderate            | 116 ( 21.7%)  | 51 ( 18.0%)  | 167 ( 20.4%)  |
| severe              | 27 ( 5.1%)    | 10 ( 3.5%)   | 37 ( 4.5%)    |
| 1 birth or more     | 799 ( 59.9%)  | 377 ( 57.1%) | 1176 ( 59.0%) |
| - of these: missing | 8 ( 1.0%)     | 12 ( 3.2%)   | 20 ( 1.7%)    |
| none                | 365 ( 45.7%)  | 195 ( 51.7%) | 560 ( 47.6%)  |
| mild                | 340 ( 42.6%)  | 133 ( 35.3%) | 473 ( 40.2%)  |
| moderate            | 69 ( 8.6%)    | 31 ( 8.2%)   | 100 ( 8.5%)   |
| severe              | 17 ( 2.1%)    | 6 ( 1.6%)    | 23 ( 2.0%)    |

Note: Only subjects with documented removal of IUS

Global Biostatistics: /by-sasp/patdb/projects/de04209/310442/stat/prod\_interim03/pgms/t-admin-compl.sas epkll 07OCT2011 10:51

End of table

**Table 14.1.2 / 33: Number of subjects with expulsions (FAS)**

|                            | LCS12 (N=1432) | LCS16 (N=1452) | Total (N=2884) |
|----------------------------|----------------|----------------|----------------|
| Number of Subjects         | 1426 (100.0%)  | 1445 (100.0%)  | 2871 (100.0%)  |
| IUS partially expelled     |                |                |                |
| no                         | 1402 ( 98.3%)  | 1415 ( 97.9%)  | 2817 ( 98.1%)  |
| yes                        | 24 ( 1.7%)     | 30 ( 2.1%)     | 54 ( 1.9%)     |
| IUS totally expelled       |                |                |                |
| no                         | 1397 ( 98.0%)  | 1429 ( 98.9%)  | 2826 ( 98.4%)  |
| yes                        | 29 ( 2.0%)     | 16 ( 1.1%)     | 45 ( 1.6%)     |
| Partial or total expulsion |                |                |                |
| no                         | 1373 ( 96.3%)  | 1399 ( 96.8%)  | 2772 ( 96.6%)  |
| yes                        | 53 ( 3.7%)     | 46 ( 3.2%)     | 99 ( 3.4%)     |

Note: Only subjects with a successful insertion are considered

Global Biostatistics: /by-sasp/patdb/projects/de04209/310442/stat/prod\_interim03/pgms/t-expul.sas epkl 07OCT2011 10:52

End of table

**Table 14.1.2 / 34: Number of subjects with expulsions by parity (FAS)**

| Parity                     |                        | LCS12 (N=1432) | LCS16 (N=1452) | Total (N=2884) |
|----------------------------|------------------------|----------------|----------------|----------------|
| 0 births                   | Number of Subjects     | 551 (100.0%)   | 570 (100.0%)   | 1121 (100.0%)  |
|                            | IUS partially expelled |                |                |                |
|                            | no                     | 540 ( 98.0%)   | 563 ( 98.8%)   | 1103 ( 98.4%)  |
|                            | yes                    | 11 ( 2.0%)     | 7 ( 1.2%)      | 18 ( 1.6%)     |
|                            | IUS totally expelled   |                |                |                |
|                            | no                     | 546 ( 99.1%)   | 568 ( 99.6%)   | 1114 ( 99.4%)  |
|                            | yes                    | 5 ( 0.9%)      | 2 ( 0.4%)      | 7 ( 0.6%)      |
| Partial or total expulsion | no                     | 535 ( 97.1%)   | 561 ( 98.4%)   | 1096 ( 97.8%)  |
|                            | yes                    | 16 ( 2.9%)     | 9 ( 1.6%)      | 25 ( 2.2%)     |
| 1 birth or more            | Number of Subjects     | 875 (100.0%)   | 875 (100.0%)   | 1750 (100.0%)  |
|                            | IUS partially expelled |                |                |                |
|                            | no                     | 862 ( 98.5%)   | 852 ( 97.4%)   | 1714 ( 97.9%)  |
|                            | yes                    | 13 ( 1.5%)     | 23 ( 2.6%)     | 36 ( 2.1%)     |
|                            | IUS totally expelled   |                |                |                |
|                            | no                     | 851 ( 97.3%)   | 861 ( 98.4%)   | 1712 ( 97.8%)  |
|                            | yes                    | 24 ( 2.7%)     | 14 ( 1.6%)     | 38 ( 2.2%)     |
| Partial or total expulsion | no                     | 838 ( 95.8%)   | 838 ( 95.8%)   | 1676 ( 95.8%)  |
|                            | yes                    | 37 ( 4.2%)     | 37 ( 4.2%)     | 74 ( 4.2%)     |

Note: Only subjects with a successful insertion are considered

Global Biostatistics: /by-sasp/patdb/projects/de04209/310442/stat/prod\_interim03/pgms/t-expul.sas epkll 07OCT2011 10:52

End of table

**Table 14.1.2 / 35: Listing of subjects with expulsions (FAS)**

| TREATMENT | Subject number | Parity          | Age category   | IUS partially expelled | IUS totally expelled | Time to at least partial expulsion [days] | Time to total expulsion [days] |
|-----------|----------------|-----------------|----------------|------------------------|----------------------|-------------------------------------------|--------------------------------|
| LCS12     | 120240         | 1 birth or more | 25 < age <= 35 | no                     | yes                  | 574                                       | 574                            |
|           | 120242         | 0 births        | age <= 25      | no                     | yes                  | 372                                       | 372                            |
|           | 120329         | 1 birth or more | age <= 25      | no                     | yes                  | 871                                       | 871                            |
|           | 120623         | 1 birth or more | age <= 25      | no                     | yes                  | 1029                                      | 1029                           |
|           | 140605         | 1 birth or more | age <= 25      | yes                    | no                   | 913                                       | 931                            |
|           | 140905         | 0 births        | 25 < age <= 35 | yes                    | no                   | 275                                       | 524                            |
|           | 141008         | 1 birth or more | 25 < age <= 35 | yes                    | no                   | 63                                        | 63                             |
|           | 141416         | 1 birth or more | age <= 25      | no                     | yes                  | 270                                       | 270                            |
|           | 141426         | 0 births        | age <= 25      | no                     | yes                  | 915                                       | 915                            |
|           | 150155         | 0 births        | 25 < age <= 35 | yes                    | no                   | 274                                       | 279                            |
|           | 160220         | 1 birth or more | 25 < age <= 35 | no                     | yes                  | 712                                       | 712                            |
|           | 160309         | 0 births        | age <= 25      | yes                    | no                   | 210                                       | 504                            |
|           | 161431         | 0 births        | age <= 25      | yes                    | no                   | 572                                       | 580                            |
|           | 161540         | 0 births        | age <= 25      | yes                    | no                   | 294                                       | 294                            |
|           | 180302         | 1 birth or more | 25 < age <= 35 | yes                    | no                   | 423                                       | 423                            |
|           | 180315         | 1 birth or more | 25 < age <= 35 | yes                    | no                   | 193                                       | 193                            |
|           | 180636         | 1 birth or more | 25 < age <= 35 | no                     | yes                  | 1                                         | 1                              |
|           | 190104         | 0 births        | age <= 25      | yes                    | no                   | 1103                                      | 1103                           |
|           | 190218         | 1 birth or more | age <= 25      | yes                    | no                   | 185                                       | 189                            |
|           | 190635         | 1 birth or more | age <= 25      | no                     | yes                  | 1083                                      | 1083                           |
|           | 200604         | 1 birth or more | age <= 25      | no                     | yes                  | 35                                        | 35                             |
|           | 200705         | 0 births        | 25 < age <= 35 | yes                    | no                   | 728                                       | 728                            |
|           | 210519         | 1 birth or more | 25 < age <= 35 | yes                    | no                   | 643                                       | 643                            |
|           | 230312         | 1 birth or more | 25 < age <= 35 | no                     | yes                  | 25                                        | 25                             |
|           | 230816         | 1 birth or more | 25 < age <= 35 | no                     | yes                  | 981                                       | 981                            |
|           | 240351         | 1 birth or more | 25 < age <= 35 | no                     | yes                  | 92                                        | 92                             |
|           | 240364         | 1 birth or more | age <= 25      | no                     | yes                  | 183                                       | 183                            |
|           | 240625         | 1 birth or more | age <= 25      | yes                    | no                   | 182                                       | 212                            |
|           | 240634         | 1 birth or more | 25 < age <= 35 | no                     | yes                  | 1072                                      | 1072                           |
|           | 240638         | 1 birth or more | age <= 25      | yes                    | no                   | 33                                        | 34                             |
|           | 240808         | 0 births        | 25 < age <= 35 | yes                    | no                   | 365                                       | 365                            |
|           | 241187         | 1 birth or more | age <= 25      | yes                    | no                   | 176                                       | 176                            |
|           | 241201         | 1 birth or more | age <= 25      | yes                    | no                   | 784                                       | 792                            |
|           | 241704         | 1 birth or more | age <= 25      | no                     | yes                  | 751                                       | 751                            |
|           | 242909         | 0 births        | age <= 25      | no                     | yes                  | 132                                       | 132                            |
|           | 243511         | 1 birth or more | 25 < age <= 35 | no                     | yes                  | 745                                       | 745                            |
|           | 243803         | 1 birth or more | age <= 25      | no                     | yes                  | 120                                       | 120                            |
|           | 243810         | 1 birth or more | 25 < age <= 35 | no                     | yes                  | 36                                        | 36                             |
|           | 244003         | 1 birth or more | 25 < age <= 35 | yes                    | no                   | 84                                        | 451                            |
|           | 244109         | 1 birth or more | 25 < age <= 35 | no                     | yes                  | 443                                       | 443                            |
|           | 244316         | 0 births        | 25 < age <= 35 | yes                    | no                   | 189                                       | 189                            |
|           | 244422         | 0 births        | age <= 25      | no                     | yes                  | 741                                       | 741                            |
|           | 244601         | 1 birth or more | age <= 25      | no                     | yes                  | 29                                        | 29                             |
|           | 244937         | 1 birth or more | 25 < age <= 35 | no                     | yes                  | 185                                       | 185                            |

**Table 14.1.2 / 35: Listing of subjects with expulsions (FAS)**

| TREATMENT | Subject number | Parity          | Age category   | IUS partially expelled | IUS totally expelled | Time to at least partial expulsion [days] | Time to total expulsion [days] |
|-----------|----------------|-----------------|----------------|------------------------|----------------------|-------------------------------------------|--------------------------------|
|           | 245003         | 1 birth or more | 25 < age <= 35 | yes                    | no                   | 277                                       | 311                            |
|           | 245402         | 1 birth or more | 25 < age <= 35 | no                     | yes                  | 544                                       | 544                            |
|           | 245415         | 1 birth or more | 25 < age <= 35 | no                     | yes                  | 561                                       | 561                            |
|           | 245907         | 0 births        | 25 < age <= 35 | yes                    | no                   | 85                                        | 85                             |
|           | 245932         | 0 births        | 25 < age <= 35 | yes                    | no                   | 277                                       | 295                            |
|           | 245934         | 1 birth or more | age <= 25      | yes                    | no                   | 92                                        | 92                             |
|           | 246121         | 1 birth or more | 25 < age <= 35 | no                     | yes                  | 317                                       | 317                            |
|           | 246125         | 1 birth or more | 25 < age <= 35 | no                     | yes                  | 638                                       | 638                            |
|           | 246212         | 0 births        | age <= 25      | no                     | yes                  | 923                                       | 923                            |
| LCS16     | 120318         | 1 birth or more | 25 < age <= 35 | no                     | yes                  | 816                                       | 816                            |
|           | 120319         | 0 births        | age <= 25      | no                     | yes                  | 93                                        | 93                             |
|           | 160303         | 1 birth or more | 25 < age <= 35 | yes                    | no                   | 92                                        | 290                            |
|           | 160318         | 1 birth or more | age <= 25      | yes                    | no                   | 65                                        | 85                             |
|           | 160621         | 1 birth or more | 25 < age <= 35 | yes                    | no                   | 174                                       | 392                            |
|           | 170103         | 1 birth or more | 25 < age <= 35 | yes                    | no                   | 92                                        | 92                             |
|           | 170303         | 1 birth or more | 25 < age <= 35 | yes                    | no                   | 771                                       | 877                            |
|           | 180121         | 1 birth or more | 25 < age <= 35 | yes                    | no                   | 594                                       | 594                            |
|           | 180134         | 1 birth or more | 25 < age <= 35 | yes                    | no                   | 371                                       | 371                            |
|           | 180219         | 1 birth or more | 25 < age <= 35 | no                     | yes                  | 43                                        | 43                             |
|           | 180226         | 1 birth or more | 25 < age <= 35 | no                     | yes                  | 313                                       | 313                            |
|           | 180634         | 1 birth or more | 25 < age <= 35 | yes                    | no                   | 1                                         | 288                            |
|           | 180653         | 1 birth or more | 25 < age <= 35 | yes                    | no                   | 90                                        | 244                            |
|           | 180656         | 1 birth or more | 25 < age <= 35 | yes                    | no                   | 92                                        | 287                            |
|           | 180679         | 1 birth or more | 25 < age <= 35 | yes                    | no                   | 101                                       | 275                            |
|           | 180682         | 1 birth or more | 25 < age <= 35 | no                     | yes                  | 1                                         | 1                              |
|           | 190611         | 1 birth or more | 25 < age <= 35 | yes                    | no                   | 275                                       | 1119                           |
|           | 190627         | 1 birth or more | age <= 25      | no                     | yes                  | 84                                        | 84                             |
|           | 240133         | 1 birth or more | age <= 25      | yes                    | no                   | 622                                       | 622                            |
|           | 240354         | 1 birth or more | age <= 25      | yes                    | no                   | 56                                        | 56                             |
|           | 240822         | 0 births        | age <= 25      | yes                    | no                   | 183                                       | 183                            |
|           | 240901         | 0 births        | 25 < age <= 35 | yes                    | no                   | 76                                        | 76                             |
|           | 241195         | 1 birth or more | age <= 25      | no                     | yes                  | 153                                       | 153                            |
|           | 241540         | 1 birth or more | 25 < age <= 35 | yes                    | no                   | 190                                       | 190                            |
|           | 241732         | 1 birth or more | age <= 25      | yes                    | no                   | 32                                        | 32                             |
|           | 242507         | 0 births        | 25 < age <= 35 | no                     | yes                  | 279                                       | 279                            |
|           | 243034         | 1 birth or more | age <= 25      | no                     | yes                  | 494                                       | 494                            |
|           | 243101         | 1 birth or more | 25 < age <= 35 | yes                    | no                   | 1097                                      | 1097                           |
|           | 243108         | 1 birth or more | age <= 25      | yes                    | no                   | 1                                         | 32                             |
|           | 243109         | 1 birth or more | age <= 25      | yes                    | no                   | 191                                       | 609                            |
|           | 243208         | 1 birth or more | 25 < age <= 35 | no                     | yes                  | 410                                       | 410                            |
|           | 243604         | 1 birth or more | age <= 25      | yes                    | no                   | 303                                       | 1097                           |
|           | 243703         | 1 birth or more | 25 < age <= 35 | no                     | yes                  | 791                                       | 791                            |
|           | 243918         | 0 births        | age <= 25      | yes                    | no                   | 908                                       | 908                            |



**Table 14.1.2 / 35: Listing of subjects with expulsions (FAS)**

| TREATMENT | Subject number | Parity          | Age category   | IUS partially expelled | IUS totally expelled | Time to at least partial expulsion [days] | Time to total expulsion [days] |
|-----------|----------------|-----------------|----------------|------------------------|----------------------|-------------------------------------------|--------------------------------|
|           | 243936         | 0 births        | 25 < age <= 35 | yes                    | no                   | 90                                        | 664                            |
|           | 243954         | 1 birth or more | age <= 25      | no                     | yes                  | 788                                       | 788                            |
|           | 244114         | 0 births        | age <= 25      | yes                    | no                   | 92                                        | 92                             |
|           | 244309         | 1 birth or more | age <= 25      | yes                    | no                   | 28                                        | 28                             |
|           | 244715         | 1 birth or more | 25 < age <= 35 | yes                    | no                   | 100                                       | 100                            |
|           | 244916         | 0 births        | age <= 25      | yes                    | no                   | 1                                         | 1113                           |
|           | 244933         | 1 birth or more | 25 < age <= 35 | no                     | yes                  | 276                                       | 276                            |
|           | 245031         | 0 births        | age <= 25      | yes                    | no                   | 243                                       | 243                            |
|           | 245404         | 1 birth or more | 25 < age <= 35 | yes                    | no                   | 268                                       | 268                            |
|           | 245406         | 1 birth or more | 25 < age <= 35 | no                     | yes                  | 205                                       | 205                            |
|           | 245408         | 1 birth or more | 25 < age <= 35 | no                     | yes                  | 881                                       | 881                            |
|           | 246120         | 1 birth or more | age <= 25      | no                     | yes                  | 1037                                      | 1037                           |

Global Biostatistics: /by-sasp/patdb/projects/de04209/310442/stat/prod\_interim03/pgms/t-expul.sas epkl1 07OCT2011 10:52

End of table

**Table 14.1.2 / 36: Probability of at least partial expulsion by treatment (Kaplan-Meier analysis) (FAS)**

| Treatment | Month | number of subjects still under treatment | cumulative number of expulsions | estimated cumulative probability of expulsion [%] |
|-----------|-------|------------------------------------------|---------------------------------|---------------------------------------------------|
| LCS12     | 0     | 1426                                     | 0                               | 0.00                                              |
|           | 6     | 1283                                     | 15                              | 1.10                                              |
|           | 12    | 1162                                     | 29                              | 2.22                                              |
|           | 18    | 1060                                     | 33                              | 2.57                                              |
|           | 24    | 960                                      | 40                              | 3.25                                              |
|           | 30    | 889                                      | 45                              | 3.76                                              |
|           | 36    | 271                                      | 52                              | 4.56                                              |
| LCS16     | 0     | 1445                                     | 0                               | 0.00                                              |
|           | 6     | 1314                                     | 22                              | 1.58                                              |
|           | 12    | 1199                                     | 33                              | 2.43                                              |
|           | 18    | 1104                                     | 36                              | 2.68                                              |
|           | 24    | 1008                                     | 38                              | 2.86                                              |
|           | 30    | 924                                      | 44                              | 3.47                                              |
|           | 36    | 305                                      | 45                              | 3.58                                              |
| Total     | 0     | 2871                                     | 0                               | 0.00                                              |
|           | 6     | 2597                                     | 37                              | 1.34                                              |
|           | 12    | 2361                                     | 62                              | 2.32                                              |
|           | 18    | 2164                                     | 69                              | 2.62                                              |
|           | 24    | 1968                                     | 78                              | 3.05                                              |
|           | 30    | 1813                                     | 89                              | 3.61                                              |
|           | 36    | 576                                      | 97                              | 4.05                                              |

GB: /by-sasp/patdb/projects/de04209/310442/stat/prod\_interim03/pgms/t-expul-km-part-all.sas epkl 07OCT2011 10:52

End of table

**Table 14.1.2 / 37: Probability of at least partial expulsion by treatment by parity (Kaplan-Meier analysis) (FAS)**

Parity: 0 births

| Treatment | Month | number of subjects still under treatment | cumulative number of expulsions | estimated cumulative probability of expulsion [%] |
|-----------|-------|------------------------------------------|---------------------------------|---------------------------------------------------|
| LCS12     | 0     | 551                                      | 0                               | 0.00                                              |
|           | 6     | 492                                      | 2                               | 0.39                                              |
|           | 12    | 438                                      | 9                               | 1.90                                              |
|           | 18    | 397                                      | 10                              | 2.13                                              |
|           | 24    | 354                                      | 12                              | 2.65                                              |
|           | 30    | 336                                      | 13                              | 2.93                                              |
|           | 36    | 85                                       | 15                              | 3.51                                              |
| LCS16     | 0     | 570                                      | 0                               | 0.00                                              |
|           | 6     | 509                                      | 5                               | 0.92                                              |
|           | 12    | 457                                      | 8                               | 1.52                                              |
|           | 18    | 422                                      | 8                               | 1.52                                              |
|           | 24    | 380                                      | 8                               | 1.52                                              |
|           | 30    | 355                                      | 9                               | 1.80                                              |
|           | 36    | 107                                      | 9                               | 1.80                                              |
| Total     | 0     | 1121                                     | 0                               | 0.00                                              |
|           | 6     | 1001                                     | 7                               | 0.66                                              |
|           | 12    | 895                                      | 17                              | 1.70                                              |
|           | 18    | 819                                      | 18                              | 1.81                                              |
|           | 24    | 734                                      | 20                              | 2.07                                              |
|           | 30    | 691                                      | 22                              | 2.35                                              |
|           | 36    | 192                                      | 24                              | 2.63                                              |

GB: /by-sasp/patdb/projects/de04209/310442/stat/prod\_interim03/pgms/t-expul-km-part-par.sas epkl 07OCT2011 10:52

Table 14.1.2 / 37: Probability of at least partial expulsion by treatment by parity (Kaplan-Meier analysis) (FAS) (cont.)

Parity: 1 birth or more

| Treatment | Month | number of subjects still under treatment | cumulative number of expulsions | estimated cumulative probability of expulsion [%] |
|-----------|-------|------------------------------------------|---------------------------------|---------------------------------------------------|
| LCS12     | 0     | 875                                      | 0                               | 0.00                                              |
|           | 6     | 791                                      | 13                              | 1.54                                              |
|           | 12    | 723                                      | 20                              | 2.43                                              |
|           | 18    | 663                                      | 23                              | 2.86                                              |
|           | 24    | 606                                      | 28                              | 3.62                                              |
|           | 30    | 553                                      | 32                              | 4.28                                              |
|           | 36    | 186                                      | 37                              | 5.19                                              |
| LCS16     | 0     | 875                                      | 0                               | 0.00                                              |
|           | 6     | 805                                      | 17                              | 1.99                                              |
|           | 12    | 742                                      | 25                              | 3.00                                              |
|           | 18    | 682                                      | 28                              | 3.40                                              |
|           | 24    | 628                                      | 30                              | 3.69                                              |
|           | 30    | 569                                      | 35                              | 4.49                                              |
|           | 36    | 198                                      | 36                              | 4.67                                              |
| Total     | 0     | 1750                                     | 0                               | 0.00                                              |
|           | 6     | 1596                                     | 30                              | 1.77                                              |
|           | 12    | 1465                                     | 45                              | 2.72                                              |
|           | 18    | 1345                                     | 51                              | 3.13                                              |
|           | 24    | 1234                                     | 58                              | 3.65                                              |
|           | 30    | 1122                                     | 67                              | 4.38                                              |
|           | 36    | 384                                      | 73                              | 4.92                                              |

GB: /by-sasp/patdb/projects/de04209/310442/stat/prod\_interim03/pgms/t-expul-km-part-par.sas epkll 07OCT2011 10:52

End of table

**Table 14.1.2 / 38: Probability of at least partial expulsion by treatment by age group (Kaplan-Meier analysis) (FAS)**

Age category: age &lt;= 25

| Treatment | Month | number of subjects still under treatment | cumulative number of expulsions | estimated cumulative probability of expulsion [%] |
|-----------|-------|------------------------------------------|---------------------------------|---------------------------------------------------|
| LCS12     | 0     | 560                                      | 0                               | 0.00                                              |
|           | 6     | 493                                      | 8                               | 1.52                                              |
|           | 12    | 434                                      | 13                              | 2.56                                              |
|           | 18    | 392                                      | 14                              | 2.79                                              |
|           | 24    | 354                                      | 15                              | 3.04                                              |
|           | 30    | 326                                      | 19                              | 4.16                                              |
|           | 36    | 86                                       | 24                              | 5.73                                              |
| LCS16     | 0     | 562                                      | 0                               | 0.00                                              |
|           | 6     | 508                                      | 10                              | 1.83                                              |
|           | 12    | 457                                      | 14                              | 2.62                                              |
|           | 18    | 424                                      | 15                              | 2.85                                              |
|           | 24    | 381                                      | 16                              | 3.09                                              |
|           | 30    | 351                                      | 18                              | 3.63                                              |
|           | 36    | 107                                      | 19                              | 3.91                                              |
| Total     | 0     | 1122                                     | 0                               | 0.00                                              |
|           | 6     | 1001                                     | 18                              | 1.67                                              |
|           | 12    | 891                                      | 27                              | 2.59                                              |
|           | 18    | 816                                      | 29                              | 2.81                                              |
|           | 24    | 735                                      | 31                              | 3.06                                              |
|           | 30    | 677                                      | 37                              | 3.88                                              |
|           | 36    | 193                                      | 43                              | 4.78                                              |

GB: /by-sasp/patdb/projects/de04209/310442/stat/prod\_interim03/pgms/t-expul-km-part-age.sas epkl1 07OCT2011 10:53

Table 14.1.2 / 38: Probability of at least partial expulsion by treatment by age group (Kaplan-Meier analysis) (FAS)  
 (cont.)

Age category: 25 &lt; age &lt;= 35

| Treatment | Month | number of subjects still under treatment | cumulative number of expulsions | estimated cumulative probability of expulsion [%] |
|-----------|-------|------------------------------------------|---------------------------------|---------------------------------------------------|
| LCS12     | 0     | 866                                      | 0                               | 0.00                                              |
|           | 6     | 790                                      | 7                               | 0.83                                              |
|           | 12    | 726                                      | 16                              | 2.00                                              |
|           | 18    | 668                                      | 19                              | 2.43                                              |
|           | 24    | 606                                      | 25                              | 3.35                                              |
|           | 30    | 563                                      | 26                              | 3.51                                              |
|           | 36    | 185                                      | 28                              | 3.87                                              |
| LCS16     | 0     | 883                                      | 0                               | 0.00                                              |
|           | 6     | 806                                      | 12                              | 1.41                                              |
|           | 12    | 742                                      | 19                              | 2.30                                              |
|           | 18    | 680                                      | 21                              | 2.57                                              |
|           | 24    | 627                                      | 22                              | 2.71                                              |
|           | 30    | 573                                      | 26                              | 3.36                                              |
|           | 36    | 198                                      | 26                              | 3.36                                              |
| Total     | 0     | 1749                                     | 0                               | 0.00                                              |
|           | 6     | 1596                                     | 19                              | 1.12                                              |
|           | 12    | 1468                                     | 35                              | 2.15                                              |
|           | 18    | 1348                                     | 40                              | 2.50                                              |
|           | 24    | 1233                                     | 47                              | 3.03                                              |
|           | 30    | 1136                                     | 52                              | 3.43                                              |
|           | 36    | 383                                      | 54                              | 3.61                                              |

GB: /by-sasp/patdb/projects/de04209/310442/stat/prod\_interim03/pgms/t-expul-km-part-age.sas epkl 07OCT2011 10:53

End of table

**Table 14.1.2 / 39: Probability of at total expulsion by treatment (Kaplan-Meier analysis) (FAS)**

| Treatment | Month | number of subjects still under treatment | cumulative number of expulsions | estimated cumulative probability of expulsion [%] |
|-----------|-------|------------------------------------------|---------------------------------|---------------------------------------------------|
| LCS12     | 0     | 1426                                     | 0                               | 0.00                                              |
|           | 6     | 1285                                     | 8                               | 0.58                                              |
|           | 12    | 1162                                     | 12                              | 0.90                                              |
|           | 18    | 1060                                     | 15                              | 1.17                                              |
|           | 24    | 960                                      | 19                              | 1.56                                              |
|           | 30    | 889                                      | 23                              | 1.98                                              |
|           | 36    | 271                                      | 29                              | 2.68                                              |
| LCS16     | 0     | 1445                                     | 0                               | 0.00                                              |
|           | 6     | 1322                                     | 5                               | 0.36                                              |
|           | 12    | 1205                                     | 9                               | 0.68                                              |
|           | 18    | 1109                                     | 11                              | 0.85                                              |
|           | 24    | 1011                                     | 11                              | 0.85                                              |
|           | 30    | 927                                      | 15                              | 1.26                                              |
|           | 36    | 308                                      | 16                              | 1.37                                              |
| Total     | 0     | 2871                                     | 0                               | 0.00                                              |
|           | 6     | 2607                                     | 13                              | 0.47                                              |
|           | 12    | 2367                                     | 21                              | 0.79                                              |
|           | 18    | 2169                                     | 26                              | 1.01                                              |
|           | 24    | 1971                                     | 30                              | 1.20                                              |
|           | 30    | 1816                                     | 38                              | 1.61                                              |
|           | 36    | 579                                      | 45                              | 2.01                                              |

GB: /by-sasp/patdb/projects/de04209/310442/stat/prod\_interim03/pgms/t-expul-km-tot-all.sas epkl 07OCT2011 10:53

End of table

**Table 14.1.2 / 40: Probability of at total expulsion by treatment by parity (Kaplan-Meier analysis) (FAS)**

Parity: 0 births

| Treatment | Month | number of subjects still under treatment | cumulative number of expulsions | estimated cumulative probability of expulsion [%] |
|-----------|-------|------------------------------------------|---------------------------------|---------------------------------------------------|
| LCS12     | 0     | 551                                      | 0                               | 0.00                                              |
|           | 6     | 492                                      | 1                               | 0.20                                              |
|           | 12    | 438                                      | 1                               | 0.20                                              |
|           | 18    | 397                                      | 2                               | 0.43                                              |
|           | 24    | 354                                      | 2                               | 0.43                                              |
|           | 30    | 336                                      | 3                               | 0.71                                              |
|           | 36    | 85                                       | 5                               | 1.31                                              |
| LCS16     | 0     | 570                                      | 0                               | 0.00                                              |
|           | 6     | 511                                      | 1                               | 0.19                                              |
|           | 12    | 459                                      | 2                               | 0.40                                              |
|           | 18    | 424                                      | 2                               | 0.40                                              |
|           | 24    | 381                                      | 2                               | 0.40                                              |
|           | 30    | 356                                      | 2                               | 0.40                                              |
|           | 36    | 108                                      | 2                               | 0.40                                              |
| Total     | 0     | 1121                                     | 0                               | 0.00                                              |
|           | 6     | 1003                                     | 2                               | 0.19                                              |
|           | 12    | 897                                      | 3                               | 0.30                                              |
|           | 18    | 821                                      | 4                               | 0.41                                              |
|           | 24    | 735                                      | 4                               | 0.41                                              |
|           | 30    | 692                                      | 5                               | 0.55                                              |
|           | 36    | 193                                      | 7                               | 0.84                                              |

GB: /by-sasp/patdb/projects/de04209/310442/stat/prod\_interim03/pgms/t-expul-km-tot-par.sas epkl1 07OCT2011 10:53



Table 14.1.2 / 40: Probability of at total expulsion by treatment by parity (Kaplan-Meier analysis) (FAS) (cont.)

Parity: 1 birth or more

| Treatment | Month | number of subjects still under treatment | cumulative number of expulsions | estimated cumulative probability of expulsion [%] |
|-----------|-------|------------------------------------------|---------------------------------|---------------------------------------------------|
| LCS12     | 0     | 875                                      | 0                               | 0.00                                              |
|           | 6     | 793                                      | 7                               | 0.82                                              |
|           | 12    | 724                                      | 11                              | 1.34                                              |
|           | 18    | 663                                      | 13                              | 1.63                                              |
|           | 24    | 606                                      | 17                              | 2.24                                              |
|           | 30    | 553                                      | 20                              | 2.74                                              |
|           | 36    | 186                                      | 24                              | 3.50                                              |
| LCS16     | 0     | 875                                      | 0                               | 0.00                                              |
|           | 6     | 811                                      | 4                               | 0.47                                              |
|           | 12    | 746                                      | 7                               | 0.85                                              |
|           | 18    | 685                                      | 9                               | 1.13                                              |
|           | 24    | 630                                      | 9                               | 1.13                                              |
|           | 30    | 571                                      | 13                              | 1.79                                              |
|           | 36    | 200                                      | 14                              | 1.97                                              |
| Total     | 0     | 1750                                     | 0                               | 0.00                                              |
|           | 6     | 1604                                     | 11                              | 0.65                                              |
|           | 12    | 1470                                     | 18                              | 1.09                                              |
|           | 18    | 1348                                     | 22                              | 1.38                                              |
|           | 24    | 1236                                     | 26                              | 1.68                                              |
|           | 30    | 1124                                     | 33                              | 2.26                                              |
|           | 36    | 386                                      | 38                              | 2.72                                              |

GB: /by-sasp/patdb/projects/de04209/310442/stat/prod\_interim03/pgms/t-expul-km-tot-par.sas epkl1 07OCT2011 10:53

End of table

**Table 14.1.2 / 41: Probability of at total expulsion by treatment by age group (Kaplan-Meier analysis) (FAS)**

Age category: age &lt;= 25

| Treatment | Month | number of subjects still under treatment | cumulative number of expulsions | estimated cumulative probability of expulsion [%] |
|-----------|-------|------------------------------------------|---------------------------------|---------------------------------------------------|
| LCS12     | 0     | 560                                      | 0                               | 0.00                                              |
|           | 6     | 494                                      | 4                               | 0.76                                              |
|           | 12    | 435                                      | 6                               | 1.17                                              |
|           | 18    | 392                                      | 7                               | 1.40                                              |
|           | 24    | 354                                      | 7                               | 1.40                                              |
|           | 30    | 326                                      | 10                              | 2.26                                              |
|           | 36    | 86                                       | 14                              | 3.55                                              |
| LCS16     | 0     | 562                                      | 0                               | 0.00                                              |
|           | 6     | 509                                      | 3                               | 0.56                                              |
|           | 12    | 460                                      | 3                               | 0.56                                              |
|           | 18    | 427                                      | 4                               | 0.79                                              |
|           | 24    | 383                                      | 4                               | 0.79                                              |
|           | 30    | 353                                      | 5                               | 1.06                                              |
|           | 36    | 109                                      | 6                               | 1.36                                              |
| Total     | 0     | 1122                                     | 0                               | 0.00                                              |
|           | 6     | 1003                                     | 7                               | 0.66                                              |
|           | 12    | 895                                      | 9                               | 0.86                                              |
|           | 18    | 819                                      | 11                              | 1.09                                              |
|           | 24    | 737                                      | 11                              | 1.09                                              |
|           | 30    | 679                                      | 15                              | 1.65                                              |
|           | 36    | 195                                      | 20                              | 2.42                                              |

GB: /by-sasp/patdb/projects/de04209/310442/stat/prod\_interim03/pgms/t-expul-km-tot-age.sas epkl 07OCT2011 10:53

Table 14.1.2 / 41: Probability of at total expulsion by treatment by age group (Kaplan-Meier analysis) (FAS) (cont.)

Age category: 25 &lt; age &lt;= 35

| Treatment | Month | number of subjects still under treatment | cumulative number of expulsions | estimated cumulative probability of expulsion [%] |
|-----------|-------|------------------------------------------|---------------------------------|---------------------------------------------------|
| LCS12     | 0     | 866                                      | 0                               | 0.00                                              |
|           | 6     | 791                                      | 4                               | 0.47                                              |
|           | 12    | 727                                      | 6                               | 0.73                                              |
|           | 18    | 668                                      | 8                               | 1.02                                              |
|           | 24    | 606                                      | 12                              | 1.64                                              |
|           | 30    | 563                                      | 13                              | 1.80                                              |
|           | 36    | 185                                      | 15                              | 2.17                                              |
| LCS16     | 0     | 883                                      | 0                               | 0.00                                              |
|           | 6     | 813                                      | 2                               | 0.23                                              |
|           | 12    | 745                                      | 6                               | 0.74                                              |
|           | 18    | 682                                      | 7                               | 0.88                                              |
|           | 24    | 628                                      | 7                               | 0.88                                              |
|           | 30    | 574                                      | 10                              | 1.38                                              |
|           | 36    | 199                                      | 10                              | 1.38                                              |
| Total     | 0     | 1749                                     | 0                               | 0.00                                              |
|           | 6     | 1604                                     | 6                               | 0.35                                              |
|           | 12    | 1472                                     | 12                              | 0.74                                              |
|           | 18    | 1350                                     | 15                              | 0.95                                              |
|           | 24    | 1234                                     | 19                              | 1.26                                              |
|           | 30    | 1137                                     | 23                              | 1.59                                              |
|           | 36    | 384                                      | 25                              | 1.77                                              |

GB: /by-sasp/patdb/projects/de04209/310442/stat/prod\_interim03/pgms/t-expul-km-tot-age.sas epkl 07OCT2011 10:53

End of table

**Table 14.1.2 / 42: Proportion of subjects who are compliant by time point (Kaplan-Meier analysis) (FAS)**

| Treatment | Period        | half yearly rate of non-compliance [%] | cumulative rate of non-compliance [%] | cumulative rate of compliance [%] |
|-----------|---------------|----------------------------------------|---------------------------------------|-----------------------------------|
| LCS12     | 1st half year | 1.68                                   | 1.68                                  | 98.32                             |
|           | 2nd half year | 1.87                                   | 3.51                                  | 96.49                             |
|           | 3rd half year | 0.63                                   | 4.13                                  | 95.87                             |
|           | 4th half year | 1.10                                   | 5.18                                  | 94.82                             |
|           | 5th half year | 0.86                                   | 6.00                                  | 94.00                             |
|           | 6th half year | 1.73                                   | 7.62                                  | 92.38                             |
| LCS16     | 1st half year | 2.57                                   | 2.57                                  | 97.43                             |
|           | 2nd half year | 1.35                                   | 3.88                                  | 96.12                             |
|           | 3rd half year | 0.26                                   | 4.13                                  | 95.87                             |
|           | 4th half year | 0.66                                   | 4.76                                  | 95.24                             |
|           | 5th half year | 0.94                                   | 5.65                                  | 94.35                             |
|           | 6th half year | 0.33                                   | 5.97                                  | 94.03                             |
| Total     | 1st half year | 2.13                                   | 2.13                                  | 97.87                             |
|           | 2nd half year | 1.60                                   | 3.70                                  | 96.30                             |
|           | 3rd half year | 0.44                                   | 4.12                                  | 95.88                             |
|           | 4th half year | 0.87                                   | 4.96                                  | 95.04                             |
|           | 5th half year | 0.90                                   | 5.82                                  | 94.18                             |
|           | 6th half year | 1.01                                   | 6.77                                  | 93.23                             |

Note: Any documented IUS position other than 'in situ' or 'displaced, intrauterine' was considered non-compliant regardless of the reason

Global Biostatistics: /by-sasp/patdb/projects/de04209/310442/stat/prod\_interim03/pgms/t-compl-km.sas epkl1 07OCT2011 10:53

End of table

### 14.1.3 Exposure

**Table 14.1.3 / 1: Extent of exposure - descriptive statistics by treatment (FAS)**

|                              |        | LCS12     | LCS16     | Total     |
|------------------------------|--------|-----------|-----------|-----------|
| Exposure to treatment [days] | n      | 1432      | 1452      | 2884      |
|                              | Mean   | 820.5     | 843.0     | 831.8     |
|                              | SD     | 376.0     | 365.5     | 370.8     |
|                              | Min    | 1         | 1         | 1         |
|                              | Q1     | 528.0     | 562.5     | 550.0     |
|                              | Median | 1085.0    | 1086.0    | 1085.0    |
|                              | Q3     | 1093.5    | 1094.0    | 1094.0    |
|                              | Max    | 1205      | 1248      | 1248      |
|                              | Sum    | 1174915.0 | 1223998.0 | 2398913.0 |
| Woman-years                  | n      | 1432      | 1452      | 2884      |
|                              | Mean   | 2.25      | 2.31      | 2.28      |
|                              | SD     | 1.03      | 1.00      | 1.02      |
|                              | Min    | 0.0       | 0.0       | 0.0       |
|                              | Q1     | 1.45      | 1.54      | 1.51      |
|                              | Median | 2.97      | 2.98      | 2.97      |
|                              | Q3     | 3.00      | 3.00      | 3.00      |
|                              | Max    | 3.3       | 3.4       | 3.4       |
|                              | Sum    | 3218.95   | 3353.42   | 6572.36   |

For this presentation a woman-year equals 365 days

Global Biostatistics: /by-sasp/patdb/projects/de04209/310442/stat/prod\_interim03/pgms/t-expos-saf.sas epkl 07OCT2011 10:53

End of table

## **14.2 Efficacy**

### **14.2.1 Contraceptive efficacy**



**Table 14.2.1 / 1: Contraceptive efficacy by treatment (FAS)**

Pearl Index: unadj.

| Time    | TREATMENT | Number of subjects | Total exposure [WY] | Excluded exposure [WY] | Relevant exposure [WY] | Number of pregnancies | Pearl index | Lower 95% CIL | Upper 95% CIL |
|---------|-----------|--------------------|---------------------|------------------------|------------------------|-----------------------|-------------|---------------|---------------|
| overall | LCS12     | 1432               | 3217.01             | 153.31                 | 3063.70                | 10                    | 0.33        | 0.16          | 0.60          |
|         | LCS16     | 1452               | 3351.99             | 129.92                 | 3222.07                | 10                    | 0.31        | 0.15          | 0.57          |
| year 1  | LCS12     | 1432               | 1280.22             | 62.44                  | 1217.78                | 5                     | 0.41        | 0.13          | 0.96          |
|         | LCS16     | 1452               | 1316.37             | 63.59                  | 1252.78                | 2                     | 0.16        | 0.02          | 0.58          |
| year 2  | LCS12     | 1162               | 1056.98             | 41.31                  | 1015.67                | 3                     | 0.30        | 0.06          | 0.86          |
|         | LCS16     | 1206               | 1105.32             | 37.83                  | 1067.49                | 4                     | 0.37        | 0.10          | 0.96          |
| year 3  | LCS12     | 960                | 870.42              | 45.25                  | 825.17                 | 2                     | 0.24        | 0.03          | 0.88          |
|         | LCS16     | 1010               | 918.30              | 27.21                  | 891.09                 | 4                     | 0.45        | 0.12          | 1.15          |
| 2 years | LCS12     | 1432               | 2337.20             | 103.75                 | 2233.45                | 8                     | 0.36        | 0.15          | 0.71          |
|         | LCS16     | 1452               | 2421.69             | 101.42                 | 2320.27                | 6                     | 0.26        | 0.09          | 0.56          |
| 3 years | LCS12     | 1432               | 3207.62             | 149.00                 | 3058.62                | 10                    | 0.33        | 0.16          | 0.60          |
|         | LCS16     | 1452               | 3339.99             | 128.63                 | 3211.36                | 10                    | 0.31        | 0.15          | 0.57          |

Note: WY = women years, 1 WY equals to 365 days, CIL = confidence interval limit

Global Biostatistics: /by-sasp/patdb/projects/de04209/310442/stat/prod\_interim03/pgms/t-eff-pi-all.sas sgrpp 27OCT2011 12:52

Table 14.2.1 / 1: Contraceptive efficacy by treatment (FAS) (cont.)

Pearl Index: adj.

| Time    | TREATMENT | Number of subjects | Total exposure [WY] | Excluded exposure [WY] | Relevant exposure [WY] | Number of pregnancies | Pearl index | Lower 95% CIL | Upper 95% CIL |
|---------|-----------|--------------------|---------------------|------------------------|------------------------|-----------------------|-------------|---------------|---------------|
| overall | LCS12     | 1432               | 3191.55             | 150.61                 | 3040.95                | 10                    | 0.33        | 0.16          | 0.60          |
|         | LCS16     | 1452               | 3320.24             | 127.77                 | 3192.47                | 10                    | 0.31        | 0.15          | 0.58          |
| year 1  | LCS12     | 1432               | 1270.42             | 61.59                  | 1208.82                | 5                     | 0.41        | 0.13          | 0.97          |
|         | LCS16     | 1452               | 1300.92             | 62.29                  | 1238.62                | 2                     | 0.16        | 0.02          | 0.58          |
| year 2  | LCS12     | 1155               | 1048.64             | 40.08                  | 1008.56                | 3                     | 0.30        | 0.06          | 0.87          |
|         | LCS16     | 1198               | 1095.63             | 37.27                  | 1058.36                | 4                     | 0.38        | 0.10          | 0.97          |
| year 3  | LCS12     | 953                | 863.44              | 44.76                  | 818.68                 | 2                     | 0.24        | 0.03          | 0.88          |
|         | LCS16     | 1000               | 911.70              | 26.92                  | 884.78                 | 4                     | 0.45        | 0.12          | 1.16          |
| 2 years | LCS12     | 1432               | 2319.06             | 101.67                 | 2217.38                | 8                     | 0.36        | 0.16          | 0.71          |
|         | LCS16     | 1452               | 2396.55             | 99.56                  | 2296.99                | 6                     | 0.26        | 0.10          | 0.57          |
| 3 years | LCS12     | 1432               | 3182.50             | 146.43                 | 3036.07                | 10                    | 0.33        | 0.16          | 0.61          |
|         | LCS16     | 1452               | 3308.24             | 126.47                 | 3181.77                | 10                    | 0.31        | 0.15          | 0.58          |

Note: WY = women years, 1 WY equals to 365 days, CIL = confidence interval limit

Global Biostatistics: /by-sasp/patdb/projects/de04209/310442/stat/prod\_interim03/pgms/t-eff-pi-all.sas sgrpp 27OCT2011 12:52

End of table

**Table 14.2.1 / 2: Contraceptive efficacy by treatment and age-group (FAS)**

 Pearl Index: unadj.  
 Age group: age <= 25

| Time    | TREATMENT | Number of subjects | Total exposure [WY] | Excluded exposure [WY] | Relevant exposure [WY] | Number of pregnancies | Pearl index | Lower 95% CIL | Upper 95% CIL |
|---------|-----------|--------------------|---------------------|------------------------|------------------------|-----------------------|-------------|---------------|---------------|
| overall | LCS12     | 566                | 1202.58             | 86.18                  | 1116.41                | 4                     | 0.36        | 0.10          | 0.92          |
|         | LCS16     | 564                | 1284.62             | 73.22                  | 1211.40                | 2                     | 0.17        | 0.02          | 0.60          |
| year 1  | LCS12     | 566                | 491.49              | 35.87                  | 455.62                 | 1                     | 0.22        | 0.01          | 1.22          |
|         | LCS16     | 564                | 508.48              | 35.16                  | 473.33                 | 1                     | 0.21        | 0.01          | 1.18          |
| year 2  | LCS12     | 435                | 392.29              | 24.00                  | 368.29                 | 2                     | 0.54        | 0.07          | 1.96          |
|         | LCS16     | 461                | 423.65              | 23.01                  | 400.65                 | 0                     | 0.00        | 0.00          | 0.92          |
| year 3  | LCS12     | 354                | 315.24              | 24.95                  | 290.30                 | 1                     | 0.34        | 0.01          | 1.92          |
|         | LCS16     | 383                | 347.48              | 14.27                  | 333.21                 | 1                     | 0.30        | 0.01          | 1.67          |
| 2 years | LCS12     | 566                | 883.78              | 59.87                  | 823.92                 | 3                     | 0.36        | 0.08          | 1.06          |
|         | LCS16     | 564                | 932.14              | 58.16                  | 873.98                 | 1                     | 0.11        | 0.00          | 0.64          |
| 3 years | LCS12     | 566                | 1199.03             | 84.82                  | 1114.21                | 4                     | 0.36        | 0.10          | 0.92          |
|         | LCS16     | 564                | 1279.62             | 72.43                  | 1207.19                | 2                     | 0.17        | 0.02          | 0.60          |

Note: WY = women years, 1 WY equals to 365 days, CIL = confidence interval limit

Global Biostatistics: /by-sasp/patdb/projects/de04209/310442/stat/prod\_interim03/pgms/t-eff-pi-age.sas sgrpp 27OCT2011 12:52

Table 14.2.1 / 2: Contraceptive efficacy by treatment and age-group (FAS) (cont.)

Pearl Index: unadj.

Age group: 25 < age <= 35

| Time    | TREATMENT | Number of subjects | Total exposure [WY] | Excluded exposure [WY] | Relevant exposure [WY] | Number of pregnancies | Pearl index | Lower 95% CIL | Upper 95% CIL |
|---------|-----------|--------------------|---------------------|------------------------|------------------------|-----------------------|-------------|---------------|---------------|
| overall | LCS12     | 866                | 2014.42             | 67.13                  | 1947.29                | 6                     | 0.31        | 0.11          | 0.67          |
|         | LCS16     | 888                | 2067.37             | 56.70                  | 2010.67                | 8                     | 0.40        | 0.17          | 0.78          |
| year 1  | LCS12     | 866                | 788.73              | 26.57                  | 762.15                 | 4                     | 0.52        | 0.14          | 1.34          |
|         | LCS16     | 888                | 807.88              | 28.43                  | 779.45                 | 1                     | 0.13        | 0.00          | 0.71          |
| year 2  | LCS12     | 727                | 664.69              | 17.31                  | 647.38                 | 1                     | 0.15        | 0.00          | 0.86          |
|         | LCS16     | 745                | 681.67              | 14.82                  | 666.84                 | 4                     | 0.60        | 0.16          | 1.54          |
| year 3  | LCS12     | 606                | 555.18              | 20.30                  | 534.87                 | 1                     | 0.19        | 0.00          | 1.04          |
|         | LCS16     | 627                | 570.82              | 12.94                  | 557.88                 | 3                     | 0.54        | 0.11          | 1.57          |
| 2 years | LCS12     | 866                | 1453.42             | 43.88                  | 1409.54                | 5                     | 0.35        | 0.12          | 0.83          |
|         | LCS16     | 888                | 1489.55             | 43.26                  | 1446.29                | 5                     | 0.35        | 0.11          | 0.81          |
| 3 years | LCS12     | 866                | 2008.59             | 64.18                  | 1944.41                | 6                     | 0.31        | 0.11          | 0.67          |
|         | LCS16     | 888                | 2060.37             | 56.19                  | 2004.17                | 8                     | 0.40        | 0.17          | 0.79          |

Note: WY = women years, 1 WY equals to 365 days, CIL = confidence interval limit

Global Biostatistics: /by-sasp/patdb/projects/de04209/310442/stat/prod\_interim03/pgms/t-eff-pi-age.sas sgrpp 27OCT2011 12:52

Table 14.2.1 / 2: Contraceptive efficacy by treatment and age-group (FAS) (cont.)

Pearl Index: adj.

Age group: age &lt;= 25

| Time    | TREATMENT | Number of subjects | Total exposure [WY] | Excluded exposure [WY] | Relevant exposure [WY] | Number of pregnancies | Pearl index | Lower 95% CIL | Upper 95% CIL |
|---------|-----------|--------------------|---------------------|------------------------|------------------------|-----------------------|-------------|---------------|---------------|
| overall | LCS12     | 566                | 1189.59             | 84.86                  | 1104.73                | 4                     | 0.36        | 0.10          | 0.93          |
|         | LCS16     | 564                | 1269.51             | 71.85                  | 1197.66                | 2                     | 0.17        | 0.02          | 0.60          |
| year 1  | LCS12     | 566                | 486.04              | 35.47                  | 450.56                 | 1                     | 0.22        | 0.01          | 1.24          |
|         | LCS16     | 564                | 502.10              | 34.24                  | 467.86                 | 1                     | 0.21        | 0.01          | 1.19          |
| year 2  | LCS12     | 432                | 388.32              | 23.35                  | 364.97                 | 2                     | 0.55        | 0.07          | 1.98          |
|         | LCS16     | 458                | 417.98              | 22.70                  | 395.28                 | 0                     | 0.00        | 0.00          | 0.93          |
| year 3  | LCS12     | 349                | 311.81              | 24.72                  | 287.09                 | 1                     | 0.35        | 0.01          | 1.94          |
|         | LCS16     | 378                | 344.44              | 14.13                  | 330.32                 | 1                     | 0.30        | 0.01          | 1.69          |
| 2 years | LCS12     | 566                | 874.36              | 58.83                  | 815.53                 | 3                     | 0.37        | 0.08          | 1.08          |
|         | LCS16     | 564                | 920.07              | 56.93                  | 863.14                 | 1                     | 0.12        | 0.00          | 0.65          |
| 3 years | LCS12     | 566                | 1186.17             | 83.55                  | 1102.62                | 4                     | 0.36        | 0.10          | 0.93          |
|         | LCS16     | 564                | 1264.52             | 71.06                  | 1193.45                | 2                     | 0.17        | 0.02          | 0.61          |

Note: WY = women years, 1 WY equals to 365 days, CIL = confidence interval limit

Global Biostatistics: /by-sasp/patdb/projects/de04209/310442/stat/prod\_interim03/pgms/t-eff-pi-age.sas sgrpp 27OCT2011 12:52

Table 14.2.1 / 2: Contraceptive efficacy by treatment and age-group (FAS) (cont.)

Pearl Index: adj.

Age group: 25 < age <= 35

| Time    | TREATMENT | Number of subjects | Total exposure [WY] | Excluded exposure [WY] | Relevant exposure [WY] | Number of pregnancies | Pearl index | Lower 95% CIL | Upper 95% CIL |
|---------|-----------|--------------------|---------------------|------------------------|------------------------|-----------------------|-------------|---------------|---------------|
| overall | LCS12     | 866                | 2001.96             | 65.75                  | 1936.22                | 6                     | 0.31        | 0.11          | 0.67          |
|         | LCS16     | 888                | 2050.73             | 55.92                  | 1994.80                | 8                     | 0.40        | 0.17          | 0.79          |
| year 1  | LCS12     | 866                | 784.38              | 26.12                  | 758.26                 | 4                     | 0.53        | 0.14          | 1.35          |
|         | LCS16     | 888                | 798.82              | 28.05                  | 770.76                 | 1                     | 0.13        | 0.00          | 0.72          |
| year 2  | LCS12     | 723                | 660.32              | 16.73                  | 643.59                 | 1                     | 0.16        | 0.00          | 0.87          |
|         | LCS16     | 740                | 677.65              | 14.57                  | 663.08                 | 4                     | 0.60        | 0.16          | 1.54          |
| year 3  | LCS12     | 604                | 551.63              | 20.04                  | 531.59                 | 1                     | 0.19        | 0.00          | 1.05          |
|         | LCS16     | 622                | 567.25              | 12.79                  | 554.47                 | 3                     | 0.54        | 0.11          | 1.58          |
| 2 years | LCS12     | 866                | 1444.70             | 42.85                  | 1401.85                | 5                     | 0.36        | 0.12          | 0.83          |
|         | LCS16     | 888                | 1476.47             | 42.62                  | 1433.85                | 5                     | 0.35        | 0.11          | 0.81          |
| 3 years | LCS12     | 866                | 1996.33             | 62.88                  | 1933.44                | 6                     | 0.31        | 0.11          | 0.68          |
|         | LCS16     | 888                | 2043.73             | 55.41                  | 1988.31                | 8                     | 0.40        | 0.17          | 0.79          |

Note: WY = women years, 1 WY equals to 365 days, CIL = confidence interval limit

Global Biostatistics: /by-sasp/patdb/projects/de04209/310442/stat/prod\_interim03/pgms/t-eff-pi-age.sas sgrpp 27OCT2011 12:52

End of table

**Table 14.2.1 / 3: Contraceptive efficacy by treatment and parity (FAS)**

Pearl Index: unadj.

Parity: 0 births

| Time    | TREATMENT | Number of subjects | Total exposure [WY] | Excluded exposure [WY] | Relevant exposure [WY] | Number of pregnancies | Pearl index | Lower 95% CIL | Upper 95% CIL |
|---------|-----------|--------------------|---------------------|------------------------|------------------------|-----------------------|-------------|---------------|---------------|
| overall | LCS12     | 556                | 1211.65             | 99.27                  | 1112.38                | 4                     | 0.36        | 0.10          | 0.92          |
|         | LCS16     | 574                | 1283.30             | 74.15                  | 1209.16                | 3                     | 0.25        | 0.05          | 0.73          |
| year 1  | LCS12     | 556                | 489.40              | 42.52                  | 446.88                 | 2                     | 0.45        | 0.05          | 1.62          |
|         | LCS16     | 574                | 508.51              | 35.12                  | 473.39                 | 0                     | 0.00        | 0.00          | 0.78          |
| year 2  | LCS12     | 438                | 395.52              | 28.17                  | 367.34                 | 1                     | 0.27        | 0.01          | 1.52          |
|         | LCS16     | 459                | 420.01              | 21.54                  | 398.47                 | 1                     | 0.25        | 0.01          | 1.40          |
| year 3  | LCS12     | 354                | 323.63              | 27.22                  | 296.41                 | 1                     | 0.34        | 0.01          | 1.88          |
|         | LCS16     | 380                | 350.26              | 16.78                  | 333.48                 | 2                     | 0.60        | 0.07          | 2.17          |
| 2 years | LCS12     | 556                | 884.92              | 70.69                  | 814.22                 | 3                     | 0.37        | 0.08          | 1.08          |
|         | LCS16     | 574                | 928.52              | 56.66                  | 871.86                 | 1                     | 0.11        | 0.00          | 0.64          |
| 3 years | LCS12     | 556                | 1208.55             | 97.92                  | 1110.63                | 4                     | 0.36        | 0.10          | 0.92          |
|         | LCS16     | 574                | 1278.78             | 73.44                  | 1205.33                | 3                     | 0.25        | 0.05          | 0.73          |

Note: WY = women years, 1 WY equals to 365 days, CIL = confidence interval limit

Global Biostatistics: /by-sasp/patdb/projects/de04209/310442/stat/prod\_interim03/pgms/t-eff-pi-parity.sas sgrpp 27OCT2011 12:52

Table 14.2.1 / 3: Contraceptive efficacy by treatment and parity (FAS) (cont.)

 Pearl Index: unadj.  
 Parity: 1 birth or more

| Time    | TREATMENT | Number of subjects | Total exposure [WY] | Excluded exposure [WY] | Relevant exposure [WY] | Number of pregnancies | Pearl index | Lower 95% CIL | Upper 95% CIL |
|---------|-----------|--------------------|---------------------|------------------------|------------------------|-----------------------|-------------|---------------|---------------|
| overall | LCS12     | 876                | 2005.35             | 54.04                  | 1951.32                | 6                     | 0.31        | 0.11          | 0.67          |
|         | LCS16     | 878                | 2068.68             | 55.78                  | 2012.91                | 7                     | 0.35        | 0.14          | 0.72          |
| year 1  | LCS12     | 876                | 790.82              | 19.92                  | 770.90                 | 3                     | 0.39        | 0.08          | 1.14          |
|         | LCS16     | 878                | 807.86              | 28.47                  | 779.38                 | 2                     | 0.26        | 0.03          | 0.93          |
| year 2  | LCS12     | 724                | 661.47              | 13.14                  | 648.33                 | 2                     | 0.31        | 0.04          | 1.11          |
|         | LCS16     | 747                | 685.32              | 16.29                  | 669.03                 | 3                     | 0.45        | 0.09          | 1.31          |
| year 3  | LCS12     | 606                | 546.79              | 18.03                  | 528.76                 | 1                     | 0.19        | 0.00          | 1.05          |
|         | LCS16     | 630                | 568.04              | 10.42                  | 557.62                 | 2                     | 0.36        | 0.04          | 1.30          |
| 2 years | LCS12     | 876                | 1452.29             | 33.06                  | 1419.23                | 5                     | 0.35        | 0.11          | 0.82          |
|         | LCS16     | 878                | 1493.17             | 44.76                  | 1448.41                | 5                     | 0.35        | 0.11          | 0.81          |
| 3 years | LCS12     | 876                | 1999.07             | 51.08                  | 1947.99                | 6                     | 0.31        | 0.11          | 0.67          |
|         | LCS16     | 878                | 2061.21             | 55.19                  | 2006.03                | 7                     | 0.35        | 0.14          | 0.72          |

Note: WY = women years, 1 WY equals to 365 days, CIL = confidence interval limit

Global Biostatistics: /by-sasp/patdb/projects/de04209/310442/stat/prod\_interim03/pgms/t-eff-pi-parity.sas sgrpp 27OCT2011 12:52



Table 14.2.1 / 3: Contraceptive efficacy by treatment and parity (FAS) (cont.)

Pearl Index: adj.

Parity: 0 births

| Time    | TREATMENT | Number of subjects | Total exposure [WY] | Excluded exposure [WY] | Relevant exposure [WY] | Number of pregnancies | Pearl index | Lower 95% CIL | Upper 95% CIL |
|---------|-----------|--------------------|---------------------|------------------------|------------------------|-----------------------|-------------|---------------|---------------|
| overall | LCS12     | 556                | 1200.91             | 97.98                  | 1102.93                | 4                     | 0.36        | 0.10          | 0.93          |
|         | LCS16     | 574                | 1271.13             | 72.95                  | 1198.18                | 3                     | 0.25        | 0.05          | 0.73          |
| year 1  | LCS12     | 556                | 485.87              | 42.09                  | 443.78                 | 2                     | 0.45        | 0.05          | 1.63          |
|         | LCS16     | 574                | 502.21              | 34.22                  | 467.99                 | 0                     | 0.00        | 0.00          | 0.79          |
| year 2  | LCS12     | 436                | 391.53              | 27.55                  | 363.99                 | 1                     | 0.27        | 0.01          | 1.53          |
|         | LCS16     | 456                | 416.31              | 21.37                  | 394.93                 | 1                     | 0.25        | 0.01          | 1.41          |
| year 3  | LCS12     | 351                | 320.55              | 27.04                  | 293.51                 | 1                     | 0.34        | 0.01          | 1.90          |
|         | LCS16     | 376                | 348.08              | 16.65                  | 331.44                 | 2                     | 0.60        | 0.07          | 2.18          |
| 2 years | LCS12     | 556                | 877.41              | 69.64                  | 807.77                 | 3                     | 0.37        | 0.08          | 1.09          |
|         | LCS16     | 574                | 918.52              | 55.60                  | 862.92                 | 1                     | 0.12        | 0.00          | 0.65          |
| 3 years | LCS12     | 556                | 1197.95             | 96.68                  | 1101.28                | 4                     | 0.36        | 0.10          | 0.93          |
|         | LCS16     | 574                | 1266.60             | 72.24                  | 1194.36                | 3                     | 0.25        | 0.05          | 0.73          |

Note: WY = women years, 1 WY equals to 365 days, CIL = confidence interval limit

Global Biostatistics: /by-sasp/patdb/projects/de04209/310442/stat/prod\_interim03/pgms/t-eff-pi-parity.sas sgrpp 27OCT2011 12:52

Table 14.2.1 / 3: Contraceptive efficacy by treatment and parity (FAS) (cont.)

Pearl Index: adj.

Parity: 1 birth or more

| Time    | TREATMENT | Number of subjects | Total exposure [WY] | Excluded exposure [WY] | Relevant exposure [WY] | Number of pregnancies | Pearl index | Lower 95% CIL | Upper 95% CIL |
|---------|-----------|--------------------|---------------------|------------------------|------------------------|-----------------------|-------------|---------------|---------------|
| overall | LCS12     | 876                | 1990.64             | 52.63                  | 1938.01                | 6                     | 0.31        | 0.11          | 0.67          |
|         | LCS16     | 878                | 2049.11             | 54.82                  | 1994.29                | 7                     | 0.35        | 0.14          | 0.72          |
| year 1  | LCS12     | 876                | 784.55              | 19.50                  | 765.04                 | 3                     | 0.39        | 0.08          | 1.15          |
|         | LCS16     | 878                | 798.70              | 28.07                  | 770.64                 | 2                     | 0.26        | 0.03          | 0.94          |
| year 2  | LCS12     | 719                | 657.10              | 12.53                  | 644.57                 | 2                     | 0.31        | 0.04          | 1.12          |
|         | LCS16     | 742                | 679.32              | 15.90                  | 663.43                 | 3                     | 0.45        | 0.09          | 1.32          |
| year 3  | LCS12     | 602                | 542.89              | 17.72                  | 525.18                 | 1                     | 0.19        | 0.00          | 1.06          |
|         | LCS16     | 624                | 563.61              | 10.27                  | 553.35                 | 2                     | 0.36        | 0.04          | 1.31          |
| 2 years | LCS12     | 876                | 1441.65             | 32.04                  | 1409.61                | 5                     | 0.35        | 0.12          | 0.83          |
|         | LCS16     | 878                | 1478.03             | 43.96                  | 1434.07                | 5                     | 0.35        | 0.11          | 0.81          |
| 3 years | LCS12     | 876                | 1984.54             | 49.75                  | 1934.79                | 6                     | 0.31        | 0.11          | 0.67          |
|         | LCS16     | 878                | 2041.64             | 54.23                  | 1987.41                | 7                     | 0.35        | 0.14          | 0.73          |

Note: WY = women years, 1 WY equals to 365 days, CIL = confidence interval limit

Global Biostatistics: /by-sasp/patdb/projects/de04209/310442/stat/prod\_interim03/pgms/t-eff-pi-parity.sas sgrpp 27OCT2011 12:52

End of table

**Table 14.2.1 / 4: Contraceptive efficacy by treatment and BMI-group (FAS)**

Pearl Index: unadj.  
BMI group: missing

| Time    | TREATMENT | Number of subjects | Total exposure [WY] | Excluded exposure [WY] | Relevant exposure [WY] | Number of pregnancies | Pearl index | Lower 95% CIL | Upper 95% CIL |
|---------|-----------|--------------------|---------------------|------------------------|------------------------|-----------------------|-------------|---------------|---------------|
| overall | LCS12     | 1                  | 2.07                | 0.10                   | 1.96                   | 0                     | 0.00        | 0.00          | 188.05        |
|         | LCS16     | 4                  | 8.15                | 0.02                   | 8.13                   | 0                     | 0.00        | 0.00          | 45.37         |
| year 1  | LCS12     | 1                  | 1.00                | 0.08                   | 0.92                   | 0                     | 0.00        | 0.00          | 403.13        |
|         | LCS16     | 4                  | 3.57                | 0.02                   | 3.55                   | 0                     | 0.00        | 0.00          | 103.89        |
| year 2  | LCS12     | 1                  | 1.00                | 0.00                   | 1.00                   | 0                     | 0.00        | 0.00          | 368.89        |
|         | LCS16     | 3                  | 2.59                | 0.00                   | 2.59                   | 0                     | 0.00        | 0.00          | 142.18        |
| year 3  | LCS12     | 1                  | 0.07                | 0.02                   | 0.05                   | 0                     | 0.00        | 0.00          | 7920.24       |
|         | LCS16     | 2                  | 1.99                | 0.00                   | 1.99                   | 0                     | 0.00        | 0.00          | 185.72        |
| 2 years | LCS12     | 1                  | 2.00                | 0.08                   | 1.92                   | 0                     | 0.00        | 0.00          | 192.62        |
|         | LCS16     | 4                  | 6.16                | 0.02                   | 6.15                   | 0                     | 0.00        | 0.00          | 60.03         |
| 3 years | LCS12     | 1                  | 2.07                | 0.10                   | 1.96                   | 0                     | 0.00        | 0.00          | 188.05        |
|         | LCS16     | 4                  | 8.15                | 0.02                   | 8.13                   | 0                     | 0.00        | 0.00          | 45.37         |

Note: WY = women years, 1 WY equals to 365 days, CIL = confidence interval limit

Global Biostatistics: /by-sasp/patdb/projects/de04209/310442/stat/prod\_interim03/pgms/t-eff-pi-bmi.sas sgrpp 27OCT2011 12:52

Table 14.2.1 / 4: Contraceptive efficacy by treatment and BMI-group (FAS) (cont.)

Pearl Index: unadj.  
BMI group: < 30 kg/m2

| Time    | TREATMENT | Number of subjects | Total exposure [WY] | Excluded exposure [WY] | Relevant exposure [WY] | Number of pregnancies | Pearl index | Lower 95% CIL | Upper 95% CIL |
|---------|-----------|--------------------|---------------------|------------------------|------------------------|-----------------------|-------------|---------------|---------------|
| overall | LCS12     | 1187               | 2672.43             | 121.88                 | 2550.55                | 9                     | 0.35        | 0.16          | 0.67          |
|         | LCS16     | 1198               | 2781.56             | 108.49                 | 2673.07                | 6                     | 0.22        | 0.08          | 0.49          |
| year 1  | LCS12     | 1187               | 1059.53             | 49.80                  | 1009.73                | 4                     | 0.40        | 0.11          | 1.01          |
|         | LCS16     | 1198               | 1090.09             | 51.99                  | 1038.10                | 1                     | 0.10        | 0.00          | 0.54          |
| year 2  | LCS12     | 960                | 879.05              | 30.98                  | 848.07                 | 3                     | 0.35        | 0.07          | 1.03          |
|         | LCS16     | 1000               | 917.49              | 31.77                  | 885.72                 | 2                     | 0.23        | 0.03          | 0.82          |
| year 3  | LCS12     | 801                | 727.47              | 37.96                  | 689.51                 | 2                     | 0.29        | 0.04          | 1.05          |
|         | LCS16     | 840                | 764.71              | 23.71                  | 741.01                 | 3                     | 0.40        | 0.08          | 1.18          |
| 2 years | LCS12     | 1187               | 1938.58             | 80.77                  | 1857.81                | 7                     | 0.38        | 0.15          | 0.78          |
|         | LCS16     | 1198               | 2007.58             | 83.76                  | 1923.81                | 3                     | 0.16        | 0.03          | 0.46          |
| 3 years | LCS12     | 1187               | 2666.05             | 118.73                 | 2547.32                | 9                     | 0.35        | 0.16          | 0.67          |
|         | LCS16     | 1198               | 2772.29             | 107.47                 | 2664.82                | 6                     | 0.23        | 0.08          | 0.49          |

Note: WY = women years, 1 WY equals to 365 days, CIL = confidence interval limit

Global Biostatistics: /by-sasp/patdb/projects/de04209/310442/stat/prod\_interim03/pgms/t-eff-pi-bmi.sas sgrpp 27OCT2011 12:52

Table 14.2.1 / 4: Contraceptive efficacy by treatment and BMI-group (FAS) (cont.)

Pearl Index: unadj.

 BMI group:  $\geq 30$  kg/m<sup>2</sup>

| Time    | TREATMENT | Number of subjects | Total exposure [WY] | Excluded exposure [WY] | Relevant exposure [WY] | Number of pregnancies | Pearl index | Lower 95% CIL | Upper 95% CIL |
|---------|-----------|--------------------|---------------------|------------------------|------------------------|-----------------------|-------------|---------------|---------------|
| overall | LCS12     | 244                | 542.51              | 31.32                  | 511.19                 | 1                     | 0.20        | 0.00          | 1.09          |
|         | LCS16     | 250                | 562.28              | 21.42                  | 540.87                 | 4                     | 0.74        | 0.20          | 1.89          |
| year 1  | LCS12     | 244                | 219.69              | 12.56                  | 207.13                 | 1                     | 0.48        | 0.01          | 2.69          |
|         | LCS16     | 250                | 222.71              | 11.58                  | 211.13                 | 1                     | 0.47        | 0.01          | 2.64          |
| year 2  | LCS12     | 201                | 176.93              | 10.33                  | 166.60                 | 0                     | 0.00        | 0.00          | 2.21          |
|         | LCS16     | 203                | 185.24              | 6.06                   | 179.18                 | 2                     | 1.12        | 0.14          | 4.03          |
| year 3  | LCS12     | 158                | 142.88              | 7.27                   | 135.61                 | 0                     | 0.00        | 0.00          | 2.72          |
|         | LCS16     | 168                | 151.60              | 3.50                   | 148.10                 | 1                     | 0.68        | 0.02          | 3.76          |
| 2 years | LCS12     | 244                | 396.62              | 22.89                  | 373.73                 | 1                     | 0.27        | 0.01          | 1.49          |
|         | LCS16     | 250                | 407.95              | 17.64                  | 390.31                 | 3                     | 0.77        | 0.16          | 2.25          |
| 3 years | LCS12     | 244                | 539.51              | 30.16                  | 509.34                 | 1                     | 0.20        | 0.00          | 1.09          |
|         | LCS16     | 250                | 559.55              | 21.14                  | 538.41                 | 4                     | 0.74        | 0.20          | 1.90          |

Note: WY = women years, 1 WY equals to 365 days, CIL = confidence interval limit

Global Biostatistics: /by-sasp/patdb/projects/de04209/310442/stat/prod\_interim03/pgms/t-eff-pi-bmi.sas sgrpp 27OCT2011 12:52

Table 14.2.1 / 4: Contraceptive efficacy by treatment and BMI-group (FAS) (cont.)

 Pearl Index: adj.  
 BMI group: missing

| Time    | TREATMENT | Number of subjects | Total exposure [WY] | Excluded exposure [WY] | Relevant exposure [WY] | Number of pregnancies | Pearl index | Lower 95% CIL | Upper 95% CIL |
|---------|-----------|--------------------|---------------------|------------------------|------------------------|-----------------------|-------------|---------------|---------------|
| overall | LCS12     | 1                  | 2.07                | 0.10                   | 1.96                   | 0                     | 0.00        | 0.00          | 188.05        |
|         | LCS16     | 4                  | 8.15                | 0.02                   | 8.13                   | 0                     | 0.00        | 0.00          | 45.37         |
| year 1  | LCS12     | 1                  | 1.00                | 0.08                   | 0.92                   | 0                     | 0.00        | 0.00          | 403.13        |
|         | LCS16     | 4                  | 3.57                | 0.02                   | 3.55                   | 0                     | 0.00        | 0.00          | 103.89        |
| year 2  | LCS12     | 1                  | 1.00                | 0.00                   | 1.00                   | 0                     | 0.00        | 0.00          | 368.89        |
|         | LCS16     | 3                  | 2.59                | 0.00                   | 2.59                   | 0                     | 0.00        | 0.00          | 142.18        |
| year 3  | LCS12     | 1                  | 0.07                | 0.02                   | 0.05                   | 0                     | 0.00        | 0.00          | 7920.24       |
|         | LCS16     | 2                  | 1.99                | 0.00                   | 1.99                   | 0                     | 0.00        | 0.00          | 185.72        |
| 2 years | LCS12     | 1                  | 2.00                | 0.08                   | 1.92                   | 0                     | 0.00        | 0.00          | 192.62        |
|         | LCS16     | 4                  | 6.16                | 0.02                   | 6.15                   | 0                     | 0.00        | 0.00          | 60.03         |
| 3 years | LCS12     | 1                  | 2.07                | 0.10                   | 1.96                   | 0                     | 0.00        | 0.00          | 188.05        |
|         | LCS16     | 4                  | 8.15                | 0.02                   | 8.13                   | 0                     | 0.00        | 0.00          | 45.37         |

Note: WY = women years, 1 WY equals to 365 days, CIL = confidence interval limit

Global Biostatistics: /by-sasp/patdb/projects/de04209/310442/stat/prod\_interim03/pgms/t-eff-pi-bmi.sas sgrpp 27OCT2011 12:52

Table 14.2.1 / 4: Contraceptive efficacy by treatment and BMI-group (FAS) (cont.)

Pearl Index: adj.

BMI group: < 30 kg/m2

| Time    | TREATMENT | Number of subjects | Total exposure [WY] | Excluded exposure [WY] | Relevant exposure [WY] | Number of pregnancies | Pearl index | Lower 95% CIL | Upper 95% CIL |
|---------|-----------|--------------------|---------------------|------------------------|------------------------|-----------------------|-------------|---------------|---------------|
| overall | LCS12     | 1187               | 2650.97             | 119.51                 | 2531.46                | 9                     | 0.36        | 0.16          | 0.67          |
|         | LCS16     | 1198               | 2757.19             | 106.86                 | 2650.33                | 6                     | 0.23        | 0.08          | 0.49          |
| year 1  | LCS12     | 1187               | 1052.56             | 49.17                  | 1003.39                | 4                     | 0.40        | 0.11          | 1.02          |
|         | LCS16     | 1198               | 1079.20             | 51.15                  | 1028.05                | 1                     | 0.10        | 0.00          | 0.54          |
| year 2  | LCS12     | 955                | 870.88              | 29.78                  | 841.09                 | 3                     | 0.36        | 0.07          | 1.04          |
|         | LCS16     | 994                | 909.24              | 31.26                  | 877.98                 | 2                     | 0.23        | 0.03          | 0.82          |
| year 3  | LCS12     | 794                | 721.39              | 37.50                  | 683.89                 | 2                     | 0.29        | 0.04          | 1.06          |
|         | LCS16     | 831                | 759.48              | 23.44                  | 736.05                 | 3                     | 0.41        | 0.08          | 1.19          |
| 2 years | LCS12     | 1187               | 1923.44             | 78.95                  | 1844.48                | 7                     | 0.38        | 0.15          | 0.78          |
|         | LCS16     | 1198               | 1988.44             | 82.41                  | 1906.03                | 3                     | 0.16        | 0.03          | 0.46          |
| 3 years | LCS12     | 1187               | 2644.82             | 116.45                 | 2528.38                | 9                     | 0.36        | 0.16          | 0.68          |
|         | LCS16     | 1198               | 2747.92             | 105.84                 | 2642.08                | 6                     | 0.23        | 0.08          | 0.49          |

Note: WY = women years, 1 WY equals to 365 days, CIL = confidence interval limit

Global Biostatistics: /by-sasp/patdb/projects/de04209/310442/stat/prod\_interim03/pgms/t-eff-pi-bmi.sas sgrpp 27OCT2011 12:52

Table 14.2.1 / 4: Contraceptive efficacy by treatment and BMI-group (FAS) (cont.)

Pearl Index: adj.

 BMI group:  $\geq 30$  kg/m<sup>2</sup>

| Time    | TREATMENT | Number of subjects | Total exposure [WY] | Excluded exposure [WY] | Relevant exposure [WY] | Number of pregnancies | Pearl index | Lower 95% CIL | Upper 95% CIL |
|---------|-----------|--------------------|---------------------|------------------------|------------------------|-----------------------|-------------|---------------|---------------|
| overall | LCS12     | 244                | 538.51              | 30.99                  | 507.52                 | 1                     | 0.20        | 0.00          | 1.10          |
|         | LCS16     | 250                | 554.90              | 20.89                  | 534.01                 | 4                     | 0.75        | 0.20          | 1.92          |
| year 1  | LCS12     | 244                | 216.86              | 12.34                  | 204.52                 | 1                     | 0.49        | 0.01          | 2.72          |
|         | LCS16     | 250                | 218.15              | 11.13                  | 207.02                 | 1                     | 0.48        | 0.01          | 2.69          |
| year 2  | LCS12     | 199                | 176.76              | 10.30                  | 166.47                 | 0                     | 0.00        | 0.00          | 2.22          |
|         | LCS16     | 201                | 183.80              | 6.01                   | 177.79                 | 2                     | 1.12        | 0.14          | 4.06          |
| year 3  | LCS12     | 158                | 141.98              | 7.24                   | 134.74                 | 0                     | 0.00        | 0.00          | 2.74          |
|         | LCS16     | 167                | 150.23              | 3.48                   | 146.75                 | 1                     | 0.68        | 0.02          | 3.80          |
| 2 years | LCS12     | 244                | 393.62              | 22.64                  | 370.99                 | 1                     | 0.27        | 0.01          | 1.50          |
|         | LCS16     | 250                | 401.95              | 17.13                  | 384.81                 | 3                     | 0.78        | 0.16          | 2.28          |
| 3 years | LCS12     | 244                | 535.61              | 29.88                  | 505.73                 | 1                     | 0.20        | 0.01          | 1.10          |
|         | LCS16     | 250                | 552.17              | 20.61                  | 531.56                 | 4                     | 0.75        | 0.21          | 1.93          |

Note: WY = women years, 1 WY equals to 365 days, CIL = confidence interval limit

Global Biostatistics: /by-sasp/patdb/projects/de04209/310442/stat/prod\_interim03/pgms/t-eff-pi-bmi.sas sgrpp 27OCT2011 12:52

End of table



**Table 14.2.1 / 5: Listing with details on pregnancies (FAS)**

| TREATMENT | Subject number       | Age/BMI(kg/m2) /parity      | Pregnancy implantation | Pregnancy implantation, text                          | IUS insertion date | Last day on study medication (imputed) | Conception date / Conception date (imputed) |
|-----------|----------------------|-----------------------------|------------------------|-------------------------------------------------------|--------------------|----------------------------------------|---------------------------------------------|
| LCS12     | 120329               | 23 / 22.5 / 1 birth or more | .                      |                                                       | 18APR2008          | 05SEP2010                              | 07AUG2010 / 07AUG10                         |
|           | 120419               | 30 / 21.8 / 1 birth or more | ectopic                |                                                       | 14MAY2008          | 24FEB2009                              | 04JAN2009 / 04JAN09                         |
|           | 140202               | 27 / 29 / 0 births          | other                  | TRANSVAGINAL ULTRASOUND INCONCLUSIVE FOR IMPLANTATION | 20FEB2008          | 03SEP2010                              | 01AUG2010 / 01AUG10                         |
|           | 141008               | 26 / 21.9 / 1 birth or more | .                      |                                                       | 27FEB2008          | 29APR2008                              | 07APR2008 / 07APR08                         |
|           | 160743               | 18 / 19.8 / 0 births        | ectopic                |                                                       | 18JAN2008          | 27APR2008                              | APR2008 / 01APR08                           |
|           | 190636               | 23 / 26.2 / 1 birth or more | .                      |                                                       | 19MAY2008          | 24SEP2009                              | 23JUN2009 / 23JUN09                         |
|           | 210519               | 34 / 23.4 / 1 birth or more | .                      |                                                       | 12MAR2008          | 14DEC2009                              | 29OCT2009 / 29OCT09                         |
|           | 230303               | 20 / 22.5 / 0 births        | ectopic                |                                                       | 14JAN2008          | 16JUN2009                              | MAY2009 / 01MAY09                           |
|           | 245003               | 27 / 21 / 1 birth or more   | .                      |                                                       | 07JAN2008          | 12NOV2008                              | 03OCT2008 / 03OCT08                         |
|           | 245932               | 27 / 36.7 / 0 births        | .                      |                                                       | 05MAY2008          | 23FEB2009                              | JAN2009 / 01JAN09                           |
| LCS16     | 160423               | 26 / 35 / 1 birth or more   | ectopic                |                                                       | 18DEC2007          | 09OCT2008                              | 26SEP2008 / 26SEP08                         |
|           | 160927               | 33 / 19.9 / 1 birth or more | other                  | BLIGHTED OVUM                                         | 22OCT2007          | 10FEB2010                              | 10DEC2009 / 10DEC09                         |
|           | 180112               | 33 / 33.8 / 1 birth or more | .                      |                                                       | 04DEC2007          | 04JUN2009                              | 02MAY2009 / 02MAY09                         |
|           | 180317               | 33 / 31.5 / 1 birth or more | ectopic                |                                                       | 22NOV2007          | 03JAN2009                              | 07DEC2008 / 07DEC08                         |
|           | 200609               | 32 / 19.9 / 1 birth or more | ectopic                |                                                       | 03JAN2008          | 21DEC2009                              | OCT2009 / 01OCT09                           |
|           | 242321               | 31 / 21.1 / 0 births        | ectopic                |                                                       | 21APR2008          | 19JUL2010                              | 2010 / 01JAN10                              |
|           | 243228               | 23 / 27.6 / 1 birth or more | ectopic                |                                                       | 20MAY2008          | 06MAY2009                              | 28MAR2009 / 28MAR09                         |
|           | 243703               | 26 / 42.9 / 1 birth or more | .                      |                                                       | 13DEC2007          | 10FEB2010                              | 08FEB2010 / 08FEB10                         |
| 243932    | 29 / 21.3 / 0 births | ectopic                     |                        | 21FEB2008                                             | 08MAR2011          | FEB2011 / 01FEB11                      |                                             |

**Table 14.2.1 / 5: Listing with details on pregnancies (FAS)**

| TREATMENT | Subject number | Age/BMI(kg/m2) /parity      | Pregnancy implantation | Pregnancy implantation, text | IUS insertion date | Last day on study medication (imputed) | Conception date / Conception date (imputed) |
|-----------|----------------|-----------------------------|------------------------|------------------------------|--------------------|----------------------------------------|---------------------------------------------|
|           | 244519         | 25 / 26.9 / 0 births        | ectopic                |                              | 10APR2008          | 18JUN2010                              | 08JUN2010 / 08JUN10                         |
|           | 245406         | 26 / 27.2 / 1 birth or more | .                      |                              | 27FEB2008          | 18SEP2008                              | 08OCT2008 / 08OCT08                         |

Global Biostatistics: /by-sasp/patdb/projects/de04209/310442/stat/prod\_interim03/pgms/t-preg1.sas sgrpp 27OCT2011 12:52

Table 14.2.1 / 5: Listing with details on pregnancies (FAS) (cont.)

| TREATMENT | Partial<br>expulsion / total<br>expulsion | Conception<br>relative to<br>insertion<br>[days] | Conception<br>relative to<br>removal/expulsion<br>[days] |
|-----------|-------------------------------------------|--------------------------------------------------|----------------------------------------------------------|
| LCS12     | / 05SEP2010                               | 841                                              | -29                                                      |
|           | /                                         | 235                                              | -51                                                      |
|           | /                                         | 893                                              | -33                                                      |
|           | /                                         | 40                                               | -22                                                      |
|           | /                                         | 74                                               | -26                                                      |
|           | /                                         | 400                                              | -93                                                      |
|           | 14DEC2009 /                               | 596                                              | -46                                                      |
|           | /                                         | 473                                              | -46                                                      |
|           | /                                         | 270                                              | -40                                                      |
|           | 05FEB2009 /                               | 241                                              | -53                                                      |
| LCS16     | /                                         | 283                                              | -13                                                      |
|           | /                                         | 780                                              | -62                                                      |
|           | /                                         | 515                                              | -33                                                      |
|           | /                                         | 381                                              | -27                                                      |
|           | /                                         | 637                                              | -81                                                      |
|           | /                                         | 620                                              | -199                                                     |
|           | /                                         | 312                                              | -39                                                      |
|           | / 2010                                    | 788                                              | -2                                                       |
|           | /                                         | 1076                                             | -35                                                      |
|           | /                                         | 789                                              | -10                                                      |
|           | / 18SEP2008                               | 224                                              | 20                                                       |

Global Biostatistics: /by-  
 sasp/patdb/projects/de04209/310442/stat/prod\_interim03/p  
 gms/t-preg1.sas sgrpp 27OCT2011 12:52  
 End of table

**Table 14.2.1 / 6: Contraceptive efficacy (ectopic pregnancies) by treatment (FAS)**

Pearl Index: unadj.

| Time    | TREATMENT | Number of subjects | Total exposure [WY] | Excluded exposure [WY] | Relevant exposure [WY] | Number of pregnancies | Pearl index | Lower 95% CIL | Upper 95% CIL |
|---------|-----------|--------------------|---------------------|------------------------|------------------------|-----------------------|-------------|---------------|---------------|
| overall | LCS12     | 1432               | 3217.01             | 153.31                 | 3063.70                | 3                     | 0.10        | 0.02          | 0.29          |
|         | LCS16     | 1452               | 3351.99             | 129.92                 | 3222.07                | 7                     | 0.22        | 0.09          | 0.45          |
| year 1  | LCS12     | 1432               | 1280.22             | 62.44                  | 1217.78                | 2                     | 0.16        | 0.02          | 0.59          |
|         | LCS16     | 1452               | 1316.37             | 63.59                  | 1252.78                | 2                     | 0.16        | 0.02          | 0.58          |
| year 2  | LCS12     | 1162               | 1056.98             | 41.31                  | 1015.67                | 1                     | 0.10        | 0.00          | 0.55          |
|         | LCS16     | 1206               | 1105.32             | 37.83                  | 1067.49                | 3                     | 0.28        | 0.06          | 0.82          |
| year 3  | LCS12     | 960                | 870.42              | 45.25                  | 825.17                 | 0                     | 0.00        | 0.00          | 0.45          |
|         | LCS16     | 1010               | 918.30              | 27.21                  | 891.09                 | 2                     | 0.22        | 0.03          | 0.81          |
| 2 years | LCS12     | 1432               | 2337.20             | 103.75                 | 2233.45                | 3                     | 0.13        | 0.03          | 0.39          |
|         | LCS16     | 1452               | 2421.69             | 101.42                 | 2320.27                | 5                     | 0.22        | 0.07          | 0.50          |
| 3 years | LCS12     | 1432               | 3207.62             | 149.00                 | 3058.62                | 3                     | 0.10        | 0.02          | 0.29          |
|         | LCS16     | 1452               | 3339.99             | 128.63                 | 3211.36                | 7                     | 0.22        | 0.09          | 0.45          |

Note: WY = women years, 1 WY equals to 365 days, CIL = confidence interval limit

Global Biostatistics: /by-sasp/patdb/projects/de04209/310442/stat/prod\_interim03/pgms/t-eff-pi-ect-all.sas sgrpp 27OCT2011 12:52

Table 14.2.1 / 6: Contraceptive efficacy (ectopic pregnancies) by treatment (FAS) (cont.)

Pearl Index: adj.

| Time    | TREATMENT | Number of subjects | Total exposure [WY] | Excluded exposure [WY] | Relevant exposure [WY] | Number of pregnancies | Pearl index | Lower 95% CIL | Upper 95% CIL |
|---------|-----------|--------------------|---------------------|------------------------|------------------------|-----------------------|-------------|---------------|---------------|
| overall | LCS12     | 1432               | 3191.55             | 150.61                 | 3040.95                | 3                     | 0.10        | 0.02          | 0.29          |
|         | LCS16     | 1452               | 3320.24             | 127.77                 | 3192.47                | 7                     | 0.22        | 0.09          | 0.45          |
| year 1  | LCS12     | 1432               | 1270.42             | 61.59                  | 1208.82                | 2                     | 0.17        | 0.02          | 0.60          |
|         | LCS16     | 1452               | 1300.92             | 62.29                  | 1238.62                | 2                     | 0.16        | 0.02          | 0.58          |
| year 2  | LCS12     | 1155               | 1048.64             | 40.08                  | 1008.56                | 1                     | 0.10        | 0.00          | 0.55          |
|         | LCS16     | 1198               | 1095.63             | 37.27                  | 1058.36                | 3                     | 0.28        | 0.06          | 0.83          |
| year 3  | LCS12     | 953                | 863.44              | 44.76                  | 818.68                 | 0                     | 0.00        | 0.00          | 0.45          |
|         | LCS16     | 1000               | 911.70              | 26.92                  | 884.78                 | 2                     | 0.23        | 0.03          | 0.82          |
| 2 years | LCS12     | 1432               | 2319.06             | 101.67                 | 2217.38                | 3                     | 0.14        | 0.03          | 0.40          |
|         | LCS16     | 1452               | 2396.55             | 99.56                  | 2296.99                | 5                     | 0.22        | 0.07          | 0.51          |
| 3 years | LCS12     | 1432               | 3182.50             | 146.43                 | 3036.07                | 3                     | 0.10        | 0.02          | 0.29          |
|         | LCS16     | 1452               | 3308.24             | 126.47                 | 3181.77                | 7                     | 0.22        | 0.09          | 0.45          |

Note: WY = women years, 1 WY equals to 365 days, CIL = confidence interval limit

Global Biostatistics: /by-sasp/patdb/projects/de04209/310442/stat/prod\_interim03/pgms/t-eff-pi-ect-all.sas sgrpp 27OCT2011 12:52

End of table

**Table 14.2.1 / 7: Contraceptive efficacy (ectopic pregnancies) by treatment and age-group (FAS)**

Pearl Index: unadj.  
Age group: age <= 25

| Time    | TREATMENT | Number of subjects | Total exposure [WY] | Excluded exposure [WY] | Relevant exposure [WY] | Number of pregnancies | Pearl index | Lower 95% CIL | Upper 95% CIL |
|---------|-----------|--------------------|---------------------|------------------------|------------------------|-----------------------|-------------|---------------|---------------|
| overall | LCS12     | 566                | 1202.58             | 86.18                  | 1116.41                | 2                     | 0.18        | 0.02          | 0.65          |
|         | LCS16     | 564                | 1284.62             | 73.22                  | 1211.40                | 2                     | 0.17        | 0.02          | 0.60          |
| year 1  | LCS12     | 566                | 491.49              | 35.87                  | 455.62                 | 1                     | 0.22        | 0.01          | 1.22          |
|         | LCS16     | 564                | 508.48              | 35.16                  | 473.33                 | 1                     | 0.21        | 0.01          | 1.18          |
| year 2  | LCS12     | 435                | 392.29              | 24.00                  | 368.29                 | 1                     | 0.27        | 0.01          | 1.51          |
|         | LCS16     | 461                | 423.65              | 23.01                  | 400.65                 | 0                     | 0.00        | 0.00          | 0.92          |
| year 3  | LCS12     | 354                | 315.24              | 24.95                  | 290.30                 | 0                     | 0.00        | 0.00          | 1.27          |
|         | LCS16     | 383                | 347.48              | 14.27                  | 333.21                 | 1                     | 0.30        | 0.01          | 1.67          |
| 2 years | LCS12     | 566                | 883.78              | 59.87                  | 823.92                 | 2                     | 0.24        | 0.03          | 0.88          |
|         | LCS16     | 564                | 932.14              | 58.16                  | 873.98                 | 1                     | 0.11        | 0.00          | 0.64          |
| 3 years | LCS12     | 566                | 1199.03             | 84.82                  | 1114.21                | 2                     | 0.18        | 0.02          | 0.65          |
|         | LCS16     | 564                | 1279.62             | 72.43                  | 1207.19                | 2                     | 0.17        | 0.02          | 0.60          |

Note: WY = women years, 1 WY equals to 365 days, CIL = confidence interval limit

Global Biostatistics: /by-sasp/patdb/projects/de04209/310442/stat/prod\_interim03/pgms/t-eff-pi-ect-age.sas sgrpp 27OCT2011 12:52

Table 14.2.1 / 7: Contraceptive efficacy (ectopic pregnancies) by treatment and age-group (FAS) (cont.)

Pearl Index: unadj.

Age group: 25 < age <= 35

| Time    | TREATMENT | Number of subjects | Total exposure [WY] | Excluded exposure [WY] | Relevant exposure [WY] | Number of pregnancies | Pearl index | Lower 95% CIL | Upper 95% CIL |
|---------|-----------|--------------------|---------------------|------------------------|------------------------|-----------------------|-------------|---------------|---------------|
| overall | LCS12     | 866                | 2014.42             | 67.13                  | 1947.29                | 1                     | 0.05        | 0.00          | 0.29          |
|         | LCS16     | 888                | 2067.37             | 56.70                  | 2010.67                | 5                     | 0.25        | 0.08          | 0.58          |
| year 1  | LCS12     | 866                | 788.73              | 26.57                  | 762.15                 | 1                     | 0.13        | 0.00          | 0.73          |
|         | LCS16     | 888                | 807.88              | 28.43                  | 779.45                 | 1                     | 0.13        | 0.00          | 0.71          |
| year 2  | LCS12     | 727                | 664.69              | 17.31                  | 647.38                 | 0                     | 0.00        | 0.00          | 0.57          |
|         | LCS16     | 745                | 681.67              | 14.82                  | 666.84                 | 3                     | 0.45        | 0.09          | 1.31          |
| year 3  | LCS12     | 606                | 555.18              | 20.30                  | 534.87                 | 0                     | 0.00        | 0.00          | 0.69          |
|         | LCS16     | 627                | 570.82              | 12.94                  | 557.88                 | 1                     | 0.18        | 0.00          | 1.00          |
| 2 years | LCS12     | 866                | 1453.42             | 43.88                  | 1409.54                | 1                     | 0.07        | 0.00          | 0.40          |
|         | LCS16     | 888                | 1489.55             | 43.26                  | 1446.29                | 4                     | 0.28        | 0.08          | 0.71          |
| 3 years | LCS12     | 866                | 2008.59             | 64.18                  | 1944.41                | 1                     | 0.05        | 0.00          | 0.29          |
|         | LCS16     | 888                | 2060.37             | 56.19                  | 2004.17                | 5                     | 0.25        | 0.08          | 0.58          |

Note: WY = women years, 1 WY equals to 365 days, CIL = confidence interval limit

Global Biostatistics: /by-sasp/patdb/projects/de04209/310442/stat/prod\_interim03/pgms/t-eff-pi-ect-age.sas sgrpp 27OCT2011 12:52

Table 14.2.1 / 7: Contraceptive efficacy (ectopic pregnancies) by treatment and age-group (FAS) (cont.)

Pearl Index: adj.

Age group: age <= 25

| Time    | TREATMENT | Number of subjects | Total exposure [WY] | Excluded exposure [WY] | Relevant exposure [WY] | Number of pregnancies | Pearl index | Lower 95% CIL | Upper 95% CIL |
|---------|-----------|--------------------|---------------------|------------------------|------------------------|-----------------------|-------------|---------------|---------------|
| overall | LCS12     | 566                | 1189.59             | 84.86                  | 1104.73                | 2                     | 0.18        | 0.02          | 0.65          |
|         | LCS16     | 564                | 1269.51             | 71.85                  | 1197.66                | 2                     | 0.17        | 0.02          | 0.60          |
| year 1  | LCS12     | 566                | 486.04              | 35.47                  | 450.56                 | 1                     | 0.22        | 0.01          | 1.24          |
|         | LCS16     | 564                | 502.10              | 34.24                  | 467.86                 | 1                     | 0.21        | 0.01          | 1.19          |
| year 2  | LCS12     | 432                | 388.32              | 23.35                  | 364.97                 | 1                     | 0.27        | 0.01          | 1.53          |
|         | LCS16     | 458                | 417.98              | 22.70                  | 395.28                 | 0                     | 0.00        | 0.00          | 0.93          |
| year 3  | LCS12     | 349                | 311.81              | 24.72                  | 287.09                 | 0                     | 0.00        | 0.00          | 1.28          |
|         | LCS16     | 378                | 344.44              | 14.13                  | 330.32                 | 1                     | 0.30        | 0.01          | 1.69          |
| 2 years | LCS12     | 566                | 874.36              | 58.83                  | 815.53                 | 2                     | 0.25        | 0.03          | 0.89          |
|         | LCS16     | 564                | 920.07              | 56.93                  | 863.14                 | 1                     | 0.12        | 0.00          | 0.65          |
| 3 years | LCS12     | 566                | 1186.17             | 83.55                  | 1102.62                | 2                     | 0.18        | 0.02          | 0.66          |
|         | LCS16     | 564                | 1264.52             | 71.06                  | 1193.45                | 2                     | 0.17        | 0.02          | 0.61          |

Note: WY = women years, 1 WY equals to 365 days, CIL = confidence interval limit

Global Biostatistics: /by-sasp/patdb/projects/de04209/310442/stat/prod\_interim03/pgms/t-eff-pi-ect-age.sas sgrpp 27OCT2011 12:52



Table 14.2.1 / 7: Contraceptive efficacy (ectopic pregnancies) by treatment and age-group (FAS) (cont.)

Pearl Index: adj.

Age group: 25 < age <= 35

| Time    | TREATMENT | Number of subjects | Total exposure [WY] | Excluded exposure [WY] | Relevant exposure [WY] | Number of pregnancies | Pearl index | Lower 95% CIL | Upper 95% CIL |
|---------|-----------|--------------------|---------------------|------------------------|------------------------|-----------------------|-------------|---------------|---------------|
| overall | LCS12     | 866                | 2001.96             | 65.75                  | 1936.22                | 1                     | 0.05        | 0.00          | 0.29          |
|         | LCS16     | 888                | 2050.73             | 55.92                  | 1994.80                | 5                     | 0.25        | 0.08          | 0.58          |
| year 1  | LCS12     | 866                | 784.38              | 26.12                  | 758.26                 | 1                     | 0.13        | 0.00          | 0.73          |
|         | LCS16     | 888                | 798.82              | 28.05                  | 770.76                 | 1                     | 0.13        | 0.00          | 0.72          |
| year 2  | LCS12     | 723                | 660.32              | 16.73                  | 643.59                 | 0                     | 0.00        | 0.00          | 0.57          |
|         | LCS16     | 740                | 677.65              | 14.57                  | 663.08                 | 3                     | 0.45        | 0.09          | 1.32          |
| year 3  | LCS12     | 604                | 551.63              | 20.04                  | 531.59                 | 0                     | 0.00        | 0.00          | 0.69          |
|         | LCS16     | 622                | 567.25              | 12.79                  | 554.47                 | 1                     | 0.18        | 0.00          | 1.00          |
| 2 years | LCS12     | 866                | 1444.70             | 42.85                  | 1401.85                | 1                     | 0.07        | 0.00          | 0.40          |
|         | LCS16     | 888                | 1476.47             | 42.62                  | 1433.85                | 4                     | 0.28        | 0.08          | 0.71          |
| 3 years | LCS12     | 866                | 1996.33             | 62.88                  | 1933.44                | 1                     | 0.05        | 0.00          | 0.29          |
|         | LCS16     | 888                | 2043.73             | 55.41                  | 1988.31                | 5                     | 0.25        | 0.08          | 0.59          |

Note: WY = women years, 1 WY equals to 365 days, CIL = confidence interval limit

Global Biostatistics: /by-sasp/patdb/projects/de04209/310442/stat/prod\_interim03/pgms/t-eff-pi-ect-age.sas sgrpp 27OCT2011 12:52

End of table

**Table 14.2.1 / 8: Contraceptive efficacy (ectopic pregnancies) by treatment and parity (FAS)**

Pearl Index: unadj.

Parity: 0 births

| Time    | TREATMENT | Number of subjects | Total exposure [WY] | Excluded exposure [WY] | Relevant exposure [WY] | Number of pregnancies | Pearl index | Lower 95% CIL | Upper 95% CIL |
|---------|-----------|--------------------|---------------------|------------------------|------------------------|-----------------------|-------------|---------------|---------------|
| overall | LCS12     | 556                | 1211.65             | 99.27                  | 1112.38                | 2                     | 0.18        | 0.02          | 0.65          |
|         | LCS16     | 574                | 1283.30             | 74.15                  | 1209.16                | 3                     | 0.25        | 0.05          | 0.73          |
| year 1  | LCS12     | 556                | 489.40              | 42.52                  | 446.88                 | 1                     | 0.22        | 0.01          | 1.25          |
|         | LCS16     | 574                | 508.51              | 35.12                  | 473.39                 | 0                     | 0.00        | 0.00          | 0.78          |
| year 2  | LCS12     | 438                | 395.52              | 28.17                  | 367.34                 | 1                     | 0.27        | 0.01          | 1.52          |
|         | LCS16     | 459                | 420.01              | 21.54                  | 398.47                 | 1                     | 0.25        | 0.01          | 1.40          |
| year 3  | LCS12     | 354                | 323.63              | 27.22                  | 296.41                 | 0                     | 0.00        | 0.00          | 1.24          |
|         | LCS16     | 380                | 350.26              | 16.78                  | 333.48                 | 2                     | 0.60        | 0.07          | 2.17          |
| 2 years | LCS12     | 556                | 884.92              | 70.69                  | 814.22                 | 2                     | 0.25        | 0.03          | 0.89          |
|         | LCS16     | 574                | 928.52              | 56.66                  | 871.86                 | 1                     | 0.11        | 0.00          | 0.64          |
| 3 years | LCS12     | 556                | 1208.55             | 97.92                  | 1110.63                | 2                     | 0.18        | 0.02          | 0.65          |
|         | LCS16     | 574                | 1278.78             | 73.44                  | 1205.33                | 3                     | 0.25        | 0.05          | 0.73          |

Note: WY = women years, 1 WY equals to 365 days, CIL = confidence interval limit

GB: /by-sasp/patdb/projects/de04209/310442/stat/prod\_interim03/pgms/t-eff-pi-ect-parity.sas sgrpp 27OCT2011 12:53

Table 14.2.1 / 8: Contraceptive efficacy (ectopic pregnancies) by treatment and parity (FAS) (cont.)

 Pearl Index: unadj.  
 Parity: 1 birth or more

| Time    | TREATMENT | Number of subjects | Total exposure [WY] | Excluded exposure [WY] | Relevant exposure [WY] | Number of pregnancies | Pearl index | Lower 95% CIL | Upper 95% CIL |
|---------|-----------|--------------------|---------------------|------------------------|------------------------|-----------------------|-------------|---------------|---------------|
| overall | LCS12     | 876                | 2005.35             | 54.04                  | 1951.32                | 1                     | 0.05        | 0.00          | 0.29          |
|         | LCS16     | 878                | 2068.68             | 55.78                  | 2012.91                | 4                     | 0.20        | 0.05          | 0.51          |
| year 1  | LCS12     | 876                | 790.82              | 19.92                  | 770.90                 | 1                     | 0.13        | 0.00          | 0.72          |
|         | LCS16     | 878                | 807.86              | 28.47                  | 779.38                 | 2                     | 0.26        | 0.03          | 0.93          |
| year 2  | LCS12     | 724                | 661.47              | 13.14                  | 648.33                 | 0                     | 0.00        | 0.00          | 0.57          |
|         | LCS16     | 747                | 685.32              | 16.29                  | 669.03                 | 2                     | 0.30        | 0.04          | 1.08          |
| year 3  | LCS12     | 606                | 546.79              | 18.03                  | 528.76                 | 0                     | 0.00        | 0.00          | 0.70          |
|         | LCS16     | 630                | 568.04              | 10.42                  | 557.62                 | 0                     | 0.00        | 0.00          | 0.66          |
| 2 years | LCS12     | 876                | 1452.29             | 33.06                  | 1419.23                | 1                     | 0.07        | 0.00          | 0.39          |
|         | LCS16     | 878                | 1493.17             | 44.76                  | 1448.41                | 4                     | 0.28        | 0.08          | 0.71          |
| 3 years | LCS12     | 876                | 1999.07             | 51.08                  | 1947.99                | 1                     | 0.05        | 0.00          | 0.29          |
|         | LCS16     | 878                | 2061.21             | 55.19                  | 2006.03                | 4                     | 0.20        | 0.05          | 0.51          |

Note: WY = women years, 1 WY equals to 365 days, CIL = confidence interval limit

GB: /by-sasp/patdb/projects/de04209/310442/stat/prod\_interim03/pgms/t-eff-pi-ect-parity.sas sgrpp 27OCT2011 12:53

Table 14.2.1 / 8: Contraceptive efficacy (ectopic pregnancies) by treatment and parity (FAS) (cont.)

Pearl Index: adj.

Parity: 0 births

| Time    | TREATMENT | Number of subjects | Total exposure [WY] | Excluded exposure [WY] | Relevant exposure [WY] | Number of pregnancies | Pearl index | Lower 95% CIL | Upper 95% CIL |
|---------|-----------|--------------------|---------------------|------------------------|------------------------|-----------------------|-------------|---------------|---------------|
| overall | LCS12     | 556                | 1200.91             | 97.98                  | 1102.93                | 2                     | 0.18        | 0.02          | 0.66          |
|         | LCS16     | 574                | 1271.13             | 72.95                  | 1198.18                | 3                     | 0.25        | 0.05          | 0.73          |
| year 1  | LCS12     | 556                | 485.87              | 42.09                  | 443.78                 | 1                     | 0.23        | 0.01          | 1.26          |
|         | LCS16     | 574                | 502.21              | 34.22                  | 467.99                 | 0                     | 0.00        | 0.00          | 0.79          |
| year 2  | LCS12     | 436                | 391.53              | 27.55                  | 363.99                 | 1                     | 0.27        | 0.01          | 1.53          |
|         | LCS16     | 456                | 416.31              | 21.37                  | 394.93                 | 1                     | 0.25        | 0.01          | 1.41          |
| year 3  | LCS12     | 351                | 320.55              | 27.04                  | 293.51                 | 0                     | 0.00        | 0.00          | 1.26          |
|         | LCS16     | 376                | 348.08              | 16.65                  | 331.44                 | 2                     | 0.60        | 0.07          | 2.18          |
| 2 years | LCS12     | 556                | 877.41              | 69.64                  | 807.77                 | 2                     | 0.25        | 0.03          | 0.89          |
|         | LCS16     | 574                | 918.52              | 55.60                  | 862.92                 | 1                     | 0.12        | 0.00          | 0.65          |
| 3 years | LCS12     | 556                | 1197.95             | 96.68                  | 1101.28                | 2                     | 0.18        | 0.02          | 0.66          |
|         | LCS16     | 574                | 1266.60             | 72.24                  | 1194.36                | 3                     | 0.25        | 0.05          | 0.73          |

Note: WY = women years, 1 WY equals to 365 days, CIL = confidence interval limit

GB: /by-sasp/patdb/projects/de04209/310442/stat/prod\_interim03/pgms/t-eff-pi-ect-parity.sas sgrpp 27OCT2011 12:53

Table 14.2.1 / 8: Contraceptive efficacy (ectopic pregnancies) by treatment and parity (FAS) (cont.)

Pearl Index: adj.

Parity: 1 birth or more

| Time    | TREATMENT | Number of subjects | Total exposure [WY] | Excluded exposure [WY] | Relevant exposure [WY] | Number of pregnancies | Pearl index | Lower 95% CIL | Upper 95% CIL |
|---------|-----------|--------------------|---------------------|------------------------|------------------------|-----------------------|-------------|---------------|---------------|
| overall | LCS12     | 876                | 1990.64             | 52.63                  | 1938.01                | 1                     | 0.05        | 0.00          | 0.29          |
|         | LCS16     | 878                | 2049.11             | 54.82                  | 1994.29                | 4                     | 0.20        | 0.05          | 0.51          |
| year 1  | LCS12     | 876                | 784.55              | 19.50                  | 765.04                 | 1                     | 0.13        | 0.00          | 0.73          |
|         | LCS16     | 878                | 798.70              | 28.07                  | 770.64                 | 2                     | 0.26        | 0.03          | 0.94          |
| year 2  | LCS12     | 719                | 657.10              | 12.53                  | 644.57                 | 0                     | 0.00        | 0.00          | 0.57          |
|         | LCS16     | 742                | 679.32              | 15.90                  | 663.43                 | 2                     | 0.30        | 0.04          | 1.09          |
| year 3  | LCS12     | 602                | 542.89              | 17.72                  | 525.18                 | 0                     | 0.00        | 0.00          | 0.70          |
|         | LCS16     | 624                | 563.61              | 10.27                  | 553.35                 | 0                     | 0.00        | 0.00          | 0.67          |
| 2 years | LCS12     | 876                | 1441.65             | 32.04                  | 1409.61                | 1                     | 0.07        | 0.00          | 0.40          |
|         | LCS16     | 878                | 1478.03             | 43.96                  | 1434.07                | 4                     | 0.28        | 0.08          | 0.71          |
| 3 years | LCS12     | 876                | 1984.54             | 49.75                  | 1934.79                | 1                     | 0.05        | 0.00          | 0.29          |
|         | LCS16     | 878                | 2041.64             | 54.23                  | 1987.41                | 4                     | 0.20        | 0.05          | 0.52          |

Note: WY = women years, 1 WY equals to 365 days, CIL = confidence interval limit

GB: /by-sasp/patdb/projects/de04209/310442/stat/prod\_interim03/pgms/t-eff-pi-ect-parity.sas sgrpp 27OCT2011 12:53

End of table

**Table 14.2.1 / 9: Contraceptive efficacy (ectopic pregnancies) by treatment and BMI-group (FAS)**

 Pearl Index: unadj.  
 BMI group: missing

| Time    | TREATMENT | Number of subjects | Total exposure [WY] | Excluded exposure [WY] | Relevant exposure [WY] | Number of pregnancies | Pearl index | Lower 95% CIL | Upper 95% CIL |
|---------|-----------|--------------------|---------------------|------------------------|------------------------|-----------------------|-------------|---------------|---------------|
| overall | LCS12     | 1                  | 2.07                | 0.10                   | 1.96                   | 0                     | 0.00        | 0.00          | 188.05        |
|         | LCS16     | 4                  | 8.15                | 0.02                   | 8.13                   | 0                     | 0.00        | 0.00          | 45.37         |
| year 1  | LCS12     | 1                  | 1.00                | 0.08                   | 0.92                   | 0                     | 0.00        | 0.00          | 403.13        |
|         | LCS16     | 4                  | 3.57                | 0.02                   | 3.55                   | 0                     | 0.00        | 0.00          | 103.89        |
| year 2  | LCS12     | 1                  | 1.00                | 0.00                   | 1.00                   | 0                     | 0.00        | 0.00          | 368.89        |
|         | LCS16     | 3                  | 2.59                | 0.00                   | 2.59                   | 0                     | 0.00        | 0.00          | 142.18        |
| year 3  | LCS12     | 1                  | 0.07                | 0.02                   | 0.05                   | 0                     | 0.00        | 0.00          | 7920.24       |
|         | LCS16     | 2                  | 1.99                | 0.00                   | 1.99                   | 0                     | 0.00        | 0.00          | 185.72        |
| 2 years | LCS12     | 1                  | 2.00                | 0.08                   | 1.92                   | 0                     | 0.00        | 0.00          | 192.62        |
|         | LCS16     | 4                  | 6.16                | 0.02                   | 6.15                   | 0                     | 0.00        | 0.00          | 60.03         |
| 3 years | LCS12     | 1                  | 2.07                | 0.10                   | 1.96                   | 0                     | 0.00        | 0.00          | 188.05        |
|         | LCS16     | 4                  | 8.15                | 0.02                   | 8.13                   | 0                     | 0.00        | 0.00          | 45.37         |

Note: WY = women years, 1 WY equals to 365 days, CIL = confidence interval limit

Global Biostatistics: /by-sasp/patdb/projects/de04209/310442/stat/prod\_interim03/pgms/t-eff-pi-ect-bmi.sas sgrpp 27OCT2011 12:53

Table 14.2.1 / 9: Contraceptive efficacy (ectopic pregnancies) by treatment and BMI-group (FAS) (cont.)

Pearl Index: unadj.

BMI group: &lt; 30 kg/m2

| Time    | TREATMENT | Number of subjects | Total exposure [WY] | Excluded exposure [WY] | Relevant exposure [WY] | Number of pregnancies | Pearl index | Lower 95% CIL | Upper 95% CIL |
|---------|-----------|--------------------|---------------------|------------------------|------------------------|-----------------------|-------------|---------------|---------------|
| overall | LCS12     | 1187               | 2672.43             | 121.88                 | 2550.55                | 3                     | 0.12        | 0.02          | 0.34          |
|         | LCS16     | 1198               | 2781.56             | 108.49                 | 2673.07                | 5                     | 0.19        | 0.06          | 0.44          |
| year 1  | LCS12     | 1187               | 1059.53             | 49.80                  | 1009.73                | 2                     | 0.20        | 0.02          | 0.72          |
|         | LCS16     | 1198               | 1090.09             | 51.99                  | 1038.10                | 1                     | 0.10        | 0.00          | 0.54          |
| year 2  | LCS12     | 960                | 879.05              | 30.98                  | 848.07                 | 1                     | 0.12        | 0.00          | 0.66          |
|         | LCS16     | 1000               | 917.49              | 31.77                  | 885.72                 | 2                     | 0.23        | 0.03          | 0.82          |
| year 3  | LCS12     | 801                | 727.47              | 37.96                  | 689.51                 | 0                     | 0.00        | 0.00          | 0.54          |
|         | LCS16     | 840                | 764.71              | 23.71                  | 741.01                 | 2                     | 0.27        | 0.03          | 0.97          |
| 2 years | LCS12     | 1187               | 1938.58             | 80.77                  | 1857.81                | 3                     | 0.16        | 0.03          | 0.47          |
|         | LCS16     | 1198               | 2007.58             | 83.76                  | 1923.81                | 3                     | 0.16        | 0.03          | 0.46          |
| 3 years | LCS12     | 1187               | 2666.05             | 118.73                 | 2547.32                | 3                     | 0.12        | 0.02          | 0.34          |
|         | LCS16     | 1198               | 2772.29             | 107.47                 | 2664.82                | 5                     | 0.19        | 0.06          | 0.44          |

Note: WY = women years, 1 WY equals to 365 days, CIL = confidence interval limit

Global Biostatistics: /by-sasp/patdb/projects/de04209/310442/stat/prod\_interim03/pgms/t-eff-pi-ect-bmi.sas sgrpp 27OCT2011 12:53

Table 14.2.1 / 9: Contraceptive efficacy (ectopic pregnancies) by treatment and BMI-group (FAS) (cont.)

Pearl Index: unadj.

BMI group:  $\geq 30$  kg/m<sup>2</sup>

| Time    | TREATMENT | Number of subjects | Total exposure [WY] | Excluded exposure [WY] | Relevant exposure [WY] | Number of pregnancies | Pearl index | Lower 95% CIL | Upper 95% CIL |
|---------|-----------|--------------------|---------------------|------------------------|------------------------|-----------------------|-------------|---------------|---------------|
| overall | LCS12     | 244                | 542.51              | 31.32                  | 511.19                 | 0                     | 0.00        | 0.00          | 0.72          |
|         | LCS16     | 250                | 562.28              | 21.42                  | 540.87                 | 2                     | 0.37        | 0.04          | 1.34          |
| year 1  | LCS12     | 244                | 219.69              | 12.56                  | 207.13                 | 0                     | 0.00        | 0.00          | 1.78          |
|         | LCS16     | 250                | 222.71              | 11.58                  | 211.13                 | 1                     | 0.47        | 0.01          | 2.64          |
| year 2  | LCS12     | 201                | 176.93              | 10.33                  | 166.60                 | 0                     | 0.00        | 0.00          | 2.21          |
|         | LCS16     | 203                | 185.24              | 6.06                   | 179.18                 | 1                     | 0.56        | 0.01          | 3.11          |
| year 3  | LCS12     | 158                | 142.88              | 7.27                   | 135.61                 | 0                     | 0.00        | 0.00          | 2.72          |
|         | LCS16     | 168                | 151.60              | 3.50                   | 148.10                 | 0                     | 0.00        | 0.00          | 2.49          |
| 2 years | LCS12     | 244                | 396.62              | 22.89                  | 373.73                 | 0                     | 0.00        | 0.00          | 0.99          |
|         | LCS16     | 250                | 407.95              | 17.64                  | 390.31                 | 2                     | 0.51        | 0.06          | 1.85          |
| 3 years | LCS12     | 244                | 539.51              | 30.16                  | 509.34                 | 0                     | 0.00        | 0.00          | 0.72          |
|         | LCS16     | 250                | 559.55              | 21.14                  | 538.41                 | 2                     | 0.37        | 0.04          | 1.34          |

Note: WY = women years, 1 WY equals to 365 days, CIL = confidence interval limit

Global Biostatistics: /by-sasp/patdb/projects/de04209/310442/stat/prod\_interim03/pgms/t-eff-pi-ect-bmi.sas sgrpp 27OCT2011 12:53



Table 14.2.1 / 9: Contraceptive efficacy (ectopic pregnancies) by treatment and BMI-group (FAS) (cont.)

Pearl Index: adj.

BMI group: missing

| Time    | TREATMENT | Number of subjects | Total exposure [WY] | Excluded exposure [WY] | Relevant exposure [WY] | Number of pregnancies | Pearl index | Lower 95% CIL | Upper 95% CIL |
|---------|-----------|--------------------|---------------------|------------------------|------------------------|-----------------------|-------------|---------------|---------------|
| overall | LCS12     | 1                  | 2.07                | 0.10                   | 1.96                   | 0                     | 0.00        | 0.00          | 188.05        |
|         | LCS16     | 4                  | 8.15                | 0.02                   | 8.13                   | 0                     | 0.00        | 0.00          | 45.37         |
| year 1  | LCS12     | 1                  | 1.00                | 0.08                   | 0.92                   | 0                     | 0.00        | 0.00          | 403.13        |
|         | LCS16     | 4                  | 3.57                | 0.02                   | 3.55                   | 0                     | 0.00        | 0.00          | 103.89        |
| year 2  | LCS12     | 1                  | 1.00                | 0.00                   | 1.00                   | 0                     | 0.00        | 0.00          | 368.89        |
|         | LCS16     | 3                  | 2.59                | 0.00                   | 2.59                   | 0                     | 0.00        | 0.00          | 142.18        |
| year 3  | LCS12     | 1                  | 0.07                | 0.02                   | 0.05                   | 0                     | 0.00        | 0.00          | 7920.24       |
|         | LCS16     | 2                  | 1.99                | 0.00                   | 1.99                   | 0                     | 0.00        | 0.00          | 185.72        |
| 2 years | LCS12     | 1                  | 2.00                | 0.08                   | 1.92                   | 0                     | 0.00        | 0.00          | 192.62        |
|         | LCS16     | 4                  | 6.16                | 0.02                   | 6.15                   | 0                     | 0.00        | 0.00          | 60.03         |
| 3 years | LCS12     | 1                  | 2.07                | 0.10                   | 1.96                   | 0                     | 0.00        | 0.00          | 188.05        |
|         | LCS16     | 4                  | 8.15                | 0.02                   | 8.13                   | 0                     | 0.00        | 0.00          | 45.37         |

Note: WY = women years, 1 WY equals to 365 days, CIL = confidence interval limit

Global Biostatistics: /by-sasp/patdb/projects/de04209/310442/stat/prod\_interim03/pgms/t-eff-pi-ect-bmi.sas sgrpp 27OCT2011 12:53

Table 14.2.1 / 9: Contraceptive efficacy (ectopic pregnancies) by treatment and BMI-group (FAS) (cont.)

Pearl Index: adj.

BMI group: &lt; 30 kg/m2

| Time    | TREATMENT | Number of subjects | Total exposure [WY] | Excluded exposure [WY] | Relevant exposure [WY] | Number of pregnancies | Pearl index | Lower 95% CIL | Upper 95% CIL |
|---------|-----------|--------------------|---------------------|------------------------|------------------------|-----------------------|-------------|---------------|---------------|
| overall | LCS12     | 1187               | 2650.97             | 119.51                 | 2531.46                | 3                     | 0.12        | 0.02          | 0.35          |
|         | LCS16     | 1198               | 2757.19             | 106.86                 | 2650.33                | 5                     | 0.19        | 0.06          | 0.44          |
| year 1  | LCS12     | 1187               | 1052.56             | 49.17                  | 1003.39                | 2                     | 0.20        | 0.02          | 0.72          |
|         | LCS16     | 1198               | 1079.20             | 51.15                  | 1028.05                | 1                     | 0.10        | 0.00          | 0.54          |
| year 2  | LCS12     | 955                | 870.88              | 29.78                  | 841.09                 | 1                     | 0.12        | 0.00          | 0.66          |
|         | LCS16     | 994                | 909.24              | 31.26                  | 877.98                 | 2                     | 0.23        | 0.03          | 0.82          |
| year 3  | LCS12     | 794                | 721.39              | 37.50                  | 683.89                 | 0                     | 0.00        | 0.00          | 0.54          |
|         | LCS16     | 831                | 759.48              | 23.44                  | 736.05                 | 2                     | 0.27        | 0.03          | 0.98          |
| 2 years | LCS12     | 1187               | 1923.44             | 78.95                  | 1844.48                | 3                     | 0.16        | 0.03          | 0.48          |
|         | LCS16     | 1198               | 1988.44             | 82.41                  | 1906.03                | 3                     | 0.16        | 0.03          | 0.46          |
| 3 years | LCS12     | 1187               | 2644.82             | 116.45                 | 2528.38                | 3                     | 0.12        | 0.02          | 0.35          |
|         | LCS16     | 1198               | 2747.92             | 105.84                 | 2642.08                | 5                     | 0.19        | 0.06          | 0.44          |

Note: WY = women years, 1 WY equals to 365 days, CIL = confidence interval limit

Global Biostatistics: /by-sasp/patdb/projects/de04209/310442/stat/prod\_interim03/pgms/t-eff-pi-ect-bmi.sas sgrpp 27OCT2011 12:53

Table 14.2.1 / 9: Contraceptive efficacy (ectopic pregnancies) by treatment and BMI-group (FAS) (cont.)

Pearl Index: adj.

 BMI group:  $\geq 30$  kg/m<sup>2</sup>

| Time    | TREATMENT | Number of subjects | Total exposure [WY] | Excluded exposure [WY] | Relevant exposure [WY] | Number of pregnancies | Pearl index | Lower 95% CIL | Upper 95% CIL |
|---------|-----------|--------------------|---------------------|------------------------|------------------------|-----------------------|-------------|---------------|---------------|
| overall | LCS12     | 244                | 538.51              | 30.99                  | 507.52                 | 0                     | 0.00        | 0.00          | 0.73          |
|         | LCS16     | 250                | 554.90              | 20.89                  | 534.01                 | 2                     | 0.37        | 0.05          | 1.35          |
| year 1  | LCS12     | 244                | 216.86              | 12.34                  | 204.52                 | 0                     | 0.00        | 0.00          | 1.80          |
|         | LCS16     | 250                | 218.15              | 11.13                  | 207.02                 | 1                     | 0.48        | 0.01          | 2.69          |
| year 2  | LCS12     | 199                | 176.76              | 10.30                  | 166.47                 | 0                     | 0.00        | 0.00          | 2.22          |
|         | LCS16     | 201                | 183.80              | 6.01                   | 177.79                 | 1                     | 0.56        | 0.01          | 3.13          |
| year 3  | LCS12     | 158                | 141.98              | 7.24                   | 134.74                 | 0                     | 0.00        | 0.00          | 2.74          |
|         | LCS16     | 167                | 150.23              | 3.48                   | 146.75                 | 0                     | 0.00        | 0.00          | 2.51          |
| 2 years | LCS12     | 244                | 393.62              | 22.64                  | 370.99                 | 0                     | 0.00        | 0.00          | 0.99          |
|         | LCS16     | 250                | 401.95              | 17.13                  | 384.81                 | 2                     | 0.52        | 0.06          | 1.88          |
| 3 years | LCS12     | 244                | 535.61              | 29.88                  | 505.73                 | 0                     | 0.00        | 0.00          | 0.73          |
|         | LCS16     | 250                | 552.17              | 20.61                  | 531.56                 | 2                     | 0.38        | 0.05          | 1.36          |

Note: WY = women years, 1 WY equals to 365 days, CIL = confidence interval limit

Global Biostatistics: /by-sasp/patdb/projects/de04209/310442/stat/prod\_interim03/pgms/t-eff-pi-ect-bmi.sas sgrpp 27OCT2011 12:53

End of table

**Table 14.2.1 / 10: Probability of getting pregnant by treatment (Kaplan-Meier analysis) (FAS)**

Analysis type: unadj.

| Time    | TREATMENT | Number of subjects | Total exposure [WY] | Excluded exposure [WY] | Relevant exposure [WY] | Number of pregnancies | Cumulative probability | lower 95% CIL | upper 95% CIL |
|---------|-----------|--------------------|---------------------|------------------------|------------------------|-----------------------|------------------------|---------------|---------------|
| year 1  | LCS12     | 1432               | 1280.22             | 62.44                  | 1217.78                | 5                     | 0.004                  | 0.002         | 0.010         |
|         | LCS16     | 1452               | 1316.37             | 63.59                  | 1252.78                | 2                     | 0.002                  | 0.000         | 0.007         |
| year 2  | LCS12     | 1162               | 1056.98             | 41.31                  | 1015.67                | 3                     | 0.003                  | 0.001         | 0.009         |
|         | LCS16     | 1206               | 1105.32             | 37.83                  | 1067.49                | 4                     | 0.004                  | 0.001         | 0.010         |
| year 3  | LCS12     | 960                | 870.42              | 45.25                  | 825.17                 | 2                     | 0.002                  | 0.001         | 0.009         |
|         | LCS16     | 1010               | 918.30              | 27.21                  | 891.09                 | 4                     | 0.004                  | 0.002         | 0.011         |
| 2 years | LCS12     | 1432               | 2337.20             | 103.75                 | 2233.45                | 8                     | 0.007                  | 0.003         | 0.014         |
|         | LCS16     | 1452               | 2421.69             | 101.42                 | 2320.27                | 6                     | 0.005                  | 0.002         | 0.012         |
| 3 years | LCS12     | 1432               | 3207.62             | 149.00                 | 3058.62                | 10                    | 0.009                  | 0.005         | 0.017         |
|         | LCS16     | 1452               | 3339.99             | 128.63                 | 3211.36                | 10                    | 0.010                  | 0.005         | 0.018         |

Note: WY = women years, 1 WY equals to 365 days, CIL = confidence interval limit

Global Biostatistics: /by-sasp/patdb/projects/de04209/310442/stat/prod\_interim03/pgms/i-eff-km-all.sas sgrpp 27OCT2011 12:53

Table 14.2.1 / 10: Probability of getting pregnant by treatment (Kaplan-Meier analysis) (FAS) (cont.)

Analysis type: adj.

| Time    | TREATMENT | Number of subjects | Total exposure [WY] | Excluded exposure [WY] | Relevant exposure [WY] | Number of pregnancies | Cumulative probability | lower 95% CIL | upper 95% CIL |
|---------|-----------|--------------------|---------------------|------------------------|------------------------|-----------------------|------------------------|---------------|---------------|
| year 1  | LCS12     | 1432               | 1270.42             | 61.59                  | 1208.82                | 5                     | 0.004                  | 0.002         | 0.010         |
|         | LCS16     | 1452               | 1300.92             | 62.29                  | 1238.62                | 2                     | 0.002                  | 0.000         | 0.007         |
| year 2  | LCS12     | 1155               | 1048.64             | 40.08                  | 1008.56                | 3                     | 0.003                  | 0.001         | 0.009         |
|         | LCS16     | 1198               | 1095.63             | 37.27                  | 1058.36                | 4                     | 0.004                  | 0.001         | 0.010         |
| year 3  | LCS12     | 953                | 863.44              | 44.76                  | 818.68                 | 2                     | 0.002                  | 0.001         | 0.009         |
|         | LCS16     | 1000               | 911.70              | 26.92                  | 884.78                 | 4                     | 0.004                  | 0.002         | 0.011         |
| 2 years | LCS12     | 1432               | 2319.06             | 101.67                 | 2217.38                | 8                     | 0.007                  | 0.003         | 0.014         |
|         | LCS16     | 1452               | 2396.55             | 99.56                  | 2296.99                | 6                     | 0.005                  | 0.002         | 0.012         |
| 3 years | LCS12     | 1432               | 3182.50             | 146.43                 | 3036.07                | 10                    | 0.009                  | 0.005         | 0.017         |
|         | LCS16     | 1452               | 3308.24             | 126.47                 | 3181.77                | 10                    | 0.010                  | 0.005         | 0.018         |

Note: WY = women years, 1 WY equals to 365 days, CIL = confidence interval limit

Global Biostatistics: /by-sasp/patdb/projects/de04209/310442/stat/prod\_interim03/pgms/i-eff-km-all.sas sgrpp 27OCT2011 12:53

End of table

**Table 14.2.1 / 11: Probability of getting pregnant by treatment and age-group (Kaplan-Meier analysis) (FAS)**

Analysis type: unadj.

Age category: age <= 25

| Time    | TREATMENT | Number of subjects | Total exposure [WY] | Excluded exposure [WY] | Relevant exposure [WY] | Number of pregnancies | Cumulative probability | lower 95% CIL | upper 95% CIL |
|---------|-----------|--------------------|---------------------|------------------------|------------------------|-----------------------|------------------------|---------------|---------------|
| year 1  | LCS12     | 566                | 491.49              | 35.87                  | 455.62                 | 1                     | 0.002                  | 0.000         | 0.013         |
|         | LCS16     | 564                | 508.48              | 35.16                  | 473.33                 | 1                     | 0.002                  | 0.000         | 0.018         |
| year 2  | LCS12     | 435                | 392.29              | 24.00                  | 368.29                 | 2                     | 0.005                  | 0.001         | 0.019         |
|         | LCS16     | 461                | 423.65              | 23.01                  | 400.65                 | 0                     | 0.000                  | 0.000         | 0.000         |
| year 3  | LCS12     | 354                | 315.24              | 24.95                  | 290.30                 | 1                     | 0.003                  | 0.000         | 0.022         |
|         | LCS16     | 383                | 347.48              | 14.27                  | 333.21                 | 1                     | 0.003                  | 0.000         | 0.019         |
| 2 years | LCS12     | 566                | 883.78              | 59.87                  | 823.92                 | 3                     | 0.007                  | 0.002         | 0.022         |
|         | LCS16     | 564                | 932.14              | 58.16                  | 873.98                 | 1                     | 0.002                  | 0.000         | 0.015         |
| 3 years | LCS12     | 566                | 1199.03             | 84.82                  | 1114.21                | 4                     | 0.010                  | 0.004         | 0.027         |
|         | LCS16     | 564                | 1279.62             | 72.43                  | 1207.19                | 2                     | 0.005                  | 0.001         | 0.019         |

Note: WY = women years, 1 WY equals to 365 days, CIL = confidence interval limit

Global Biostatistics: /by-sasp/patdb/projects/de04209/310442/stat/prod\_interim03/pgms/i-eff-km-age.sas sgrpp 27OCT2011 12:53

Table 14.2.1 / 11: Probability of getting pregnant by treatment and age-group (Kaplan-Meier analysis) (FAS) (cont.)

Analysis type: unadj.

Age category: 25 &lt; age &lt;= 35

| Time    | TREATMENT | Number of subjects | Total exposure [WY] | Excluded exposure [WY] | Relevant exposure [WY] | Number of pregnancies | Cumulative probability | lower 95% CIL | upper 95% CIL |
|---------|-----------|--------------------|---------------------|------------------------|------------------------|-----------------------|------------------------|---------------|---------------|
| year 1  | LCS12     | 866                | 788.73              | 26.57                  | 762.15                 | 4                     | 0.005                  | 0.002         | 0.014         |
|         | LCS16     | 888                | 807.88              | 28.43                  | 779.45                 | 1                     | 0.001                  | 0.000         | 0.010         |
| year 2  | LCS12     | 727                | 664.69              | 17.31                  | 647.38                 | 1                     | 0.002                  | 0.000         | 0.011         |
|         | LCS16     | 745                | 681.67              | 14.82                  | 666.84                 | 4                     | 0.006                  | 0.002         | 0.016         |
| year 3  | LCS12     | 606                | 555.18              | 20.30                  | 534.87                 | 1                     | 0.002                  | 0.000         | 0.013         |
|         | LCS16     | 627                | 570.82              | 12.94                  | 557.88                 | 3                     | 0.005                  | 0.002         | 0.016         |
| 2 years | LCS12     | 866                | 1453.42             | 43.88                  | 1409.54                | 5                     | 0.007                  | 0.003         | 0.016         |
|         | LCS16     | 888                | 1489.55             | 43.26                  | 1446.29                | 5                     | 0.007                  | 0.003         | 0.017         |
| 3 years | LCS12     | 866                | 2008.59             | 64.18                  | 1944.41                | 6                     | 0.008                  | 0.004         | 0.019         |
|         | LCS16     | 888                | 2060.37             | 56.19                  | 2004.17                | 8                     | 0.012                  | 0.006         | 0.025         |

Note: WY = women years, 1 WY equals to 365 days, CIL = confidence interval limit

Global Biostatistics: /by-sasp/patdb/projects/de04209/310442/stat/prod\_interim03/pgms/i-eff-km-age.sas sgrpp 27OCT2011 12:53

Table 14.2.1 / 11: Probability of getting pregnant by treatment and age-group (Kaplan-Meier analysis) (FAS) (cont.)

Analysis type: adj.

Age category: age &lt;= 25

| Time    | TREATMENT | Number of subjects | Total exposure [WY] | Excluded exposure [WY] | Relevant exposure [WY] | Number of pregnancies | Cumulative probability | lower 95% CIL | upper 95% CIL |
|---------|-----------|--------------------|---------------------|------------------------|------------------------|-----------------------|------------------------|---------------|---------------|
| year 1  | LCS12     | 566                | 486.04              | 35.47                  | 450.56                 | 1                     | 0.002                  | 0.000         | 0.014         |
|         | LCS16     | 564                | 502.10              | 34.24                  | 467.86                 | 1                     | 0.003                  | 0.000         | 0.018         |
| year 2  | LCS12     | 432                | 388.32              | 23.35                  | 364.97                 | 2                     | 0.005                  | 0.001         | 0.020         |
|         | LCS16     | 458                | 417.98              | 22.70                  | 395.28                 | 0                     | 0.000                  | 0.000         | 0.000         |
| year 3  | LCS12     | 349                | 311.81              | 24.72                  | 287.09                 | 1                     | 0.003                  | 0.000         | 0.022         |
|         | LCS16     | 378                | 344.44              | 14.13                  | 330.32                 | 1                     | 0.003                  | 0.000         | 0.019         |
| 2 years | LCS12     | 566                | 874.36              | 58.83                  | 815.53                 | 3                     | 0.007                  | 0.002         | 0.022         |
|         | LCS16     | 564                | 920.07              | 56.93                  | 863.14                 | 1                     | 0.002                  | 0.000         | 0.015         |
| 3 years | LCS12     | 566                | 1186.17             | 83.55                  | 1102.62                | 4                     | 0.010                  | 0.004         | 0.027         |
|         | LCS16     | 564                | 1264.52             | 71.06                  | 1193.45                | 2                     | 0.005                  | 0.001         | 0.020         |

Note: WY = women years, 1 WY equals to 365 days, CIL = confidence interval limit

Global Biostatistics: /by-sasp/patdb/projects/de04209/310442/stat/prod\_interim03/pgms/i-eff-km-age.sas sgrpp 27OCT2011 12:53



Table 14.2.1 / 11: Probability of getting pregnant by treatment and age-group (Kaplan-Meier analysis) (FAS) (cont.)

Analysis type: adj.

Age category: 25 < age <= 35

| Time    | TREATMENT | Number of subjects | Total exposure [WY] | Excluded exposure [WY] | Relevant exposure [WY] | Number of pregnancies | Cumulative probability | lower 95% CIL | upper 95% CIL |
|---------|-----------|--------------------|---------------------|------------------------|------------------------|-----------------------|------------------------|---------------|---------------|
| year 1  | LCS12     | 866                | 784.38              | 26.12                  | 758.26                 | 4                     | 0.005                  | 0.002         | 0.014         |
|         | LCS16     | 888                | 798.82              | 28.05                  | 770.76                 | 1                     | 0.001                  | 0.000         | 0.010         |
| year 2  | LCS12     | 723                | 660.32              | 16.73                  | 643.59                 | 1                     | 0.002                  | 0.000         | 0.011         |
|         | LCS16     | 740                | 677.65              | 14.57                  | 663.08                 | 4                     | 0.006                  | 0.002         | 0.016         |
| year 3  | LCS12     | 604                | 551.63              | 20.04                  | 531.59                 | 1                     | 0.002                  | 0.000         | 0.013         |
|         | LCS16     | 622                | 567.25              | 12.79                  | 554.47                 | 3                     | 0.005                  | 0.002         | 0.016         |
| 2 years | LCS12     | 866                | 1444.70             | 42.85                  | 1401.85                | 5                     | 0.007                  | 0.003         | 0.016         |
|         | LCS16     | 888                | 1476.47             | 42.62                  | 1433.85                | 5                     | 0.007                  | 0.003         | 0.018         |
| 3 years | LCS12     | 866                | 1996.33             | 62.88                  | 1933.44                | 6                     | 0.009                  | 0.004         | 0.019         |
|         | LCS16     | 888                | 2043.73             | 55.41                  | 1988.31                | 8                     | 0.012                  | 0.006         | 0.025         |

Note: WY = women years, 1 WY equals to 365 days, CIL = confidence interval limit

Global Biostatistics: /by-sasp/patdb/projects/de04209/310442/stat/prod\_interim03/pgms/i-eff-km-age.sas sgrpp 27OCT2011 12:53

End of table

**Table 14.2.1 / 12: Probability of getting pregnant by treatment and parity (Kaplan-Meier analysis) (FAS)**

Analysis type: unadj.

Parity: 0 births

| Time    | TREATMENT | Number of subjects | Total exposure [WY] | Excluded exposure [WY] | Relevant exposure [WY] | Number of pregnancies | Cumulative probability | lower 95% CIL | upper 95% CIL |
|---------|-----------|--------------------|---------------------|------------------------|------------------------|-----------------------|------------------------|---------------|---------------|
| year 1  | LCS12     | 556                | 489.40              | 42.52                  | 446.88                 | 2                     | 0.004                  | 0.001         | 0.017         |
|         | LCS16     | 574                | 508.51              | 35.12                  | 473.39                 | 0                     | 0.000                  | 0.000         | 0.000         |
| year 2  | LCS12     | 438                | 395.52              | 28.17                  | 367.34                 | 1                     | 0.003                  | 0.000         | 0.018         |
|         | LCS16     | 459                | 420.01              | 21.54                  | 398.47                 | 1                     | 0.003                  | 0.000         | 0.018         |
| year 3  | LCS12     | 354                | 323.63              | 27.22                  | 296.41                 | 1                     | 0.003                  | 0.000         | 0.022         |
|         | LCS16     | 380                | 350.26              | 16.78                  | 333.48                 | 2                     | 0.006                  | 0.001         | 0.023         |
| 2 years | LCS12     | 556                | 884.92              | 70.69                  | 814.22                 | 3                     | 0.007                  | 0.002         | 0.020         |
|         | LCS16     | 574                | 928.52              | 56.66                  | 871.86                 | 1                     | 0.003                  | 0.000         | 0.020         |
| 3 years | LCS12     | 556                | 1208.55             | 97.92                  | 1110.63                | 4                     | 0.010                  | 0.004         | 0.026         |
|         | LCS16     | 574                | 1278.78             | 73.44                  | 1205.33                | 3                     | 0.008                  | 0.003         | 0.026         |

Note: WY = women years, 1 WY equals to 365 days, CIL = confidence interval limit

Global Biostatistics: /by-sasp/patdb/projects/de04209/310442/stat/prod\_interim03/pgms/i-eff-km-parity.sas sgrpp 27OCT2011 12:53

Table 14.2.1 / 12: Probability of getting pregnant by treatment and parity (Kaplan-Meier analysis) (FAS) (cont.)

Analysis type: unadj.

Parity: 1 birth or more

| Time    | TREATMENT | Number of subjects | Total exposure [WY] | Excluded exposure [WY] | Relevant exposure [WY] | Number of pregnancies | Cumulative probability | lower 95% CIL | upper 95% CIL |
|---------|-----------|--------------------|---------------------|------------------------|------------------------|-----------------------|------------------------|---------------|---------------|
| year 1  | LCS12     | 876                | 790.82              | 19.92                  | 770.90                 | 3                     | 0.004                  | 0.001         | 0.012         |
|         | LCS16     | 878                | 807.86              | 28.47                  | 779.38                 | 2                     | 0.003                  | 0.001         | 0.011         |
| year 2  | LCS12     | 724                | 661.47              | 13.14                  | 648.33                 | 2                     | 0.003                  | 0.001         | 0.012         |
|         | LCS16     | 747                | 685.32              | 16.29                  | 669.03                 | 3                     | 0.004                  | 0.001         | 0.014         |
| year 3  | LCS12     | 606                | 546.79              | 18.03                  | 528.76                 | 1                     | 0.002                  | 0.000         | 0.013         |
|         | LCS16     | 630                | 568.04              | 10.42                  | 557.62                 | 2                     | 0.003                  | 0.001         | 0.013         |
| 2 years | LCS12     | 876                | 1452.29             | 33.06                  | 1419.23                | 5                     | 0.007                  | 0.003         | 0.017         |
|         | LCS16     | 878                | 1493.17             | 44.76                  | 1448.41                | 5                     | 0.007                  | 0.003         | 0.017         |
| 3 years | LCS12     | 876                | 1999.07             | 51.08                  | 1947.99                | 6                     | 0.009                  | 0.004         | 0.019         |
|         | LCS16     | 878                | 2061.21             | 55.19                  | 2006.03                | 7                     | 0.010                  | 0.005         | 0.022         |

Note: WY = women years, 1 WY equals to 365 days, CIL = confidence interval limit

Global Biostatistics: /by-sasp/patdb/projects/de04209/310442/stat/prod\_interim03/pgms/i-eff-km-parity.sas sgrpp 27OCT2011 12:53

Table 14.2.1 / 12: Probability of getting pregnant by treatment and parity (Kaplan-Meier analysis) (FAS) (cont.)

Analysis type: adj.

Parity: 0 births

| Time    | TREATMENT | Number of subjects | Total exposure [WY] | Excluded exposure [WY] | Relevant exposure [WY] | Number of pregnancies | Cumulative probability | lower 95% CIL | upper 95% CIL |
|---------|-----------|--------------------|---------------------|------------------------|------------------------|-----------------------|------------------------|---------------|---------------|
| year 1  | LCS12     | 556                | 485.87              | 42.09                  | 443.78                 | 2                     | 0.004                  | 0.001         | 0.017         |
|         | LCS16     | 574                | 502.21              | 34.22                  | 467.99                 | 0                     | 0.000                  | 0.000         | 0.000         |
| year 2  | LCS12     | 436                | 391.53              | 27.55                  | 363.99                 | 1                     | 0.003                  | 0.000         | 0.018         |
|         | LCS16     | 456                | 416.31              | 21.37                  | 394.93                 | 1                     | 0.003                  | 0.000         | 0.019         |
| year 3  | LCS12     | 351                | 320.55              | 27.04                  | 293.51                 | 1                     | 0.003                  | 0.000         | 0.022         |
|         | LCS16     | 376                | 348.08              | 16.65                  | 331.44                 | 2                     | 0.006                  | 0.001         | 0.023         |
| 2 years | LCS12     | 556                | 877.41              | 69.64                  | 807.77                 | 3                     | 0.007                  | 0.002         | 0.021         |
|         | LCS16     | 574                | 918.52              | 55.60                  | 862.92                 | 1                     | 0.003                  | 0.000         | 0.020         |
| 3 years | LCS12     | 556                | 1197.95             | 96.68                  | 1101.28                | 4                     | 0.010                  | 0.004         | 0.026         |
|         | LCS16     | 574                | 1266.60             | 72.24                  | 1194.36                | 3                     | 0.008                  | 0.003         | 0.026         |

Note: WY = women years, 1 WY equals to 365 days, CIL = confidence interval limit

Global Biostatistics: /by-sasp/patdb/projects/de04209/310442/stat/prod\_interim03/pgms/i-eff-km-parity.sas sgrpp 27OCT2011 12:53

Table 14.2.1 / 12: Probability of getting pregnant by treatment and parity (Kaplan-Meier analysis) (FAS) (cont.)

Analysis type: adj.

Parity: 1 birth or more

| Time    | TREATMENT | Number of subjects | Total exposure [WY] | Excluded exposure [WY] | Relevant exposure [WY] | Number of pregnancies | Cumulative probability | lower 95% CIL | upper 95% CIL |
|---------|-----------|--------------------|---------------------|------------------------|------------------------|-----------------------|------------------------|---------------|---------------|
| year 1  | LCS12     | 876                | 784.55              | 19.50                  | 765.04                 | 3                     | 0.004                  | 0.001         | 0.012         |
|         | LCS16     | 878                | 798.70              | 28.07                  | 770.64                 | 2                     | 0.003                  | 0.001         | 0.011         |
| year 2  | LCS12     | 719                | 657.10              | 12.53                  | 644.57                 | 2                     | 0.003                  | 0.001         | 0.012         |
|         | LCS16     | 742                | 679.32              | 15.90                  | 663.43                 | 3                     | 0.004                  | 0.001         | 0.014         |
| year 3  | LCS12     | 602                | 542.89              | 17.72                  | 525.18                 | 1                     | 0.002                  | 0.000         | 0.013         |
|         | LCS16     | 624                | 563.61              | 10.27                  | 553.35                 | 2                     | 0.003                  | 0.001         | 0.013         |
| 2 years | LCS12     | 876                | 1441.65             | 32.04                  | 1409.61                | 5                     | 0.007                  | 0.003         | 0.017         |
|         | LCS16     | 878                | 1478.03             | 43.96                  | 1434.07                | 5                     | 0.007                  | 0.003         | 0.017         |
| 3 years | LCS12     | 876                | 1984.54             | 49.75                  | 1934.79                | 6                     | 0.009                  | 0.004         | 0.019         |
|         | LCS16     | 878                | 2041.64             | 54.23                  | 1987.41                | 7                     | 0.010                  | 0.005         | 0.022         |

Note: WY = women years, 1 WY equals to 365 days, CIL = confidence interval limit

Global Biostatistics: /by-sasp/patdb/projects/de04209/310442/stat/prod\_interim03/pgms/i-eff-km-parity.sas sgrpp 27OCT2011 12:53

End of table

**Table 14.2.1 / 13: Probability of getting pregnant by treatment and BMI-group (Kaplan-Meier analysis) (FAS)**

Analysis type: unadj.

BMI group: missing

| Time    | TREATMENT | Number of subjects | Total exposure [WY] | Excluded exposure [WY] | Relevant exposure [WY] | Number of pregnancies | Cumulative probability | lower 95% CIL | upper 95% CIL |
|---------|-----------|--------------------|---------------------|------------------------|------------------------|-----------------------|------------------------|---------------|---------------|
| year 1  | LCS12     | 1                  | 1.00                | 0.08                   | 0.92                   | 0                     | 0.000                  | 0.000         | 0.000         |
|         | LCS16     | 4                  | 3.57                | 0.02                   | 3.55                   | 0                     | 0.000                  | 0.000         | 0.000         |
| year 2  | LCS12     | 1                  | 1.00                | 0.00                   | 1.00                   | 0                     | 0.000                  | 0.000         | 0.000         |
|         | LCS16     | 3                  | 2.59                | 0.00                   | 2.59                   | 0                     | 0.000                  | 0.000         | 0.000         |
| year 3  | LCS12     | 1                  | 0.07                | 0.02                   | 0.05                   | 0                     | 0.000                  | 0.000         | 0.000         |
|         | LCS16     | 2                  | 1.99                | 0.00                   | 1.99                   | 0                     | 0.000                  | 0.000         | 0.000         |
| 2 years | LCS12     | 1                  | 2.00                | 0.08                   | 1.92                   | 0                     | 0.000                  | 0.000         | 0.000         |
|         | LCS16     | 4                  | 6.16                | 0.02                   | 6.15                   | 0                     | 0.000                  | 0.000         | 0.000         |
| 3 years | LCS12     | 1                  | 2.07                | 0.10                   | 1.96                   | 0                     | 0.000                  | 0.000         | 0.000         |
|         | LCS16     | 4                  | 8.15                | 0.02                   | 8.13                   | 0                     | 0.000                  | 0.000         | 0.000         |

Note: WY = women years, 1 WY equals to 365 days, CIL = confidence interval limit

Global Biostatistics: /by-sasp/patdb/projects/de04209/310442/stat/prod\_interim03/pgms/i-eff-km-bmi.sas sgrpp 27OCT2011 12:53

Table 14.2.1 / 13: Probability of getting pregnant by treatment and BMI-group (Kaplan-Meier analysis) (FAS) (cont.)

Analysis type: unadj.

BMI group: &lt; 30 kg/m2

| Time    | TREATMENT | Number of subjects | Total exposure [WY] | Excluded exposure [WY] | Relevant exposure [WY] | Number of pregnancies | Cumulative probability | lower 95% CIL | upper 95% CIL |
|---------|-----------|--------------------|---------------------|------------------------|------------------------|-----------------------|------------------------|---------------|---------------|
| year 1  | LCS12     | 1187               | 1059.53             | 49.80                  | 1009.73                | 4                     | 0.004                  | 0.001         | 0.010         |
|         | LCS16     | 1198               | 1090.09             | 51.99                  | 1038.10                | 1                     | 0.001                  | 0.000         | 0.008         |
| year 2  | LCS12     | 960                | 879.05              | 30.98                  | 848.07                 | 3                     | 0.003                  | 0.001         | 0.011         |
|         | LCS16     | 1000               | 917.49              | 31.77                  | 885.72                 | 2                     | 0.002                  | 0.001         | 0.009         |
| year 3  | LCS12     | 801                | 727.47              | 37.96                  | 689.51                 | 2                     | 0.003                  | 0.001         | 0.011         |
|         | LCS16     | 840                | 764.71              | 23.71                  | 741.01                 | 3                     | 0.004                  | 0.001         | 0.012         |
| 2 years | LCS12     | 1187               | 1938.58             | 80.77                  | 1857.81                | 7                     | 0.007                  | 0.003         | 0.015         |
|         | LCS16     | 1198               | 2007.58             | 83.76                  | 1923.81                | 3                     | 0.003                  | 0.001         | 0.010         |
| 3 years | LCS12     | 1187               | 2666.05             | 118.73                 | 2547.32                | 9                     | 0.010                  | 0.005         | 0.019         |
|         | LCS16     | 1198               | 2772.29             | 107.47                 | 2664.82                | 6                     | 0.007                  | 0.003         | 0.016         |

Note: WY = women years, 1 WY equals to 365 days, CIL = confidence interval limit

Global Biostatistics: /by-sasp/patdb/projects/de04209/310442/stat/prod\_interim03/pgms/i-eff-km-bmi.sas sgrpp 27OCT2011 12:53

Table 14.2.1 / 13: Probability of getting pregnant by treatment and BMI-group (Kaplan-Meier analysis) (FAS) (cont.)

Analysis type: unadj.

BMI group: &gt;= 30 kg/m2

| Time    | TREATMENT | Number of subjects | Total exposure [WY] | Excluded exposure [WY] | Relevant exposure [WY] | Number of pregnancies | Cumulative probability | lower 95% CIL | upper 95% CIL |
|---------|-----------|--------------------|---------------------|------------------------|------------------------|-----------------------|------------------------|---------------|---------------|
| year 1  | LCS12     | 244                | 219.69              | 12.56                  | 207.13                 | 1                     | 0.005                  | 0.001         | 0.034         |
|         | LCS16     | 250                | 222.71              | 11.58                  | 211.13                 | 1                     | 0.005                  | 0.001         | 0.037         |
| year 2  | LCS12     | 201                | 176.93              | 10.33                  | 166.60                 | 0                     | 0.000                  | 0.000         | 0.000         |
|         | LCS16     | 203                | 185.24              | 6.06                   | 179.18                 | 2                     | 0.010                  | 0.003         | 0.041         |
| year 3  | LCS12     | 158                | 142.88              | 7.27                   | 135.61                 | 0                     | 0.000                  | 0.000         | 0.000         |
|         | LCS16     | 168                | 151.60              | 3.50                   | 148.10                 | 1                     | 0.006                  | 0.001         | 0.044         |
| 2 years | LCS12     | 244                | 396.62              | 22.89                  | 373.73                 | 1                     | 0.005                  | 0.001         | 0.033         |
|         | LCS16     | 250                | 407.95              | 17.64                  | 390.31                 | 3                     | 0.015                  | 0.005         | 0.047         |
| 3 years | LCS12     | 244                | 539.51              | 30.16                  | 509.34                 | 1                     | 0.005                  | 0.001         | 0.033         |
|         | LCS16     | 250                | 559.55              | 21.14                  | 538.41                 | 4                     | 0.022                  | 0.008         | 0.057         |

Note: WY = women years, 1 WY equals to 365 days, CIL = confidence interval limit

Global Biostatistics: /by-sasp/patdb/projects/de04209/310442/stat/prod\_interim03/pgms/i-eff-km-bmi.sas sgrpp 27OCT2011 12:53



Table 14.2.1 / 13: Probability of getting pregnant by treatment and BMI-group (Kaplan-Meier analysis) (FAS) (cont.)

Analysis type: adj.

BMI group: missing

| Time    | TREATMENT | Number of subjects | Total exposure [WY] | Excluded exposure [WY] | Relevant exposure [WY] | Number of pregnancies | Cumulative probability | lower 95% CIL | upper 95% CIL |
|---------|-----------|--------------------|---------------------|------------------------|------------------------|-----------------------|------------------------|---------------|---------------|
| year 1  | LCS12     | 1                  | 1.00                | 0.08                   | 0.92                   | 0                     | 0.000                  | 0.000         | 0.000         |
|         | LCS16     | 4                  | 3.57                | 0.02                   | 3.55                   | 0                     | 0.000                  | 0.000         | 0.000         |
| year 2  | LCS12     | 1                  | 1.00                | 0.00                   | 1.00                   | 0                     | 0.000                  | 0.000         | 0.000         |
|         | LCS16     | 3                  | 2.59                | 0.00                   | 2.59                   | 0                     | 0.000                  | 0.000         | 0.000         |
| year 3  | LCS12     | 1                  | 0.07                | 0.02                   | 0.05                   | 0                     | 0.000                  | 0.000         | 0.000         |
|         | LCS16     | 2                  | 1.99                | 0.00                   | 1.99                   | 0                     | 0.000                  | 0.000         | 0.000         |
| 2 years | LCS12     | 1                  | 2.00                | 0.08                   | 1.92                   | 0                     | 0.000                  | 0.000         | 0.000         |
|         | LCS16     | 4                  | 6.16                | 0.02                   | 6.15                   | 0                     | 0.000                  | 0.000         | 0.000         |
| 3 years | LCS12     | 1                  | 2.07                | 0.10                   | 1.96                   | 0                     | 0.000                  | 0.000         | 0.000         |
|         | LCS16     | 4                  | 8.15                | 0.02                   | 8.13                   | 0                     | 0.000                  | 0.000         | 0.000         |

Note: WY = women years, 1 WY equals to 365 days, CIL = confidence interval limit

Global Biostatistics: /by-sasp/patdb/projects/de04209/310442/stat/prod\_interim03/pgms/i-eff-km-bmi.sas sgrpp 27OCT2011 12:53

Table 14.2.1 / 13: Probability of getting pregnant by treatment and BMI-group (Kaplan-Meier analysis) (FAS) (cont.)

Analysis type: adj.

BMI group: &lt; 30 kg/m2

| Time    | TREATMENT | Number of subjects | Total exposure [WY] | Excluded exposure [WY] | Relevant exposure [WY] | Number of pregnancies | Cumulative probability | lower 95% CIL | upper 95% CIL |
|---------|-----------|--------------------|---------------------|------------------------|------------------------|-----------------------|------------------------|---------------|---------------|
| year 1  | LCS12     | 1187               | 1052.56             | 49.17                  | 1003.39                | 4                     | 0.004                  | 0.001         | 0.010         |
|         | LCS16     | 1198               | 1079.20             | 51.15                  | 1028.05                | 1                     | 0.001                  | 0.000         | 0.008         |
| year 2  | LCS12     | 955                | 870.88              | 29.78                  | 841.09                 | 3                     | 0.003                  | 0.001         | 0.011         |
|         | LCS16     | 994                | 909.24              | 31.26                  | 877.98                 | 2                     | 0.002                  | 0.001         | 0.010         |
| year 3  | LCS12     | 794                | 721.39              | 37.50                  | 683.89                 | 2                     | 0.003                  | 0.001         | 0.011         |
|         | LCS16     | 831                | 759.48              | 23.44                  | 736.05                 | 3                     | 0.004                  | 0.001         | 0.012         |
| 2 years | LCS12     | 1187               | 1923.44             | 78.95                  | 1844.48                | 7                     | 0.007                  | 0.003         | 0.015         |
|         | LCS16     | 1198               | 1988.44             | 82.41                  | 1906.03                | 3                     | 0.003                  | 0.001         | 0.011         |
| 3 years | LCS12     | 1187               | 2644.82             | 116.45                 | 2528.38                | 9                     | 0.010                  | 0.005         | 0.019         |
|         | LCS16     | 1198               | 2747.92             | 105.84                 | 2642.08                | 6                     | 0.007                  | 0.003         | 0.016         |

Note: WY = women years, 1 WY equals to 365 days, CIL = confidence interval limit

Global Biostatistics: /by-sasp/patdb/projects/de04209/310442/stat/prod\_interim03/pgms/i-eff-km-bmi.sas sgrpp 27OCT2011 12:53

Table 14.2.1 / 13: Probability of getting pregnant by treatment and BMI-group (Kaplan-Meier analysis) (FAS) (cont.)

Analysis type: adj.

BMI group: &gt;= 30 kg/m2

| Time    | TREATMENT | Number of subjects | Total exposure [WY] | Excluded exposure [WY] | Relevant exposure [WY] | Number of pregnancies | Cumulative probability | lower 95% CIL | upper 95% CIL |
|---------|-----------|--------------------|---------------------|------------------------|------------------------|-----------------------|------------------------|---------------|---------------|
| year 1  | LCS12     | 244                | 216.86              | 12.34                  | 204.52                 | 1                     | 0.005                  | 0.001         | 0.034         |
|         | LCS16     | 250                | 218.15              | 11.13                  | 207.02                 | 1                     | 0.005                  | 0.001         | 0.037         |
| year 2  | LCS12     | 199                | 176.76              | 10.30                  | 166.47                 | 0                     | 0.000                  | 0.000         | 0.000         |
|         | LCS16     | 201                | 183.80              | 6.01                   | 177.79                 | 2                     | 0.010                  | 0.003         | 0.041         |
| year 3  | LCS12     | 158                | 141.98              | 7.24                   | 134.74                 | 0                     | 0.000                  | 0.000         | 0.000         |
|         | LCS16     | 167                | 150.23              | 3.48                   | 146.75                 | 1                     | 0.006                  | 0.001         | 0.044         |
| 2 years | LCS12     | 244                | 393.62              | 22.64                  | 370.99                 | 1                     | 0.005                  | 0.001         | 0.033         |
|         | LCS16     | 250                | 401.95              | 17.13                  | 384.81                 | 3                     | 0.016                  | 0.005         | 0.048         |
| 3 years | LCS12     | 244                | 535.61              | 29.88                  | 505.73                 | 1                     | 0.005                  | 0.001         | 0.033         |
|         | LCS16     | 250                | 552.17              | 20.61                  | 531.56                 | 4                     | 0.022                  | 0.008         | 0.058         |

Note: WY = women years, 1 WY equals to 365 days, CIL = confidence interval limit

Global Biostatistics: /by-sasp/patdb/projects/de04209/310442/stat/prod\_interim03/pgms/i-eff-km-bmi.sas sgrpp 27OCT2011 12:53

End of table

**Table 14.2.1 / 14: Probability of getting pregnant (ectopic pregnancies) by treatment (Kaplan-Meier analysis) (FAS)**

Analysis type: unadj.

| Time    | TREATMENT | Number of subjects | Total exposure [WY] | Excluded exposure [WY] | Relevant exposure [WY] | Number of pregnancies | Cumulative probability | lower 95% CIL | upper 95% CIL |
|---------|-----------|--------------------|---------------------|------------------------|------------------------|-----------------------|------------------------|---------------|---------------|
| year 1  | LCS12     | 1432               | 1280.22             | 62.44                  | 1217.78                | 2                     | 0.002                  | 0.000         | 0.006         |
|         | LCS16     | 1452               | 1316.37             | 63.59                  | 1252.78                | 2                     | 0.002                  | 0.000         | 0.007         |
| year 2  | LCS12     | 1162               | 1056.98             | 41.31                  | 1015.67                | 1                     | 0.001                  | 0.000         | 0.007         |
|         | LCS16     | 1206               | 1105.32             | 37.83                  | 1067.49                | 3                     | 0.003                  | 0.001         | 0.009         |
| year 3  | LCS12     | 960                | 870.42              | 45.25                  | 825.17                 | 0                     | 0.000                  | 0.000         | 0.000         |
|         | LCS16     | 1010               | 918.30              | 27.21                  | 891.09                 | 2                     | 0.002                  | 0.001         | 0.009         |
| 2 years | LCS12     | 1432               | 2337.20             | 103.75                 | 2233.45                | 3                     | 0.002                  | 0.001         | 0.008         |
|         | LCS16     | 1452               | 2421.69             | 101.42                 | 2320.27                | 5                     | 0.004                  | 0.002         | 0.011         |
| 3 years | LCS12     | 1432               | 3207.62             | 149.00                 | 3058.62                | 3                     | 0.002                  | 0.001         | 0.008         |
|         | LCS16     | 1452               | 3339.99             | 128.63                 | 3211.36                | 7                     | 0.007                  | 0.003         | 0.014         |

Note: WY = women years, 1 WY equals to 365 days, CIL = confidence interval limit

Global Biostatistics: /by-sasp/patdb/projects/de04209/310442/stat/prod\_interim03/pgms/i-eff-km-ect-all.sas sgrpp 27OCT2011 12:53

**Table 14.2.1 / 14: Probability of getting pregnant (ectopic pregnancies) by treatment (Kaplan-Meier analysis) (FAS)**  
 (cont.)

Analysis type: adj.

| Time    | TREATMENT | Number of subjects | Total exposure [WY] | Excluded exposure [WY] | Relevant exposure [WY] | Number of pregnancies | Cumulative probability | lower 95% CIL | upper 95% CIL |
|---------|-----------|--------------------|---------------------|------------------------|------------------------|-----------------------|------------------------|---------------|---------------|
| year 1  | LCS12     | 1432               | 1270.42             | 61.59                  | 1208.82                | 2                     | 0.002                  | 0.000         | 0.006         |
|         | LCS16     | 1452               | 1300.92             | 62.29                  | 1238.62                | 2                     | 0.002                  | 0.000         | 0.007         |
| year 2  | LCS12     | 1155               | 1048.64             | 40.08                  | 1008.56                | 1                     | 0.001                  | 0.000         | 0.007         |
|         | LCS16     | 1198               | 1095.63             | 37.27                  | 1058.36                | 3                     | 0.003                  | 0.001         | 0.009         |
| year 3  | LCS12     | 953                | 863.44              | 44.76                  | 818.68                 | 0                     | 0.000                  | 0.000         | 0.000         |
|         | LCS16     | 1000               | 911.70              | 26.92                  | 884.78                 | 2                     | 0.002                  | 0.001         | 0.009         |
| 2 years | LCS12     | 1432               | 2319.06             | 101.67                 | 2217.38                | 3                     | 0.003                  | 0.001         | 0.008         |
|         | LCS16     | 1452               | 2396.55             | 99.56                  | 2296.99                | 5                     | 0.005                  | 0.002         | 0.011         |
| 3 years | LCS12     | 1432               | 3182.50             | 146.43                 | 3036.07                | 3                     | 0.002                  | 0.001         | 0.008         |
|         | LCS16     | 1452               | 3308.24             | 126.47                 | 3181.77                | 7                     | 0.007                  | 0.003         | 0.014         |

Note: WY = women years, 1 WY equals to 365 days, CIL = confidence interval limit

Global Biostatistics: /by-sasp/patdb/projects/de04209/310442/stat/prod\_interim03/pgms/i-eff-km-ect-all.sas sgrpp 27OCT2011 12:53

End of table

**Table 14.2.1 / 15: Probability of getting pregnant (ectopic pregnancies) by treatment and age-group (Kaplan-Meier analysis) (FAS)**

Analysis type: unadj.

Age category: age &lt;= 25

| Time    | TREATMENT | Number of subjects | Total exposure [WY] | Excluded exposure [WY] | Relevant exposure [WY] | Number of pregnancies | Cumulative probability | lower 95% CIL | upper 95% CIL |
|---------|-----------|--------------------|---------------------|------------------------|------------------------|-----------------------|------------------------|---------------|---------------|
| year 1  | LCS12     | 566                | 491.49              | 35.87                  | 455.62                 | 1                     | 0.002                  | 0.000         | 0.013         |
|         | LCS16     | 564                | 508.48              | 35.16                  | 473.33                 | 1                     | 0.002                  | 0.000         | 0.018         |
| year 2  | LCS12     | 435                | 392.29              | 24.00                  | 368.29                 | 1                     | 0.002                  | 0.000         | 0.018         |
|         | LCS16     | 461                | 423.65              | 23.01                  | 400.65                 | 0                     | 0.000                  | 0.000         | 0.000         |
| year 3  | LCS12     | 354                | 315.24              | 24.95                  | 290.30                 | 0                     | 0.000                  | 0.000         | 0.000         |
|         | LCS16     | 383                | 347.48              | 14.27                  | 333.21                 | 1                     | 0.003                  | 0.000         | 0.019         |
| 2 years | LCS12     | 566                | 883.78              | 59.87                  | 823.92                 | 2                     | 0.004                  | 0.001         | 0.018         |
|         | LCS16     | 564                | 932.14              | 58.16                  | 873.98                 | 1                     | 0.002                  | 0.000         | 0.015         |
| 3 years | LCS12     | 566                | 1199.03             | 84.82                  | 1114.21                | 2                     | 0.004                  | 0.001         | 0.018         |
|         | LCS16     | 564                | 1279.62             | 72.43                  | 1207.19                | 2                     | 0.005                  | 0.001         | 0.019         |

Note: WY = women years, 1 WY equals to 365 days, CIL = confidence interval limit

Global Biostatistics: /by-sasp/patdb/projects/de04209/310442/stat/prod\_interim03/pgms/i-eff-km-ect-age.sas sgrpp 27OCT2011 12:54

Table 14.2.1 / 15: Probability of getting pregnant (ectopic pregnancies) by treatment and age-group (Kaplan-Meier analysis) (FAS) (cont.)

Analysis type: unadj.

Age category: 25 < age <= 35

| Time    | TREATMENT | Number of subjects | Total exposure [WY] | Excluded exposure [WY] | Relevant exposure [WY] | Number of pregnancies | Cumulative probability | lower 95% CIL | upper 95% CIL |
|---------|-----------|--------------------|---------------------|------------------------|------------------------|-----------------------|------------------------|---------------|---------------|
| year 1  | LCS12     | 866                | 788.73              | 26.57                  | 762.15                 | 1                     | 0.001                  | 0.000         | 0.010         |
|         | LCS16     | 888                | 807.88              | 28.43                  | 779.45                 | 1                     | 0.001                  | 0.000         | 0.010         |
| year 2  | LCS12     | 727                | 664.69              | 17.31                  | 647.38                 | 0                     | 0.000                  | 0.000         | 0.000         |
|         | LCS16     | 745                | 681.67              | 14.82                  | 666.84                 | 3                     | 0.005                  | 0.001         | 0.014         |
| year 3  | LCS12     | 606                | 555.18              | 20.30                  | 534.87                 | 0                     | 0.000                  | 0.000         | 0.000         |
|         | LCS16     | 627                | 570.82              | 12.94                  | 557.88                 | 1                     | 0.002                  | 0.000         | 0.013         |
| 2 years | LCS12     | 866                | 1453.42             | 43.88                  | 1409.54                | 1                     | 0.001                  | 0.000         | 0.009         |
|         | LCS16     | 888                | 1489.55             | 43.26                  | 1446.29                | 4                     | 0.006                  | 0.002         | 0.016         |
| 3 years | LCS12     | 866                | 2008.59             | 64.18                  | 1944.41                | 1                     | 0.001                  | 0.000         | 0.009         |
|         | LCS16     | 888                | 2060.37             | 56.19                  | 2004.17                | 5                     | 0.008                  | 0.003         | 0.018         |

Note: WY = women years, 1 WY equals to 365 days, CIL = confidence interval limit

Global Biostatistics: /by-sasp/patdb/projects/de04209/310442/stat/prod\_interim03/pgms/i-eff-km-ect-age.sas sgrpp 27OCT2011 12:54

Table 14.2.1 / 15: Probability of getting pregnant (ectopic pregnancies) by treatment and age-group (Kaplan-Meier analysis) (FAS) (cont.)

Analysis type: adj.

Age category: age <= 25

| Time    | TREATMENT | Number of subjects | Total exposure [WY] | Excluded exposure [WY] | Relevant exposure [WY] | Number of pregnancies | Cumulative probability | lower 95% CIL | upper 95% CIL |
|---------|-----------|--------------------|---------------------|------------------------|------------------------|-----------------------|------------------------|---------------|---------------|
| year 1  | LCS12     | 566                | 486.04              | 35.47                  | 450.56                 | 1                     | 0.002                  | 0.000         | 0.014         |
|         | LCS16     | 564                | 502.10              | 34.24                  | 467.86                 | 1                     | 0.003                  | 0.000         | 0.018         |
| year 2  | LCS12     | 432                | 388.32              | 23.35                  | 364.97                 | 1                     | 0.003                  | 0.000         | 0.018         |
|         | LCS16     | 458                | 417.98              | 22.70                  | 395.28                 | 0                     | 0.000                  | 0.000         | 0.000         |
| year 3  | LCS12     | 349                | 311.81              | 24.72                  | 287.09                 | 0                     | 0.000                  | 0.000         | 0.000         |
|         | LCS16     | 378                | 344.44              | 14.13                  | 330.32                 | 1                     | 0.003                  | 0.000         | 0.019         |
| 2 years | LCS12     | 566                | 874.36              | 58.83                  | 815.53                 | 2                     | 0.004                  | 0.001         | 0.018         |
|         | LCS16     | 564                | 920.07              | 56.93                  | 863.14                 | 1                     | 0.002                  | 0.000         | 0.015         |
| 3 years | LCS12     | 566                | 1186.17             | 83.55                  | 1102.62                | 2                     | 0.004                  | 0.001         | 0.018         |
|         | LCS16     | 564                | 1264.52             | 71.06                  | 1193.45                | 2                     | 0.005                  | 0.001         | 0.020         |

Note: WY = women years, 1 WY equals to 365 days, CIL = confidence interval limit

Global Biostatistics: /by-sasp/patdb/projects/de04209/310442/stat/prod\_interim03/pgms/i-eff-km-ect-age.sas sgrpp 27OCT2011 12:54



**Table 14.2.1 / 15: Probability of getting pregnant (ectopic pregnancies) by treatment and age-group (Kaplan-Meier analysis) (FAS) (cont.)**

Analysis type: adj.

Age category: 25 &lt; age &lt;= 35

| Time    | TREATMENT | Number of subjects | Total exposure [WY] | Excluded exposure [WY] | Relevant exposure [WY] | Number of pregnancies | Cumulative probability | lower 95% CIL | upper 95% CIL |
|---------|-----------|--------------------|---------------------|------------------------|------------------------|-----------------------|------------------------|---------------|---------------|
| year 1  | LCS12     | 866                | 784.38              | 26.12                  | 758.26                 | 1                     | 0.001                  | 0.000         | 0.010         |
|         | LCS16     | 888                | 798.82              | 28.05                  | 770.76                 | 1                     | 0.001                  | 0.000         | 0.010         |
| year 2  | LCS12     | 723                | 660.32              | 16.73                  | 643.59                 | 0                     | 0.000                  | 0.000         | 0.000         |
|         | LCS16     | 740                | 677.65              | 14.57                  | 663.08                 | 3                     | 0.005                  | 0.001         | 0.014         |
| year 3  | LCS12     | 604                | 551.63              | 20.04                  | 531.59                 | 0                     | 0.000                  | 0.000         | 0.000         |
|         | LCS16     | 622                | 567.25              | 12.79                  | 554.47                 | 1                     | 0.002                  | 0.000         | 0.013         |
| 2 years | LCS12     | 866                | 1444.70             | 42.85                  | 1401.85                | 1                     | 0.001                  | 0.000         | 0.009         |
|         | LCS16     | 888                | 1476.47             | 42.62                  | 1433.85                | 4                     | 0.006                  | 0.002         | 0.016         |
| 3 years | LCS12     | 866                | 1996.33             | 62.88                  | 1933.44                | 1                     | 0.001                  | 0.000         | 0.009         |
|         | LCS16     | 888                | 2043.73             | 55.41                  | 1988.31                | 5                     | 0.008                  | 0.003         | 0.018         |

Note: WY = women years, 1 WY equals to 365 days, CIL = confidence interval limit

Global Biostatistics: /by-sasp/patdb/projects/de04209/310442/stat/prod\_interim03/pgms/i-eff-km-ect-age.sas sgrpp 27OCT2011 12:54

End of table

**Table 14.2.1 / 16: Probability of getting pregnant (ectopic pregnancies) by treatment and parity (Kaplan-Meier analysis) (FAS)**

Analysis type: unadj.

Parity: 0 births

| Time    | TREATMENT | Number of subjects | Total exposure [WY] | Excluded exposure [WY] | Relevant exposure [WY] | Number of pregnancies | Cumulative probability | lower 95% CIL | upper 95% CIL |
|---------|-----------|--------------------|---------------------|------------------------|------------------------|-----------------------|------------------------|---------------|---------------|
| year 1  | LCS12     | 556                | 489.40              | 42.52                  | 446.88                 | 1                     | 0.002                  | 0.000         | 0.014         |
|         | LCS16     | 574                | 508.51              | 35.12                  | 473.39                 | 0                     | 0.000                  | 0.000         | 0.000         |
| year 2  | LCS12     | 438                | 395.52              | 28.17                  | 367.34                 | 1                     | 0.003                  | 0.000         | 0.018         |
|         | LCS16     | 459                | 420.01              | 21.54                  | 398.47                 | 1                     | 0.003                  | 0.000         | 0.018         |
| year 3  | LCS12     | 354                | 323.63              | 27.22                  | 296.41                 | 0                     | 0.000                  | 0.000         | 0.000         |
|         | LCS16     | 380                | 350.26              | 16.78                  | 333.48                 | 2                     | 0.006                  | 0.001         | 0.023         |
| 2 years | LCS12     | 556                | 884.92              | 70.69                  | 814.22                 | 2                     | 0.004                  | 0.001         | 0.018         |
|         | LCS16     | 574                | 928.52              | 56.66                  | 871.86                 | 1                     | 0.003                  | 0.000         | 0.020         |
| 3 years | LCS12     | 556                | 1208.55             | 97.92                  | 1110.63                | 2                     | 0.004                  | 0.001         | 0.018         |
|         | LCS16     | 574                | 1278.78             | 73.44                  | 1205.33                | 3                     | 0.008                  | 0.003         | 0.026         |

Note: WY = women years, 1 WY equals to 365 days, CIL = confidence interval limit

GB: /by-sasp/patdb/projects/de04209/310442/stat/prod\_interim03/pgms/i-eff-km-ect-parity.sas sgrpp 27OCT2011 12:54

Table 14.2.1 / 16: Probability of getting pregnant (ectopic pregnancies) by treatment and parity (Kaplan-Meier analysis) (FAS) (cont.)

 Analysis type: unadj.  
 Parity: 1 birth or more

| Time    | TREATMENT | Number of subjects | Total exposure [WY] | Excluded exposure [WY] | Relevant exposure [WY] | Number of pregnancies | Cumulative probability | lower 95% CIL | upper 95% CIL |
|---------|-----------|--------------------|---------------------|------------------------|------------------------|-----------------------|------------------------|---------------|---------------|
| year 1  | LCS12     | 876                | 790.82              | 19.92                  | 770.90                 | 1                     | 0.001                  | 0.000         | 0.009         |
|         | LCS16     | 878                | 807.86              | 28.47                  | 779.38                 | 2                     | 0.003                  | 0.001         | 0.011         |
| year 2  | LCS12     | 724                | 661.47              | 13.14                  | 648.33                 | 0                     | 0.000                  | 0.000         | 0.000         |
|         | LCS16     | 747                | 685.32              | 16.29                  | 669.03                 | 2                     | 0.003                  | 0.001         | 0.012         |
| year 3  | LCS12     | 606                | 546.79              | 18.03                  | 528.76                 | 0                     | 0.000                  | 0.000         | 0.000         |
|         | LCS16     | 630                | 568.04              | 10.42                  | 557.62                 | 0                     | 0.000                  | 0.000         | 0.000         |
| 2 years | LCS12     | 876                | 1452.29             | 33.06                  | 1419.23                | 1                     | 0.001                  | 0.000         | 0.009         |
|         | LCS16     | 878                | 1493.17             | 44.76                  | 1448.41                | 4                     | 0.006                  | 0.002         | 0.015         |
| 3 years | LCS12     | 876                | 1999.07             | 51.08                  | 1947.99                | 1                     | 0.001                  | 0.000         | 0.009         |
|         | LCS16     | 878                | 2061.21             | 55.19                  | 2006.03                | 4                     | 0.005                  | 0.002         | 0.015         |

Note: WY = women years, 1 WY equals to 365 days, CIL = confidence interval limit

GB: /by-sasp/patdb/projects/de04209/310442/stat/prod\_interim03/pgms/i-eff-km-ect-parity.sas sgrpp 27OCT2011 12:54

Table 14.2.1 / 16: Probability of getting pregnant (ectopic pregnancies) by treatment and parity (Kaplan-Meier analysis) (FAS) (cont.)

Analysis type: adj.

Parity: 0 births

| Time    | TREATMENT | Number of subjects | Total exposure [WY] | Excluded exposure [WY] | Relevant exposure [WY] | Number of pregnancies | Cumulative probability | lower 95% CIL | upper 95% CIL |
|---------|-----------|--------------------|---------------------|------------------------|------------------------|-----------------------|------------------------|---------------|---------------|
| year 1  | LCS12     | 556                | 485.87              | 42.09                  | 443.78                 | 1                     | 0.002                  | 0.000         | 0.014         |
|         | LCS16     | 574                | 502.21              | 34.22                  | 467.99                 | 0                     | 0.000                  | 0.000         | 0.000         |
| year 2  | LCS12     | 436                | 391.53              | 27.55                  | 363.99                 | 1                     | 0.003                  | 0.000         | 0.018         |
|         | LCS16     | 456                | 416.31              | 21.37                  | 394.93                 | 1                     | 0.003                  | 0.000         | 0.019         |
| year 3  | LCS12     | 351                | 320.55              | 27.04                  | 293.51                 | 0                     | 0.000                  | 0.000         | 0.000         |
|         | LCS16     | 376                | 348.08              | 16.65                  | 331.44                 | 2                     | 0.006                  | 0.001         | 0.023         |
| 2 years | LCS12     | 556                | 877.41              | 69.64                  | 807.77                 | 2                     | 0.005                  | 0.001         | 0.018         |
|         | LCS16     | 574                | 918.52              | 55.60                  | 862.92                 | 1                     | 0.003                  | 0.000         | 0.020         |
| 3 years | LCS12     | 556                | 1197.95             | 96.68                  | 1101.28                | 2                     | 0.004                  | 0.001         | 0.018         |
|         | LCS16     | 574                | 1266.60             | 72.24                  | 1194.36                | 3                     | 0.008                  | 0.003         | 0.026         |

Note: WY = women years, 1 WY equals to 365 days, CIL = confidence interval limit

GB: /by-sasp/patdb/projects/de04209/310442/stat/prod\_interim03/pgms/i-eff-km-ect-parity.sas sgrpp 27OCT2011 12:54

Table 14.2.1 / 16: Probability of getting pregnant (ectopic pregnancies) by treatment and parity (Kaplan-Meier analysis) (FAS) (cont.)

Analysis type: adj.

Parity: 1 birth or more

| Time    | TREATMENT | Number of subjects | Total exposure [WY] | Excluded exposure [WY] | Relevant exposure [WY] | Number of pregnancies | Cumulative probability | lower 95% CIL | upper 95% CIL |
|---------|-----------|--------------------|---------------------|------------------------|------------------------|-----------------------|------------------------|---------------|---------------|
| year 1  | LCS12     | 876                | 784.55              | 19.50                  | 765.04                 | 1                     | 0.001                  | 0.000         | 0.010         |
|         | LCS16     | 878                | 798.70              | 28.07                  | 770.64                 | 2                     | 0.003                  | 0.001         | 0.011         |
| year 2  | LCS12     | 719                | 657.10              | 12.53                  | 644.57                 | 0                     | 0.000                  | 0.000         | 0.000         |
|         | LCS16     | 742                | 679.32              | 15.90                  | 663.43                 | 2                     | 0.003                  | 0.001         | 0.012         |
| year 3  | LCS12     | 602                | 542.89              | 17.72                  | 525.18                 | 0                     | 0.000                  | 0.000         | 0.000         |
|         | LCS16     | 624                | 563.61              | 10.27                  | 553.35                 | 0                     | 0.000                  | 0.000         | 0.000         |
| 2 years | LCS12     | 876                | 1441.65             | 32.04                  | 1409.61                | 1                     | 0.001                  | 0.000         | 0.009         |
|         | LCS16     | 878                | 1478.03             | 43.96                  | 1434.07                | 4                     | 0.006                  | 0.002         | 0.015         |
| 3 years | LCS12     | 876                | 1984.54             | 49.75                  | 1934.79                | 1                     | 0.001                  | 0.000         | 0.009         |
|         | LCS16     | 878                | 2041.64             | 54.23                  | 1987.41                | 4                     | 0.006                  | 0.002         | 0.015         |

Note: WY = women years, 1 WY equals to 365 days, CIL = confidence interval limit

GB: /by-sasp/patdb/projects/de04209/310442/stat/prod\_interim03/pgms/i-eff-km-ect-parity.sas sgrpp 27OCT2011 12:54

End of table

**Table 14.2.1 / 17: Probability of getting pregnant (ectopic pregnancies) by treatment and BMI-group (Kaplan-Meier analysis) (FAS)**

 Analysis type: unadj.  
 BMI group: missing

| Time    | TREATMENT | Number of subjects | Total exposure [WY] | Excluded exposure [WY] | Relevant exposure [WY] | Number of pregnancies | Cumulative probability | lower 95% CIL | upper 95% CIL |
|---------|-----------|--------------------|---------------------|------------------------|------------------------|-----------------------|------------------------|---------------|---------------|
| year 1  | LCS12     | 1                  | 1.00                | 0.08                   | 0.92                   | 0                     | 0.000                  | 0.000         | 0.000         |
|         | LCS16     | 4                  | 3.57                | 0.02                   | 3.55                   | 0                     | 0.000                  | 0.000         | 0.000         |
| year 2  | LCS12     | 1                  | 1.00                | 0.00                   | 1.00                   | 0                     | 0.000                  | 0.000         | 0.000         |
|         | LCS16     | 3                  | 2.59                | 0.00                   | 2.59                   | 0                     | 0.000                  | 0.000         | 0.000         |
| year 3  | LCS12     | 1                  | 0.07                | 0.02                   | 0.05                   | 0                     | 0.000                  | 0.000         | 0.000         |
|         | LCS16     | 2                  | 1.99                | 0.00                   | 1.99                   | 0                     | 0.000                  | 0.000         | 0.000         |
| 2 years | LCS12     | 1                  | 2.00                | 0.08                   | 1.92                   | 0                     | 0.000                  | 0.000         | 0.000         |
|         | LCS16     | 4                  | 6.16                | 0.02                   | 6.15                   | 0                     | 0.000                  | 0.000         | 0.000         |
| 3 years | LCS12     | 1                  | 2.07                | 0.10                   | 1.96                   | 0                     | 0.000                  | 0.000         | 0.000         |
|         | LCS16     | 4                  | 8.15                | 0.02                   | 8.13                   | 0                     | 0.000                  | 0.000         | 0.000         |

Note: WY = women years, 1 WY equals to 365 days, CIL = confidence interval limit

Global Biostatistics: /by-sasp/patdb/projects/de04209/310442/stat/prod\_interim03/pgms/i-eff-km-ect-bmi.sas sgrpp 27OCT2011 12:54

Table 14.2.1 / 17: Probability of getting pregnant (ectopic pregnancies) by treatment and BMI-group (Kaplan-Meier analysis) (FAS) (cont.)

Analysis type: unadj.

BMI group: &lt; 30 kg/m2

| Time    | TREATMENT | Number of subjects | Total exposure [WY] | Excluded exposure [WY] | Relevant exposure [WY] | Number of pregnancies | Cumulative probability | lower 95% CIL | upper 95% CIL |
|---------|-----------|--------------------|---------------------|------------------------|------------------------|-----------------------|------------------------|---------------|---------------|
| year 1  | LCS12     | 1187               | 1059.53             | 49.80                  | 1009.73                | 2                     | 0.002                  | 0.000         | 0.008         |
|         | LCS16     | 1198               | 1090.09             | 51.99                  | 1038.10                | 1                     | 0.001                  | 0.000         | 0.008         |
| year 2  | LCS12     | 960                | 879.05              | 30.98                  | 848.07                 | 1                     | 0.001                  | 0.000         | 0.008         |
|         | LCS16     | 1000               | 917.49              | 31.77                  | 885.72                 | 2                     | 0.002                  | 0.001         | 0.009         |
| year 3  | LCS12     | 801                | 727.47              | 37.96                  | 689.51                 | 0                     | 0.000                  | 0.000         | 0.000         |
|         | LCS16     | 840                | 764.71              | 23.71                  | 741.01                 | 2                     | 0.003                  | 0.001         | 0.010         |
| 2 years | LCS12     | 1187               | 1938.58             | 80.77                  | 1857.81                | 3                     | 0.003                  | 0.001         | 0.009         |
|         | LCS16     | 1198               | 2007.58             | 83.76                  | 1923.81                | 3                     | 0.003                  | 0.001         | 0.010         |
| 3 years | LCS12     | 1187               | 2666.05             | 118.73                 | 2547.32                | 3                     | 0.003                  | 0.001         | 0.009         |
|         | LCS16     | 1198               | 2772.29             | 107.47                 | 2664.82                | 5                     | 0.006                  | 0.002         | 0.014         |

Note: WY = women years, 1 WY equals to 365 days, CIL = confidence interval limit

Global Biostatistics: /by-sasp/patdb/projects/de04209/310442/stat/prod\_interim03/pgms/i-eff-km-ect-bmi.sas sgrpp 27OCT2011 12:54

Table 14.2.1 / 17: Probability of getting pregnant (ectopic pregnancies) by treatment and BMI-group (Kaplan-Meier analysis) (FAS) (cont.)

Analysis type: unadj.

BMI group: &gt;= 30 kg/m2

| Time    | TREATMENT | Number of subjects | Total exposure [WY] | Excluded exposure [WY] | Relevant exposure [WY] | Number of pregnancies | Cumulative probability | lower 95% CIL | upper 95% CIL |
|---------|-----------|--------------------|---------------------|------------------------|------------------------|-----------------------|------------------------|---------------|---------------|
| year 1  | LCS12     | 244                | 219.69              | 12.56                  | 207.13                 | 0                     | 0.000                  | 0.000         | 0.000         |
|         | LCS16     | 250                | 222.71              | 11.58                  | 211.13                 | 1                     | 0.005                  | 0.001         | 0.037         |
| year 2  | LCS12     | 201                | 176.93              | 10.33                  | 166.60                 | 0                     | 0.000                  | 0.000         | 0.000         |
|         | LCS16     | 203                | 185.24              | 6.06                   | 179.18                 | 1                     | 0.005                  | 0.001         | 0.035         |
| year 3  | LCS12     | 158                | 142.88              | 7.27                   | 135.61                 | 0                     | 0.000                  | 0.000         | 0.000         |
|         | LCS16     | 168                | 151.60              | 3.50                   | 148.10                 | 0                     | 0.000                  | 0.000         | 0.000         |
| 2 years | LCS12     | 244                | 396.62              | 22.89                  | 373.73                 | 0                     | 0.000                  | 0.000         | 0.000         |
|         | LCS16     | 250                | 407.95              | 17.64                  | 390.31                 | 2                     | 0.010                  | 0.003         | 0.039         |
| 3 years | LCS12     | 244                | 539.51              | 30.16                  | 509.34                 | 0                     | 0.000                  | 0.000         | 0.000         |
|         | LCS16     | 250                | 559.55              | 21.14                  | 538.41                 | 2                     | 0.010                  | 0.002         | 0.039         |

Note: WY = women years, 1 WY equals to 365 days, CIL = confidence interval limit

Global Biostatistics: /by-sasp/patdb/projects/de04209/310442/stat/prod\_interim03/pgms/i-eff-km-ect-bmi.sas sgrpp 27OCT2011 12:54



Table 14.2.1 / 17: Probability of getting pregnant (ectopic pregnancies) by treatment and BMI-group (Kaplan-Meier analysis) (FAS) (cont.)

 Analysis type: adj.  
 BMI group: missing

| Time    | TREATMENT | Number of subjects | Total exposure [WY] | Excluded exposure [WY] | Relevant exposure [WY] | Number of pregnancies | Cumulative probability | lower 95% CIL | upper 95% CIL |
|---------|-----------|--------------------|---------------------|------------------------|------------------------|-----------------------|------------------------|---------------|---------------|
| year 1  | LCS12     | 1                  | 1.00                | 0.08                   | 0.92                   | 0                     | 0.000                  | 0.000         | 0.000         |
|         | LCS16     | 4                  | 3.57                | 0.02                   | 3.55                   | 0                     | 0.000                  | 0.000         | 0.000         |
| year 2  | LCS12     | 1                  | 1.00                | 0.00                   | 1.00                   | 0                     | 0.000                  | 0.000         | 0.000         |
|         | LCS16     | 3                  | 2.59                | 0.00                   | 2.59                   | 0                     | 0.000                  | 0.000         | 0.000         |
| year 3  | LCS12     | 1                  | 0.07                | 0.02                   | 0.05                   | 0                     | 0.000                  | 0.000         | 0.000         |
|         | LCS16     | 2                  | 1.99                | 0.00                   | 1.99                   | 0                     | 0.000                  | 0.000         | 0.000         |
| 2 years | LCS12     | 1                  | 2.00                | 0.08                   | 1.92                   | 0                     | 0.000                  | 0.000         | 0.000         |
|         | LCS16     | 4                  | 6.16                | 0.02                   | 6.15                   | 0                     | 0.000                  | 0.000         | 0.000         |
| 3 years | LCS12     | 1                  | 2.07                | 0.10                   | 1.96                   | 0                     | 0.000                  | 0.000         | 0.000         |
|         | LCS16     | 4                  | 8.15                | 0.02                   | 8.13                   | 0                     | 0.000                  | 0.000         | 0.000         |

Note: WY = women years, 1 WY equals to 365 days, CIL = confidence interval limit

Global Biostatistics: /by-sasp/patdb/projects/de04209/310442/stat/prod\_interim03/pgms/i-eff-km-ect-bmi.sas sgrpp 27OCT2011 12:54

Table 14.2.1 / 17: Probability of getting pregnant (ectopic pregnancies) by treatment and BMI-group (Kaplan-Meier analysis) (FAS) (cont.)

Analysis type: adj.

BMI group: < 30 kg/m2

| Time    | TREATMENT | Number of subjects | Total exposure [WY] | Excluded exposure [WY] | Relevant exposure [WY] | Number of pregnancies | Cumulative probability | lower 95% CIL | upper 95% CIL |
|---------|-----------|--------------------|---------------------|------------------------|------------------------|-----------------------|------------------------|---------------|---------------|
| year 1  | LCS12     | 1187               | 1052.56             | 49.17                  | 1003.39                | 2                     | 0.002                  | 0.000         | 0.008         |
|         | LCS16     | 1198               | 1079.20             | 51.15                  | 1028.05                | 1                     | 0.001                  | 0.000         | 0.008         |
| year 2  | LCS12     | 955                | 870.88              | 29.78                  | 841.09                 | 1                     | 0.001                  | 0.000         | 0.008         |
|         | LCS16     | 994                | 909.24              | 31.26                  | 877.98                 | 2                     | 0.002                  | 0.001         | 0.010         |
| year 3  | LCS12     | 794                | 721.39              | 37.50                  | 683.89                 | 0                     | 0.000                  | 0.000         | 0.000         |
|         | LCS16     | 831                | 759.48              | 23.44                  | 736.05                 | 2                     | 0.003                  | 0.001         | 0.010         |
| 2 years | LCS12     | 1187               | 1923.44             | 78.95                  | 1844.48                | 3                     | 0.003                  | 0.001         | 0.009         |
|         | LCS16     | 1198               | 1988.44             | 82.41                  | 1906.03                | 3                     | 0.003                  | 0.001         | 0.011         |
| 3 years | LCS12     | 1187               | 2644.82             | 116.45                 | 2528.38                | 3                     | 0.003                  | 0.001         | 0.009         |
|         | LCS16     | 1198               | 2747.92             | 105.84                 | 2642.08                | 5                     | 0.006                  | 0.002         | 0.014         |

Note: WY = women years, 1 WY equals to 365 days, CIL = confidence interval limit

Global Biostatistics: /by-sasp/patdb/projects/de04209/310442/stat/prod\_interim03/pgms/i-eff-km-ect-bmi.sas sgrpp 27OCT2011 12:54

**Table 14.2.1 / 17: Probability of getting pregnant (ectopic pregnancies) by treatment and BMI-group (Kaplan-Meier analysis) (FAS) (cont.)**

Analysis type: adj.

BMI group: &gt;= 30 kg/m2

| Time    | TREATMENT | Number of subjects | Total exposure [WY] | Excluded exposure [WY] | Relevant exposure [WY] | Number of pregnancies | Cumulative probability | lower 95% CIL | upper 95% CIL |
|---------|-----------|--------------------|---------------------|------------------------|------------------------|-----------------------|------------------------|---------------|---------------|
| year 1  | LCS12     | 244                | 216.86              | 12.34                  | 204.52                 | 0                     | 0.000                  | 0.000         | 0.000         |
|         | LCS16     | 250                | 218.15              | 11.13                  | 207.02                 | 1                     | 0.005                  | 0.001         | 0.037         |
| year 2  | LCS12     | 199                | 176.76              | 10.30                  | 166.47                 | 0                     | 0.000                  | 0.000         | 0.000         |
|         | LCS16     | 201                | 183.80              | 6.01                   | 177.79                 | 1                     | 0.005                  | 0.001         | 0.035         |
| year 3  | LCS12     | 158                | 141.98              | 7.24                   | 134.74                 | 0                     | 0.000                  | 0.000         | 0.000         |
|         | LCS16     | 167                | 150.23              | 3.48                   | 146.75                 | 0                     | 0.000                  | 0.000         | 0.000         |
| 2 years | LCS12     | 244                | 393.62              | 22.64                  | 370.99                 | 0                     | 0.000                  | 0.000         | 0.000         |
|         | LCS16     | 250                | 401.95              | 17.13                  | 384.81                 | 2                     | 0.010                  | 0.003         | 0.040         |
| 3 years | LCS12     | 244                | 535.61              | 29.88                  | 505.73                 | 0                     | 0.000                  | 0.000         | 0.000         |
|         | LCS16     | 250                | 552.17              | 20.61                  | 531.56                 | 2                     | 0.010                  | 0.003         | 0.039         |

Note: WY = women years, 1 WY equals to 365 days, CIL = confidence interval limit

Global Biostatistics: /by-sasp/patdb/projects/de04209/310442/stat/prod\_interim03/pgms/i-eff-km-ect-bmi.sas sgrpp 27OCT2011 12:54

End of table

### **14.2.2 Bleeding pattern (not included)**

### **14.2.3 Other efficacy variables**

**Table 14.2.3 / 1: User satisfaction questionnaire (FAS)**

| Volunteer satisf. questionn., questions | Volunteer satisfaction questionnaire | LCS12         | LCS16         | Total         |
|-----------------------------------------|--------------------------------------|---------------|---------------|---------------|
| study treat, overall satisfaction       | n                                    | 1053 (100.0%) | 1063 (100.0%) | 2116 (100.0%) |
|                                         | missing                              | 1 ( <0.1%)    | 1 ( <0.1%)    | 2 ( <0.1%)    |
|                                         | very satisfied                       | 796 ( 75.6%)  | 842 ( 79.2%)  | 1638 ( 77.4%) |
|                                         | somewhat satisfied                   | 201 ( 19.1%)  | 177 ( 16.7%)  | 378 ( 17.9%)  |
|                                         | neither satisfied / dissatisfied     | 31 ( 2.9%)    | 22 ( 2.1%)    | 53 ( 2.5%)    |
|                                         | dissatisfied                         | 23 ( 2.2%)    | 18 ( 1.7%)    | 41 ( 1.9%)    |
|                                         | very dissatisfied                    | 1 ( <0.1%)    | 3 ( 0.3%)     | 4 ( 0.2%)     |
| change of regimen, likelihood           | n                                    | 1053 (100.0%) | 1063 (100.0%) | 2116 (100.0%) |
|                                         | missing                              | 2 ( 0.2%)     | 1 ( <0.1%)    | 3 ( 0.1%)     |
|                                         | continue with LCS                    | 811 ( 77.0%)  | 872 ( 82.0%)  | 1683 ( 79.5%) |
|                                         | use a different horm. contr.         | 86 ( 8.2%)    | 45 ( 4.2%)    | 131 ( 6.2%)   |
|                                         | use a different contr. meth.         | 79 ( 7.5%)    | 68 ( 6.4%)    | 147 ( 6.9%)   |
|                                         | discontinue use of all types of c    | 28 ( 2.7%)    | 27 ( 2.5%)    | 55 ( 2.6%)    |
|                                         | don't know                           | 47 ( 4.5%)    | 50 ( 4.7%)    | 97 ( 4.6%)    |
| menstrual bleeding, comparison          | n                                    | 1053 (100.0%) | 1063 (100.0%) | 2116 (100.0%) |
|                                         | missing                              | 2 ( 0.2%)     | 1 ( <0.1%)    | 3 ( 0.1%)     |
|                                         | decreased                            | 913 ( 86.7%)  | 985 ( 92.7%)  | 1898 ( 89.7%) |
|                                         | no change                            | 85 ( 8.1%)    | 48 ( 4.5%)    | 133 ( 6.3%)   |
|                                         | increased                            | 53 ( 5.0%)    | 29 ( 2.7%)    | 82 ( 3.9%)    |
| menstrual bleeding pattern              | n                                    | 1053 (100.0%) | 1063 (100.0%) | 2116 (100.0%) |
|                                         | missing                              | 2 ( 0.2%)     | 5 ( 0.5%)     | 7 ( 0.3%)     |
|                                         | very satisfied                       | 514 ( 48.8%)  | 537 ( 50.5%)  | 1051 ( 49.7%) |
|                                         | somewhat satisfied                   | 293 ( 27.8%)  | 272 ( 25.6%)  | 565 ( 26.7%)  |
|                                         | neither satisfied / dissatisfied     | 100 ( 9.5%)   | 77 ( 7.2%)    | 177 ( 8.4%)   |
|                                         | dissatisfied                         | 66 ( 6.3%)    | 59 ( 5.6%)    | 125 ( 5.9%)   |
|                                         | very dissatisfied                    | 20 ( 1.9%)    | 13 ( 1.2%)    | 33 ( 1.6%)    |
|                                         | not applicable                       | 58 ( 5.5%)    | 100 ( 9.4%)   | 158 ( 7.5%)   |
| menstrual bleeding, unexpected          | n                                    | 1053 (100.0%) | 1063 (100.0%) | 2116 (100.0%) |
|                                         | missing                              | 3 ( 0.3%)     | 1 ( <0.1%)    | 4 ( 0.2%)     |
|                                         | never                                | 342 ( 32.5%)  | 327 ( 30.8%)  | 669 ( 31.6%)  |
|                                         | seldom                               | 589 ( 55.9%)  | 634 ( 59.6%)  | 1223 ( 57.8%) |
|                                         | often                                | 98 ( 9.3%)    | 79 ( 7.4%)    | 177 ( 8.4%)   |
|                                         | very often                           | 21 ( 2.0%)    | 22 ( 2.1%)    | 43 ( 2.0%)    |

**Table 14.2.3 / 1: User satisfaction questionnaire (FAS)**

| Volunteer satisf. questionn., questions | Volunteer satisfaction questionnaire | LCS12         | LCS16         | Total         |
|-----------------------------------------|--------------------------------------|---------------|---------------|---------------|
| menstrual bleeding, absence             | n                                    | 1053 (100.0%) | 1063 (100.0%) | 2116 (100.0%) |
|                                         | missing                              | 918 ( 87.2%)  | 833 ( 78.4%)  | 1751 ( 82.8%) |
|                                         | very satisfied                       | 115 ( 10.9%)  | 189 ( 17.8%)  | 304 ( 14.4%)  |
|                                         | somewhat satisfied                   | 12 ( 1.1%)    | 26 ( 2.4%)    | 38 ( 1.8%)    |
|                                         | neither satisfied / dissatisfied     | 6 ( 0.6%)     | 11 ( 1.0%)    | 17 ( 0.8%)    |
|                                         | dissatisfied                         | 2 ( 0.2%)     | 4 ( 0.4%)     | 6 ( 0.3%)     |
| menstrual pain, treatment               | n                                    | 1053 (100.0%) | 1063 (100.0%) | 2116 (100.0%) |
|                                         | missing                              | 3 ( 0.3%)     | 1 ( <0.1%)    | 4 ( 0.2%)     |
|                                         | none                                 | 425 ( 40.4%)  | 448 ( 42.1%)  | 873 ( 41.3%)  |
|                                         | mild                                 | 469 ( 44.5%)  | 480 ( 45.2%)  | 949 ( 44.8%)  |
|                                         | moderate                             | 130 ( 12.3%)  | 119 ( 11.2%)  | 249 ( 11.8%)  |
|                                         | severe                               | 26 ( 2.5%)    | 15 ( 1.4%)    | 41 ( 1.9%)    |
| menstrual pain, comparison              | n                                    | 1053 (100.0%) | 1063 (100.0%) | 2116 (100.0%) |
|                                         | missing                              | 139 ( 13.2%)  | 114 ( 10.7%)  | 253 ( 12.0%)  |
|                                         | decreased                            | 602 ( 57.2%)  | 681 ( 64.1%)  | 1283 ( 60.6%) |
|                                         | no change                            | 195 ( 18.5%)  | 197 ( 18.5%)  | 392 ( 18.5%)  |
|                                         | increased                            | 117 ( 11.1%)  | 71 ( 6.7%)    | 188 ( 8.9%)   |

Note: Only collected after Amendment 3 to study protocol

Global Biostatistics: /by-sasp/patdb/projects/de04209/310442/stat/prod\_interim03/pgms/t-usq.sas sgrpp 27OCT2011 13:09

End of table

### **14.3 Safety**



### **14.3.1 Analyses of adverse events**

**Table 14.3.1 / 1: Number of subjects by number of baseline findings (FAS)**

|                             | LCS12         | LCS16         | Total         |
|-----------------------------|---------------|---------------|---------------|
| Number of subjects          | 1432 (100.0%) | 1452 (100.0%) | 2884 (100.0%) |
| Number of Baseline Findings |               |               |               |
| 0                           | 702 ( 49.0%)  | 685 ( 47.2%)  | 1387 ( 48.1%) |
| 1                           | 391 ( 27.3%)  | 392 ( 27.0%)  | 783 ( 27.1%)  |
| 2                           | 172 ( 12.0%)  | 197 ( 13.6%)  | 369 ( 12.8%)  |
| 3                           | 90 ( 6.3%)    | 97 ( 6.7%)    | 187 ( 6.5%)   |
| 4                           | 44 ( 3.1%)    | 45 ( 3.1%)    | 89 ( 3.1%)    |
| 5                           | 21 ( 1.5%)    | 17 ( 1.2%)    | 38 ( 1.3%)    |
| 6                           | 8 ( 0.6%)     | 8 ( 0.6%)     | 16 ( 0.6%)    |
| 7                           | 2 ( 0.1%)     | 5 ( 0.3%)     | 7 ( 0.2%)     |
| 8                           | 1 ( <0.1%)    | 3 ( 0.2%)     | 4 ( 0.1%)     |
| 9                           | 0             | 2 ( 0.1%)     | 2 ( <0.1%)    |
| => 10                       | 1 ( <0.1%)    | 1 ( <0.1%)    | 2 ( <0.1%)    |

Global Biostatistics: /by-sasp/patdb/projects/de04209/310442/stat/prod\_interim03/pgms/t-basfin.sas epkl 12OCT2011 11:19

End of table

**Table 14.3.1 / 2: Number of subjects with baseline findings and number of baseline findings by MedDRA SOC/PT (FAS)**

| Primary system organ class<br>Preferred term<br>MedDRA version 14.0 | LCS12  |               | LCS16  |               | Total  |               |
|---------------------------------------------------------------------|--------|---------------|--------|---------------|--------|---------------|
|                                                                     | Events | N=1432 (100%) | Events | N=1452 (100%) | Events | N=2884 (100%) |
| ANY EVENT                                                           | 1367   | 730 ( 51.0%)  | 1478   | 767 ( 52.8%)  | 2845   | 1497 ( 51.9%) |
| Blood and lymphatic system disorders                                | 13     | 13 ( 0.9%)    | 27     | 26 ( 1.8%)    | 40     | 39 ( 1.4%)    |
| Anaemia                                                             | 10     | 10 ( 0.7%)    | 23     | 23 ( 1.6%)    | 33     | 33 ( 1.1%)    |
| Coagulopathy                                                        | 1      | 1 (<0.1%)     | 0      | 0             | 1      | 1 (<0.1%)     |
| Haemoconcentration                                                  | 0      | 0             | 1      | 1 (<0.1%)     | 1      | 1 (<0.1%)     |
| Iron deficiency anaemia                                             | 0      | 0             | 1      | 1 (<0.1%)     | 1      | 1 (<0.1%)     |
| Lymphadenopathy                                                     | 0      | 0             | 2      | 2 ( 0.1%)     | 2      | 2 (<0.1%)     |
| Pernicious anaemia                                                  | 1      | 1 (<0.1%)     | 0      | 0             | 1      | 1 (<0.1%)     |
| Splenomegaly                                                        | 1      | 1 (<0.1%)     | 0      | 0             | 1      | 1 (<0.1%)     |
| Cardiac disorders                                                   | 4      | 4 ( 0.3%)     | 10     | 9 ( 0.6%)     | 14     | 13 ( 0.5%)    |
| Arrhythmia                                                          | 0      | 0             | 2      | 2 ( 0.1%)     | 2      | 2 (<0.1%)     |
| Extrasystoles                                                       | 1      | 1 (<0.1%)     | 1      | 1 (<0.1%)     | 2      | 2 (<0.1%)     |
| Long QT syndrome                                                    | 0      | 0             | 1      | 1 (<0.1%)     | 1      | 1 (<0.1%)     |
| Mitral valve incompetence                                           | 0      | 0             | 1      | 1 (<0.1%)     | 1      | 1 (<0.1%)     |
| Mitral valve prolapse                                               | 3      | 3 ( 0.2%)     | 2      | 2 ( 0.1%)     | 5      | 5 ( 0.2%)     |
| Palpitations                                                        | 0      | 0             | 1      | 1 (<0.1%)     | 1      | 1 (<0.1%)     |
| Tachycardia                                                         | 0      | 0             | 2      | 2 ( 0.1%)     | 2      | 2 (<0.1%)     |
| Congenital, familial and genetic disorders                          | 5      | 5 ( 0.3%)     | 8      | 8 ( 0.6%)     | 13     | 13 ( 0.5%)    |
| Bicuspid aortic valve                                               | 0      | 0             | 1      | 1 (<0.1%)     | 1      | 1 (<0.1%)     |
| Dermoid cyst                                                        | 0      | 0             | 1      | 1 (<0.1%)     | 1      | 1 (<0.1%)     |
| Ehlers-Danlos syndrome                                              | 1      | 1 (<0.1%)     | 0      | 0             | 1      | 1 (<0.1%)     |
| Factor V Leiden mutation                                            | 1      | 1 (<0.1%)     | 1      | 1 (<0.1%)     | 2      | 2 (<0.1%)     |
| Gilbert's syndrome                                                  | 1      | 1 (<0.1%)     | 0      | 0             | 1      | 1 (<0.1%)     |
| Haemangioma congenital                                              | 1      | 1 (<0.1%)     | 0      | 0             | 1      | 1 (<0.1%)     |
| Peroneal muscular atrophy                                           | 0      | 0             | 1      | 1 (<0.1%)     | 1      | 1 (<0.1%)     |
| Sickle cell trait                                                   | 0      | 0             | 1      | 1 (<0.1%)     | 1      | 1 (<0.1%)     |
| Ventricular septal defect                                           | 1      | 1 (<0.1%)     | 0      | 0             | 1      | 1 (<0.1%)     |
| Von Willebrand's disease                                            | 0      | 0             | 3      | 3 ( 0.2%)     | 3      | 3 ( 0.1%)     |

**Table 14.3.1 / 2: Number of subjects with baseline findings and number of baseline findings by MedDRA SOC/PT (FAS)**

| Primary system organ class<br>Preferred term<br>MedDRA version 14.0 | LCS12  |               | LCS16  |               | Total  |               |
|---------------------------------------------------------------------|--------|---------------|--------|---------------|--------|---------------|
|                                                                     | Events | N=1432 (100%) | Events | N=1452 (100%) | Events | N=2884 (100%) |
| Ear and labyrinth disorders                                         | 12     | 10 ( 0.7%)    | 5      | 5 ( 0.3%)     | 17     | 15 ( 0.5%)    |
| Cerumen impaction                                                   | 0      | 0             | 1      | 1 ( <0.1%)    | 1      | 1 ( <0.1%)    |
| Deafness bilateral                                                  | 1      | 1 ( <0.1%)    | 0      | 0             | 1      | 1 ( <0.1%)    |
| Ear discomfort                                                      | 1      | 1 ( <0.1%)    | 0      | 0             | 1      | 1 ( <0.1%)    |
| Hypoacusis                                                          | 1      | 1 ( <0.1%)    | 0      | 0             | 1      | 1 ( <0.1%)    |
| Meniere's disease                                                   | 2      | 2 ( 0.1%)     | 0      | 0             | 2      | 2 ( <0.1%)    |
| Motion sickness                                                     | 1      | 1 ( <0.1%)    | 0      | 0             | 1      | 1 ( <0.1%)    |
| Tinnitus                                                            | 2      | 2 ( 0.1%)     | 2      | 2 ( 0.1%)     | 4      | 4 ( 0.1%)     |
| Tympanic membrane perforation                                       | 2      | 2 ( 0.1%)     | 0      | 0             | 2      | 2 ( <0.1%)    |
| Tympanic membrane scarring                                          | 1      | 1 ( <0.1%)    | 0      | 0             | 1      | 1 ( <0.1%)    |
| Vertigo                                                             | 1      | 1 ( <0.1%)    | 2      | 2 ( 0.1%)     | 3      | 3 ( 0.1%)     |
| Endocrine disorders                                                 | 31     | 31 ( 2.2%)    | 33     | 32 ( 2.2%)    | 64     | 63 ( 2.2%)    |
| Goitre                                                              | 2      | 2 ( 0.1%)     | 2      | 2 ( 0.1%)     | 4      | 4 ( 0.1%)     |
| Hyperprolactinaemia                                                 | 0      | 0             | 2      | 2 ( 0.1%)     | 2      | 2 ( <0.1%)    |
| Hyperthyroidism                                                     | 3      | 3 ( 0.2%)     | 1      | 1 ( <0.1%)    | 4      | 4 ( 0.1%)     |
| Hypothyroidism                                                      | 25     | 25 ( 1.7%)    | 26     | 26 ( 1.8%)    | 51     | 51 ( 1.8%)    |
| Thyroiditis                                                         | 1      | 1 ( <0.1%)    | 2      | 2 ( 0.1%)     | 3      | 3 ( 0.1%)     |
| Eye disorders                                                       | 53     | 50 ( 3.5%)    | 58     | 55 ( 3.8%)    | 111    | 105 ( 3.6%)   |
| Asthenopia                                                          | 1      | 1 ( <0.1%)    | 0      | 0             | 1      | 1 ( <0.1%)    |
| Astigmatism                                                         | 2      | 2 ( 0.1%)     | 5      | 5 ( 0.3%)     | 7      | 7 ( 0.2%)     |
| Chalazion                                                           | 0      | 0             | 1      | 1 ( <0.1%)    | 1      | 1 ( <0.1%)    |
| Conjunctivitis                                                      | 1      | 1 ( <0.1%)    | 2      | 2 ( 0.1%)     | 3      | 3 ( 0.1%)     |
| Conjunctivitis allergic                                             | 0      | 0             | 1      | 1 ( <0.1%)    | 1      | 1 ( <0.1%)    |
| Dry eye                                                             | 0      | 0             | 2      | 2 ( 0.1%)     | 2      | 2 ( <0.1%)    |
| Ectropion                                                           | 0      | 0             | 1      | 1 ( <0.1%)    | 1      | 1 ( <0.1%)    |
| Eyelid ptosis                                                       | 1      | 1 ( <0.1%)    | 0      | 0             | 1      | 1 ( <0.1%)    |
| Hypermetropia                                                       | 6      | 6 ( 0.4%)     | 6      | 6 ( 0.4%)     | 12     | 12 ( 0.4%)    |
| Keratoconus                                                         | 1      | 1 ( <0.1%)    | 0      | 0             | 1      | 1 ( <0.1%)    |
| Myopia                                                              | 40     | 40 ( 2.8%)    | 39     | 39 ( 2.7%)    | 79     | 79 ( 2.7%)    |
| Presbyopia                                                          | 0      | 0             | 1      | 1 ( <0.1%)    | 1      | 1 ( <0.1%)    |
| Ulcerative keratitis                                                | 1      | 1 ( <0.1%)    | 0      | 0             | 1      | 1 ( <0.1%)    |

**Table 14.3.1 / 2: Number of subjects with baseline findings and number of baseline findings by MedDRA SOC/PT (FAS)**

| Primary system organ class<br>Preferred term<br>MedDRA version 14.0 | LCS12  |               | LCS16  |               | Total  |               |
|---------------------------------------------------------------------|--------|---------------|--------|---------------|--------|---------------|
|                                                                     | Events | N=1432 (100%) | Events | N=1452 (100%) | Events | N=2884 (100%) |
| Gastrointestinal disorders                                          | 79     | 70 ( 4.9%)    | 64     | 58 ( 4.0%)    | 143    | 128 ( 4.4%)   |
| Abdominal discomfort                                                | 0      | 0             | 1      | 1 ( <0.1%)    | 1      | 1 ( <0.1%)    |
| Abdominal distension                                                | 2      | 2 ( 0.1%)     | 0      | 0             | 2      | 2 ( <0.1%)    |
| Abdominal pain                                                      | 6      | 6 ( 0.4%)     | 4      | 4 ( 0.3%)     | 10     | 10 ( 0.3%)    |
| Abdominal pain lower                                                | 0      | 0             | 2      | 2 ( 0.1%)     | 2      | 2 ( <0.1%)    |
| Abdominal pain upper                                                | 0      | 0             | 1      | 1 ( <0.1%)    | 1      | 1 ( <0.1%)    |
| Anal fissure                                                        | 1      | 1 ( <0.1%)    | 0      | 0             | 1      | 1 ( <0.1%)    |
| Coeliac disease                                                     | 2      | 2 ( 0.1%)     | 2      | 2 ( 0.1%)     | 4      | 4 ( 0.1%)     |
| Colitis                                                             | 1      | 1 ( <0.1%)    | 0      | 0             | 1      | 1 ( <0.1%)    |
| Colitis ulcerative                                                  | 4      | 4 ( 0.3%)     | 2      | 2 ( 0.1%)     | 6      | 6 ( 0.2%)     |
| Constipation                                                        | 6      | 6 ( 0.4%)     | 9      | 9 ( 0.6%)     | 15     | 15 ( 0.5%)    |
| Crohn's disease                                                     | 2      | 2 ( 0.1%)     | 1      | 1 ( <0.1%)    | 3      | 3 ( 0.1%)     |
| Diarrhoea                                                           | 2      | 2 ( 0.1%)     | 3      | 3 ( 0.2%)     | 5      | 5 ( 0.2%)     |
| Dyspepsia                                                           | 8      | 8 ( 0.6%)     | 4      | 4 ( 0.3%)     | 12     | 12 ( 0.4%)    |
| Faecal incontinence                                                 | 1      | 1 ( <0.1%)    | 0      | 0             | 1      | 1 ( <0.1%)    |
| Flatulence                                                          | 3      | 3 ( 0.2%)     | 0      | 0             | 3      | 3 ( 0.1%)     |
| Food poisoning                                                      | 0      | 0             | 1      | 1 ( <0.1%)    | 1      | 1 ( <0.1%)    |
| Gastric disorder                                                    | 1      | 1 ( <0.1%)    | 0      | 0             | 1      | 1 ( <0.1%)    |
| Gastritis                                                           | 6      | 6 ( 0.4%)     | 4      | 4 ( 0.3%)     | 10     | 10 ( 0.3%)    |
| Gastrooesophageal reflux disease                                    | 5      | 5 ( 0.3%)     | 11     | 11 ( 0.8%)    | 16     | 16 ( 0.6%)    |
| Glossitis                                                           | 1      | 1 ( <0.1%)    | 0      | 0             | 1      | 1 ( <0.1%)    |
| Haemorrhoids                                                        | 2      | 2 ( 0.1%)     | 1      | 1 ( <0.1%)    | 3      | 3 ( 0.1%)     |
| Hiatus hernia                                                       | 2      | 2 ( 0.1%)     | 1      | 1 ( <0.1%)    | 3      | 3 ( 0.1%)     |
| Inguinal hernia                                                     | 1      | 1 ( <0.1%)    | 0      | 0             | 1      | 1 ( <0.1%)    |
| Irritable bowel syndrome                                            | 12     | 12 ( 0.8%)    | 8      | 8 ( 0.6%)     | 20     | 20 ( 0.7%)    |
| Malocclusion                                                        | 1      | 1 ( <0.1%)    | 0      | 0             | 1      | 1 ( <0.1%)    |
| Nausea                                                              | 4      | 4 ( 0.3%)     | 4      | 4 ( 0.3%)     | 8      | 8 ( 0.3%)     |
| Oesophagitis                                                        | 0      | 0             | 1      | 1 ( <0.1%)    | 1      | 1 ( <0.1%)    |
| Periodontitis                                                       | 0      | 0             | 1      | 1 ( <0.1%)    | 1      | 1 ( <0.1%)    |
| Proctalgia                                                          | 1      | 1 ( <0.1%)    | 0      | 0             | 1      | 1 ( <0.1%)    |
| Reflux oesophagitis                                                 | 1      | 1 ( <0.1%)    | 0      | 0             | 1      | 1 ( <0.1%)    |
| Toothache                                                           | 1      | 1 ( <0.1%)    | 1      | 1 ( <0.1%)    | 2      | 2 ( <0.1%)    |
| Umbilical hernia                                                    | 3      | 3 ( 0.2%)     | 1      | 1 ( <0.1%)    | 4      | 4 ( 0.1%)     |
| Vomiting                                                            | 0      | 0             | 1      | 1 ( <0.1%)    | 1      | 1 ( <0.1%)    |

**Table 14.3.1 / 2: Number of subjects with baseline findings and number of baseline findings by MedDRA SOC/PT (FAS)**

| Primary system organ class<br>Preferred term<br>MedDRA version 14.0 | LCS12  |               | LCS16  |               | Total  |               |
|---------------------------------------------------------------------|--------|---------------|--------|---------------|--------|---------------|
|                                                                     | Events | N=1432 (100%) | Events | N=1452 (100%) | Events | N=2884 (100%) |
| General disorders and administration site conditions                | 15     | 15 ( 1.0%)    | 9      | 9 ( 0.6%)     | 24     | 24 ( 0.8%)    |
| Asthenia                                                            | 1      | 1 (<0.1%)     | 0      | 0             | 1      | 1 (<0.1%)     |
| Chest pain                                                          | 0      | 0             | 1      | 1 (<0.1%)     | 1      | 1 (<0.1%)     |
| Cyst                                                                | 0      | 0             | 1      | 1 (<0.1%)     | 1      | 1 (<0.1%)     |
| Fatigue                                                             | 4      | 4 ( 0.3%)     | 3      | 3 ( 0.2%)     | 7      | 7 ( 0.2%)     |
| Influenza like illness                                              | 1      | 1 (<0.1%)     | 0      | 0             | 1      | 1 (<0.1%)     |
| Irritability                                                        | 1      | 1 (<0.1%)     | 1      | 1 (<0.1%)     | 2      | 2 (<0.1%)     |
| Oedema peripheral                                                   | 2      | 2 ( 0.1%)     | 1      | 1 (<0.1%)     | 3      | 3 ( 0.1%)     |
| Pain                                                                | 5      | 5 ( 0.3%)     | 1      | 1 (<0.1%)     | 6      | 6 ( 0.2%)     |
| Pyrexia                                                             | 1      | 1 (<0.1%)     | 1      | 1 (<0.1%)     | 2      | 2 (<0.1%)     |
| Hepatobiliary disorders                                             | 1      | 1 (<0.1%)     | 5      | 5 ( 0.3%)     | 6      | 6 ( 0.2%)     |
| Cholelithiasis                                                      | 1      | 1 (<0.1%)     | 3      | 3 ( 0.2%)     | 4      | 4 ( 0.1%)     |
| Hepatic steatosis                                                   | 0      | 0             | 2      | 2 ( 0.1%)     | 2      | 2 (<0.1%)     |
| Immune system disorders                                             | 65     | 51 ( 3.6%)    | 67     | 51 ( 3.5%)    | 132    | 102 ( 3.5%)   |
| Allergy to animal                                                   | 3      | 3 ( 0.2%)     | 9      | 8 ( 0.6%)     | 12     | 11 ( 0.4%)    |
| Allergy to arthropod sting                                          | 2      | 2 ( 0.1%)     | 0      | 0             | 2      | 2 (<0.1%)     |
| Allergy to chemicals                                                | 0      | 0             | 1      | 1 (<0.1%)     | 1      | 1 (<0.1%)     |
| Allergy to metals                                                   | 3      | 3 ( 0.2%)     | 2      | 1 (<0.1%)     | 5      | 4 ( 0.1%)     |
| Atopy                                                               | 1      | 1 (<0.1%)     | 0      | 0             | 1      | 1 (<0.1%)     |
| Drug hypersensitivity                                               | 8      | 5 ( 0.3%)     | 7      | 6 ( 0.4%)     | 15     | 11 ( 0.4%)    |
| Food allergy                                                        | 3      | 3 ( 0.2%)     | 6      | 4 ( 0.3%)     | 9      | 7 ( 0.2%)     |
| House dust allergy                                                  | 6      | 6 ( 0.4%)     | 3      | 3 ( 0.2%)     | 9      | 9 ( 0.3%)     |
| Hypersensitivity                                                    | 11     | 11 ( 0.8%)    | 7      | 7 ( 0.5%)     | 18     | 18 ( 0.6%)    |
| Latex allergy                                                       | 0      | 0             | 2      | 2 ( 0.1%)     | 2      | 2 (<0.1%)     |
| Milk allergy                                                        | 1      | 1 (<0.1%)     | 1      | 1 (<0.1%)     | 2      | 2 (<0.1%)     |
| Multiple allergies                                                  | 1      | 1 (<0.1%)     | 1      | 1 (<0.1%)     | 2      | 2 (<0.1%)     |
| Seasonal allergy                                                    | 26     | 26 ( 1.8%)    | 28     | 28 ( 1.9%)    | 54     | 54 ( 1.9%)    |

**Table 14.3.1 / 2: Number of subjects with baseline findings and number of baseline findings by MedDRA SOC/PT (FAS)**

| Primary system organ class<br>Preferred term<br>MedDRA version 14.0 | LCS12  |               | LCS16  |               | Total  |               |
|---------------------------------------------------------------------|--------|---------------|--------|---------------|--------|---------------|
|                                                                     | Events | N=1432 (100%) | Events | N=1452 (100%) | Events | N=2884 (100%) |
| Infections and infestations                                         | 194    | 168 ( 11.7%)  | 182    | 158 ( 10.9%)  | 376    | 326 ( 11.3%)  |
| Acute tonsillitis                                                   | 1      | 1 ( <0.1%)    | 1      | 1 ( <0.1%)    | 2      | 2 ( <0.1%)    |
| Anogenital warts                                                    | 1      | 1 ( <0.1%)    | 1      | 1 ( <0.1%)    | 2      | 2 ( <0.1%)    |
| Body tinea                                                          | 1      | 1 ( <0.1%)    | 0      | 0             | 1      | 1 ( <0.1%)    |
| Bronchitis                                                          | 5      | 5 ( 0.3%)     | 5      | 5 ( 0.3%)     | 10     | 10 ( 0.3%)    |
| Cellulitis                                                          | 0      | 0             | 1      | 1 ( <0.1%)    | 1      | 1 ( <0.1%)    |
| Cervicitis                                                          | 2      | 2 ( 0.1%)     | 1      | 1 ( <0.1%)    | 3      | 3 ( 0.1%)     |
| Cervicitis gonococcal                                               | 1      | 1 ( <0.1%)    | 0      | 0             | 1      | 1 ( <0.1%)    |
| Chlamydial cervicitis                                               | 6      | 6 ( 0.4%)     | 5      | 5 ( 0.3%)     | 11     | 11 ( 0.4%)    |
| Chlamydial infection                                                | 3      | 3 ( 0.2%)     | 3      | 3 ( 0.2%)     | 6      | 6 ( 0.2%)     |
| Chronic sinusitis                                                   | 2      | 2 ( 0.1%)     | 0      | 0             | 2      | 2 ( <0.1%)    |
| Cystitis                                                            | 5      | 4 ( 0.3%)     | 1      | 1 ( <0.1%)    | 6      | 5 ( 0.2%)     |
| Ear infection                                                       | 1      | 1 ( <0.1%)    | 1      | 1 ( <0.1%)    | 2      | 2 ( <0.1%)    |
| Folliculitis                                                        | 1      | 1 ( <0.1%)    | 1      | 1 ( <0.1%)    | 2      | 2 ( <0.1%)    |
| Fungal infection                                                    | 1      | 1 ( <0.1%)    | 5      | 5 ( 0.3%)     | 6      | 6 ( 0.2%)     |
| Fungal skin infection                                               | 1      | 1 ( <0.1%)    | 0      | 0             | 1      | 1 ( <0.1%)    |
| Gastroenteritis                                                     | 2      | 2 ( 0.1%)     | 2      | 2 ( 0.1%)     | 4      | 4 ( 0.1%)     |
| Genital candidiasis                                                 | 0      | 0             | 1      | 1 ( <0.1%)    | 1      | 1 ( <0.1%)    |
| Genital herpes                                                      | 4      | 4 ( 0.3%)     | 9      | 9 ( 0.6%)     | 13     | 13 ( 0.5%)    |
| Genital infection bacterial                                         | 1      | 1 ( <0.1%)    | 0      | 0             | 1      | 1 ( <0.1%)    |
| Gonorrhoea                                                          | 1      | 1 ( <0.1%)    | 1      | 1 ( <0.1%)    | 2      | 2 ( <0.1%)    |
| Gynaecological chlamydia infection                                  | 2      | 2 ( 0.1%)     | 0      | 0             | 2      | 2 ( <0.1%)    |
| Herpes dermatitis                                                   | 1      | 1 ( <0.1%)    | 0      | 0             | 1      | 1 ( <0.1%)    |
| Herpes simplex                                                      | 2      | 2 ( 0.1%)     | 1      | 1 ( <0.1%)    | 3      | 3 ( 0.1%)     |
| Infection                                                           | 0      | 0             | 1      | 1 ( <0.1%)    | 1      | 1 ( <0.1%)    |
| Influenza                                                           | 11     | 11 ( 0.8%)    | 5      | 5 ( 0.3%)     | 16     | 16 ( 0.6%)    |
| Lactobacillus infection                                             | 1      | 1 ( <0.1%)    | 0      | 0             | 1      | 1 ( <0.1%)    |
| Laryngitis                                                          | 2      | 2 ( 0.1%)     | 1      | 1 ( <0.1%)    | 3      | 3 ( 0.1%)     |
| Localised infection                                                 | 1      | 1 ( <0.1%)    | 0      | 0             | 1      | 1 ( <0.1%)    |
| Molluscum contagiosum                                               | 1      | 1 ( <0.1%)    | 1      | 1 ( <0.1%)    | 2      | 2 ( <0.1%)    |
| Nasopharyngitis                                                     | 15     | 15 ( 1.0%)    | 24     | 22 ( 1.5%)    | 39     | 37 ( 1.3%)    |
| Onychomycosis                                                       | 2      | 2 ( 0.1%)     | 3      | 3 ( 0.2%)     | 5      | 5 ( 0.2%)     |
| Oral herpes                                                         | 3      | 3 ( 0.2%)     | 6      | 6 ( 0.4%)     | 9      | 9 ( 0.3%)     |
| Otitis media                                                        | 2      | 2 ( 0.1%)     | 0      | 0             | 2      | 2 ( <0.1%)    |
| Otitis media bacterial                                              | 1      | 1 ( <0.1%)    | 0      | 0             | 1      | 1 ( <0.1%)    |
| Papilloma viral infection                                           | 1      | 1 ( <0.1%)    | 0      | 0             | 1      | 1 ( <0.1%)    |
| Pelvic infection                                                    | 0      | 0             | 1      | 1 ( <0.1%)    | 1      | 1 ( <0.1%)    |
| Pharyngitis                                                         | 5      | 5 ( 0.3%)     | 3      | 3 ( 0.2%)     | 8      | 8 ( 0.3%)     |
| Pharyngitis streptococcal                                           | 1      | 1 ( <0.1%)    | 2      | 2 ( 0.1%)     | 3      | 3 ( 0.1%)     |
| Pneumonia                                                           | 0      | 0             | 3      | 3 ( 0.2%)     | 3      | 3 ( 0.1%)     |
| Respiratory tract infection                                         | 2      | 2 ( 0.1%)     | 2      | 2 ( 0.1%)     | 4      | 4 ( 0.1%)     |
| Rhinitis                                                            | 2      | 2 ( 0.1%)     | 1      | 1 ( <0.1%)    | 3      | 3 ( 0.1%)     |
| Sinusitis                                                           | 14     | 14 ( 1.0%)    | 14     | 14 ( 1.0%)    | 28     | 28 ( 1.0%)    |

**Table 14.3.1 / 2: Number of subjects with baseline findings and number of baseline findings by MedDRA SOC/PT (FAS)**

| Primary system organ class<br>Preferred term<br>MedDRA version 14.0 | LCS12  |               | LCS16  |               | Total  |               |
|---------------------------------------------------------------------|--------|---------------|--------|---------------|--------|---------------|
|                                                                     | Events | N=1432 (100%) | Events | N=1452 (100%) | Events | N=2884 (100%) |
| Skin infection                                                      | 3      | 3 ( 0.2%)     | 1      | 1 (<0.1%)     | 4      | 4 ( 0.1%)     |
| Staphylococcal skin infection                                       | 1      | 1 (<0.1%)     | 0      | 0             | 1      | 1 (<0.1%)     |
| Tinea infection                                                     | 2      | 1 (<0.1%)     | 0      | 0             | 2      | 1 (<0.1%)     |
| Tinea pedis                                                         | 2      | 2 ( 0.1%)     | 0      | 0             | 2      | 2 (<0.1%)     |
| Tonsillitis                                                         | 4      | 4 ( 0.3%)     | 2      | 2 ( 0.1%)     | 6      | 6 ( 0.2%)     |
| Tooth abscess                                                       | 1      | 1 (<0.1%)     | 0      | 0             | 1      | 1 (<0.1%)     |
| Tooth infection                                                     | 1      | 1 (<0.1%)     | 2      | 2 ( 0.1%)     | 3      | 3 ( 0.1%)     |
| Upper respiratory tract infection                                   | 8      | 7 ( 0.5%)     | 10     | 10 ( 0.7%)    | 18     | 17 ( 0.6%)    |
| Urinary tract infection                                             | 13     | 13 ( 0.9%)    | 16     | 15 ( 1.0%)    | 29     | 28 ( 1.0%)    |
| Vaginal infection                                                   | 3      | 3 ( 0.2%)     | 6      | 6 ( 0.4%)     | 9      | 9 ( 0.3%)     |
| Vaginitis bacterial                                                 | 27     | 27 ( 1.9%)    | 20     | 20 ( 1.4%)    | 47     | 47 ( 1.6%)    |
| Vaginitis chlamydial                                                | 2      | 2 ( 0.1%)     | 1      | 1 (<0.1%)     | 3      | 3 ( 0.1%)     |
| Viral upper respiratory tract infection                             | 1      | 1 (<0.1%)     | 3      | 3 ( 0.2%)     | 4      | 4 ( 0.1%)     |
| Vulvitis                                                            | 2      | 2 ( 0.1%)     | 0      | 0             | 2      | 2 (<0.1%)     |
| Vulvovaginal candidiasis                                            | 9      | 9 ( 0.6%)     | 9      | 9 ( 0.6%)     | 18     | 18 ( 0.6%)    |
| Vulvovaginal mycotic infection                                      | 6      | 5 ( 0.3%)     | 5      | 5 ( 0.3%)     | 11     | 10 ( 0.3%)    |
| Vulvovaginitis streptococcal                                        | 0      | 0             | 1      | 1 (<0.1%)     | 1      | 1 (<0.1%)     |
| Vulvovaginitis trichomonal                                          | 1      | 1 (<0.1%)     | 0      | 0             | 1      | 1 (<0.1%)     |
| Injury, poisoning and procedural complications                      | 13     | 11 ( 0.8%)    | 18     | 15 ( 1.0%)    | 31     | 26 ( 0.9%)    |
| Ankle fracture                                                      | 0      | 0             | 2      | 2 ( 0.1%)     | 2      | 2 (<0.1%)     |
| Cartilage injury                                                    | 0      | 0             | 1      | 1 (<0.1%)     | 1      | 1 (<0.1%)     |
| Concussion                                                          | 3      | 2 ( 0.1%)     | 0      | 0             | 3      | 2 (<0.1%)     |
| Epicondylitis                                                       | 0      | 0             | 1      | 1 (<0.1%)     | 1      | 1 (<0.1%)     |
| Head injury                                                         | 1      | 1 (<0.1%)     | 0      | 0             | 1      | 1 (<0.1%)     |
| Incision site pain                                                  | 0      | 0             | 1      | 1 (<0.1%)     | 1      | 1 (<0.1%)     |
| Joint injury                                                        | 2      | 2 ( 0.1%)     | 0      | 0             | 2      | 2 (<0.1%)     |
| Ligament rupture                                                    | 0      | 0             | 1      | 1 (<0.1%)     | 1      | 1 (<0.1%)     |
| Limb injury                                                         | 1      | 1 (<0.1%)     | 0      | 0             | 1      | 1 (<0.1%)     |
| Muscle strain                                                       | 0      | 0             | 2      | 2 ( 0.1%)     | 2      | 2 (<0.1%)     |
| Neck injury                                                         | 0      | 0             | 1      | 1 (<0.1%)     | 1      | 1 (<0.1%)     |
| Post-traumatic pain                                                 | 0      | 0             | 2      | 2 ( 0.1%)     | 2      | 2 (<0.1%)     |
| Procedural pain                                                     | 3      | 3 ( 0.2%)     | 1      | 1 (<0.1%)     | 4      | 4 ( 0.1%)     |
| Procedural site reaction                                            | 0      | 0             | 1      | 1 (<0.1%)     | 1      | 1 (<0.1%)     |
| Spinal column injury                                                | 0      | 0             | 3      | 1 (<0.1%)     | 3      | 1 (<0.1%)     |
| Tooth fracture                                                      | 1      | 1 (<0.1%)     | 0      | 0             | 1      | 1 (<0.1%)     |
| Upper limb fracture                                                 | 0      | 0             | 1      | 1 (<0.1%)     | 1      | 1 (<0.1%)     |
| Whiplash injury                                                     | 0      | 0             | 1      | 1 (<0.1%)     | 1      | 1 (<0.1%)     |
| Wound                                                               | 1      | 1 (<0.1%)     | 0      | 0             | 1      | 1 (<0.1%)     |
| Wrist fracture                                                      | 1      | 1 (<0.1%)     | 0      | 0             | 1      | 1 (<0.1%)     |



**Table 14.3.1 / 2: Number of subjects with baseline findings and number of baseline findings by MedDRA SOC/PT (FAS)**

| Primary system organ class<br>Preferred term<br>MedDRA version 14.0 | LCS12  |               | LCS16  |               | Total  |               |
|---------------------------------------------------------------------|--------|---------------|--------|---------------|--------|---------------|
|                                                                     | Events | N=1432 (100%) | Events | N=1452 (100%) | Events | N=2884 (100%) |
| Investigations                                                      | 108    | 89 ( 6.2%)    | 125    | 98 ( 6.7%)    | 233    | 187 ( 6.5%)   |
| Alanine aminotransferase increased                                  | 10     | 10 ( 0.7%)    | 8      | 8 ( 0.6%)     | 18     | 18 ( 0.6%)    |
| Aspartate aminotransferase increased                                | 2      | 2 ( 0.1%)     | 2      | 2 ( 0.1%)     | 4      | 4 ( 0.1%)     |
| Biopsy                                                              | 1      | 1 (<0.1%)     | 0      | 0             | 1      | 1 (<0.1%)     |
| Blood albumin decreased                                             | 1      | 1 (<0.1%)     | 0      | 0             | 1      | 1 (<0.1%)     |
| Blood albumin increased                                             | 1      | 1 (<0.1%)     | 0      | 0             | 1      | 1 (<0.1%)     |
| Blood alkaline phosphatase increased                                | 1      | 1 (<0.1%)     | 0      | 0             | 1      | 1 (<0.1%)     |
| Blood cholesterol decreased                                         | 1      | 1 (<0.1%)     | 0      | 0             | 1      | 1 (<0.1%)     |
| Blood cholesterol increased                                         | 5      | 5 ( 0.3%)     | 4      | 4 ( 0.3%)     | 9      | 9 ( 0.3%)     |
| Blood creatinine decreased                                          | 2      | 2 ( 0.1%)     | 6      | 6 ( 0.4%)     | 8      | 8 ( 0.3%)     |
| Blood iron decreased                                                | 0      | 0             | 1      | 1 (<0.1%)     | 1      | 1 (<0.1%)     |
| Blood potassium decreased                                           | 1      | 1 (<0.1%)     | 0      | 0             | 1      | 1 (<0.1%)     |
| Blood potassium increased                                           | 5      | 5 ( 0.3%)     | 5      | 5 ( 0.3%)     | 10     | 10 ( 0.3%)    |
| Blood pressure increased                                            | 1      | 1 (<0.1%)     | 0      | 0             | 1      | 1 (<0.1%)     |
| Blood pressure systolic increased                                   | 0      | 0             | 1      | 1 (<0.1%)     | 1      | 1 (<0.1%)     |
| Blood sodium decreased                                              | 0      | 0             | 1      | 1 (<0.1%)     | 1      | 1 (<0.1%)     |
| Blood sodium increased                                              | 4      | 4 ( 0.3%)     | 2      | 2 ( 0.1%)     | 6      | 6 ( 0.2%)     |
| Blood triglycerides increased                                       | 6      | 6 ( 0.4%)     | 10     | 10 ( 0.7%)    | 16     | 16 ( 0.6%)    |
| Blood urine present                                                 | 1      | 1 (<0.1%)     | 2      | 2 ( 0.1%)     | 3      | 3 ( 0.1%)     |
| Cardiac murmur                                                      | 1      | 1 (<0.1%)     | 0      | 0             | 1      | 1 (<0.1%)     |
| Chlamydia test                                                      | 1      | 1 (<0.1%)     | 0      | 0             | 1      | 1 (<0.1%)     |
| Chlamydia test positive                                             | 5      | 5 ( 0.3%)     | 12     | 12 ( 0.8%)    | 17     | 17 ( 0.6%)    |
| Colposcopy                                                          | 1      | 1 (<0.1%)     | 0      | 0             | 1      | 1 (<0.1%)     |
| Fungal test positive                                                | 0      | 0             | 1      | 1 (<0.1%)     | 1      | 1 (<0.1%)     |
| Gamma-glutamyltransferase increased                                 | 5      | 5 ( 0.3%)     | 7      | 6 ( 0.4%)     | 12     | 11 ( 0.4%)    |
| Glycosylated haemoglobin increased                                  | 0      | 0             | 2      | 2 ( 0.1%)     | 2      | 2 (<0.1%)     |
| Haematocrit decreased                                               | 2      | 2 ( 0.1%)     | 4      | 4 ( 0.3%)     | 6      | 6 ( 0.2%)     |
| Haematocrit increased                                               | 1      | 1 (<0.1%)     | 0      | 0             | 1      | 1 (<0.1%)     |
| Haematology test abnormal                                           | 0      | 0             | 1      | 1 (<0.1%)     | 1      | 1 (<0.1%)     |
| Haemoglobin decreased                                               | 5      | 5 ( 0.3%)     | 8      | 8 ( 0.6%)     | 13     | 13 ( 0.5%)    |
| Haemoglobin increased                                               | 0      | 0             | 1      | 1 (<0.1%)     | 1      | 1 (<0.1%)     |
| Haemoglobin urine present                                           | 0      | 0             | 2      | 2 ( 0.1%)     | 2      | 2 (<0.1%)     |
| Heart sounds abnormal                                               | 1      | 1 (<0.1%)     | 0      | 0             | 1      | 1 (<0.1%)     |
| Hepatic enzyme increased                                            | 2      | 2 ( 0.1%)     | 1      | 1 (<0.1%)     | 3      | 3 ( 0.1%)     |
| High density lipoprotein abnormal                                   | 2      | 2 ( 0.1%)     | 0      | 0             | 2      | 2 (<0.1%)     |
| High density lipoprotein decreased                                  | 3      | 3 ( 0.2%)     | 3      | 3 ( 0.2%)     | 6      | 6 ( 0.2%)     |
| Human papilloma virus test positive                                 | 0      | 0             | 2      | 2 ( 0.1%)     | 2      | 2 (<0.1%)     |
| Lipids increased                                                    | 1      | 1 (<0.1%)     | 0      | 0             | 1      | 1 (<0.1%)     |
| Liver function test abnormal                                        | 1      | 1 (<0.1%)     | 0      | 0             | 1      | 1 (<0.1%)     |
| Low density lipoprotein decreased                                   | 0      | 0             | 1      | 1 (<0.1%)     | 1      | 1 (<0.1%)     |
| Low density lipoprotein increased                                   | 7      | 7 ( 0.5%)     | 5      | 5 ( 0.3%)     | 12     | 12 ( 0.4%)    |
| Platelet count decreased                                            | 0      | 0             | 2      | 2 ( 0.1%)     | 2      | 2 (<0.1%)     |
| Platelet count increased                                            | 0      | 0             | 1      | 1 (<0.1%)     | 1      | 1 (<0.1%)     |

**Table 14.3.1 / 2: Number of subjects with baseline findings and number of baseline findings by MedDRA SOC/PT (FAS)**

| Primary system organ class<br>Preferred term<br>MedDRA version 14.0 | LCS12     |                   | LCS16     |                   | Total     |                   |
|---------------------------------------------------------------------|-----------|-------------------|-----------|-------------------|-----------|-------------------|
|                                                                     | Events    | N=1432 (100%)     | Events    | N=1452 (100%)     | Events    | N=2884 (100%)     |
| Pregnancy test positive                                             | 1         | 1 (<0.1%)         | 0         | 0                 | 1         | 1 (<0.1%)         |
| Protein total decreased                                             | 2         | 2 ( 0.1%)         | 1         | 1 (<0.1%)         | 3         | 3 ( 0.1%)         |
| Protein total increased                                             | 1         | 1 (<0.1%)         | 2         | 2 ( 0.1%)         | 3         | 3 ( 0.1%)         |
| Red blood cell count decreased                                      | 0         | 0                 | 1         | 1 (<0.1%)         | 1         | 1 (<0.1%)         |
| Red blood cell count increased                                      | 1         | 1 (<0.1%)         | 1         | 1 (<0.1%)         | 2         | 2 (<0.1%)         |
| Rhesus antibodies negative                                          | 0         | 0                 | 1         | 1 (<0.1%)         | 1         | 1 (<0.1%)         |
| Smear cervix abnormal                                               | 10        | 10 ( 0.7%)        | 5         | 5 ( 0.3%)         | 15        | 15 ( 0.5%)        |
| Ultrasound uterus abnormal                                          | 1         | 1 (<0.1%)         | 0         | 0                 | 1         | 1 (<0.1%)         |
| Urine leukocyte esterase positive                                   | 2         | 2 ( 0.1%)         | 1         | 1 (<0.1%)         | 3         | 3 ( 0.1%)         |
| Weight decreased                                                    | 1         | 1 (<0.1%)         | 0         | 0                 | 1         | 1 (<0.1%)         |
| Weight increased                                                    | 0         | 0                 | 2         | 2 ( 0.1%)         | 2         | 2 (<0.1%)         |
| White blood cell count decreased                                    | 3         | 3 ( 0.2%)         | 7         | 7 ( 0.5%)         | 10        | 10 ( 0.3%)        |
| White blood cell count increased                                    | 6         | 6 ( 0.4%)         | 9         | 9 ( 0.6%)         | 15        | 15 ( 0.5%)        |
| <b>Metabolism and nutrition disorders</b>                           | <b>26</b> | <b>25 ( 1.7%)</b> | <b>35</b> | <b>33 ( 2.3%)</b> | <b>61</b> | <b>58 ( 2.0%)</b> |
| Diabetes mellitus                                                   | 0         | 0                 | 1         | 1 (<0.1%)         | 1         | 1 (<0.1%)         |
| Fluid retention                                                     | 0         | 0                 | 2         | 2 ( 0.1%)         | 2         | 2 (<0.1%)         |
| Hypercholesterolaemia                                               | 3         | 3 ( 0.2%)         | 4         | 4 ( 0.3%)         | 7         | 7 ( 0.2%)         |
| Hyperlipidaemia                                                     | 2         | 2 ( 0.1%)         | 2         | 2 ( 0.1%)         | 4         | 4 ( 0.1%)         |
| Hypertriglyceridaemia                                               | 1         | 1 (<0.1%)         | 0         | 0                 | 1         | 1 (<0.1%)         |
| Hypocholesterolaemia                                                | 1         | 1 (<0.1%)         | 0         | 0                 | 1         | 1 (<0.1%)         |
| Hypoglycaemia                                                       | 1         | 1 (<0.1%)         | 2         | 2 ( 0.1%)         | 3         | 3 ( 0.1%)         |
| Hypokalaemia                                                        | 0         | 0                 | 1         | 1 (<0.1%)         | 1         | 1 (<0.1%)         |
| Insulin resistance                                                  | 4         | 4 ( 0.3%)         | 6         | 6 ( 0.4%)         | 10        | 10 ( 0.3%)        |
| Iron deficiency                                                     | 0         | 0                 | 2         | 2 ( 0.1%)         | 2         | 2 (<0.1%)         |
| Lactose intolerance                                                 | 5         | 5 ( 0.3%)         | 7         | 7 ( 0.5%)         | 12        | 12 ( 0.4%)        |
| Obesity                                                             | 5         | 5 ( 0.3%)         | 7         | 7 ( 0.5%)         | 12        | 12 ( 0.4%)        |
| Overweight                                                          | 1         | 1 (<0.1%)         | 0         | 0                 | 1         | 1 (<0.1%)         |
| Type 1 diabetes mellitus                                            | 3         | 3 ( 0.2%)         | 1         | 1 (<0.1%)         | 4         | 4 ( 0.1%)         |

**Table 14.3.1 / 2: Number of subjects with baseline findings and number of baseline findings by MedDRA SOC/PT (FAS)**

| Primary system organ class<br>Preferred term<br>MedDRA version 14.0 | LCS12  |               | LCS16  |               | Total  |               |
|---------------------------------------------------------------------|--------|---------------|--------|---------------|--------|---------------|
|                                                                     | Events | N=1432 (100%) | Events | N=1452 (100%) | Events | N=2884 (100%) |
| Musculoskeletal and connective tissue disorders                     | 67     | 63 ( 4.4%)    | 79     | 64 ( 4.4%)    | 146    | 127 ( 4.4%)   |
| Ankylosing spondylitis                                              | 1      | 1 (<0.1%)     | 0      | 0             | 1      | 1 (<0.1%)     |
| Arthralgia                                                          | 6      | 6 ( 0.4%)     | 4      | 4 ( 0.3%)     | 10     | 10 ( 0.3%)    |
| Arthritis                                                           | 1      | 1 (<0.1%)     | 7      | 4 ( 0.3%)     | 8      | 5 ( 0.2%)     |
| Back pain                                                           | 21     | 21 ( 1.5%)    | 20     | 20 ( 1.4%)    | 41     | 41 ( 1.4%)    |
| Bone pain                                                           | 0      | 0             | 1      | 1 (<0.1%)     | 1      | 1 (<0.1%)     |
| Fibromyalgia                                                        | 1      | 1 (<0.1%)     | 2      | 2 ( 0.1%)     | 3      | 3 ( 0.1%)     |
| Foot deformity                                                      | 0      | 0             | 3      | 2 ( 0.1%)     | 3      | 2 (<0.1%)     |
| Intervertebral disc degeneration                                    | 1      | 1 (<0.1%)     | 0      | 0             | 1      | 1 (<0.1%)     |
| Intervertebral disc protrusion                                      | 4      | 4 ( 0.3%)     | 1      | 1 (<0.1%)     | 5      | 5 ( 0.2%)     |
| Juvenile arthritis                                                  | 1      | 1 (<0.1%)     | 0      | 0             | 1      | 1 (<0.1%)     |
| Medial tibial stress syndrome                                       | 1      | 1 (<0.1%)     | 0      | 0             | 1      | 1 (<0.1%)     |
| Muscle contracture                                                  | 1      | 1 (<0.1%)     | 0      | 0             | 1      | 1 (<0.1%)     |
| Muscle spasms                                                       | 2      | 2 ( 0.1%)     | 0      | 0             | 2      | 2 (<0.1%)     |
| Muscle tightness                                                    | 4      | 4 ( 0.3%)     | 2      | 2 ( 0.1%)     | 6      | 6 ( 0.2%)     |
| Muscular weakness                                                   | 0      | 0             | 1      | 1 (<0.1%)     | 1      | 1 (<0.1%)     |
| Musculoskeletal chest pain                                          | 1      | 1 (<0.1%)     | 0      | 0             | 1      | 1 (<0.1%)     |
| Musculoskeletal pain                                                | 4      | 4 ( 0.3%)     | 6      | 6 ( 0.4%)     | 10     | 10 ( 0.3%)    |
| Myalgia                                                             | 3      | 2 ( 0.1%)     | 4      | 4 ( 0.3%)     | 7      | 6 ( 0.2%)     |
| Myokymia                                                            | 0      | 0             | 2      | 2 ( 0.1%)     | 2      | 2 (<0.1%)     |
| Neck pain                                                           | 1      | 1 (<0.1%)     | 7      | 7 ( 0.5%)     | 8      | 8 ( 0.3%)     |
| Osteitis                                                            | 0      | 0             | 1      | 1 (<0.1%)     | 1      | 1 (<0.1%)     |
| Osteoarthritis                                                      | 2      | 1 (<0.1%)     | 0      | 0             | 2      | 1 (<0.1%)     |
| Osteopenia                                                          | 1      | 1 (<0.1%)     | 1      | 1 (<0.1%)     | 2      | 2 (<0.1%)     |
| Pain in extremity                                                   | 3      | 3 ( 0.2%)     | 4      | 4 ( 0.3%)     | 7      | 7 ( 0.2%)     |
| Patellofemoral pain syndrome                                        | 0      | 0             | 3      | 3 ( 0.2%)     | 3      | 3 ( 0.1%)     |
| Rheumatoid arthritis                                                | 3      | 3 ( 0.2%)     | 1      | 1 (<0.1%)     | 4      | 4 ( 0.1%)     |
| Scoliosis                                                           | 5      | 5 ( 0.3%)     | 3      | 3 ( 0.2%)     | 8      | 8 ( 0.3%)     |
| Seronegative arthritis                                              | 0      | 0             | 1      | 1 (<0.1%)     | 1      | 1 (<0.1%)     |
| Tendonitis                                                          | 0      | 0             | 5      | 5 ( 0.3%)     | 5      | 5 ( 0.2%)     |

**Table 14.3.1 / 2: Number of subjects with baseline findings and number of baseline findings by MedDRA SOC/PT (FAS)**

| Primary system organ class<br>Preferred term<br>MedDRA version 14.0 | LCS12  |               | LCS16  |               | Total  |               |
|---------------------------------------------------------------------|--------|---------------|--------|---------------|--------|---------------|
|                                                                     | Events | N=1432 (100%) | Events | N=1452 (100%) | Events | N=2884 (100%) |
| Neoplasms benign, malignant and unspecified (incl cysts and polyps) | 19     | 19 ( 1.3%)    | 14     | 14 ( 1.0%)    | 33     | 33 ( 1.1%)    |
| Acrochordon                                                         | 0      | 0             | 1      | 1 (<0.1%)     | 1      | 1 (<0.1%)     |
| Benign breast neoplasm                                              | 0      | 0             | 1      | 1 (<0.1%)     | 1      | 1 (<0.1%)     |
| Breast fibroma                                                      | 1      | 1 (<0.1%)     | 0      | 0             | 1      | 1 (<0.1%)     |
| Cervicitis human papilloma virus                                    | 2      | 2 ( 0.1%)     | 0      | 0             | 2      | 2 (<0.1%)     |
| Fibroadenoma of breast                                              | 2      | 2 ( 0.1%)     | 1      | 1 (<0.1%)     | 3      | 3 ( 0.1%)     |
| Fibroma                                                             | 0      | 0             | 1      | 1 (<0.1%)     | 1      | 1 (<0.1%)     |
| Glomus tumour                                                       | 1      | 1 (<0.1%)     | 0      | 0             | 1      | 1 (<0.1%)     |
| Lipoma                                                              | 2      | 2 ( 0.1%)     | 0      | 0             | 2      | 2 (<0.1%)     |
| Melanocytic naevus                                                  | 3      | 3 ( 0.2%)     | 2      | 2 ( 0.1%)     | 5      | 5 ( 0.2%)     |
| Prolactinoma                                                        | 1      | 1 (<0.1%)     | 0      | 0             | 1      | 1 (<0.1%)     |
| Skin papilloma                                                      | 1      | 1 (<0.1%)     | 0      | 0             | 1      | 1 (<0.1%)     |
| Uterine leiomyoma                                                   | 6      | 6 ( 0.4%)     | 7      | 7 ( 0.5%)     | 13     | 13 ( 0.5%)    |
| Vulvovaginal human papilloma virus infection                        | 0      | 0             | 1      | 1 (<0.1%)     | 1      | 1 (<0.1%)     |
| Nervous system disorders                                            | 152    | 142 ( 9.9%)   | 164    | 155 ( 10.7%)  | 316    | 297 ( 10.3%)  |
| Ageusia                                                             | 0      | 0             | 1      | 1 (<0.1%)     | 1      | 1 (<0.1%)     |
| Carpal tunnel syndrome                                              | 1      | 1 (<0.1%)     | 0      | 0             | 1      | 1 (<0.1%)     |
| Cervicobrachial syndrome                                            | 0      | 0             | 1      | 1 (<0.1%)     | 1      | 1 (<0.1%)     |
| Convulsion                                                          | 0      | 0             | 1      | 1 (<0.1%)     | 1      | 1 (<0.1%)     |
| Disturbance in attention                                            | 0      | 0             | 1      | 1 (<0.1%)     | 1      | 1 (<0.1%)     |
| Dizziness                                                           | 1      | 1 (<0.1%)     | 1      | 1 (<0.1%)     | 2      | 2 (<0.1%)     |
| Epilepsy                                                            | 5      | 5 ( 0.3%)     | 3      | 3 ( 0.2%)     | 8      | 8 ( 0.3%)     |
| Essential tremor                                                    | 0      | 0             | 1      | 1 (<0.1%)     | 1      | 1 (<0.1%)     |
| Headache                                                            | 79     | 77 ( 5.4%)    | 77     | 77 ( 5.3%)    | 156    | 154 ( 5.3%)   |
| Hypersomnia                                                         | 0      | 0             | 1      | 1 (<0.1%)     | 1      | 1 (<0.1%)     |
| Hypertonia                                                          | 0      | 0             | 1      | 1 (<0.1%)     | 1      | 1 (<0.1%)     |
| Migraine                                                            | 42     | 42 ( 2.9%)    | 52     | 52 ( 3.6%)    | 94     | 94 ( 3.3%)    |
| Migraine with aura                                                  | 0      | 0             | 1      | 1 (<0.1%)     | 1      | 1 (<0.1%)     |
| Migraine without aura                                               | 0      | 0             | 1      | 1 (<0.1%)     | 1      | 1 (<0.1%)     |
| Myasthenia gravis                                                   | 0      | 0             | 1      | 1 (<0.1%)     | 1      | 1 (<0.1%)     |
| Nerve compression                                                   | 0      | 0             | 1      | 1 (<0.1%)     | 1      | 1 (<0.1%)     |
| Nystagmus                                                           | 1      | 1 (<0.1%)     | 0      | 0             | 1      | 1 (<0.1%)     |
| Restless legs syndrome                                              | 1      | 1 (<0.1%)     | 0      | 0             | 1      | 1 (<0.1%)     |
| Sciatica                                                            | 3      | 3 ( 0.2%)     | 0      | 0             | 3      | 3 ( 0.1%)     |
| Sinus headache                                                      | 1      | 1 (<0.1%)     | 2      | 2 ( 0.1%)     | 3      | 3 ( 0.1%)     |
| Tension headache                                                    | 17     | 17 ( 1.2%)    | 18     | 18 ( 1.2%)    | 35     | 35 ( 1.2%)    |
| Tremor                                                              | 1      | 1 (<0.1%)     | 0      | 0             | 1      | 1 (<0.1%)     |

**Table 14.3.1 / 2: Number of subjects with baseline findings and number of baseline findings by MedDRA SOC/PT (FAS)**

| Primary system organ class<br>Preferred term<br>MedDRA version 14.0 | LCS12  |               | LCS16  |               | Total  |               |
|---------------------------------------------------------------------|--------|---------------|--------|---------------|--------|---------------|
|                                                                     | Events | N=1432 (100%) | Events | N=1452 (100%) | Events | N=2884 (100%) |
| Pregnancy, puerperium and perinatal conditions                      | 2      | 1 (<0.1%)     | 2      | 2 ( 0.1%)     | 4      | 3 ( 0.1%)     |
| Abortion                                                            | 1      | 1 (<0.1%)     | 0      | 0             | 1      | 1 (<0.1%)     |
| Pregnancy                                                           | 1      | 1 (<0.1%)     | 1      | 1 (<0.1%)     | 2      | 2 (<0.1%)     |
| Traumatic delivery                                                  | 0      | 0             | 1      | 1 (<0.1%)     | 1      | 1 (<0.1%)     |
| Psychiatric disorders                                               | 135    | 113 ( 7.9%)   | 137    | 114 ( 7.9%)   | 272    | 227 ( 7.9%)   |
| Alcohol abuse                                                       | 0      | 0             | 1      | 1 (<0.1%)     | 1      | 1 (<0.1%)     |
| Anorgasmia                                                          | 0      | 0             | 1      | 1 (<0.1%)     | 1      | 1 (<0.1%)     |
| Anxiety                                                             | 33     | 33 ( 2.3%)    | 33     | 33 ( 2.3%)    | 66     | 66 ( 2.3%)    |
| Attention deficit/hyperactivity disorder                            | 6      | 6 ( 0.4%)     | 7      | 7 ( 0.5%)     | 13     | 13 ( 0.5%)    |
| Bipolar I disorder                                                  | 1      | 1 (<0.1%)     | 0      | 0             | 1      | 1 (<0.1%)     |
| Bipolar disorder                                                    | 1      | 1 (<0.1%)     | 4      | 4 ( 0.3%)     | 5      | 5 ( 0.2%)     |
| Borderline personality disorder                                     | 0      | 0             | 1      | 1 (<0.1%)     | 1      | 1 (<0.1%)     |
| Bruxism                                                             | 1      | 1 (<0.1%)     | 0      | 0             | 1      | 1 (<0.1%)     |
| Burnout syndrome                                                    | 0      | 0             | 2      | 2 ( 0.1%)     | 2      | 2 (<0.1%)     |
| Depressed mood                                                      | 1      | 1 (<0.1%)     | 1      | 1 (<0.1%)     | 2      | 2 (<0.1%)     |
| Depression                                                          | 62     | 62 ( 4.3%)    | 51     | 51 ( 3.5%)    | 113    | 113 ( 3.9%)   |
| Encopresis                                                          | 0      | 0             | 1      | 1 (<0.1%)     | 1      | 1 (<0.1%)     |
| Generalised anxiety disorder                                        | 2      | 2 ( 0.1%)     | 0      | 0             | 2      | 2 (<0.1%)     |
| Insomnia                                                            | 16     | 16 ( 1.1%)    | 16     | 16 ( 1.1%)    | 32     | 32 ( 1.1%)    |
| Libido decreased                                                    | 2      | 2 ( 0.1%)     | 3      | 3 ( 0.2%)     | 5      | 5 ( 0.2%)     |
| Mood swings                                                         | 0      | 0             | 1      | 1 (<0.1%)     | 1      | 1 (<0.1%)     |
| Obsessive-compulsive disorder                                       | 2      | 2 ( 0.1%)     | 1      | 1 (<0.1%)     | 3      | 3 ( 0.1%)     |
| Panic disorder                                                      | 1      | 1 (<0.1%)     | 4      | 4 ( 0.3%)     | 5      | 5 ( 0.2%)     |
| Panic reaction                                                      | 0      | 0             | 1      | 1 (<0.1%)     | 1      | 1 (<0.1%)     |
| Phobia                                                              | 1      | 1 (<0.1%)     | 0      | 0             | 1      | 1 (<0.1%)     |
| Post-traumatic stress disorder                                      | 0      | 0             | 1      | 1 (<0.1%)     | 1      | 1 (<0.1%)     |
| Postpartum depression                                               | 5      | 5 ( 0.3%)     | 5      | 5 ( 0.3%)     | 10     | 10 ( 0.3%)    |
| Psychotic disorder                                                  | 0      | 0             | 1      | 1 (<0.1%)     | 1      | 1 (<0.1%)     |
| Seasonal affective disorder                                         | 0      | 0             | 1      | 1 (<0.1%)     | 1      | 1 (<0.1%)     |
| Sleep disorder                                                      | 1      | 1 (<0.1%)     | 0      | 0             | 1      | 1 (<0.1%)     |
| Social phobia                                                       | 0      | 0             | 1      | 1 (<0.1%)     | 1      | 1 (<0.1%)     |

**Table 14.3.1 / 2: Number of subjects with baseline findings and number of baseline findings by MedDRA SOC/PT (FAS)**

| Primary system organ class<br>Preferred term<br>MedDRA version 14.0 | LCS12  |               | LCS16  |               | Total  |               |
|---------------------------------------------------------------------|--------|---------------|--------|---------------|--------|---------------|
|                                                                     | Events | N=1432 (100%) | Events | N=1452 (100%) | Events | N=2884 (100%) |
| Renal and urinary disorders                                         | 12     | 10 ( 0.7%)    | 3      | 3 ( 0.2%)     | 15     | 13 ( 0.5%)    |
| Calculus urinary                                                    | 1      | 1 (<0.1%)     | 0      | 0             | 1      | 1 (<0.1%)     |
| Cystitis interstitial                                               | 2      | 2 ( 0.1%)     | 2      | 2 ( 0.1%)     | 4      | 4 ( 0.1%)     |
| Dysuria                                                             | 1      | 1 (<0.1%)     | 0      | 0             | 1      | 1 (<0.1%)     |
| Haematuria                                                          | 1      | 1 (<0.1%)     | 0      | 0             | 1      | 1 (<0.1%)     |
| Micturition urgency                                                 | 1      | 1 (<0.1%)     | 0      | 0             | 1      | 1 (<0.1%)     |
| Pollakiuria                                                         | 1      | 1 (<0.1%)     | 0      | 0             | 1      | 1 (<0.1%)     |
| Renal failure chronic                                               | 1      | 1 (<0.1%)     | 0      | 0             | 1      | 1 (<0.1%)     |
| Stress urinary incontinence                                         | 3      | 3 ( 0.2%)     | 1      | 1 (<0.1%)     | 4      | 4 ( 0.1%)     |
| Urinary incontinence                                                | 1      | 1 (<0.1%)     | 0      | 0             | 1      | 1 (<0.1%)     |

**Table 14.3.1 / 2: Number of subjects with baseline findings and number of baseline findings by MedDRA SOC/PT (FAS)**

| Primary system organ class<br>Preferred term<br>MedDRA version 14.0 | LCS12  |               | LCS16  |               | Total  |               |
|---------------------------------------------------------------------|--------|---------------|--------|---------------|--------|---------------|
|                                                                     | Events | N=1432 (100%) | Events | N=1452 (100%) | Events | N=2884 (100%) |
| Reproductive system and breast disorders                            | 216    | 186 ( 13.0%)  | 261    | 215 ( 14.8%)  | 477    | 401 ( 13.9%)  |
| Adnexa uteri mass                                                   | 1      | 1 ( <0.1%)    | 0      | 0             | 1      | 1 ( <0.1%)    |
| Adnexa uteri pain                                                   | 1      | 1 ( <0.1%)    | 0      | 0             | 1      | 1 ( <0.1%)    |
| Amenorrhoea                                                         | 0      | 0             | 3      | 3 ( 0.2%)     | 3      | 3 ( 0.1%)     |
| Bartholin's cyst                                                    | 2      | 2 ( 0.1%)     | 0      | 0             | 2      | 2 ( <0.1%)    |
| Breast atrophy                                                      | 1      | 1 ( <0.1%)    | 0      | 0             | 1      | 1 ( <0.1%)    |
| Breast cyst                                                         | 1      | 1 ( <0.1%)    | 1      | 1 ( <0.1%)    | 2      | 2 ( <0.1%)    |
| Breast discomfort                                                   | 2      | 2 ( 0.1%)     | 5      | 5 ( 0.3%)     | 7      | 7 ( 0.2%)     |
| Breast enlargement                                                  | 0      | 0             | 1      | 1 ( <0.1%)    | 1      | 1 ( <0.1%)    |
| Breast mass                                                         | 3      | 3 ( 0.2%)     | 1      | 1 ( <0.1%)    | 4      | 4 ( 0.1%)     |
| Breast pain                                                         | 1      | 1 ( <0.1%)    | 1      | 1 ( <0.1%)    | 2      | 2 ( <0.1%)    |
| Breast tenderness                                                   | 0      | 0             | 1      | 1 ( <0.1%)    | 1      | 1 ( <0.1%)    |
| Cervical cyst                                                       | 0      | 0             | 1      | 1 ( <0.1%)    | 1      | 1 ( <0.1%)    |
| Cervical dysplasia                                                  | 20     | 20 ( 1.4%)    | 24     | 24 ( 1.7%)    | 44     | 44 ( 1.5%)    |
| Cervical friability                                                 | 0      | 0             | 1      | 1 ( <0.1%)    | 1      | 1 ( <0.1%)    |
| Cervical polyp                                                      | 1      | 1 ( <0.1%)    | 2      | 2 ( 0.1%)     | 3      | 3 ( 0.1%)     |
| Cervix haemorrhage uterine                                          | 0      | 0             | 1      | 1 ( <0.1%)    | 1      | 1 ( <0.1%)    |
| Cervix inflammation                                                 | 2      | 2 ( 0.1%)     | 1      | 1 ( <0.1%)    | 3      | 3 ( 0.1%)     |
| Dysmenorrhoea                                                       | 95     | 95 ( 6.6%)    | 120    | 119 ( 8.2%)   | 215    | 214 ( 7.4%)   |
| Dyspareunia                                                         | 0      | 0             | 2      | 2 ( 0.1%)     | 2      | 2 ( <0.1%)    |
| Ectropion of cervix                                                 | 2      | 2 ( 0.1%)     | 2      | 2 ( 0.1%)     | 4      | 4 ( 0.1%)     |
| Endometriosis                                                       | 4      | 4 ( 0.3%)     | 4      | 4 ( 0.3%)     | 8      | 8 ( 0.3%)     |
| Fibrocystic breast disease                                          | 5      | 5 ( 0.3%)     | 3      | 3 ( 0.2%)     | 8      | 8 ( 0.3%)     |
| Galactorrhoea                                                       | 2      | 2 ( 0.1%)     | 2      | 2 ( 0.1%)     | 4      | 4 ( 0.1%)     |
| Genital discharge                                                   | 1      | 1 ( <0.1%)    | 4      | 4 ( 0.3%)     | 5      | 5 ( 0.2%)     |
| Haemorrhagic ovarian cyst                                           | 1      | 1 ( <0.1%)    | 0      | 0             | 1      | 1 ( <0.1%)    |
| Hydrometra                                                          | 1      | 1 ( <0.1%)    | 0      | 0             | 1      | 1 ( <0.1%)    |
| Menorrhagia                                                         | 4      | 4 ( 0.3%)     | 4      | 4 ( 0.3%)     | 8      | 8 ( 0.3%)     |
| Menstruation delayed                                                | 1      | 1 ( <0.1%)    | 0      | 0             | 1      | 1 ( <0.1%)    |
| Menstruation irregular                                              | 1      | 1 ( <0.1%)    | 0      | 0             | 1      | 1 ( <0.1%)    |
| Metrorrhagia                                                        | 1      | 1 ( <0.1%)    | 2      | 2 ( 0.1%)     | 3      | 3 ( 0.1%)     |
| Nipple disorder                                                     | 0      | 0             | 1      | 1 ( <0.1%)    | 1      | 1 ( <0.1%)    |
| Ovarian atrophy                                                     | 1      | 1 ( <0.1%)    | 0      | 0             | 1      | 1 ( <0.1%)    |
| Ovarian cyst                                                        | 22     | 21 ( 1.5%)    | 20     | 20 ( 1.4%)    | 42     | 41 ( 1.4%)    |
| Ovulation pain                                                      | 1      | 1 ( <0.1%)    | 0      | 0             | 1      | 1 ( <0.1%)    |
| Parovarian cyst                                                     | 2      | 2 ( 0.1%)     | 0      | 0             | 2      | 2 ( <0.1%)    |
| Pelvic pain                                                         | 0      | 0             | 1      | 1 ( <0.1%)    | 1      | 1 ( <0.1%)    |
| Polycystic ovaries                                                  | 1      | 1 ( <0.1%)    | 2      | 2 ( 0.1%)     | 3      | 3 ( 0.1%)     |
| Premenstrual syndrome                                               | 26     | 26 ( 1.8%)    | 35     | 35 ( 2.4%)    | 61     | 61 ( 2.1%)    |
| Rectocele                                                           | 1      | 1 ( <0.1%)    | 0      | 0             | 1      | 1 ( <0.1%)    |
| Uterine cervical erosion                                            | 1      | 1 ( <0.1%)    | 0      | 0             | 1      | 1 ( <0.1%)    |
| Uterine cervical pain                                               | 1      | 1 ( <0.1%)    | 0      | 0             | 1      | 1 ( <0.1%)    |
| Uterine cervix stenosis                                             | 0      | 0             | 1      | 1 ( <0.1%)    | 1      | 1 ( <0.1%)    |

**Table 14.3.1 / 2: Number of subjects with baseline findings and number of baseline findings by MedDRA SOC/PT (FAS)**

| Primary system organ class<br>Preferred term<br>MedDRA version 14.0 | LCS12  |               | LCS16  |               | Total  |               |
|---------------------------------------------------------------------|--------|---------------|--------|---------------|--------|---------------|
|                                                                     | Events | N=1432 (100%) | Events | N=1452 (100%) | Events | N=2884 (100%) |
| Uterine spasm                                                       | 1      | 1 (<0.1%)     | 0      | 0             | 1      | 1 (<0.1%)     |
| Vaginal cyst                                                        | 0      | 0             | 1      | 1 (<0.1%)     | 1      | 1 (<0.1%)     |
| Vaginal discharge                                                   | 0      | 0             | 6      | 6 ( 0.4%)     | 6      | 6 ( 0.2%)     |
| Vaginal disorder                                                    | 1      | 1 (<0.1%)     | 1      | 1 (<0.1%)     | 2      | 2 (<0.1%)     |
| Vaginal haemorrhage                                                 | 1      | 1 (<0.1%)     | 0      | 0             | 1      | 1 (<0.1%)     |
| Varicose veins vaginal                                              | 1      | 1 (<0.1%)     | 0      | 0             | 1      | 1 (<0.1%)     |
| Vulvovaginal burning sensation                                      | 1      | 1 (<0.1%)     | 1      | 1 (<0.1%)     | 2      | 2 (<0.1%)     |
| Vulvovaginal discomfort                                             | 0      | 0             | 1      | 1 (<0.1%)     | 1      | 1 (<0.1%)     |
| Vulvovaginal dryness                                                | 1      | 1 (<0.1%)     | 2      | 2 ( 0.1%)     | 3      | 3 ( 0.1%)     |
| Vulvovaginal erythema                                               | 1      | 1 (<0.1%)     | 0      | 0             | 1      | 1 (<0.1%)     |
| Vulvovaginal pain                                                   | 0      | 0             | 1      | 1 (<0.1%)     | 1      | 1 (<0.1%)     |
| Vulvovaginal pruritus                                               | 0      | 0             | 2      | 2 ( 0.1%)     | 2      | 2 (<0.1%)     |
| Respiratory, thoracic and mediastinal disorders                     | 44     | 44 ( 3.1%)    | 59     | 58 ( 4.0%)    | 103    | 102 ( 3.5%)   |
| Allergic bronchitis                                                 | 1      | 1 (<0.1%)     | 0      | 0             | 1      | 1 (<0.1%)     |
| Allergic respiratory disease                                        | 0      | 0             | 1      | 1 (<0.1%)     | 1      | 1 (<0.1%)     |
| Allergic sinusitis                                                  | 1      | 1 (<0.1%)     | 0      | 0             | 1      | 1 (<0.1%)     |
| Asthma                                                              | 30     | 30 ( 2.1%)    | 42     | 42 ( 2.9%)    | 72     | 72 ( 2.5%)    |
| Asthma exercise induced                                             | 3      | 3 ( 0.2%)     | 1      | 1 (<0.1%)     | 4      | 4 ( 0.1%)     |
| Bronchospasm                                                        | 1      | 1 (<0.1%)     | 0      | 0             | 1      | 1 (<0.1%)     |
| Cough                                                               | 0      | 0             | 4      | 4 ( 0.3%)     | 4      | 4 ( 0.1%)     |
| Dysphonia                                                           | 0      | 0             | 1      | 1 (<0.1%)     | 1      | 1 (<0.1%)     |
| Nasal disorder                                                      | 1      | 1 (<0.1%)     | 0      | 0             | 1      | 1 (<0.1%)     |
| Nasal obstruction                                                   | 0      | 0             | 1      | 1 (<0.1%)     | 1      | 1 (<0.1%)     |
| Nasal septum deviation                                              | 0      | 0             | 1      | 1 (<0.1%)     | 1      | 1 (<0.1%)     |
| Oropharyngeal pain                                                  | 1      | 1 (<0.1%)     | 0      | 0             | 1      | 1 (<0.1%)     |
| Rhinitis allergic                                                   | 3      | 3 ( 0.2%)     | 5      | 5 ( 0.3%)     | 8      | 8 ( 0.3%)     |
| Sinus congestion                                                    | 2      | 2 ( 0.1%)     | 3      | 3 ( 0.2%)     | 5      | 5 ( 0.2%)     |
| Vasomotor rhinitis                                                  | 1      | 1 (<0.1%)     | 0      | 0             | 1      | 1 (<0.1%)     |



**Table 14.3.1 / 2: Number of subjects with baseline findings and number of baseline findings by MedDRA SOC/PT (FAS)**

| Primary system organ class<br>Preferred term<br>MedDRA version 14.0 | LCS12  |               | LCS16  |               | Total  |               |
|---------------------------------------------------------------------|--------|---------------|--------|---------------|--------|---------------|
|                                                                     | Events | N=1432 (100%) | Events | N=1452 (100%) | Events | N=2884 (100%) |
| Skin and subcutaneous tissue disorders                              | 71     | 64 ( 4.5%)    | 83     | 74 ( 5.1%)    | 154    | 138 ( 4.8%)   |
| Acanthosis nigricans                                                | 0      | 0             | 1      | 1 ( <0.1%)    | 1      | 1 ( <0.1%)    |
| Acne                                                                | 32     | 32 ( 2.2%)    | 31     | 31 ( 2.1%)    | 63     | 63 ( 2.2%)    |
| Alopecia                                                            | 0      | 0             | 1      | 1 ( <0.1%)    | 1      | 1 ( <0.1%)    |
| Chloasma                                                            | 0      | 0             | 1      | 1 ( <0.1%)    | 1      | 1 ( <0.1%)    |
| Cutaneous lupus erythematosus                                       | 0      | 0             | 2      | 2 ( 0.1%)     | 2      | 2 ( <0.1%)    |
| Dermal cyst                                                         | 0      | 0             | 1      | 1 ( <0.1%)    | 1      | 1 ( <0.1%)    |
| Dermatitis                                                          | 1      | 1 ( <0.1%)    | 2      | 2 ( 0.1%)     | 3      | 3 ( 0.1%)     |
| Dermatitis allergic                                                 | 1      | 1 ( <0.1%)    | 1      | 1 ( <0.1%)    | 2      | 2 ( <0.1%)    |
| Dermatitis atopic                                                   | 7      | 7 ( 0.5%)     | 6      | 6 ( 0.4%)     | 13     | 13 ( 0.5%)    |
| Dermatitis contact                                                  | 0      | 0             | 1      | 1 ( <0.1%)    | 1      | 1 ( <0.1%)    |
| Dry skin                                                            | 1      | 1 ( <0.1%)    | 3      | 3 ( 0.2%)     | 4      | 4 ( 0.1%)     |
| Ecchymosis                                                          | 0      | 0             | 1      | 1 ( <0.1%)    | 1      | 1 ( <0.1%)    |
| Eczema                                                              | 10     | 10 ( 0.7%)    | 9      | 9 ( 0.6%)     | 19     | 19 ( 0.7%)    |
| Hirsutism                                                           | 4      | 4 ( 0.3%)     | 1      | 1 ( <0.1%)    | 5      | 5 ( 0.2%)     |
| Hyperhidrosis                                                       | 1      | 1 ( <0.1%)    | 0      | 0             | 1      | 1 ( <0.1%)    |
| Hypertrichosis                                                      | 0      | 0             | 1      | 1 ( <0.1%)    | 1      | 1 ( <0.1%)    |
| Increased tendency to bruise                                        | 0      | 0             | 1      | 1 ( <0.1%)    | 1      | 1 ( <0.1%)    |
| Keloid scar                                                         | 0      | 0             | 1      | 1 ( <0.1%)    | 1      | 1 ( <0.1%)    |
| Lichen sclerosus                                                    | 0      | 0             | 1      | 1 ( <0.1%)    | 1      | 1 ( <0.1%)    |
| Psoriasis                                                           | 4      | 4 ( 0.3%)     | 7      | 7 ( 0.5%)     | 11     | 11 ( 0.4%)    |
| Purpura                                                             | 1      | 1 ( <0.1%)    | 0      | 0             | 1      | 1 ( <0.1%)    |
| Rash                                                                | 2      | 1 ( <0.1%)    | 4      | 4 ( 0.3%)     | 6      | 5 ( 0.2%)     |
| Rash generalised                                                    | 1      | 1 ( <0.1%)    | 0      | 0             | 1      | 1 ( <0.1%)    |
| Rosacea                                                             | 1      | 1 ( <0.1%)    | 3      | 3 ( 0.2%)     | 4      | 4 ( 0.1%)     |
| Scar                                                                | 2      | 2 ( 0.1%)     | 2      | 2 ( 0.1%)     | 4      | 4 ( 0.1%)     |
| Skin hypertrophy                                                    | 0      | 0             | 1      | 1 ( <0.1%)    | 1      | 1 ( <0.1%)    |
| Skin irritation                                                     | 1      | 1 ( <0.1%)    | 0      | 0             | 1      | 1 ( <0.1%)    |
| Urticaria                                                           | 2      | 2 ( 0.1%)     | 1      | 1 ( <0.1%)    | 3      | 3 ( 0.1%)     |
| Social circumstances                                                | 1      | 1 ( <0.1%)    | 4      | 4 ( 0.3%)     | 5      | 5 ( 0.2%)     |
| Corrective lens user                                                | 1      | 1 ( <0.1%)    | 4      | 4 ( 0.3%)     | 5      | 5 ( 0.2%)     |

**Table 14.3.1 / 2: Number of subjects with baseline findings and number of baseline findings by MedDRA SOC/PT (FAS)**

| Primary system organ class<br>Preferred term<br>MedDRA version 14.0 | LCS12  |               | LCS16  |               | Total  |               |
|---------------------------------------------------------------------|--------|---------------|--------|---------------|--------|---------------|
|                                                                     | Events | N=1432 (100%) | Events | N=1452 (100%) | Events | N=2884 (100%) |
| Surgical and medical procedures                                     | 8      | 8 ( 0.6%)     | 5      | 5 ( 0.3%)     | 13     | 13 ( 0.5%)    |
| Abortion induced                                                    | 0      | 0             | 1      | 1 ( <0.1%)    | 1      | 1 ( <0.1%)    |
| Breast prosthesis implantation                                      | 1      | 1 ( <0.1%)    | 0      | 0             | 1      | 1 ( <0.1%)    |
| Contraception                                                       | 1      | 1 ( <0.1%)    | 0      | 0             | 1      | 1 ( <0.1%)    |
| Ear tube insertion                                                  | 1      | 1 ( <0.1%)    | 0      | 0             | 1      | 1 ( <0.1%)    |
| Endodontic procedure                                                | 1      | 1 ( <0.1%)    | 0      | 0             | 1      | 1 ( <0.1%)    |
| Mammoplasty                                                         | 1      | 1 ( <0.1%)    | 1      | 1 ( <0.1%)    | 2      | 2 ( <0.1%)    |
| Medical device removal                                              | 0      | 0             | 1      | 1 ( <0.1%)    | 1      | 1 ( <0.1%)    |
| Mole excision                                                       | 0      | 0             | 1      | 1 ( <0.1%)    | 1      | 1 ( <0.1%)    |
| Obesity surgery                                                     | 1      | 1 ( <0.1%)    | 0      | 0             | 1      | 1 ( <0.1%)    |
| Oral contraception                                                  | 0      | 0             | 1      | 1 ( <0.1%)    | 1      | 1 ( <0.1%)    |
| Pterygium operation                                                 | 1      | 1 ( <0.1%)    | 0      | 0             | 1      | 1 ( <0.1%)    |
| Tonsillectomy                                                       | 1      | 1 ( <0.1%)    | 0      | 0             | 1      | 1 ( <0.1%)    |
| Vascular disorders                                                  | 21     | 21 ( 1.5%)    | 21     | 20 ( 1.4%)    | 42     | 41 ( 1.4%)    |
| Hot flush                                                           | 0      | 0             | 1      | 1 ( <0.1%)    | 1      | 1 ( <0.1%)    |
| Hypertension                                                        | 16     | 16 ( 1.1%)    | 12     | 12 ( 0.8%)    | 28     | 28 ( 1.0%)    |
| Hypotension                                                         | 2      | 2 ( 0.1%)     | 4      | 4 ( 0.3%)     | 6      | 6 ( 0.2%)     |
| Orthostatic hypotension                                             | 0      | 0             | 1      | 1 ( <0.1%)    | 1      | 1 ( <0.1%)    |
| Raynaud's phenomenon                                                | 0      | 0             | 1      | 1 ( <0.1%)    | 1      | 1 ( <0.1%)    |
| Varicose vein                                                       | 3      | 3 ( 0.2%)     | 2      | 2 ( 0.1%)     | 5      | 5 ( 0.2%)     |

Note: Adverse events are sorted in alphabetical order by primary SOC and preferred term.

Global Biostatistics: /by-sasp/patdb/projects/de04209/310442/stat/prod\_interim03/pgms/t-basfin.sas epkl 12OCT2011 11:19

End of table

**Table 14.3.1 / 3: Listing of serious baseline findings by subject (FAS)**

| TREATMENT | Subject number | BF specification | BF onset<br>date | BF stop<br>date | BF still continuing | BF intensity |
|-----------|----------------|------------------|------------------|-----------------|---------------------|--------------|
| LCS12     | 160637         | UNSPECIFIC PAIN  | .                | .               | yes                 | moderate     |

Global Biostatistics: /by-sasp/patdb/projects/de04209/310442/stat/prod\_interim03/pgms/t-basfin.sas epkl 12OCT2011 11:19  
End of table

**Table 14.3.1 / 4: Number of subjects with baseline findings or medical history by MedDRA SOC/PT (FAS)**

| Primary system organ class<br>Preferred term<br>MedDRA version 14.0 | LCS12<br>N=1432 (100%) | LCS16<br>N=1452 (100%) | Total<br>N=2884 (100%) |
|---------------------------------------------------------------------|------------------------|------------------------|------------------------|
| Number of subjects (%) with at least one such event                 | 1236 ( 86.3%)          | 1258 ( 86.6%)          | 2494 ( 86.5%)          |
| <b>Blood and lymphatic system disorders</b>                         | <b>42 ( 2.9%)</b>      | <b>56 ( 3.9%)</b>      | <b>98 ( 3.4%)</b>      |
| Activated protein C resistance                                      | 1 ( <0.1%)             | 0                      | 1 ( <0.1%)             |
| Anaemia                                                             | 32 ( 2.2%)             | 47 ( 3.2%)             | 79 ( 2.7%)             |
| Anaemia of pregnancy                                                | 3 ( 0.2%)              | 0                      | 3 ( 0.1%)              |
| Coagulopathy                                                        | 1 ( <0.1%)             | 0                      | 1 ( <0.1%)             |
| Haemoconcentration                                                  | 0                      | 1 ( <0.1%)             | 1 ( <0.1%)             |
| Idiopathic thrombocytopenic purpura                                 | 0                      | 1 ( <0.1%)             | 1 ( <0.1%)             |
| Iron deficiency anaemia                                             | 2 ( 0.1%)              | 3 ( 0.2%)              | 5 ( 0.2%)              |
| Lymphadenitis                                                       | 0                      | 2 ( 0.1%)              | 2 ( <0.1%)             |
| Lymphadenopathy                                                     | 0                      | 4 ( 0.3%)              | 4 ( 0.1%)              |
| Lymphoid tissue hyperplasia                                         | 1 ( <0.1%)             | 0                      | 1 ( <0.1%)             |
| Pernicious anaemia                                                  | 1 ( <0.1%)             | 0                      | 1 ( <0.1%)             |
| Splenomegaly                                                        | 1 ( <0.1%)             | 0                      | 1 ( <0.1%)             |
| Thrombocytopenia                                                    | 1 ( <0.1%)             | 0                      | 1 ( <0.1%)             |
| Thrombocytosis                                                      | 0                      | 1 ( <0.1%)             | 1 ( <0.1%)             |
| <b>Cardiac disorders</b>                                            | <b>10 ( 0.7%)</b>      | <b>28 ( 1.9%)</b>      | <b>38 ( 1.3%)</b>      |
| Angina pectoris                                                     | 0                      | 1 ( <0.1%)             | 1 ( <0.1%)             |
| Aortic valve disease                                                | 0                      | 1 ( <0.1%)             | 1 ( <0.1%)             |
| Arrhythmia                                                          | 2 ( 0.1%)              | 4 ( 0.3%)              | 6 ( 0.2%)              |
| Extrasystoles                                                       | 1 ( <0.1%)             | 1 ( <0.1%)             | 2 ( <0.1%)             |
| Long QT syndrome                                                    | 0                      | 1 ( <0.1%)             | 1 ( <0.1%)             |
| Mitral valve disease                                                | 0                      | 1 ( <0.1%)             | 1 ( <0.1%)             |
| Mitral valve incompetence                                           | 0                      | 1 ( <0.1%)             | 1 ( <0.1%)             |
| Mitral valve prolapse                                               | 5 ( 0.3%)              | 7 ( 0.5%)              | 12 ( 0.4%)             |
| Myocarditis                                                         | 1 ( <0.1%)             | 1 ( <0.1%)             | 2 ( <0.1%)             |
| Palpitations                                                        | 1 ( <0.1%)             | 4 ( 0.3%)              | 5 ( 0.2%)              |
| Pulmonary valve stenosis                                            | 0                      | 1 ( <0.1%)             | 1 ( <0.1%)             |
| Supraventricular tachycardia                                        | 0                      | 3 ( 0.2%)              | 3 ( 0.1%)              |
| Tachycardia                                                         | 1 ( <0.1%)             | 5 ( 0.3%)              | 6 ( 0.2%)              |
| Wolff-Parkinson-White syndrome                                      | 0                      | 1 ( <0.1%)             | 1 ( <0.1%)             |

**Table 14.3.1 / 4: Number of subjects with baseline findings or medical history by MedDRA SOC/PT (FAS)**

| Primary system organ class<br>Preferred term<br>MedDRA version 14.0 | LCS12<br>N=1432 (100%) | LCS16<br>N=1452 (100%) | Total<br>N=2884 (100%) |
|---------------------------------------------------------------------|------------------------|------------------------|------------------------|
| Congenital, familial and genetic disorders                          | 25 ( 1.7%)             | 25 ( 1.7%)             | 50 ( 1.7%)             |
| Accessory breast                                                    | 0                      | 1 (<0.1%)              | 1 (<0.1%)              |
| Anomaly of external ear congenital                                  | 0                      | 1 (<0.1%)              | 1 (<0.1%)              |
| Atrial septal defect                                                | 1 (<0.1%)              | 0                      | 1 (<0.1%)              |
| Bicuspid aortic valve                                               | 0                      | 1 (<0.1%)              | 1 (<0.1%)              |
| Birth mark                                                          | 0                      | 1 (<0.1%)              | 1 (<0.1%)              |
| Branchial cleft cyst                                                | 1 (<0.1%)              | 0                      | 1 (<0.1%)              |
| Congenital foot malformation                                        | 1 (<0.1%)              | 1 (<0.1%)              | 2 (<0.1%)              |
| Congenital hand malformation                                        | 0                      | 1 (<0.1%)              | 1 (<0.1%)              |
| Congenital intestinal malformation                                  | 0                      | 1 (<0.1%)              | 1 (<0.1%)              |
| Congenital knee deformity                                           | 1 (<0.1%)              | 0                      | 1 (<0.1%)              |
| Congenital ureteric anomaly                                         | 0                      | 1 (<0.1%)              | 1 (<0.1%)              |
| Deafness congenital                                                 | 0                      | 1 (<0.1%)              | 1 (<0.1%)              |
| Dermoid cyst                                                        | 0                      | 1 (<0.1%)              | 1 (<0.1%)              |
| Ehlers-Danlos syndrome                                              | 2 ( 0.1%)              | 0                      | 2 (<0.1%)              |
| Factor V Leiden mutation                                            | 2 ( 0.1%)              | 2 ( 0.1%)              | 4 ( 0.1%)              |
| Fibrous dysplasia of bone                                           | 0                      | 1 (<0.1%)              | 1 (<0.1%)              |
| Foetal malformation                                                 | 0                      | 1 (<0.1%)              | 1 (<0.1%)              |
| Gene mutation                                                       | 1 (<0.1%)              | 0                      | 1 (<0.1%)              |
| Gilbert's syndrome                                                  | 1 (<0.1%)              | 0                      | 1 (<0.1%)              |
| Haemangioma congenital                                              | 1 (<0.1%)              | 0                      | 1 (<0.1%)              |
| Hereditary spherocytosis                                            | 1 (<0.1%)              | 0                      | 1 (<0.1%)              |
| Hip dysplasia                                                       | 3 ( 0.2%)              | 0                      | 3 ( 0.1%)              |
| Pelvic kidney                                                       | 1 (<0.1%)              | 0                      | 1 (<0.1%)              |
| Peroneal muscular atrophy                                           | 0                      | 1 (<0.1%)              | 1 (<0.1%)              |
| Protein S deficiency                                                | 1 (<0.1%)              | 0                      | 1 (<0.1%)              |
| Pulmonary malformation                                              | 1 (<0.1%)              | 0                      | 1 (<0.1%)              |
| Pyloric stenosis                                                    | 1 (<0.1%)              | 0                      | 1 (<0.1%)              |
| Retinal anomaly congenital                                          | 1 (<0.1%)              | 0                      | 1 (<0.1%)              |
| Sickle cell trait                                                   | 1 (<0.1%)              | 3 ( 0.2%)              | 4 ( 0.1%)              |
| Solitary kidney                                                     | 0                      | 1 (<0.1%)              | 1 (<0.1%)              |
| Syndactyly                                                          | 1 (<0.1%)              | 0                      | 1 (<0.1%)              |
| Talipes                                                             | 1 (<0.1%)              | 0                      | 1 (<0.1%)              |
| Urethral intrinsic sphincter deficiency                             | 1 (<0.1%)              | 0                      | 1 (<0.1%)              |
| Ventricular septal defect                                           | 2 ( 0.1%)              | 3 ( 0.2%)              | 5 ( 0.2%)              |
| Von Willebrand's disease                                            | 1 (<0.1%)              | 4 ( 0.3%)              | 5 ( 0.2%)              |

**Table 14.3.1 / 4: Number of subjects with baseline findings or medical history by MedDRA SOC/PT (FAS)**

| Primary system organ class       | LCS12         | LCS16         | Total         |
|----------------------------------|---------------|---------------|---------------|
| Preferred term                   | N=1432 (100%) | N=1452 (100%) | N=2884 (100%) |
| MedDRA version 14.0              |               |               |               |
| Ear and labyrinth disorders      | 19 ( 1.3%)    | 10 ( 0.7%)    | 29 ( 1.0%)    |
| Cerumen impaction                | 0             | 1 (<0.1%)     | 1 (<0.1%)     |
| Deafness bilateral               | 2 ( 0.1%)     | 0             | 2 (<0.1%)     |
| Ear discomfort                   | 1 (<0.1%)     | 0             | 1 (<0.1%)     |
| Hearing impaired                 | 1 (<0.1%)     | 1 (<0.1%)     | 2 (<0.1%)     |
| Hypoacusis                       | 1 (<0.1%)     | 0             | 1 (<0.1%)     |
| Meniere's disease                | 2 ( 0.1%)     | 0             | 2 (<0.1%)     |
| Motion sickness                  | 2 ( 0.1%)     | 1 (<0.1%)     | 3 ( 0.1%)     |
| Otosclerosis                     | 0             | 1 (<0.1%)     | 1 (<0.1%)     |
| Tinnitus                         | 4 ( 0.3%)     | 2 ( 0.1%)     | 6 ( 0.2%)     |
| Tympanic membrane perforation    | 6 ( 0.4%)     | 1 (<0.1%)     | 7 ( 0.2%)     |
| Tympanic membrane scarring       | 1 (<0.1%)     | 0             | 1 (<0.1%)     |
| Vertigo                          | 1 (<0.1%)     | 3 ( 0.2%)     | 4 ( 0.1%)     |
| Endocrine disorders              | 42 ( 2.9%)    | 48 ( 3.3%)    | 90 ( 3.1%)    |
| Basedow's disease                | 1 (<0.1%)     | 0             | 1 (<0.1%)     |
| Goitre                           | 3 ( 0.2%)     | 6 ( 0.4%)     | 9 ( 0.3%)     |
| Hyperprolactinaemia              | 0             | 3 ( 0.2%)     | 3 ( 0.1%)     |
| Hyperthyroidism                  | 6 ( 0.4%)     | 3 ( 0.2%)     | 9 ( 0.3%)     |
| Hypothyroidism                   | 31 ( 2.2%)    | 36 ( 2.5%)    | 67 ( 2.3%)    |
| Primary hyperaldosteronism       | 1 (<0.1%)     | 0             | 1 (<0.1%)     |
| Thyroid cyst                     | 2 ( 0.1%)     | 0             | 2 (<0.1%)     |
| Thyroid dysfunction in pregnancy | 0             | 1 (<0.1%)     | 1 (<0.1%)     |
| Thyroiditis                      | 1 (<0.1%)     | 4 ( 0.3%)     | 5 ( 0.2%)     |

**Table 14.3.1 / 4: Number of subjects with baseline findings or medical history by MedDRA SOC/PT (FAS)**

| Primary system organ class<br>Preferred term<br>MedDRA version 14.0 | LCS12<br>N=1432 (100%) | LCS16<br>N=1452 (100%) | Total<br>N=2884 (100%) |
|---------------------------------------------------------------------|------------------------|------------------------|------------------------|
| Eye disorders                                                       | 83 ( 5.8%)             | 95 ( 6.5%)             | 178 ( 6.2%)            |
| Amblyopia                                                           | 0                      | 3 ( 0.2%)              | 3 ( 0.1%)              |
| Asthenopia                                                          | 1 ( <0.1%)             | 1 ( <0.1%)             | 2 ( <0.1%)             |
| Astigmatism                                                         | 7 ( 0.5%)              | 15 ( 1.0%)             | 22 ( 0.8%)             |
| Blepharitis                                                         | 1 ( <0.1%)             | 0                      | 1 ( <0.1%)             |
| Chalazion                                                           | 0                      | 1 ( <0.1%)             | 1 ( <0.1%)             |
| Conjunctivitis                                                      | 2 ( 0.1%)              | 4 ( 0.3%)              | 6 ( 0.2%)              |
| Conjunctivitis allergic                                             | 1 ( <0.1%)             | 1 ( <0.1%)             | 2 ( <0.1%)             |
| Dry eye                                                             | 1 ( <0.1%)             | 3 ( 0.2%)              | 4 ( 0.1%)              |
| Ectropion                                                           | 0                      | 1 ( <0.1%)             | 1 ( <0.1%)             |
| Eye allergy                                                         | 0                      | 1 ( <0.1%)             | 1 ( <0.1%)             |
| Eye pruritus                                                        | 0                      | 1 ( <0.1%)             | 1 ( <0.1%)             |
| Eyelid ptosis                                                       | 1 ( <0.1%)             | 0                      | 1 ( <0.1%)             |
| Hypermetropia                                                       | 9 ( 0.6%)              | 9 ( 0.6%)              | 18 ( 0.6%)             |
| Iritis                                                              | 1 ( <0.1%)             | 1 ( <0.1%)             | 2 ( <0.1%)             |
| Keratoconus                                                         | 1 ( <0.1%)             | 0                      | 1 ( <0.1%)             |
| Myopia                                                              | 59 ( 4.1%)             | 56 ( 3.9%)             | 115 ( 4.0%)            |
| Papilloedema                                                        | 1 ( <0.1%)             | 0                      | 1 ( <0.1%)             |
| Presbyopia                                                          | 0                      | 1 ( <0.1%)             | 1 ( <0.1%)             |
| Refraction disorder                                                 | 0                      | 1 ( <0.1%)             | 1 ( <0.1%)             |
| Retinal detachment                                                  | 1 ( <0.1%)             | 0                      | 1 ( <0.1%)             |
| Scotoma                                                             | 1 ( <0.1%)             | 0                      | 1 ( <0.1%)             |
| Strabismus                                                          | 0                      | 3 ( 0.2%)              | 3 ( 0.1%)              |
| Ulcerative keratitis                                                | 2 ( 0.1%)              | 0                      | 2 ( <0.1%)             |
| Vision blurred                                                      | 0                      | 2 ( 0.1%)              | 2 ( <0.1%)             |
| Visual acuity reduced                                               | 1 ( <0.1%)             | 1 ( <0.1%)             | 2 ( <0.1%)             |

**Table 14.3.1 / 4: Number of subjects with baseline findings or medical history by MedDRA SOC/PT (FAS)**

| Primary system organ class<br>Preferred term<br>MedDRA version 14.0 | LCS12<br>N=1432 (100%) | LCS16<br>N=1452 (100%) | Total<br>N=2884 (100%) |
|---------------------------------------------------------------------|------------------------|------------------------|------------------------|
| Gastrointestinal disorders                                          | 172 ( 12.0%)           | 149 ( 10.3%)           | 321 ( 11.1%)           |
| Abdominal discomfort                                                | 1 ( <0.1%)             | 2 ( 0.1%)              | 3 ( 0.1%)              |
| Abdominal distension                                                | 2 ( 0.1%)              | 2 ( 0.1%)              | 4 ( 0.1%)              |
| Abdominal hernia                                                    | 1 ( <0.1%)             | 0                      | 1 ( <0.1%)             |
| Abdominal pain                                                      | 15 ( 1.0%)             | 8 ( 0.6%)              | 23 ( 0.8%)             |
| Abdominal pain lower                                                | 1 ( <0.1%)             | 4 ( 0.3%)              | 5 ( 0.2%)              |
| Abdominal pain upper                                                | 2 ( 0.1%)              | 5 ( 0.3%)              | 7 ( 0.2%)              |
| Abdominal wall cyst                                                 | 1 ( <0.1%)             | 0                      | 1 ( <0.1%)             |
| Anal fissure                                                        | 1 ( <0.1%)             | 1 ( <0.1%)             | 2 ( <0.1%)             |
| Anal fistula                                                        | 0                      | 1 ( <0.1%)             | 1 ( <0.1%)             |
| Bezoar                                                              | 1 ( <0.1%)             | 0                      | 1 ( <0.1%)             |
| Bowel movement irregularity                                         | 0                      | 1 ( <0.1%)             | 1 ( <0.1%)             |
| Coeliac disease                                                     | 5 ( 0.3%)              | 3 ( 0.2%)              | 8 ( 0.3%)              |
| Colitis                                                             | 2 ( 0.1%)              | 0                      | 2 ( <0.1%)             |
| Colitis ulcerative                                                  | 5 ( 0.3%)              | 3 ( 0.2%)              | 8 ( 0.3%)              |
| Constipation                                                        | 22 ( 1.5%)             | 22 ( 1.5%)             | 44 ( 1.5%)             |
| Crohn's disease                                                     | 3 ( 0.2%)              | 1 ( <0.1%)             | 4 ( 0.1%)              |
| Dental caries                                                       | 0                      | 1 ( <0.1%)             | 1 ( <0.1%)             |
| Diarrhoea                                                           | 9 ( 0.6%)              | 5 ( 0.3%)              | 14 ( 0.5%)             |
| Dyspepsia                                                           | 17 ( 1.2%)             | 12 ( 0.8%)             | 29 ( 1.0%)             |
| Dysphagia                                                           | 0                      | 2 ( 0.1%)              | 2 ( <0.1%)             |
| Faecal incontinence                                                 | 1 ( <0.1%)             | 0                      | 1 ( <0.1%)             |
| Femoral hernia                                                      | 0                      | 1 ( <0.1%)             | 1 ( <0.1%)             |
| Flatulence                                                          | 3 ( 0.2%)              | 1 ( <0.1%)             | 4 ( 0.1%)              |
| Food poisoning                                                      | 0                      | 1 ( <0.1%)             | 1 ( <0.1%)             |
| Gastric disorder                                                    | 2 ( 0.1%)              | 0                      | 2 ( <0.1%)             |
| Gastric ulcer                                                       | 7 ( 0.5%)              | 2 ( 0.1%)              | 9 ( 0.3%)              |
| Gastritis                                                           | 13 ( 0.9%)             | 11 ( 0.8%)             | 24 ( 0.8%)             |
| Gastrointestinal ulcer                                              | 0                      | 3 ( 0.2%)              | 3 ( 0.1%)              |
| Gastroesophageal reflux disease                                     | 21 ( 1.5%)             | 21 ( 1.4%)             | 42 ( 1.5%)             |
| Glossitis                                                           | 1 ( <0.1%)             | 0                      | 1 ( <0.1%)             |
| Haemorrhoids                                                        | 12 ( 0.8%)             | 7 ( 0.5%)              | 19 ( 0.7%)             |
| Hiatus hernia                                                       | 2 ( 0.1%)              | 2 ( 0.1%)              | 4 ( 0.1%)              |
| Ileus                                                               | 1 ( <0.1%)             | 0                      | 1 ( <0.1%)             |
| Impaired gastric emptying                                           | 1 ( <0.1%)             | 0                      | 1 ( <0.1%)             |
| Inguinal hernia                                                     | 4 ( 0.3%)              | 4 ( 0.3%)              | 8 ( 0.3%)              |
| Irritable bowel syndrome                                            | 36 ( 2.5%)             | 21 ( 1.4%)             | 57 ( 2.0%)             |
| Ischiorectal hernia                                                 | 0                      | 1 ( <0.1%)             | 1 ( <0.1%)             |
| Malocclusion                                                        | 2 ( 0.1%)              | 0                      | 2 ( <0.1%)             |
| Nausea                                                              | 4 ( 0.3%)              | 8 ( 0.6%)              | 12 ( 0.4%)             |
| Necrotising colitis                                                 | 1 ( <0.1%)             | 0                      | 1 ( <0.1%)             |
| Oesophagitis                                                        | 0                      | 1 ( <0.1%)             | 1 ( <0.1%)             |
| Pancreatitis                                                        | 0                      | 2 ( 0.1%)              | 2 ( <0.1%)             |
| Pancreatitis acute                                                  | 0                      | 1 ( <0.1%)             | 1 ( <0.1%)             |



**Table 14.3.1 / 4: Number of subjects with baseline findings or medical history by MedDRA SOC/PT (FAS)**

| Primary system organ class                                  | LCS12             | LCS16             | Total             |
|-------------------------------------------------------------|-------------------|-------------------|-------------------|
| Preferred term                                              | N=1432 (100%)     | N=1452 (100%)     | N=2884 (100%)     |
| MedDRA version 14.0                                         |                   |                   |                   |
| Parotid gland inflammation                                  | 0                 | 1 (<0.1%)         | 1 (<0.1%)         |
| Peptic ulcer                                                | 1 (<0.1%)         | 0                 | 1 (<0.1%)         |
| Periodontitis                                               | 0                 | 1 (<0.1%)         | 1 (<0.1%)         |
| Peritonitis                                                 | 0                 | 1 (<0.1%)         | 1 (<0.1%)         |
| Proctalgia                                                  | 1 (<0.1%)         | 0                 | 1 (<0.1%)         |
| Rectal fissure                                              | 1 (<0.1%)         | 1 (<0.1%)         | 2 (<0.1%)         |
| Rectal haemorrhage                                          | 0                 | 2 ( 0.1%)         | 2 (<0.1%)         |
| Reflux oesophagitis                                         | 1 (<0.1%)         | 0                 | 1 (<0.1%)         |
| Tooth disorder                                              | 1 (<0.1%)         | 0                 | 1 (<0.1%)         |
| Tooth impacted                                              | 0                 | 2 ( 0.1%)         | 2 (<0.1%)         |
| Toothache                                                   | 2 ( 0.1%)         | 3 ( 0.2%)         | 5 ( 0.2%)         |
| Umbilical hernia                                            | 4 ( 0.3%)         | 2 ( 0.1%)         | 6 ( 0.2%)         |
| Vomiting                                                    | 0                 | 1 (<0.1%)         | 1 (<0.1%)         |
| <b>General disorders and administration site conditions</b> | <b>37 ( 2.6%)</b> | <b>25 ( 1.7%)</b> | <b>62 ( 2.1%)</b> |
| Asthenia                                                    | 3 ( 0.2%)         | 1 (<0.1%)         | 4 ( 0.1%)         |
| Capsular contracture associated with breast implant         | 0                 | 1 (<0.1%)         | 1 (<0.1%)         |
| Chest discomfort                                            | 1 (<0.1%)         | 0                 | 1 (<0.1%)         |
| Chest pain                                                  | 1 (<0.1%)         | 2 ( 0.1%)         | 3 ( 0.1%)         |
| Chronic fatigue syndrome                                    | 1 (<0.1%)         | 0                 | 1 (<0.1%)         |
| Cyst                                                        | 2 ( 0.1%)         | 1 (<0.1%)         | 3 ( 0.1%)         |
| Device difficult to use                                     | 1 (<0.1%)         | 0                 | 1 (<0.1%)         |
| Device dislocation                                          | 0                 | 1 (<0.1%)         | 1 (<0.1%)         |
| Drug intolerance                                            | 2 ( 0.1%)         | 1 (<0.1%)         | 3 ( 0.1%)         |
| Facial pain                                                 | 1 (<0.1%)         | 0                 | 1 (<0.1%)         |
| Fatigue                                                     | 9 ( 0.6%)         | 5 ( 0.3%)         | 14 ( 0.5%)        |
| Haemorrhagic cyst                                           | 1 (<0.1%)         | 0                 | 1 (<0.1%)         |
| Hernia                                                      | 3 ( 0.2%)         | 2 ( 0.1%)         | 5 ( 0.2%)         |
| Influenza like illness                                      | 1 (<0.1%)         | 0                 | 1 (<0.1%)         |
| Irritability                                                | 1 (<0.1%)         | 2 ( 0.1%)         | 3 ( 0.1%)         |
| Medical device pain                                         | 1 (<0.1%)         | 0                 | 1 (<0.1%)         |
| Metaplasia                                                  | 0                 | 1 (<0.1%)         | 1 (<0.1%)         |
| Oedema peripheral                                           | 2 ( 0.1%)         | 2 ( 0.1%)         | 4 ( 0.1%)         |
| Pain                                                        | 7 ( 0.5%)         | 6 ( 0.4%)         | 13 ( 0.5%)        |
| Pyrexia                                                     | 1 (<0.1%)         | 1 (<0.1%)         | 2 (<0.1%)         |
| Unevaluable event                                           | 1 (<0.1%)         | 0                 | 1 (<0.1%)         |

**Table 14.3.1 / 4: Number of subjects with baseline findings or medical history by MedDRA SOC/PT (FAS)**

| Primary system organ class | LCS12         | LCS16         | Total         |
|----------------------------|---------------|---------------|---------------|
| Preferred term             | N=1432 (100%) | N=1452 (100%) | N=2884 (100%) |
| MedDRA version 14.0        |               |               |               |
| Hepatobiliary disorders    | 23 ( 1.6%)    | 20 ( 1.4%)    | 43 ( 1.5%)    |
| Cholecystitis              | 0             | 3 ( 0.2%)     | 3 ( 0.1%)     |
| Cholelithiasis             | 16 ( 1.1%)    | 12 ( 0.8%)    | 28 ( 1.0%)    |
| Cholestasis                | 0             | 1 (<0.1%)     | 1 (<0.1%)     |
| Cholestasis of pregnancy   | 3 ( 0.2%)     | 0             | 3 ( 0.1%)     |
| Gallbladder disorder       | 3 ( 0.2%)     | 1 (<0.1%)     | 4 ( 0.1%)     |
| Hepatic steatosis          | 1 (<0.1%)     | 2 ( 0.1%)     | 3 ( 0.1%)     |
| Hepatitis                  | 0             | 1 (<0.1%)     | 1 (<0.1%)     |
| Immune system disorders    | 283 ( 19.8%)  | 310 ( 21.3%)  | 593 ( 20.6%)  |
| Allergy to animal          | 23 ( 1.6%)    | 35 ( 2.4%)    | 58 ( 2.0%)    |
| Allergy to arthropod bite  | 0             | 1 (<0.1%)     | 1 (<0.1%)     |
| Allergy to arthropod sting | 5 ( 0.3%)     | 1 (<0.1%)     | 6 ( 0.2%)     |
| Allergy to chemicals       | 1 (<0.1%)     | 5 ( 0.3%)     | 6 ( 0.2%)     |
| Allergy to metals          | 9 ( 0.6%)     | 7 ( 0.5%)     | 16 ( 0.6%)    |
| Allergy to plants          | 1 (<0.1%)     | 1 (<0.1%)     | 2 (<0.1%)     |
| Allergy to vaccine         | 1 (<0.1%)     | 1 (<0.1%)     | 2 (<0.1%)     |
| Anaphylactic shock         | 1 (<0.1%)     | 0             | 1 (<0.1%)     |
| Atopy                      | 7 ( 0.5%)     | 5 ( 0.3%)     | 12 ( 0.4%)    |
| Drug hypersensitivity      | 100 ( 7.0%)   | 103 ( 7.1%)   | 203 ( 7.0%)   |
| Food allergy               | 19 ( 1.3%)    | 28 ( 1.9%)    | 47 ( 1.6%)    |
| House dust allergy         | 12 ( 0.8%)    | 10 ( 0.7%)    | 22 ( 0.8%)    |
| Hypersensitivity           | 18 ( 1.3%)    | 24 ( 1.7%)    | 42 ( 1.5%)    |
| Iodine allergy             | 0             | 3 ( 0.2%)     | 3 ( 0.1%)     |
| Latex allergy              | 3 ( 0.2%)     | 9 ( 0.6%)     | 12 ( 0.4%)    |
| Milk allergy               | 1 (<0.1%)     | 2 ( 0.1%)     | 3 ( 0.1%)     |
| Multiple allergies         | 3 ( 0.2%)     | 5 ( 0.3%)     | 8 ( 0.3%)     |
| Mycotic allergy            | 1 (<0.1%)     | 2 ( 0.1%)     | 3 ( 0.1%)     |
| Perennial allergy          | 0             | 1 (<0.1%)     | 1 (<0.1%)     |
| Perfume sensitivity        | 1 (<0.1%)     | 0             | 1 (<0.1%)     |
| Seasonal allergy           | 145 ( 10.1%)  | 154 ( 10.6%)  | 299 ( 10.4%)  |

**Table 14.3.1 / 4: Number of subjects with baseline findings or medical history by MedDRA SOC/PT (FAS)**

| Primary system organ class<br>Preferred term<br>MedDRA version 14.0 | LCS12<br>N=1432 (100%) | LCS16<br>N=1452 (100%) | Total<br>N=2884 (100%) |
|---------------------------------------------------------------------|------------------------|------------------------|------------------------|
| Infections and infestations                                         | 478 ( 33.4%)           | 452 ( 31.1%)           | 930 ( 32.2%)           |
| Acute tonsillitis                                                   | 2 ( 0.1%)              | 2 ( 0.1%)              | 4 ( 0.1%)              |
| Anogenital warts                                                    | 29 ( 2.0%)             | 12 ( 0.8%)             | 41 ( 1.4%)             |
| Appendicitis                                                        | 28 ( 2.0%)             | 25 ( 1.7%)             | 53 ( 1.8%)             |
| Appendicitis perforated                                             | 1 (<0.1%)              | 0                      | 1 (<0.1%)              |
| Bacteriuria                                                         | 1 (<0.1%)              | 0                      | 1 (<0.1%)              |
| Body tinea                                                          | 1 (<0.1%)              | 0                      | 1 (<0.1%)              |
| Breast abscess                                                      | 1 (<0.1%)              | 2 ( 0.1%)              | 3 ( 0.1%)              |
| Breast infection                                                    | 1 (<0.1%)              | 0                      | 1 (<0.1%)              |
| Bronchitis                                                          | 10 ( 0.7%)             | 13 ( 0.9%)             | 23 ( 0.8%)             |
| Candidiasis                                                         | 5 ( 0.3%)              | 7 ( 0.5%)              | 12 ( 0.4%)             |
| Cellulitis                                                          | 1 (<0.1%)              | 2 ( 0.1%)              | 3 ( 0.1%)              |
| Cervicitis                                                          | 5 ( 0.3%)              | 7 ( 0.5%)              | 12 ( 0.4%)             |
| Cervicitis gonococcal                                               | 1 (<0.1%)              | 0                      | 1 (<0.1%)              |
| Cervicitis trichomonal                                              | 1 (<0.1%)              | 0                      | 1 (<0.1%)              |
| Chlamydial cervicitis                                               | 21 ( 1.5%)             | 21 ( 1.4%)             | 42 ( 1.5%)             |
| Chlamydial infection                                                | 10 ( 0.7%)             | 13 ( 0.9%)             | 23 ( 0.8%)             |
| Chronic sinusitis                                                   | 9 ( 0.6%)              | 2 ( 0.1%)              | 11 ( 0.4%)             |
| Chronic tonsillitis                                                 | 6 ( 0.4%)              | 6 ( 0.4%)              | 12 ( 0.4%)             |
| Clostridial infection                                               | 0                      | 2 ( 0.1%)              | 2 (<0.1%)              |
| Coccidioidomycosis                                                  | 2 ( 0.1%)              | 0                      | 2 (<0.1%)              |
| Conjunctivitis infective                                            | 0                      | 1 (<0.1%)              | 1 (<0.1%)              |
| Cystitis                                                            | 12 ( 0.8%)             | 10 ( 0.7%)             | 22 ( 0.8%)             |
| Cytomegalovirus infection                                           | 0                      | 1 (<0.1%)              | 1 (<0.1%)              |
| Diverticulitis                                                      | 1 (<0.1%)              | 0                      | 1 (<0.1%)              |
| Ear infection                                                       | 7 ( 0.5%)              | 10 ( 0.7%)             | 17 ( 0.6%)             |
| Eczema infected                                                     | 1 (<0.1%)              | 0                      | 1 (<0.1%)              |
| Encephalitic infection                                              | 0                      | 1 (<0.1%)              | 1 (<0.1%)              |
| Endometritis decidual                                               | 1 (<0.1%)              | 0                      | 1 (<0.1%)              |
| Enterocolitis bacterial                                             | 0                      | 1 (<0.1%)              | 1 (<0.1%)              |
| Enterocolitis infectious                                            | 1 (<0.1%)              | 1 (<0.1%)              | 2 (<0.1%)              |
| Epstein-Barr virus infection                                        | 0                      | 1 (<0.1%)              | 1 (<0.1%)              |
| Folliculitis                                                        | 2 ( 0.1%)              | 2 ( 0.1%)              | 4 ( 0.1%)              |
| Fungal infection                                                    | 31 ( 2.2%)             | 40 ( 2.8%)             | 71 ( 2.5%)             |
| Fungal skin infection                                               | 1 (<0.1%)              | 1 (<0.1%)              | 2 (<0.1%)              |
| Gardnerella infection                                               | 0                      | 1 (<0.1%)              | 1 (<0.1%)              |
| Gastroenteritis                                                     | 3 ( 0.2%)              | 3 ( 0.2%)              | 6 ( 0.2%)              |
| Gastroenteritis salmonella                                          | 1 (<0.1%)              | 0                      | 1 (<0.1%)              |
| Gastroenteritis viral                                               | 0                      | 1 (<0.1%)              | 1 (<0.1%)              |
| Genital candidiasis                                                 | 0                      | 2 ( 0.1%)              | 2 (<0.1%)              |
| Genital herpes                                                      | 16 ( 1.1%)             | 20 ( 1.4%)             | 36 ( 1.2%)             |
| Genital infection bacterial                                         | 1 (<0.1%)              | 0                      | 1 (<0.1%)              |
| Genital infection fungal                                            | 1 (<0.1%)              | 1 (<0.1%)              | 2 (<0.1%)              |
| Genital infection viral                                             | 2 ( 0.1%)              | 1 (<0.1%)              | 3 ( 0.1%)              |

**Table 14.3.1 / 4: Number of subjects with baseline findings or medical history by MedDRA SOC/PT (FAS)**

| Primary system organ class<br>Preferred term<br>MedDRA version 14.0 | LCS12<br>N=1432 (100%) | LCS16<br>N=1452 (100%) | Total<br>N=2884 (100%) |
|---------------------------------------------------------------------|------------------------|------------------------|------------------------|
| Genitourinary chlamydia infection                                   | 5 ( 0.3%)              | 4 ( 0.3%)              | 9 ( 0.3%)              |
| Giardiasis                                                          | 0                      | 1 (<0.1%)              | 1 (<0.1%)              |
| Gonorrhoea                                                          | 7 ( 0.5%)              | 5 ( 0.3%)              | 12 ( 0.4%)             |
| Gynaecological chlamydia infection                                  | 8 ( 0.6%)              | 6 ( 0.4%)              | 14 ( 0.5%)             |
| Hand-foot-and-mouth disease                                         | 1 (<0.1%)              | 0                      | 1 (<0.1%)              |
| Helicobacter gastritis                                              | 1 (<0.1%)              | 0                      | 1 (<0.1%)              |
| Helicobacter infection                                              | 1 (<0.1%)              | 0                      | 1 (<0.1%)              |
| Hepatitis A                                                         | 2 ( 0.1%)              | 8 ( 0.6%)              | 10 ( 0.3%)             |
| Hepatitis B                                                         | 1 (<0.1%)              | 0                      | 1 (<0.1%)              |
| Herpes dermatitis                                                   | 1 (<0.1%)              | 0                      | 1 (<0.1%)              |
| Herpes ophthalmic                                                   | 1 (<0.1%)              | 0                      | 1 (<0.1%)              |
| Herpes simplex                                                      | 7 ( 0.5%)              | 6 ( 0.4%)              | 13 ( 0.5%)             |
| Herpes virus infection                                              | 0                      | 1 (<0.1%)              | 1 (<0.1%)              |
| Herpes zoster                                                       | 0                      | 2 ( 0.1%)              | 2 (<0.1%)              |
| Hordeolum                                                           | 0                      | 2 ( 0.1%)              | 2 (<0.1%)              |
| Infection                                                           | 0                      | 1 (<0.1%)              | 1 (<0.1%)              |
| Infectious mononucleosis                                            | 7 ( 0.5%)              | 4 ( 0.3%)              | 11 ( 0.4%)             |
| Influenza                                                           | 15 ( 1.0%)             | 15 ( 1.0%)             | 30 ( 1.0%)             |
| Kidney infection                                                    | 7 ( 0.5%)              | 11 ( 0.8%)             | 18 ( 0.6%)             |
| Labyrinthitis                                                       | 1 (<0.1%)              | 0                      | 1 (<0.1%)              |
| Lactobacillus infection                                             | 1 (<0.1%)              | 0                      | 1 (<0.1%)              |
| Laryngitis                                                          | 3 ( 0.2%)              | 2 ( 0.1%)              | 5 ( 0.2%)              |
| Localised infection                                                 | 1 (<0.1%)              | 2 ( 0.1%)              | 3 ( 0.1%)              |
| Lower respiratory tract infection                                   | 0                      | 1 (<0.1%)              | 1 (<0.1%)              |
| Lyme disease                                                        | 2 ( 0.1%)              | 0                      | 2 (<0.1%)              |
| Lymph node tuberculosis                                             | 0                      | 1 (<0.1%)              | 1 (<0.1%)              |
| Mastitis                                                            | 2 ( 0.1%)              | 0                      | 2 (<0.1%)              |
| Mastitis postpartum                                                 | 0                      | 1 (<0.1%)              | 1 (<0.1%)              |
| Mastoiditis                                                         | 1 (<0.1%)              | 0                      | 1 (<0.1%)              |
| Meningitis                                                          | 1 (<0.1%)              | 1 (<0.1%)              | 2 (<0.1%)              |
| Meningitis viral                                                    | 1 (<0.1%)              | 2 ( 0.1%)              | 3 ( 0.1%)              |
| Molluscum contagiosum                                               | 1 (<0.1%)              | 1 (<0.1%)              | 2 (<0.1%)              |
| Nasopharyngitis                                                     | 27 ( 1.9%)             | 28 ( 1.9%)             | 55 ( 1.9%)             |
| Onychomycosis                                                       | 2 ( 0.1%)              | 3 ( 0.2%)              | 5 ( 0.2%)              |
| Oral herpes                                                         | 8 ( 0.6%)              | 12 ( 0.8%)             | 20 ( 0.7%)             |
| Osteomyelitis                                                       | 2 ( 0.1%)              | 1 (<0.1%)              | 3 ( 0.1%)              |
| Otitis externa                                                      | 3 ( 0.2%)              | 0                      | 3 ( 0.1%)              |
| Otitis media                                                        | 4 ( 0.3%)              | 3 ( 0.2%)              | 7 ( 0.2%)              |
| Otitis media bacterial                                              | 1 (<0.1%)              | 0                      | 1 (<0.1%)              |
| Papilloma viral infection                                           | 2 ( 0.1%)              | 2 ( 0.1%)              | 4 ( 0.1%)              |
| Paratyphoid fever                                                   | 0                      | 1 (<0.1%)              | 1 (<0.1%)              |
| Paronychia                                                          | 0                      | 1 (<0.1%)              | 1 (<0.1%)              |
| Pelvic infection                                                    | 1 (<0.1%)              | 1 (<0.1%)              | 2 (<0.1%)              |
| Pelvic inflammatory disease                                         | 2 ( 0.1%)              | 1 (<0.1%)              | 3 ( 0.1%)              |

**Table 14.3.1 / 4: Number of subjects with baseline findings or medical history by MedDRA SOC/PT (FAS)**

| Primary system organ class<br>Preferred term<br>MedDRA version 14.0 | LCS12<br>N=1432 (100%) | LCS16<br>N=1452 (100%) | Total<br>N=2884 (100%) |
|---------------------------------------------------------------------|------------------------|------------------------|------------------------|
| Periodontal infection                                               | 1 ( <0.1%)             | 0                      | 1 ( <0.1%)             |
| Peritonsillar abscess                                               | 0                      | 1 ( <0.1%)             | 1 ( <0.1%)             |
| Peritonsillitis                                                     | 0                      | 1 ( <0.1%)             | 1 ( <0.1%)             |
| Pharyngitis                                                         | 7 ( 0.5%)              | 4 ( 0.3%)              | 11 ( 0.4%)             |
| Pharyngitis streptococcal                                           | 4 ( 0.3%)              | 9 ( 0.6%)              | 13 ( 0.5%)             |
| Pilonidal cyst                                                      | 1 ( <0.1%)             | 1 ( <0.1%)             | 2 ( <0.1%)             |
| Pneumonia                                                           | 11 ( 0.8%)             | 14 ( 1.0%)             | 25 ( 0.9%)             |
| Pneumonia mycoplasmal                                               | 0                      | 1 ( <0.1%)             | 1 ( <0.1%)             |
| Postoperative wound infection                                       | 1 ( <0.1%)             | 0                      | 1 ( <0.1%)             |
| Pseudofolliculitis barbae                                           | 0                      | 1 ( <0.1%)             | 1 ( <0.1%)             |
| Pyelonephritis                                                      | 4 ( 0.3%)              | 0                      | 4 ( 0.1%)              |
| Pyelonephritis acute                                                | 0                      | 1 ( <0.1%)             | 1 ( <0.1%)             |
| Respiratory tract infection                                         | 5 ( 0.3%)              | 2 ( 0.1%)              | 7 ( 0.2%)              |
| Rhinitis                                                            | 3 ( 0.2%)              | 1 ( <0.1%)             | 4 ( 0.1%)              |
| Rubella                                                             | 1 ( <0.1%)             | 0                      | 1 ( <0.1%)             |
| Salpingitis                                                         | 0                      | 1 ( <0.1%)             | 1 ( <0.1%)             |
| Scarlet fever                                                       | 0                      | 3 ( 0.2%)              | 3 ( 0.1%)              |
| Sinobronchitis                                                      | 0                      | 1 ( <0.1%)             | 1 ( <0.1%)             |
| Sinusitis                                                           | 37 ( 2.6%)             | 33 ( 2.3%)             | 70 ( 2.4%)             |
| Skin infection                                                      | 3 ( 0.2%)              | 2 ( 0.1%)              | 5 ( 0.2%)              |
| Staphylococcal infection                                            | 0                      | 2 ( 0.1%)              | 2 ( <0.1%)             |
| Staphylococcal skin infection                                       | 1 ( <0.1%)             | 0                      | 1 ( <0.1%)             |
| Syphilis                                                            | 0                      | 1 ( <0.1%)             | 1 ( <0.1%)             |
| Tinea infection                                                     | 1 ( <0.1%)             | 1 ( <0.1%)             | 2 ( <0.1%)             |
| Tinea pedis                                                         | 3 ( 0.2%)              | 0                      | 3 ( 0.1%)              |
| Tinea versicolour                                                   | 1 ( <0.1%)             | 1 ( <0.1%)             | 2 ( <0.1%)             |
| Tonsillitis                                                         | 26 ( 1.8%)             | 20 ( 1.4%)             | 46 ( 1.6%)             |
| Tooth abscess                                                       | 1 ( <0.1%)             | 2 ( 0.1%)              | 3 ( 0.1%)              |
| Tooth infection                                                     | 4 ( 0.3%)              | 4 ( 0.3%)              | 8 ( 0.3%)              |
| Trichomoniasis                                                      | 0                      | 2 ( 0.1%)              | 2 ( <0.1%)             |
| Tuberculosis                                                        | 0                      | 3 ( 0.2%)              | 3 ( 0.1%)              |
| Typhoid fever                                                       | 1 ( <0.1%)             | 0                      | 1 ( <0.1%)             |
| Upper respiratory tract infection                                   | 12 ( 0.8%)             | 17 ( 1.2%)             | 29 ( 1.0%)             |
| Urethritis                                                          | 1 ( <0.1%)             | 0                      | 1 ( <0.1%)             |
| Urinary tract infection                                             | 77 ( 5.4%)             | 70 ( 4.8%)             | 147 ( 5.1%)            |
| Uterine infection                                                   | 1 ( <0.1%)             | 0                      | 1 ( <0.1%)             |
| Vaginal infection                                                   | 17 ( 1.2%)             | 18 ( 1.2%)             | 35 ( 1.2%)             |
| Vaginitis bacterial                                                 | 59 ( 4.1%)             | 43 ( 3.0%)             | 102 ( 3.5%)            |
| Vaginitis chlamydial                                                | 15 ( 1.0%)             | 13 ( 0.9%)             | 28 ( 1.0%)             |
| Vaginitis gardnerella                                               | 0                      | 1 ( <0.1%)             | 1 ( <0.1%)             |
| Varicella                                                           | 4 ( 0.3%)              | 2 ( 0.1%)              | 6 ( 0.2%)              |
| Viral upper respiratory tract infection                             | 1 ( <0.1%)             | 3 ( 0.2%)              | 4 ( 0.1%)              |
| Vulval abscess                                                      | 0                      | 1 ( <0.1%)             | 1 ( <0.1%)             |
| Vulvitis                                                            | 4 ( 0.3%)              | 0                      | 4 ( 0.1%)              |

**Table 14.3.1 / 4: Number of subjects with baseline findings or medical history by MedDRA SOC/PT (FAS)**

| Primary system organ class<br>Preferred term<br>MedDRA version 14.0 | LCS12<br>N=1432 (100%) | LCS16<br>N=1452 (100%) | Total<br>N=2884 (100%) |
|---------------------------------------------------------------------|------------------------|------------------------|------------------------|
| Vulvovaginal candidiasis                                            | 27 ( 1.9%)             | 20 ( 1.4%)             | 47 ( 1.6%)             |
| Vulvovaginal mycotic infection                                      | 21 ( 1.5%)             | 21 ( 1.4%)             | 42 ( 1.5%)             |
| Vulvovaginitis                                                      | 2 ( 0.1%)              | 0                      | 2 ( <0.1%)             |
| Vulvovaginitis streptococcal                                        | 0                      | 3 ( 0.2%)              | 3 ( 0.1%)              |
| Vulvovaginitis trichomonal                                          | 3 ( 0.2%)              | 3 ( 0.2%)              | 6 ( 0.2%)              |

**Table 14.3.1 / 4: Number of subjects with baseline findings or medical history by MedDRA SOC/PT (FAS)**

| Primary system organ class<br>Preferred term<br>MedDRA version 14.0 | LCS12<br>N=1432 (100%) | LCS16<br>N=1452 (100%) | Total<br>N=2884 (100%) |
|---------------------------------------------------------------------|------------------------|------------------------|------------------------|
| Injury, poisoning and procedural complications                      | 76 ( 5.3%)             | 106 ( 7.3%)            | 182 ( 6.3%)            |
| Animal bite                                                         | 1 (<0.1%)              | 0                      | 1 (<0.1%)              |
| Ankle fracture                                                      | 2 ( 0.1%)              | 9 ( 0.6%)              | 11 ( 0.4%)             |
| Arthropod bite                                                      | 2 ( 0.1%)              | 0                      | 2 (<0.1%)              |
| Avulsion fracture                                                   | 0                      | 1 (<0.1%)              | 1 (<0.1%)              |
| Brain contusion                                                     | 0                      | 1 (<0.1%)              | 1 (<0.1%)              |
| Cartilage injury                                                    | 0                      | 2 ( 0.1%)              | 2 (<0.1%)              |
| Cervical vertebral fracture                                         | 1 (<0.1%)              | 1 (<0.1%)              | 2 (<0.1%)              |
| Clavicle fracture                                                   | 2 ( 0.1%)              | 3 ( 0.2%)              | 5 ( 0.2%)              |
| Collapse of lung                                                    | 1 (<0.1%)              | 0                      | 1 (<0.1%)              |
| Concussion                                                          | 4 ( 0.3%)              | 3 ( 0.2%)              | 7 ( 0.2%)              |
| Contusion                                                           | 2 ( 0.1%)              | 1 (<0.1%)              | 3 ( 0.1%)              |
| Dislocation of vertebra                                             | 0                      | 1 (<0.1%)              | 1 (<0.1%)              |
| Epicondylitis                                                       | 0                      | 1 (<0.1%)              | 1 (<0.1%)              |
| Face injury                                                         | 1 (<0.1%)              | 0                      | 1 (<0.1%)              |
| Facial bones fracture                                               | 3 ( 0.2%)              | 4 ( 0.3%)              | 7 ( 0.2%)              |
| Fibula fracture                                                     | 0                      | 1 (<0.1%)              | 1 (<0.1%)              |
| Foot fracture                                                       | 6 ( 0.4%)              | 6 ( 0.4%)              | 12 ( 0.4%)             |
| Forearm fracture                                                    | 1 (<0.1%)              | 1 (<0.1%)              | 2 (<0.1%)              |
| Foreign body                                                        | 0                      | 1 (<0.1%)              | 1 (<0.1%)              |
| Fractured coccyx                                                    | 1 (<0.1%)              | 0                      | 1 (<0.1%)              |
| Hand fracture                                                       | 3 ( 0.2%)              | 4 ( 0.3%)              | 7 ( 0.2%)              |
| Head injury                                                         | 1 (<0.1%)              | 4 ( 0.3%)              | 5 ( 0.2%)              |
| Hip fracture                                                        | 0                      | 2 ( 0.1%)              | 2 (<0.1%)              |
| Humerus fracture                                                    | 1 (<0.1%)              | 2 ( 0.1%)              | 3 ( 0.1%)              |
| Incision site pain                                                  | 0                      | 1 (<0.1%)              | 1 (<0.1%)              |
| Injury                                                              | 0                      | 2 ( 0.1%)              | 2 (<0.1%)              |
| Jaw fracture                                                        | 1 (<0.1%)              | 0                      | 1 (<0.1%)              |
| Joint dislocation                                                   | 2 ( 0.1%)              | 5 ( 0.3%)              | 7 ( 0.2%)              |
| Joint injury                                                        | 5 ( 0.3%)              | 2 ( 0.1%)              | 7 ( 0.2%)              |
| Joint sprain                                                        | 4 ( 0.3%)              | 6 ( 0.4%)              | 10 ( 0.3%)             |
| Ligament rupture                                                    | 1 (<0.1%)              | 7 ( 0.5%)              | 8 ( 0.3%)              |
| Limb injury                                                         | 5 ( 0.3%)              | 1 (<0.1%)              | 6 ( 0.2%)              |
| Lower limb fracture                                                 | 3 ( 0.2%)              | 4 ( 0.3%)              | 7 ( 0.2%)              |
| Lumbar vertebral fracture                                           | 1 (<0.1%)              | 0                      | 1 (<0.1%)              |
| Meniscus lesion                                                     | 2 ( 0.1%)              | 5 ( 0.3%)              | 7 ( 0.2%)              |
| Muscle injury                                                       | 0                      | 2 ( 0.1%)              | 2 (<0.1%)              |
| Muscle strain                                                       | 0                      | 2 ( 0.1%)              | 2 (<0.1%)              |
| Neck injury                                                         | 1 (<0.1%)              | 1 (<0.1%)              | 2 (<0.1%)              |
| Pelvic fracture                                                     | 0                      | 1 (<0.1%)              | 1 (<0.1%)              |
| Post procedural complication                                        | 1 (<0.1%)              | 0                      | 1 (<0.1%)              |
| Post-traumatic pain                                                 | 0                      | 2 ( 0.1%)              | 2 (<0.1%)              |
| Procedural pain                                                     | 3 ( 0.2%)              | 1 (<0.1%)              | 4 ( 0.1%)              |
| Procedural site reaction                                            | 0                      | 1 (<0.1%)              | 1 (<0.1%)              |

**Table 14.3.1 / 4: Number of subjects with baseline findings or medical history by MedDRA SOC/PT (FAS)**

| Primary system organ class<br>Preferred term<br>MedDRA version 14.0 | LCS12<br>N=1432 (100%) | LCS16<br>N=1452 (100%) | Total<br>N=2884 (100%) |
|---------------------------------------------------------------------|------------------------|------------------------|------------------------|
| Radius fracture                                                     | 1 ( <0.1%)             | 0                      | 1 ( <0.1%)             |
| Rib fracture                                                        | 2 ( 0.1%)              | 2 ( 0.1%)              | 4 ( 0.1%)              |
| Road traffic accident                                               | 1 ( <0.1%)             | 2 ( 0.1%)              | 3 ( 0.1%)              |
| Sciatic nerve injury                                                | 1 ( <0.1%)             | 0                      | 1 ( <0.1%)             |
| Spinal column injury                                                | 0                      | 1 ( <0.1%)             | 1 ( <0.1%)             |
| Spinal fracture                                                     | 0                      | 1 ( <0.1%)             | 1 ( <0.1%)             |
| Splenic rupture                                                     | 1 ( <0.1%)             | 0                      | 1 ( <0.1%)             |
| Synovial rupture                                                    | 0                      | 1 ( <0.1%)             | 1 ( <0.1%)             |
| Tendon injury                                                       | 0                      | 1 ( <0.1%)             | 1 ( <0.1%)             |
| Tendon rupture                                                      | 1 ( <0.1%)             | 1 ( <0.1%)             | 2 ( <0.1%)             |
| Thermal burn                                                        | 1 ( <0.1%)             | 2 ( 0.1%)              | 3 ( 0.1%)              |
| Tibia fracture                                                      | 0                      | 1 ( <0.1%)             | 1 ( <0.1%)             |
| Tooth fracture                                                      | 1 ( <0.1%)             | 0                      | 1 ( <0.1%)             |
| Tooth injury                                                        | 0                      | 1 ( <0.1%)             | 1 ( <0.1%)             |
| Traumatic brain injury                                              | 1 ( <0.1%)             | 0                      | 1 ( <0.1%)             |
| Traumatic haematoma                                                 | 1 ( <0.1%)             | 0                      | 1 ( <0.1%)             |
| Ulna fracture                                                       | 2 ( 0.1%)              | 0                      | 2 ( <0.1%)             |
| Upper limb fracture                                                 | 8 ( 0.6%)              | 14 ( 1.0%)             | 22 ( 0.8%)             |
| Uterine perforation                                                 | 1 ( <0.1%)             | 0                      | 1 ( <0.1%)             |
| Uterine rupture                                                     | 1 ( <0.1%)             | 0                      | 1 ( <0.1%)             |
| Whiplash injury                                                     | 0                      | 4 ( 0.3%)              | 4 ( 0.1%)              |
| Wound                                                               | 2 ( 0.1%)              | 0                      | 2 ( <0.1%)             |
| Wrist fracture                                                      | 6 ( 0.4%)              | 8 ( 0.6%)              | 14 ( 0.5%)             |



**Table 14.3.1 / 4: Number of subjects with baseline findings or medical history by MedDRA SOC/PT (FAS)**

| Primary system organ class<br>Preferred term<br>MedDRA version 14.0 | LCS12<br>N=1432 (100%) | LCS16<br>N=1452 (100%) | Total<br>N=2884 (100%) |
|---------------------------------------------------------------------|------------------------|------------------------|------------------------|
| Investigations                                                      | 210 ( 14.7%)           | 222 ( 15.3%)           | 432 ( 15.0%)           |
| Alanine aminotransferase increased                                  | 10 ( 0.7%)             | 8 ( 0.6%)              | 18 ( 0.6%)             |
| Arthroscopy                                                         | 10 ( 0.7%)             | 12 ( 0.8%)             | 22 ( 0.8%)             |
| Aspartate aminotransferase increased                                | 2 ( 0.1%)              | 2 ( 0.1%)              | 4 ( 0.1%)              |
| Aspiration breast                                                   | 0                      | 1 (<0.1%)              | 1 (<0.1%)              |
| Biopsy                                                              | 1 (<0.1%)              | 0                      | 1 (<0.1%)              |
| Biopsy breast                                                       | 3 ( 0.2%)              | 4 ( 0.3%)              | 7 ( 0.2%)              |
| Biopsy breast normal                                                | 1 (<0.1%)              | 0                      | 1 (<0.1%)              |
| Biopsy cervix                                                       | 8 ( 0.6%)              | 7 ( 0.5%)              | 15 ( 0.5%)             |
| Biopsy kidney                                                       | 1 (<0.1%)              | 0                      | 1 (<0.1%)              |
| Biopsy site unspecified normal                                      | 0                      | 1 (<0.1%)              | 1 (<0.1%)              |
| Biopsy thyroid gland                                                | 0                      | 1 (<0.1%)              | 1 (<0.1%)              |
| Blood albumin decreased                                             | 1 (<0.1%)              | 0                      | 1 (<0.1%)              |
| Blood albumin increased                                             | 1 (<0.1%)              | 0                      | 1 (<0.1%)              |
| Blood alkaline phosphatase increased                                | 1 (<0.1%)              | 0                      | 1 (<0.1%)              |
| Blood cholesterol decreased                                         | 1 (<0.1%)              | 0                      | 1 (<0.1%)              |
| Blood cholesterol increased                                         | 6 ( 0.4%)              | 4 ( 0.3%)              | 10 ( 0.3%)             |
| Blood creatinine decreased                                          | 2 ( 0.1%)              | 6 ( 0.4%)              | 8 ( 0.3%)              |
| Blood iron decreased                                                | 1 (<0.1%)              | 2 ( 0.1%)              | 3 ( 0.1%)              |
| Blood potassium decreased                                           | 1 (<0.1%)              | 0                      | 1 (<0.1%)              |
| Blood potassium increased                                           | 5 ( 0.3%)              | 5 ( 0.3%)              | 10 ( 0.3%)             |
| Blood pressure increased                                            | 1 (<0.1%)              | 0                      | 1 (<0.1%)              |
| Blood pressure systolic increased                                   | 0                      | 1 (<0.1%)              | 1 (<0.1%)              |
| Blood sodium decreased                                              | 0                      | 1 (<0.1%)              | 1 (<0.1%)              |
| Blood sodium increased                                              | 4 ( 0.3%)              | 2 ( 0.1%)              | 6 ( 0.2%)              |
| Blood testosterone increased                                        | 1 (<0.1%)              | 0                      | 1 (<0.1%)              |
| Blood triglycerides increased                                       | 6 ( 0.4%)              | 10 ( 0.7%)             | 16 ( 0.6%)             |
| Blood urine present                                                 | 1 (<0.1%)              | 2 ( 0.1%)              | 3 ( 0.1%)              |
| Cardiac murmur                                                      | 8 ( 0.6%)              | 2 ( 0.1%)              | 10 ( 0.3%)             |
| Chlamydia test                                                      | 1 (<0.1%)              | 0                      | 1 (<0.1%)              |
| Chlamydia test positive                                             | 12 ( 0.8%)             | 14 ( 1.0%)             | 26 ( 0.9%)             |
| Colonoscopy                                                         | 1 (<0.1%)              | 5 ( 0.3%)              | 6 ( 0.2%)              |
| Colposcopy                                                          | 28 ( 2.0%)             | 24 ( 1.7%)             | 52 ( 1.8%)             |
| Colposcopy normal                                                   | 0                      | 1 (<0.1%)              | 1 (<0.1%)              |
| Cystoscopy                                                          | 0                      | 1 (<0.1%)              | 1 (<0.1%)              |
| Endoscopic retrograde cholangiopancreatography                      | 0                      | 1 (<0.1%)              | 1 (<0.1%)              |
| Endoscopy                                                           | 2 ( 0.1%)              | 1 (<0.1%)              | 3 ( 0.1%)              |
| Endoscopy upper gastrointestinal tract                              | 1 (<0.1%)              | 1 (<0.1%)              | 2 (<0.1%)              |
| Fungal test positive                                                | 0                      | 1 (<0.1%)              | 1 (<0.1%)              |
| Gamma-glutamyltransferase increased                                 | 6 ( 0.4%)              | 6 ( 0.4%)              | 12 ( 0.4%)             |
| Glycosylated haemoglobin increased                                  | 0                      | 2 ( 0.1%)              | 2 (<0.1%)              |
| Haematocrit decreased                                               | 2 ( 0.1%)              | 4 ( 0.3%)              | 6 ( 0.2%)              |
| Haematocrit increased                                               | 1 (<0.1%)              | 0                      | 1 (<0.1%)              |
| Haematology test abnormal                                           | 0                      | 1 (<0.1%)              | 1 (<0.1%)              |

**Table 14.3.1 / 4: Number of subjects with baseline findings or medical history by MedDRA SOC/PT (FAS)**

| Primary system organ class<br>Preferred term<br>MedDRA version 14.0 | LCS12<br>N=1432 (100%) | LCS16<br>N=1452 (100%) | Total<br>N=2884 (100%) |
|---------------------------------------------------------------------|------------------------|------------------------|------------------------|
| Haemoglobin decreased                                               | 6 ( 0.4%)              | 8 ( 0.6%)              | 14 ( 0.5%)             |
| Haemoglobin increased                                               | 0                      | 1 (<0.1%)              | 1 (<0.1%)              |
| Haemoglobin urine present                                           | 0                      | 2 ( 0.1%)              | 2 (<0.1%)              |
| Heart rate increased                                                | 0                      | 2 ( 0.1%)              | 2 (<0.1%)              |
| Heart rate irregular                                                | 1 (<0.1%)              | 0                      | 1 (<0.1%)              |
| Heart sounds abnormal                                               | 1 (<0.1%)              | 0                      | 1 (<0.1%)              |
| Hepatic enzyme increased                                            | 2 ( 0.1%)              | 1 (<0.1%)              | 3 ( 0.1%)              |
| High density lipoprotein abnormal                                   | 2 ( 0.1%)              | 0                      | 2 (<0.1%)              |
| High density lipoprotein decreased                                  | 3 ( 0.2%)              | 3 ( 0.2%)              | 6 ( 0.2%)              |
| Human papilloma virus test negative                                 | 0                      | 1 (<0.1%)              | 1 (<0.1%)              |
| Human papilloma virus test positive                                 | 28 ( 2.0%)             | 31 ( 2.1%)             | 59 ( 2.0%)             |
| Hysteroscopy                                                        | 1 (<0.1%)              | 3 ( 0.2%)              | 4 ( 0.1%)              |
| Laparoscopy                                                         | 16 ( 1.1%)             | 12 ( 0.8%)             | 28 ( 1.0%)             |
| Leukocyte antigen B-27 positive                                     | 0                      | 1 (<0.1%)              | 1 (<0.1%)              |
| Lipids increased                                                    | 1 (<0.1%)              | 0                      | 1 (<0.1%)              |
| Liver function test abnormal                                        | 1 (<0.1%)              | 0                      | 1 (<0.1%)              |
| Low density lipoprotein decreased                                   | 0                      | 1 (<0.1%)              | 1 (<0.1%)              |
| Low density lipoprotein increased                                   | 7 ( 0.5%)              | 5 ( 0.3%)              | 12 ( 0.4%)             |
| Mammogram abnormal                                                  | 0                      | 1 (<0.1%)              | 1 (<0.1%)              |
| Oesophagogastroscopy                                                | 0                      | 1 (<0.1%)              | 1 (<0.1%)              |
| Paracentesis                                                        | 0                      | 1 (<0.1%)              | 1 (<0.1%)              |
| Platelet count decreased                                            | 0                      | 2 ( 0.1%)              | 2 (<0.1%)              |
| Platelet count increased                                            | 0                      | 1 (<0.1%)              | 1 (<0.1%)              |
| Pregnancy test positive                                             | 1 (<0.1%)              | 0                      | 1 (<0.1%)              |
| Protein total decreased                                             | 2 ( 0.1%)              | 1 (<0.1%)              | 3 ( 0.1%)              |
| Protein total increased                                             | 1 (<0.1%)              | 2 ( 0.1%)              | 3 ( 0.1%)              |
| Red blood cell count decreased                                      | 0                      | 1 (<0.1%)              | 1 (<0.1%)              |
| Red blood cell count increased                                      | 1 (<0.1%)              | 1 (<0.1%)              | 2 (<0.1%)              |
| Rhesus antibodies negative                                          | 0                      | 1 (<0.1%)              | 1 (<0.1%)              |
| Smear cervix abnormal                                               | 64 ( 4.5%)             | 49 ( 3.4%)             | 113 ( 3.9%)            |
| Smear cervix normal                                                 | 0                      | 2 ( 0.1%)              | 2 (<0.1%)              |
| Streptococcus test positive                                         | 0                      | 1 (<0.1%)              | 1 (<0.1%)              |
| Ultrasound uterus abnormal                                          | 1 (<0.1%)              | 0                      | 1 (<0.1%)              |
| Urine leukocyte esterase positive                                   | 2 ( 0.1%)              | 1 (<0.1%)              | 3 ( 0.1%)              |
| Vitamin B12 decreased                                               | 0                      | 1 (<0.1%)              | 1 (<0.1%)              |
| Weight decreased                                                    | 2 ( 0.1%)              | 1 (<0.1%)              | 3 ( 0.1%)              |
| Weight increased                                                    | 0                      | 3 ( 0.2%)              | 3 ( 0.1%)              |
| White blood cell count decreased                                    | 3 ( 0.2%)              | 7 ( 0.5%)              | 10 ( 0.3%)             |
| White blood cell count increased                                    | 6 ( 0.4%)              | 9 ( 0.6%)              | 15 ( 0.5%)             |

**Table 14.3.1 / 4: Number of subjects with baseline findings or medical history by MedDRA SOC/PT (FAS)**

| Primary system organ class         | LCS12         | LCS16         | Total         |
|------------------------------------|---------------|---------------|---------------|
| Preferred term                     | N=1432 (100%) | N=1452 (100%) | N=2884 (100%) |
| MedDRA version 14.0                |               |               |               |
| Metabolism and nutrition disorders | 48 ( 3.4%)    | 54 ( 3.7%)    | 102 ( 3.5%)   |
| Body fat disorder                  | 0             | 1 (<0.1%)     | 1 (<0.1%)     |
| Decreased appetite                 | 1 (<0.1%)     | 1 (<0.1%)     | 2 (<0.1%)     |
| Diabetes mellitus                  | 0             | 1 (<0.1%)     | 1 (<0.1%)     |
| Dyslipidaemia                      | 1 (<0.1%)     | 0             | 1 (<0.1%)     |
| Fluid retention                    | 1 (<0.1%)     | 4 ( 0.3%)     | 5 ( 0.2%)     |
| Food intolerance                   | 1 (<0.1%)     | 0             | 1 (<0.1%)     |
| Gestational diabetes               | 4 ( 0.3%)     | 10 ( 0.7%)    | 14 ( 0.5%)    |
| Glucose tolerance impaired         | 1 (<0.1%)     | 0             | 1 (<0.1%)     |
| Hypercholesterolaemia              | 7 ( 0.5%)     | 7 ( 0.5%)     | 14 ( 0.5%)    |
| Hyperlipidaemia                    | 3 ( 0.2%)     | 2 ( 0.1%)     | 5 ( 0.2%)     |
| Hypertriglyceridaemia              | 1 (<0.1%)     | 0             | 1 (<0.1%)     |
| Hypocholesterolaemia               | 1 (<0.1%)     | 0             | 1 (<0.1%)     |
| Hypoglycaemia                      | 2 ( 0.1%)     | 3 ( 0.2%)     | 5 ( 0.2%)     |
| Hypoglycaemic seizure              | 1 (<0.1%)     | 0             | 1 (<0.1%)     |
| Hypokalaemia                       | 0             | 1 (<0.1%)     | 1 (<0.1%)     |
| Insulin resistance                 | 4 ( 0.3%)     | 6 ( 0.4%)     | 10 ( 0.3%)    |
| Iron deficiency                    | 0             | 2 ( 0.1%)     | 2 (<0.1%)     |
| Lactose intolerance                | 11 ( 0.8%)    | 10 ( 0.7%)    | 21 ( 0.7%)    |
| Obesity                            | 7 ( 0.5%)     | 8 ( 0.6%)     | 15 ( 0.5%)    |
| Overweight                         | 2 ( 0.1%)     | 0             | 2 (<0.1%)     |
| Type 1 diabetes mellitus           | 3 ( 0.2%)     | 1 (<0.1%)     | 4 ( 0.1%)     |

**Table 14.3.1 / 4: Number of subjects with baseline findings or medical history by MedDRA SOC/PT (FAS)**

| Primary system organ class                      | LCS12         | LCS16         | Total         |
|-------------------------------------------------|---------------|---------------|---------------|
| Preferred term                                  | N=1432 (100%) | N=1452 (100%) | N=2884 (100%) |
| MedDRA version 14.0                             |               |               |               |
| Musculoskeletal and connective tissue disorders | 141 ( 9.8%)   | 142 ( 9.8%)   | 283 ( 9.8%)   |
| Ankylosing spondylitis                          | 1 (<0.1%)     | 0             | 1 (<0.1%)     |
| Arthralgia                                      | 21 ( 1.5%)    | 21 ( 1.4%)    | 42 ( 1.5%)    |
| Arthritis                                       | 3 ( 0.2%)     | 4 ( 0.3%)     | 7 ( 0.2%)     |
| Arthritis reactive                              | 1 (<0.1%)     | 0             | 1 (<0.1%)     |
| Arthropathy                                     | 1 (<0.1%)     | 0             | 1 (<0.1%)     |
| Back disorder                                   | 1 (<0.1%)     | 0             | 1 (<0.1%)     |
| Back pain                                       | 42 ( 2.9%)    | 50 ( 3.4%)    | 92 ( 3.2%)    |
| Bone pain                                       | 0             | 1 (<0.1%)     | 1 (<0.1%)     |
| Bunion                                          | 2 ( 0.1%)     | 0             | 2 (<0.1%)     |
| Bursitis                                        | 1 (<0.1%)     | 2 ( 0.1%)     | 3 ( 0.1%)     |
| Cartilage hypertrophy                           | 1 (<0.1%)     | 0             | 1 (<0.1%)     |
| Chondromalacia                                  | 0             | 1 (<0.1%)     | 1 (<0.1%)     |
| Costochondritis                                 | 0             | 1 (<0.1%)     | 1 (<0.1%)     |
| Fibromyalgia                                    | 2 ( 0.1%)     | 3 ( 0.2%)     | 5 ( 0.2%)     |
| Foot deformity                                  | 1 (<0.1%)     | 3 ( 0.2%)     | 4 ( 0.1%)     |
| Intervertebral disc degeneration                | 2 ( 0.1%)     | 0             | 2 (<0.1%)     |
| Intervertebral disc displacement                | 0             | 1 (<0.1%)     | 1 (<0.1%)     |
| Intervertebral disc protrusion                  | 6 ( 0.4%)     | 6 ( 0.4%)     | 12 ( 0.4%)    |
| Joint instability                               | 1 (<0.1%)     | 0             | 1 (<0.1%)     |
| Juvenile arthritis                              | 3 ( 0.2%)     | 1 (<0.1%)     | 4 ( 0.1%)     |
| Knee deformity                                  | 1 (<0.1%)     | 0             | 1 (<0.1%)     |
| Ligament calcification                          | 0             | 1 (<0.1%)     | 1 (<0.1%)     |
| Medial tibial stress syndrome                   | 1 (<0.1%)     | 0             | 1 (<0.1%)     |
| Muscle contracture                              | 1 (<0.1%)     | 0             | 1 (<0.1%)     |
| Muscle disorder                                 | 0             | 1 (<0.1%)     | 1 (<0.1%)     |
| Muscle spasms                                   | 4 ( 0.3%)     | 5 ( 0.3%)     | 9 ( 0.3%)     |
| Muscle tightness                                | 9 ( 0.6%)     | 3 ( 0.2%)     | 12 ( 0.4%)    |
| Muscular weakness                               | 1 (<0.1%)     | 1 (<0.1%)     | 2 (<0.1%)     |
| Musculoskeletal chest pain                      | 1 (<0.1%)     | 0             | 1 (<0.1%)     |
| Musculoskeletal discomfort                      | 1 (<0.1%)     | 0             | 1 (<0.1%)     |
| Musculoskeletal pain                            | 7 ( 0.5%)     | 10 ( 0.7%)    | 17 ( 0.6%)    |
| Myalgia                                         | 9 ( 0.6%)     | 8 ( 0.6%)     | 17 ( 0.6%)    |
| Myokymia                                        | 0             | 2 ( 0.1%)     | 2 (<0.1%)     |
| Myositis                                        | 1 (<0.1%)     | 0             | 1 (<0.1%)     |
| Neck mass                                       | 0             | 1 (<0.1%)     | 1 (<0.1%)     |
| Neck pain                                       | 2 ( 0.1%)     | 8 ( 0.6%)     | 10 ( 0.3%)    |
| Osteitis                                        | 0             | 1 (<0.1%)     | 1 (<0.1%)     |
| Osteoarthritis                                  | 2 ( 0.1%)     | 2 ( 0.1%)     | 4 ( 0.1%)     |
| Osteochondrosis                                 | 3 ( 0.2%)     | 0             | 3 ( 0.1%)     |
| Osteonecrosis                                   | 1 (<0.1%)     | 0             | 1 (<0.1%)     |
| Osteopenia                                      | 1 (<0.1%)     | 1 (<0.1%)     | 2 (<0.1%)     |
| Pain in extremity                               | 6 ( 0.4%)     | 7 ( 0.5%)     | 13 ( 0.5%)    |
| Pain in jaw                                     | 0             | 1 (<0.1%)     | 1 (<0.1%)     |

**Table 14.3.1 / 4: Number of subjects with baseline findings or medical history by MedDRA SOC/PT (FAS)**

| Primary system organ class<br>Preferred term<br>MedDRA version 14.0 | LCS12<br>N=1432 (100%) | LCS16<br>N=1452 (100%) | Total<br>N=2884 (100%) |
|---------------------------------------------------------------------|------------------------|------------------------|------------------------|
| Patellofemoral pain syndrome                                        | 1 ( <0.1%)             | 5 ( 0.3%)              | 6 ( 0.2%)              |
| Plantar fasciitis                                                   | 1 ( <0.1%)             | 2 ( 0.1%)              | 3 ( 0.1%)              |
| Rheumatoid arthritis                                                | 3 ( 0.2%)              | 2 ( 0.1%)              | 5 ( 0.2%)              |
| Rotator cuff syndrome                                               | 0                      | 1 ( <0.1%)             | 1 ( <0.1%)             |
| Sacroiliitis                                                        | 1 ( <0.1%)             | 0                      | 1 ( <0.1%)             |
| Scleroderma                                                         | 0                      | 1 ( <0.1%)             | 1 ( <0.1%)             |
| Scoliosis                                                           | 7 ( 0.5%)              | 7 ( 0.5%)              | 14 ( 0.5%)             |
| Seronegative arthritis                                              | 0                      | 1 ( <0.1%)             | 1 ( <0.1%)             |
| Spinal osteoarthritis                                               | 0                      | 1 ( <0.1%)             | 1 ( <0.1%)             |
| Synovial cyst                                                       | 1 ( <0.1%)             | 2 ( 0.1%)              | 3 ( 0.1%)              |
| Temporomandibular joint syndrome                                    | 4 ( 0.3%)              | 1 ( <0.1%)             | 5 ( 0.2%)              |
| Tendonitis                                                          | 3 ( 0.2%)              | 7 ( 0.5%)              | 10 ( 0.3%)             |
| Tenosynovitis                                                       | 1 ( <0.1%)             | 0                      | 1 ( <0.1%)             |
| Tenosynovitis stenosans                                             | 0                      | 1 ( <0.1%)             | 1 ( <0.1%)             |
| Trigger finger                                                      | 0                      | 1 ( <0.1%)             | 1 ( <0.1%)             |

**Table 14.3.1 / 4: Number of subjects with baseline findings or medical history by MedDRA SOC/PT (FAS)**

| Primary system organ class<br>Preferred term<br>MedDRA version 14.0 | LCS12<br>N=1432 (100%) | LCS16<br>N=1452 (100%) | Total<br>N=2884 (100%) |
|---------------------------------------------------------------------|------------------------|------------------------|------------------------|
| Neoplasms benign, malignant and unspecified (incl cysts and polyps) | 57 ( 4.0%)             | 65 ( 4.5%)             | 122 ( 4.2%)            |
| Acrochordon                                                         | 0                      | 2 ( 0.1%)              | 2 ( <0.1%)             |
| Acute lymphocytic leukaemia                                         | 0                      | 1 ( <0.1%)             | 1 ( <0.1%)             |
| Adenoma benign                                                      | 0                      | 1 ( <0.1%)             | 1 ( <0.1%)             |
| Ameloblastoma                                                       | 0                      | 1 ( <0.1%)             | 1 ( <0.1%)             |
| Benign bone neoplasm                                                | 1 ( <0.1%)             | 0                      | 1 ( <0.1%)             |
| Benign breast neoplasm                                              | 0                      | 6 ( 0.4%)              | 6 ( 0.2%)              |
| Benign gastric neoplasm                                             | 0                      | 1 ( <0.1%)             | 1 ( <0.1%)             |
| Benign hydatidiform mole                                            | 0                      | 1 ( <0.1%)             | 1 ( <0.1%)             |
| Benign neoplasm                                                     | 0                      | 1 ( <0.1%)             | 1 ( <0.1%)             |
| Benign neoplasm of cervix uteri                                     | 1 ( <0.1%)             | 0                      | 1 ( <0.1%)             |
| Benign neoplasm of skin                                             | 2 ( 0.1%)              | 2 ( 0.1%)              | 4 ( 0.1%)              |
| Benign neoplasm of thyroid gland                                    | 1 ( <0.1%)             | 0                      | 1 ( <0.1%)             |
| Benign neoplasm of urethra                                          | 1 ( <0.1%)             | 0                      | 1 ( <0.1%)             |
| Benign salivary gland neoplasm                                      | 1 ( <0.1%)             | 1 ( <0.1%)             | 2 ( <0.1%)             |
| Bone giant cell tumour benign                                       | 1 ( <0.1%)             | 0                      | 1 ( <0.1%)             |
| Bone neoplasm                                                       | 1 ( <0.1%)             | 0                      | 1 ( <0.1%)             |
| Breast fibroma                                                      | 1 ( <0.1%)             | 1 ( <0.1%)             | 2 ( <0.1%)             |
| Cervicitis human papilloma virus                                    | 14 ( 1.0%)             | 16 ( 1.1%)             | 30 ( 1.0%)             |
| Fibroadenoma of breast                                              | 10 ( 0.7%)             | 1 ( <0.1%)             | 11 ( 0.4%)             |
| Fibroma                                                             | 0                      | 1 ( <0.1%)             | 1 ( <0.1%)             |
| Glomus tumour                                                       | 1 ( <0.1%)             | 0                      | 1 ( <0.1%)             |
| Haemangioma of skin                                                 | 1 ( <0.1%)             | 1 ( <0.1%)             | 2 ( <0.1%)             |
| Juvenile melanoma benign                                            | 0                      | 1 ( <0.1%)             | 1 ( <0.1%)             |
| Lipoma                                                              | 4 ( 0.3%)              | 0                      | 4 ( 0.1%)              |
| Lipoma of breast                                                    | 1 ( <0.1%)             | 0                      | 1 ( <0.1%)             |
| Melanocytic naevus                                                  | 4 ( 0.3%)              | 2 ( 0.1%)              | 6 ( 0.2%)              |
| Ovarian adenoma                                                     | 1 ( <0.1%)             | 0                      | 1 ( <0.1%)             |
| Ovarian fibroma                                                     | 1 ( <0.1%)             | 0                      | 1 ( <0.1%)             |
| Ovarian germ cell teratoma benign                                   | 2 ( 0.1%)              | 3 ( 0.2%)              | 5 ( 0.2%)              |
| Prolactinoma                                                        | 1 ( <0.1%)             | 0                      | 1 ( <0.1%)             |
| Skin papilloma                                                      | 1 ( <0.1%)             | 1 ( <0.1%)             | 2 ( <0.1%)             |
| Uterine leiomyoma                                                   | 6 ( 0.4%)              | 10 ( 0.7%)             | 16 ( 0.6%)             |
| Vulvovaginal human papilloma virus infection                        | 3 ( 0.2%)              | 13 ( 0.9%)             | 16 ( 0.6%)             |

**Table 14.3.1 / 4: Number of subjects with baseline findings or medical history by MedDRA SOC/PT (FAS)**

| Primary system organ class<br>Preferred term<br>MedDRA version 14.0 | LCS12<br>N=1432 (100%) | LCS16<br>N=1452 (100%) | Total<br>N=2884 (100%) |
|---------------------------------------------------------------------|------------------------|------------------------|------------------------|
| Nervous system disorders                                            | 364 ( 25.4%)           | 394 ( 27.1%)           | 758 ( 26.3%)           |
| Ageusia                                                             | 0                      | 1 (<0.1%)              | 1 (<0.1%)              |
| Benign intracranial hypertension                                    | 1 (<0.1%)              | 1 (<0.1%)              | 2 (<0.1%)              |
| Carpal tunnel syndrome                                              | 3 ( 0.2%)              | 2 ( 0.1%)              | 5 ( 0.2%)              |
| Central auditory processing disorder                                | 1 (<0.1%)              | 0                      | 1 (<0.1%)              |
| Cerebral infarction                                                 | 0                      | 1 (<0.1%)              | 1 (<0.1%)              |
| Cerebrovascular accident                                            | 1 (<0.1%)              | 0                      | 1 (<0.1%)              |
| Cervicobrachial syndrome                                            | 0                      | 1 (<0.1%)              | 1 (<0.1%)              |
| Cervicogenic headache                                               | 1 (<0.1%)              | 0                      | 1 (<0.1%)              |
| Cluster headache                                                    | 2 ( 0.1%)              | 0                      | 2 (<0.1%)              |
| Coma                                                                | 0                      | 1 (<0.1%)              | 1 (<0.1%)              |
| Complex regional pain syndrome                                      | 1 (<0.1%)              | 0                      | 1 (<0.1%)              |
| Convulsion                                                          | 2 ( 0.1%)              | 6 ( 0.4%)              | 8 ( 0.3%)              |
| Disturbance in attention                                            | 0                      | 1 (<0.1%)              | 1 (<0.1%)              |
| Dizziness                                                           | 1 (<0.1%)              | 2 ( 0.1%)              | 3 ( 0.1%)              |
| Epilepsy                                                            | 6 ( 0.4%)              | 7 ( 0.5%)              | 13 ( 0.5%)             |
| Essential tremor                                                    | 0                      | 1 (<0.1%)              | 1 (<0.1%)              |
| Febrile convulsion                                                  | 1 (<0.1%)              | 0                      | 1 (<0.1%)              |
| Guillain-Barre syndrome                                             | 0                      | 1 (<0.1%)              | 1 (<0.1%)              |
| Headache                                                            | 209 ( 14.6%)           | 226 ( 15.6%)           | 435 ( 15.1%)           |
| Hemianopia                                                          | 1 (<0.1%)              | 0                      | 1 (<0.1%)              |
| Hypersomnia                                                         | 0                      | 1 (<0.1%)              | 1 (<0.1%)              |
| Hypertonia                                                          | 1 (<0.1%)              | 1 (<0.1%)              | 2 (<0.1%)              |
| Memory impairment                                                   | 0                      | 1 (<0.1%)              | 1 (<0.1%)              |
| Migraine                                                            | 115 ( 8.0%)            | 127 ( 8.7%)            | 242 ( 8.4%)            |
| Migraine with aura                                                  | 6 ( 0.4%)              | 7 ( 0.5%)              | 13 ( 0.5%)             |
| Migraine without aura                                               | 1 (<0.1%)              | 1 (<0.1%)              | 2 (<0.1%)              |
| Myasthenia gravis                                                   | 0                      | 1 (<0.1%)              | 1 (<0.1%)              |
| Myotonia                                                            | 2 ( 0.1%)              | 0                      | 2 (<0.1%)              |
| Nerve compression                                                   | 0                      | 2 ( 0.1%)              | 2 (<0.1%)              |
| Nystagmus                                                           | 1 (<0.1%)              | 0                      | 1 (<0.1%)              |
| Optic neuritis                                                      | 1 (<0.1%)              | 0                      | 1 (<0.1%)              |
| Paraesthesia                                                        | 0                      | 1 (<0.1%)              | 1 (<0.1%)              |
| Paraparesis                                                         | 1 (<0.1%)              | 0                      | 1 (<0.1%)              |
| Restless legs syndrome                                              | 2 ( 0.1%)              | 1 (<0.1%)              | 3 ( 0.1%)              |
| Sciatica                                                            | 5 ( 0.3%)              | 0                      | 5 ( 0.2%)              |
| Sinus headache                                                      | 5 ( 0.3%)              | 5 ( 0.3%)              | 10 ( 0.3%)             |
| Syncope                                                             | 2 ( 0.1%)              | 1 (<0.1%)              | 3 ( 0.1%)              |
| Tension headache                                                    | 42 ( 2.9%)             | 43 ( 3.0%)             | 85 ( 2.9%)             |
| Tremor                                                              | 1 (<0.1%)              | 0                      | 1 (<0.1%)              |
| Vascular headache                                                   | 0                      | 1 (<0.1%)              | 1 (<0.1%)              |

**Table 14.3.1 / 4: Number of subjects with baseline findings or medical history by MedDRA SOC/PT (FAS)**

| Primary system organ class<br>Preferred term<br>MedDRA version 14.0 | LCS12<br>N=1432 (100%) | LCS16<br>N=1452 (100%) | Total<br>N=2884 (100%) |
|---------------------------------------------------------------------|------------------------|------------------------|------------------------|
| Pregnancy, puerperium and perinatal conditions                      | 79 ( 5.5%)             | 90 ( 6.2%)             | 169 ( 5.9%)            |
| Abortion                                                            | 28 ( 2.0%)             | 25 ( 1.7%)             | 53 ( 1.8%)             |
| Abortion incomplete                                                 | 1 (<0.1%)              | 0                      | 1 (<0.1%)              |
| Abortion missed                                                     | 0                      | 1 (<0.1%)              | 1 (<0.1%)              |
| Abortion spontaneous                                                | 16 ( 1.1%)             | 20 ( 1.4%)             | 36 ( 1.2%)             |
| Abortion spontaneous incomplete                                     | 0                      | 1 (<0.1%)              | 1 (<0.1%)              |
| Antepartum haemorrhage                                              | 2 ( 0.1%)              | 3 ( 0.2%)              | 5 ( 0.2%)              |
| Arrested labour                                                     | 1 (<0.1%)              | 0                      | 1 (<0.1%)              |
| Cervical incompetence                                               | 1 (<0.1%)              | 0                      | 1 (<0.1%)              |
| Delivery                                                            | 21 ( 1.5%)             | 31 ( 2.1%)             | 52 ( 1.8%)             |
| Ectopic pregnancy                                                   | 1 (<0.1%)              | 0                      | 1 (<0.1%)              |
| Foetal distress syndrome                                            | 3 ( 0.2%)              | 1 (<0.1%)              | 4 ( 0.1%)              |
| Gestational hypertension                                            | 2 ( 0.1%)              | 4 ( 0.3%)              | 6 ( 0.2%)              |
| HELLP syndrome                                                      | 1 (<0.1%)              | 0                      | 1 (<0.1%)              |
| Placenta praevia haemorrhage                                        | 1 (<0.1%)              | 0                      | 1 (<0.1%)              |
| Placental insufficiency                                             | 1 (<0.1%)              | 0                      | 1 (<0.1%)              |
| Postpartum haemorrhage                                              | 1 (<0.1%)              | 3 ( 0.2%)              | 4 ( 0.1%)              |
| Pre-eclampsia                                                       | 4 ( 0.3%)              | 5 ( 0.3%)              | 9 ( 0.3%)              |
| Pregnancy                                                           | 1 (<0.1%)              | 1 (<0.1%)              | 2 (<0.1%)              |
| Pregnancy with contraceptive device                                 | 1 (<0.1%)              | 1 (<0.1%)              | 2 (<0.1%)              |
| Premature labour                                                    | 1 (<0.1%)              | 0                      | 1 (<0.1%)              |
| Premature separation of placenta                                    | 0                      | 1 (<0.1%)              | 1 (<0.1%)              |
| Retained placenta or membranes                                      | 0                      | 1 (<0.1%)              | 1 (<0.1%)              |
| Stillbirth                                                          | 0                      | 1 (<0.1%)              | 1 (<0.1%)              |
| Traumatic delivery                                                  | 0                      | 1 (<0.1%)              | 1 (<0.1%)              |
| Twin pregnancy                                                      | 1 (<0.1%)              | 1 (<0.1%)              | 2 (<0.1%)              |



**Table 14.3.1 / 4: Number of subjects with baseline findings or medical history by MedDRA SOC/PT (FAS)**

| Primary system organ class<br>Preferred term<br>MedDRA version 14.0 | LCS12<br>N=1432 (100%) | LCS16<br>N=1452 (100%) | Total<br>N=2884 (100%) |
|---------------------------------------------------------------------|------------------------|------------------------|------------------------|
| Psychiatric disorders                                               | 190 ( 13.3%)           | 195 ( 13.4%)           | 385 ( 13.3%)           |
| Alcohol abuse                                                       | 0                      | 3 ( 0.2%)              | 3 ( 0.1%)              |
| Alcoholism                                                          | 0                      | 1 (<0.1%)              | 1 (<0.1%)              |
| Anorgasmia                                                          | 0                      | 2 ( 0.1%)              | 2 (<0.1%)              |
| Anxiety                                                             | 57 ( 4.0%)             | 60 ( 4.1%)             | 117 ( 4.1%)            |
| Anxiety disorder                                                    | 1 (<0.1%)              | 1 (<0.1%)              | 2 (<0.1%)              |
| Attention deficit/hyperactivity disorder                            | 8 ( 0.6%)              | 11 ( 0.8%)             | 19 ( 0.7%)             |
| Bipolar I disorder                                                  | 1 (<0.1%)              | 0                      | 1 (<0.1%)              |
| Bipolar disorder                                                    | 1 (<0.1%)              | 7 ( 0.5%)              | 8 ( 0.3%)              |
| Borderline personality disorder                                     | 0                      | 2 ( 0.1%)              | 2 (<0.1%)              |
| Brief psychotic disorder, with postpartum onset                     | 0                      | 1 (<0.1%)              | 1 (<0.1%)              |
| Bruxism                                                             | 1 (<0.1%)              | 0                      | 1 (<0.1%)              |
| Bulimia nervosa                                                     | 1 (<0.1%)              | 2 ( 0.1%)              | 3 ( 0.1%)              |
| Burnout syndrome                                                    | 1 (<0.1%)              | 2 ( 0.1%)              | 3 ( 0.1%)              |
| Depressed mood                                                      | 1 (<0.1%)              | 1 (<0.1%)              | 2 (<0.1%)              |
| Depression                                                          | 101 ( 7.1%)            | 82 ( 5.6%)             | 183 ( 6.3%)            |
| Drug abuse                                                          | 0                      | 4 ( 0.3%)              | 4 ( 0.1%)              |
| Eating disorder                                                     | 2 ( 0.1%)              | 0                      | 2 (<0.1%)              |
| Encopresis                                                          | 0                      | 1 (<0.1%)              | 1 (<0.1%)              |
| Generalised anxiety disorder                                        | 3 ( 0.2%)              | 0                      | 3 ( 0.1%)              |
| Hypochondriasis                                                     | 1 (<0.1%)              | 0                      | 1 (<0.1%)              |
| Insomnia                                                            | 28 ( 2.0%)             | 36 ( 2.5%)             | 64 ( 2.2%)             |
| Libido decreased                                                    | 5 ( 0.3%)              | 7 ( 0.5%)              | 12 ( 0.4%)             |
| Major depression                                                    | 1 (<0.1%)              | 0                      | 1 (<0.1%)              |
| Mood altered                                                        | 1 (<0.1%)              | 0                      | 1 (<0.1%)              |
| Mood swings                                                         | 2 ( 0.1%)              | 2 ( 0.1%)              | 4 ( 0.1%)              |
| Nicotine dependence                                                 | 1 (<0.1%)              | 0                      | 1 (<0.1%)              |
| Obsessive-compulsive disorder                                       | 2 ( 0.1%)              | 1 (<0.1%)              | 3 ( 0.1%)              |
| Panic attack                                                        | 2 ( 0.1%)              | 5 ( 0.3%)              | 7 ( 0.2%)              |
| Panic disorder                                                      | 2 ( 0.1%)              | 4 ( 0.3%)              | 6 ( 0.2%)              |
| Panic reaction                                                      | 0                      | 1 (<0.1%)              | 1 (<0.1%)              |
| Phobia                                                              | 1 (<0.1%)              | 0                      | 1 (<0.1%)              |
| Phobia of flying                                                    | 1 (<0.1%)              | 1 (<0.1%)              | 2 (<0.1%)              |
| Post-traumatic stress disorder                                      | 0                      | 1 (<0.1%)              | 1 (<0.1%)              |
| Postpartum depression                                               | 8 ( 0.6%)              | 12 ( 0.8%)             | 20 ( 0.7%)             |
| Psychotic disorder                                                  | 0                      | 1 (<0.1%)              | 1 (<0.1%)              |
| Seasonal affective disorder                                         | 1 (<0.1%)              | 2 ( 0.1%)              | 3 ( 0.1%)              |
| Sleep disorder                                                      | 3 ( 0.2%)              | 1 (<0.1%)              | 4 ( 0.1%)              |
| Social phobia                                                       | 0                      | 1 (<0.1%)              | 1 (<0.1%)              |
| Stress                                                              | 1 (<0.1%)              | 1 (<0.1%)              | 2 (<0.1%)              |

**Table 14.3.1 / 4: Number of subjects with baseline findings or medical history by MedDRA SOC/PT (FAS)**

| Primary system organ class<br>Preferred term<br>MedDRA version 14.0 | LCS12<br>N=1432 (100%) | LCS16<br>N=1452 (100%) | Total<br>N=2884 (100%) |
|---------------------------------------------------------------------|------------------------|------------------------|------------------------|
| Renal and urinary disorders                                         | 32 ( 2.2%)             | 30 ( 2.1%)             | 62 ( 2.1%)             |
| Bladder cyst                                                        | 1 (<0.1%)              | 0                      | 1 (<0.1%)              |
| Calculus urinary                                                    | 1 (<0.1%)              | 0                      | 1 (<0.1%)              |
| Cystitis interstitial                                               | 3 ( 0.2%)              | 3 ( 0.2%)              | 6 ( 0.2%)              |
| Dysuria                                                             | 2 ( 0.1%)              | 1 (<0.1%)              | 3 ( 0.1%)              |
| Haematuria                                                          | 2 ( 0.1%)              | 0                      | 2 (<0.1%)              |
| Hydronephrosis                                                      | 1 (<0.1%)              | 0                      | 1 (<0.1%)              |
| Incontinence                                                        | 0                      | 1 (<0.1%)              | 1 (<0.1%)              |
| Micturition urgency                                                 | 2 ( 0.1%)              | 1 (<0.1%)              | 3 ( 0.1%)              |
| Nephrolithiasis                                                     | 9 ( 0.6%)              | 14 ( 1.0%)             | 23 ( 0.8%)             |
| Pollakiuria                                                         | 2 ( 0.1%)              | 1 (<0.1%)              | 3 ( 0.1%)              |
| Renal colic                                                         | 1 (<0.1%)              | 3 ( 0.2%)              | 4 ( 0.1%)              |
| Renal disorder in pregnancy                                         | 0                      | 1 (<0.1%)              | 1 (<0.1%)              |
| Renal failure chronic                                               | 1 (<0.1%)              | 0                      | 1 (<0.1%)              |
| Stress urinary incontinence                                         | 7 ( 0.5%)              | 4 ( 0.3%)              | 11 ( 0.4%)             |
| Urinary incontinence                                                | 2 ( 0.1%)              | 0                      | 2 (<0.1%)              |
| Urinary retention                                                   | 0                      | 1 (<0.1%)              | 1 (<0.1%)              |
| Urinary tract disorder                                              | 1 (<0.1%)              | 0                      | 1 (<0.1%)              |
| Urinary tract inflammation                                          | 0                      | 1 (<0.1%)              | 1 (<0.1%)              |

**Table 14.3.1 / 4: Number of subjects with baseline findings or medical history by MedDRA SOC/PT (FAS)**

| Primary system organ class<br>Preferred term<br>MedDRA version 14.0 | LCS12<br>N=1432 (100%) | LCS16<br>N=1452 (100%) | Total<br>N=2884 (100%) |
|---------------------------------------------------------------------|------------------------|------------------------|------------------------|
| Reproductive system and breast disorders                            | 386 ( 27.0%)           | 413 ( 28.4%)           | 799 ( 27.7%)           |
| Adenomyosis                                                         | 0                      | 1 (<0.1%)              | 1 (<0.1%)              |
| Adnexa uteri mass                                                   | 1 (<0.1%)              | 0                      | 1 (<0.1%)              |
| Adnexa uteri pain                                                   | 1 (<0.1%)              | 0                      | 1 (<0.1%)              |
| Amenorrhoea                                                         | 3 ( 0.2%)              | 5 ( 0.3%)              | 8 ( 0.3%)              |
| Bartholin's cyst                                                    | 2 ( 0.1%)              | 0                      | 2 (<0.1%)              |
| Bartholinitis                                                       | 2 ( 0.1%)              | 0                      | 2 (<0.1%)              |
| Breast atrophy                                                      | 1 (<0.1%)              | 0                      | 1 (<0.1%)              |
| Breast calcifications                                               | 0                      | 1 (<0.1%)              | 1 (<0.1%)              |
| Breast cyst                                                         | 4 ( 0.3%)              | 2 ( 0.1%)              | 6 ( 0.2%)              |
| Breast discomfort                                                   | 3 ( 0.2%)              | 6 ( 0.4%)              | 9 ( 0.3%)              |
| Breast enlargement                                                  | 1 (<0.1%)              | 1 (<0.1%)              | 2 (<0.1%)              |
| Breast mass                                                         | 7 ( 0.5%)              | 3 ( 0.2%)              | 10 ( 0.3%)             |
| Breast pain                                                         | 3 ( 0.2%)              | 3 ( 0.2%)              | 6 ( 0.2%)              |
| Breast tenderness                                                   | 0                      | 1 (<0.1%)              | 1 (<0.1%)              |
| Cervical cyst                                                       | 1 (<0.1%)              | 1 (<0.1%)              | 2 (<0.1%)              |
| Cervical dysplasia                                                  | 61 ( 4.3%)             | 65 ( 4.5%)             | 126 ( 4.4%)            |
| Cervical friability                                                 | 0                      | 1 (<0.1%)              | 1 (<0.1%)              |
| Cervical polyp                                                      | 1 (<0.1%)              | 2 ( 0.1%)              | 3 ( 0.1%)              |
| Cervix haemorrhage uterine                                          | 0                      | 1 (<0.1%)              | 1 (<0.1%)              |
| Cervix inflammation                                                 | 2 ( 0.1%)              | 1 (<0.1%)              | 3 ( 0.1%)              |
| Coital bleeding                                                     | 2 ( 0.1%)              | 0                      | 2 (<0.1%)              |
| Dysfunctional uterine bleeding                                      | 0                      | 1 (<0.1%)              | 1 (<0.1%)              |
| Dysmenorrhoea                                                       | 211 ( 14.7%)           | 242 ( 16.7%)           | 453 ( 15.7%)           |
| Dyspareunia                                                         | 7 ( 0.5%)              | 11 ( 0.8%)             | 18 ( 0.6%)             |
| Ectropion of cervix                                                 | 2 ( 0.1%)              | 2 ( 0.1%)              | 4 ( 0.1%)              |
| Endometriosis                                                       | 15 ( 1.0%)             | 17 ( 1.2%)             | 32 ( 1.1%)             |
| Fallopian tube cyst                                                 | 2 ( 0.1%)              | 0                      | 2 (<0.1%)              |
| Fallopian tube obstruction                                          | 0                      | 1 (<0.1%)              | 1 (<0.1%)              |
| Fibrocystic breast disease                                          | 11 ( 0.8%)             | 10 ( 0.7%)             | 21 ( 0.7%)             |
| Galactorrhoea                                                       | 3 ( 0.2%)              | 3 ( 0.2%)              | 6 ( 0.2%)              |
| Genital discharge                                                   | 1 (<0.1%)              | 5 ( 0.3%)              | 6 ( 0.2%)              |
| Haematocolpos                                                       | 1 (<0.1%)              | 0                      | 1 (<0.1%)              |
| Haemorrhagic ovarian cyst                                           | 1 (<0.1%)              | 1 (<0.1%)              | 2 (<0.1%)              |
| Hydrometra                                                          | 1 (<0.1%)              | 0                      | 1 (<0.1%)              |
| Infertility                                                         | 2 ( 0.1%)              | 0                      | 2 (<0.1%)              |
| Infertility female                                                  | 1 (<0.1%)              | 0                      | 1 (<0.1%)              |
| Infertility male                                                    | 0                      | 1 (<0.1%)              | 1 (<0.1%)              |
| Labia enlarged                                                      | 0                      | 1 (<0.1%)              | 1 (<0.1%)              |
| Mastoptosis                                                         | 1 (<0.1%)              | 0                      | 1 (<0.1%)              |
| Menometrorrhagia                                                    | 2 ( 0.1%)              | 0                      | 2 (<0.1%)              |
| Menorrhagia                                                         | 17 ( 1.2%)             | 17 ( 1.2%)             | 34 ( 1.2%)             |
| Menstruation delayed                                                | 1 (<0.1%)              | 0                      | 1 (<0.1%)              |
| Menstruation irregular                                              | 5 ( 0.3%)              | 2 ( 0.1%)              | 7 ( 0.2%)              |

**Table 14.3.1 / 4: Number of subjects with baseline findings or medical history by MedDRA SOC/PT (FAS)**

| Primary system organ class<br>Preferred term<br>MedDRA version 14.0 | LCS12<br>N=1432 (100%) | LCS16<br>N=1452 (100%) | Total<br>N=2884 (100%) |
|---------------------------------------------------------------------|------------------------|------------------------|------------------------|
| Metrorrhagia                                                        | 3 ( 0.2%)              | 6 ( 0.4%)              | 9 ( 0.3%)              |
| Nipple disorder                                                     | 0                      | 1 (<0.1%)              | 1 (<0.1%)              |
| Ovarian atrophy                                                     | 1 (<0.1%)              | 0                      | 1 (<0.1%)              |
| Ovarian cyst                                                        | 43 ( 3.0%)             | 42 ( 2.9%)             | 85 ( 2.9%)             |
| Ovarian cyst ruptured                                               | 2 ( 0.1%)              | 1 (<0.1%)              | 3 ( 0.1%)              |
| Ovulation pain                                                      | 1 (<0.1%)              | 0                      | 1 (<0.1%)              |
| Parovarian cyst                                                     | 2 ( 0.1%)              | 0                      | 2 (<0.1%)              |
| Pelvic adhesions                                                    | 0                      | 1 (<0.1%)              | 1 (<0.1%)              |
| Pelvic discomfort                                                   | 1 (<0.1%)              | 0                      | 1 (<0.1%)              |
| Pelvic pain                                                         | 2 ( 0.1%)              | 8 ( 0.6%)              | 10 ( 0.3%)             |
| Pelvic prolapse                                                     | 1 (<0.1%)              | 0                      | 1 (<0.1%)              |
| Polycystic ovaries                                                  | 6 ( 0.4%)              | 6 ( 0.4%)              | 12 ( 0.4%)             |
| Polymenorrhagia                                                     | 0                      | 1 (<0.1%)              | 1 (<0.1%)              |
| Premenstrual syndrome                                               | 35 ( 2.4%)             | 38 ( 2.6%)             | 73 ( 2.5%)             |
| Rectocele                                                           | 1 (<0.1%)              | 0                      | 1 (<0.1%)              |
| Uterine atony                                                       | 0                      | 1 (<0.1%)              | 1 (<0.1%)              |
| Uterine cervical erosion                                            | 1 (<0.1%)              | 0                      | 1 (<0.1%)              |
| Uterine cervical pain                                               | 1 (<0.1%)              | 0                      | 1 (<0.1%)              |
| Uterine cervical squamous metaplasia                                | 0                      | 1 (<0.1%)              | 1 (<0.1%)              |
| Uterine cervix stenosis                                             | 0                      | 2 ( 0.1%)              | 2 (<0.1%)              |
| Uterine haemorrhage                                                 | 0                      | 1 (<0.1%)              | 1 (<0.1%)              |
| Uterine polyp                                                       | 0                      | 1 (<0.1%)              | 1 (<0.1%)              |
| Uterine spasm                                                       | 2 ( 0.1%)              | 1 (<0.1%)              | 3 ( 0.1%)              |
| Vaginal cyst                                                        | 1 (<0.1%)              | 1 (<0.1%)              | 2 (<0.1%)              |
| Vaginal discharge                                                   | 1 (<0.1%)              | 10 ( 0.7%)             | 11 ( 0.4%)             |
| Vaginal disorder                                                    | 4 ( 0.3%)              | 1 (<0.1%)              | 5 ( 0.2%)              |
| Vaginal haemorrhage                                                 | 6 ( 0.4%)              | 2 ( 0.1%)              | 8 ( 0.3%)              |
| Vaginal lesion                                                      | 0                      | 1 (<0.1%)              | 1 (<0.1%)              |
| Vaginal stricture                                                   | 0                      | 1 (<0.1%)              | 1 (<0.1%)              |
| Varicocele                                                          | 1 (<0.1%)              | 0                      | 1 (<0.1%)              |
| Varicose veins vaginal                                              | 1 (<0.1%)              | 0                      | 1 (<0.1%)              |
| Vulva cyst                                                          | 0                      | 1 (<0.1%)              | 1 (<0.1%)              |
| Vulval disorder                                                     | 0                      | 1 (<0.1%)              | 1 (<0.1%)              |
| Vulval leukoplakia                                                  | 0                      | 1 (<0.1%)              | 1 (<0.1%)              |
| Vulvovaginal burning sensation                                      | 1 (<0.1%)              | 1 (<0.1%)              | 2 (<0.1%)              |
| Vulvovaginal discomfort                                             | 0                      | 1 (<0.1%)              | 1 (<0.1%)              |
| Vulvovaginal dryness                                                | 1 (<0.1%)              | 2 ( 0.1%)              | 3 ( 0.1%)              |
| Vulvovaginal erythema                                               | 2 ( 0.1%)              | 0                      | 2 (<0.1%)              |
| Vulvovaginal pain                                                   | 3 ( 0.2%)              | 1 (<0.1%)              | 4 ( 0.1%)              |
| Vulvovaginal pruritus                                               | 0                      | 2 ( 0.1%)              | 2 (<0.1%)              |

**Table 14.3.1 / 4: Number of subjects with baseline findings or medical history by MedDRA SOC/PT (FAS)**

| Primary system organ class<br>Preferred term<br>MedDRA version 14.0 | LCS12<br>N=1432 (100%) | LCS16<br>N=1452 (100%) | Total<br>N=2884 (100%) |
|---------------------------------------------------------------------|------------------------|------------------------|------------------------|
| Respiratory, thoracic and mediastinal disorders                     | 125 ( 8.7%)            | 151 ( 10.4%)           | 276 ( 9.6%)            |
| Adenoidal disorder                                                  | 1 (<0.1%)              | 0                      | 1 (<0.1%)              |
| Allergic bronchitis                                                 | 1 (<0.1%)              | 0                      | 1 (<0.1%)              |
| Allergic respiratory disease                                        | 0                      | 1 (<0.1%)              | 1 (<0.1%)              |
| Allergic sinusitis                                                  | 2 ( 0.1%)              | 0                      | 2 (<0.1%)              |
| Asthma                                                              | 67 ( 4.7%)             | 92 ( 6.3%)             | 159 ( 5.5%)            |
| Asthma exercise induced                                             | 8 ( 0.6%)              | 7 ( 0.5%)              | 15 ( 0.5%)             |
| Asthmatic crisis                                                    | 1 (<0.1%)              | 0                      | 1 (<0.1%)              |
| Bronchitis chronic                                                  | 4 ( 0.3%)              | 0                      | 4 ( 0.1%)              |
| Bronchospasm                                                        | 2 ( 0.1%)              | 0                      | 2 (<0.1%)              |
| Chronic respiratory disease                                         | 1 (<0.1%)              | 0                      | 1 (<0.1%)              |
| Cough                                                               | 3 ( 0.2%)              | 5 ( 0.3%)              | 8 ( 0.3%)              |
| Dysphonia                                                           | 0                      | 1 (<0.1%)              | 1 (<0.1%)              |
| Dyspnoea                                                            | 1 (<0.1%)              | 0                      | 1 (<0.1%)              |
| Epistaxis                                                           | 0                      | 2 ( 0.1%)              | 2 (<0.1%)              |
| Hyperventilation                                                    | 0                      | 1 (<0.1%)              | 1 (<0.1%)              |
| Infantile asthma                                                    | 1 (<0.1%)              | 1 (<0.1%)              | 2 (<0.1%)              |
| Nasal congestion                                                    | 0                      | 1 (<0.1%)              | 1 (<0.1%)              |
| Nasal disorder                                                      | 1 (<0.1%)              | 0                      | 1 (<0.1%)              |
| Nasal obstruction                                                   | 0                      | 1 (<0.1%)              | 1 (<0.1%)              |
| Nasal septum deviation                                              | 5 ( 0.3%)              | 5 ( 0.3%)              | 10 ( 0.3%)             |
| Oropharyngeal pain                                                  | 4 ( 0.3%)              | 5 ( 0.3%)              | 9 ( 0.3%)              |
| Pneumothorax                                                        | 1 (<0.1%)              | 0                      | 1 (<0.1%)              |
| Productive cough                                                    | 1 (<0.1%)              | 0                      | 1 (<0.1%)              |
| Rhinitis allergic                                                   | 12 ( 0.8%)             | 16 ( 1.1%)             | 28 ( 1.0%)             |
| Rhinitis perennial                                                  | 0                      | 1 (<0.1%)              | 1 (<0.1%)              |
| Rhinitis seasonal                                                   | 11 ( 0.8%)             | 9 ( 0.6%)              | 20 ( 0.7%)             |
| Rhinorrhoea                                                         | 1 (<0.1%)              | 0                      | 1 (<0.1%)              |
| Sinus congestion                                                    | 3 ( 0.2%)              | 8 ( 0.6%)              | 11 ( 0.4%)             |
| Sinus disorder                                                      | 0                      | 1 (<0.1%)              | 1 (<0.1%)              |
| Throat irritation                                                   | 0                      | 1 (<0.1%)              | 1 (<0.1%)              |
| Tonsillar hypertrophy                                               | 1 (<0.1%)              | 0                      | 1 (<0.1%)              |
| Vasomotor rhinitis                                                  | 1 (<0.1%)              | 0                      | 1 (<0.1%)              |
| Vocal cord thickening                                               | 1 (<0.1%)              | 0                      | 1 (<0.1%)              |

**Table 14.3.1 / 4: Number of subjects with baseline findings or medical history by MedDRA SOC/PT (FAS)**

| Primary system organ class<br>Preferred term<br>MedDRA version 14.0 | LCS12<br>N=1432 (100%) | LCS16<br>N=1452 (100%) | Total<br>N=2884 (100%) |
|---------------------------------------------------------------------|------------------------|------------------------|------------------------|
| Skin and subcutaneous tissue disorders                              | 148 ( 10.3%)           | 146 ( 10.1%)           | 294 ( 10.2%)           |
| Acanthosis nigricans                                                | 0                      | 1 (<0.1%)              | 1 (<0.1%)              |
| Acne                                                                | 70 ( 4.9%)             | 73 ( 5.0%)             | 143 ( 5.0%)            |
| Acne cystic                                                         | 1 (<0.1%)              | 1 (<0.1%)              | 2 (<0.1%)              |
| Alopecia                                                            | 1 (<0.1%)              | 1 (<0.1%)              | 2 (<0.1%)              |
| Chloasma                                                            | 0                      | 2 ( 0.1%)              | 2 (<0.1%)              |
| Cutaneous lupus erythematosus                                       | 0                      | 2 ( 0.1%)              | 2 (<0.1%)              |
| Dermal cyst                                                         | 1 (<0.1%)              | 1 (<0.1%)              | 2 (<0.1%)              |
| Dermatitis                                                          | 2 ( 0.1%)              | 2 ( 0.1%)              | 4 ( 0.1%)              |
| Dermatitis allergic                                                 | 2 ( 0.1%)              | 1 (<0.1%)              | 3 ( 0.1%)              |
| Dermatitis atopic                                                   | 15 ( 1.0%)             | 11 ( 0.8%)             | 26 ( 0.9%)             |
| Dermatitis contact                                                  | 2 ( 0.1%)              | 6 ( 0.4%)              | 8 ( 0.3%)              |
| Dry skin                                                            | 3 ( 0.2%)              | 3 ( 0.2%)              | 6 ( 0.2%)              |
| Ecchymosis                                                          | 0                      | 1 (<0.1%)              | 1 (<0.1%)              |
| Eczema                                                              | 25 ( 1.7%)             | 18 ( 1.2%)             | 43 ( 1.5%)             |
| Erythema nodosum                                                    | 1 (<0.1%)              | 0                      | 1 (<0.1%)              |
| Granuloma annulare                                                  | 1 (<0.1%)              | 0                      | 1 (<0.1%)              |
| Heat rash                                                           | 0                      | 1 (<0.1%)              | 1 (<0.1%)              |
| Hirsutism                                                           | 5 ( 0.3%)              | 2 ( 0.1%)              | 7 ( 0.2%)              |
| Hyperhidrosis                                                       | 3 ( 0.2%)              | 0                      | 3 ( 0.1%)              |
| Hyperkeratosis                                                      | 1 (<0.1%)              | 0                      | 1 (<0.1%)              |
| Hypertrichosis                                                      | 0                      | 2 ( 0.1%)              | 2 (<0.1%)              |
| Increased tendency to bruise                                        | 0                      | 2 ( 0.1%)              | 2 (<0.1%)              |
| Ingrowing nail                                                      | 2 ( 0.1%)              | 0                      | 2 (<0.1%)              |
| Keloid scar                                                         | 0                      | 1 (<0.1%)              | 1 (<0.1%)              |
| Keratosis pilaris                                                   | 0                      | 1 (<0.1%)              | 1 (<0.1%)              |
| Lichen sclerosus                                                    | 0                      | 1 (<0.1%)              | 1 (<0.1%)              |
| Night sweats                                                        | 1 (<0.1%)              | 1 (<0.1%)              | 2 (<0.1%)              |
| Photosensitivity allergic reaction                                  | 1 (<0.1%)              | 0                      | 1 (<0.1%)              |
| Photosensitivity reaction                                           | 1 (<0.1%)              | 0                      | 1 (<0.1%)              |
| Pityriasis                                                          | 1 (<0.1%)              | 0                      | 1 (<0.1%)              |
| Pruritus                                                            | 0                      | 1 (<0.1%)              | 1 (<0.1%)              |
| Pruritus generalised                                                | 0                      | 1 (<0.1%)              | 1 (<0.1%)              |
| Psoriasis                                                           | 10 ( 0.7%)             | 11 ( 0.8%)             | 21 ( 0.7%)             |
| Purpura                                                             | 1 (<0.1%)              | 0                      | 1 (<0.1%)              |
| Rash                                                                | 1 (<0.1%)              | 4 ( 0.3%)              | 5 ( 0.2%)              |
| Rash generalised                                                    | 1 (<0.1%)              | 0                      | 1 (<0.1%)              |
| Rosacea                                                             | 3 ( 0.2%)              | 3 ( 0.2%)              | 6 ( 0.2%)              |
| Scar                                                                | 6 ( 0.4%)              | 2 ( 0.1%)              | 8 ( 0.3%)              |
| Seborrhoea                                                          | 0                      | 1 (<0.1%)              | 1 (<0.1%)              |
| Skin fissures                                                       | 0                      | 1 (<0.1%)              | 1 (<0.1%)              |
| Skin hypertrophy                                                    | 0                      | 1 (<0.1%)              | 1 (<0.1%)              |
| Skin irritation                                                     | 1 (<0.1%)              | 0                      | 1 (<0.1%)              |
| Skin mass                                                           | 0                      | 1 (<0.1%)              | 1 (<0.1%)              |

**Table 14.3.1 / 4: Number of subjects with baseline findings or medical history by MedDRA SOC/PT (FAS)**

| Primary system organ class | LCS12         | LCS16         | Total         |
|----------------------------|---------------|---------------|---------------|
| Preferred term             | N=1432 (100%) | N=1452 (100%) | N=2884 (100%) |
| MedDRA version 14.0        |               |               |               |
| Skin striae                | 0             | 1 (<0.1%)     | 1 (<0.1%)     |
| Telangiectasia             | 1 (<0.1%)     | 0             | 1 (<0.1%)     |
| Urticaria                  | 4 ( 0.3%)     | 4 ( 0.3%)     | 8 ( 0.3%)     |
| Vitiligo                   | 1 (<0.1%)     | 0             | 1 (<0.1%)     |
| Social circumstances       | 17 ( 1.2%)    | 21 ( 1.4%)    | 38 ( 1.3%)    |
| Aborted pregnancy          | 7 ( 0.5%)     | 6 ( 0.4%)     | 13 ( 0.5%)    |
| Corrective lens user       | 7 ( 0.5%)     | 9 ( 0.6%)     | 16 ( 0.6%)    |
| Cosmetic body piercing     | 1 (<0.1%)     | 0             | 1 (<0.1%)     |
| Familial risk factor       | 0             | 1 (<0.1%)     | 1 (<0.1%)     |
| Hearing aid user           | 0             | 1 (<0.1%)     | 1 (<0.1%)     |
| Nulliparous                | 0             | 1 (<0.1%)     | 1 (<0.1%)     |
| Organ donor                | 0             | 1 (<0.1%)     | 1 (<0.1%)     |
| Orthosis user              | 0             | 1 (<0.1%)     | 1 (<0.1%)     |
| Tattoo                     | 2 ( 0.1%)     | 2 ( 0.1%)     | 4 ( 0.1%)     |
| Tobacco user               | 1 (<0.1%)     | 0             | 1 (<0.1%)     |

**Table 14.3.1 / 4: Number of subjects with baseline findings or medical history by MedDRA SOC/PT (FAS)**

| Primary system organ class<br>Preferred term<br>MedDRA version 14.0 | LCS12<br>N=1432 (100%) | LCS16<br>N=1452 (100%) | Total<br>N=2884 (100%) |
|---------------------------------------------------------------------|------------------------|------------------------|------------------------|
| Surgical and medical procedures                                     | 620 ( 43.3%)           | 581 ( 40.0%)           | 1201 ( 41.6%)          |
| Abdominal hernia repair                                             | 2 ( 0.1%)              | 0                      | 2 ( <0.1%)             |
| Abdominoplasty                                                      | 9 ( 0.6%)              | 1 ( <0.1%)             | 10 ( 0.3%)             |
| Abortion induced                                                    | 18 ( 1.3%)             | 20 ( 1.4%)             | 38 ( 1.3%)             |
| Abscess drainage                                                    | 1 ( <0.1%)             | 2 ( 0.1%)              | 3 ( 0.1%)              |
| Acrochordon excision                                                | 1 ( <0.1%)             | 0                      | 1 ( <0.1%)             |
| Adenoidectomy                                                       | 36 ( 2.5%)             | 21 ( 1.4%)             | 57 ( 2.0%)             |
| Adenotonsillectomy                                                  | 4 ( 0.3%)              | 18 ( 1.2%)             | 22 ( 0.8%)             |
| Adhesiolysis                                                        | 2 ( 0.1%)              | 0                      | 2 ( <0.1%)             |
| Anal fissure excision                                               | 1 ( <0.1%)             | 0                      | 1 ( <0.1%)             |
| Anal fistula excision                                               | 1 ( <0.1%)             | 0                      | 1 ( <0.1%)             |
| Ankle operation                                                     | 5 ( 0.3%)              | 2 ( 0.1%)              | 7 ( 0.2%)              |
| Antibiotic prophylaxis                                              | 0                      | 1 ( <0.1%)             | 1 ( <0.1%)             |
| Antiviral prophylaxis                                               | 0                      | 1 ( <0.1%)             | 1 ( <0.1%)             |
| Appendectomy                                                        | 84 ( 5.9%)             | 61 ( 4.2%)             | 145 ( 5.0%)            |
| Bartholin's cyst removal                                            | 1 ( <0.1%)             | 1 ( <0.1%)             | 2 ( <0.1%)             |
| Benign tumour excision                                              | 0                      | 3 ( 0.2%)              | 3 ( 0.1%)              |
| Bladder irrigation                                                  | 1 ( <0.1%)             | 0                      | 1 ( <0.1%)             |
| Bladder repair                                                      | 1 ( <0.1%)             | 0                      | 1 ( <0.1%)             |
| Bone cyst excision                                                  | 1 ( <0.1%)             | 0                      | 1 ( <0.1%)             |
| Bone graft                                                          | 1 ( <0.1%)             | 0                      | 1 ( <0.1%)             |
| Bone lesion excision                                                | 0                      | 2 ( 0.1%)              | 2 ( <0.1%)             |
| Bone operation                                                      | 1 ( <0.1%)             | 2 ( 0.1%)              | 3 ( 0.1%)              |
| Breast cyst drainage                                                | 0                      | 1 ( <0.1%)             | 1 ( <0.1%)             |
| Breast cyst excision                                                | 4 ( 0.3%)              | 2 ( 0.1%)              | 6 ( 0.2%)              |
| Breast lump removal                                                 | 3 ( 0.2%)              | 1 ( <0.1%)             | 4 ( 0.1%)              |
| Breast prosthesis implantation                                      | 17 ( 1.2%)             | 21 ( 1.4%)             | 38 ( 1.3%)             |
| Breast prosthesis removal                                           | 1 ( <0.1%)             | 0                      | 1 ( <0.1%)             |
| Breast reconstruction                                               | 1 ( <0.1%)             | 0                      | 1 ( <0.1%)             |
| Bunion operation                                                    | 6 ( 0.4%)              | 2 ( 0.1%)              | 8 ( 0.3%)              |
| Caesarean section                                                   | 187 ( 13.1%)           | 158 ( 10.9%)           | 345 ( 12.0%)           |
| Cardiac ablation                                                    | 0                      | 1 ( <0.1%)             | 1 ( <0.1%)             |
| Cardiac pacemaker insertion                                         | 0                      | 1 ( <0.1%)             | 1 ( <0.1%)             |
| Carpal tunnel decompression                                         | 1 ( <0.1%)             | 0                      | 1 ( <0.1%)             |
| Cataract operation                                                  | 0                      | 1 ( <0.1%)             | 1 ( <0.1%)             |
| Cautery to nose                                                     | 1 ( <0.1%)             | 1 ( <0.1%)             | 2 ( <0.1%)             |
| Cervical conisation                                                 | 3 ( 0.2%)              | 3 ( 0.2%)              | 6 ( 0.2%)              |
| Cervical laser therapy                                              | 2 ( 0.1%)              | 2 ( 0.1%)              | 4 ( 0.1%)              |
| Cervix cautery                                                      | 4 ( 0.3%)              | 6 ( 0.4%)              | 10 ( 0.3%)             |
| Cervix cerclage procedure                                           | 2 ( 0.1%)              | 1 ( <0.1%)             | 3 ( 0.1%)              |
| Cervix operation                                                    | 0                      | 2 ( 0.1%)              | 2 ( <0.1%)             |
| Cholecystectomy                                                     | 33 ( 2.3%)             | 37 ( 2.5%)             | 70 ( 2.4%)             |
| Cholelithotomy                                                      | 1 ( <0.1%)             | 0                      | 1 ( <0.1%)             |
| Contraception                                                       | 1 ( <0.1%)             | 0                      | 1 ( <0.1%)             |



**Table 14.3.1 / 4: Number of subjects with baseline findings or medical history by MedDRA SOC/PT (FAS)**

| Primary system organ class<br>Preferred term<br>MedDRA version 14.0 | LCS12<br>N=1432 (100%) | LCS16<br>N=1452 (100%) | Total<br>N=2884 (100%) |
|---------------------------------------------------------------------|------------------------|------------------------|------------------------|
| Cranioplasty                                                        | 0                      | 1 ( <0.1%)             | 1 ( <0.1%)             |
| Cryotherapy                                                         | 2 ( 0.1%)              | 5 ( 0.3%)              | 7 ( 0.2%)              |
| Cyst drainage                                                       | 1 ( <0.1%)             | 0                      | 1 ( <0.1%)             |
| Cyst removal                                                        | 7 ( 0.5%)              | 4 ( 0.3%)              | 11 ( 0.4%)             |
| Dental care                                                         | 0                      | 1 ( <0.1%)             | 1 ( <0.1%)             |
| Dental operation                                                    | 2 ( 0.1%)              | 2 ( 0.1%)              | 4 ( 0.1%)              |
| Ear operation                                                       | 1 ( <0.1%)             | 1 ( <0.1%)             | 2 ( <0.1%)             |
| Ear tube insertion                                                  | 7 ( 0.5%)              | 5 ( 0.3%)              | 12 ( 0.4%)             |
| Ear tube removal                                                    | 1 ( <0.1%)             | 0                      | 1 ( <0.1%)             |
| Elbow operation                                                     | 1 ( <0.1%)             | 1 ( <0.1%)             | 2 ( <0.1%)             |
| Endocervical curettage                                              | 1 ( <0.1%)             | 4 ( 0.3%)              | 5 ( 0.2%)              |
| Endodontic procedure                                                | 1 ( <0.1%)             | 2 ( 0.1%)              | 3 ( 0.1%)              |
| Endometriosis ablation                                              | 1 ( <0.1%)             | 4 ( 0.3%)              | 5 ( 0.2%)              |
| Epiphyseal stapling                                                 | 1 ( <0.1%)             | 0                      | 1 ( <0.1%)             |
| Evacuation of retained products of conception                       | 1 ( <0.1%)             | 1 ( <0.1%)             | 2 ( <0.1%)             |
| Exploratory operation                                               | 1 ( <0.1%)             | 0                      | 1 ( <0.1%)             |
| Eye laser surgery                                                   | 1 ( <0.1%)             | 1 ( <0.1%)             | 2 ( <0.1%)             |
| Eye muscle operation                                                | 0                      | 3 ( 0.2%)              | 3 ( 0.1%)              |
| Eye operation                                                       | 5 ( 0.3%)              | 3 ( 0.2%)              | 8 ( 0.3%)              |
| Eyeglasses therapy                                                  | 0                      | 1 ( <0.1%)             | 1 ( <0.1%)             |
| Foot operation                                                      | 1 ( <0.1%)             | 3 ( 0.2%)              | 4 ( 0.1%)              |
| Gallbladder operation                                               | 1 ( <0.1%)             | 2 ( 0.1%)              | 3 ( 0.1%)              |
| Gastric banding                                                     | 0                      | 1 ( <0.1%)             | 1 ( <0.1%)             |
| Gastric bypass                                                      | 0                      | 5 ( 0.3%)              | 5 ( 0.2%)              |
| Genital labial operation                                            | 1 ( <0.1%)             | 0                      | 1 ( <0.1%)             |
| Gingival graft                                                      | 1 ( <0.1%)             | 0                      | 1 ( <0.1%)             |
| Gingival operation                                                  | 0                      | 1 ( <0.1%)             | 1 ( <0.1%)             |
| Gingivectomy                                                        | 1 ( <0.1%)             | 0                      | 1 ( <0.1%)             |
| Haemorrhoid operation                                               | 2 ( 0.1%)              | 1 ( <0.1%)             | 3 ( 0.1%)              |
| Hernia repair                                                       | 0                      | 2 ( 0.1%)              | 2 ( <0.1%)             |
| Hymenectomy                                                         | 2 ( 0.1%)              | 1 ( <0.1%)             | 3 ( 0.1%)              |
| Ileal operation                                                     | 0                      | 1 ( <0.1%)             | 1 ( <0.1%)             |
| Immunisation                                                        | 1 ( <0.1%)             | 0                      | 1 ( <0.1%)             |
| In vitro fertilisation                                              | 2 ( 0.1%)              | 3 ( 0.2%)              | 5 ( 0.2%)              |
| Inguinal hernia repair                                              | 8 ( 0.6%)              | 11 ( 0.8%)             | 19 ( 0.7%)             |
| Intervertebral disc operation                                       | 2 ( 0.1%)              | 4 ( 0.3%)              | 6 ( 0.2%)              |
| Intra-uterine contraceptive device                                  | 1 ( <0.1%)             | 0                      | 1 ( <0.1%)             |
| Jaw operation                                                       | 6 ( 0.4%)              | 5 ( 0.3%)              | 11 ( 0.4%)             |
| Joint dislocation reduction                                         | 1 ( <0.1%)             | 0                      | 1 ( <0.1%)             |
| Joint injection                                                     | 0                      | 1 ( <0.1%)             | 1 ( <0.1%)             |
| Keratomileusis                                                      | 3 ( 0.2%)              | 3 ( 0.2%)              | 6 ( 0.2%)              |
| Knee operation                                                      | 7 ( 0.5%)              | 12 ( 0.8%)             | 19 ( 0.7%)             |
| Laser therapy                                                       | 1 ( <0.1%)             | 0                      | 1 ( <0.1%)             |
| Ligament operation                                                  | 6 ( 0.4%)              | 9 ( 0.6%)              | 15 ( 0.5%)             |

**Table 14.3.1 / 4: Number of subjects with baseline findings or medical history by MedDRA SOC/PT (FAS)**

| Primary system organ class<br>Preferred term<br>MedDRA version 14.0 | LCS12<br>N=1432 (100%) | LCS16<br>N=1452 (100%) | Total<br>N=2884 (100%) |
|---------------------------------------------------------------------|------------------------|------------------------|------------------------|
| Limb operation                                                      | 4 ( 0.3%)              | 4 ( 0.3%)              | 8 ( 0.3%)              |
| Lipoma excision                                                     | 2 ( 0.1%)              | 0                      | 2 (<0.1%)              |
| Liposuction                                                         | 8 ( 0.6%)              | 4 ( 0.3%)              | 12 ( 0.4%)             |
| Lithotripsy                                                         | 1 (<0.1%)              | 0                      | 1 (<0.1%)              |
| Loop electrosurgical excision procedure                             | 19 ( 1.3%)             | 17 ( 1.2%)             | 36 ( 1.2%)             |
| Lymphadenectomy                                                     | 1 (<0.1%)              | 1 (<0.1%)              | 2 (<0.1%)              |
| Lymphoid tissue operation                                           | 0                      | 1 (<0.1%)              | 1 (<0.1%)              |
| Mammoplasty                                                         | 31 ( 2.2%)             | 44 ( 3.0%)             | 75 ( 2.6%)             |
| Mastoidectomy                                                       | 1 (<0.1%)              | 0                      | 1 (<0.1%)              |
| Maxillofacial operation                                             | 1 (<0.1%)              | 0                      | 1 (<0.1%)              |
| Medical device removal                                              | 0                      | 1 (<0.1%)              | 1 (<0.1%)              |
| Meniscus operation                                                  | 2 ( 0.1%)              | 0                      | 2 (<0.1%)              |
| Meniscus removal                                                    | 2 ( 0.1%)              | 2 ( 0.1%)              | 4 ( 0.1%)              |
| Mole excision                                                       | 5 ( 0.3%)              | 3 ( 0.2%)              | 8 ( 0.3%)              |
| Myomectomy                                                          | 0                      | 2 ( 0.1%)              | 2 (<0.1%)              |
| Myringotomy                                                         | 3 ( 0.2%)              | 2 ( 0.1%)              | 5 ( 0.2%)              |
| Nasal operation                                                     | 4 ( 0.3%)              | 0                      | 4 ( 0.1%)              |
| Nasal polypectomy                                                   | 1 (<0.1%)              | 1 (<0.1%)              | 2 (<0.1%)              |
| Nasal septal operation                                              | 4 ( 0.3%)              | 1 (<0.1%)              | 5 ( 0.2%)              |
| Obesity surgery                                                     | 1 (<0.1%)              | 0                      | 1 (<0.1%)              |
| Oophorectomy                                                        | 0                      | 1 (<0.1%)              | 1 (<0.1%)              |
| Oral contraception                                                  | 0                      | 1 (<0.1%)              | 1 (<0.1%)              |
| Oral surgery                                                        | 3 ( 0.2%)              | 0                      | 3 ( 0.1%)              |
| Ostectomy                                                           | 1 (<0.1%)              | 0                      | 1 (<0.1%)              |
| Osteosynthesis                                                      | 2 ( 0.1%)              | 2 ( 0.1%)              | 4 ( 0.1%)              |
| Osteotomy                                                           | 2 ( 0.1%)              | 0                      | 2 (<0.1%)              |
| Otoplasty                                                           | 1 (<0.1%)              | 0                      | 1 (<0.1%)              |
| Ovarian cystectomy                                                  | 11 ( 0.8%)             | 10 ( 0.7%)             | 21 ( 0.7%)             |
| Ovarian operation                                                   | 2 ( 0.1%)              | 0                      | 2 (<0.1%)              |
| Periodontal operation                                               | 0                      | 1 (<0.1%)              | 1 (<0.1%)              |
| Peripheral nerve operation                                          | 0                      | 1 (<0.1%)              | 1 (<0.1%)              |
| Pilonidal sinus repair                                              | 0                      | 3 ( 0.2%)              | 3 ( 0.1%)              |
| Plastic surgery to the face                                         | 1 (<0.1%)              | 0                      | 1 (<0.1%)              |
| Polypectomy                                                         | 0                      | 1 (<0.1%)              | 1 (<0.1%)              |
| Proctocolectomy                                                     | 1 (<0.1%)              | 0                      | 1 (<0.1%)              |
| Prophylaxis                                                         | 1 (<0.1%)              | 0                      | 1 (<0.1%)              |
| Pterygium operation                                                 | 1 (<0.1%)              | 0                      | 1 (<0.1%)              |
| Radioactive iodine therapy                                          | 1 (<0.1%)              | 0                      | 1 (<0.1%)              |
| Removal of internal fixation                                        | 1 (<0.1%)              | 0                      | 1 (<0.1%)              |
| Rhinoplasty                                                         | 6 ( 0.4%)              | 6 ( 0.4%)              | 12 ( 0.4%)             |
| Rib excision                                                        | 1 (<0.1%)              | 0                      | 1 (<0.1%)              |
| Salivary gland resection                                            | 1 (<0.1%)              | 0                      | 1 (<0.1%)              |
| Salpingectomy                                                       | 0                      | 1 (<0.1%)              | 1 (<0.1%)              |
| Salpingo-oophorectomy unilateral                                    | 0                      | 1 (<0.1%)              | 1 (<0.1%)              |

**Table 14.3.1 / 4: Number of subjects with baseline findings or medical history by MedDRA SOC/PT (FAS)**

| Primary system organ class<br>Preferred term<br>MedDRA version 14.0 | LCS12<br>N=1432 (100%) | LCS16<br>N=1452 (100%) | Total<br>N=2884 (100%) |
|---------------------------------------------------------------------|------------------------|------------------------|------------------------|
| Scar excision                                                       | 2 ( 0.1%)              | 1 (<0.1%)              | 3 ( 0.1%)              |
| Scoliosis surgery                                                   | 1 (<0.1%)              | 2 ( 0.1%)              | 3 ( 0.1%)              |
| Sebaceous cyst excision                                             | 1 (<0.1%)              | 0                      | 1 (<0.1%)              |
| Shoulder operation                                                  | 3 ( 0.2%)              | 3 ( 0.2%)              | 6 ( 0.2%)              |
| Sinus operation                                                     | 2 ( 0.1%)              | 3 ( 0.2%)              | 5 ( 0.2%)              |
| Skin graft                                                          | 2 ( 0.1%)              | 2 ( 0.1%)              | 4 ( 0.1%)              |
| Skin neoplasm excision                                              | 0                      | 1 (<0.1%)              | 1 (<0.1%)              |
| Skin operation                                                      | 1 (<0.1%)              | 0                      | 1 (<0.1%)              |
| Small intestinal resection                                          | 0                      | 1 (<0.1%)              | 1 (<0.1%)              |
| Splenectomy                                                         | 1 (<0.1%)              | 0                      | 1 (<0.1%)              |
| Strabismus correction                                               | 4 ( 0.3%)              | 5 ( 0.3%)              | 9 ( 0.3%)              |
| Surgery                                                             | 1 (<0.1%)              | 1 (<0.1%)              | 2 (<0.1%)              |
| Synovectomy                                                         | 1 (<0.1%)              | 0                      | 1 (<0.1%)              |
| Tendon operation                                                    | 1 (<0.1%)              | 2 ( 0.1%)              | 3 ( 0.1%)              |
| Tendon sheath incision                                              | 1 (<0.1%)              | 0                      | 1 (<0.1%)              |
| Tendon sheath lesion excision                                       | 2 ( 0.1%)              | 4 ( 0.3%)              | 6 ( 0.2%)              |
| Therapeutic procedure                                               | 0                      | 1 (<0.1%)              | 1 (<0.1%)              |
| Thymectomy                                                          | 0                      | 1 (<0.1%)              | 1 (<0.1%)              |
| Thyroid adenoma removal                                             | 1 (<0.1%)              | 0                      | 1 (<0.1%)              |
| Thyroidectomy                                                       | 2 ( 0.1%)              | 5 ( 0.3%)              | 7 ( 0.2%)              |
| Toe amputation                                                      | 0                      | 1 (<0.1%)              | 1 (<0.1%)              |
| Toe operation                                                       | 2 ( 0.1%)              | 1 (<0.1%)              | 3 ( 0.1%)              |
| Tongue tie operation                                                | 0                      | 1 (<0.1%)              | 1 (<0.1%)              |
| Tonsillectomy                                                       | 128 ( 8.9%)            | 89 ( 6.1%)             | 217 ( 7.5%)            |
| Tooth extraction                                                    | 7 ( 0.5%)              | 5 ( 0.3%)              | 12 ( 0.4%)             |
| Transfusion                                                         | 0                      | 1 (<0.1%)              | 1 (<0.1%)              |
| Tympanoplasty                                                       | 2 ( 0.1%)              | 3 ( 0.2%)              | 5 ( 0.2%)              |
| Umbilical hernia repair                                             | 5 ( 0.3%)              | 2 ( 0.1%)              | 7 ( 0.2%)              |
| Urethral dilation procedure                                         | 0                      | 1 (<0.1%)              | 1 (<0.1%)              |
| Uterine dilation and curettage                                      | 19 ( 1.3%)             | 25 ( 1.7%)             | 44 ( 1.5%)             |
| Uterine dilation and evacuation                                     | 3 ( 0.2%)              | 3 ( 0.2%)              | 6 ( 0.2%)              |
| Uterine operation                                                   | 0                      | 2 ( 0.1%)              | 2 (<0.1%)              |
| Uterine polypectomy                                                 | 2 ( 0.1%)              | 3 ( 0.2%)              | 5 ( 0.2%)              |
| Uvullectomy                                                         | 1 (<0.1%)              | 0                      | 1 (<0.1%)              |
| Vaginal cyst excision                                               | 1 (<0.1%)              | 0                      | 1 (<0.1%)              |
| Vaginal operation                                                   | 0                      | 1 (<0.1%)              | 1 (<0.1%)              |
| Varicose vein operation                                             | 3 ( 0.2%)              | 6 ( 0.4%)              | 9 ( 0.3%)              |
| Vulval warts removal                                                | 3 ( 0.2%)              | 2 ( 0.1%)              | 5 ( 0.2%)              |
| Vulvectomy                                                          | 0                      | 1 (<0.1%)              | 1 (<0.1%)              |
| Wart excision                                                       | 6 ( 0.4%)              | 5 ( 0.3%)              | 11 ( 0.4%)             |
| Wisdom teeth removal                                                | 55 ( 3.8%)             | 52 ( 3.6%)             | 107 ( 3.7%)            |
| Wrist surgery                                                       | 1 (<0.1%)              | 1 (<0.1%)              | 2 (<0.1%)              |

**Table 14.3.1 / 4: Number of subjects with baseline findings or medical history by MedDRA SOC/PT (FAS)**

| Primary system organ class<br>Preferred term<br>MedDRA version 14.0 | LCS12<br>N=1432 (100%) | LCS16<br>N=1452 (100%) | Total<br>N=2884 (100%) |
|---------------------------------------------------------------------|------------------------|------------------------|------------------------|
| Vascular disorders                                                  | 26 ( 1.8%)             | 29 ( 2.0%)             | 55 ( 1.9%)             |
| Aortic stenosis                                                     | 0                      | 1 (<0.1%)              | 1 (<0.1%)              |
| Hot flush                                                           | 0                      | 2 ( 0.1%)              | 2 (<0.1%)              |
| Hypertension                                                        | 17 ( 1.2%)             | 15 ( 1.0%)             | 32 ( 1.1%)             |
| Hypotension                                                         | 2 ( 0.1%)              | 4 ( 0.3%)              | 6 ( 0.2%)              |
| Kawasaki's disease                                                  | 0                      | 1 (<0.1%)              | 1 (<0.1%)              |
| Lymphoedema                                                         | 1 (<0.1%)              | 0                      | 1 (<0.1%)              |
| Orthostatic hypotension                                             | 0                      | 1 (<0.1%)              | 1 (<0.1%)              |
| Peripheral vascular disorder                                        | 0                      | 1 (<0.1%)              | 1 (<0.1%)              |
| Raynaud's phenomenon                                                | 0                      | 1 (<0.1%)              | 1 (<0.1%)              |
| Varicose vein                                                       | 6 ( 0.4%)              | 3 ( 0.2%)              | 9 ( 0.3%)              |
| Vein pain                                                           | 0                      | 1 (<0.1%)              | 1 (<0.1%)              |

Note: All events recorded as medical history or as baseline finding are shown in this table.

Global Biostatistics: /by-sasp/patdb/projects/de04209/310442/stat/prod\_interim03/pgms/t-basfin.sas epkl 12OCT2011 11:19

End of table

**Table 14.3.1 / 5: Overall summary of number of subjects with adverse events by treatment in 1st year (FAS)**

|                                                       | LCS12<br>N=1432 (100%) | LCS16<br>N=1452 (100%) | Total<br>N=2884 (100%) |
|-------------------------------------------------------|------------------------|------------------------|------------------------|
| Number of subjects (%) with:                          |                        |                        |                        |
| Any AE                                                | 1035 ( 72.3%)          | 1068 ( 73.6%)          | 2103 ( 72.9%)          |
| Any study drug related AE                             | 591 ( 41.3%)           | 596 ( 41.0%)           | 1187 ( 41.2%)          |
| Any AE related to procedures required by the protocol | 180 ( 12.6%)           | 186 ( 12.8%)           | 366 ( 12.7%)           |
| Maximum intensity for any AE                          |                        |                        |                        |
| mild                                                  | 326 ( 22.8%)           | 378 ( 26.0%)           | 704 ( 24.4%)           |
| moderate                                              | 521 ( 36.4%)           | 524 ( 36.1%)           | 1045 ( 36.2%)          |
| severe                                                | 187 ( 13.1%)           | 161 ( 11.1%)           | 348 ( 12.1%)           |
| Maximum intensity for study drug related AEs          |                        |                        |                        |
| mild                                                  | 228 ( 15.9%)           | 254 ( 17.5%)           | 482 ( 16.7%)           |
| moderate                                              | 275 ( 19.2%)           | 258 ( 17.8%)           | 533 ( 18.5%)           |
| severe                                                | 85 ( 5.9%)             | 84 ( 5.8%)             | 169 ( 5.9%)            |
| AE-related Deaths                                     | 0                      | 0                      | 0                      |
| Any SAEs                                              | 35 ( 2.4%)             | 27 ( 1.9%)             | 62 ( 2.1%)             |
| Study drug related SAEs                               | 6 ( 0.4%)              | 7 ( 0.5%)              | 13 ( 0.5%)             |
| SAEs related to procedures required by the protocol   | 2 ( 0.1%)              | 4 ( 0.3%)              | 6 ( 0.2%)              |
| Discontinuation of study drug due to AEs              | 233 ( 16.3%)           | 207 ( 14.3%)           | 440 ( 15.3%)           |
| Discontinuation of study drug due to SAEs             | 9 ( 0.6%)              | 7 ( 0.5%)              | 16 ( 0.6%)             |

Note: Missing, possible, probable and definite for drug relationship is counted as drug-related.

Note: Denominator is number of subjects available at the START of the year or all subjects for overall

Global Biostatistics: /by-sasp/patdb/projects/de04209/310442/stat/prod\_interim03/pgms/t-ae-cat-summary.sas epkll 12OCT2011 11:20

End of table

**Table 14.3.1 / 6: Overall summary of number of subjects with adverse events by treatment in 2nd year (FAS)**

|                                                       | LCS12<br>N=1166 (100%) | LCS16<br>N=1206 (100%) | Total<br>N=2372 (100%) |
|-------------------------------------------------------|------------------------|------------------------|------------------------|
| Number of subjects (%) with:                          |                        |                        |                        |
| Any AE                                                | 603 ( 51.7%)           | 670 ( 55.6%)           | 1273 ( 53.7%)          |
| Any study drug related AE                             | 166 ( 14.2%)           | 200 ( 16.6%)           | 366 ( 15.4%)           |
| Any AE related to procedures required by the protocol | 27 ( 2.3%)             | 37 ( 3.1%)             | 64 ( 2.7%)             |
| Maximum intensity for any AE                          |                        |                        |                        |
| mild                                                  | 257 ( 22.0%)           | 286 ( 23.7%)           | 543 ( 22.9%)           |
| moderate                                              | 284 ( 24.4%)           | 300 ( 24.9%)           | 584 ( 24.6%)           |
| severe                                                | 61 ( 5.2%)             | 81 ( 6.7%)             | 142 ( 6.0%)            |
| Maximum intensity for study drug related AEs          |                        |                        |                        |
| mild                                                  | 82 ( 7.0%)             | 105 ( 8.7%)            | 187 ( 7.9%)            |
| moderate                                              | 64 ( 5.5%)             | 73 ( 6.1%)             | 137 ( 5.8%)            |
| severe                                                | 20 ( 1.7%)             | 21 ( 1.7%)             | 41 ( 1.7%)             |
| AE-related Deaths                                     | 0                      | 0                      | 0                      |
| Any SAEs                                              | 19 ( 1.6%)             | 22 ( 1.8%)             | 41 ( 1.7%)             |
| Study drug related SAEs                               | 2 ( 0.2%)              | 5 ( 0.4%)              | 7 ( 0.3%)              |
| SAEs related to procedures required by the protocol   | 0                      | 2 ( 0.2%)              | 2 ( <0.1%)             |
| Discontinuation of study drug due to AEs              | 56 ( 4.8%)             | 56 ( 4.6%)             | 112 ( 4.7%)            |
| Discontinuation of study drug due to SAEs             | 2 ( 0.2%)              | 5 ( 0.4%)              | 7 ( 0.3%)              |

Note: Missing, possible, probable and definite for drug relationship is counted as drug-related.

Note: Denominator is number of subjects available at the START of the year or all subjects for overall

Global Biostatistics: /by-sasp/patdb/projects/de04209/310442/stat/prod\_interim03/pgms/t-ae-cat-summary.sas epkll 12OCT2011 11:20

End of table

**Table 14.3.1 / 7: Overall summary of number of subjects with adverse events by treatment in 3rd year (FAS)**

|                                                       | LCS12<br>N=963 (100%) | LCS16<br>N=1012 (100%) | Total<br>N=1975 (100%) |
|-------------------------------------------------------|-----------------------|------------------------|------------------------|
| Number of subjects (%) with:                          |                       |                        |                        |
| Any AE                                                | 466 ( 48.4%)          | 535 ( 52.9%)           | 1001 ( 50.7%)          |
| Any study drug related AE                             | 104 ( 10.8%)          | 141 ( 13.9%)           | 245 ( 12.4%)           |
| Any AE related to procedures required by the protocol | 49 ( 5.1%)            | 50 ( 4.9%)             | 99 ( 5.0%)             |
| Maximum intensity for any AE                          |                       |                        |                        |
| mild                                                  | 211 ( 21.9%)          | 228 ( 22.5%)           | 439 ( 22.2%)           |
| moderate                                              | 195 ( 20.2%)          | 239 ( 23.6%)           | 434 ( 22.0%)           |
| severe                                                | 50 ( 5.2%)            | 53 ( 5.2%)             | 103 ( 5.2%)            |
| Maximum intensity for study drug related AEs          |                       |                        |                        |
| mild                                                  | 54 ( 5.6%)            | 80 ( 7.9%)             | 134 ( 6.8%)            |
| moderate                                              | 37 ( 3.8%)            | 49 ( 4.8%)             | 86 ( 4.4%)             |
| severe                                                | 11 ( 1.1%)            | 11 ( 1.1%)             | 22 ( 1.1%)             |
| AE-related Deaths                                     | 0                     | 0                      | 0                      |
| Any SAEs                                              | 18 ( 1.9%)            | 23 ( 2.3%)             | 41 ( 2.1%)             |
| Study drug related SAEs                               | 1 ( 0.1%)             | 3 ( 0.3%)              | 4 ( 0.2%)              |
| SAEs related to procedures required by the protocol   | 0                     | 0                      | 0                      |
| Discontinuation of study drug due to AEs              | 32 ( 3.3%)            | 33 ( 3.3%)             | 65 ( 3.3%)             |
| Discontinuation of study drug due to SAEs             | 3 ( 0.3%)             | 6 ( 0.6%)              | 9 ( 0.5%)              |

Note: Missing, possible, probable and definite for drug relationship is counted as drug-related.

Note: Denominator is number of subjects available at the START of the year or all subjects for overall

Global Biostatistics: /by-sasp/patdb/projects/de04209/310442/stat/prod\_interim03/pgms/t-ae-cat-summary.sas epkll 12OCT2011 11:20

End of table

**Table 14.3.1 / 8: Overall summary of number of subjects with adverse events by treatment overall (FAS)**

|                                                       | LCS12<br>N=1432 (100%) | LCS16<br>N=1452 (100%) | Total<br>N=2884 (100%) |
|-------------------------------------------------------|------------------------|------------------------|------------------------|
| Number of subjects (%) with:                          |                        |                        |                        |
| Any AE                                                | 1194 ( 83.4%)          | 1246 ( 85.8%)          | 2440 ( 84.6%)          |
| Any study drug related AE                             | 710 ( 49.6%)           | 756 ( 52.1%)           | 1466 ( 50.8%)          |
| Any AE related to procedures required by the protocol | 241 ( 16.8%)           | 260 ( 17.9%)           | 501 ( 17.4%)           |
| Maximum intensity for any AE                          |                        |                        |                        |
| mild                                                  | 313 ( 21.9%)           | 353 ( 24.3%)           | 666 ( 23.1%)           |
| moderate                                              | 616 ( 43.0%)           | 633 ( 43.6%)           | 1249 ( 43.3%)          |
| severe                                                | 261 ( 18.2%)           | 250 ( 17.2%)           | 511 ( 17.7%)           |
| Maximum intensity for study drug related AEs          |                        |                        |                        |
| mild                                                  | 261 ( 18.2%)           | 315 ( 21.7%)           | 576 ( 20.0%)           |
| moderate                                              | 333 ( 23.3%)           | 334 ( 23.0%)           | 667 ( 23.1%)           |
| severe                                                | 112 ( 7.8%)            | 106 ( 7.3%)            | 218 ( 7.6%)            |
| AE-related Deaths                                     | 0                      | 0                      | 0                      |
| Any SAEs                                              | 66 ( 4.6%)             | 71 ( 4.9%)             | 137 ( 4.8%)            |
| Study drug related SAEs                               | 8 ( 0.6%)              | 15 ( 1.0%)             | 23 ( 0.8%)             |
| SAEs related to procedures required by the protocol   | 2 ( 0.1%)              | 6 ( 0.4%)              | 8 ( 0.3%)              |
| Discontinuation of study drug due to AEs              | 319 ( 22.3%)           | 290 ( 20.0%)           | 609 ( 21.1%)           |
| Discontinuation of study drug due to SAEs             | 14 ( 1.0%)             | 18 ( 1.2%)             | 32 ( 1.1%)             |

Note: Missing, possible, probable and definite for drug relationship is counted as drug-related.

Note: Denominator is number of subjects available at the START of the year or all subjects for overall

Global Biostatistics: /by-sasp/patdb/projects/de04209/310442/stat/prod\_interim03/pgms/t-ae-cat-summary.sas epkll 12OCT2011 11:20

End of table



**Table 14.3.1 / 9: Number of subjects with adverse events by primary system organ class, preferred term and year (FAS)**

| Primary system organ class<br>Preferred term<br>MedDRA version 14.0 | YEAR OF<br>ONSET | LCS12              | LCS16              | Total              |
|---------------------------------------------------------------------|------------------|--------------------|--------------------|--------------------|
| Number of subjects (%) with at least one adverse event              | 1st year         | 1035/1432 ( 72.3%) | 1068/1452 ( 73.6%) | 2103/2884 ( 72.9%) |
|                                                                     | 2nd year         | 603/1166 ( 51.7%)  | 670/1206 ( 55.6%)  | 1273/2372 ( 53.7%) |
|                                                                     | 3rd year         | 466/ 963 ( 48.4%)  | 535/1012 ( 52.9%)  | 1001/1975 ( 50.7%) |
|                                                                     | Overall          | 1194/1432 ( 83.4%) | 1246/1452 ( 85.8%) | 2440/2884 ( 84.6%) |
| Blood and lymphatic system disorders                                | 1st year         | 10/1432 ( 0.7%)    | 3/1452 ( 0.2%)     | 13/2884 ( 0.5%)    |
|                                                                     | 2nd year         | 3/1166 ( 0.3%)     | 2/1206 ( 0.2%)     | 5/2372 ( 0.2%)     |
|                                                                     | 3rd year         | 3/ 963 ( 0.3%)     | 3/1012 ( 0.3%)     | 6/1975 ( 0.3%)     |
|                                                                     | Overall          | 16/1432 ( 1.1%)    | 8/1452 ( 0.6%)     | 24/2884 ( 0.8%)    |
| Anaemia                                                             | 1st year         | 5/1432 ( 0.3%)     | 1/1452 ( <0.1%)    | 6/2884 ( 0.2%)     |
|                                                                     | 2nd year         | 1/1166 ( <0.1%)    | 1/1206 ( <0.1%)    | 2/2372 ( <0.1%)    |
|                                                                     | 3rd year         | 1/ 963 ( 0.1%)     | 1/1012 ( <0.1%)    | 2/1975 ( 0.1%)     |
|                                                                     | Overall          | 7/1432 ( 0.5%)     | 3/1452 ( 0.2%)     | 10/2884 ( 0.3%)    |
| Iron deficiency anaemia                                             | 1st year         | 0/1432             | 1/1452 ( <0.1%)    | 1/2884 ( <0.1%)    |
|                                                                     | 3rd year         | 1/ 963 ( 0.1%)     | 0/1012             | 1/1975 ( <0.1%)    |
|                                                                     | Overall          | 1/1432 ( <0.1%)    | 1/1452 ( <0.1%)    | 2/2884 ( <0.1%)    |
| Leukocytosis                                                        | 1st year         | 1/1432 ( <0.1%)    | 0/1452             | 1/2884 ( <0.1%)    |
|                                                                     | Overall          | 1/1432 ( <0.1%)    | 0/1452             | 1/2884 ( <0.1%)    |
| Lymphadenitis                                                       | 1st year         | 2/1432 ( 0.1%)     | 0/1452             | 2/2884 ( <0.1%)    |
|                                                                     | 2nd year         | 1/1166 ( <0.1%)    | 0/1206             | 1/2372 ( <0.1%)    |
|                                                                     | Overall          | 3/1432 ( 0.2%)     | 0/1452             | 3/2884 ( 0.1%)     |
| Lymphadenopathy                                                     | 1st year         | 1/1432 ( <0.1%)    | 1/1452 ( <0.1%)    | 2/2884 ( <0.1%)    |
|                                                                     | 2nd year         | 1/1166 ( <0.1%)    | 0/1206             | 1/2372 ( <0.1%)    |
|                                                                     | 3rd year         | 1/ 963 ( 0.1%)     | 2/1012 ( 0.2%)     | 3/1975 ( 0.2%)     |
|                                                                     | Overall          | 3/1432 ( 0.2%)     | 3/1452 ( 0.2%)     | 6/2884 ( 0.2%)     |
| Pancytopenia                                                        | 2nd year         | 0/1166             | 1/1206 ( <0.1%)    | 1/2372 ( <0.1%)    |
|                                                                     | Overall          | 0/1432             | 1/1452 ( <0.1%)    | 1/2884 ( <0.1%)    |
| Spherocytic anaemia                                                 | 1st year         | 1/1432 ( <0.1%)    | 0/1452             | 1/2884 ( <0.1%)    |
|                                                                     | Overall          | 1/1432 ( <0.1%)    | 0/1452             | 1/2884 ( <0.1%)    |
| Splenic cyst                                                        | 1st year         | 1/1432 ( <0.1%)    | 0/1452             | 1/2884 ( <0.1%)    |
|                                                                     | Overall          | 1/1432 ( <0.1%)    | 0/1452             | 1/2884 ( <0.1%)    |

**Table 14.3.1 / 9: Number of subjects with adverse events by primary system organ class, preferred term and year (FAS)**

| Primary system organ class<br>Preferred term<br>MedDRA version 14.0 | YEAR OF<br>ONSET | YEAR OF         |                 | Total           |
|---------------------------------------------------------------------|------------------|-----------------|-----------------|-----------------|
|                                                                     |                  | LCS12           | LCS16           |                 |
| Splenomegaly                                                        | 1st year         | 1/1432 ( <0.1%) | 0/1452          | 1/2884 ( <0.1%) |
|                                                                     | Overall          | 1/1432 ( <0.1%) | 0/1452          | 1/2884 ( <0.1%) |
| Cardiac disorders                                                   | 1st year         | 2/1432 ( 0.1%)  | 8/1452 ( 0.6%)  | 10/2884 ( 0.3%) |
|                                                                     | 2nd year         | 4/1166 ( 0.3%)  | 4/1206 ( 0.3%)  | 8/2372 ( 0.3%)  |
|                                                                     | 3rd year         | 3/ 963 ( 0.3%)  | 3/1012 ( 0.3%)  | 6/1975 ( 0.3%)  |
|                                                                     | Overall          | 9/1432 ( 0.6%)  | 14/1452 ( 1.0%) | 23/2884 ( 0.8%) |
| Arrhythmia                                                          | 1st year         | 1/1432 ( <0.1%) | 2/1452 ( 0.1%)  | 3/2884 ( 0.1%)  |
|                                                                     | Overall          | 1/1432 ( <0.1%) | 2/1452 ( 0.1%)  | 3/2884 ( 0.1%)  |
| Extrasystoles                                                       | 1st year         | 0/1432          | 1/1452 ( <0.1%) | 1/2884 ( <0.1%) |
|                                                                     | 3rd year         | 0/ 963          | 1/1012 ( <0.1%) | 1/1975 ( <0.1%) |
|                                                                     | Overall          | 0/1432          | 2/1452 ( 0.1%)  | 2/2884 ( <0.1%) |
| Mitral valve prolapse                                               | 1st year         | 0/1432          | 1/1452 ( <0.1%) | 1/2884 ( <0.1%) |
|                                                                     | 2nd year         | 0/1166          | 1/1206 ( <0.1%) | 1/2372 ( <0.1%) |
|                                                                     | Overall          | 0/1432          | 2/1452 ( 0.1%)  | 2/2884 ( <0.1%) |
| Palpitations                                                        | 1st year         | 0/1432          | 2/1452 ( 0.1%)  | 2/2884 ( <0.1%) |
|                                                                     | 2nd year         | 1/1166 ( <0.1%) | 3/1206 ( 0.2%)  | 4/2372 ( 0.2%)  |
|                                                                     | 3rd year         | 3/ 963 ( 0.3%)  | 1/1012 ( <0.1%) | 4/1975 ( 0.2%)  |
|                                                                     | Overall          | 4/1432 ( 0.3%)  | 6/1452 ( 0.4%)  | 10/2884 ( 0.3%) |
| Sinus tachycardia                                                   | 1st year         | 0/1432          | 1/1452 ( <0.1%) | 1/2884 ( <0.1%) |
|                                                                     | Overall          | 0/1432          | 1/1452 ( <0.1%) | 1/2884 ( <0.1%) |
| Tachycardia                                                         | 1st year         | 1/1432 ( <0.1%) | 2/1452 ( 0.1%)  | 3/2884 ( 0.1%)  |
|                                                                     | 2nd year         | 3/1166 ( 0.3%)  | 0/1206          | 3/2372 ( 0.1%)  |
|                                                                     | Overall          | 4/1432 ( 0.3%)  | 2/1452 ( 0.1%)  | 6/2884 ( 0.2%)  |
| Ventricular extrasystoles                                           | 3rd year         | 0/ 963          | 1/1012 ( <0.1%) | 1/1975 ( <0.1%) |
|                                                                     | Overall          | 0/1432          | 1/1452 ( <0.1%) | 1/2884 ( <0.1%) |
| Congenital, familial and genetic disorders                          | 1st year         | 0/1432          | 1/1452 ( <0.1%) | 1/2884 ( <0.1%) |
|                                                                     | 2nd year         | 3/1166 ( 0.3%)  | 0/1206          | 3/2372 ( 0.1%)  |
|                                                                     | Overall          | 3/1432 ( 0.2%)  | 1/1452 ( <0.1%) | 4/2884 ( 0.1%)  |
| Congenital hydronephrosis                                           | 2nd year         | 1/1166 ( <0.1%) | 0/1206          | 1/2372 ( <0.1%) |
|                                                                     | Overall          | 1/1432 ( <0.1%) | 0/1452          | 1/2884 ( <0.1%) |

**Table 14.3.1 / 9: Number of subjects with adverse events by primary system organ class, preferred term and year (FAS)**

| Primary system organ class<br>Preferred term<br>MedDRA version 14.0 | YEAR OF<br>ONSET | LCS12           | LCS16           | Total           |
|---------------------------------------------------------------------|------------------|-----------------|-----------------|-----------------|
| Dermoid cyst                                                        | 2nd year         | 1/1166 ( <0.1%) | 0/1206          | 1/2372 ( <0.1%) |
|                                                                     | Overall          | 1/1432 ( <0.1%) | 0/1452          | 1/2884 ( <0.1%) |
| Myotonia congenita                                                  | 1st year         | 0/1432          | 1/1452 ( <0.1%) | 1/2884 ( <0.1%) |
|                                                                     | Overall          | 0/1432          | 1/1452 ( <0.1%) | 1/2884 ( <0.1%) |
| Urethral intrinsic sphincter deficiency                             | 2nd year         | 1/1166 ( <0.1%) | 0/1206          | 1/2372 ( <0.1%) |
|                                                                     | Overall          | 1/1432 ( <0.1%) | 0/1452          | 1/2884 ( <0.1%) |
| Ear and labyrinth disorders                                         | 1st year         | 9/1432 ( 0.6%)  | 5/1452 ( 0.3%)  | 14/2884 ( 0.5%) |
|                                                                     | 2nd year         | 5/1166 ( 0.4%)  | 3/1206 ( 0.2%)  | 8/2372 ( 0.3%)  |
|                                                                     | 3rd year         | 3/ 963 ( 0.3%)  | 7/1012 ( 0.7%)  | 10/1975 ( 0.5%) |
|                                                                     | Overall          | 16/1432 ( 1.1%) | 14/1452 ( 1.0%) | 30/2884 ( 1.0%) |
| Deafness bilateral                                                  | 2nd year         | 1/1166 ( <0.1%) | 0/1206          | 1/2372 ( <0.1%) |
|                                                                     | Overall          | 1/1432 ( <0.1%) | 0/1452          | 1/2884 ( <0.1%) |
| Ear pain                                                            | 1st year         | 0/1432          | 1/1452 ( <0.1%) | 1/2884 ( <0.1%) |
|                                                                     | 3rd year         | 0/ 963          | 2/1012 ( 0.2%)  | 2/1975 ( 0.1%)  |
|                                                                     | Overall          | 0/1432          | 3/1452 ( 0.2%)  | 3/2884 ( 0.1%)  |
| Ear pruritus                                                        | 1st year         | 1/1432 ( <0.1%) | 0/1452          | 1/2884 ( <0.1%) |
|                                                                     | Overall          | 1/1432 ( <0.1%) | 0/1452          | 1/2884 ( <0.1%) |
| Meniere's disease                                                   | 3rd year         | 0/ 963          | 1/1012 ( <0.1%) | 1/1975 ( <0.1%) |
|                                                                     | Overall          | 0/1432          | 1/1452 ( <0.1%) | 1/2884 ( <0.1%) |
| Middle ear effusion                                                 | 1st year         | 0/1432          | 1/1452 ( <0.1%) | 1/2884 ( <0.1%) |
|                                                                     | 2nd year         | 0/1166          | 1/1206 ( <0.1%) | 1/2372 ( <0.1%) |
|                                                                     | Overall          | 0/1432          | 2/1452 ( 0.1%)  | 2/2884 ( <0.1%) |
| Motion sickness                                                     | 1st year         | 3/1432 ( 0.2%)  | 1/1452 ( <0.1%) | 4/2884 ( 0.1%)  |
|                                                                     | 3rd year         | 1/ 963 ( 0.1%)  | 2/1012 ( 0.2%)  | 3/1975 ( 0.2%)  |
|                                                                     | Overall          | 4/1432 ( 0.3%)  | 3/1452 ( 0.2%)  | 7/2884 ( 0.2%)  |
| Otorrhoea                                                           | 2nd year         | 0/1166          | 1/1206 ( <0.1%) | 1/2372 ( <0.1%) |
|                                                                     | 3rd year         | 1/ 963 ( 0.1%)  | 0/1012          | 1/1975 ( <0.1%) |
|                                                                     | Overall          | 1/1432 ( <0.1%) | 1/1452 ( <0.1%) | 2/2884 ( <0.1%) |

**Table 14.3.1 / 9: Number of subjects with adverse events by primary system organ class, preferred term and year (FAS)**

| Primary system organ class<br>Preferred term<br>MedDRA version 14.0 | YEAR OF<br>ONSET | LCS12           |  | LCS16           |  | Total           |
|---------------------------------------------------------------------|------------------|-----------------|--|-----------------|--|-----------------|
|                                                                     |                  |                 |  |                 |  |                 |
| Sudden hearing loss                                                 | 3rd year         | 1/ 963 ( 0.1%)  |  | 0/1012          |  | 1/1975 ( <0.1%) |
|                                                                     | Overall          | 1/1432 ( <0.1%) |  | 0/1452          |  | 1/2884 ( <0.1%) |
| Tinnitus                                                            | 2nd year         | 2/1166 ( 0.2%)  |  | 0/1206          |  | 2/2372 ( <0.1%) |
|                                                                     | Overall          | 2/1432 ( 0.1%)  |  | 0/1452          |  | 2/2884 ( <0.1%) |
| Tympanic membrane perforation                                       | 1st year         | 1/1432 ( <0.1%) |  | 0/1452          |  | 1/2884 ( <0.1%) |
|                                                                     | 2nd year         | 1/1166 ( <0.1%) |  | 0/1206          |  | 1/2372 ( <0.1%) |
|                                                                     | Overall          | 2/1432 ( 0.1%)  |  | 0/1452          |  | 2/2884 ( <0.1%) |
| Vertigo                                                             | 1st year         | 3/1432 ( 0.2%)  |  | 2/1452 ( 0.1%)  |  | 5/2884 ( 0.2%)  |
|                                                                     | 2nd year         | 1/1166 ( <0.1%) |  | 1/1206 ( <0.1%) |  | 2/2372 ( <0.1%) |
|                                                                     | 3rd year         | 0/ 963          |  | 3/1012 ( 0.3%)  |  | 3/1975 ( 0.2%)  |
|                                                                     | Overall          | 4/1432 ( 0.3%)  |  | 6/1452 ( 0.4%)  |  | 10/2884 ( 0.3%) |
| Vertigo labyrinthine                                                | 1st year         | 1/1432 ( <0.1%) |  | 0/1452          |  | 1/2884 ( <0.1%) |
|                                                                     | Overall          | 1/1432 ( <0.1%) |  | 0/1452          |  | 1/2884 ( <0.1%) |
| Vertigo positional                                                  | 1st year         | 1/1432 ( <0.1%) |  | 0/1452          |  | 1/2884 ( <0.1%) |
|                                                                     | 2nd year         | 1/1166 ( <0.1%) |  | 0/1206          |  | 1/2372 ( <0.1%) |
|                                                                     | Overall          | 2/1432 ( 0.1%)  |  | 0/1452          |  | 2/2884 ( <0.1%) |
| Endocrine disorders                                                 | 1st year         | 3/1432 ( 0.2%)  |  | 14/1452 ( 1.0%) |  | 17/2884 ( 0.6%) |
|                                                                     | 2nd year         | 5/1166 ( 0.4%)  |  | 1/1206 ( <0.1%) |  | 6/2372 ( 0.3%)  |
|                                                                     | 3rd year         | 2/ 963 ( 0.2%)  |  | 6/1012 ( 0.6%)  |  | 8/1975 ( 0.4%)  |
|                                                                     | Overall          | 10/1432 ( 0.7%) |  | 21/1452 ( 1.4%) |  | 31/2884 ( 1.1%) |
| Goitre                                                              | 1st year         | 0/1432          |  | 3/1452 ( 0.2%)  |  | 3/2884 ( 0.1%)  |
|                                                                     | 2nd year         | 1/1166 ( <0.1%) |  | 1/1206 ( <0.1%) |  | 2/2372 ( <0.1%) |
|                                                                     | 3rd year         | 1/ 963 ( 0.1%)  |  | 1/1012 ( <0.1%) |  | 2/1975 ( 0.1%)  |
|                                                                     | Overall          | 2/1432 ( 0.1%)  |  | 5/1452 ( 0.3%)  |  | 7/2884 ( 0.2%)  |
| Hyperthyroidism                                                     | 1st year         | 0/1432          |  | 1/1452 ( <0.1%) |  | 1/2884 ( <0.1%) |
|                                                                     | 3rd year         | 0/ 963          |  | 1/1012 ( <0.1%) |  | 1/1975 ( <0.1%) |
|                                                                     | Overall          | 0/1432          |  | 2/1452 ( 0.1%)  |  | 2/2884 ( <0.1%) |
| Hypothyroidism                                                      | 1st year         | 2/1432 ( 0.1%)  |  | 9/1452 ( 0.6%)  |  | 11/2884 ( 0.4%) |
|                                                                     | 2nd year         | 4/1166 ( 0.3%)  |  | 0/1206          |  | 4/2372 ( 0.2%)  |
|                                                                     | 3rd year         | 1/ 963 ( 0.1%)  |  | 4/1012 ( 0.4%)  |  | 5/1975 ( 0.3%)  |
|                                                                     | Overall          | 7/1432 ( 0.5%)  |  | 13/1452 ( 0.9%) |  | 20/2884 ( 0.7%) |

**Table 14.3.1 / 9: Number of subjects with adverse events by primary system organ class, preferred term and year (FAS)**

| Primary system organ class<br>Preferred term<br>MedDRA version 14.0 | YEAR OF<br>ONSET | LCS             |                 | Total           |
|---------------------------------------------------------------------|------------------|-----------------|-----------------|-----------------|
|                                                                     |                  | LCS12           | LCS16           |                 |
| Thyroid mass                                                        | 1st year         | 0/1432          | 1/1452 ( <0.1%) | 1/2884 ( <0.1%) |
|                                                                     | Overall          | 0/1432          | 1/1452 ( <0.1%) | 1/2884 ( <0.1%) |
| Thyroiditis                                                         | 1st year         | 1/1432 ( <0.1%) | 0/1452          | 1/2884 ( <0.1%) |
|                                                                     | Overall          | 1/1432 ( <0.1%) | 0/1452          | 1/2884 ( <0.1%) |
| Eye disorders                                                       | 1st year         | 14/1432 ( 1.0%) | 11/1452 ( 0.8%) | 25/2884 ( 0.9%) |
|                                                                     | 2nd year         | 4/1166 ( 0.3%)  | 5/1206 ( 0.4%)  | 9/2372 ( 0.4%)  |
|                                                                     | 3rd year         | 7/ 963 ( 0.7%)  | 7/1012 ( 0.7%)  | 14/1975 ( 0.7%) |
|                                                                     | Overall          | 25/1432 ( 1.7%) | 23/1452 ( 1.6%) | 48/2884 ( 1.7%) |
| Blepharitis                                                         | 1st year         | 0/1432          | 2/1452 ( 0.1%)  | 2/2884 ( <0.1%) |
|                                                                     | 2nd year         | 1/1166 ( <0.1%) | 0/1206          | 1/2372 ( <0.1%) |
|                                                                     | Overall          | 1/1432 ( <0.1%) | 2/1452 ( 0.1%)  | 3/2884 ( 0.1%)  |
| Chalazion                                                           | 1st year         | 0/1432          | 1/1452 ( <0.1%) | 1/2884 ( <0.1%) |
|                                                                     | Overall          | 0/1432          | 1/1452 ( <0.1%) | 1/2884 ( <0.1%) |
| Conjunctivitis                                                      | 1st year         | 11/1432 ( 0.8%) | 6/1452 ( 0.4%)  | 17/2884 ( 0.6%) |
|                                                                     | 2nd year         | 2/1166 ( 0.2%)  | 4/1206 ( 0.3%)  | 6/2372 ( 0.3%)  |
|                                                                     | 3rd year         | 2/ 963 ( 0.2%)  | 5/1012 ( 0.5%)  | 7/1975 ( 0.4%)  |
|                                                                     | Overall          | 15/1432 ( 1.0%) | 15/1452 ( 1.0%) | 30/2884 ( 1.0%) |
| Conjunctivitis allergic                                             | 3rd year         | 2/ 963 ( 0.2%)  | 2/1012 ( 0.2%)  | 4/1975 ( 0.2%)  |
|                                                                     | Overall          | 2/1432 ( 0.1%)  | 2/1452 ( 0.1%)  | 4/2884 ( 0.1%)  |
| Dry eye                                                             | 1st year         | 2/1432 ( 0.1%)  | 0/1452          | 2/2884 ( <0.1%) |
|                                                                     | Overall          | 2/1432 ( 0.1%)  | 0/1452          | 2/2884 ( <0.1%) |
| Eye inflammation                                                    | 2nd year         | 0/1166          | 1/1206 ( <0.1%) | 1/2372 ( <0.1%) |
|                                                                     | Overall          | 0/1432          | 1/1452 ( <0.1%) | 1/2884 ( <0.1%) |
| Eyelid cyst                                                         | 1st year         | 0/1432          | 1/1452 ( <0.1%) | 1/2884 ( <0.1%) |
|                                                                     | Overall          | 0/1432          | 1/1452 ( <0.1%) | 1/2884 ( <0.1%) |
| Heterophoria                                                        | 2nd year         | 1/1166 ( <0.1%) | 0/1206          | 1/2372 ( <0.1%) |
|                                                                     | Overall          | 1/1432 ( <0.1%) | 0/1452          | 1/2884 ( <0.1%) |

**Table 14.3.1 / 9: Number of subjects with adverse events by primary system organ class, preferred term and year (FAS)**

| Primary system organ class<br>Preferred term<br>MedDRA version 14.0 | YEAR OF<br>ONSET | YEAR OF           |                   | Total             |
|---------------------------------------------------------------------|------------------|-------------------|-------------------|-------------------|
|                                                                     |                  | LCS12             | LCS16             |                   |
| Iridocyclitis                                                       | 1st year         | 1/1432 ( <0.1%)   | 0/1452            | 1/2884 ( <0.1%)   |
|                                                                     | Overall          | 1/1432 ( <0.1%)   | 0/1452            | 1/2884 ( <0.1%)   |
| Iritis                                                              | 1st year         | 0/1432            | 1/1452 ( <0.1%)   | 1/2884 ( <0.1%)   |
|                                                                     | 2nd year         | 0/1166            | 1/1206 ( <0.1%)   | 1/2372 ( <0.1%)   |
|                                                                     | Overall          | 0/1432            | 2/1452 ( 0.1%)    | 2/2884 ( <0.1%)   |
| Meibomianitis                                                       | 1st year         | 1/1432 ( <0.1%)   | 0/1452            | 1/2884 ( <0.1%)   |
|                                                                     | Overall          | 1/1432 ( <0.1%)   | 0/1452            | 1/2884 ( <0.1%)   |
| Myopia                                                              | 1st year         | 0/1432            | 1/1452 ( <0.1%)   | 1/2884 ( <0.1%)   |
|                                                                     | Overall          | 0/1432            | 1/1452 ( <0.1%)   | 1/2884 ( <0.1%)   |
| Ocular icterus                                                      | 1st year         | 0/1432            | 1/1452 ( <0.1%)   | 1/2884 ( <0.1%)   |
|                                                                     | Overall          | 0/1432            | 1/1452 ( <0.1%)   | 1/2884 ( <0.1%)   |
| Panophthalmitis                                                     | 3rd year         | 1/ 963 ( 0.1%)    | 0/1012            | 1/1975 ( <0.1%)   |
|                                                                     | Overall          | 1/1432 ( <0.1%)   | 0/1452            | 1/2884 ( <0.1%)   |
| Scotoma                                                             | 3rd year         | 1/ 963 ( 0.1%)    | 0/1012            | 1/1975 ( <0.1%)   |
|                                                                     | Overall          | 1/1432 ( <0.1%)   | 0/1452            | 1/2884 ( <0.1%)   |
| Vision blurred                                                      | 3rd year         | 1/ 963 ( 0.1%)    | 0/1012            | 1/1975 ( <0.1%)   |
|                                                                     | Overall          | 1/1432 ( <0.1%)   | 0/1452            | 1/2884 ( <0.1%)   |
| Gastrointestinal disorders                                          | 1st year         | 236/1432 ( 16.5%) | 218/1452 ( 15.0%) | 454/2884 ( 15.7%) |
|                                                                     | 2nd year         | 81/1166 ( 6.9%)   | 93/1206 ( 7.7%)   | 174/2372 ( 7.3%)  |
|                                                                     | 3rd year         | 54/ 963 ( 5.6%)   | 63/1012 ( 6.2%)   | 117/1975 ( 5.9%)  |
|                                                                     | Overall          | 335/1432 ( 23.4%) | 320/1452 ( 22.0%) | 655/2884 ( 22.7%) |
| Abdominal adhesions                                                 | 2nd year         | 1/1166 ( <0.1%)   | 0/1206            | 1/2372 ( <0.1%)   |
|                                                                     | Overall          | 1/1432 ( <0.1%)   | 0/1452            | 1/2884 ( <0.1%)   |
| Abdominal discomfort                                                | 1st year         | 5/1432 ( 0.3%)    | 3/1452 ( 0.2%)    | 8/2884 ( 0.3%)    |
|                                                                     | 2nd year         | 1/1166 ( <0.1%)   | 3/1206 ( 0.2%)    | 4/2372 ( 0.2%)    |
|                                                                     | Overall          | 5/1432 ( 0.3%)    | 6/1452 ( 0.4%)    | 11/2884 ( 0.4%)   |

**Table 14.3.1 / 9: Number of subjects with adverse events by primary system organ class, preferred term and year (FAS)**

| Primary system organ class<br>Preferred term<br>MedDRA version 14.0 | YEAR OF<br>ONSET | LCS12            | LCS16            | Total            |
|---------------------------------------------------------------------|------------------|------------------|------------------|------------------|
| Abdominal distension                                                | 1st year         | 17/1432 ( 1.2%)  | 10/1452 ( 0.7%)  | 27/2884 ( 0.9%)  |
|                                                                     | 2nd year         | 3/1166 ( 0.3%)   | 2/1206 ( 0.2%)   | 5/2372 ( 0.2%)   |
|                                                                     | 3rd year         | 1/ 963 ( 0.1%)   | 0/1012           | 1/1975 ( <0.1%)  |
|                                                                     | Overall          | 21/1432 ( 1.5%)  | 11/1452 ( 0.8%)  | 32/2884 ( 1.1%)  |
|                                                                     |                  |                  |                  |                  |
| Abdominal hernia                                                    | 1st year         | 1/1432 ( <0.1%)  | 0/1452           | 1/2884 ( <0.1%)  |
|                                                                     | 3rd year         | 1/ 963 ( 0.1%)   | 0/1012           | 1/1975 ( <0.1%)  |
|                                                                     | Overall          | 2/1432 ( 0.1%)   | 0/1452           | 2/2884 ( <0.1%)  |
| Abdominal mass                                                      | 1st year         | 1/1432 ( <0.1%)  | 0/1452           | 1/2884 ( <0.1%)  |
|                                                                     | Overall          | 1/1432 ( <0.1%)  | 0/1452           | 1/2884 ( <0.1%)  |
| Abdominal pain                                                      | 1st year         | 75/1432 ( 5.2%)  | 60/1452 ( 4.1%)  | 135/2884 ( 4.7%) |
|                                                                     | 2nd year         | 20/1166 ( 1.7%)  | 29/1206 ( 2.4%)  | 49/2372 ( 2.1%)  |
|                                                                     | 3rd year         | 11/ 963 ( 1.1%)  | 21/1012 ( 2.1%)  | 32/1975 ( 1.6%)  |
|                                                                     | Overall          | 100/1432 ( 7.0%) | 101/1452 ( 7.0%) | 201/2884 ( 7.0%) |
|                                                                     |                  |                  |                  |                  |
| Abdominal pain lower                                                | 1st year         | 47/1432 ( 3.3%)  | 43/1452 ( 3.0%)  | 90/2884 ( 3.1%)  |
|                                                                     | 2nd year         | 14/1166 ( 1.2%)  | 16/1206 ( 1.3%)  | 30/2372 ( 1.3%)  |
|                                                                     | 3rd year         | 8/ 963 ( 0.8%)   | 9/1012 ( 0.9%)   | 17/1975 ( 0.9%)  |
|                                                                     | Overall          | 67/1432 ( 4.7%)  | 61/1452 ( 4.2%)  | 128/2884 ( 4.4%) |
|                                                                     |                  |                  |                  |                  |
| Abdominal pain upper                                                | 1st year         | 5/1432 ( 0.3%)   | 7/1452 ( 0.5%)   | 12/2884 ( 0.4%)  |
|                                                                     | 2nd year         | 1/1166 ( <0.1%)  | 2/1206 ( 0.2%)   | 3/2372 ( 0.1%)   |
|                                                                     | 3rd year         | 1/ 963 ( 0.1%)   | 2/1012 ( 0.2%)   | 3/1975 ( 0.2%)   |
|                                                                     | Overall          | 7/1432 ( 0.5%)   | 11/1452 ( 0.8%)  | 18/2884 ( 0.6%)  |
|                                                                     |                  |                  |                  |                  |
| Abdominal tenderness                                                | 1st year         | 2/1432 ( 0.1%)   | 0/1452           | 2/2884 ( <0.1%)  |
|                                                                     | Overall          | 2/1432 ( 0.1%)   | 0/1452           | 2/2884 ( <0.1%)  |
| Anal fissure                                                        | 1st year         | 0/1432           | 1/1452 ( <0.1%)  | 1/2884 ( <0.1%)  |
|                                                                     | 2nd year         | 1/1166 ( <0.1%)  | 1/1206 ( <0.1%)  | 2/2372 ( <0.1%)  |
|                                                                     | Overall          | 1/1432 ( <0.1%)  | 2/1452 ( 0.1%)   | 3/2884 ( 0.1%)   |
| Anal pruritus                                                       | 1st year         | 1/1432 ( <0.1%)  | 0/1452           | 1/2884 ( <0.1%)  |
|                                                                     | 2nd year         | 1/1166 ( <0.1%)  | 1/1206 ( <0.1%)  | 2/2372 ( <0.1%)  |
|                                                                     | 3rd year         | 1/ 963 ( 0.1%)   | 1/1012 ( <0.1%)  | 2/1975 ( 0.1%)   |
|                                                                     | Overall          | 3/1432 ( 0.2%)   | 2/1452 ( 0.1%)   | 5/2884 ( 0.2%)   |
|                                                                     |                  |                  |                  |                  |

**Table 14.3.1 / 9: Number of subjects with adverse events by primary system organ class, preferred term and year (FAS)**

| Primary system organ class<br>Preferred term<br>MedDRA version 14.0 | YEAR OF<br>ONSET | LCS12           | LCS16           | Total           |
|---------------------------------------------------------------------|------------------|-----------------|-----------------|-----------------|
| Anal skin tags                                                      | 2nd year         | 0/1166          | 1/1206 ( <0.1%) | 1/2372 ( <0.1%) |
|                                                                     | Overall          | 0/1432          | 1/1452 ( <0.1%) | 1/2884 ( <0.1%) |
| Aphthous stomatitis                                                 | 1st year         | 0/1432          | 1/1452 ( <0.1%) | 1/2884 ( <0.1%) |
|                                                                     | Overall          | 0/1432          | 1/1452 ( <0.1%) | 1/2884 ( <0.1%) |
| Breath odour                                                        | 2nd year         | 1/1166 ( <0.1%) | 0/1206          | 1/2372 ( <0.1%) |
|                                                                     | Overall          | 1/1432 ( <0.1%) | 0/1452          | 1/2884 ( <0.1%) |
| Coeliac disease                                                     | 2nd year         | 1/1166 ( <0.1%) | 0/1206          | 1/2372 ( <0.1%) |
|                                                                     | Overall          | 1/1432 ( <0.1%) | 0/1452          | 1/2884 ( <0.1%) |
| Colitis                                                             | 1st year         | 0/1432          | 2/1452 ( 0.1%)  | 2/2884 ( <0.1%) |
|                                                                     | 2nd year         | 1/1166 ( <0.1%) | 1/1206 ( <0.1%) | 2/2372 ( <0.1%) |
|                                                                     | Overall          | 1/1432 ( <0.1%) | 3/1452 ( 0.2%)  | 4/2884 ( 0.1%)  |
| Colitis ulcerative                                                  | 1st year         | 1/1432 ( <0.1%) | 0/1452          | 1/2884 ( <0.1%) |
|                                                                     | 2nd year         | 1/1166 ( <0.1%) | 0/1206          | 1/2372 ( <0.1%) |
|                                                                     | Overall          | 2/1432 ( 0.1%)  | 0/1452          | 2/2884 ( <0.1%) |
| Colonic polyp                                                       | 2nd year         | 1/1166 ( <0.1%) | 0/1206          | 1/2372 ( <0.1%) |
|                                                                     | Overall          | 1/1432 ( <0.1%) | 0/1452          | 1/2884 ( <0.1%) |
| Constipation                                                        | 1st year         | 11/1432 ( 0.8%) | 9/1452 ( 0.6%)  | 20/2884 ( 0.7%) |
|                                                                     | 2nd year         | 3/1166 ( 0.3%)  | 6/1206 ( 0.5%)  | 9/2372 ( 0.4%)  |
|                                                                     | 3rd year         | 3/ 963 ( 0.3%)  | 3/1012 ( 0.3%)  | 6/1975 ( 0.3%)  |
|                                                                     | Overall          | 16/1432 ( 1.1%) | 18/1452 ( 1.2%) | 34/2884 ( 1.2%) |
| Crohn's disease                                                     | 1st year         | 2/1432 ( 0.1%)  | 0/1452          | 2/2884 ( <0.1%) |
|                                                                     | Overall          | 2/1432 ( 0.1%)  | 0/1452          | 2/2884 ( <0.1%) |
| Dental caries                                                       | 1st year         | 1/1432 ( <0.1%) | 1/1452 ( <0.1%) | 2/2884 ( <0.1%) |
|                                                                     | 3rd year         | 0/ 963          | 2/1012 ( 0.2%)  | 2/1975 ( 0.1%)  |
|                                                                     | Overall          | 1/1432 ( <0.1%) | 3/1452 ( 0.2%)  | 4/2884 ( 0.1%)  |
| Diarrhoea                                                           | 1st year         | 13/1432 ( 0.9%) | 16/1452 ( 1.1%) | 29/2884 ( 1.0%) |
|                                                                     | 2nd year         | 2/1166 ( 0.2%)  | 7/1206 ( 0.6%)  | 9/2372 ( 0.4%)  |
|                                                                     | 3rd year         | 4/ 963 ( 0.4%)  | 5/1012 ( 0.5%)  | 9/1975 ( 0.5%)  |
|                                                                     | Overall          | 19/1432 ( 1.3%) | 27/1452 ( 1.9%) | 46/2884 ( 1.6%) |



**Table 14.3.1 / 9: Number of subjects with adverse events by primary system organ class, preferred term and year (FAS)**

| Primary system organ class<br>Preferred term<br>MedDRA version 14.0 | YEAR OF<br>ONSET | LCS12           |  | LCS16           |  | Total           |
|---------------------------------------------------------------------|------------------|-----------------|--|-----------------|--|-----------------|
|                                                                     |                  |                 |  |                 |  |                 |
| Dry mouth                                                           | 3rd year         | 0/ 963          |  | 1/1012 ( <0.1%) |  | 1/1975 ( <0.1%) |
|                                                                     | Overall          | 0/1432          |  | 1/1452 ( <0.1%) |  | 1/2884 ( <0.1%) |
| Duodenal ulcer                                                      | 3rd year         | 1/ 963 ( 0.1%)  |  | 0/1012          |  | 1/1975 ( <0.1%) |
|                                                                     | Overall          | 1/1432 ( <0.1%) |  | 0/1452          |  | 1/2884 ( <0.1%) |
| Dyspepsia                                                           | 1st year         | 6/1432 ( 0.4%)  |  | 7/1452 ( 0.5%)  |  | 13/2884 ( 0.5%) |
|                                                                     | 2nd year         | 3/1166 ( 0.3%)  |  | 3/1206 ( 0.2%)  |  | 6/2372 ( 0.3%)  |
|                                                                     | 3rd year         | 5/ 963 ( 0.5%)  |  | 2/1012 ( 0.2%)  |  | 7/1975 ( 0.4%)  |
|                                                                     | Overall          | 14/1432 ( 1.0%) |  | 12/1452 ( 0.8%) |  | 26/2884 ( 0.9%) |
| Dysphagia                                                           | 1st year         | 1/1432 ( <0.1%) |  | 0/1452          |  | 1/2884 ( <0.1%) |
|                                                                     | 2nd year         | 0/1166          |  | 1/1206 ( <0.1%) |  | 1/2372 ( <0.1%) |
|                                                                     | Overall          | 1/1432 ( <0.1%) |  | 1/1452 ( <0.1%) |  | 2/2884 ( <0.1%) |
| Flatulence                                                          | 1st year         | 2/1432 ( 0.1%)  |  | 2/1452 ( 0.1%)  |  | 4/2884 ( 0.1%)  |
|                                                                     | Overall          | 2/1432 ( 0.1%)  |  | 2/1452 ( 0.1%)  |  | 4/2884 ( 0.1%)  |
| Food poisoning                                                      | 1st year         | 1/1432 ( <0.1%) |  | 3/1452 ( 0.2%)  |  | 4/2884 ( 0.1%)  |
|                                                                     | 2nd year         | 0/1166          |  | 4/1206 ( 0.3%)  |  | 4/2372 ( 0.2%)  |
|                                                                     | Overall          | 1/1432 ( <0.1%) |  | 6/1452 ( 0.4%)  |  | 7/2884 ( 0.2%)  |
| Frequent bowel movements                                            | 1st year         | 2/1432 ( 0.1%)  |  | 0/1452          |  | 2/2884 ( <0.1%) |
|                                                                     | Overall          | 2/1432 ( 0.1%)  |  | 0/1452          |  | 2/2884 ( <0.1%) |
| Gastric ulcer                                                       | 1st year         | 1/1432 ( <0.1%) |  | 1/1452 ( <0.1%) |  | 2/2884 ( <0.1%) |
|                                                                     | 2nd year         | 1/1166 ( <0.1%) |  | 0/1206          |  | 1/2372 ( <0.1%) |
|                                                                     | Overall          | 2/1432 ( 0.1%)  |  | 1/1452 ( <0.1%) |  | 3/2884 ( 0.1%)  |
| Gastritis                                                           | 1st year         | 6/1432 ( 0.4%)  |  | 5/1452 ( 0.3%)  |  | 11/2884 ( 0.4%) |
|                                                                     | 2nd year         | 2/1166 ( 0.2%)  |  | 8/1206 ( 0.7%)  |  | 10/2372 ( 0.4%) |
|                                                                     | 3rd year         | 5/ 963 ( 0.5%)  |  | 3/1012 ( 0.3%)  |  | 8/1975 ( 0.4%)  |
|                                                                     | Overall          | 13/1432 ( 0.9%) |  | 16/1452 ( 1.1%) |  | 29/2884 ( 1.0%) |
| Gastrointestinal disorder                                           | 2nd year         | 1/1166 ( <0.1%) |  | 0/1206          |  | 1/2372 ( <0.1%) |
|                                                                     | Overall          | 1/1432 ( <0.1%) |  | 0/1452          |  | 1/2884 ( <0.1%) |
| Gastrointestinal pain                                               | 1st year         | 1/1432 ( <0.1%) |  | 1/1452 ( <0.1%) |  | 2/2884 ( <0.1%) |
|                                                                     | Overall          | 1/1432 ( <0.1%) |  | 1/1452 ( <0.1%) |  | 2/2884 ( <0.1%) |

**Table 14.3.1 / 9: Number of subjects with adverse events by primary system organ class, preferred term and year (FAS)**

| Primary system organ class<br>Preferred term<br>MedDRA version 14.0 | YEAR OF<br>ONSET | LCS12          | LCS16           | Total           |
|---------------------------------------------------------------------|------------------|----------------|-----------------|-----------------|
| Gastroesophageal reflux disease                                     | 1st year         | 6/1432 ( 0.4%) | 6/1452 ( 0.4%)  | 12/2884 ( 0.4%) |
|                                                                     | 2nd year         | 2/1166 ( 0.2%) | 3/1206 ( 0.2%)  | 5/2372 ( 0.2%)  |
|                                                                     | 3rd year         | 1/ 963 ( 0.1%) | 2/1012 ( 0.2%)  | 3/1975 ( 0.2%)  |
|                                                                     | Overall          | 9/1432 ( 0.6%) | 11/1452 ( 0.8%) | 20/2884 ( 0.7%) |
|                                                                     |                  |                |                 |                 |
| Gingival oedema                                                     | 3rd year         | 1/ 963 ( 0.1%) | 0/1012          | 1/1975 (<0.1%)  |
|                                                                     | Overall          | 1/1432 (<0.1%) | 0/1452          | 1/2884 (<0.1%)  |
| Gingival recession                                                  | 1st year         | 1/1432 (<0.1%) | 0/1452          | 1/2884 (<0.1%)  |
|                                                                     | Overall          | 1/1432 (<0.1%) | 0/1452          | 1/2884 (<0.1%)  |
| Gingivitis                                                          | 1st year         | 1/1432 (<0.1%) | 0/1452          | 1/2884 (<0.1%)  |
|                                                                     | 2nd year         | 0/1166         | 1/1206 (<0.1%)  | 1/2372 (<0.1%)  |
|                                                                     | Overall          | 1/1432 (<0.1%) | 1/1452 (<0.1%)  | 2/2884 (<0.1%)  |
| Haematochezia                                                       | 2nd year         | 1/1166 (<0.1%) | 1/1206 (<0.1%)  | 2/2372 (<0.1%)  |
|                                                                     | Overall          | 1/1432 (<0.1%) | 1/1452 (<0.1%)  | 2/2884 (<0.1%)  |
| Haemorrhoids                                                        | 1st year         | 3/1432 ( 0.2%) | 5/1452 ( 0.3%)  | 8/2884 ( 0.3%)  |
|                                                                     | 2nd year         | 2/1166 ( 0.2%) | 3/1206 ( 0.2%)  | 5/2372 ( 0.2%)  |
|                                                                     | 3rd year         | 2/ 963 ( 0.2%) | 0/1012          | 2/1975 ( 0.1%)  |
|                                                                     | Overall          | 7/1432 ( 0.5%) | 8/1452 ( 0.6%)  | 15/2884 ( 0.5%) |
| Hiatus hernia                                                       | 2nd year         | 0/1166         | 1/1206 (<0.1%)  | 1/2372 (<0.1%)  |
|                                                                     | Overall          | 0/1432         | 1/1452 (<0.1%)  | 1/2884 (<0.1%)  |
| Hyperchlorhydria                                                    | 1st year         | 1/1432 (<0.1%) | 1/1452 (<0.1%)  | 2/2884 (<0.1%)  |
|                                                                     | 2nd year         | 1/1166 (<0.1%) | 0/1206          | 1/2372 (<0.1%)  |
|                                                                     | Overall          | 2/1432 ( 0.1%) | 1/1452 (<0.1%)  | 3/2884 ( 0.1%)  |
| Impaired gastric emptying                                           | 1st year         | 1/1432 (<0.1%) | 0/1452          | 1/2884 (<0.1%)  |
|                                                                     | Overall          | 1/1432 (<0.1%) | 0/1452          | 1/2884 (<0.1%)  |
| Inflammatory bowel disease                                          | 3rd year         | 0/ 963         | 1/1012 (<0.1%)  | 1/1975 (<0.1%)  |
|                                                                     | Overall          | 0/1432         | 1/1452 (<0.1%)  | 1/2884 (<0.1%)  |
| Inguinal hernia                                                     | 2nd year         | 1/1166 (<0.1%) | 0/1206          | 1/2372 (<0.1%)  |
|                                                                     | Overall          | 1/1432 (<0.1%) | 0/1452          | 1/2884 (<0.1%)  |

**Table 14.3.1 / 9: Number of subjects with adverse events by primary system organ class, preferred term and year (FAS)**

| Primary system organ class<br>Preferred term<br>MedDRA version 14.0 | YEAR OF<br>ONSET | LCS12           | LCS16           | Total            |
|---------------------------------------------------------------------|------------------|-----------------|-----------------|------------------|
| Irritable bowel syndrome                                            | 1st year         | 5/1432 ( 0.3%)  | 2/1452 ( 0.1%)  | 7/2884 ( 0.2%)   |
|                                                                     | 2nd year         | 4/1166 ( 0.3%)  | 1/1206 ( <0.1%) | 5/2372 ( 0.2%)   |
|                                                                     | 3rd year         | 2/ 963 ( 0.2%)  | 3/1012 ( 0.3%)  | 5/1975 ( 0.3%)   |
|                                                                     | Overall          | 11/1432 ( 0.8%) | 5/1452 ( 0.3%)  | 16/2884 ( 0.6%)  |
|                                                                     |                  |                 |                 |                  |
| Mouth ulceration                                                    | 1st year         | 0/1432          | 2/1452 ( 0.1%)  | 2/2884 ( <0.1%)  |
|                                                                     | Overall          | 0/1432          | 2/1452 ( 0.1%)  | 2/2884 ( <0.1%)  |
| Nausea                                                              | 1st year         | 49/1432 ( 3.4%) | 41/1452 ( 2.8%) | 90/2884 ( 3.1%)  |
|                                                                     | 2nd year         | 18/1166 ( 1.5%) | 8/1206 ( 0.7%)  | 26/2372 ( 1.1%)  |
|                                                                     | 3rd year         | 9/ 963 ( 0.9%)  | 12/1012 ( 1.2%) | 21/1975 ( 1.1%)  |
|                                                                     | Overall          | 74/1432 ( 5.2%) | 58/1452 ( 4.0%) | 132/2884 ( 4.6%) |
| Odynophagia                                                         | 2nd year         | 0/1166          | 1/1206 ( <0.1%) | 1/2372 ( <0.1%)  |
|                                                                     | Overall          | 0/1432          | 1/1452 ( <0.1%) | 1/2884 ( <0.1%)  |
| Oesophageal stenosis                                                | 2nd year         | 0/1166          | 1/1206 ( <0.1%) | 1/2372 ( <0.1%)  |
|                                                                     | Overall          | 0/1432          | 1/1452 ( <0.1%) | 1/2884 ( <0.1%)  |
| Oesophagitis                                                        | 3rd year         | 1/ 963 ( 0.1%)  | 0/1012          | 1/1975 ( <0.1%)  |
|                                                                     | Overall          | 1/1432 ( <0.1%) | 0/1452          | 1/2884 ( <0.1%)  |
| Oral pain                                                           | 1st year         | 0/1432          | 1/1452 ( <0.1%) | 1/2884 ( <0.1%)  |
|                                                                     | Overall          | 0/1432          | 1/1452 ( <0.1%) | 1/2884 ( <0.1%)  |
| Peptic ulcer                                                        | 2nd year         | 1/1166 ( <0.1%) | 0/1206          | 1/2372 ( <0.1%)  |
|                                                                     | Overall          | 1/1432 ( <0.1%) | 0/1452          | 1/2884 ( <0.1%)  |
| Periodontitis                                                       | 1st year         | 1/1432 ( <0.1%) | 0/1452          | 1/2884 ( <0.1%)  |
|                                                                     | 3rd year         | 1/ 963 ( 0.1%)  | 1/1012 ( <0.1%) | 2/1975 ( 0.1%)   |
|                                                                     | Overall          | 2/1432 ( 0.1%)  | 1/1452 ( <0.1%) | 3/2884 ( 0.1%)   |
| Peritonitis                                                         | 2nd year         | 1/1166 ( <0.1%) | 0/1206          | 1/2372 ( <0.1%)  |
|                                                                     | Overall          | 1/1432 ( <0.1%) | 0/1452          | 1/2884 ( <0.1%)  |
| Proctalgia                                                          | 2nd year         | 2/1166 ( 0.2%)  | 1/1206 ( <0.1%) | 3/2372 ( 0.1%)   |
|                                                                     | Overall          | 2/1432 ( 0.1%)  | 1/1452 ( <0.1%) | 3/2884 ( 0.1%)   |

**Table 14.3.1 / 9: Number of subjects with adverse events by primary system organ class, preferred term and year (FAS)**

| Primary system organ class<br>Preferred term<br>MedDRA version 14.0 | YEAR OF<br>ONSET | LCS12            | LCS16            | Total            |
|---------------------------------------------------------------------|------------------|------------------|------------------|------------------|
| Rectal haemorrhage                                                  | 1st year         | 0/1432           | 2/1452 ( 0.1%)   | 2/2884 ( <0.1%)  |
|                                                                     | 2nd year         | 0/1166           | 1/1206 ( <0.1%)  | 1/2372 ( <0.1%)  |
|                                                                     | Overall          | 0/1432           | 3/1452 ( 0.2%)   | 3/2884 ( 0.1%)   |
| Reflux oesophagitis                                                 | 1st year         | 0/1432           | 1/1452 ( <0.1%)  | 1/2884 ( <0.1%)  |
|                                                                     | 2nd year         | 0/1166           | 1/1206 ( <0.1%)  | 1/2372 ( <0.1%)  |
|                                                                     | Overall          | 0/1432           | 1/1452 ( <0.1%)  | 1/2884 ( <0.1%)  |
| Salivary gland calculus                                             | 1st year         | 0/1432           | 1/1452 ( <0.1%)  | 1/2884 ( <0.1%)  |
|                                                                     | Overall          | 0/1432           | 1/1452 ( <0.1%)  | 1/2884 ( <0.1%)  |
| Tooth disorder                                                      | 1st year         | 3/1432 ( 0.2%)   | 0/1452           | 3/2884 ( 0.1%)   |
|                                                                     | 2nd year         | 0/1166           | 1/1206 ( <0.1%)  | 1/2372 ( <0.1%)  |
|                                                                     | Overall          | 3/1432 ( 0.2%)   | 1/1452 ( <0.1%)  | 4/2884 ( 0.1%)   |
| Tooth impacted                                                      | 1st year         | 1/1432 ( <0.1%)  | 0/1452           | 1/2884 ( <0.1%)  |
|                                                                     | 2nd year         | 1/1166 ( <0.1%)  | 0/1206           | 1/2372 ( <0.1%)  |
|                                                                     | Overall          | 2/1432 ( 0.1%)   | 0/1452           | 2/2884 ( <0.1%)  |
| Toothache                                                           | 1st year         | 12/1432 ( 0.8%)  | 15/1452 ( 1.0%)  | 27/2884 ( 0.9%)  |
|                                                                     | 2nd year         | 2/1166 ( 0.2%)   | 9/1206 ( 0.7%)   | 11/2372 ( 0.5%)  |
|                                                                     | 3rd year         | 4/ 963 ( 0.4%)   | 5/1012 ( 0.5%)   | 9/1975 ( 0.5%)   |
|                                                                     | Overall          | 17/1432 ( 1.2%)  | 26/1452 ( 1.8%)  | 43/2884 ( 1.5%)  |
| Umbilical hernia                                                    | 3rd year         | 0/ 963           | 1/1012 ( <0.1%)  | 1/1975 ( <0.1%)  |
|                                                                     | Overall          | 0/1432           | 1/1452 ( <0.1%)  | 1/2884 ( <0.1%)  |
| Vomiting                                                            | 1st year         | 12/1432 ( 0.8%)  | 13/1452 ( 0.9%)  | 25/2884 ( 0.9%)  |
|                                                                     | 2nd year         | 4/1166 ( 0.3%)   | 6/1206 ( 0.5%)   | 10/2372 ( 0.4%)  |
|                                                                     | 3rd year         | 1/ 963 ( 0.1%)   | 5/1012 ( 0.5%)   | 6/1975 ( 0.3%)   |
|                                                                     | Overall          | 17/1432 ( 1.2%)  | 24/1452 ( 1.7%)  | 41/2884 ( 1.4%)  |
| General disorders and administration site conditions                | 1st year         | 63/1432 ( 4.4%)  | 72/1452 ( 5.0%)  | 135/2884 ( 4.7%) |
|                                                                     | 2nd year         | 34/1166 ( 2.9%)  | 30/1206 ( 2.5%)  | 64/2372 ( 2.7%)  |
|                                                                     | 3rd year         | 22/ 963 ( 2.3%)  | 20/1012 ( 2.0%)  | 42/1975 ( 2.1%)  |
|                                                                     | Overall          | 113/1432 ( 7.9%) | 119/1452 ( 8.2%) | 232/2884 ( 8.0%) |
| Asthenia                                                            | 1st year         | 1/1432 ( <0.1%)  | 1/1452 ( <0.1%)  | 2/2884 ( <0.1%)  |
|                                                                     | 2nd year         | 1/1166 ( <0.1%)  | 0/1206           | 1/2372 ( <0.1%)  |
|                                                                     | Overall          | 2/1432 ( 0.1%)   | 1/1452 ( <0.1%)  | 3/2884 ( 0.1%)   |

**Table 14.3.1 / 9: Number of subjects with adverse events by primary system organ class, preferred term and year (FAS)**

| Primary system organ class<br>Preferred term<br>MedDRA version 14.0 | YEAR OF<br>ONSET | LCS12           | LCS16           | Total           |
|---------------------------------------------------------------------|------------------|-----------------|-----------------|-----------------|
| Axillary pain                                                       | 2nd year         | 0/1166          | 1/1206 (<0.1%)  | 1/2372 (<0.1%)  |
|                                                                     | 3rd year         | 1/ 963 ( 0.1%)  | 0/1012          | 1/1975 (<0.1%)  |
|                                                                     | Overall          | 1/1432 (<0.1%)  | 1/1452 (<0.1%)  | 2/2884 (<0.1%)  |
|                                                                     |                  |                 |                 |                 |
| Chest pain                                                          | 1st year         | 2/1432 ( 0.1%)  | 2/1452 ( 0.1%)  | 4/2884 ( 0.1%)  |
|                                                                     | 2nd year         | 3/1166 ( 0.3%)  | 1/1206 (<0.1%)  | 4/2372 ( 0.2%)  |
|                                                                     | 3rd year         | 1/ 963 ( 0.1%)  | 4/1012 ( 0.4%)  | 5/1975 ( 0.3%)  |
|                                                                     | Overall          | 5/1432 ( 0.3%)  | 7/1452 ( 0.5%)  | 12/2884 ( 0.4%) |
| Chills                                                              | 1st year         | 0/1432          | 2/1452 ( 0.1%)  | 2/2884 (<0.1%)  |
|                                                                     | Overall          | 0/1432          | 2/1452 ( 0.1%)  | 2/2884 (<0.1%)  |
| Cyst                                                                | 1st year         | 1/1432 (<0.1%)  | 0/1452          | 1/2884 (<0.1%)  |
|                                                                     | 2nd year         | 2/1166 ( 0.2%)  | 0/1206          | 2/2372 (<0.1%)  |
|                                                                     | 3rd year         | 0/ 963          | 1/1012 (<0.1%)  | 1/1975 (<0.1%)  |
|                                                                     | Overall          | 3/1432 ( 0.2%)  | 1/1452 (<0.1%)  | 4/2884 ( 0.1%)  |
| Device dislocation                                                  | 1st year         | 2/1432 ( 0.1%)  | 3/1452 ( 0.2%)  | 5/2884 ( 0.2%)  |
|                                                                     | 2nd year         | 0/1166          | 1/1206 (<0.1%)  | 1/2372 (<0.1%)  |
|                                                                     | 3rd year         | 1/ 963 ( 0.1%)  | 1/1012 (<0.1%)  | 2/1975 ( 0.1%)  |
|                                                                     | Overall          | 3/1432 ( 0.2%)  | 5/1452 ( 0.3%)  | 8/2884 ( 0.3%)  |
| Device expulsion                                                    | 1st year         | 25/1432 ( 1.7%) | 23/1452 ( 1.6%) | 48/2884 ( 1.7%) |
|                                                                     | 2nd year         | 9/1166 ( 0.8%)  | 7/1206 ( 0.6%)  | 16/2372 ( 0.7%) |
|                                                                     | 3rd year         | 12/ 963 ( 1.2%) | 7/1012 ( 0.7%)  | 19/1975 ( 1.0%) |
|                                                                     | Overall          | 46/1432 ( 3.2%) | 37/1452 ( 2.5%) | 83/2884 ( 2.9%) |
| Discomfort                                                          | 1st year         | 1/1432 (<0.1%)  | 0/1452          | 1/2884 (<0.1%)  |
|                                                                     | 2nd year         | 1/1166 (<0.1%)  | 1/1206 (<0.1%)  | 2/2372 (<0.1%)  |
|                                                                     | Overall          | 2/1432 ( 0.1%)  | 1/1452 (<0.1%)  | 3/2884 ( 0.1%)  |
| Drug withdrawal syndrome                                            | 3rd year         | 1/ 963 ( 0.1%)  | 0/1012          | 1/1975 (<0.1%)  |
|                                                                     | Overall          | 1/1432 (<0.1%)  | 0/1452          | 1/2884 (<0.1%)  |
| Fatigue                                                             | 1st year         | 12/1432 ( 0.8%) | 19/1452 ( 1.3%) | 31/2884 ( 1.1%) |
|                                                                     | 2nd year         | 8/1166 ( 0.7%)  | 6/1206 ( 0.5%)  | 14/2372 ( 0.6%) |
|                                                                     | 3rd year         | 5/ 963 ( 0.5%)  | 2/1012 ( 0.2%)  | 7/1975 ( 0.4%)  |
|                                                                     | Overall          | 24/1432 ( 1.7%) | 27/1452 ( 1.9%) | 51/2884 ( 1.8%) |

**Table 14.3.1 / 9: Number of subjects with adverse events by primary system organ class, preferred term and year (FAS)**

| Primary system organ class<br>Preferred term<br>MedDRA version 14.0 | YEAR OF<br>ONSET | LCS12           | LCS16           | Total           |
|---------------------------------------------------------------------|------------------|-----------------|-----------------|-----------------|
| Feeling cold                                                        | 1st year         | 0/1432          | 1/1452 ( <0.1%) | 1/2884 ( <0.1%) |
|                                                                     | 2nd year         | 0/1166          | 1/1206 ( <0.1%) | 1/2372 ( <0.1%) |
|                                                                     | Overall          | 0/1432          | 2/1452 ( 0.1%)  | 2/2884 ( <0.1%) |
| Feeling hot                                                         | 1st year         | 0/1432          | 1/1452 ( <0.1%) | 1/2884 ( <0.1%) |
|                                                                     | Overall          | 0/1432          | 1/1452 ( <0.1%) | 1/2884 ( <0.1%) |
| Generalised oedema                                                  | 3rd year         | 1/ 963 ( 0.1%)  | 0/1012          | 1/1975 ( <0.1%) |
|                                                                     | Overall          | 1/1432 ( <0.1%) | 0/1452          | 1/2884 ( <0.1%) |
| Hangover                                                            | 1st year         | 1/1432 ( <0.1%) | 0/1452          | 1/2884 ( <0.1%) |
|                                                                     | Overall          | 1/1432 ( <0.1%) | 0/1452          | 1/2884 ( <0.1%) |
| Hunger                                                              | 2nd year         | 0/1166          | 1/1206 ( <0.1%) | 1/2372 ( <0.1%) |
|                                                                     | Overall          | 0/1432          | 1/1452 ( <0.1%) | 1/2884 ( <0.1%) |
| Inflammation                                                        | 1st year         | 1/1432 ( <0.1%) | 0/1452          | 1/2884 ( <0.1%) |
|                                                                     | 3rd year         | 0/ 963          | 1/1012 ( <0.1%) | 1/1975 ( <0.1%) |
|                                                                     | Overall          | 1/1432 ( <0.1%) | 1/1452 ( <0.1%) | 2/2884 ( <0.1%) |
| Influenza like illness                                              | 2nd year         | 1/1166 ( <0.1%) | 1/1206 ( <0.1%) | 2/2372 ( <0.1%) |
|                                                                     | Overall          | 1/1432 ( <0.1%) | 1/1452 ( <0.1%) | 2/2884 ( <0.1%) |
| Injury associated with device                                       | 1st year         | 0/1432          | 1/1452 ( <0.1%) | 1/2884 ( <0.1%) |
|                                                                     | Overall          | 0/1432          | 1/1452 ( <0.1%) | 1/2884 ( <0.1%) |
| Irritability                                                        | 1st year         | 2/1432 ( 0.1%)  | 4/1452 ( 0.3%)  | 6/2884 ( 0.2%)  |
|                                                                     | 2nd year         | 0/1166          | 1/1206 ( <0.1%) | 1/2372 ( <0.1%) |
|                                                                     | 3rd year         | 0/ 963          | 1/1012 ( <0.1%) | 1/1975 ( <0.1%) |
|                                                                     | Overall          | 2/1432 ( 0.1%)  | 6/1452 ( 0.4%)  | 8/2884 ( 0.3%)  |
| Localised oedema                                                    | 1st year         | 0/1432          | 1/1452 ( <0.1%) | 1/2884 ( <0.1%) |
|                                                                     | 2nd year         | 0/1166          | 1/1206 ( <0.1%) | 1/2372 ( <0.1%) |
|                                                                     | Overall          | 0/1432          | 1/1452 ( <0.1%) | 1/2884 ( <0.1%) |
| Malaise                                                             | 1st year         | 0/1432          | 1/1452 ( <0.1%) | 1/2884 ( <0.1%) |
|                                                                     | Overall          | 0/1432          | 1/1452 ( <0.1%) | 1/2884 ( <0.1%) |

**Table 14.3.1 / 9: Number of subjects with adverse events by primary system organ class, preferred term and year (FAS)**

| Primary system organ class<br>Preferred term<br>MedDRA version 14.0 | YEAR OF<br>ONSET | LCS             |                 | Total           |
|---------------------------------------------------------------------|------------------|-----------------|-----------------|-----------------|
|                                                                     |                  | LCS12           | LCS16           |                 |
| Oedema                                                              | 1st year         | 0/1432          | 1/1452 ( <0.1%) | 1/2884 ( <0.1%) |
|                                                                     | Overall          | 0/1432          | 1/1452 ( <0.1%) | 1/2884 ( <0.1%) |
| Oedema peripheral                                                   | 1st year         | 3/1432 ( 0.2%)  | 4/1452 ( 0.3%)  | 7/2884 ( 0.2%)  |
|                                                                     | 2nd year         | 1/1166 ( <0.1%) | 1/1206 ( <0.1%) | 2/2372 ( <0.1%) |
|                                                                     | 3rd year         | 0/ 963          | 1/1012 ( <0.1%) | 1/1975 ( <0.1%) |
|                                                                     | Overall          | 4/1432 ( 0.3%)  | 6/1452 ( 0.4%)  | 10/2884 ( 0.3%) |
| Pain                                                                | 1st year         | 5/1432 ( 0.3%)  | 3/1452 ( 0.2%)  | 8/2884 ( 0.3%)  |
|                                                                     | 2nd year         | 1/1166 ( <0.1%) | 1/1206 ( <0.1%) | 2/2372 ( <0.1%) |
|                                                                     | 3rd year         | 0/ 963          | 1/1012 ( <0.1%) | 1/1975 ( <0.1%) |
|                                                                     | Overall          | 6/1432 ( 0.4%)  | 5/1452 ( 0.3%)  | 11/2884 ( 0.4%) |
| Pyrexia                                                             | 1st year         | 10/1432 ( 0.7%) | 10/1452 ( 0.7%) | 20/2884 ( 0.7%) |
|                                                                     | 2nd year         | 7/1166 ( 0.6%)  | 5/1206 ( 0.4%)  | 12/2372 ( 0.5%) |
|                                                                     | 3rd year         | 1/ 963 ( 0.1%)  | 2/1012 ( 0.2%)  | 3/1975 ( 0.2%)  |
|                                                                     | Overall          | 18/1432 ( 1.3%) | 16/1452 ( 1.1%) | 34/2884 ( 1.2%) |
| Vaccination site pain                                               | 2nd year         | 1/1166 ( <0.1%) | 1/1206 ( <0.1%) | 2/2372 ( <0.1%) |
|                                                                     | Overall          | 1/1432 ( <0.1%) | 1/1452 ( <0.1%) | 2/2884 ( <0.1%) |
| Hepatobiliary disorders                                             | 1st year         | 5/1432 ( 0.3%)  | 6/1452 ( 0.4%)  | 11/2884 ( 0.4%) |
|                                                                     | 2nd year         | 2/1166 ( 0.2%)  | 3/1206 ( 0.2%)  | 5/2372 ( 0.2%)  |
|                                                                     | 3rd year         | 2/ 963 ( 0.2%)  | 2/1012 ( 0.2%)  | 4/1975 ( 0.2%)  |
|                                                                     | Overall          | 8/1432 ( 0.6%)  | 11/1452 ( 0.8%) | 19/2884 ( 0.7%) |
| Biliary colic                                                       | 1st year         | 0/1432          | 2/1452 ( 0.1%)  | 2/2884 ( <0.1%) |
|                                                                     | Overall          | 0/1432          | 2/1452 ( 0.1%)  | 2/2884 ( <0.1%) |
| Biliary dyskinesia                                                  | 2nd year         | 0/1166          | 1/1206 ( <0.1%) | 1/2372 ( <0.1%) |
|                                                                     | 3rd year         | 1/ 963 ( 0.1%)  | 0/1012          | 1/1975 ( <0.1%) |
|                                                                     | Overall          | 1/1432 ( <0.1%) | 1/1452 ( <0.1%) | 2/2884 ( <0.1%) |
| Cholecystitis                                                       | 1st year         | 1/1432 ( <0.1%) | 0/1452          | 1/2884 ( <0.1%) |
|                                                                     | 2nd year         | 0/1166          | 1/1206 ( <0.1%) | 1/2372 ( <0.1%) |
|                                                                     | 3rd year         | 2/ 963 ( 0.2%)  | 1/1012 ( <0.1%) | 3/1975 ( 0.2%)  |
|                                                                     | Overall          | 3/1432 ( 0.2%)  | 2/1452 ( 0.1%)  | 5/2884 ( 0.2%)  |

**Table 14.3.1 / 9: Number of subjects with adverse events by primary system organ class, preferred term and year (FAS)**

| Primary system organ class<br>Preferred term<br>MedDRA version 14.0 | YEAR OF<br>ONSET | LCS12           | LCS16           | Total            |
|---------------------------------------------------------------------|------------------|-----------------|-----------------|------------------|
| Cholecystitis chronic                                               | 1st year         | 1/1432 ( <0.1%) | 0/1452          | 1/2884 ( <0.1%)  |
|                                                                     | 2nd year         | 1/1166 ( <0.1%) | 0/1206          | 1/2372 ( <0.1%)  |
|                                                                     | Overall          | 2/1432 ( 0.1%)  | 0/1452          | 2/2884 ( <0.1%)  |
| Cholelithiasis                                                      | 1st year         | 3/1432 ( 0.2%)  | 1/1452 ( <0.1%) | 4/2884 ( 0.1%)   |
|                                                                     | 2nd year         | 1/1166 ( <0.1%) | 1/1206 ( <0.1%) | 2/2372 ( <0.1%)  |
|                                                                     | 3rd year         | 0/ 963          | 2/1012 ( 0.2%)  | 2/1975 ( 0.1%)   |
|                                                                     | Overall          | 4/1432 ( 0.3%)  | 4/1452 ( 0.3%)  | 8/2884 ( 0.3%)   |
| Gallbladder pain                                                    | 1st year         | 0/1432          | 1/1452 ( <0.1%) | 1/2884 ( <0.1%)  |
|                                                                     | Overall          | 0/1432          | 1/1452 ( <0.1%) | 1/2884 ( <0.1%)  |
| Gallbladder polyp                                                   | 1st year         | 1/1432 ( <0.1%) | 0/1452          | 1/2884 ( <0.1%)  |
|                                                                     | Overall          | 1/1432 ( <0.1%) | 0/1452          | 1/2884 ( <0.1%)  |
| Hepatic steatosis                                                   | 1st year         | 0/1432          | 1/1452 ( <0.1%) | 1/2884 ( <0.1%)  |
|                                                                     | Overall          | 0/1432          | 1/1452 ( <0.1%) | 1/2884 ( <0.1%)  |
| Hyperbilirubinaemia                                                 | 1st year         | 0/1432          | 1/1452 ( <0.1%) | 1/2884 ( <0.1%)  |
|                                                                     | Overall          | 0/1432          | 1/1452 ( <0.1%) | 1/2884 ( <0.1%)  |
| Immune system disorders                                             | 1st year         | 39/1432 ( 2.7%) | 37/1452 ( 2.5%) | 76/2884 ( 2.6%)  |
|                                                                     | 2nd year         | 25/1166 ( 2.1%) | 22/1206 ( 1.8%) | 47/2372 ( 2.0%)  |
|                                                                     | 3rd year         | 18/ 963 ( 1.9%) | 21/1012 ( 2.1%) | 39/1975 ( 2.0%)  |
|                                                                     | Overall          | 63/1432 ( 4.4%) | 66/1452 ( 4.5%) | 129/2884 ( 4.5%) |
| Allergy to animal                                                   | 1st year         | 0/1432          | 2/1452 ( 0.1%)  | 2/2884 ( <0.1%)  |
|                                                                     | 3rd year         | 1/ 963 ( 0.1%)  | 0/1012          | 1/1975 ( <0.1%)  |
|                                                                     | Overall          | 1/1432 ( <0.1%) | 2/1452 ( 0.1%)  | 3/2884 ( 0.1%)   |
| Allergy to arthropod bite                                           | 1st year         | 1/1432 ( <0.1%) | 0/1452          | 1/2884 ( <0.1%)  |
|                                                                     | 3rd year         | 0/ 963          | 1/1012 ( <0.1%) | 1/1975 ( <0.1%)  |
|                                                                     | Overall          | 1/1432 ( <0.1%) | 1/1452 ( <0.1%) | 2/2884 ( <0.1%)  |
| Allergy to arthropod sting                                          | 3rd year         | 0/ 963          | 1/1012 ( <0.1%) | 1/1975 ( <0.1%)  |
|                                                                     | Overall          | 0/1432          | 1/1452 ( <0.1%) | 1/2884 ( <0.1%)  |
| Allergy to chemicals                                                | 1st year         | 1/1432 ( <0.1%) | 0/1452          | 1/2884 ( <0.1%)  |
|                                                                     | Overall          | 1/1432 ( <0.1%) | 0/1452          | 1/2884 ( <0.1%)  |



**Table 14.3.1 / 9: Number of subjects with adverse events by primary system organ class, preferred term and year (FAS)**

| Primary system organ class<br>Preferred term<br>MedDRA version 14.0 | YEAR OF<br>ONSET | LCS               |                   | Total              |
|---------------------------------------------------------------------|------------------|-------------------|-------------------|--------------------|
|                                                                     |                  | LCS12             | LCS16             |                    |
| Anaphylactic reaction                                               | 3rd year         | 0/ 963            | 1/1012 ( <0.1%)   | 1/1975 ( <0.1%)    |
|                                                                     | Overall          | 0/1432            | 1/1452 ( <0.1%)   | 1/2884 ( <0.1%)    |
| Drug hypersensitivity                                               | 1st year         | 5/1432 ( 0.3%)    | 4/1452 ( 0.3%)    | 9/2884 ( 0.3%)     |
|                                                                     | 2nd year         | 2/1166 ( 0.2%)    | 0/1206            | 2/2372 ( <0.1%)    |
|                                                                     | 3rd year         | 2/ 963 ( 0.2%)    | 2/1012 ( 0.2%)    | 4/1975 ( 0.2%)     |
|                                                                     | Overall          | 9/1432 ( 0.6%)    | 6/1452 ( 0.4%)    | 15/2884 ( 0.5%)    |
| Food allergy                                                        | 1st year         | 1/1432 ( <0.1%)   | 1/1452 ( <0.1%)   | 2/2884 ( <0.1%)    |
|                                                                     | Overall          | 1/1432 ( <0.1%)   | 1/1452 ( <0.1%)   | 2/2884 ( <0.1%)    |
| Hypersensitivity                                                    | 1st year         | 8/1432 ( 0.6%)    | 6/1452 ( 0.4%)    | 14/2884 ( 0.5%)    |
|                                                                     | 2nd year         | 3/1166 ( 0.3%)    | 5/1206 ( 0.4%)    | 8/2372 ( 0.3%)     |
|                                                                     | 3rd year         | 3/ 963 ( 0.3%)    | 1/1012 ( <0.1%)   | 4/1975 ( 0.2%)     |
|                                                                     | Overall          | 13/1432 ( 0.9%)   | 11/1452 ( 0.8%)   | 24/2884 ( 0.8%)    |
| Seasonal allergy                                                    | 1st year         | 24/1432 ( 1.7%)   | 24/1452 ( 1.7%)   | 48/2884 ( 1.7%)    |
|                                                                     | 2nd year         | 20/1166 ( 1.7%)   | 17/1206 ( 1.4%)   | 37/2372 ( 1.6%)    |
|                                                                     | 3rd year         | 12/ 963 ( 1.2%)   | 16/1012 ( 1.6%)   | 28/1975 ( 1.4%)    |
|                                                                     | Overall          | 39/1432 ( 2.7%)   | 44/1452 ( 3.0%)   | 83/2884 ( 2.9%)    |
| Infections and infestations                                         | 1st year         | 534/1432 ( 37.3%) | 529/1452 ( 36.4%) | 1063/2884 ( 36.9%) |
|                                                                     | 2nd year         | 320/1166 ( 27.4%) | 335/1206 ( 27.8%) | 655/2372 ( 27.6%)  |
|                                                                     | 3rd year         | 228/ 963 ( 23.7%) | 259/1012 ( 25.6%) | 487/1975 ( 24.7%)  |
|                                                                     | Overall          | 722/1432 ( 50.4%) | 736/1452 ( 50.7%) | 1458/2884 ( 50.6%) |
| Abscess limb                                                        | 1st year         | 0/1432            | 1/1452 ( <0.1%)   | 1/2884 ( <0.1%)    |
|                                                                     | Overall          | 0/1432            | 1/1452 ( <0.1%)   | 1/2884 ( <0.1%)    |
| Acarodermatitis                                                     | 2nd year         | 1/1166 ( <0.1%)   | 0/1206            | 1/2372 ( <0.1%)    |
|                                                                     | 3rd year         | 1/ 963 ( 0.1%)    | 0/1012            | 1/1975 ( <0.1%)    |
|                                                                     | Overall          | 2/1432 ( 0.1%)    | 0/1452            | 2/2884 ( <0.1%)    |
| Acute sinusitis                                                     | 1st year         | 1/1432 ( <0.1%)   | 0/1452            | 1/2884 ( <0.1%)    |
|                                                                     | 2nd year         | 3/1166 ( 0.3%)    | 2/1206 ( 0.2%)    | 5/2372 ( 0.2%)     |
|                                                                     | 3rd year         | 4/ 963 ( 0.4%)    | 1/1012 ( <0.1%)   | 5/1975 ( 0.3%)     |
|                                                                     | Overall          | 7/1432 ( 0.5%)    | 3/1452 ( 0.2%)    | 10/2884 ( 0.3%)    |

**Table 14.3.1 / 9: Number of subjects with adverse events by primary system organ class, preferred term and year (FAS)**

| Primary system organ class<br>Preferred term<br>MedDRA version 14.0 | YEAR OF<br>ONSET | LCS12           | LCS16           | Total           |
|---------------------------------------------------------------------|------------------|-----------------|-----------------|-----------------|
| Acute tonsillitis                                                   | 1st year         | 8/1432 ( 0.6%)  | 1/1452 ( <0.1%) | 9/2884 ( 0.3%)  |
|                                                                     | 2nd year         | 1/1166 ( <0.1%) | 2/1206 ( 0.2%)  | 3/2372 ( 0.1%)  |
|                                                                     | 3rd year         | 1/ 963 ( 0.1%)  | 2/1012 ( 0.2%)  | 3/1975 ( 0.2%)  |
|                                                                     | Overall          | 10/1432 ( 0.7%) | 5/1452 ( 0.3%)  | 15/2884 ( 0.5%) |
|                                                                     |                  |                 |                 |                 |
| Anogenital warts                                                    | 1st year         | 8/1432 ( 0.6%)  | 4/1452 ( 0.3%)  | 12/2884 ( 0.4%) |
|                                                                     | 2nd year         | 3/1166 ( 0.3%)  | 3/1206 ( 0.2%)  | 6/2372 ( 0.3%)  |
|                                                                     | 3rd year         | 0/ 963          | 3/1012 ( 0.3%)  | 3/1975 ( 0.2%)  |
|                                                                     | Overall          | 11/1432 ( 0.8%) | 10/1452 ( 0.7%) | 21/2884 ( 0.7%) |
|                                                                     |                  |                 |                 |                 |
| Appendicitis                                                        | 1st year         | 4/1432 ( 0.3%)  | 2/1452 ( 0.1%)  | 6/2884 ( 0.2%)  |
|                                                                     | 2nd year         | 2/1166 ( 0.2%)  | 3/1206 ( 0.2%)  | 5/2372 ( 0.2%)  |
|                                                                     | 3rd year         | 0/ 963          | 2/1012 ( 0.2%)  | 2/1975 ( 0.1%)  |
|                                                                     | Overall          | 6/1432 ( 0.4%)  | 7/1452 ( 0.5%)  | 13/2884 ( 0.5%) |
|                                                                     |                  |                 |                 |                 |
| Arthritis rubella                                                   | 2nd year         | 1/1166 ( <0.1%) | 0/1206          | 1/2372 ( <0.1%) |
|                                                                     | Overall          | 1/1432 ( <0.1%) | 0/1452          | 1/2884 ( <0.1%) |
|                                                                     |                  |                 |                 |                 |
| Bartholin's abscess                                                 | 1st year         | 2/1432 ( 0.1%)  | 0/1452          | 2/2884 ( <0.1%) |
|                                                                     | 3rd year         | 1/ 963 ( 0.1%)  | 0/1012          | 1/1975 ( <0.1%) |
|                                                                     | Overall          | 3/1432 ( 0.2%)  | 0/1452          | 3/2884 ( 0.1%)  |
| Blastocystis infection                                              | 3rd year         | 0/ 963          | 1/1012 ( <0.1%) | 1/1975 ( <0.1%) |
|                                                                     | Overall          | 0/1432          | 1/1452 ( <0.1%) | 1/2884 ( <0.1%) |
|                                                                     |                  |                 |                 |                 |
| Body tinea                                                          | 1st year         | 1/1432 ( <0.1%) | 2/1452 ( 0.1%)  | 3/2884 ( 0.1%)  |
|                                                                     | 3rd year         | 1/ 963 ( 0.1%)  | 0/1012          | 1/1975 ( <0.1%) |
|                                                                     | Overall          | 2/1432 ( 0.1%)  | 2/1452 ( 0.1%)  | 4/2884 ( 0.1%)  |
| Breast abscess                                                      | 1st year         | 1/1432 ( <0.1%) | 0/1452          | 1/2884 ( <0.1%) |
|                                                                     | Overall          | 1/1432 ( <0.1%) | 0/1452          | 1/2884 ( <0.1%) |
|                                                                     |                  |                 |                 |                 |
| Bronchitis                                                          | 1st year         | 32/1432 ( 2.2%) | 21/1452 ( 1.4%) | 53/2884 ( 1.8%) |
|                                                                     | 2nd year         | 17/1166 ( 1.5%) | 15/1206 ( 1.2%) | 32/2372 ( 1.3%) |
|                                                                     | 3rd year         | 15/ 963 ( 1.6%) | 5/1012 ( 0.5%)  | 20/1975 ( 1.0%) |
|                                                                     | Overall          | 58/1432 ( 4.1%) | 38/1452 ( 2.6%) | 96/2884 ( 3.3%) |
|                                                                     |                  |                 |                 |                 |
| Bronchitis viral                                                    | 2nd year         | 1/1166 ( <0.1%) | 0/1206          | 1/2372 ( <0.1%) |
|                                                                     | Overall          | 1/1432 ( <0.1%) | 0/1452          | 1/2884 ( <0.1%) |

**Table 14.3.1 / 9: Number of subjects with adverse events by primary system organ class, preferred term and year (FAS)**

| Primary system organ class<br>Preferred term<br>MedDRA version 14.0 | YEAR OF<br>ONSET | YEAR OF         |                 | Total           |
|---------------------------------------------------------------------|------------------|-----------------|-----------------|-----------------|
|                                                                     |                  | LCS12           | LCS16           |                 |
| Bronchopneumonia                                                    | 1st year         | 1/1432 ( <0.1%) | 0/1452          | 1/2884 ( <0.1%) |
|                                                                     | Overall          | 1/1432 ( <0.1%) | 0/1452          | 1/2884 ( <0.1%) |
| Bursitis infective                                                  | 1st year         | 1/1432 ( <0.1%) | 0/1452          | 1/2884 ( <0.1%) |
|                                                                     | Overall          | 1/1432 ( <0.1%) | 0/1452          | 1/2884 ( <0.1%) |
| Campylobacter infection                                             | 1st year         | 1/1432 ( <0.1%) | 0/1452          | 1/2884 ( <0.1%) |
|                                                                     | Overall          | 1/1432 ( <0.1%) | 0/1452          | 1/2884 ( <0.1%) |
| Campylobacter intestinal infection                                  | 1st year         | 0/1432          | 1/1452 ( <0.1%) | 1/2884 ( <0.1%) |
|                                                                     | Overall          | 0/1432          | 1/1452 ( <0.1%) | 1/2884 ( <0.1%) |
| Candidiasis                                                         | 1st year         | 10/1432 ( 0.7%) | 5/1452 ( 0.3%)  | 15/2884 ( 0.5%) |
|                                                                     | 2nd year         | 2/1166 ( 0.2%)  | 2/1206 ( 0.2%)  | 4/2372 ( 0.2%)  |
|                                                                     | 3rd year         | 1/ 963 ( 0.1%)  | 2/1012 ( 0.2%)  | 3/1975 ( 0.2%)  |
|                                                                     | Overall          | 11/1432 ( 0.8%) | 9/1452 ( 0.6%)  | 20/2884 ( 0.7%) |
| Carbuncle                                                           | 1st year         | 0/1432          | 1/1452 ( <0.1%) | 1/2884 ( <0.1%) |
|                                                                     | Overall          | 0/1432          | 1/1452 ( <0.1%) | 1/2884 ( <0.1%) |
| Cellulitis                                                          | 1st year         | 1/1432 ( <0.1%) | 3/1452 ( 0.2%)  | 4/2884 ( 0.1%)  |
|                                                                     | 2nd year         | 1/1166 ( <0.1%) | 1/1206 ( <0.1%) | 2/2372 ( <0.1%) |
|                                                                     | 3rd year         | 1/ 963 ( 0.1%)  | 1/1012 ( <0.1%) | 2/1975 ( 0.1%)  |
|                                                                     | Overall          | 3/1432 ( 0.2%)  | 4/1452 ( 0.3%)  | 7/2884 ( 0.2%)  |
| Cervicitis                                                          | 1st year         | 2/1432 ( 0.1%)  | 11/1452 ( 0.8%) | 13/2884 ( 0.5%) |
|                                                                     | 2nd year         | 2/1166 ( 0.2%)  | 2/1206 ( 0.2%)  | 4/2372 ( 0.2%)  |
|                                                                     | 3rd year         | 1/ 963 ( 0.1%)  | 3/1012 ( 0.3%)  | 4/1975 ( 0.2%)  |
|                                                                     | Overall          | 5/1432 ( 0.3%)  | 15/1452 ( 1.0%) | 20/2884 ( 0.7%) |
| Cervicitis gonococcal                                               | 2nd year         | 1/1166 ( <0.1%) | 0/1206          | 1/2372 ( <0.1%) |
|                                                                     | Overall          | 1/1432 ( <0.1%) | 0/1452          | 1/2884 ( <0.1%) |
| Chlamydial cervicitis                                               | 1st year         | 1/1432 ( <0.1%) | 1/1452 ( <0.1%) | 2/2884 ( <0.1%) |
|                                                                     | 2nd year         | 1/1166 ( <0.1%) | 3/1206 ( 0.2%)  | 4/2372 ( 0.2%)  |
|                                                                     | 3rd year         | 0/ 963          | 2/1012 ( 0.2%)  | 2/1975 ( 0.1%)  |
|                                                                     | Overall          | 2/1432 ( 0.1%)  | 6/1452 ( 0.4%)  | 8/2884 ( 0.3%)  |

**Table 14.3.1 / 9: Number of subjects with adverse events by primary system organ class, preferred term and year (FAS)**

| Primary system organ class<br>Preferred term<br>MedDRA version 14.0 | YEAR OF<br>ONSET | LCS12           | LCS16           | Total           |
|---------------------------------------------------------------------|------------------|-----------------|-----------------|-----------------|
| Chlamydial infection                                                | 1st year         | 0/1432          | 2/1452 ( 0.1%)  | 2/2884 ( <0.1%) |
|                                                                     | 2nd year         | 1/1166 ( <0.1%) | 1/1206 ( <0.1%) | 2/2372 ( <0.1%) |
|                                                                     | 3rd year         | 0/ 963          | 1/1012 ( <0.1%) | 1/1975 ( <0.1%) |
|                                                                     | Overall          | 1/1432 ( <0.1%) | 4/1452 ( 0.3%)  | 5/2884 ( 0.2%)  |
| Chronic tonsillitis                                                 | 3rd year         | 0/ 963          | 1/1012 ( <0.1%) | 1/1975 ( <0.1%) |
|                                                                     | Overall          | 0/1432          | 1/1452 ( <0.1%) | 1/2884 ( <0.1%) |
| Clitoris abscess                                                    | 3rd year         | 1/ 963 ( 0.1%)  | 0/1012          | 1/1975 ( <0.1%) |
|                                                                     | Overall          | 1/1432 ( <0.1%) | 0/1452          | 1/2884 ( <0.1%) |
| Conjunctivitis bacterial                                            | 1st year         | 0/1432          | 1/1452 ( <0.1%) | 1/2884 ( <0.1%) |
|                                                                     | 2nd year         | 0/1166          | 1/1206 ( <0.1%) | 1/2372 ( <0.1%) |
|                                                                     | 3rd year         | 1/ 963 ( 0.1%)  | 0/1012          | 1/1975 ( <0.1%) |
|                                                                     | Overall          | 1/1432 ( <0.1%) | 2/1452 ( 0.1%)  | 3/2884 ( 0.1%)  |
| Conjunctivitis infective                                            | 1st year         | 2/1432 ( 0.1%)  | 0/1452          | 2/2884 ( <0.1%) |
|                                                                     | Overall          | 2/1432 ( 0.1%)  | 0/1452          | 2/2884 ( <0.1%) |
| Conjunctivitis viral                                                | 1st year         | 1/1432 ( <0.1%) | 1/1452 ( <0.1%) | 2/2884 ( <0.1%) |
|                                                                     | Overall          | 1/1432 ( <0.1%) | 1/1452 ( <0.1%) | 2/2884 ( <0.1%) |
| Coxsackie viral infection                                           | 1st year         | 1/1432 ( <0.1%) | 1/1452 ( <0.1%) | 2/2884 ( <0.1%) |
|                                                                     | 2nd year         | 1/1166 ( <0.1%) | 0/1206          | 1/2372 ( <0.1%) |
|                                                                     | Overall          | 2/1432 ( 0.1%)  | 1/1452 ( <0.1%) | 3/2884 ( 0.1%)  |
| Cystitis                                                            | 1st year         | 20/1432 ( 1.4%) | 13/1452 ( 0.9%) | 33/2884 ( 1.1%) |
|                                                                     | 2nd year         | 8/1166 ( 0.7%)  | 13/1206 ( 1.1%) | 21/2372 ( 0.9%) |
|                                                                     | 3rd year         | 6/ 963 ( 0.6%)  | 6/1012 ( 0.6%)  | 12/1975 ( 0.6%) |
|                                                                     | Overall          | 30/1432 ( 2.1%) | 26/1452 ( 1.8%) | 56/2884 ( 1.9%) |
| Dengue fever                                                        | 1st year         | 1/1432 ( <0.1%) | 0/1452          | 1/2884 ( <0.1%) |
|                                                                     | 2nd year         | 1/1166 ( <0.1%) | 0/1206          | 1/2372 ( <0.1%) |
|                                                                     | Overall          | 2/1432 ( 0.1%)  | 0/1452          | 2/2884 ( <0.1%) |
| Diarrhoea infectious                                                | 1st year         | 1/1432 ( <0.1%) | 1/1452 ( <0.1%) | 2/2884 ( <0.1%) |
|                                                                     | 3rd year         | 0/ 963          | 1/1012 ( <0.1%) | 1/1975 ( <0.1%) |
|                                                                     | Overall          | 1/1432 ( <0.1%) | 2/1452 ( 0.1%)  | 3/2884 ( 0.1%)  |

**Table 14.3.1 / 9: Number of subjects with adverse events by primary system organ class, preferred term and year (FAS)**

| Primary system organ class<br>Preferred term<br>MedDRA version 14.0 | YEAR OF<br>ONSET | LCS12           | LCS16           | Total           |
|---------------------------------------------------------------------|------------------|-----------------|-----------------|-----------------|
| Diverticulitis                                                      | 1st year         | 1/1432 ( <0.1%) | 0/1452          | 1/2884 ( <0.1%) |
|                                                                     | 2nd year         | 1/1166 ( <0.1%) | 1/1206 ( <0.1%) | 2/2372 ( <0.1%) |
|                                                                     | Overall          | 1/1432 ( <0.1%) | 1/1452 ( <0.1%) | 2/2884 ( <0.1%) |
| Ear infection                                                       | 1st year         | 15/1432 ( 1.0%) | 7/1452 ( 0.5%)  | 22/2884 ( 0.8%) |
|                                                                     | 2nd year         | 9/1166 ( 0.8%)  | 5/1206 ( 0.4%)  | 14/2372 ( 0.6%) |
|                                                                     | 3rd year         | 6/ 963 ( 0.6%)  | 3/1012 ( 0.3%)  | 9/1975 ( 0.5%)  |
|                                                                     | Overall          | 27/1432 ( 1.9%) | 13/1452 ( 0.9%) | 40/2884 ( 1.4%) |
| Ear infection bacterial                                             | 1st year         | 1/1432 ( <0.1%) | 0/1452          | 1/2884 ( <0.1%) |
|                                                                     | Overall          | 1/1432 ( <0.1%) | 0/1452          | 1/2884 ( <0.1%) |
| Endometritis                                                        | 1st year         | 9/1432 ( 0.6%)  | 9/1452 ( 0.6%)  | 18/2884 ( 0.6%) |
|                                                                     | 2nd year         | 1/1166 ( <0.1%) | 3/1206 ( 0.2%)  | 4/2372 ( 0.2%)  |
|                                                                     | 3rd year         | 2/ 963 ( 0.2%)  | 0/1012          | 2/1975 ( 0.1%)  |
|                                                                     | Overall          | 11/1432 ( 0.8%) | 11/1452 ( 0.8%) | 22/2884 ( 0.8%) |
| Enterobiasis                                                        | 1st year         | 0/1432          | 1/1452 ( <0.1%) | 1/2884 ( <0.1%) |
|                                                                     | 2nd year         | 1/1166 ( <0.1%) | 0/1206          | 1/2372 ( <0.1%) |
|                                                                     | 3rd year         | 2/ 963 ( 0.2%)  | 0/1012          | 2/1975 ( 0.1%)  |
|                                                                     | Overall          | 3/1432 ( 0.2%)  | 1/1452 ( <0.1%) | 4/2884 ( 0.1%)  |
| Enterocolitis infectious                                            | 1st year         | 1/1432 ( <0.1%) | 0/1452          | 1/2884 ( <0.1%) |
|                                                                     | 2nd year         | 1/1166 ( <0.1%) | 0/1206          | 1/2372 ( <0.1%) |
|                                                                     | Overall          | 2/1432 ( 0.1%)  | 0/1452          | 2/2884 ( <0.1%) |
| Epstein-Barr virus infection                                        | 1st year         | 0/1432          | 1/1452 ( <0.1%) | 1/2884 ( <0.1%) |
|                                                                     | Overall          | 0/1432          | 1/1452 ( <0.1%) | 1/2884 ( <0.1%) |
| Erysipelas                                                          | 2nd year         | 1/1166 ( <0.1%) | 0/1206          | 1/2372 ( <0.1%) |
|                                                                     | Overall          | 1/1432 ( <0.1%) | 0/1452          | 1/2884 ( <0.1%) |
| Erythema infectiosum                                                | 2nd year         | 1/1166 ( <0.1%) | 0/1206          | 1/2372 ( <0.1%) |
|                                                                     | Overall          | 1/1432 ( <0.1%) | 0/1452          | 1/2884 ( <0.1%) |
| Escherichia urinary tract infection                                 | 1st year         | 0/1432          | 1/1452 ( <0.1%) | 1/2884 ( <0.1%) |
|                                                                     | Overall          | 0/1432          | 1/1452 ( <0.1%) | 1/2884 ( <0.1%) |
| Escherichia vaginitis                                               | 1st year         | 1/1432 ( <0.1%) | 0/1452          | 1/2884 ( <0.1%) |
|                                                                     | Overall          | 1/1432 ( <0.1%) | 0/1452          | 1/2884 ( <0.1%) |

**Table 14.3.1 / 9: Number of subjects with adverse events by primary system organ class, preferred term and year (FAS)**

| Primary system organ class<br>Preferred term<br>MedDRA version 14.0 | YEAR OF<br>ONSET | LCS             |                 | Total           |
|---------------------------------------------------------------------|------------------|-----------------|-----------------|-----------------|
|                                                                     |                  | LCS12           | LCS16           |                 |
| Eye infection                                                       | 3rd year         | 0/ 963          | 1/1012 ( <0.1%) | 1/1975 ( <0.1%) |
|                                                                     | Overall          | 0/1432          | 1/1452 ( <0.1%) | 1/2884 ( <0.1%) |
| Eyelid infection                                                    | 2nd year         | 1/1166 ( <0.1%) | 0/1206          | 1/2372 ( <0.1%) |
|                                                                     | Overall          | 1/1432 ( <0.1%) | 0/1452          | 1/2884 ( <0.1%) |
| Folliculitis                                                        | 1st year         | 4/1432 ( 0.3%)  | 2/1452 ( 0.1%)  | 6/2884 ( 0.2%)  |
|                                                                     | 2nd year         | 1/1166 ( <0.1%) | 0/1206          | 1/2372 ( <0.1%) |
|                                                                     | 3rd year         | 0/ 963          | 4/1012 ( 0.4%)  | 4/1975 ( 0.2%)  |
|                                                                     | Overall          | 5/1432 ( 0.3%)  | 6/1452 ( 0.4%)  | 11/2884 ( 0.4%) |
| Fungal infection                                                    | 1st year         | 5/1432 ( 0.3%)  | 6/1452 ( 0.4%)  | 11/2884 ( 0.4%) |
|                                                                     | 2nd year         | 0/1166          | 2/1206 ( 0.2%)  | 2/2372 ( <0.1%) |
|                                                                     | 3rd year         | 0/ 963          | 1/1012 ( <0.1%) | 1/1975 ( <0.1%) |
|                                                                     | Overall          | 5/1432 ( 0.3%)  | 8/1452 ( 0.6%)  | 13/2884 ( 0.5%) |
| Fungal skin infection                                               | 1st year         | 1/1432 ( <0.1%) | 0/1452          | 1/2884 ( <0.1%) |
|                                                                     | 2nd year         | 2/1166 ( 0.2%)  | 1/1206 ( <0.1%) | 3/2372 ( 0.1%)  |
|                                                                     | Overall          | 3/1432 ( 0.2%)  | 1/1452 ( <0.1%) | 4/2884 ( 0.1%)  |
| Furuncle                                                            | 1st year         | 1/1432 ( <0.1%) | 1/1452 ( <0.1%) | 2/2884 ( <0.1%) |
|                                                                     | Overall          | 1/1432 ( <0.1%) | 1/1452 ( <0.1%) | 2/2884 ( <0.1%) |
| Gastritis bacterial                                                 | 1st year         | 0/1432          | 1/1452 ( <0.1%) | 1/2884 ( <0.1%) |
|                                                                     | Overall          | 0/1432          | 1/1452 ( <0.1%) | 1/2884 ( <0.1%) |
| Gastritis viral                                                     | 1st year         | 0/1432          | 1/1452 ( <0.1%) | 1/2884 ( <0.1%) |
|                                                                     | Overall          | 0/1432          | 1/1452 ( <0.1%) | 1/2884 ( <0.1%) |
| Gastroenteritis                                                     | 1st year         | 19/1432 ( 1.3%) | 16/1452 ( 1.1%) | 35/2884 ( 1.2%) |
|                                                                     | 2nd year         | 9/1166 ( 0.8%)  | 6/1206 ( 0.5%)  | 15/2372 ( 0.6%) |
|                                                                     | 3rd year         | 6/ 963 ( 0.6%)  | 7/1012 ( 0.7%)  | 13/1975 ( 0.7%) |
|                                                                     | Overall          | 31/1432 ( 2.2%) | 29/1452 ( 2.0%) | 60/2884 ( 2.1%) |
| Gastroenteritis rotavirus                                           | 1st year         | 0/1432          | 1/1452 ( <0.1%) | 1/2884 ( <0.1%) |
|                                                                     | Overall          | 0/1432          | 1/1452 ( <0.1%) | 1/2884 ( <0.1%) |

**Table 14.3.1 / 9: Number of subjects with adverse events by primary system organ class, preferred term and year (FAS)**

| Primary system organ class<br>Preferred term<br>MedDRA version 14.0 | YEAR OF<br>ONSET | LCS12           | LCS16           | Total           |
|---------------------------------------------------------------------|------------------|-----------------|-----------------|-----------------|
| Gastroenteritis viral                                               | 1st year         | 5/1432 ( 0.3%)  | 4/1452 ( 0.3%)  | 9/2884 ( 0.3%)  |
|                                                                     | 2nd year         | 0/1166          | 4/1206 ( 0.3%)  | 4/2372 ( 0.2%)  |
|                                                                     | 3rd year         | 3/ 963 ( 0.3%)  | 1/1012 (<0.1%)  | 4/1975 ( 0.2%)  |
|                                                                     | Overall          | 7/1432 ( 0.5%)  | 8/1452 ( 0.6%)  | 15/2884 ( 0.5%) |
| Gastrointestinal bacterial infection                                | 1st year         | 0/1432          | 1/1452 (<0.1%)  | 1/2884 (<0.1%)  |
|                                                                     | Overall          | 0/1432          | 1/1452 (<0.1%)  | 1/2884 (<0.1%)  |
| Gastrointestinal viral infection                                    | 1st year         | 1/1432 (<0.1%)  | 0/1452          | 1/2884 (<0.1%)  |
|                                                                     | 2nd year         | 0/1166          | 1/1206 (<0.1%)  | 1/2372 (<0.1%)  |
|                                                                     | 3rd year         | 0/ 963          | 1/1012 (<0.1%)  | 1/1975 (<0.1%)  |
|                                                                     | Overall          | 1/1432 (<0.1%)  | 2/1452 ( 0.1%)  | 3/2884 ( 0.1%)  |
| Genital candidiasis                                                 | 1st year         | 1/1432 (<0.1%)  | 2/1452 ( 0.1%)  | 3/2884 ( 0.1%)  |
|                                                                     | 2nd year         | 0/1166          | 1/1206 (<0.1%)  | 1/2372 (<0.1%)  |
|                                                                     | Overall          | 1/1432 (<0.1%)  | 3/1452 ( 0.2%)  | 4/2884 ( 0.1%)  |
| Genital herpes                                                      | 1st year         | 4/1432 ( 0.3%)  | 8/1452 ( 0.6%)  | 12/2884 ( 0.4%) |
|                                                                     | 2nd year         | 4/1166 ( 0.3%)  | 3/1206 ( 0.2%)  | 7/2372 ( 0.3%)  |
|                                                                     | 3rd year         | 4/ 963 ( 0.4%)  | 4/1012 ( 0.4%)  | 8/1975 ( 0.4%)  |
|                                                                     | Overall          | 10/1432 ( 0.7%) | 14/1452 ( 1.0%) | 24/2884 ( 0.8%) |
| Genital infection fungal                                            | 1st year         | 1/1432 (<0.1%)  | 0/1452          | 1/2884 (<0.1%)  |
|                                                                     | Overall          | 1/1432 (<0.1%)  | 0/1452          | 1/2884 (<0.1%)  |
| Giardiasis                                                          | 2nd year         | 1/1166 (<0.1%)  | 0/1206          | 1/2372 (<0.1%)  |
|                                                                     | Overall          | 1/1432 (<0.1%)  | 0/1452          | 1/2884 (<0.1%)  |
| Gonorrhoea                                                          | 1st year         | 0/1432          | 1/1452 (<0.1%)  | 1/2884 (<0.1%)  |
|                                                                     | 2nd year         | 1/1166 (<0.1%)  | 0/1206          | 1/2372 (<0.1%)  |
|                                                                     | Overall          | 1/1432 (<0.1%)  | 1/1452 (<0.1%)  | 2/2884 (<0.1%)  |
| Groin infection                                                     | 1st year         | 1/1432 (<0.1%)  | 0/1452          | 1/2884 (<0.1%)  |
|                                                                     | 2nd year         | 1/1166 (<0.1%)  | 0/1206          | 1/2372 (<0.1%)  |
|                                                                     | Overall          | 2/1432 ( 0.1%)  | 0/1452          | 2/2884 (<0.1%)  |
| Gynaecological chlamydia infection                                  | 1st year         | 3/1432 ( 0.2%)  | 2/1452 ( 0.1%)  | 5/2884 ( 0.2%)  |
|                                                                     | 2nd year         | 0/1166          | 2/1206 ( 0.2%)  | 2/2372 (<0.1%)  |
|                                                                     | 3rd year         | 0/ 963          | 2/1012 ( 0.2%)  | 2/1975 ( 0.1%)  |
|                                                                     | Overall          | 3/1432 ( 0.2%)  | 5/1452 ( 0.3%)  | 8/2884 ( 0.3%)  |

**Table 14.3.1 / 9: Number of subjects with adverse events by primary system organ class, preferred term and year (FAS)**

| Primary system organ class<br>Preferred term<br>MedDRA version 14.0 | YEAR OF<br>ONSET | LCS12          | LCS16          | Total           |
|---------------------------------------------------------------------|------------------|----------------|----------------|-----------------|
| H1N1 influenza                                                      | 2nd year         | 7/1166 ( 0.6%) | 5/1206 ( 0.4%) | 12/2372 ( 0.5%) |
|                                                                     | Overall          | 7/1432 ( 0.5%) | 5/1452 ( 0.3%) | 12/2884 ( 0.4%) |
| Haemophilus infection                                               | 1st year         | 0/1432         | 1/1452 (<0.1%) | 1/2884 (<0.1%)  |
|                                                                     | Overall          | 0/1432         | 1/1452 (<0.1%) | 1/2884 (<0.1%)  |
| Hand-foot-and-mouth disease                                         | 3rd year         | 0/ 963         | 1/1012 (<0.1%) | 1/1975 (<0.1%)  |
|                                                                     | Overall          | 0/1432         | 1/1452 (<0.1%) | 1/2884 (<0.1%)  |
| Helicobacter gastritis                                              | 2nd year         | 1/1166 (<0.1%) | 1/1206 (<0.1%) | 2/2372 (<0.1%)  |
|                                                                     | Overall          | 1/1432 (<0.1%) | 1/1452 (<0.1%) | 2/2884 (<0.1%)  |
| Helicobacter infection                                              | 1st year         | 1/1432 (<0.1%) | 0/1452         | 1/2884 (<0.1%)  |
|                                                                     | Overall          | 1/1432 (<0.1%) | 0/1452         | 1/2884 (<0.1%)  |
| Herpes dermatitis                                                   | 1st year         | 0/1432         | 1/1452 (<0.1%) | 1/2884 (<0.1%)  |
|                                                                     | 2nd year         | 1/1166 (<0.1%) | 0/1206         | 1/2372 (<0.1%)  |
|                                                                     | 3rd year         | 1/ 963 ( 0.1%) | 0/1012         | 1/1975 (<0.1%)  |
|                                                                     | Overall          | 1/1432 (<0.1%) | 1/1452 (<0.1%) | 2/2884 (<0.1%)  |
| Herpes simplex                                                      | 2nd year         | 0/1166         | 2/1206 ( 0.2%) | 2/2372 (<0.1%)  |
|                                                                     | 3rd year         | 1/ 963 ( 0.1%) | 1/1012 (<0.1%) | 2/1975 ( 0.1%)  |
|                                                                     | Overall          | 1/1432 (<0.1%) | 3/1452 ( 0.2%) | 4/2884 ( 0.1%)  |
| Herpes zoster                                                       | 1st year         | 3/1432 ( 0.2%) | 1/1452 (<0.1%) | 4/2884 ( 0.1%)  |
|                                                                     | 2nd year         | 3/1166 ( 0.3%) | 2/1206 ( 0.2%) | 5/2372 ( 0.2%)  |
|                                                                     | 3rd year         | 1/ 963 ( 0.1%) | 1/1012 (<0.1%) | 2/1975 ( 0.1%)  |
|                                                                     | Overall          | 7/1432 ( 0.5%) | 4/1452 ( 0.3%) | 11/2884 ( 0.4%) |
| Impetigo                                                            | 1st year         | 1/1432 (<0.1%) | 1/1452 (<0.1%) | 2/2884 (<0.1%)  |
|                                                                     | 2nd year         | 2/1166 ( 0.2%) | 1/1206 (<0.1%) | 3/2372 ( 0.1%)  |
|                                                                     | 3rd year         | 1/ 963 ( 0.1%) | 0/1012         | 1/1975 (<0.1%)  |
|                                                                     | Overall          | 4/1432 ( 0.3%) | 2/1452 ( 0.1%) | 6/2884 ( 0.2%)  |
| Infected bites                                                      | 1st year         | 1/1432 (<0.1%) | 0/1452         | 1/2884 (<0.1%)  |
|                                                                     | 2nd year         | 1/1166 (<0.1%) | 0/1206         | 1/2372 (<0.1%)  |
|                                                                     | Overall          | 2/1432 ( 0.1%) | 0/1452         | 2/2884 (<0.1%)  |
| Infected cyst                                                       | 2nd year         | 0/1166         | 1/1206 (<0.1%) | 1/2372 (<0.1%)  |
|                                                                     | Overall          | 0/1432         | 1/1452 (<0.1%) | 1/2884 (<0.1%)  |



**Table 14.3.1 / 9: Number of subjects with adverse events by primary system organ class, preferred term and year (FAS)**

| Primary system organ class<br>Preferred term<br>MedDRA version 14.0 | YEAR OF<br>ONSET | LCS12           | LCS16           | Total            |
|---------------------------------------------------------------------|------------------|-----------------|-----------------|------------------|
| Infection                                                           | 2nd year         | 0/1166          | 1/1206 ( <0.1%) | 1/2372 ( <0.1%)  |
|                                                                     | Overall          | 0/1432          | 1/1452 ( <0.1%) | 1/2884 ( <0.1%)  |
| Infectious mononucleosis                                            | 1st year         | 0/1432          | 2/1452 ( 0.1%)  | 2/2884 ( <0.1%)  |
|                                                                     | 2nd year         | 1/1166 ( <0.1%) | 4/1206 ( 0.3%)  | 5/2372 ( 0.2%)   |
|                                                                     | Overall          | 1/1432 ( <0.1%) | 6/1452 ( 0.4%)  | 7/2884 ( 0.2%)   |
| Influenza                                                           | 1st year         | 46/1432 ( 3.2%) | 59/1452 ( 4.1%) | 105/2884 ( 3.6%) |
|                                                                     | 2nd year         | 27/1166 ( 2.3%) | 32/1206 ( 2.7%) | 59/2372 ( 2.5%)  |
|                                                                     | 3rd year         | 14/ 963 ( 1.5%) | 14/1012 ( 1.4%) | 28/1975 ( 1.4%)  |
|                                                                     | Overall          | 72/1432 ( 5.0%) | 94/1452 ( 6.5%) | 166/2884 ( 5.8%) |
| Keratitis viral                                                     | 1st year         | 0/1432          | 1/1452 ( <0.1%) | 1/2884 ( <0.1%)  |
|                                                                     | Overall          | 0/1432          | 1/1452 ( <0.1%) | 1/2884 ( <0.1%)  |
| Kidney infection                                                    | 1st year         | 1/1432 ( <0.1%) | 1/1452 ( <0.1%) | 2/2884 ( <0.1%)  |
|                                                                     | 2nd year         | 1/1166 ( <0.1%) | 3/1206 ( 0.2%)  | 4/2372 ( 0.2%)   |
|                                                                     | Overall          | 2/1432 ( 0.1%)  | 4/1452 ( 0.3%)  | 6/2884 ( 0.2%)   |
| Labyrinthitis                                                       | 1st year         | 0/1432          | 1/1452 ( <0.1%) | 1/2884 ( <0.1%)  |
|                                                                     | 3rd year         | 1/ 963 ( 0.1%)  | 0/1012          | 1/1975 ( <0.1%)  |
|                                                                     | Overall          | 1/1432 ( <0.1%) | 1/1452 ( <0.1%) | 2/2884 ( <0.1%)  |
| Laryngitis                                                          | 1st year         | 1/1432 ( <0.1%) | 5/1452 ( 0.3%)  | 6/2884 ( 0.2%)   |
|                                                                     | 2nd year         | 5/1166 ( 0.4%)  | 4/1206 ( 0.3%)  | 9/2372 ( 0.4%)   |
|                                                                     | 3rd year         | 1/ 963 ( 0.1%)  | 2/1012 ( 0.2%)  | 3/1975 ( 0.2%)   |
|                                                                     | Overall          | 7/1432 ( 0.5%)  | 10/1452 ( 0.7%) | 17/2884 ( 0.6%)  |
| Laryngitis bacterial                                                | 1st year         | 0/1432          | 1/1452 ( <0.1%) | 1/2884 ( <0.1%)  |
|                                                                     | Overall          | 0/1432          | 1/1452 ( <0.1%) | 1/2884 ( <0.1%)  |
| Localised infection                                                 | 1st year         | 1/1432 ( <0.1%) | 2/1452 ( 0.1%)  | 3/2884 ( 0.1%)   |
|                                                                     | 2nd year         | 2/1166 ( 0.2%)  | 0/1206          | 2/2372 ( <0.1%)  |
|                                                                     | 3rd year         | 1/ 963 ( 0.1%)  | 0/1012          | 1/1975 ( <0.1%)  |
|                                                                     | Overall          | 4/1432 ( 0.3%)  | 2/1452 ( 0.1%)  | 6/2884 ( 0.2%)   |
| Lower respiratory tract infection                                   | 1st year         | 2/1432 ( 0.1%)  | 0/1452          | 2/2884 ( <0.1%)  |
|                                                                     | 2nd year         | 1/1166 ( <0.1%) | 1/1206 ( <0.1%) | 2/2372 ( <0.1%)  |
|                                                                     | Overall          | 3/1432 ( 0.2%)  | 1/1452 ( <0.1%) | 4/2884 ( 0.1%)   |

**Table 14.3.1 / 9: Number of subjects with adverse events by primary system organ class, preferred term and year (FAS)**

| Primary system organ class<br>Preferred term<br>MedDRA version 14.0 | YEAR OF<br>ONSET | LCS12            |  | LCS16            |  | Total            |
|---------------------------------------------------------------------|------------------|------------------|--|------------------|--|------------------|
|                                                                     |                  |                  |  |                  |  |                  |
| Lower respiratory tract infection bacterial                         | 3rd year         | 1/ 963 ( 0.1%)   |  | 0/1012           |  | 1/1975 ( <0.1%)  |
|                                                                     | Overall          | 1/1432 ( <0.1%)  |  | 0/1452           |  | 1/2884 ( <0.1%)  |
| Lymph gland infection                                               | 3rd year         | 1/ 963 ( 0.1%)   |  | 0/1012           |  | 1/1975 ( <0.1%)  |
|                                                                     | Overall          | 1/1432 ( <0.1%)  |  | 0/1452           |  | 1/2884 ( <0.1%)  |
| Malaria                                                             | 1st year         | 1/1432 ( <0.1%)  |  | 0/1452           |  | 1/2884 ( <0.1%)  |
|                                                                     | 2nd year         | 0/1166           |  | 1/1206 ( <0.1%)  |  | 1/2372 ( <0.1%)  |
|                                                                     | Overall          | 1/1432 ( <0.1%)  |  | 1/1452 ( <0.1%)  |  | 2/2884 ( <0.1%)  |
| Mastitis                                                            | 1st year         | 1/1432 ( <0.1%)  |  | 1/1452 ( <0.1%)  |  | 2/2884 ( <0.1%)  |
|                                                                     | 3rd year         | 2/ 963 ( 0.2%)   |  | 0/1012           |  | 2/1975 ( 0.1%)   |
|                                                                     | Overall          | 3/1432 ( 0.2%)   |  | 1/1452 ( <0.1%)  |  | 4/2884 ( 0.1%)   |
| Meningitis                                                          | 1st year         | 1/1432 ( <0.1%)  |  | 0/1452           |  | 1/2884 ( <0.1%)  |
|                                                                     | Overall          | 1/1432 ( <0.1%)  |  | 0/1452           |  | 1/2884 ( <0.1%)  |
| Meningitis viral                                                    | 3rd year         | 0/ 963           |  | 1/1012 ( <0.1%)  |  | 1/1975 ( <0.1%)  |
|                                                                     | Overall          | 0/1432           |  | 1/1452 ( <0.1%)  |  | 1/2884 ( <0.1%)  |
| Molluscum contagiosum                                               | 3rd year         | 0/ 963           |  | 1/1012 ( <0.1%)  |  | 1/1975 ( <0.1%)  |
|                                                                     | Overall          | 0/1432           |  | 1/1452 ( <0.1%)  |  | 1/2884 ( <0.1%)  |
| Nail infection                                                      | 1st year         | 1/1432 ( <0.1%)  |  | 1/1452 ( <0.1%)  |  | 2/2884 ( <0.1%)  |
|                                                                     | 3rd year         | 1/ 963 ( 0.1%)   |  | 0/1012           |  | 1/1975 ( <0.1%)  |
|                                                                     | Overall          | 2/1432 ( 0.1%)   |  | 1/1452 ( <0.1%)  |  | 3/2884 ( 0.1%)   |
| Nasopharyngitis                                                     | 1st year         | 70/1432 ( 4.9%)  |  | 73/1452 ( 5.0%)  |  | 143/2884 ( 5.0%) |
|                                                                     | 2nd year         | 35/1166 ( 3.0%)  |  | 36/1206 ( 3.0%)  |  | 71/2372 ( 3.0%)  |
|                                                                     | 3rd year         | 21/ 963 ( 2.2%)  |  | 24/1012 ( 2.4%)  |  | 45/1975 ( 2.3%)  |
|                                                                     | Overall          | 103/1432 ( 7.2%) |  | 109/1452 ( 7.5%) |  | 212/2884 ( 7.4%) |
| Nipple infection                                                    | 3rd year         | 0/ 963           |  | 1/1012 ( <0.1%)  |  | 1/1975 ( <0.1%)  |
|                                                                     | Overall          | 0/1432           |  | 1/1452 ( <0.1%)  |  | 1/2884 ( <0.1%)  |
| Omphalitis                                                          | 1st year         | 0/1432           |  | 1/1452 ( <0.1%)  |  | 1/2884 ( <0.1%)  |
|                                                                     | Overall          | 0/1432           |  | 1/1452 ( <0.1%)  |  | 1/2884 ( <0.1%)  |

**Table 14.3.1 / 9: Number of subjects with adverse events by primary system organ class, preferred term and year (FAS)**

| Primary system organ class<br>Preferred term<br>MedDRA version 14.0 | YEAR OF<br>ONSET | LCS12           | LCS16           | Total           |
|---------------------------------------------------------------------|------------------|-----------------|-----------------|-----------------|
| Onychomycosis                                                       | 1st year         | 2/1432 ( 0.1%)  | 2/1452 ( 0.1%)  | 4/2884 ( 0.1%)  |
|                                                                     | 2nd year         | 0/1166          | 2/1206 ( 0.2%)  | 2/2372 ( <0.1%) |
|                                                                     | 3rd year         | 1/ 963 ( 0.1%)  | 0/1012          | 1/1975 ( <0.1%) |
|                                                                     | Overall          | 3/1432 ( 0.2%)  | 4/1452 ( 0.3%)  | 7/2884 ( 0.2%)  |
| Oophoritis                                                          | 1st year         | 0/1432          | 1/1452 ( <0.1%) | 1/2884 ( <0.1%) |
|                                                                     | Overall          | 0/1432          | 1/1452 ( <0.1%) | 1/2884 ( <0.1%) |
| Oral candidiasis                                                    | 2nd year         | 0/1166          | 1/1206 ( <0.1%) | 1/2372 ( <0.1%) |
|                                                                     | Overall          | 0/1432          | 1/1452 ( <0.1%) | 1/2884 ( <0.1%) |
| Oral herpes                                                         | 1st year         | 6/1432 ( 0.4%)  | 3/1452 ( 0.2%)  | 9/2884 ( 0.3%)  |
|                                                                     | 2nd year         | 3/1166 ( 0.3%)  | 4/1206 ( 0.3%)  | 7/2372 ( 0.3%)  |
|                                                                     | 3rd year         | 3/ 963 ( 0.3%)  | 4/1012 ( 0.4%)  | 7/1975 ( 0.4%)  |
|                                                                     | Overall          | 11/1432 ( 0.8%) | 10/1452 ( 0.7%) | 21/2884 ( 0.7%) |
| Osteomyelitis                                                       | 1st year         | 0/1432          | 1/1452 ( <0.1%) | 1/2884 ( <0.1%) |
|                                                                     | 2nd year         | 0/1166          | 1/1206 ( <0.1%) | 1/2372 ( <0.1%) |
|                                                                     | Overall          | 0/1432          | 1/1452 ( <0.1%) | 1/2884 ( <0.1%) |
| Otitis externa                                                      | 2nd year         | 0/1166          | 2/1206 ( 0.2%)  | 2/2372 ( <0.1%) |
|                                                                     | 3rd year         | 0/ 963          | 2/1012 ( 0.2%)  | 2/1975 ( 0.1%)  |
|                                                                     | Overall          | 0/1432          | 3/1452 ( 0.2%)  | 3/2884 ( 0.1%)  |
| Otitis media                                                        | 1st year         | 3/1432 ( 0.2%)  | 3/1452 ( 0.2%)  | 6/2884 ( 0.2%)  |
|                                                                     | 2nd year         | 1/1166 ( <0.1%) | 3/1206 ( 0.2%)  | 4/2372 ( 0.2%)  |
|                                                                     | 3rd year         | 2/ 963 ( 0.2%)  | 1/1012 ( <0.1%) | 3/1975 ( 0.2%)  |
|                                                                     | Overall          | 5/1432 ( 0.3%)  | 6/1452 ( 0.4%)  | 11/2884 ( 0.4%) |
| Otitis media acute                                                  | 1st year         | 0/1432          | 1/1452 ( <0.1%) | 1/2884 ( <0.1%) |
|                                                                     | Overall          | 0/1432          | 1/1452 ( <0.1%) | 1/2884 ( <0.1%) |
| Papilloma viral infection                                           | 1st year         | 2/1432 ( 0.1%)  | 1/1452 ( <0.1%) | 3/2884 ( 0.1%)  |
|                                                                     | Overall          | 2/1432 ( 0.1%)  | 1/1452 ( <0.1%) | 3/2884 ( 0.1%)  |
| Parasitic gastroenteritis                                           | 1st year         | 1/1432 ( <0.1%) | 0/1452          | 1/2884 ( <0.1%) |
|                                                                     | Overall          | 1/1432 ( <0.1%) | 0/1452          | 1/2884 ( <0.1%) |

**Table 14.3.1 / 9: Number of subjects with adverse events by primary system organ class, preferred term and year (FAS)**

| Primary system organ class<br>Preferred term<br>MedDRA version 14.0 | YEAR OF<br>ONSET | LCS12           | LCS16           | Total           |
|---------------------------------------------------------------------|------------------|-----------------|-----------------|-----------------|
| Paronychia                                                          | 1st year         | 0/1432          | 1/1452 ( <0.1%) | 1/2884 ( <0.1%) |
|                                                                     | 2nd year         | 1/1166 ( <0.1%) | 1/1206 ( <0.1%) | 2/2372 ( <0.1%) |
|                                                                     | Overall          | 1/1432 ( <0.1%) | 2/1452 ( 0.1%)  | 3/2884 ( 0.1%)  |
| Pelvic infection                                                    | 1st year         | 0/1432          | 1/1452 ( <0.1%) | 1/2884 ( <0.1%) |
|                                                                     | Overall          | 0/1432          | 1/1452 ( <0.1%) | 1/2884 ( <0.1%) |
| Pelvic inflammatory disease                                         | 1st year         | 2/1432 ( 0.1%)  | 4/1452 ( 0.3%)  | 6/2884 ( 0.2%)  |
|                                                                     | 2nd year         | 1/1166 ( <0.1%) | 0/1206          | 1/2372 ( <0.1%) |
|                                                                     | 3rd year         | 2/ 963 ( 0.2%)  | 1/1012 ( <0.1%) | 3/1975 ( 0.2%)  |
|                                                                     | Overall          | 5/1432 ( 0.3%)  | 5/1452 ( 0.3%)  | 10/2884 ( 0.3%) |
| Peritoneal abscess                                                  | 2nd year         | 1/1166 ( <0.1%) | 0/1206          | 1/2372 ( <0.1%) |
|                                                                     | Overall          | 1/1432 ( <0.1%) | 0/1452          | 1/2884 ( <0.1%) |
| Peritonsillar abscess                                               | 1st year         | 2/1432 ( 0.1%)  | 1/1452 ( <0.1%) | 3/2884 ( 0.1%)  |
|                                                                     | Overall          | 2/1432 ( 0.1%)  | 1/1452 ( <0.1%) | 3/2884 ( 0.1%)  |
| Pharyngeal abscess                                                  | 3rd year         | 1/ 963 ( 0.1%)  | 0/1012          | 1/1975 ( <0.1%) |
|                                                                     | Overall          | 1/1432 ( <0.1%) | 0/1452          | 1/2884 ( <0.1%) |
| Pharyngitis                                                         | 1st year         | 8/1432 ( 0.6%)  | 14/1452 ( 1.0%) | 22/2884 ( 0.8%) |
|                                                                     | 2nd year         | 3/1166 ( 0.3%)  | 4/1206 ( 0.3%)  | 7/2372 ( 0.3%)  |
|                                                                     | 3rd year         | 2/ 963 ( 0.2%)  | 4/1012 ( 0.4%)  | 6/1975 ( 0.3%)  |
|                                                                     | Overall          | 13/1432 ( 0.9%) | 21/1452 ( 1.4%) | 34/2884 ( 1.2%) |
| Pharyngitis streptococcal                                           | 1st year         | 11/1432 ( 0.8%) | 12/1452 ( 0.8%) | 23/2884 ( 0.8%) |
|                                                                     | 2nd year         | 6/1166 ( 0.5%)  | 5/1206 ( 0.4%)  | 11/2372 ( 0.5%) |
|                                                                     | 3rd year         | 7/ 963 ( 0.7%)  | 5/1012 ( 0.5%)  | 12/1975 ( 0.6%) |
|                                                                     | Overall          | 23/1432 ( 1.6%) | 21/1452 ( 1.4%) | 44/2884 ( 1.5%) |
| Pharyngotonsillitis                                                 | 3rd year         | 1/ 963 ( 0.1%)  | 0/1012          | 1/1975 ( <0.1%) |
|                                                                     | Overall          | 1/1432 ( <0.1%) | 0/1452          | 1/2884 ( <0.1%) |
| Pilonidal cyst                                                      | 2nd year         | 1/1166 ( <0.1%) | 0/1206          | 1/2372 ( <0.1%) |
|                                                                     | Overall          | 1/1432 ( <0.1%) | 0/1452          | 1/2884 ( <0.1%) |

**Table 14.3.1 / 9: Number of subjects with adverse events by primary system organ class, preferred term and year (FAS)**

| Primary system organ class<br>Preferred term<br>MedDRA version 14.0 | YEAR OF<br>ONSET | LCS12           | LCS16           | Total           |
|---------------------------------------------------------------------|------------------|-----------------|-----------------|-----------------|
| Pneumonia                                                           | 1st year         | 7/1432 ( 0.5%)  | 6/1452 ( 0.4%)  | 13/2884 ( 0.5%) |
|                                                                     | 2nd year         | 3/1166 ( 0.3%)  | 8/1206 ( 0.7%)  | 11/2372 ( 0.5%) |
|                                                                     | 3rd year         | 4/ 963 ( 0.4%)  | 2/1012 ( 0.2%)  | 6/1975 ( 0.3%)  |
|                                                                     | Overall          | 14/1432 ( 1.0%) | 15/1452 ( 1.0%) | 29/2884 ( 1.0%) |
| Pneumonia mycoplasmal                                               | 2nd year         | 1/1166 (<0.1%)  | 0/1206          | 1/2372 (<0.1%)  |
|                                                                     | Overall          | 1/1432 (<0.1%)  | 0/1452          | 1/2884 (<0.1%)  |
| Pogosta disease                                                     | 2nd year         | 1/1166 (<0.1%)  | 0/1206          | 1/2372 (<0.1%)  |
|                                                                     | Overall          | 1/1432 (<0.1%)  | 0/1452          | 1/2884 (<0.1%)  |
| Post procedural infection                                           | 1st year         | 3/1432 ( 0.2%)  | 0/1452          | 3/2884 ( 0.1%)  |
|                                                                     | 3rd year         | 0/ 963          | 1/1012 (<0.1%)  | 1/1975 (<0.1%)  |
|                                                                     | Overall          | 3/1432 ( 0.2%)  | 1/1452 (<0.1%)  | 4/2884 ( 0.1%)  |
| Pulpitis dental                                                     | 2nd year         | 0/1166          | 1/1206 (<0.1%)  | 1/2372 (<0.1%)  |
|                                                                     | Overall          | 0/1432          | 1/1452 (<0.1%)  | 1/2884 (<0.1%)  |
| Pyelonephritis                                                      | 1st year         | 6/1432 ( 0.4%)  | 2/1452 ( 0.1%)  | 8/2884 ( 0.3%)  |
|                                                                     | 2nd year         | 3/1166 ( 0.3%)  | 1/1206 (<0.1%)  | 4/2372 ( 0.2%)  |
|                                                                     | Overall          | 9/1432 ( 0.6%)  | 3/1452 ( 0.2%)  | 12/2884 ( 0.4%) |
| Pyelonephritis acute                                                | 1st year         | 1/1432 (<0.1%)  | 0/1452          | 1/2884 (<0.1%)  |
|                                                                     | 3rd year         | 1/ 963 ( 0.1%)  | 0/1012          | 1/1975 (<0.1%)  |
|                                                                     | Overall          | 2/1432 ( 0.1%)  | 0/1452          | 2/2884 (<0.1%)  |
| Q fever                                                             | 2nd year         | 1/1166 (<0.1%)  | 0/1206          | 1/2372 (<0.1%)  |
|                                                                     | Overall          | 1/1432 (<0.1%)  | 0/1452          | 1/2884 (<0.1%)  |
| Rash pustular                                                       | 1st year         | 0/1432          | 1/1452 (<0.1%)  | 1/2884 (<0.1%)  |
|                                                                     | Overall          | 0/1432          | 1/1452 (<0.1%)  | 1/2884 (<0.1%)  |
| Respiratory tract infection                                         | 1st year         | 6/1432 ( 0.4%)  | 7/1452 ( 0.5%)  | 13/2884 ( 0.5%) |
|                                                                     | 2nd year         | 5/1166 ( 0.4%)  | 5/1206 ( 0.4%)  | 10/2372 ( 0.4%) |
|                                                                     | 3rd year         | 0/ 963          | 9/1012 ( 0.9%)  | 9/1975 ( 0.5%)  |
|                                                                     | Overall          | 10/1432 ( 0.7%) | 16/1452 ( 1.1%) | 26/2884 ( 0.9%) |
| Respiratory tract infection viral                                   | 1st year         | 0/1432          | 1/1452 (<0.1%)  | 1/2884 (<0.1%)  |
|                                                                     | 3rd year         | 2/ 963 ( 0.2%)  | 0/1012          | 2/1975 ( 0.1%)  |
|                                                                     | Overall          | 2/1432 ( 0.1%)  | 1/1452 (<0.1%)  | 3/2884 ( 0.1%)  |

**Table 14.3.1 / 9: Number of subjects with adverse events by primary system organ class, preferred term and year (FAS)**

| Primary system organ class<br>Preferred term<br>MedDRA version 14.0 | YEAR OF<br>ONSET | LCS12           | LCS16           | Total            |
|---------------------------------------------------------------------|------------------|-----------------|-----------------|------------------|
| Rhinitis                                                            | 1st year         | 6/1432 ( 0.4%)  | 7/1452 ( 0.5%)  | 13/2884 ( 0.5%)  |
|                                                                     | 2nd year         | 0/1166          | 4/1206 ( 0.3%)  | 4/2372 ( 0.2%)   |
|                                                                     | 3rd year         | 0/ 963          | 1/1012 (<0.1%)  | 1/1975 (<0.1%)   |
|                                                                     | Overall          | 6/1432 ( 0.4%)  | 12/1452 ( 0.8%) | 18/2884 ( 0.6%)  |
| Salpingitis                                                         | 2nd year         | 1/1166 (<0.1%)  | 0/1206          | 1/2372 (<0.1%)   |
|                                                                     | Overall          | 1/1432 (<0.1%)  | 0/1452          | 1/2884 (<0.1%)   |
| Salpingo-oophoritis                                                 | 1st year         | 2/1432 ( 0.1%)  | 3/1452 ( 0.2%)  | 5/2884 ( 0.2%)   |
|                                                                     | Overall          | 2/1432 ( 0.1%)  | 3/1452 ( 0.2%)  | 5/2884 ( 0.2%)   |
| Sialoadenitis                                                       | 1st year         | 1/1432 (<0.1%)  | 0/1452          | 1/2884 (<0.1%)   |
|                                                                     | 2nd year         | 1/1166 (<0.1%)  | 0/1206          | 1/2372 (<0.1%)   |
|                                                                     | Overall          | 1/1432 (<0.1%)  | 0/1452          | 1/2884 (<0.1%)   |
| Sinobronchitis                                                      | 3rd year         | 0/ 963          | 1/1012 (<0.1%)  | 1/1975 (<0.1%)   |
|                                                                     | Overall          | 0/1432          | 1/1452 (<0.1%)  | 1/2884 (<0.1%)   |
| Sinusitis                                                           | 1st year         | 55/1432 ( 3.8%) | 47/1452 ( 3.2%) | 102/2884 ( 3.5%) |
|                                                                     | 2nd year         | 33/1166 ( 2.8%) | 34/1206 ( 2.8%) | 67/2372 ( 2.8%)  |
|                                                                     | 3rd year         | 26/ 963 ( 2.7%) | 29/1012 ( 2.9%) | 55/1975 ( 2.8%)  |
|                                                                     | Overall          | 90/1432 ( 6.3%) | 96/1452 ( 6.6%) | 186/2884 ( 6.4%) |
| Skin bacterial infection                                            | 1st year         | 0/1432          | 1/1452 (<0.1%)  | 1/2884 (<0.1%)   |
|                                                                     | 3rd year         | 1/ 963 ( 0.1%)  | 1/1012 (<0.1%)  | 2/1975 ( 0.1%)   |
|                                                                     | Overall          | 1/1432 (<0.1%)  | 2/1452 ( 0.1%)  | 3/2884 ( 0.1%)   |
| Skin candida                                                        | 3rd year         | 1/ 963 ( 0.1%)  | 0/1012          | 1/1975 (<0.1%)   |
|                                                                     | Overall          | 1/1432 (<0.1%)  | 0/1452          | 1/2884 (<0.1%)   |
| Skin infection                                                      | 1st year         | 1/1432 (<0.1%)  | 2/1452 ( 0.1%)  | 3/2884 ( 0.1%)   |
|                                                                     | 2nd year         | 0/1166          | 2/1206 ( 0.2%)  | 2/2372 (<0.1%)   |
|                                                                     | 3rd year         | 0/ 963          | 2/1012 ( 0.2%)  | 2/1975 ( 0.1%)   |
|                                                                     | Overall          | 1/1432 (<0.1%)  | 6/1452 ( 0.4%)  | 7/2884 ( 0.2%)   |
| Small intestinal bacterial overgrowth                               | 3rd year         | 0/ 963          | 1/1012 (<0.1%)  | 1/1975 (<0.1%)   |
|                                                                     | Overall          | 0/1432          | 1/1452 (<0.1%)  | 1/2884 (<0.1%)   |
| Staphylococcal infection                                            | 1st year         | 1/1432 (<0.1%)  | 1/1452 (<0.1%)  | 2/2884 (<0.1%)   |
|                                                                     | Overall          | 1/1432 (<0.1%)  | 1/1452 (<0.1%)  | 2/2884 (<0.1%)   |

**Table 14.3.1 / 9: Number of subjects with adverse events by primary system organ class, preferred term and year (FAS)**

| Primary system organ class<br>Preferred term<br>MedDRA version 14.0 | YEAR OF<br>ONSET | YEAR OF         |                 | Total           |
|---------------------------------------------------------------------|------------------|-----------------|-----------------|-----------------|
|                                                                     |                  | LCS12           | LCS16           |                 |
| Staphylococcal skin infection                                       | 1st year         | 1/1432 ( <0.1%) | 0/1452          | 1/2884 ( <0.1%) |
|                                                                     | Overall          | 1/1432 ( <0.1%) | 0/1452          | 1/2884 ( <0.1%) |
| Streptococcal infection                                             | 2nd year         | 1/1166 ( <0.1%) | 0/1206          | 1/2372 ( <0.1%) |
|                                                                     | Overall          | 1/1432 ( <0.1%) | 0/1452          | 1/2884 ( <0.1%) |
| Streptococcal sepsis                                                | 2nd year         | 1/1166 ( <0.1%) | 0/1206          | 1/2372 ( <0.1%) |
|                                                                     | Overall          | 1/1432 ( <0.1%) | 0/1452          | 1/2884 ( <0.1%) |
| Subcutaneous abscess                                                | 1st year         | 2/1432 ( 0.1%)  | 0/1452          | 2/2884 ( <0.1%) |
|                                                                     | 2nd year         | 1/1166 ( <0.1%) | 2/1206 ( 0.2%)  | 3/2372 ( 0.1%)  |
|                                                                     | 3rd year         | 1/ 963 ( 0.1%)  | 0/1012          | 1/1975 ( <0.1%) |
|                                                                     | Overall          | 3/1432 ( 0.2%)  | 2/1452 ( 0.1%)  | 5/2884 ( 0.2%)  |
| Sweat gland infection                                               | 1st year         | 1/1432 ( <0.1%) | 0/1452          | 1/2884 ( <0.1%) |
|                                                                     | Overall          | 1/1432 ( <0.1%) | 0/1452          | 1/2884 ( <0.1%) |
| Tinea infection                                                     | 1st year         | 1/1432 ( <0.1%) | 0/1452          | 1/2884 ( <0.1%) |
|                                                                     | 3rd year         | 0/ 963          | 2/1012 ( 0.2%)  | 2/1975 ( 0.1%)  |
|                                                                     | Overall          | 1/1432 ( <0.1%) | 2/1452 ( 0.1%)  | 3/2884 ( 0.1%)  |
| Tinea pedis                                                         | 1st year         | 0/1432          | 1/1452 ( <0.1%) | 1/2884 ( <0.1%) |
|                                                                     | 3rd year         | 1/ 963 ( 0.1%)  | 0/1012          | 1/1975 ( <0.1%) |
|                                                                     | Overall          | 1/1432 ( <0.1%) | 1/1452 ( <0.1%) | 2/2884 ( <0.1%) |
| Tinea versicolour                                                   | 1st year         | 0/1432          | 1/1452 ( <0.1%) | 1/2884 ( <0.1%) |
|                                                                     | Overall          | 0/1432          | 1/1452 ( <0.1%) | 1/2884 ( <0.1%) |
| Tonsillitis                                                         | 1st year         | 15/1432 ( 1.0%) | 8/1452 ( 0.6%)  | 23/2884 ( 0.8%) |
|                                                                     | 2nd year         | 9/1166 ( 0.8%)  | 8/1206 ( 0.7%)  | 17/2372 ( 0.7%) |
|                                                                     | 3rd year         | 6/ 963 ( 0.6%)  | 8/1012 ( 0.8%)  | 14/1975 ( 0.7%) |
|                                                                     | Overall          | 25/1432 ( 1.7%) | 24/1452 ( 1.7%) | 49/2884 ( 1.7%) |
| Tonsillitis streptococcal                                           | 2nd year         | 1/1166 ( <0.1%) | 0/1206          | 1/2372 ( <0.1%) |
|                                                                     | 3rd year         | 1/ 963 ( 0.1%)  | 0/1012          | 1/1975 ( <0.1%) |
|                                                                     | Overall          | 1/1432 ( <0.1%) | 0/1452          | 1/2884 ( <0.1%) |
| Tooth abscess                                                       | 1st year         | 5/1432 ( 0.3%)  | 3/1452 ( 0.2%)  | 8/2884 ( 0.3%)  |
|                                                                     | 2nd year         | 0/1166          | 1/1206 ( <0.1%) | 1/2372 ( <0.1%) |
|                                                                     | Overall          | 5/1432 ( 0.3%)  | 4/1452 ( 0.3%)  | 9/2884 ( 0.3%)  |

**Table 14.3.1 / 9: Number of subjects with adverse events by primary system organ class, preferred term and year (FAS)**

| Primary system organ class<br>Preferred term<br>MedDRA version 14.0 | YEAR OF<br>ONSET | LCS12             | LCS16             | Total             |
|---------------------------------------------------------------------|------------------|-------------------|-------------------|-------------------|
| Tooth infection                                                     | 1st year         | 11/1432 ( 0.8%)   | 7/1452 ( 0.5%)    | 18/2884 ( 0.6%)   |
|                                                                     | 2nd year         | 4/1166 ( 0.3%)    | 3/1206 ( 0.2%)    | 7/2372 ( 0.3%)    |
|                                                                     | 3rd year         | 10/ 963 ( 1.0%)   | 6/1012 ( 0.6%)    | 16/1975 ( 0.8%)   |
|                                                                     | Overall          | 25/1432 ( 1.7%)   | 15/1452 ( 1.0%)   | 40/2884 ( 1.4%)   |
|                                                                     |                  |                   |                   |                   |
| Tracheitis                                                          | 1st year         | 1/1432 (<0.1%)    | 0/1452            | 1/2884 (<0.1%)    |
|                                                                     | Overall          | 1/1432 (<0.1%)    | 0/1452            | 1/2884 (<0.1%)    |
| Trichomoniasis                                                      | 1st year         | 1/1432 (<0.1%)    | 0/1452            | 1/2884 (<0.1%)    |
|                                                                     | 2nd year         | 1/1166 (<0.1%)    | 1/1206 (<0.1%)    | 2/2372 (<0.1%)    |
|                                                                     | 3rd year         | 0/ 963            | 1/1012 (<0.1%)    | 1/1975 (<0.1%)    |
|                                                                     | Overall          | 2/1432 ( 0.1%)    | 2/1452 ( 0.1%)    | 4/2884 ( 0.1%)    |
| Tuberculosis                                                        | 3rd year         | 1/ 963 ( 0.1%)    | 0/1012            | 1/1975 (<0.1%)    |
|                                                                     | Overall          | 1/1432 (<0.1%)    | 0/1452            | 1/2884 (<0.1%)    |
| Tubo-ovarian abscess                                                | 1st year         | 1/1432 (<0.1%)    | 0/1452            | 1/2884 (<0.1%)    |
|                                                                     | Overall          | 1/1432 (<0.1%)    | 0/1452            | 1/2884 (<0.1%)    |
| Typhoid fever                                                       | 1st year         | 0/1432            | 1/1452 (<0.1%)    | 1/2884 (<0.1%)    |
|                                                                     | Overall          | 0/1432            | 1/1452 (<0.1%)    | 1/2884 (<0.1%)    |
| Upper respiratory tract infection                                   | 1st year         | 31/1432 ( 2.2%)   | 41/1452 ( 2.8%)   | 72/2884 ( 2.5%)   |
|                                                                     | 2nd year         | 16/1166 ( 1.4%)   | 20/1206 ( 1.7%)   | 36/2372 ( 1.5%)   |
|                                                                     | 3rd year         | 13/ 963 ( 1.3%)   | 8/1012 ( 0.8%)    | 21/1975 ( 1.1%)   |
|                                                                     | Overall          | 51/1432 ( 3.6%)   | 57/1452 ( 3.9%)   | 108/2884 ( 3.7%)  |
| Ureaplasma infection                                                | 2nd year         | 1/1166 (<0.1%)    | 0/1206            | 1/2372 (<0.1%)    |
|                                                                     | Overall          | 1/1432 (<0.1%)    | 0/1452            | 1/2884 (<0.1%)    |
| Urinary tract infection                                             | 1st year         | 94/1432 ( 6.6%)   | 87/1452 ( 6.0%)   | 181/2884 ( 6.3%)  |
|                                                                     | 2nd year         | 42/1166 ( 3.6%)   | 38/1206 ( 3.2%)   | 80/2372 ( 3.4%)   |
|                                                                     | 3rd year         | 43/ 963 ( 4.5%)   | 38/1012 ( 3.8%)   | 81/1975 ( 4.1%)   |
|                                                                     | Overall          | 158/1432 ( 11.0%) | 145/1452 ( 10.0%) | 303/2884 ( 10.5%) |
| Uterine infection                                                   | 1st year         | 0/1432            | 1/1452 (<0.1%)    | 1/2884 (<0.1%)    |
|                                                                     | Overall          | 0/1432            | 1/1452 (<0.1%)    | 1/2884 (<0.1%)    |



**Table 14.3.1 / 9: Number of subjects with adverse events by primary system organ class, preferred term and year (FAS)**

| Primary system organ class<br>Preferred term<br>MedDRA version 14.0 | YEAR OF<br>ONSET | LCS12            | LCS16            | Total            |
|---------------------------------------------------------------------|------------------|------------------|------------------|------------------|
| Vaginal infection                                                   | 1st year         | 28/1432 ( 2.0%)  | 40/1452 ( 2.8%)  | 68/2884 ( 2.4%)  |
|                                                                     | 2nd year         | 20/1166 ( 1.7%)  | 10/1206 ( 0.8%)  | 30/2372 ( 1.3%)  |
|                                                                     | 3rd year         | 6/ 963 ( 0.6%)   | 15/1012 ( 1.5%)  | 21/1975 ( 1.1%)  |
|                                                                     | Overall          | 48/1432 ( 3.4%)  | 60/1452 ( 4.1%)  | 108/2884 ( 3.7%) |
|                                                                     |                  |                  |                  |                  |
| Vaginitis bacterial                                                 | 1st year         | 52/1432 ( 3.6%)  | 61/1452 ( 4.2%)  | 113/2884 ( 3.9%) |
|                                                                     | 2nd year         | 36/1166 ( 3.1%)  | 50/1206 ( 4.1%)  | 86/2372 ( 3.6%)  |
|                                                                     | 3rd year         | 30/ 963 ( 3.1%)  | 45/1012 ( 4.4%)  | 75/1975 ( 3.8%)  |
|                                                                     | Overall          | 105/1432 ( 7.3%) | 127/1452 ( 8.7%) | 232/2884 ( 8.0%) |
|                                                                     |                  |                  |                  |                  |
| Vaginitis chlamydial                                                | 1st year         | 1/1432 (<0.1%)   | 1/1452 (<0.1%)   | 2/2884 (<0.1%)   |
|                                                                     | 2nd year         | 1/1166 (<0.1%)   | 0/1206           | 1/2372 (<0.1%)   |
|                                                                     | Overall          | 2/1432 ( 0.1%)   | 1/1452 (<0.1%)   | 3/2884 ( 0.1%)   |
|                                                                     |                  |                  |                  |                  |
| Vaginitis gardnerella                                               | 1st year         | 0/1432           | 2/1452 ( 0.1%)   | 2/2884 (<0.1%)   |
|                                                                     | 2nd year         | 0/1166           | 1/1206 (<0.1%)   | 1/2372 (<0.1%)   |
|                                                                     | 3rd year         | 0/ 963           | 1/1012 (<0.1%)   | 1/1975 (<0.1%)   |
|                                                                     | Overall          | 0/1432           | 4/1452 ( 0.3%)   | 4/2884 ( 0.1%)   |
|                                                                     |                  |                  |                  |                  |
| Vestibular neuritis                                                 | 1st year         | 2/1432 ( 0.1%)   | 0/1452           | 2/2884 (<0.1%)   |
|                                                                     | Overall          | 2/1432 ( 0.1%)   | 0/1452           | 2/2884 (<0.1%)   |
|                                                                     |                  |                  |                  |                  |
| Viral infection                                                     | 1st year         | 0/1432           | 2/1452 ( 0.1%)   | 2/2884 (<0.1%)   |
|                                                                     | 2nd year         | 2/1166 ( 0.2%)   | 1/1206 (<0.1%)   | 3/2372 ( 0.1%)   |
|                                                                     | 3rd year         | 1/ 963 ( 0.1%)   | 0/1012           | 1/1975 (<0.1%)   |
|                                                                     | Overall          | 3/1432 ( 0.2%)   | 3/1452 ( 0.2%)   | 6/2884 ( 0.2%)   |
|                                                                     |                  |                  |                  |                  |
| Viral pharyngitis                                                   | 1st year         | 0/1432           | 1/1452 (<0.1%)   | 1/2884 (<0.1%)   |
|                                                                     | 2nd year         | 1/1166 (<0.1%)   | 0/1206           | 1/2372 (<0.1%)   |
|                                                                     | Overall          | 1/1432 (<0.1%)   | 1/1452 (<0.1%)   | 2/2884 (<0.1%)   |
|                                                                     |                  |                  |                  |                  |
| Viral rhinitis                                                      | 2nd year         | 1/1166 (<0.1%)   | 0/1206           | 1/2372 (<0.1%)   |
|                                                                     | Overall          | 1/1432 (<0.1%)   | 0/1452           | 1/2884 (<0.1%)   |
|                                                                     |                  |                  |                  |                  |
| Viral upper respiratory tract infection                             | 1st year         | 7/1432 ( 0.5%)   | 7/1452 ( 0.5%)   | 14/2884 ( 0.5%)  |
|                                                                     | 2nd year         | 9/1166 ( 0.8%)   | 9/1206 ( 0.7%)   | 18/2372 ( 0.8%)  |
|                                                                     | 3rd year         | 1/ 963 ( 0.1%)   | 3/1012 ( 0.3%)   | 4/1975 ( 0.2%)   |
|                                                                     | Overall          | 15/1432 ( 1.0%)  | 14/1452 ( 1.0%)  | 29/2884 ( 1.0%)  |
|                                                                     |                  |                  |                  |                  |

**Table 14.3.1 / 9: Number of subjects with adverse events by primary system organ class, preferred term and year (FAS)**

| Primary system organ class<br>Preferred term<br>MedDRA version 14.0 | YEAR OF<br>ONSET | YEAR OF         |                  | Total            |
|---------------------------------------------------------------------|------------------|-----------------|------------------|------------------|
|                                                                     |                  | LCS12           | LCS16            |                  |
| Vulval abscess                                                      | 1st year         | 0/1432          | 1/1452 ( <0.1%)  | 1/2884 ( <0.1%)  |
|                                                                     | Overall          | 0/1432          | 1/1452 ( <0.1%)  | 1/2884 ( <0.1%)  |
| Vulvitis                                                            | 1st year         | 5/1432 ( 0.3%)  | 5/1452 ( 0.3%)   | 10/2884 ( 0.3%)  |
|                                                                     | 2nd year         | 3/1166 ( 0.3%)  | 1/1206 ( <0.1%)  | 4/2372 ( 0.2%)   |
|                                                                     | 3rd year         | 0/ 963          | 1/1012 ( <0.1%)  | 1/1975 ( <0.1%)  |
|                                                                     | Overall          | 8/1432 ( 0.6%)  | 7/1452 ( 0.5%)   | 15/2884 ( 0.5%)  |
| Vulvovaginal candidiasis                                            | 1st year         | 40/1432 ( 2.8%) | 39/1452 ( 2.7%)  | 79/2884 ( 2.7%)  |
|                                                                     | 2nd year         | 25/1166 ( 2.1%) | 30/1206 ( 2.5%)  | 55/2372 ( 2.3%)  |
|                                                                     | 3rd year         | 16/ 963 ( 1.7%) | 19/1012 ( 1.9%)  | 35/1975 ( 1.8%)  |
|                                                                     | Overall          | 72/1432 ( 5.0%) | 72/1452 ( 5.0%)  | 144/2884 ( 5.0%) |
| Vulvovaginal mycotic infection                                      | 1st year         | 61/1432 ( 4.3%) | 67/1452 ( 4.6%)  | 128/2884 ( 4.4%) |
|                                                                     | 2nd year         | 35/1166 ( 3.0%) | 40/1206 ( 3.3%)  | 75/2372 ( 3.2%)  |
|                                                                     | 3rd year         | 20/ 963 ( 2.1%) | 31/1012 ( 3.1%)  | 51/1975 ( 2.6%)  |
|                                                                     | Overall          | 99/1432 ( 6.9%) | 110/1452 ( 7.6%) | 209/2884 ( 7.2%) |
| Vulvovaginitis                                                      | 1st year         | 6/1432 ( 0.4%)  | 5/1452 ( 0.3%)   | 11/2884 ( 0.4%)  |
|                                                                     | 2nd year         | 0/1166          | 1/1206 ( <0.1%)  | 1/2372 ( <0.1%)  |
|                                                                     | 3rd year         | 1/ 963 ( 0.1%)  | 2/1012 ( 0.2%)   | 3/1975 ( 0.2%)   |
|                                                                     | Overall          | 6/1432 ( 0.4%)  | 7/1452 ( 0.5%)   | 13/2884 ( 0.5%)  |
| Vulvovaginitis chlamydial                                           | 2nd year         | 0/1166          | 1/1206 ( <0.1%)  | 1/2372 ( <0.1%)  |
|                                                                     | Overall          | 0/1432          | 1/1452 ( <0.1%)  | 1/2884 ( <0.1%)  |
| Vulvovaginitis streptococcal                                        | 1st year         | 1/1432 ( <0.1%) | 1/1452 ( <0.1%)  | 2/2884 ( <0.1%)  |
|                                                                     | 3rd year         | 0/ 963          | 1/1012 ( <0.1%)  | 1/1975 ( <0.1%)  |
|                                                                     | Overall          | 1/1432 ( <0.1%) | 2/1452 ( 0.1%)   | 3/2884 ( 0.1%)   |
| Vulvovaginitis trichomonal                                          | 1st year         | 1/1432 ( <0.1%) | 2/1452 ( 0.1%)   | 3/2884 ( 0.1%)   |
|                                                                     | 2nd year         | 1/1166 ( <0.1%) | 1/1206 ( <0.1%)  | 2/2372 ( <0.1%)  |
|                                                                     | 3rd year         | 2/ 963 ( 0.2%)  | 1/1012 ( <0.1%)  | 3/1975 ( 0.2%)   |
|                                                                     | Overall          | 4/1432 ( 0.3%)  | 4/1452 ( 0.3%)   | 8/2884 ( 0.3%)   |
| Wound infection                                                     | 1st year         | 1/1432 ( <0.1%) | 1/1452 ( <0.1%)  | 2/2884 ( <0.1%)  |
|                                                                     | 2nd year         | 1/1166 ( <0.1%) | 0/1206           | 1/2372 ( <0.1%)  |
|                                                                     | 3rd year         | 1/ 963 ( 0.1%)  | 0/1012           | 1/1975 ( <0.1%)  |
|                                                                     | Overall          | 3/1432 ( 0.2%)  | 1/1452 ( <0.1%)  | 4/2884 ( 0.1%)   |

**Table 14.3.1 / 9: Number of subjects with adverse events by primary system organ class, preferred term and year (FAS)**

| Primary system organ class<br>Preferred term<br>MedDRA version 14.0 | YEAR OF<br>ONSET | LCS12             | LCS16            | Total            |
|---------------------------------------------------------------------|------------------|-------------------|------------------|------------------|
| Wound infection staphylococcal                                      | 3rd year         | 0/ 963            | 1/1012 ( <0.1%)  | 1/1975 ( <0.1%)  |
|                                                                     | Overall          | 0/1432            | 1/1452 ( <0.1%)  | 1/2884 ( <0.1%)  |
| Injury, poisoning and procedural complications                      | 1st year         | 98/1432 ( 6.8%)   | 88/1452 ( 6.1%)  | 186/2884 ( 6.4%) |
|                                                                     | 2nd year         | 31/1166 ( 2.7%)   | 29/1206 ( 2.4%)  | 60/2372 ( 2.5%)  |
|                                                                     | 3rd year         | 30/ 963 ( 3.1%)   | 30/1012 ( 3.0%)  | 60/1975 ( 3.0%)  |
|                                                                     | Overall          | 149/1432 ( 10.4%) | 133/1452 ( 9.2%) | 282/2884 ( 9.8%) |
| Abdominal wound dehiscence                                          | 3rd year         | 0/ 963            | 1/1012 ( <0.1%)  | 1/1975 ( <0.1%)  |
|                                                                     | Overall          | 0/1432            | 1/1452 ( <0.1%)  | 1/2884 ( <0.1%)  |
| Accident                                                            | 2nd year         | 0/1166            | 1/1206 ( <0.1%)  | 1/2372 ( <0.1%)  |
|                                                                     | Overall          | 0/1432            | 1/1452 ( <0.1%)  | 1/2884 ( <0.1%)  |
| Animal bite                                                         | 1st year         | 2/1432 ( 0.1%)    | 1/1452 ( <0.1%)  | 3/2884 ( 0.1%)   |
|                                                                     | 2nd year         | 1/1166 ( <0.1%)   | 1/1206 ( <0.1%)  | 2/2372 ( <0.1%)  |
|                                                                     | 3rd year         | 0/ 963            | 1/1012 ( <0.1%)  | 1/1975 ( <0.1%)  |
|                                                                     | Overall          | 3/1432 ( 0.2%)    | 2/1452 ( 0.1%)   | 5/2884 ( 0.2%)   |
| Ankle fracture                                                      | 1st year         | 0/1432            | 1/1452 ( <0.1%)  | 1/2884 ( <0.1%)  |
|                                                                     | 2nd year         | 1/1166 ( <0.1%)   | 1/1206 ( <0.1%)  | 2/2372 ( <0.1%)  |
|                                                                     | Overall          | 1/1432 ( <0.1%)   | 2/1452 ( 0.1%)   | 3/2884 ( 0.1%)   |
| Arthropod bite                                                      | 1st year         | 3/1432 ( 0.2%)    | 2/1452 ( 0.1%)   | 5/2884 ( 0.2%)   |
|                                                                     | 2nd year         | 1/1166 ( <0.1%)   | 0/1206           | 1/2372 ( <0.1%)  |
|                                                                     | 3rd year         | 1/ 963 ( 0.1%)    | 0/1012           | 1/1975 ( <0.1%)  |
|                                                                     | Overall          | 5/1432 ( 0.3%)    | 2/1452 ( 0.1%)   | 7/2884 ( 0.2%)   |
| Arthropod sting                                                     | 1st year         | 0/1432            | 1/1452 ( <0.1%)  | 1/2884 ( <0.1%)  |
|                                                                     | 3rd year         | 0/ 963            | 1/1012 ( <0.1%)  | 1/1975 ( <0.1%)  |
|                                                                     | Overall          | 0/1432            | 2/1452 ( 0.1%)   | 2/2884 ( <0.1%)  |
| Back injury                                                         | 2nd year         | 0/1166            | 1/1206 ( <0.1%)  | 1/2372 ( <0.1%)  |
|                                                                     | Overall          | 0/1432            | 1/1452 ( <0.1%)  | 1/2884 ( <0.1%)  |
| Burns second degree                                                 | 2nd year         | 0/1166            | 1/1206 ( <0.1%)  | 1/2372 ( <0.1%)  |
|                                                                     | Overall          | 0/1432            | 1/1452 ( <0.1%)  | 1/2884 ( <0.1%)  |
| Burns third degree                                                  | 1st year         | 1/1432 ( <0.1%)   | 0/1452           | 1/2884 ( <0.1%)  |
|                                                                     | Overall          | 1/1432 ( <0.1%)   | 0/1452           | 1/2884 ( <0.1%)  |

**Table 14.3.1 / 9: Number of subjects with adverse events by primary system organ class, preferred term and year (FAS)**

| Primary system organ class<br>Preferred term<br>MedDRA version 14.0 | YEAR OF<br>ONSET | LCS             |                 | Total           |
|---------------------------------------------------------------------|------------------|-----------------|-----------------|-----------------|
|                                                                     |                  | LCS12           | LCS16           |                 |
| Cartilage injury                                                    | 2nd year         | 0/1166          | 1/1206 ( <0.1%) | 1/2372 ( <0.1%) |
|                                                                     | Overall          | 0/1432          | 1/1452 ( <0.1%) | 1/2884 ( <0.1%) |
| Clavicle fracture                                                   | 3rd year         | 1/ 963 ( 0.1%)  | 0/1012          | 1/1975 ( <0.1%) |
|                                                                     | Overall          | 1/1432 ( <0.1%) | 0/1452          | 1/2884 ( <0.1%) |
| Concussion                                                          | 1st year         | 1/1432 ( <0.1%) | 6/1452 ( 0.4%)  | 7/2884 ( 0.2%)  |
|                                                                     | 2nd year         | 2/1166 ( 0.2%)  | 1/1206 ( <0.1%) | 3/2372 ( 0.1%)  |
|                                                                     | 3rd year         | 0/ 963          | 1/1012 ( <0.1%) | 1/1975 ( <0.1%) |
|                                                                     | Overall          | 3/1432 ( 0.2%)  | 8/1452 ( 0.6%)  | 11/2884 ( 0.4%) |
| Contusion                                                           | 1st year         | 5/1432 ( 0.3%)  | 2/1452 ( 0.1%)  | 7/2884 ( 0.2%)  |
|                                                                     | 2nd year         | 0/1166          | 2/1206 ( 0.2%)  | 2/2372 ( <0.1%) |
|                                                                     | 3rd year         | 2/ 963 ( 0.2%)  | 1/1012 ( <0.1%) | 3/1975 ( 0.2%)  |
|                                                                     | Overall          | 7/1432 ( 0.5%)  | 5/1452 ( 0.3%)  | 12/2884 ( 0.4%) |
| Epicondylitis                                                       | 1st year         | 2/1432 ( 0.1%)  | 3/1452 ( 0.2%)  | 5/2884 ( 0.2%)  |
|                                                                     | 2nd year         | 0/1166          | 1/1206 ( <0.1%) | 1/2372 ( <0.1%) |
|                                                                     | Overall          | 2/1432 ( 0.1%)  | 4/1452 ( 0.3%)  | 6/2884 ( 0.2%)  |
| Excoriation                                                         | 1st year         | 0/1432          | 1/1452 ( <0.1%) | 1/2884 ( <0.1%) |
|                                                                     | Overall          | 0/1432          | 1/1452 ( <0.1%) | 1/2884 ( <0.1%) |
| Eye injury                                                          | 1st year         | 0/1432          | 1/1452 ( <0.1%) | 1/2884 ( <0.1%) |
|                                                                     | 3rd year         | 1/ 963 ( 0.1%)  | 0/1012          | 1/1975 ( <0.1%) |
|                                                                     | Overall          | 1/1432 ( <0.1%) | 1/1452 ( <0.1%) | 2/2884 ( <0.1%) |
| Facial bones fracture                                               | 2nd year         | 2/1166 ( 0.2%)  | 0/1206          | 2/2372 ( <0.1%) |
|                                                                     | Overall          | 2/1432 ( 0.1%)  | 0/1452          | 2/2884 ( <0.1%) |
| Fall                                                                | 3rd year         | 0/ 963          | 1/1012 ( <0.1%) | 1/1975 ( <0.1%) |
|                                                                     | Overall          | 0/1432          | 1/1452 ( <0.1%) | 1/2884 ( <0.1%) |
| Foot fracture                                                       | 1st year         | 3/1432 ( 0.2%)  | 3/1452 ( 0.2%)  | 6/2884 ( 0.2%)  |
|                                                                     | 2nd year         | 3/1166 ( 0.3%)  | 0/1206          | 3/2372 ( 0.1%)  |
|                                                                     | 3rd year         | 4/ 963 ( 0.4%)  | 0/1012          | 4/1975 ( 0.2%)  |
|                                                                     | Overall          | 9/1432 ( 0.6%)  | 3/1452 ( 0.2%)  | 12/2884 ( 0.4%) |
| Forearm fracture                                                    | 1st year         | 1/1432 ( <0.1%) | 0/1452          | 1/2884 ( <0.1%) |
|                                                                     | Overall          | 1/1432 ( <0.1%) | 0/1452          | 1/2884 ( <0.1%) |

**Table 14.3.1 / 9: Number of subjects with adverse events by primary system organ class, preferred term and year (FAS)**

| Primary system organ class<br>Preferred term<br>MedDRA version 14.0 | YEAR OF<br>ONSET | LCS12           | LCS16           | Total           |
|---------------------------------------------------------------------|------------------|-----------------|-----------------|-----------------|
| Frostbite                                                           | 1st year         | 1/1432 ( <0.1%) | 0/1452          | 1/2884 ( <0.1%) |
|                                                                     | Overall          | 1/1432 ( <0.1%) | 0/1452          | 1/2884 ( <0.1%) |
| Hand fracture                                                       | 2nd year         | 0/1166          | 1/1206 ( <0.1%) | 1/2372 ( <0.1%) |
|                                                                     | 3rd year         | 1/ 963 ( 0.1%)  | 2/1012 ( 0.2%)  | 3/1975 ( 0.2%)  |
|                                                                     | Overall          | 1/1432 ( <0.1%) | 3/1452 ( 0.2%)  | 4/2884 ( 0.1%)  |
| Head injury                                                         | 1st year         | 1/1432 ( <0.1%) | 0/1452          | 1/2884 ( <0.1%) |
|                                                                     | 3rd year         | 0/ 963          | 1/1012 ( <0.1%) | 1/1975 ( <0.1%) |
|                                                                     | Overall          | 1/1432 ( <0.1%) | 1/1452 ( <0.1%) | 2/2884 ( <0.1%) |
| Humerus fracture                                                    | 3rd year         | 0/ 963          | 1/1012 ( <0.1%) | 1/1975 ( <0.1%) |
|                                                                     | Overall          | 0/1432          | 1/1452 ( <0.1%) | 1/2884 ( <0.1%) |
| Injury                                                              | 1st year         | 0/1432          | 1/1452 ( <0.1%) | 1/2884 ( <0.1%) |
|                                                                     | Overall          | 0/1432          | 1/1452 ( <0.1%) | 1/2884 ( <0.1%) |
| Joint dislocation                                                   | 1st year         | 3/1432 ( 0.2%)  | 1/1452 ( <0.1%) | 4/2884 ( 0.1%)  |
|                                                                     | 2nd year         | 1/1166 ( <0.1%) | 0/1206          | 1/2372 ( <0.1%) |
|                                                                     | 3rd year         | 1/ 963 ( 0.1%)  | 0/1012          | 1/1975 ( <0.1%) |
|                                                                     | Overall          | 5/1432 ( 0.3%)  | 1/1452 ( <0.1%) | 6/2884 ( 0.2%)  |
| Joint injury                                                        | 1st year         | 5/1432 ( 0.3%)  | 2/1452 ( 0.1%)  | 7/2884 ( 0.2%)  |
|                                                                     | 2nd year         | 1/1166 ( <0.1%) | 1/1206 ( <0.1%) | 2/2372 ( <0.1%) |
|                                                                     | 3rd year         | 1/ 963 ( 0.1%)  | 3/1012 ( 0.3%)  | 4/1975 ( 0.2%)  |
|                                                                     | Overall          | 7/1432 ( 0.5%)  | 6/1452 ( 0.4%)  | 13/2884 ( 0.5%) |
| Joint sprain                                                        | 1st year         | 7/1432 ( 0.5%)  | 3/1452 ( 0.2%)  | 10/2884 ( 0.3%) |
|                                                                     | 2nd year         | 3/1166 ( 0.3%)  | 0/1206          | 3/2372 ( 0.1%)  |
|                                                                     | 3rd year         | 3/ 963 ( 0.3%)  | 3/1012 ( 0.3%)  | 6/1975 ( 0.3%)  |
|                                                                     | Overall          | 13/1432 ( 0.9%) | 6/1452 ( 0.4%)  | 19/2884 ( 0.7%) |
| Laceration                                                          | 1st year         | 1/1432 ( <0.1%) | 2/1452 ( 0.1%)  | 3/2884 ( 0.1%)  |
|                                                                     | 2nd year         | 1/1166 ( <0.1%) | 0/1206          | 1/2372 ( <0.1%) |
|                                                                     | 3rd year         | 1/ 963 ( 0.1%)  | 0/1012          | 1/1975 ( <0.1%) |
|                                                                     | Overall          | 3/1432 ( 0.2%)  | 2/1452 ( 0.1%)  | 5/2884 ( 0.2%)  |
| Laryngeal injury                                                    | 1st year         | 1/1432 ( <0.1%) | 0/1452          | 1/2884 ( <0.1%) |
|                                                                     | Overall          | 1/1432 ( <0.1%) | 0/1452          | 1/2884 ( <0.1%) |

**Table 14.3.1 / 9: Number of subjects with adverse events by primary system organ class, preferred term and year (FAS)**

| Primary system organ class<br>Preferred term<br>MedDRA version 14.0 | YEAR OF<br>ONSET | LCS12          |  | LCS16           |  | Total           |
|---------------------------------------------------------------------|------------------|----------------|--|-----------------|--|-----------------|
|                                                                     |                  |                |  |                 |  |                 |
| Ligament rupture                                                    | 1st year         | 2/1432 ( 0.1%) |  | 1/1452 (<0.1%)  |  | 3/2884 ( 0.1%)  |
|                                                                     | 3rd year         | 1/ 963 ( 0.1%) |  | 0/1012          |  | 1/1975 (<0.1%)  |
|                                                                     | Overall          | 3/1432 ( 0.2%) |  | 1/1452 (<0.1%)  |  | 4/2884 ( 0.1%)  |
| Ligament sprain                                                     | 2nd year         | 0/1166         |  | 1/1206 (<0.1%)  |  | 1/2372 (<0.1%)  |
|                                                                     | Overall          | 0/1432         |  | 1/1452 (<0.1%)  |  | 1/2884 (<0.1%)  |
| Limb crushing injury                                                | 3rd year         | 1/ 963 ( 0.1%) |  | 0/1012          |  | 1/1975 (<0.1%)  |
|                                                                     | Overall          | 1/1432 (<0.1%) |  | 0/1452          |  | 1/2884 (<0.1%)  |
| Limb injury                                                         | 1st year         | 0/1432         |  | 3/1452 ( 0.2%)  |  | 3/2884 ( 0.1%)  |
|                                                                     | 3rd year         | 1/ 963 ( 0.1%) |  | 1/1012 (<0.1%)  |  | 2/1975 ( 0.1%)  |
|                                                                     | Overall          | 1/1432 (<0.1%) |  | 4/1452 ( 0.3%)  |  | 5/2884 ( 0.2%)  |
| Lower limb fracture                                                 | 3rd year         | 1/ 963 ( 0.1%) |  | 0/1012          |  | 1/1975 (<0.1%)  |
|                                                                     | Overall          | 1/1432 (<0.1%) |  | 0/1452          |  | 1/2884 (<0.1%)  |
| Lumbar vertebral fracture                                           | 3rd year         | 0/ 963         |  | 1/1012 (<0.1%)  |  | 1/1975 (<0.1%)  |
|                                                                     | Overall          | 0/1432         |  | 1/1452 (<0.1%)  |  | 1/2884 (<0.1%)  |
| Meniscus lesion                                                     | 1st year         | 1/1432 (<0.1%) |  | 0/1452          |  | 1/2884 (<0.1%)  |
|                                                                     | 2nd year         | 1/1166 (<0.1%) |  | 0/1206          |  | 1/2372 (<0.1%)  |
|                                                                     | 3rd year         | 1/ 963 ( 0.1%) |  | 0/1012          |  | 1/1975 (<0.1%)  |
|                                                                     | Overall          | 3/1432 ( 0.2%) |  | 0/1452          |  | 3/2884 ( 0.1%)  |
| Muscle injury                                                       | 1st year         | 3/1432 ( 0.2%) |  | 1/1452 (<0.1%)  |  | 4/2884 ( 0.1%)  |
|                                                                     | 2nd year         | 1/1166 (<0.1%) |  | 1/1206 (<0.1%)  |  | 2/2372 (<0.1%)  |
|                                                                     | 3rd year         | 1/ 963 ( 0.1%) |  | 0/1012          |  | 1/1975 (<0.1%)  |
|                                                                     | Overall          | 5/1432 ( 0.3%) |  | 2/1452 ( 0.1%)  |  | 7/2884 ( 0.2%)  |
| Muscle rupture                                                      | 2nd year         | 0/1166         |  | 1/1206 (<0.1%)  |  | 1/2372 (<0.1%)  |
|                                                                     | Overall          | 0/1432         |  | 1/1452 (<0.1%)  |  | 1/2884 (<0.1%)  |
| Muscle strain                                                       | 1st year         | 4/1432 ( 0.3%) |  | 5/1452 ( 0.3%)  |  | 9/2884 ( 0.3%)  |
|                                                                     | 2nd year         | 0/1166         |  | 1/1206 (<0.1%)  |  | 1/2372 (<0.1%)  |
|                                                                     | 3rd year         | 3/ 963 ( 0.3%) |  | 4/1012 ( 0.4%)  |  | 7/1975 ( 0.4%)  |
|                                                                     | Overall          | 7/1432 ( 0.5%) |  | 10/1452 ( 0.7%) |  | 17/2884 ( 0.6%) |
| Nail avulsion                                                       | 3rd year         | 1/ 963 ( 0.1%) |  | 0/1012          |  | 1/1975 (<0.1%)  |
|                                                                     | Overall          | 1/1432 (<0.1%) |  | 0/1452          |  | 1/2884 (<0.1%)  |

**Table 14.3.1 / 9: Number of subjects with adverse events by primary system organ class, preferred term and year (FAS)**

| Primary system organ class<br>Preferred term<br>MedDRA version 14.0 | YEAR OF<br>ONSET | LCS12           |  | LCS16           |  | Total            |
|---------------------------------------------------------------------|------------------|-----------------|--|-----------------|--|------------------|
|                                                                     |                  |                 |  |                 |  |                  |
| Overdose                                                            | 3rd year         | 1/ 963 ( 0.1%)  |  | 0/1012          |  | 1/1975 ( <0.1%)  |
|                                                                     | Overall          | 1/1432 ( <0.1%) |  | 0/1452          |  | 1/2884 ( <0.1%)  |
| Post concussion syndrome                                            | 2nd year         | 0/1166          |  | 1/1206 ( <0.1%) |  | 1/2372 ( <0.1%)  |
|                                                                     | Overall          | 0/1432          |  | 1/1452 ( <0.1%) |  | 1/2884 ( <0.1%)  |
| Post procedural haemorrhage                                         | 1st year         | 1/1432 ( <0.1%) |  | 1/1452 ( <0.1%) |  | 2/2884 ( <0.1%)  |
|                                                                     | 2nd year         | 1/1166 ( <0.1%) |  | 0/1206          |  | 1/2372 ( <0.1%)  |
|                                                                     | 3rd year         | 0/ 963          |  | 1/1012 ( <0.1%) |  | 1/1975 ( <0.1%)  |
|                                                                     | Overall          | 2/1432 ( 0.1%)  |  | 2/1452 ( 0.1%)  |  | 4/2884 ( 0.1%)   |
| Post-traumatic pain                                                 | 1st year         | 2/1432 ( 0.1%)  |  | 3/1452 ( 0.2%)  |  | 5/2884 ( 0.2%)   |
|                                                                     | 2nd year         | 1/1166 ( <0.1%) |  | 1/1206 ( <0.1%) |  | 2/2372 ( <0.1%)  |
|                                                                     | Overall          | 3/1432 ( 0.2%)  |  | 4/1452 ( 0.3%)  |  | 7/2884 ( 0.2%)   |
| Postoperative ileus                                                 | 3rd year         | 0/ 963          |  | 1/1012 ( <0.1%) |  | 1/1975 ( <0.1%)  |
|                                                                     | Overall          | 0/1432          |  | 1/1452 ( <0.1%) |  | 1/2884 ( <0.1%)  |
| Procedural pain                                                     | 1st year         | 48/1432 ( 3.4%) |  | 43/1452 ( 3.0%) |  | 91/2884 ( 3.2%)  |
|                                                                     | 2nd year         | 8/1166 ( 0.7%)  |  | 6/1206 ( 0.5%)  |  | 14/2372 ( 0.6%)  |
|                                                                     | 3rd year         | 4/ 963 ( 0.4%)  |  | 7/1012 ( 0.7%)  |  | 11/1975 ( 0.6%)  |
|                                                                     | Overall          | 58/1432 ( 4.1%) |  | 54/1452 ( 3.7%) |  | 112/2884 ( 3.9%) |
| Procedural vomiting                                                 | 1st year         | 1/1432 ( <0.1%) |  | 0/1452          |  | 1/2884 ( <0.1%)  |
|                                                                     | Overall          | 1/1432 ( <0.1%) |  | 0/1452          |  | 1/2884 ( <0.1%)  |
| Radius fracture                                                     | 1st year         | 0/1432          |  | 1/1452 ( <0.1%) |  | 1/2884 ( <0.1%)  |
|                                                                     | 2nd year         | 1/1166 ( <0.1%) |  | 0/1206          |  | 1/2372 ( <0.1%)  |
|                                                                     | Overall          | 1/1432 ( <0.1%) |  | 1/1452 ( <0.1%) |  | 2/2884 ( <0.1%)  |
| Rib fracture                                                        | 1st year         | 1/1432 ( <0.1%) |  | 1/1452 ( <0.1%) |  | 2/2884 ( <0.1%)  |
|                                                                     | 3rd year         | 0/ 963          |  | 1/1012 ( <0.1%) |  | 1/1975 ( <0.1%)  |
|                                                                     | Overall          | 1/1432 ( <0.1%) |  | 2/1452 ( 0.1%)  |  | 3/2884 ( 0.1%)   |
| Road traffic accident                                               | 1st year         | 3/1432 ( 0.2%)  |  | 0/1452          |  | 3/2884 ( 0.1%)   |
|                                                                     | 3rd year         | 0/ 963          |  | 2/1012 ( 0.2%)  |  | 2/1975 ( 0.1%)   |
|                                                                     | Overall          | 3/1432 ( 0.2%)  |  | 2/1452 ( 0.1%)  |  | 5/2884 ( 0.2%)   |
| Seroma                                                              | 3rd year         | 1/ 963 ( 0.1%)  |  | 0/1012          |  | 1/1975 ( <0.1%)  |
|                                                                     | Overall          | 1/1432 ( <0.1%) |  | 0/1452          |  | 1/2884 ( <0.1%)  |

**Table 14.3.1 / 9: Number of subjects with adverse events by primary system organ class, preferred term and year (FAS)**

| Primary system organ class<br>Preferred term<br>MedDRA version 14.0 | YEAR OF<br>ONSET | YEAR OF         |                 | Total           |
|---------------------------------------------------------------------|------------------|-----------------|-----------------|-----------------|
|                                                                     |                  | LCS12           | LCS16           |                 |
| Shunt occlusion                                                     | 1st year         | 1/1432 ( <0.1%) | 0/1452          | 1/2884 ( <0.1%) |
|                                                                     | Overall          | 1/1432 ( <0.1%) | 0/1452          | 1/2884 ( <0.1%) |
| Skeletal injury                                                     | 3rd year         | 0/ 963          | 1/1012 ( <0.1%) | 1/1975 ( <0.1%) |
|                                                                     | Overall          | 0/1432          | 1/1452 ( <0.1%) | 1/2884 ( <0.1%) |
| Skin injury                                                         | 2nd year         | 0/1166          | 1/1206 ( <0.1%) | 1/2372 ( <0.1%) |
|                                                                     | Overall          | 0/1432          | 1/1452 ( <0.1%) | 1/2884 ( <0.1%) |
| Spinal column injury                                                | 1st year         | 0/1432          | 2/1452 ( 0.1%)  | 2/2884 ( <0.1%) |
|                                                                     | Overall          | 0/1432          | 2/1452 ( 0.1%)  | 2/2884 ( <0.1%) |
| Stress fracture                                                     | 2nd year         | 0/1166          | 1/1206 ( <0.1%) | 1/2372 ( <0.1%) |
|                                                                     | Overall          | 0/1432          | 1/1452 ( <0.1%) | 1/2884 ( <0.1%) |
| Subdural haematoma                                                  | 1st year         | 1/1432 ( <0.1%) | 0/1452          | 1/2884 ( <0.1%) |
|                                                                     | Overall          | 1/1432 ( <0.1%) | 0/1452          | 1/2884 ( <0.1%) |
| Tendon injury                                                       | 1st year         | 0/1432          | 1/1452 ( <0.1%) | 1/2884 ( <0.1%) |
|                                                                     | Overall          | 0/1432          | 1/1452 ( <0.1%) | 1/2884 ( <0.1%) |
| Tendon rupture                                                      | 1st year         | 1/1432 ( <0.1%) | 1/1452 ( <0.1%) | 2/2884 ( <0.1%) |
|                                                                     | 3rd year         | 2/ 963 ( 0.2%)  | 0/1012          | 2/1975 ( 0.1%)  |
|                                                                     | Overall          | 3/1432 ( 0.2%)  | 1/1452 ( <0.1%) | 4/2884 ( 0.1%)  |
| Thermal burn                                                        | 2nd year         | 0/1166          | 1/1206 ( <0.1%) | 1/2372 ( <0.1%) |
|                                                                     | 3rd year         | 0/ 963          | 2/1012 ( 0.2%)  | 2/1975 ( 0.1%)  |
|                                                                     | Overall          | 0/1432          | 3/1452 ( 0.2%)  | 3/2884 ( 0.1%)  |
| Tibia fracture                                                      | 2nd year         | 1/1166 ( <0.1%) | 1/1206 ( <0.1%) | 2/2372 ( <0.1%) |
|                                                                     | Overall          | 1/1432 ( <0.1%) | 1/1452 ( <0.1%) | 2/2884 ( <0.1%) |
| Traumatic fracture                                                  | 1st year         | 1/1432 ( <0.1%) | 0/1452          | 1/2884 ( <0.1%) |
|                                                                     | Overall          | 1/1432 ( <0.1%) | 0/1452          | 1/2884 ( <0.1%) |
| Upper limb fracture                                                 | 2nd year         | 1/1166 ( <0.1%) | 1/1206 ( <0.1%) | 2/2372 ( <0.1%) |
|                                                                     | 3rd year         | 0/ 963          | 1/1012 ( <0.1%) | 1/1975 ( <0.1%) |
|                                                                     | Overall          | 1/1432 ( <0.1%) | 2/1452 ( 0.1%)  | 3/2884 ( 0.1%)  |



**Table 14.3.1 / 9: Number of subjects with adverse events by primary system organ class, preferred term and year (FAS)**

| Primary system organ class<br>Preferred term<br>MedDRA version 14.0 | YEAR OF<br>ONSET | LCS               |                   | Total             |
|---------------------------------------------------------------------|------------------|-------------------|-------------------|-------------------|
|                                                                     |                  | LCS12             | LCS16             |                   |
| Vulval laceration                                                   | 3rd year         | 0/ 963            | 1/1012 ( <0.1%)   | 1/1975 ( <0.1%)   |
|                                                                     | Overall          | 0/1432            | 1/1452 ( <0.1%)   | 1/2884 ( <0.1%)   |
| Whiplash injury                                                     | 1st year         | 1/1432 ( <0.1%)   | 2/1452 ( 0.1%)    | 3/2884 ( 0.1%)    |
|                                                                     | 2nd year         | 0/1166            | 2/1206 ( 0.2%)    | 2/2372 ( <0.1%)   |
|                                                                     | 3rd year         | 0/ 963            | 1/1012 ( <0.1%)   | 1/1975 ( <0.1%)   |
|                                                                     | Overall          | 1/1432 ( <0.1%)   | 5/1452 ( 0.3%)    | 6/2884 ( 0.2%)    |
| Wound                                                               | 1st year         | 1/1432 ( <0.1%)   | 0/1452            | 1/2884 ( <0.1%)   |
|                                                                     | Overall          | 1/1432 ( <0.1%)   | 0/1452            | 1/2884 ( <0.1%)   |
| Wrist fracture                                                      | 1st year         | 0/1432            | 1/1452 ( <0.1%)   | 1/2884 ( <0.1%)   |
|                                                                     | 2nd year         | 0/1166            | 1/1206 ( <0.1%)   | 1/2372 ( <0.1%)   |
|                                                                     | Overall          | 0/1432            | 2/1452 ( 0.1%)    | 2/2884 ( <0.1%)   |
| Investigations                                                      | 1st year         | 57/1432 ( 4.0%)   | 64/1452 ( 4.4%)   | 121/2884 ( 4.2%)  |
|                                                                     | 2nd year         | 37/1166 ( 3.2%)   | 42/1206 ( 3.5%)   | 79/2372 ( 3.3%)   |
|                                                                     | 3rd year         | 61/ 963 ( 6.3%)   | 60/1012 ( 5.9%)   | 121/1975 ( 6.1%)  |
|                                                                     | Overall          | 150/1432 ( 10.5%) | 158/1452 ( 10.9%) | 308/2884 ( 10.7%) |
| Alanine aminotransferase increased                                  | 1st year         | 1/1432 ( <0.1%)   | 1/1452 ( <0.1%)   | 2/2884 ( <0.1%)   |
|                                                                     | 2nd year         | 1/1166 ( <0.1%)   | 1/1206 ( <0.1%)   | 2/2372 ( <0.1%)   |
|                                                                     | 3rd year         | 6/ 963 ( 0.6%)    | 8/1012 ( 0.8%)    | 14/1975 ( 0.7%)   |
|                                                                     | Overall          | 9/1432 ( 0.6%)    | 10/1452 ( 0.7%)   | 19/2884 ( 0.7%)   |
| Antibiotic resistant Staphylococcus test positive                   | 1st year         | 1/1432 ( <0.1%)   | 0/1452            | 1/2884 ( <0.1%)   |
|                                                                     | 3rd year         | 1/ 963 ( 0.1%)    | 0/1012            | 1/1975 ( <0.1%)   |
|                                                                     | Overall          | 2/1432 ( 0.1%)    | 0/1452            | 2/2884 ( <0.1%)   |
| Aspartate aminotransferase increased                                | 1st year         | 1/1432 ( <0.1%)   | 0/1452            | 1/2884 ( <0.1%)   |
|                                                                     | 2nd year         | 0/1166            | 1/1206 ( <0.1%)   | 1/2372 ( <0.1%)   |
|                                                                     | 3rd year         | 4/ 963 ( 0.4%)    | 3/1012 ( 0.3%)    | 7/1975 ( 0.4%)    |
|                                                                     | Overall          | 6/1432 ( 0.4%)    | 4/1452 ( 0.3%)    | 10/2884 ( 0.3%)   |
| Biopsy muscle                                                       | 1st year         | 1/1432 ( <0.1%)   | 0/1452            | 1/2884 ( <0.1%)   |
|                                                                     | Overall          | 1/1432 ( <0.1%)   | 0/1452            | 1/2884 ( <0.1%)   |
| Blood alkaline phosphatase decreased                                | 3rd year         | 1/ 963 ( 0.1%)    | 0/1012            | 1/1975 ( <0.1%)   |
|                                                                     | Overall          | 1/1432 ( <0.1%)   | 0/1452            | 1/2884 ( <0.1%)   |

**Table 14.3.1 / 9: Number of subjects with adverse events by primary system organ class, preferred term and year (FAS)**

| Primary system organ class<br>Preferred term<br>MedDRA version 14.0 | YEAR OF<br>ONSET | LCS12           | LCS16           | Total           |
|---------------------------------------------------------------------|------------------|-----------------|-----------------|-----------------|
| Blood amylase increased                                             | 1st year         | 0/1432          | 1/1452 ( <0.1%) | 1/2884 ( <0.1%) |
|                                                                     | Overall          | 0/1432          | 1/1452 ( <0.1%) | 1/2884 ( <0.1%) |
| Blood cholesterol increased                                         | 1st year         | 3/1432 ( 0.2%)  | 0/1452          | 3/2884 ( 0.1%)  |
|                                                                     | 3rd year         | 0/ 963          | 1/1012 ( <0.1%) | 1/1975 ( <0.1%) |
|                                                                     | Overall          | 3/1432 ( 0.2%)  | 1/1452 ( <0.1%) | 4/2884 ( 0.1%)  |
| Blood iron decreased                                                | 1st year         | 0/1432          | 1/1452 ( <0.1%) | 1/2884 ( <0.1%) |
|                                                                     | Overall          | 0/1432          | 1/1452 ( <0.1%) | 1/2884 ( <0.1%) |
| Blood potassium abnormal                                            | 3rd year         | 1/ 963 ( 0.1%)  | 0/1012          | 1/1975 ( <0.1%) |
|                                                                     | Overall          | 1/1432 ( <0.1%) | 0/1452          | 1/2884 ( <0.1%) |
| Blood potassium increased                                           | 1st year         | 0/1432          | 1/1452 ( <0.1%) | 1/2884 ( <0.1%) |
|                                                                     | Overall          | 0/1432          | 1/1452 ( <0.1%) | 1/2884 ( <0.1%) |
| Blood pressure diastolic increased                                  | 1st year         | 0/1432          | 1/1452 ( <0.1%) | 1/2884 ( <0.1%) |
|                                                                     | Overall          | 0/1432          | 1/1452 ( <0.1%) | 1/2884 ( <0.1%) |
| Blood pressure increased                                            | 2nd year         | 2/1166 ( 0.2%)  | 0/1206          | 2/2372 ( <0.1%) |
|                                                                     | 3rd year         | 1/ 963 ( 0.1%)  | 1/1012 ( <0.1%) | 2/1975 ( 0.1%)  |
|                                                                     | Overall          | 3/1432 ( 0.2%)  | 1/1452 ( <0.1%) | 4/2884 ( 0.1%)  |
| Blood pressure systolic increased                                   | 2nd year         | 0/1166          | 1/1206 ( <0.1%) | 1/2372 ( <0.1%) |
|                                                                     | Overall          | 0/1432          | 1/1452 ( <0.1%) | 1/2884 ( <0.1%) |
| Blood sodium decreased                                              | 3rd year         | 1/ 963 ( 0.1%)  | 0/1012          | 1/1975 ( <0.1%) |
|                                                                     | Overall          | 1/1432 ( <0.1%) | 0/1452          | 1/2884 ( <0.1%) |
| Blood triglycerides increased                                       | 1st year         | 1/1432 ( <0.1%) | 1/1452 ( <0.1%) | 2/2884 ( <0.1%) |
|                                                                     | 3rd year         | 0/ 963          | 4/1012 ( 0.4%)  | 4/1975 ( 0.2%)  |
|                                                                     | Overall          | 1/1432 ( <0.1%) | 5/1452 ( 0.3%)  | 6/2884 ( 0.2%)  |
| Blood urine present                                                 | 3rd year         | 3/ 963 ( 0.3%)  | 1/1012 ( <0.1%) | 4/1975 ( 0.2%)  |
|                                                                     | Overall          | 3/1432 ( 0.2%)  | 1/1452 ( <0.1%) | 4/2884 ( 0.1%)  |
| Carbohydrate antigen 125 increased                                  | 3rd year         | 1/ 963 ( 0.1%)  | 0/1012          | 1/1975 ( <0.1%) |
|                                                                     | Overall          | 1/1432 ( <0.1%) | 0/1452          | 1/2884 ( <0.1%) |

**Table 14.3.1 / 9: Number of subjects with adverse events by primary system organ class, preferred term and year (FAS)**

| Primary system organ class<br>Preferred term<br>MedDRA version 14.0 | YEAR OF<br>ONSET | YEAR OF         |                 | Total           |
|---------------------------------------------------------------------|------------------|-----------------|-----------------|-----------------|
|                                                                     |                  | LCS12           | LCS16           |                 |
| Cardiac murmur                                                      | 2nd year         | 1/1166 ( <0.1%) | 0/1206          | 1/2372 ( <0.1%) |
|                                                                     | Overall          | 1/1432 ( <0.1%) | 0/1452          | 1/2884 ( <0.1%) |
| Chlamydia test positive                                             | 1st year         | 2/1432 ( 0.1%)  | 0/1452          | 2/2884 ( <0.1%) |
|                                                                     | 2nd year         | 2/1166 ( 0.2%)  | 1/1206 ( <0.1%) | 3/2372 ( 0.1%)  |
|                                                                     | 3rd year         | 3/ 963 ( 0.3%)  | 0/1012          | 3/1975 ( 0.2%)  |
|                                                                     | Overall          | 7/1432 ( 0.5%)  | 1/1452 ( <0.1%) | 8/2884 ( 0.3%)  |
| Escherichia test positive                                           | 3rd year         | 1/ 963 ( 0.1%)  | 0/1012          | 1/1975 ( <0.1%) |
|                                                                     | Overall          | 1/1432 ( <0.1%) | 0/1452          | 1/2884 ( <0.1%) |
| Gamma-glutamyltransferase increased                                 | 1st year         | 0/1432          | 2/1452 ( 0.1%)  | 2/2884 ( <0.1%) |
|                                                                     | 2nd year         | 0/1166          | 1/1206 ( <0.1%) | 1/2372 ( <0.1%) |
|                                                                     | 3rd year         | 4/ 963 ( 0.4%)  | 10/1012 ( 1.0%) | 14/1975 ( 0.7%) |
|                                                                     | Overall          | 4/1432 ( 0.3%)  | 13/1452 ( 0.9%) | 17/2884 ( 0.6%) |
| Gastric pH decreased                                                | 2nd year         | 0/1166          | 1/1206 ( <0.1%) | 1/2372 ( <0.1%) |
|                                                                     | Overall          | 0/1432          | 1/1452 ( <0.1%) | 1/2884 ( <0.1%) |
| Glucose urine present                                               | 3rd year         | 0/ 963          | 1/1012 ( <0.1%) | 1/1975 ( <0.1%) |
|                                                                     | Overall          | 0/1432          | 1/1452 ( <0.1%) | 1/2884 ( <0.1%) |
| Glycosylated haemoglobin increased                                  | 2nd year         | 1/1166 ( <0.1%) | 0/1206          | 1/2372 ( <0.1%) |
|                                                                     | 3rd year         | 4/ 963 ( 0.4%)  | 0/1012          | 4/1975 ( 0.2%)  |
|                                                                     | Overall          | 5/1432 ( 0.3%)  | 0/1452          | 5/2884 ( 0.2%)  |
| Haematocrit decreased                                               | 1st year         | 1/1432 ( <0.1%) | 0/1452          | 1/2884 ( <0.1%) |
|                                                                     | 2nd year         | 0/1166          | 1/1206 ( <0.1%) | 1/2372 ( <0.1%) |
|                                                                     | Overall          | 1/1432 ( <0.1%) | 1/1452 ( <0.1%) | 2/2884 ( <0.1%) |
| Haematocrit increased                                               | 2nd year         | 1/1166 ( <0.1%) | 0/1206          | 1/2372 ( <0.1%) |
|                                                                     | 3rd year         | 1/ 963 ( 0.1%)  | 2/1012 ( 0.2%)  | 3/1975 ( 0.2%)  |
|                                                                     | Overall          | 2/1432 ( 0.1%)  | 2/1452 ( 0.1%)  | 4/2884 ( 0.1%)  |
| Haemoglobin decreased                                               | 1st year         | 2/1432 ( 0.1%)  | 0/1452          | 2/2884 ( <0.1%) |
|                                                                     | 2nd year         | 1/1166 ( <0.1%) | 2/1206 ( 0.2%)  | 3/2372 ( 0.1%)  |
|                                                                     | 3rd year         | 2/ 963 ( 0.2%)  | 3/1012 ( 0.3%)  | 5/1975 ( 0.3%)  |
|                                                                     | Overall          | 5/1432 ( 0.3%)  | 5/1452 ( 0.3%)  | 10/2884 ( 0.3%) |

**Table 14.3.1 / 9: Number of subjects with adverse events by primary system organ class, preferred term and year (FAS)**

| Primary system organ class<br>Preferred term<br>MedDRA version 14.0 | YEAR OF<br>ONSET | LCS            |                | Total           |
|---------------------------------------------------------------------|------------------|----------------|----------------|-----------------|
|                                                                     |                  | LCS12          | LCS16          |                 |
| Heart rate increased                                                | 1st year         | 0/1432         | 1/1452 (<0.1%) | 1/2884 (<0.1%)  |
|                                                                     | Overall          | 0/1432         | 1/1452 (<0.1%) | 1/2884 (<0.1%)  |
| Hepatic enzyme increased                                            | 1st year         | 1/1432 (<0.1%) | 1/1452 (<0.1%) | 2/2884 (<0.1%)  |
|                                                                     | Overall          | 1/1432 (<0.1%) | 1/1452 (<0.1%) | 2/2884 (<0.1%)  |
| High density lipoprotein decreased                                  | 1st year         | 0/1432         | 1/1452 (<0.1%) | 1/2884 (<0.1%)  |
|                                                                     | 3rd year         | 3/ 963 ( 0.3%) | 5/1012 ( 0.5%) | 8/1975 ( 0.4%)  |
|                                                                     | Overall          | 3/1432 ( 0.2%) | 6/1452 ( 0.4%) | 9/2884 ( 0.3%)  |
| High density lipoprotein increased                                  | 3rd year         | 0/ 963         | 1/1012 (<0.1%) | 1/1975 (<0.1%)  |
|                                                                     | Overall          | 0/1432         | 1/1452 (<0.1%) | 1/2884 (<0.1%)  |
| Human papilloma virus test positive                                 | 1st year         | 1/1432 (<0.1%) | 2/1452 ( 0.1%) | 3/2884 ( 0.1%)  |
|                                                                     | 2nd year         | 3/1166 ( 0.3%) | 1/1206 (<0.1%) | 4/2372 ( 0.2%)  |
|                                                                     | 3rd year         | 1/ 963 ( 0.1%) | 2/1012 ( 0.2%) | 3/1975 ( 0.2%)  |
|                                                                     | Overall          | 5/1432 ( 0.3%) | 5/1452 ( 0.3%) | 10/2884 ( 0.3%) |
| Liver function test abnormal                                        | 1st year         | 0/1432         | 1/1452 (<0.1%) | 1/2884 (<0.1%)  |
|                                                                     | 3rd year         | 0/ 963         | 1/1012 (<0.1%) | 1/1975 (<0.1%)  |
|                                                                     | Overall          | 0/1432         | 2/1452 ( 0.1%) | 2/2884 (<0.1%)  |
| Low density lipoprotein increased                                   | 1st year         | 1/1432 (<0.1%) | 1/1452 (<0.1%) | 2/2884 (<0.1%)  |
|                                                                     | 3rd year         | 0/ 963         | 1/1012 (<0.1%) | 1/1975 (<0.1%)  |
|                                                                     | Overall          | 1/1432 (<0.1%) | 2/1452 ( 0.1%) | 3/2884 ( 0.1%)  |
| Neisseria test positive                                             | 1st year         | 1/1432 (<0.1%) | 0/1452         | 1/2884 (<0.1%)  |
|                                                                     | 2nd year         | 1/1166 (<0.1%) | 0/1206         | 1/2372 (<0.1%)  |
|                                                                     | Overall          | 2/1432 ( 0.1%) | 0/1452         | 2/2884 (<0.1%)  |
| Platelet count decreased                                            | 3rd year         | 2/ 963 ( 0.2%) | 3/1012 ( 0.3%) | 5/1975 ( 0.3%)  |
|                                                                     | Overall          | 2/1432 ( 0.1%) | 3/1452 ( 0.2%) | 5/2884 ( 0.2%)  |
| Protein total decreased                                             | 3rd year         | 0/ 963         | 1/1012 (<0.1%) | 1/1975 (<0.1%)  |
|                                                                     | Overall          | 0/1432         | 1/1452 (<0.1%) | 1/2884 (<0.1%)  |
| Protein urine present                                               | 3rd year         | 1/ 963 ( 0.1%) | 1/1012 (<0.1%) | 2/1975 ( 0.1%)  |
|                                                                     | Overall          | 1/1432 (<0.1%) | 1/1452 (<0.1%) | 2/2884 (<0.1%)  |

**Table 14.3.1 / 9: Number of subjects with adverse events by primary system organ class, preferred term and year (FAS)**

| Primary system organ class<br>Preferred term<br>MedDRA version 14.0 | YEAR OF<br>ONSET | LCS12           | LCS16           | Total           |
|---------------------------------------------------------------------|------------------|-----------------|-----------------|-----------------|
| Red blood cell count decreased                                      | 2nd year         | 0/1166          | 1/1206 ( <0.1%) | 1/2372 ( <0.1%) |
|                                                                     | 3rd year         | 0/ 963          | 1/1012 ( <0.1%) | 1/1975 ( <0.1%) |
|                                                                     | Overall          | 0/1432          | 2/1452 ( 0.1%)  | 2/2884 ( <0.1%) |
| Red blood cell count increased                                      | 2nd year         | 1/1166 ( <0.1%) | 0/1206          | 1/2372 ( <0.1%) |
|                                                                     | Overall          | 1/1432 ( <0.1%) | 0/1452          | 1/2884 ( <0.1%) |
| Simplex virus test positive                                         | 1st year         | 0/1432          | 1/1452 ( <0.1%) | 1/2884 ( <0.1%) |
|                                                                     | 2nd year         | 1/1166 ( <0.1%) | 0/1206          | 1/2372 ( <0.1%) |
|                                                                     | 3rd year         | 1/ 963 ( 0.1%)  | 0/1012          | 1/1975 ( <0.1%) |
|                                                                     | Overall          | 2/1432 ( 0.1%)  | 1/1452 ( <0.1%) | 3/2884 ( 0.1%)  |
| Smear cervix abnormal                                               | 1st year         | 2/1432 ( 0.1%)  | 7/1452 ( 0.5%)  | 9/2884 ( 0.3%)  |
|                                                                     | 2nd year         | 9/1166 ( 0.8%)  | 9/1206 ( 0.7%)  | 18/2372 ( 0.8%) |
|                                                                     | 3rd year         | 7/ 963 ( 0.7%)  | 12/1012 ( 1.2%) | 19/1975 ( 1.0%) |
|                                                                     | Overall          | 18/1432 ( 1.3%) | 28/1452 ( 1.9%) | 46/2884 ( 1.6%) |
| Streptococcus test positive                                         | 2nd year         | 1/1166 ( <0.1%) | 0/1206          | 1/2372 ( <0.1%) |
|                                                                     | Overall          | 1/1432 ( <0.1%) | 0/1452          | 1/2884 ( <0.1%) |
| Transaminases increased                                             | 2nd year         | 0/1166          | 1/1206 ( <0.1%) | 1/2372 ( <0.1%) |
|                                                                     | Overall          | 0/1432          | 1/1452 ( <0.1%) | 1/2884 ( <0.1%) |
| Ultrasound ovary abnormal                                           | 2nd year         | 1/1166 ( <0.1%) | 0/1206          | 1/2372 ( <0.1%) |
|                                                                     | Overall          | 1/1432 ( <0.1%) | 0/1452          | 1/2884 ( <0.1%) |
| Urine leukocyte esterase positive                                   | 1st year         | 0/1432          | 1/1452 ( <0.1%) | 1/2884 ( <0.1%) |
|                                                                     | Overall          | 0/1432          | 1/1452 ( <0.1%) | 1/2884 ( <0.1%) |
| Vitamin D decreased                                                 | 3rd year         | 0/ 963          | 1/1012 ( <0.1%) | 1/1975 ( <0.1%) |
|                                                                     | Overall          | 0/1432          | 1/1452 ( <0.1%) | 1/2884 ( <0.1%) |
| Weight decreased                                                    | 1st year         | 2/1432 ( 0.1%)  | 3/1452 ( 0.2%)  | 5/2884 ( 0.2%)  |
|                                                                     | 2nd year         | 3/1166 ( 0.3%)  | 3/1206 ( 0.2%)  | 6/2372 ( 0.3%)  |
|                                                                     | 3rd year         | 4/ 963 ( 0.4%)  | 1/1012 ( <0.1%) | 5/1975 ( 0.3%)  |
|                                                                     | Overall          | 9/1432 ( 0.6%)  | 7/1452 ( 0.5%)  | 16/2884 ( 0.6%) |

**Table 14.3.1 / 9: Number of subjects with adverse events by primary system organ class, preferred term and year (FAS)**

| Primary system organ class<br>Preferred term<br>MedDRA version 14.0 | YEAR OF<br>ONSET | LCS12           | LCS16           | Total            |
|---------------------------------------------------------------------|------------------|-----------------|-----------------|------------------|
| Weight increased                                                    | 1st year         | 39/1432 ( 2.7%) | 41/1452 ( 2.8%) | 80/2884 ( 2.8%)  |
|                                                                     | 2nd year         | 11/1166 ( 0.9%) | 22/1206 ( 1.8%) | 33/2372 ( 1.4%)  |
|                                                                     | 3rd year         | 7/ 963 ( 0.7%)  | 5/1012 ( 0.5%)  | 12/1975 ( 0.6%)  |
|                                                                     | Overall          | 56/1432 ( 3.9%) | 68/1452 ( 4.7%) | 124/2884 ( 4.3%) |
| White blood cell count decreased                                    | 3rd year         | 4/ 963 ( 0.4%)  | 2/1012 ( 0.2%)  | 6/1975 ( 0.3%)   |
|                                                                     | Overall          | 4/1432 ( 0.3%)  | 2/1452 ( 0.1%)  | 6/2884 ( 0.2%)   |
| White blood cell count increased                                    | 2nd year         | 1/1166 (<0.1%)  | 0/1206          | 1/2372 (<0.1%)   |
|                                                                     | 3rd year         | 4/ 963 ( 0.4%)  | 2/1012 ( 0.2%)  | 6/1975 ( 0.3%)   |
|                                                                     | Overall          | 5/1432 ( 0.3%)  | 2/1452 ( 0.1%)  | 7/2884 ( 0.2%)   |
| White blood cells urine positive                                    | 2nd year         | 1/1166 (<0.1%)  | 0/1206          | 1/2372 (<0.1%)   |
|                                                                     | 3rd year         | 2/ 963 ( 0.2%)  | 2/1012 ( 0.2%)  | 4/1975 ( 0.2%)   |
|                                                                     | Overall          | 3/1432 ( 0.2%)  | 2/1452 ( 0.1%)  | 5/2884 ( 0.2%)   |
| Metabolism and nutrition disorders                                  | 1st year         | 11/1432 ( 0.8%) | 11/1452 ( 0.8%) | 22/2884 ( 0.8%)  |
|                                                                     | 2nd year         | 2/1166 ( 0.2%)  | 4/1206 ( 0.3%)  | 6/2372 ( 0.3%)   |
|                                                                     | 3rd year         | 5/ 963 ( 0.5%)  | 3/1012 ( 0.3%)  | 8/1975 ( 0.4%)   |
|                                                                     | Overall          | 18/1432 ( 1.3%) | 17/1452 ( 1.2%) | 35/2884 ( 1.2%)  |
| Abnormal loss of weight                                             | 1st year         | 0/1432          | 1/1452 (<0.1%)  | 1/2884 (<0.1%)   |
|                                                                     | Overall          | 0/1432          | 1/1452 (<0.1%)  | 1/2884 (<0.1%)   |
| Abnormal weight gain                                                | 1st year         | 0/1432          | 1/1452 (<0.1%)  | 1/2884 (<0.1%)   |
|                                                                     | Overall          | 0/1432          | 1/1452 (<0.1%)  | 1/2884 (<0.1%)   |
| Cell death                                                          | 2nd year         | 1/1166 (<0.1%)  | 0/1206          | 1/2372 (<0.1%)   |
|                                                                     | Overall          | 1/1432 (<0.1%)  | 0/1452          | 1/2884 (<0.1%)   |
| Cholesterosis                                                       | 1st year         | 1/1432 (<0.1%)  | 0/1452          | 1/2884 (<0.1%)   |
|                                                                     | Overall          | 1/1432 (<0.1%)  | 0/1452          | 1/2884 (<0.1%)   |
| Decreased appetite                                                  | 1st year         | 0/1432          | 1/1452 (<0.1%)  | 1/2884 (<0.1%)   |
|                                                                     | 3rd year         | 2/ 963 ( 0.2%)  | 0/1012          | 2/1975 ( 0.1%)   |
|                                                                     | Overall          | 2/1432 ( 0.1%)  | 1/1452 (<0.1%)  | 3/2884 ( 0.1%)   |
| Dehydration                                                         | 1st year         | 0/1432          | 1/1452 (<0.1%)  | 1/2884 (<0.1%)   |
|                                                                     | 3rd year         | 0/ 963          | 1/1012 (<0.1%)  | 1/1975 (<0.1%)   |
|                                                                     | Overall          | 0/1432          | 2/1452 ( 0.1%)  | 2/2884 (<0.1%)   |

**Table 14.3.1 / 9: Number of subjects with adverse events by primary system organ class, preferred term and year (FAS)**

| Primary system organ class<br>Preferred term<br>MedDRA version 14.0 | YEAR OF<br>ONSET | LCS             |                 | Total           |
|---------------------------------------------------------------------|------------------|-----------------|-----------------|-----------------|
|                                                                     |                  | LCS12           | LCS16           |                 |
| Diabetic ketoacidosis                                               | 2nd year         | 0/1166          | 1/1206 ( <0.1%) | 1/2372 ( <0.1%) |
|                                                                     | Overall          | 0/1432          | 1/1452 ( <0.1%) | 1/2884 ( <0.1%) |
| Dyslipidaemia                                                       | 3rd year         | 0/ 963          | 1/1012 ( <0.1%) | 1/1975 ( <0.1%) |
|                                                                     | Overall          | 0/1432          | 1/1452 ( <0.1%) | 1/2884 ( <0.1%) |
| Fluid retention                                                     | 1st year         | 3/1432 ( 0.2%)  | 2/1452 ( 0.1%)  | 5/2884 ( 0.2%)  |
|                                                                     | Overall          | 3/1432 ( 0.2%)  | 2/1452 ( 0.1%)  | 5/2884 ( 0.2%)  |
| Glucose tolerance impaired                                          | 3rd year         | 1/ 963 ( 0.1%)  | 0/1012          | 1/1975 ( <0.1%) |
|                                                                     | Overall          | 1/1432 ( <0.1%) | 0/1452          | 1/2884 ( <0.1%) |
| Hypokalaemia                                                        | 1st year         | 1/1432 ( <0.1%) | 0/1452          | 1/2884 ( <0.1%) |
|                                                                     | 3rd year         | 1/ 963 ( 0.1%)  | 0/1012          | 1/1975 ( <0.1%) |
|                                                                     | Overall          | 2/1432 ( 0.1%)  | 0/1452          | 2/2884 ( <0.1%) |
| Hyponatraemia                                                       | 1st year         | 1/1432 ( <0.1%) | 0/1452          | 1/2884 ( <0.1%) |
|                                                                     | Overall          | 1/1432 ( <0.1%) | 0/1452          | 1/2884 ( <0.1%) |
| Increased appetite                                                  | 1st year         | 1/1432 ( <0.1%) | 2/1452 ( 0.1%)  | 3/2884 ( 0.1%)  |
|                                                                     | Overall          | 1/1432 ( <0.1%) | 2/1452 ( 0.1%)  | 3/2884 ( 0.1%)  |
| Insulin resistance                                                  | 1st year         | 2/1432 ( 0.1%)  | 0/1452          | 2/2884 ( <0.1%) |
|                                                                     | 2nd year         | 0/1166          | 1/1206 ( <0.1%) | 1/2372 ( <0.1%) |
|                                                                     | Overall          | 2/1432 ( 0.1%)  | 1/1452 ( <0.1%) | 3/2884 ( 0.1%)  |
| Lactose intolerance                                                 | 1st year         | 2/1432 ( 0.1%)  | 0/1452          | 2/2884 ( <0.1%) |
|                                                                     | Overall          | 2/1432 ( 0.1%)  | 0/1452          | 2/2884 ( <0.1%) |
| Obesity                                                             | 1st year         | 0/1432          | 1/1452 ( <0.1%) | 1/2884 ( <0.1%) |
|                                                                     | Overall          | 0/1432          | 1/1452 ( <0.1%) | 1/2884 ( <0.1%) |
| Overweight                                                          | 1st year         | 0/1432          | 1/1452 ( <0.1%) | 1/2884 ( <0.1%) |
|                                                                     | Overall          | 0/1432          | 1/1452 ( <0.1%) | 1/2884 ( <0.1%) |
| Type 2 diabetes mellitus                                            | 2nd year         | 1/1166 ( <0.1%) | 0/1206          | 1/2372 ( <0.1%) |
|                                                                     | Overall          | 1/1432 ( <0.1%) | 0/1452          | 1/2884 ( <0.1%) |

**Table 14.3.1 / 9: Number of subjects with adverse events by primary system organ class, preferred term and year (FAS)**

| Primary system organ class<br>Preferred term<br>MedDRA version 14.0 | YEAR OF<br>ONSET | LCS12            | LCS16            | Total            |
|---------------------------------------------------------------------|------------------|------------------|------------------|------------------|
| Vitamin B12 deficiency                                              | 1st year         | 1/1432 (<0.1%)   | 0/1452           | 1/2884 (<0.1%)   |
|                                                                     | 2nd year         | 0/1166           | 1/1206 (<0.1%)   | 1/2372 (<0.1%)   |
|                                                                     | Overall          | 1/1432 (<0.1%)   | 1/1452 (<0.1%)   | 2/2884 (<0.1%)   |
| Vitamin D deficiency                                                | 2nd year         | 0/1166           | 1/1206 (<0.1%)   | 1/2372 (<0.1%)   |
|                                                                     | 3rd year         | 1/ 963 ( 0.1%)   | 1/1012 (<0.1%)   | 2/1975 ( 0.1%)   |
|                                                                     | Overall          | 1/1432 (<0.1%)   | 2/1452 ( 0.1%)   | 3/2884 ( 0.1%)   |
| Weight fluctuation                                                  | 1st year         | 0/1432           | 1/1452 (<0.1%)   | 1/2884 (<0.1%)   |
|                                                                     | Overall          | 0/1432           | 1/1452 (<0.1%)   | 1/2884 (<0.1%)   |
| Musculoskeletal and connective tissue disorders                     | 1st year         | 89/1432 ( 6.2%)  | 109/1452 ( 7.5%) | 198/2884 ( 6.9%) |
|                                                                     | 2nd year         | 37/1166 ( 3.2%)  | 50/1206 ( 4.1%)  | 87/2372 ( 3.7%)  |
|                                                                     | 3rd year         | 33/ 963 ( 3.4%)  | 55/1012 ( 5.4%)  | 88/1975 ( 4.5%)  |
|                                                                     | Overall          | 144/1432 (10.1%) | 187/1452 (12.9%) | 331/2884 (11.5%) |
| Ankylosing spondylitis                                              | 1st year         | 1/1432 (<0.1%)   | 0/1452           | 1/2884 (<0.1%)   |
|                                                                     | Overall          | 1/1432 (<0.1%)   | 0/1452           | 1/2884 (<0.1%)   |
| Arthralgia                                                          | 1st year         | 15/1432 ( 1.0%)  | 19/1452 ( 1.3%)  | 34/2884 ( 1.2%)  |
|                                                                     | 2nd year         | 4/1166 ( 0.3%)   | 8/1206 ( 0.7%)   | 12/2372 ( 0.5%)  |
|                                                                     | 3rd year         | 3/ 963 ( 0.3%)   | 5/1012 ( 0.5%)   | 8/1975 ( 0.4%)   |
|                                                                     | Overall          | 21/1432 ( 1.5%)  | 31/1452 ( 2.1%)  | 52/2884 ( 1.8%)  |
| Arthritis                                                           | 1st year         | 0/1432           | 1/1452 (<0.1%)   | 1/2884 (<0.1%)   |
|                                                                     | 2nd year         | 1/1166 (<0.1%)   | 2/1206 ( 0.2%)   | 3/2372 ( 0.1%)   |
|                                                                     | 3rd year         | 0/ 963           | 2/1012 ( 0.2%)   | 2/1975 ( 0.1%)   |
|                                                                     | Overall          | 1/1432 (<0.1%)   | 5/1452 ( 0.3%)   | 6/2884 ( 0.2%)   |
| Axillary mass                                                       | 2nd year         | 0/1166           | 1/1206 (<0.1%)   | 1/2372 (<0.1%)   |
|                                                                     | Overall          | 0/1432           | 1/1452 (<0.1%)   | 1/2884 (<0.1%)   |
| Back pain                                                           | 1st year         | 32/1432 ( 2.2%)  | 41/1452 ( 2.8%)  | 73/2884 ( 2.5%)  |
|                                                                     | 2nd year         | 11/1166 ( 0.9%)  | 15/1206 ( 1.2%)  | 26/2372 ( 1.1%)  |
|                                                                     | 3rd year         | 18/ 963 ( 1.9%)  | 14/1012 ( 1.4%)  | 32/1975 ( 1.6%)  |
|                                                                     | Overall          | 59/1432 ( 4.1%)  | 65/1452 ( 4.5%)  | 124/2884 ( 4.3%) |
| Bone pain                                                           | 1st year         | 1/1432 (<0.1%)   | 1/1452 (<0.1%)   | 2/2884 (<0.1%)   |
|                                                                     | 3rd year         | 0/ 963           | 2/1012 ( 0.2%)   | 2/1975 ( 0.1%)   |
|                                                                     | Overall          | 1/1432 (<0.1%)   | 3/1452 ( 0.2%)   | 4/2884 ( 0.1%)   |



**Table 14.3.1 / 9: Number of subjects with adverse events by primary system organ class, preferred term and year (FAS)**

| Primary system organ class<br>Preferred term<br>MedDRA version 14.0 | YEAR OF<br>ONSET | LCS12          | LCS16          | Total          |
|---------------------------------------------------------------------|------------------|----------------|----------------|----------------|
| Bursitis                                                            | 1st year         | 1/1432 (<0.1%) | 1/1452 (<0.1%) | 2/2884 (<0.1%) |
|                                                                     | 2nd year         | 1/1166 (<0.1%) | 0/1206         | 1/2372 (<0.1%) |
|                                                                     | Overall          | 2/1432 ( 0.1%) | 1/1452 (<0.1%) | 3/2884 ( 0.1%) |
| Compartment syndrome                                                | 2nd year         | 0/1166         | 1/1206 (<0.1%) | 1/2372 (<0.1%) |
|                                                                     | Overall          | 0/1432         | 1/1452 (<0.1%) | 1/2884 (<0.1%) |
| Costochondritis                                                     | 1st year         | 1/1432 (<0.1%) | 0/1452         | 1/2884 (<0.1%) |
|                                                                     | 2nd year         | 2/1166 ( 0.2%) | 0/1206         | 2/2372 (<0.1%) |
|                                                                     | 3rd year         | 0/ 963         | 1/1012 (<0.1%) | 1/1975 (<0.1%) |
|                                                                     | Overall          | 3/1432 ( 0.2%) | 1/1452 (<0.1%) | 4/2884 ( 0.1%) |
| Exostosis                                                           | 1st year         | 1/1432 (<0.1%) | 1/1452 (<0.1%) | 2/2884 (<0.1%) |
|                                                                     | 2nd year         | 0/1166         | 2/1206 ( 0.2%) | 2/2372 (<0.1%) |
|                                                                     | Overall          | 1/1432 (<0.1%) | 3/1452 ( 0.2%) | 4/2884 ( 0.1%) |
| Fibromyalgia                                                        | 1st year         | 1/1432 (<0.1%) | 0/1452         | 1/2884 (<0.1%) |
|                                                                     | 2nd year         | 0/1166         | 1/1206 (<0.1%) | 1/2372 (<0.1%) |
|                                                                     | 3rd year         | 0/ 963         | 1/1012 (<0.1%) | 1/1975 (<0.1%) |
|                                                                     | Overall          | 1/1432 (<0.1%) | 2/1452 ( 0.1%) | 3/2884 ( 0.1%) |
| Flank pain                                                          | 1st year         | 1/1432 (<0.1%) | 2/1452 ( 0.1%) | 3/2884 ( 0.1%) |
|                                                                     | 2nd year         | 1/1166 (<0.1%) | 0/1206         | 1/2372 (<0.1%) |
|                                                                     | 3rd year         | 0/ 963         | 1/1012 (<0.1%) | 1/1975 (<0.1%) |
|                                                                     | Overall          | 2/1432 ( 0.1%) | 3/1452 ( 0.2%) | 5/2884 ( 0.2%) |
| Groin pain                                                          | 1st year         | 2/1432 ( 0.1%) | 2/1452 ( 0.1%) | 4/2884 ( 0.1%) |
|                                                                     | 3rd year         | 0/ 963         | 2/1012 ( 0.2%) | 2/1975 ( 0.1%) |
|                                                                     | Overall          | 2/1432 ( 0.1%) | 4/1452 ( 0.3%) | 6/2884 ( 0.2%) |
| Hand deformity                                                      | 1st year         | 0/1432         | 1/1452 (<0.1%) | 1/2884 (<0.1%) |
|                                                                     | Overall          | 0/1432         | 1/1452 (<0.1%) | 1/2884 (<0.1%) |
| Intervertebral disc disorder                                        | 1st year         | 1/1432 (<0.1%) | 1/1452 (<0.1%) | 2/2884 (<0.1%) |
|                                                                     | Overall          | 1/1432 (<0.1%) | 1/1452 (<0.1%) | 2/2884 (<0.1%) |
| Intervertebral disc protrusion                                      | 2nd year         | 0/1166         | 2/1206 ( 0.2%) | 2/2372 (<0.1%) |
|                                                                     | 3rd year         | 1/ 963 ( 0.1%) | 1/1012 (<0.1%) | 2/1975 ( 0.1%) |
|                                                                     | Overall          | 1/1432 (<0.1%) | 3/1452 ( 0.2%) | 4/2884 ( 0.1%) |

**Table 14.3.1 / 9: Number of subjects with adverse events by primary system organ class, preferred term and year (FAS)**

| Primary system organ class<br>Preferred term<br>MedDRA version 14.0 | YEAR OF<br>ONSET | LCS12           | LCS16           | Total           |
|---------------------------------------------------------------------|------------------|-----------------|-----------------|-----------------|
| Joint effusion                                                      | 1st year         | 1/1432 ( <0.1%) | 0/1452          | 1/2884 ( <0.1%) |
|                                                                     | Overall          | 1/1432 ( <0.1%) | 0/1452          | 1/2884 ( <0.1%) |
| Joint instability                                                   | 1st year         | 1/1432 ( <0.1%) | 0/1452          | 1/2884 ( <0.1%) |
|                                                                     | 2nd year         | 0/1166          | 1/1206 ( <0.1%) | 1/2372 ( <0.1%) |
|                                                                     | 3rd year         | 0/ 963          | 1/1012 ( <0.1%) | 1/1975 ( <0.1%) |
|                                                                     | Overall          | 1/1432 ( <0.1%) | 1/1452 ( <0.1%) | 2/2884 ( <0.1%) |
| Joint stiffness                                                     | 2nd year         | 0/1166          | 1/1206 ( <0.1%) | 1/2372 ( <0.1%) |
|                                                                     | Overall          | 0/1432          | 1/1452 ( <0.1%) | 1/2884 ( <0.1%) |
| Joint swelling                                                      | 1st year         | 0/1432          | 1/1452 ( <0.1%) | 1/2884 ( <0.1%) |
|                                                                     | 3rd year         | 1/ 963 ( 0.1%)  | 0/1012          | 1/1975 ( <0.1%) |
|                                                                     | Overall          | 1/1432 ( <0.1%) | 1/1452 ( <0.1%) | 2/2884 ( <0.1%) |
| Loose body in joint                                                 | 2nd year         | 0/1166          | 1/1206 ( <0.1%) | 1/2372 ( <0.1%) |
|                                                                     | Overall          | 0/1432          | 1/1452 ( <0.1%) | 1/2884 ( <0.1%) |
| Medial tibial stress syndrome                                       | 1st year         | 1/1432 ( <0.1%) | 0/1452          | 1/2884 ( <0.1%) |
|                                                                     | 2nd year         | 1/1166 ( <0.1%) | 1/1206 ( <0.1%) | 2/2372 ( <0.1%) |
|                                                                     | 3rd year         | 0/ 963          | 1/1012 ( <0.1%) | 1/1975 ( <0.1%) |
|                                                                     | Overall          | 2/1432 ( 0.1%)  | 2/1452 ( 0.1%)  | 4/2884 ( 0.1%)  |
| Muscle contracture                                                  | 1st year         | 0/1432          | 1/1452 ( <0.1%) | 1/2884 ( <0.1%) |
|                                                                     | 2nd year         | 0/1166          | 1/1206 ( <0.1%) | 1/2372 ( <0.1%) |
|                                                                     | 3rd year         | 1/ 963 ( 0.1%)  | 0/1012          | 1/1975 ( <0.1%) |
|                                                                     | Overall          | 1/1432 ( <0.1%) | 2/1452 ( 0.1%)  | 3/2884 ( 0.1%)  |
| Muscle spasms                                                       | 1st year         | 3/1432 ( 0.2%)  | 6/1452 ( 0.4%)  | 9/2884 ( 0.3%)  |
|                                                                     | 2nd year         | 2/1166 ( 0.2%)  | 0/1206          | 2/2372 ( <0.1%) |
|                                                                     | 3rd year         | 0/ 963          | 2/1012 ( 0.2%)  | 2/1975 ( 0.1%)  |
|                                                                     | Overall          | 5/1432 ( 0.3%)  | 8/1452 ( 0.6%)  | 13/2884 ( 0.5%) |
| Muscle tightness                                                    | 1st year         | 4/1432 ( 0.3%)  | 4/1452 ( 0.3%)  | 8/2884 ( 0.3%)  |
|                                                                     | 2nd year         | 3/1166 ( 0.3%)  | 1/1206 ( <0.1%) | 4/2372 ( 0.2%)  |
|                                                                     | 3rd year         | 1/ 963 ( 0.1%)  | 6/1012 ( 0.6%)  | 7/1975 ( 0.4%)  |
|                                                                     | Overall          | 8/1432 ( 0.6%)  | 10/1452 ( 0.7%) | 18/2884 ( 0.6%) |

**Table 14.3.1 / 9: Number of subjects with adverse events by primary system organ class, preferred term and year (FAS)**

| Primary system organ class<br>Preferred term<br>MedDRA version 14.0 | YEAR OF<br>ONSET | LCS12           | LCS16           | Total           |
|---------------------------------------------------------------------|------------------|-----------------|-----------------|-----------------|
| Musculoskeletal chest pain                                          | 1st year         | 0/1432          | 2/1452 ( 0.1%)  | 2/2884 ( <0.1%) |
|                                                                     | 3rd year         | 2/ 963 ( 0.2%)  | 0/1012          | 2/1975 ( 0.1%)  |
|                                                                     | Overall          | 2/1432 ( 0.1%)  | 2/1452 ( 0.1%)  | 4/2884 ( 0.1%)  |
| Musculoskeletal discomfort                                          | 2nd year         | 0/1166          | 1/1206 ( <0.1%) | 1/2372 ( <0.1%) |
|                                                                     | Overall          | 0/1432          | 1/1452 ( <0.1%) | 1/2884 ( <0.1%) |
| Musculoskeletal pain                                                | 1st year         | 6/1432 ( 0.4%)  | 7/1452 ( 0.5%)  | 13/2884 ( 0.5%) |
|                                                                     | 2nd year         | 1/1166 ( <0.1%) | 4/1206 ( 0.3%)  | 5/2372 ( 0.2%)  |
|                                                                     | 3rd year         | 2/ 963 ( 0.2%)  | 1/1012 ( <0.1%) | 3/1975 ( 0.2%)  |
|                                                                     | Overall          | 9/1432 ( 0.6%)  | 11/1452 ( 0.8%) | 20/2884 ( 0.7%) |
| Musculoskeletal stiffness                                           | 2nd year         | 0/1166          | 1/1206 ( <0.1%) | 1/2372 ( <0.1%) |
|                                                                     | Overall          | 0/1432          | 1/1452 ( <0.1%) | 1/2884 ( <0.1%) |
| Myalgia                                                             | 1st year         | 7/1432 ( 0.5%)  | 8/1452 ( 0.6%)  | 15/2884 ( 0.5%) |
|                                                                     | 2nd year         | 2/1166 ( 0.2%)  | 2/1206 ( 0.2%)  | 4/2372 ( 0.2%)  |
|                                                                     | 3rd year         | 1/ 963 ( 0.1%)  | 2/1012 ( 0.2%)  | 3/1975 ( 0.2%)  |
|                                                                     | Overall          | 9/1432 ( 0.6%)  | 12/1452 ( 0.8%) | 21/2884 ( 0.7%) |
| Myositis                                                            | 1st year         | 0/1432          | 1/1452 ( <0.1%) | 1/2884 ( <0.1%) |
|                                                                     | Overall          | 0/1432          | 1/1452 ( <0.1%) | 1/2884 ( <0.1%) |
| Neck pain                                                           | 1st year         | 3/1432 ( 0.2%)  | 6/1452 ( 0.4%)  | 9/2884 ( 0.3%)  |
|                                                                     | 2nd year         | 5/1166 ( 0.4%)  | 2/1206 ( 0.2%)  | 7/2372 ( 0.3%)  |
|                                                                     | 3rd year         | 4/ 963 ( 0.4%)  | 2/1012 ( 0.2%)  | 6/1975 ( 0.3%)  |
|                                                                     | Overall          | 12/1432 ( 0.8%) | 10/1452 ( 0.7%) | 22/2884 ( 0.8%) |
| Osteitis                                                            | 1st year         | 1/1432 ( <0.1%) | 0/1452          | 1/2884 ( <0.1%) |
|                                                                     | 2nd year         | 1/1166 ( <0.1%) | 0/1206          | 1/2372 ( <0.1%) |
|                                                                     | Overall          | 2/1432 ( 0.1%)  | 0/1452          | 2/2884 ( <0.1%) |
| Osteoarthritis                                                      | 1st year         | 0/1432          | 2/1452 ( 0.1%)  | 2/2884 ( <0.1%) |
|                                                                     | Overall          | 0/1432          | 2/1452 ( 0.1%)  | 2/2884 ( <0.1%) |
| Osteochondrosis                                                     | 3rd year         | 0/ 963          | 2/1012 ( 0.2%)  | 2/1975 ( 0.1%)  |
|                                                                     | Overall          | 0/1432          | 2/1452 ( 0.1%)  | 2/2884 ( <0.1%) |
| Osteopenia                                                          | 2nd year         | 0/1166          | 1/1206 ( <0.1%) | 1/2372 ( <0.1%) |
|                                                                     | Overall          | 0/1432          | 1/1452 ( <0.1%) | 1/2884 ( <0.1%) |

**Table 14.3.1 / 9: Number of subjects with adverse events by primary system organ class, preferred term and year (FAS)**

| Primary system organ class<br>Preferred term<br>MedDRA version 14.0 | YEAR OF<br>ONSET | LCS12          | LCS16           | Total           |
|---------------------------------------------------------------------|------------------|----------------|-----------------|-----------------|
| Pain in extremity                                                   | 1st year         | 4/1432 ( 0.3%) | 8/1452 ( 0.6%)  | 12/2884 ( 0.4%) |
|                                                                     | 2nd year         | 1/1166 (<0.1%) | 3/1206 ( 0.2%)  | 4/2372 ( 0.2%)  |
|                                                                     | 3rd year         | 1/ 963 ( 0.1%) | 4/1012 ( 0.4%)  | 5/1975 ( 0.3%)  |
|                                                                     | Overall          | 6/1432 ( 0.4%) | 15/1452 ( 1.0%) | 21/2884 ( 0.7%) |
|                                                                     |                  |                |                 |                 |
| Pain in jaw                                                         | 3rd year         | 0/ 963         | 1/1012 (<0.1%)  | 1/1975 (<0.1%)  |
|                                                                     | Overall          | 0/1432         | 1/1452 (<0.1%)  | 1/2884 (<0.1%)  |
| Patellofemoral pain syndrome                                        | 1st year         | 1/1432 (<0.1%) | 0/1452          | 1/2884 (<0.1%)  |
|                                                                     | Overall          | 1/1432 (<0.1%) | 0/1452          | 1/2884 (<0.1%)  |
| Plantar fasciitis                                                   | 1st year         | 0/1432         | 1/1452 (<0.1%)  | 1/2884 (<0.1%)  |
|                                                                     | Overall          | 0/1432         | 1/1452 (<0.1%)  | 1/2884 (<0.1%)  |
| Psoriatic arthropathy                                               | 3rd year         | 1/ 963 ( 0.1%) | 0/1012          | 1/1975 (<0.1%)  |
|                                                                     | Overall          | 1/1432 (<0.1%) | 0/1452          | 1/2884 (<0.1%)  |
| Rotator cuff syndrome                                               | 1st year         | 1/1432 (<0.1%) | 1/1452 (<0.1%)  | 2/2884 (<0.1%)  |
|                                                                     | 2nd year         | 0/1166         | 3/1206 ( 0.2%)  | 3/2372 ( 0.1%)  |
|                                                                     | 3rd year         | 0/ 963         | 2/1012 ( 0.2%)  | 2/1975 ( 0.1%)  |
|                                                                     | Overall          | 1/1432 (<0.1%) | 6/1452 ( 0.4%)  | 7/2884 ( 0.2%)  |
| Scleroderma                                                         | 2nd year         | 1/1166 (<0.1%) | 0/1206          | 1/2372 (<0.1%)  |
|                                                                     | Overall          | 1/1432 (<0.1%) | 0/1452          | 1/2884 (<0.1%)  |
| Sensation of heaviness                                              | 3rd year         | 0/ 963         | 1/1012 (<0.1%)  | 1/1975 (<0.1%)  |
|                                                                     | Overall          | 0/1432         | 1/1452 (<0.1%)  | 1/2884 (<0.1%)  |
| Spinal osteoarthritis                                               | 2nd year         | 1/1166 (<0.1%) | 0/1206          | 1/2372 (<0.1%)  |
|                                                                     | Overall          | 1/1432 (<0.1%) | 0/1452          | 1/2884 (<0.1%)  |
| Synovitis                                                           | 1st year         | 1/1432 (<0.1%) | 0/1452          | 1/2884 (<0.1%)  |
|                                                                     | Overall          | 1/1432 (<0.1%) | 0/1452          | 1/2884 (<0.1%)  |
| Temporomandibular joint syndrome                                    | 1st year         | 1/1432 (<0.1%) | 0/1452          | 1/2884 (<0.1%)  |
|                                                                     | 3rd year         | 0/ 963         | 1/1012 (<0.1%)  | 1/1975 (<0.1%)  |
|                                                                     | Overall          | 1/1432 (<0.1%) | 1/1452 (<0.1%)  | 2/2884 (<0.1%)  |

**Table 14.3.1 / 9: Number of subjects with adverse events by primary system organ class, preferred term and year (FAS)**

| Primary system organ class<br>Preferred term<br>MedDRA version 14.0 | YEAR OF<br>ONSET | LCS12           | LCS16           | Total           |
|---------------------------------------------------------------------|------------------|-----------------|-----------------|-----------------|
| Tendon pain                                                         | 1st year         | 0/1432          | 1/1452 (<0.1%)  | 1/2884 (<0.1%)  |
|                                                                     | 2nd year         | 1/1166 (<0.1%)  | 0/1206          | 1/2372 (<0.1%)  |
|                                                                     | Overall          | 1/1432 (<0.1%)  | 1/1452 (<0.1%)  | 2/2884 (<0.1%)  |
| Tendonitis                                                          | 1st year         | 3/1432 ( 0.2%)  | 4/1452 ( 0.3%)  | 7/2884 ( 0.2%)  |
|                                                                     | 2nd year         | 2/1166 ( 0.2%)  | 0/1206          | 2/2372 (<0.1%)  |
|                                                                     | 3rd year         | 0/ 963          | 1/1012 (<0.1%)  | 1/1975 (<0.1%)  |
|                                                                     | Overall          | 5/1432 ( 0.3%)  | 5/1452 ( 0.3%)  | 10/2884 ( 0.3%) |
| Tenosynovitis                                                       | 1st year         | 0/1432          | 1/1452 (<0.1%)  | 1/2884 (<0.1%)  |
|                                                                     | 3rd year         | 0/ 963          | 1/1012 (<0.1%)  | 1/1975 (<0.1%)  |
|                                                                     | Overall          | 0/1432          | 1/1452 (<0.1%)  | 1/2884 (<0.1%)  |
| Torticollis                                                         | 1st year         | 1/1432 (<0.1%)  | 0/1452          | 1/2884 (<0.1%)  |
|                                                                     | 2nd year         | 0/1166          | 1/1206 (<0.1%)  | 1/2372 (<0.1%)  |
|                                                                     | 3rd year         | 0/ 963          | 1/1012 (<0.1%)  | 1/1975 (<0.1%)  |
|                                                                     | Overall          | 1/1432 (<0.1%)  | 2/1452 ( 0.1%)  | 3/2884 ( 0.1%)  |
| Neoplasms benign, malignant and unspecified (incl cysts and polyps) | 1st year         | 20/1432 ( 1.4%) | 17/1452 ( 1.2%) | 37/2884 ( 1.3%) |
|                                                                     | 2nd year         | 14/1166 ( 1.2%) | 18/1206 ( 1.5%) | 32/2372 ( 1.3%) |
|                                                                     | 3rd year         | 14/ 963 ( 1.5%) | 10/1012 ( 1.0%) | 24/1975 ( 1.2%) |
|                                                                     | Overall          | 45/1432 ( 3.1%) | 43/1452 ( 3.0%) | 88/2884 ( 3.1%) |
| Acoustic neuroma                                                    | 3rd year         | 0/ 963          | 1/1012 (<0.1%)  | 1/1975 (<0.1%)  |
|                                                                     | Overall          | 0/1432          | 1/1452 (<0.1%)  | 1/2884 (<0.1%)  |
| Acrochordon                                                         | 1st year         | 0/1432          | 1/1452 (<0.1%)  | 1/2884 (<0.1%)  |
|                                                                     | 2nd year         | 1/1166 (<0.1%)  | 1/1206 (<0.1%)  | 2/2372 (<0.1%)  |
|                                                                     | 3rd year         | 0/ 963          | 1/1012 (<0.1%)  | 1/1975 (<0.1%)  |
|                                                                     | Overall          | 1/1432 (<0.1%)  | 3/1452 ( 0.2%)  | 4/2884 ( 0.1%)  |
| Acute leukaemia                                                     | 3rd year         | 1/ 963 ( 0.1%)  | 0/1012          | 1/1975 (<0.1%)  |
|                                                                     | Overall          | 1/1432 (<0.1%)  | 0/1452          | 1/2884 (<0.1%)  |
| Adenoma benign                                                      | 2nd year         | 0/1166          | 1/1206 (<0.1%)  | 1/2372 (<0.1%)  |
|                                                                     | Overall          | 0/1432          | 1/1452 (<0.1%)  | 1/2884 (<0.1%)  |
| Astrocytoma, low grade                                              | 1st year         | 1/1432 (<0.1%)  | 0/1452          | 1/2884 (<0.1%)  |
|                                                                     | Overall          | 1/1432 (<0.1%)  | 0/1452          | 1/2884 (<0.1%)  |

**Table 14.3.1 / 9: Number of subjects with adverse events by primary system organ class, preferred term and year (FAS)**

| Primary system organ class<br>Preferred term<br>MedDRA version 14.0 | YEAR OF<br>ONSET | LCS12           | LCS16           | Total           |
|---------------------------------------------------------------------|------------------|-----------------|-----------------|-----------------|
| Benign breast neoplasm                                              | 1st year         | 1/1432 ( <0.1%) | 1/1452 ( <0.1%) | 2/2884 ( <0.1%) |
|                                                                     | 2nd year         | 1/1166 ( <0.1%) | 0/1206          | 1/2372 ( <0.1%) |
|                                                                     | Overall          | 2/1432 ( 0.1%)  | 1/1452 ( <0.1%) | 3/2884 ( 0.1%)  |
| Cervicitis human papilloma virus                                    | 1st year         | 0/1432          | 1/1452 ( <0.1%) | 1/2884 ( <0.1%) |
|                                                                     | 2nd year         | 0/1166          | 3/1206 ( 0.2%)  | 3/2372 ( 0.1%)  |
|                                                                     | 3rd year         | 1/ 963 ( 0.1%)  | 0/1012          | 1/1975 ( <0.1%) |
|                                                                     | Overall          | 1/1432 ( <0.1%) | 4/1452 ( 0.3%)  | 5/2884 ( 0.2%)  |
| Cervix carcinoma stage 0                                            | 3rd year         | 0/ 963          | 1/1012 ( <0.1%) | 1/1975 ( <0.1%) |
|                                                                     | Overall          | 0/1432          | 1/1452 ( <0.1%) | 1/2884 ( <0.1%) |
| Cervix neoplasm                                                     | 3rd year         | 1/ 963 ( 0.1%)  | 0/1012          | 1/1975 ( <0.1%) |
|                                                                     | Overall          | 1/1432 ( <0.1%) | 0/1452          | 1/2884 ( <0.1%) |
| Enchondroma                                                         | 2nd year         | 0/1166          | 1/1206 ( <0.1%) | 1/2372 ( <0.1%) |
|                                                                     | Overall          | 0/1432          | 1/1452 ( <0.1%) | 1/2884 ( <0.1%) |
| Fibroadenoma of breast                                              | 1st year         | 2/1432 ( 0.1%)  | 1/1452 ( <0.1%) | 3/2884 ( 0.1%)  |
|                                                                     | 2nd year         | 4/1166 ( 0.3%)  | 1/1206 ( <0.1%) | 5/2372 ( 0.2%)  |
|                                                                     | 3rd year         | 3/ 963 ( 0.3%)  | 0/1012          | 3/1975 ( 0.2%)  |
|                                                                     | Overall          | 7/1432 ( 0.5%)  | 2/1452 ( 0.1%)  | 9/2884 ( 0.3%)  |
| Glomus tumour                                                       | 1st year         | 1/1432 ( <0.1%) | 0/1452          | 1/2884 ( <0.1%) |
|                                                                     | 2nd year         | 1/1166 ( <0.1%) | 0/1206          | 1/2372 ( <0.1%) |
|                                                                     | Overall          | 1/1432 ( <0.1%) | 0/1452          | 1/2884 ( <0.1%) |
| Haemangioma                                                         | 1st year         | 1/1432 ( <0.1%) | 0/1452          | 1/2884 ( <0.1%) |
|                                                                     | Overall          | 1/1432 ( <0.1%) | 0/1452          | 1/2884 ( <0.1%) |
| Haemangioma of liver                                                | 2nd year         | 0/1166          | 1/1206 ( <0.1%) | 1/2372 ( <0.1%) |
|                                                                     | Overall          | 0/1432          | 1/1452 ( <0.1%) | 1/2884 ( <0.1%) |
| Leiomyoma                                                           | 2nd year         | 0/1166          | 1/1206 ( <0.1%) | 1/2372 ( <0.1%) |
|                                                                     | Overall          | 0/1432          | 1/1452 ( <0.1%) | 1/2884 ( <0.1%) |
| Lipoma of breast                                                    | 2nd year         | 2/1166 ( 0.2%)  | 0/1206          | 2/2372 ( <0.1%) |
|                                                                     | Overall          | 2/1432 ( 0.1%)  | 0/1452          | 2/2884 ( <0.1%) |

**Table 14.3.1 / 9: Number of subjects with adverse events by primary system organ class, preferred term and year (FAS)**

| Primary system organ class<br>Preferred term<br>MedDRA version 14.0 | YEAR OF<br>ONSET | LCS12           | LCS16           | Total           |
|---------------------------------------------------------------------|------------------|-----------------|-----------------|-----------------|
| Malignant melanoma                                                  | 2nd year         | 0/1166          | 1/1206 ( <0.1%) | 1/2372 ( <0.1%) |
|                                                                     | Overall          | 0/1432          | 1/1452 ( <0.1%) | 1/2884 ( <0.1%) |
| Melanocytic naevus                                                  | 1st year         | 4/1432 ( 0.3%)  | 2/1452 ( 0.1%)  | 6/2884 ( 0.2%)  |
|                                                                     | 2nd year         | 1/1166 ( <0.1%) | 1/1206 ( <0.1%) | 2/2372 ( <0.1%) |
|                                                                     | 3rd year         | 1/ 963 ( 0.1%)  | 1/1012 ( <0.1%) | 2/1975 ( 0.1%)  |
|                                                                     | Overall          | 6/1432 ( 0.4%)  | 4/1452 ( 0.3%)  | 10/2884 ( 0.3%) |
| Neurilemmoma                                                        | 1st year         | 0/1432          | 1/1452 ( <0.1%) | 1/2884 ( <0.1%) |
|                                                                     | Overall          | 0/1432          | 1/1452 ( <0.1%) | 1/2884 ( <0.1%) |
| Ovarian germ cell teratoma benign                                   | 1st year         | 3/1432 ( 0.2%)  | 3/1452 ( 0.2%)  | 6/2884 ( 0.2%)  |
|                                                                     | 3rd year         | 2/ 963 ( 0.2%)  | 0/1012          | 2/1975 ( 0.1%)  |
|                                                                     | Overall          | 5/1432 ( 0.3%)  | 3/1452 ( 0.2%)  | 8/2884 ( 0.3%)  |
| Ovarian neoplasm                                                    | 1st year         | 0/1432          | 2/1452 ( 0.1%)  | 2/2884 ( <0.1%) |
|                                                                     | Overall          | 0/1432          | 2/1452 ( 0.1%)  | 2/2884 ( <0.1%) |
| Pancreatic carcinoma                                                | 1st year         | 0/1432          | 1/1452 ( <0.1%) | 1/2884 ( <0.1%) |
|                                                                     | Overall          | 0/1432          | 1/1452 ( <0.1%) | 1/2884 ( <0.1%) |
| Skin papilloma                                                      | 1st year         | 1/1432 ( <0.1%) | 1/1452 ( <0.1%) | 2/2884 ( <0.1%) |
|                                                                     | 2nd year         | 0/1166          | 1/1206 ( <0.1%) | 1/2372 ( <0.1%) |
|                                                                     | Overall          | 1/1432 ( <0.1%) | 2/1452 ( 0.1%)  | 3/2884 ( 0.1%)  |
| Teratoma benign                                                     | 2nd year         | 0/1166          | 1/1206 ( <0.1%) | 1/2372 ( <0.1%) |
|                                                                     | Overall          | 0/1432          | 1/1452 ( <0.1%) | 1/2884 ( <0.1%) |
| Thyroid cancer                                                      | 2nd year         | 1/1166 ( <0.1%) | 0/1206          | 1/2372 ( <0.1%) |
|                                                                     | 3rd year         | 1/ 963 ( 0.1%)  | 0/1012          | 1/1975 ( <0.1%) |
|                                                                     | Overall          | 2/1432 ( 0.1%)  | 0/1452          | 2/2884 ( <0.1%) |
| Thyroid neoplasm                                                    | 2nd year         | 0/1166          | 1/1206 ( <0.1%) | 1/2372 ( <0.1%) |
|                                                                     | 3rd year         | 0/ 963          | 1/1012 ( <0.1%) | 1/1975 ( <0.1%) |
|                                                                     | Overall          | 0/1432          | 2/1452 ( 0.1%)  | 2/2884 ( <0.1%) |
| Uterine leiomyoma                                                   | 1st year         | 4/1432 ( 0.3%)  | 2/1452 ( 0.1%)  | 6/2884 ( 0.2%)  |
|                                                                     | 2nd year         | 3/1166 ( 0.3%)  | 2/1206 ( 0.2%)  | 5/2372 ( 0.2%)  |
|                                                                     | 3rd year         | 1/ 963 ( 0.1%)  | 4/1012 ( 0.4%)  | 5/1975 ( 0.3%)  |
|                                                                     | Overall          | 8/1432 ( 0.6%)  | 6/1452 ( 0.4%)  | 14/2884 ( 0.5%) |

**Table 14.3.1 / 9: Number of subjects with adverse events by primary system organ class, preferred term and year (FAS)**

| Primary system organ class<br>Preferred term<br>MedDRA version 14.0 | YEAR OF<br>ONSET | LCS12             | LCS16             | Total             |
|---------------------------------------------------------------------|------------------|-------------------|-------------------|-------------------|
| Vulvovaginal human papilloma virus infection                        | 1st year         | 2/1432 ( 0.1%)    | 2/1452 ( 0.1%)    | 4/2884 ( 0.1%)    |
|                                                                     | 2nd year         | 0/1166            | 3/1206 ( 0.2%)    | 3/2372 ( 0.1%)    |
|                                                                     | 3rd year         | 3/ 963 ( 0.3%)    | 1/1012 (<0.1%)    | 4/1975 ( 0.2%)    |
|                                                                     | Overall          | 5/1432 ( 0.3%)    | 6/1452 ( 0.4%)    | 11/2884 ( 0.4%)   |
|                                                                     |                  |                   |                   |                   |
| Nervous system disorders                                            | 1st year         | 154/1432 ( 10.8%) | 170/1452 ( 11.7%) | 324/2884 ( 11.2%) |
|                                                                     | 2nd year         | 44/1166 ( 3.8%)   | 48/1206 ( 4.0%)   | 92/2372 ( 3.9%)   |
|                                                                     | 3rd year         | 27/ 963 ( 2.8%)   | 39/1012 ( 3.9%)   | 66/1975 ( 3.3%)   |
|                                                                     | Overall          | 200/1432 ( 14.0%) | 221/1452 ( 15.2%) | 421/2884 ( 14.6%) |
|                                                                     |                  |                   |                   |                   |
| Amnesia                                                             | 1st year         | 1/1432 (<0.1%)    | 0/1452            | 1/2884 (<0.1%)    |
|                                                                     | 2nd year         | 0/1166            | 1/1206 (<0.1%)    | 1/2372 (<0.1%)    |
|                                                                     | Overall          | 1/1432 (<0.1%)    | 1/1452 (<0.1%)    | 2/2884 (<0.1%)    |
| Aphonia                                                             | 1st year         | 0/1432            | 1/1452 (<0.1%)    | 1/2884 (<0.1%)    |
|                                                                     | Overall          | 0/1432            | 1/1452 (<0.1%)    | 1/2884 (<0.1%)    |
| Burning sensation                                                   | 1st year         | 1/1432 (<0.1%)    | 0/1452            | 1/2884 (<0.1%)    |
|                                                                     | Overall          | 1/1432 (<0.1%)    | 0/1452            | 1/2884 (<0.1%)    |
| Carpal tunnel syndrome                                              | 1st year         | 0/1432            | 4/1452 ( 0.3%)    | 4/2884 ( 0.1%)    |
|                                                                     | 2nd year         | 0/1166            | 2/1206 ( 0.2%)    | 2/2372 (<0.1%)    |
|                                                                     | 3rd year         | 1/ 963 ( 0.1%)    | 0/1012            | 1/1975 (<0.1%)    |
|                                                                     | Overall          | 1/1432 (<0.1%)    | 6/1452 ( 0.4%)    | 7/2884 ( 0.2%)    |
| Cervicobrachial syndrome                                            | 1st year         | 0/1432            | 1/1452 (<0.1%)    | 1/2884 (<0.1%)    |
|                                                                     | Overall          | 0/1432            | 1/1452 (<0.1%)    | 1/2884 (<0.1%)    |
| Cervicogenic headache                                               | 2nd year         | 1/1166 (<0.1%)    | 0/1206            | 1/2372 (<0.1%)    |
|                                                                     | Overall          | 1/1432 (<0.1%)    | 0/1452            | 1/2884 (<0.1%)    |
| Cluster headache                                                    | 2nd year         | 0/1166            | 1/1206 (<0.1%)    | 1/2372 (<0.1%)    |
|                                                                     | Overall          | 0/1432            | 1/1452 (<0.1%)    | 1/2884 (<0.1%)    |
| Convulsion                                                          | 1st year         | 0/1432            | 2/1452 ( 0.1%)    | 2/2884 (<0.1%)    |
|                                                                     | 2nd year         | 1/1166 (<0.1%)    | 0/1206            | 1/2372 (<0.1%)    |
|                                                                     | Overall          | 1/1432 (<0.1%)    | 2/1452 ( 0.1%)    | 3/2884 ( 0.1%)    |



**Table 14.3.1 / 9: Number of subjects with adverse events by primary system organ class, preferred term and year (FAS)**

| Primary system organ class<br>Preferred term<br>MedDRA version 14.0 | YEAR OF<br>ONSET | LCS12            | LCS16            | Total            |
|---------------------------------------------------------------------|------------------|------------------|------------------|------------------|
| Disturbance in attention                                            | 2nd year         | 0/1166           | 1/1206 ( <0.1%)  | 1/2372 ( <0.1%)  |
|                                                                     | 3rd year         | 0/ 963           | 1/1012 ( <0.1%)  | 1/1975 ( <0.1%)  |
|                                                                     | Overall          | 0/1432           | 2/1452 ( 0.1%)   | 2/2884 ( <0.1%)  |
| Dizziness                                                           | 1st year         | 7/1432 ( 0.5%)   | 14/1452 ( 1.0%)  | 21/2884 ( 0.7%)  |
|                                                                     | 2nd year         | 2/1166 ( 0.2%)   | 3/1206 ( 0.2%)   | 5/2372 ( 0.2%)   |
|                                                                     | 3rd year         | 0/ 963           | 5/1012 ( 0.5%)   | 5/1975 ( 0.3%)   |
|                                                                     | Overall          | 9/1432 ( 0.6%)   | 22/1452 ( 1.5%)  | 31/2884 ( 1.1%)  |
| Dizziness postural                                                  | 1st year         | 1/1432 ( <0.1%)  | 0/1452           | 1/2884 ( <0.1%)  |
|                                                                     | Overall          | 1/1432 ( <0.1%)  | 0/1452           | 1/2884 ( <0.1%)  |
| Facial spasm                                                        | 3rd year         | 1/ 963 ( 0.1%)   | 0/1012           | 1/1975 ( <0.1%)  |
|                                                                     | Overall          | 1/1432 ( <0.1%)  | 0/1452           | 1/2884 ( <0.1%)  |
| Headache                                                            | 1st year         | 102/1432 ( 7.1%) | 108/1452 ( 7.4%) | 210/2884 ( 7.3%) |
|                                                                     | 2nd year         | 29/1166 ( 2.5%)  | 28/1206 ( 2.3%)  | 57/2372 ( 2.4%)  |
|                                                                     | 3rd year         | 15/ 963 ( 1.6%)  | 23/1012 ( 2.3%)  | 38/1975 ( 1.9%)  |
|                                                                     | Overall          | 133/1432 ( 9.3%) | 137/1452 ( 9.4%) | 270/2884 ( 9.4%) |
| Hypoaesthesia                                                       | 1st year         | 1/1432 ( <0.1%)  | 2/1452 ( 0.1%)   | 3/2884 ( 0.1%)   |
|                                                                     | 2nd year         | 1/1166 ( <0.1%)  | 1/1206 ( <0.1%)  | 2/2372 ( <0.1%)  |
|                                                                     | 3rd year         | 0/ 963           | 1/1012 ( <0.1%)  | 1/1975 ( <0.1%)  |
|                                                                     | Overall          | 2/1432 ( 0.1%)   | 4/1452 ( 0.3%)   | 6/2884 ( 0.2%)   |
| Loss of consciousness                                               | 1st year         | 0/1432           | 1/1452 ( <0.1%)  | 1/2884 ( <0.1%)  |
|                                                                     | Overall          | 0/1432           | 1/1452 ( <0.1%)  | 1/2884 ( <0.1%)  |
| Migraine                                                            | 1st year         | 22/1432 ( 1.5%)  | 25/1452 ( 1.7%)  | 47/2884 ( 1.6%)  |
|                                                                     | 2nd year         | 5/1166 ( 0.4%)   | 8/1206 ( 0.7%)   | 13/2372 ( 0.5%)  |
|                                                                     | 3rd year         | 8/ 963 ( 0.8%)   | 6/1012 ( 0.6%)   | 14/1975 ( 0.7%)  |
|                                                                     | Overall          | 34/1432 ( 2.4%)  | 38/1452 ( 2.6%)  | 72/2884 ( 2.5%)  |
| Migraine with aura                                                  | 1st year         | 3/1432 ( 0.2%)   | 1/1452 ( <0.1%)  | 4/2884 ( 0.1%)   |
|                                                                     | 2nd year         | 1/1166 ( <0.1%)  | 0/1206           | 1/2372 ( <0.1%)  |
|                                                                     | 3rd year         | 0/ 963           | 1/1012 ( <0.1%)  | 1/1975 ( <0.1%)  |
|                                                                     | Overall          | 4/1432 ( 0.3%)   | 2/1452 ( 0.1%)   | 6/2884 ( 0.2%)   |
| Migraine without aura                                               | 1st year         | 1/1432 ( <0.1%)  | 0/1452           | 1/2884 ( <0.1%)  |
|                                                                     | Overall          | 1/1432 ( <0.1%)  | 0/1452           | 1/2884 ( <0.1%)  |

**Table 14.3.1 / 9: Number of subjects with adverse events by primary system organ class, preferred term and year (FAS)**

| Primary system organ class<br>Preferred term<br>MedDRA version 14.0 | YEAR OF<br>ONSET | LCS             |                 | Total           |
|---------------------------------------------------------------------|------------------|-----------------|-----------------|-----------------|
|                                                                     |                  | LCS12           | LCS16           |                 |
| Morton's neuralgia                                                  | 2nd year         | 1/1166 ( <0.1%) | 0/1206          | 1/2372 ( <0.1%) |
|                                                                     | Overall          | 1/1432 ( <0.1%) | 0/1452          | 1/2884 ( <0.1%) |
| Multiple sclerosis                                                  | 3rd year         | 1/ 963 ( 0.1%)  | 0/1012          | 1/1975 ( <0.1%) |
|                                                                     | Overall          | 1/1432 ( <0.1%) | 0/1452          | 1/2884 ( <0.1%) |
| Muscle contractions involuntary                                     | 1st year         | 0/1432          | 1/1452 ( <0.1%) | 1/2884 ( <0.1%) |
|                                                                     | Overall          | 0/1432          | 1/1452 ( <0.1%) | 1/2884 ( <0.1%) |
| Nerve compression                                                   | 2nd year         | 1/1166 ( <0.1%) | 0/1206          | 1/2372 ( <0.1%) |
|                                                                     | 3rd year         | 1/ 963 ( 0.1%)  | 0/1012          | 1/1975 ( <0.1%) |
|                                                                     | Overall          | 2/1432 ( 0.1%)  | 0/1452          | 2/2884 ( <0.1%) |
| Nervous system disorder                                             | 1st year         | 0/1432          | 1/1452 ( <0.1%) | 1/2884 ( <0.1%) |
|                                                                     | Overall          | 0/1432          | 1/1452 ( <0.1%) | 1/2884 ( <0.1%) |
| Paraesthesia                                                        | 1st year         | 0/1432          | 4/1452 ( 0.3%)  | 4/2884 ( 0.1%)  |
|                                                                     | 3rd year         | 0/ 963          | 1/1012 ( <0.1%) | 1/1975 ( <0.1%) |
|                                                                     | Overall          | 0/1432          | 5/1452 ( 0.3%)  | 5/2884 ( 0.2%)  |
| Presyncope                                                          | 1st year         | 4/1432 ( 0.3%)  | 8/1452 ( 0.6%)  | 12/2884 ( 0.4%) |
|                                                                     | 3rd year         | 0/ 963          | 1/1012 ( <0.1%) | 1/1975 ( <0.1%) |
|                                                                     | Overall          | 4/1432 ( 0.3%)  | 9/1452 ( 0.6%)  | 13/2884 ( 0.5%) |
| Restless legs syndrome                                              | 1st year         | 1/1432 ( <0.1%) | 0/1452          | 1/2884 ( <0.1%) |
|                                                                     | Overall          | 1/1432 ( <0.1%) | 0/1452          | 1/2884 ( <0.1%) |
| Sciatica                                                            | 1st year         | 3/1432 ( 0.2%)  | 3/1452 ( 0.2%)  | 6/2884 ( 0.2%)  |
|                                                                     | 2nd year         | 1/1166 ( <0.1%) | 0/1206          | 1/2372 ( <0.1%) |
|                                                                     | Overall          | 4/1432 ( 0.3%)  | 3/1452 ( 0.2%)  | 7/2884 ( 0.2%)  |
| Sinus headache                                                      | 1st year         | 1/1432 ( <0.1%) | 0/1452          | 1/2884 ( <0.1%) |
|                                                                     | 2nd year         | 0/1166          | 1/1206 ( <0.1%) | 1/2372 ( <0.1%) |
|                                                                     | 3rd year         | 0/ 963          | 1/1012 ( <0.1%) | 1/1975 ( <0.1%) |
|                                                                     | Overall          | 1/1432 ( <0.1%) | 2/1452 ( 0.1%)  | 3/2884 ( 0.1%)  |
| Somnolence                                                          | 1st year         | 2/1432 ( 0.1%)  | 0/1452          | 2/2884 ( <0.1%) |
|                                                                     | 2nd year         | 0/1166          | 1/1206 ( <0.1%) | 1/2372 ( <0.1%) |
|                                                                     | Overall          | 2/1432 ( 0.1%)  | 1/1452 ( <0.1%) | 3/2884 ( 0.1%)  |

**Table 14.3.1 / 9: Number of subjects with adverse events by primary system organ class, preferred term and year (FAS)**

| Primary system organ class<br>Preferred term<br>MedDRA version 14.0 | YEAR OF<br>ONSET | LCS12           | LCS16           | Total           |
|---------------------------------------------------------------------|------------------|-----------------|-----------------|-----------------|
| Spinal cord herniation                                              | 2nd year         | 0/1166          | 1/1206 ( <0.1%) | 1/2372 ( <0.1%) |
|                                                                     | Overall          | 0/1432          | 1/1452 ( <0.1%) | 1/2884 ( <0.1%) |
| Status migrainosus                                                  | 1st year         | 1/1432 ( <0.1%) | 0/1452          | 1/2884 ( <0.1%) |
|                                                                     | Overall          | 1/1432 ( <0.1%) | 0/1452          | 1/2884 ( <0.1%) |
| Syncope                                                             | 1st year         | 6/1432 ( 0.4%)  | 4/1452 ( 0.3%)  | 10/2884 ( 0.3%) |
|                                                                     | 3rd year         | 0/ 963          | 1/1012 ( <0.1%) | 1/1975 ( <0.1%) |
|                                                                     | Overall          | 6/1432 ( 0.4%)  | 5/1452 ( 0.3%)  | 11/2884 ( 0.4%) |
| Tension headache                                                    | 1st year         | 6/1432 ( 0.4%)  | 4/1452 ( 0.3%)  | 10/2884 ( 0.3%) |
|                                                                     | 2nd year         | 3/1166 ( 0.3%)  | 3/1206 ( 0.2%)  | 6/2372 ( 0.3%)  |
|                                                                     | 3rd year         | 3/ 963 ( 0.3%)  | 3/1012 ( 0.3%)  | 6/1975 ( 0.3%)  |
|                                                                     | Overall          | 12/1432 ( 0.8%) | 9/1452 ( 0.6%)  | 21/2884 ( 0.7%) |
| Thoracic outlet syndrome                                            | 2nd year         | 1/1166 ( <0.1%) | 0/1206          | 1/2372 ( <0.1%) |
|                                                                     | Overall          | 1/1432 ( <0.1%) | 0/1452          | 1/2884 ( <0.1%) |
| VIIth nerve paralysis                                               | 1st year         | 2/1432 ( 0.1%)  | 0/1452          | 2/2884 ( <0.1%) |
|                                                                     | Overall          | 2/1432 ( 0.1%)  | 0/1452          | 2/2884 ( <0.1%) |
| Pregnancy, puerperium and perinatal conditions                      | 1st year         | 3/1432 ( 0.2%)  | 3/1452 ( 0.2%)  | 6/2884 ( 0.2%)  |
|                                                                     | 2nd year         | 2/1166 ( 0.2%)  | 3/1206 ( 0.2%)  | 5/2372 ( 0.2%)  |
|                                                                     | 3rd year         | 1/ 963 ( 0.1%)  | 4/1012 ( 0.4%)  | 5/1975 ( 0.3%)  |
|                                                                     | Overall          | 6/1432 ( 0.4%)  | 10/1452 ( 0.7%) | 16/2884 ( 0.6%) |
| Abortion spontaneous                                                | 1st year         | 1/1432 ( <0.1%) | 0/1452          | 1/2884 ( <0.1%) |
|                                                                     | 2nd year         | 1/1166 ( <0.1%) | 0/1206          | 1/2372 ( <0.1%) |
|                                                                     | 3rd year         | 1/ 963 ( 0.1%)  | 0/1012          | 1/1975 ( <0.1%) |
|                                                                     | Overall          | 3/1432 ( 0.2%)  | 0/1452          | 3/2884 ( 0.1%)  |
| Abortion spontaneous incomplete                                     | 2nd year         | 0/1166          | 1/1206 ( <0.1%) | 1/2372 ( <0.1%) |
|                                                                     | Overall          | 0/1432          | 1/1452 ( <0.1%) | 1/2884 ( <0.1%) |
| Blighted ovum                                                       | 3rd year         | 0/ 963          | 1/1012 ( <0.1%) | 1/1975 ( <0.1%) |
|                                                                     | Overall          | 0/1432          | 1/1452 ( <0.1%) | 1/2884 ( <0.1%) |

**Table 14.3.1 / 9: Number of subjects with adverse events by primary system organ class, preferred term and year (FAS)**

| Primary system organ class<br>Preferred term<br>MedDRA version 14.0 | YEAR OF<br>ONSET | LCS12             | LCS16             | Total             |
|---------------------------------------------------------------------|------------------|-------------------|-------------------|-------------------|
| Ectopic pregnancy                                                   | 1st year         | 2/1432 ( 0.1%)    | 2/1452 ( 0.1%)    | 4/2884 ( 0.1%)    |
|                                                                     | 2nd year         | 1/1166 ( <0.1%)   | 2/1206 ( 0.2%)    | 3/2372 ( 0.1%)    |
|                                                                     | 3rd year         | 0/ 963            | 2/1012 ( 0.2%)    | 2/1975 ( 0.1%)    |
|                                                                     | Overall          | 3/1432 ( 0.2%)    | 6/1452 ( 0.4%)    | 9/2884 ( 0.3%)    |
| Premature separation of placenta                                    | 2nd year         | 1/1166 ( <0.1%)   | 0/1206            | 1/2372 ( <0.1%)   |
|                                                                     | Overall          | 1/1432 ( <0.1%)   | 0/1452            | 1/2884 ( <0.1%)   |
| Ruptured ectopic pregnancy                                          | 3rd year         | 0/ 963            | 1/1012 ( <0.1%)   | 1/1975 ( <0.1%)   |
|                                                                     | Overall          | 0/1432            | 1/1452 ( <0.1%)   | 1/2884 ( <0.1%)   |
| Uterine contractions abnormal                                       | 1st year         | 0/1432            | 1/1452 ( <0.1%)   | 1/2884 ( <0.1%)   |
|                                                                     | Overall          | 0/1432            | 1/1452 ( <0.1%)   | 1/2884 ( <0.1%)   |
| Psychiatric disorders                                               | 1st year         | 107/1432 ( 7.5%)  | 98/1452 ( 6.7%)   | 205/2884 ( 7.1%)  |
|                                                                     | 2nd year         | 55/1166 ( 4.7%)   | 53/1206 ( 4.4%)   | 108/2372 ( 4.6%)  |
|                                                                     | 3rd year         | 26/ 963 ( 2.7%)   | 37/1012 ( 3.7%)   | 63/1975 ( 3.2%)   |
|                                                                     | Overall          | 173/1432 ( 12.1%) | 172/1452 ( 11.8%) | 345/2884 ( 12.0%) |
| Acute stress disorder                                               | 3rd year         | 0/ 963            | 1/1012 ( <0.1%)   | 1/1975 ( <0.1%)   |
|                                                                     | Overall          | 0/1432            | 1/1452 ( <0.1%)   | 1/2884 ( <0.1%)   |
| Adjustment disorder                                                 | 1st year         | 1/1432 ( <0.1%)   | 0/1452            | 1/2884 ( <0.1%)   |
|                                                                     | Overall          | 1/1432 ( <0.1%)   | 0/1452            | 1/2884 ( <0.1%)   |
| Affect lability                                                     | 1st year         | 2/1432 ( 0.1%)    | 1/1452 ( <0.1%)   | 3/2884 ( 0.1%)    |
|                                                                     | 2nd year         | 2/1166 ( 0.2%)    | 0/1206            | 2/2372 ( <0.1%)   |
|                                                                     | Overall          | 4/1432 ( 0.3%)    | 1/1452 ( <0.1%)   | 5/2884 ( 0.2%)    |
| Affective disorder                                                  | 2nd year         | 0/1166            | 1/1206 ( <0.1%)   | 1/2372 ( <0.1%)   |
|                                                                     | Overall          | 0/1432            | 1/1452 ( <0.1%)   | 1/2884 ( <0.1%)   |
| Aggression                                                          | 1st year         | 1/1432 ( <0.1%)   | 0/1452            | 1/2884 ( <0.1%)   |
|                                                                     | Overall          | 1/1432 ( <0.1%)   | 0/1452            | 1/2884 ( <0.1%)   |
| Alcohol abuse                                                       | 2nd year         | 0/1166            | 1/1206 ( <0.1%)   | 1/2372 ( <0.1%)   |
|                                                                     | Overall          | 0/1432            | 1/1452 ( <0.1%)   | 1/2884 ( <0.1%)   |

**Table 14.3.1 / 9: Number of subjects with adverse events by primary system organ class, preferred term and year (FAS)**

| Primary system organ class<br>Preferred term<br>MedDRA version 14.0 | YEAR OF<br>ONSET | LCS             |                 | Total           |
|---------------------------------------------------------------------|------------------|-----------------|-----------------|-----------------|
|                                                                     |                  | LCS12           | LCS16           |                 |
| Alcoholism                                                          | 2nd year         | 0/1166          | 1/1206 ( <0.1%) | 1/2372 ( <0.1%) |
|                                                                     | Overall          | 0/1432          | 1/1452 ( <0.1%) | 1/2884 ( <0.1%) |
| Anxiety                                                             | 1st year         | 17/1432 ( 1.2%) | 17/1452 ( 1.2%) | 34/2884 ( 1.2%) |
|                                                                     | 2nd year         | 13/1166 ( 1.1%) | 12/1206 ( 1.0%) | 25/2372 ( 1.1%) |
|                                                                     | 3rd year         | 9/ 963 ( 0.9%)  | 10/1012 ( 1.0%) | 19/1975 ( 1.0%) |
|                                                                     | Overall          | 37/1432 ( 2.6%) | 37/1452 ( 2.5%) | 74/2884 ( 2.6%) |
| Anxiety disorder                                                    | 1st year         | 0/1432          | 2/1452 ( 0.1%)  | 2/2884 ( <0.1%) |
|                                                                     | 2nd year         | 0/1166          | 1/1206 ( <0.1%) | 1/2372 ( <0.1%) |
|                                                                     | 3rd year         | 1/ 963 ( 0.1%)  | 1/1012 ( <0.1%) | 2/1975 ( 0.1%)  |
|                                                                     | Overall          | 1/1432 ( <0.1%) | 4/1452 ( 0.3%)  | 5/2884 ( 0.2%)  |
| Attention deficit/hyperactivity disorder                            | 1st year         | 1/1432 ( <0.1%) | 3/1452 ( 0.2%)  | 4/2884 ( 0.1%)  |
|                                                                     | 2nd year         | 1/1166 ( <0.1%) | 1/1206 ( <0.1%) | 2/2372 ( <0.1%) |
|                                                                     | 3rd year         | 2/ 963 ( 0.2%)  | 0/1012          | 2/1975 ( 0.1%)  |
|                                                                     | Overall          | 4/1432 ( 0.3%)  | 4/1452 ( 0.3%)  | 8/2884 ( 0.3%)  |
| Bipolar I disorder                                                  | 1st year         | 1/1432 ( <0.1%) | 0/1452          | 1/2884 ( <0.1%) |
|                                                                     | Overall          | 1/1432 ( <0.1%) | 0/1452          | 1/2884 ( <0.1%) |
| Bipolar disorder                                                    | 1st year         | 0/1432          | 1/1452 ( <0.1%) | 1/2884 ( <0.1%) |
|                                                                     | 2nd year         | 1/1166 ( <0.1%) | 2/1206 ( 0.2%)  | 3/2372 ( 0.1%)  |
|                                                                     | 3rd year         | 0/ 963          | 3/1012 ( 0.3%)  | 3/1975 ( 0.2%)  |
|                                                                     | Overall          | 1/1432 ( <0.1%) | 6/1452 ( 0.4%)  | 7/2884 ( 0.2%)  |
| Bulimia nervosa                                                     | 1st year         | 0/1432          | 1/1452 ( <0.1%) | 1/2884 ( <0.1%) |
|                                                                     | Overall          | 0/1432          | 1/1452 ( <0.1%) | 1/2884 ( <0.1%) |
| Burnout syndrome                                                    | 1st year         | 1/1432 ( <0.1%) | 1/1452 ( <0.1%) | 2/2884 ( <0.1%) |
|                                                                     | 2nd year         | 0/1166          | 1/1206 ( <0.1%) | 1/2372 ( <0.1%) |
|                                                                     | Overall          | 1/1432 ( <0.1%) | 2/1452 ( 0.1%)  | 3/2884 ( 0.1%)  |
| Completed suicide                                                   | 3rd year         | 0/ 963          | 1/1012 ( <0.1%) | 1/1975 ( <0.1%) |
|                                                                     | Overall          | 0/1432          | 1/1452 ( <0.1%) | 1/2884 ( <0.1%) |
| Daydreaming                                                         | 2nd year         | 1/1166 ( <0.1%) | 0/1206          | 1/2372 ( <0.1%) |
|                                                                     | Overall          | 1/1432 ( <0.1%) | 0/1452          | 1/2884 ( <0.1%) |

**Table 14.3.1 / 9: Number of subjects with adverse events by primary system organ class, preferred term and year (FAS)**

| Primary system organ class<br>Preferred term<br>MedDRA version 14.0 | YEAR OF<br>ONSET | LCS12           | LCS16           | Total            |
|---------------------------------------------------------------------|------------------|-----------------|-----------------|------------------|
| Depressed mood                                                      | 1st year         | 4/1432 ( 0.3%)  | 3/1452 ( 0.2%)  | 7/2884 ( 0.2%)   |
|                                                                     | 2nd year         | 1/1166 (<0.1%)  | 0/1206          | 1/2372 (<0.1%)   |
|                                                                     | Overall          | 5/1432 ( 0.3%)  | 3/1452 ( 0.2%)  | 8/2884 ( 0.3%)   |
| Depression                                                          | 1st year         | 27/1432 ( 1.9%) | 26/1452 ( 1.8%) | 53/2884 ( 1.8%)  |
|                                                                     | 2nd year         | 18/1166 ( 1.5%) | 14/1206 ( 1.2%) | 32/2372 ( 1.3%)  |
|                                                                     | 3rd year         | 8/ 963 ( 0.8%)  | 12/1012 ( 1.2%) | 20/1975 ( 1.0%)  |
|                                                                     | Overall          | 51/1432 ( 3.6%) | 49/1452 ( 3.4%) | 100/2884 ( 3.5%) |
| Depression suicidal                                                 | 2nd year         | 1/1166 (<0.1%)  | 0/1206          | 1/2372 (<0.1%)   |
|                                                                     | Overall          | 1/1432 (<0.1%)  | 0/1452          | 1/2884 (<0.1%)   |
| Depressive symptom                                                  | 1st year         | 1/1432 (<0.1%)  | 0/1452          | 1/2884 (<0.1%)   |
|                                                                     | Overall          | 1/1432 (<0.1%)  | 0/1452          | 1/2884 (<0.1%)   |
| Disorientation                                                      | 1st year         | 0/1432          | 1/1452 (<0.1%)  | 1/2884 (<0.1%)   |
|                                                                     | Overall          | 0/1432          | 1/1452 (<0.1%)  | 1/2884 (<0.1%)   |
| Drug dependence                                                     | 1st year         | 1/1432 (<0.1%)  | 0/1452          | 1/2884 (<0.1%)   |
|                                                                     | 2nd year         | 0/1166          | 1/1206 (<0.1%)  | 1/2372 (<0.1%)   |
|                                                                     | Overall          | 1/1432 (<0.1%)  | 1/1452 (<0.1%)  | 2/2884 (<0.1%)   |
| Fear                                                                | 1st year         | 0/1432          | 1/1452 (<0.1%)  | 1/2884 (<0.1%)   |
|                                                                     | 3rd year         | 1/ 963 ( 0.1%)  | 0/1012          | 1/1975 (<0.1%)   |
|                                                                     | Overall          | 1/1432 (<0.1%)  | 1/1452 (<0.1%)  | 2/2884 (<0.1%)   |
| Generalised anxiety disorder                                        | 1st year         | 3/1432 ( 0.2%)  | 0/1452          | 3/2884 ( 0.1%)   |
|                                                                     | Overall          | 3/1432 ( 0.2%)  | 0/1452          | 3/2884 ( 0.1%)   |
| Hallucination, auditory                                             | 1st year         | 1/1432 (<0.1%)  | 0/1452          | 1/2884 (<0.1%)   |
|                                                                     | Overall          | 1/1432 (<0.1%)  | 0/1452          | 1/2884 (<0.1%)   |
| Insomnia                                                            | 1st year         | 16/1432 ( 1.1%) | 17/1452 ( 1.2%) | 33/2884 ( 1.1%)  |
|                                                                     | 2nd year         | 4/1166 ( 0.3%)  | 10/1206 ( 0.8%) | 14/2372 ( 0.6%)  |
|                                                                     | 3rd year         | 3/ 963 ( 0.3%)  | 4/1012 ( 0.4%)  | 7/1975 ( 0.4%)   |
|                                                                     | Overall          | 22/1432 ( 1.5%) | 29/1452 ( 2.0%) | 51/2884 ( 1.8%)  |

**Table 14.3.1 / 9: Number of subjects with adverse events by primary system organ class, preferred term and year (FAS)**

| Primary system organ class<br>Preferred term<br>MedDRA version 14.0 | YEAR OF<br>ONSET | LCS12           | LCS16           | Total           |
|---------------------------------------------------------------------|------------------|-----------------|-----------------|-----------------|
| Libido decreased                                                    | 1st year         | 18/1432 ( 1.3%) | 16/1452 ( 1.1%) | 34/2884 ( 1.2%) |
|                                                                     | 2nd year         | 8/1166 ( 0.7%)  | 8/1206 ( 0.7%)  | 16/2372 ( 0.7%) |
|                                                                     | 3rd year         | 2/ 963 ( 0.2%)  | 1/1012 (<0.1%)  | 3/1975 ( 0.2%)  |
|                                                                     | Overall          | 27/1432 ( 1.9%) | 25/1452 ( 1.7%) | 52/2884 ( 1.8%) |
| Libido increased                                                    | 1st year         | 1/1432 (<0.1%)  | 1/1452 (<0.1%)  | 2/2884 (<0.1%)  |
|                                                                     | 2nd year         | 1/1166 (<0.1%)  | 1/1206 (<0.1%)  | 2/2372 (<0.1%)  |
|                                                                     | Overall          | 2/1432 ( 0.1%)  | 2/1452 ( 0.1%)  | 4/2884 ( 0.1%)  |
| Loss of libido                                                      | 1st year         | 3/1432 ( 0.2%)  | 1/1452 (<0.1%)  | 4/2884 ( 0.1%)  |
|                                                                     | 2nd year         | 0/1166          | 1/1206 (<0.1%)  | 1/2372 (<0.1%)  |
|                                                                     | Overall          | 4/1432 ( 0.3%)  | 2/1452 ( 0.1%)  | 6/2884 ( 0.2%)  |
| Mental status changes                                               | 1st year         | 0/1432          | 1/1452 (<0.1%)  | 1/2884 (<0.1%)  |
|                                                                     | Overall          | 0/1432          | 1/1452 (<0.1%)  | 1/2884 (<0.1%)  |
| Mood altered                                                        | 1st year         | 10/1432 ( 0.7%) | 8/1452 ( 0.6%)  | 18/2884 ( 0.6%) |
|                                                                     | 2nd year         | 5/1166 ( 0.4%)  | 2/1206 ( 0.2%)  | 7/2372 ( 0.3%)  |
|                                                                     | Overall          | 15/1432 ( 1.0%) | 10/1452 ( 0.7%) | 25/2884 ( 0.9%) |
| Mood swings                                                         | 1st year         | 9/1432 ( 0.6%)  | 8/1452 ( 0.6%)  | 17/2884 ( 0.6%) |
|                                                                     | 2nd year         | 3/1166 ( 0.3%)  | 0/1206          | 3/2372 ( 0.1%)  |
|                                                                     | 3rd year         | 0/ 963          | 1/1012 (<0.1%)  | 1/1975 (<0.1%)  |
|                                                                     | Overall          | 12/1432 ( 0.8%) | 9/1452 ( 0.6%)  | 21/2884 ( 0.7%) |
| Nervousness                                                         | 1st year         | 0/1432          | 1/1452 (<0.1%)  | 1/2884 (<0.1%)  |
|                                                                     | 2nd year         | 0/1166          | 1/1206 (<0.1%)  | 1/2372 (<0.1%)  |
|                                                                     | Overall          | 0/1432          | 2/1452 ( 0.1%)  | 2/2884 (<0.1%)  |
| Nicotine dependence                                                 | 3rd year         | 1/ 963 ( 0.1%)  | 0/1012          | 1/1975 (<0.1%)  |
|                                                                     | Overall          | 1/1432 (<0.1%)  | 0/1452          | 1/2884 (<0.1%)  |
| Obsessive-compulsive personality disorder                           | 1st year         | 0/1432          | 1/1452 (<0.1%)  | 1/2884 (<0.1%)  |
|                                                                     | Overall          | 0/1432          | 1/1452 (<0.1%)  | 1/2884 (<0.1%)  |
| Panic attack                                                        | 1st year         | 0/1432          | 1/1452 (<0.1%)  | 1/2884 (<0.1%)  |
|                                                                     | 2nd year         | 1/1166 (<0.1%)  | 0/1206          | 1/2372 (<0.1%)  |
|                                                                     | Overall          | 1/1432 (<0.1%)  | 1/1452 (<0.1%)  | 2/2884 (<0.1%)  |

**Table 14.3.1 / 9: Number of subjects with adverse events by primary system organ class, preferred term and year (FAS)**

| Primary system organ class<br>Preferred term<br>MedDRA version 14.0 | YEAR OF<br>ONSET | LCS12           | LCS16           | Total           |
|---------------------------------------------------------------------|------------------|-----------------|-----------------|-----------------|
| Panic disorder                                                      | 1st year         | 0/1432          | 1/1452 ( <0.1%) | 1/2884 ( <0.1%) |
|                                                                     | 2nd year         | 1/1166 ( <0.1%) | 1/1206 ( <0.1%) | 2/2372 ( <0.1%) |
|                                                                     | 3rd year         | 0/ 963          | 3/1012 ( 0.3%)  | 3/1975 ( 0.2%)  |
|                                                                     | Overall          | 1/1432 ( <0.1%) | 5/1452 ( 0.3%)  | 6/2884 ( 0.2%)  |
| Personality disorder                                                | 3rd year         | 1/ 963 ( 0.1%)  | 0/1012          | 1/1975 ( <0.1%) |
|                                                                     | Overall          | 1/1432 ( <0.1%) | 0/1452          | 1/2884 ( <0.1%) |
| Phobia of flying                                                    | 3rd year         | 0/ 963          | 1/1012 ( <0.1%) | 1/1975 ( <0.1%) |
|                                                                     | Overall          | 0/1432          | 1/1452 ( <0.1%) | 1/2884 ( <0.1%) |
| Polysubstance dependence                                            | 2nd year         | 0/1166          | 1/1206 ( <0.1%) | 1/2372 ( <0.1%) |
|                                                                     | Overall          | 0/1432          | 1/1452 ( <0.1%) | 1/2884 ( <0.1%) |
| Post-traumatic stress disorder                                      | 2nd year         | 1/1166 ( <0.1%) | 1/1206 ( <0.1%) | 2/2372 ( <0.1%) |
|                                                                     | Overall          | 1/1432 ( <0.1%) | 1/1452 ( <0.1%) | 2/2884 ( <0.1%) |
| Psychotic disorder                                                  | 2nd year         | 0/1166          | 1/1206 ( <0.1%) | 1/2372 ( <0.1%) |
|                                                                     | Overall          | 0/1432          | 1/1452 ( <0.1%) | 1/2884 ( <0.1%) |
| Sleep disorder                                                      | 1st year         | 3/1432 ( 0.2%)  | 1/1452 ( <0.1%) | 4/2884 ( 0.1%)  |
|                                                                     | 2nd year         | 2/1166 ( 0.2%)  | 1/1206 ( <0.1%) | 3/2372 ( 0.1%)  |
|                                                                     | 3rd year         | 1/ 963 ( 0.1%)  | 0/1012          | 1/1975 ( <0.1%) |
|                                                                     | Overall          | 5/1432 ( 0.3%)  | 2/1452 ( 0.1%)  | 7/2884 ( 0.2%)  |
| Social phobia                                                       | 1st year         | 0/1432          | 1/1452 ( <0.1%) | 1/2884 ( <0.1%) |
|                                                                     | Overall          | 0/1432          | 1/1452 ( <0.1%) | 1/2884 ( <0.1%) |
| Stress                                                              | 1st year         | 2/1432 ( 0.1%)  | 0/1452          | 2/2884 ( <0.1%) |
|                                                                     | 2nd year         | 0/1166          | 3/1206 ( 0.2%)  | 3/2372 ( 0.1%)  |
|                                                                     | 3rd year         | 1/ 963 ( 0.1%)  | 1/1012 ( <0.1%) | 2/1975 ( 0.1%)  |
|                                                                     | Overall          | 3/1432 ( 0.2%)  | 4/1452 ( 0.3%)  | 7/2884 ( 0.2%)  |
| Suicide attempt                                                     | 2nd year         | 1/1166 ( <0.1%) | 0/1206          | 1/2372 ( <0.1%) |
|                                                                     | Overall          | 1/1432 ( <0.1%) | 0/1452          | 1/2884 ( <0.1%) |
| Renal and urinary disorders                                         | 1st year         | 25/1432 ( 1.7%) | 16/1452 ( 1.1%) | 41/2884 ( 1.4%) |
|                                                                     | 2nd year         | 8/1166 ( 0.7%)  | 8/1206 ( 0.7%)  | 16/2372 ( 0.7%) |
|                                                                     | 3rd year         | 10/ 963 ( 1.0%) | 9/1012 ( 0.9%)  | 19/1975 ( 1.0%) |
|                                                                     | Overall          | 41/1432 ( 2.9%) | 31/1452 ( 2.1%) | 72/2884 ( 2.5%) |



**Table 14.3.1 / 9: Number of subjects with adverse events by primary system organ class, preferred term and year (FAS)**

| Primary system organ class<br>Preferred term<br>MedDRA version 14.0 | YEAR OF<br>ONSET | YEAR OF         |                 | Total           |
|---------------------------------------------------------------------|------------------|-----------------|-----------------|-----------------|
|                                                                     |                  | LCS12           | LCS16           |                 |
| Calculus bladder                                                    | 1st year         | 1/1432 ( <0.1%) | 0/1452          | 1/2884 ( <0.1%) |
|                                                                     | Overall          | 1/1432 ( <0.1%) | 0/1452          | 1/2884 ( <0.1%) |
| Calculus urinary                                                    | 1st year         | 0/1432          | 1/1452 ( <0.1%) | 1/2884 ( <0.1%) |
|                                                                     | Overall          | 0/1432          | 1/1452 ( <0.1%) | 1/2884 ( <0.1%) |
| Chromaturia                                                         | 1st year         | 0/1432          | 1/1452 ( <0.1%) | 1/2884 ( <0.1%) |
|                                                                     | Overall          | 0/1432          | 1/1452 ( <0.1%) | 1/2884 ( <0.1%) |
| Cystitis haemorrhagic                                               | 1st year         | 1/1432 ( <0.1%) | 0/1452          | 1/2884 ( <0.1%) |
|                                                                     | Overall          | 1/1432 ( <0.1%) | 0/1452          | 1/2884 ( <0.1%) |
| Dysuria                                                             | 1st year         | 9/1432 ( 0.6%)  | 5/1452 ( 0.3%)  | 14/2884 ( 0.5%) |
|                                                                     | 2nd year         | 3/1166 ( 0.3%)  | 2/1206 ( 0.2%)  | 5/2372 ( 0.2%)  |
|                                                                     | 3rd year         | 3/ 963 ( 0.3%)  | 0/1012          | 3/1975 ( 0.2%)  |
|                                                                     | Overall          | 14/1432 ( 1.0%) | 7/1452 ( 0.5%)  | 21/2884 ( 0.7%) |
| Haematuria                                                          | 1st year         | 1/1432 ( <0.1%) | 1/1452 ( <0.1%) | 2/2884 ( <0.1%) |
|                                                                     | 3rd year         | 1/ 963 ( 0.1%)  | 1/1012 ( <0.1%) | 2/1975 ( 0.1%)  |
|                                                                     | Overall          | 2/1432 ( 0.1%)  | 2/1452 ( 0.1%)  | 4/2884 ( 0.1%)  |
| Hypertonic bladder                                                  | 3rd year         | 0/ 963          | 2/1012 ( 0.2%)  | 2/1975 ( 0.1%)  |
|                                                                     | Overall          | 0/1432          | 2/1452 ( 0.1%)  | 2/2884 ( <0.1%) |
| Micturition urgency                                                 | 1st year         | 1/1432 ( <0.1%) | 0/1452          | 1/2884 ( <0.1%) |
|                                                                     | 2nd year         | 1/1166 ( <0.1%) | 2/1206 ( 0.2%)  | 3/2372 ( 0.1%)  |
|                                                                     | 3rd year         | 1/ 963 ( 0.1%)  | 1/1012 ( <0.1%) | 2/1975 ( 0.1%)  |
|                                                                     | Overall          | 2/1432 ( 0.1%)  | 3/1452 ( 0.2%)  | 5/2884 ( 0.2%)  |
| Nephrolithiasis                                                     | 1st year         | 4/1432 ( 0.3%)  | 0/1452          | 4/2884 ( 0.1%)  |
|                                                                     | 2nd year         | 1/1166 ( <0.1%) | 2/1206 ( 0.2%)  | 3/2372 ( 0.1%)  |
|                                                                     | 3rd year         | 3/ 963 ( 0.3%)  | 1/1012 ( <0.1%) | 4/1975 ( 0.2%)  |
|                                                                     | Overall          | 8/1432 ( 0.6%)  | 3/1452 ( 0.2%)  | 11/2884 ( 0.4%) |
| Pollakiuria                                                         | 1st year         | 3/1432 ( 0.2%)  | 7/1452 ( 0.5%)  | 10/2884 ( 0.3%) |
|                                                                     | 2nd year         | 0/1166          | 1/1206 ( <0.1%) | 1/2372 ( <0.1%) |
|                                                                     | 3rd year         | 1/ 963 ( 0.1%)  | 0/1012          | 1/1975 ( <0.1%) |
|                                                                     | Overall          | 4/1432 ( 0.3%)  | 8/1452 ( 0.6%)  | 12/2884 ( 0.4%) |

**Table 14.3.1 / 9: Number of subjects with adverse events by primary system organ class, preferred term and year (FAS)**

| Primary system organ class<br>Preferred term<br>MedDRA version 14.0 | YEAR OF<br>ONSET | LCS12          | LCS16          | Total          |
|---------------------------------------------------------------------|------------------|----------------|----------------|----------------|
| Polyuria                                                            | 1st year         | 0/1432         | 1/1452 (<0.1%) | 1/2884 (<0.1%) |
|                                                                     | 2nd year         | 1/1166 (<0.1%) | 0/1206         | 1/2372 (<0.1%) |
|                                                                     | Overall          | 1/1432 (<0.1%) | 1/1452 (<0.1%) | 2/2884 (<0.1%) |
| Renal cyst                                                          | 3rd year         | 0/ 963         | 1/1012 (<0.1%) | 1/1975 (<0.1%) |
|                                                                     | Overall          | 0/1432         | 1/1452 (<0.1%) | 1/2884 (<0.1%) |
| Renal pain                                                          | 1st year         | 1/1432 (<0.1%) | 0/1452         | 1/2884 (<0.1%) |
|                                                                     | Overall          | 1/1432 (<0.1%) | 0/1452         | 1/2884 (<0.1%) |
| Strangury                                                           | 1st year         | 1/1432 (<0.1%) | 0/1452         | 1/2884 (<0.1%) |
|                                                                     | Overall          | 1/1432 (<0.1%) | 0/1452         | 1/2884 (<0.1%) |
| Stress urinary incontinence                                         | 1st year         | 0/1432         | 2/1452 ( 0.1%) | 2/2884 (<0.1%) |
|                                                                     | 3rd year         | 1/ 963 ( 0.1%) | 0/1012         | 1/1975 (<0.1%) |
|                                                                     | Overall          | 1/1432 (<0.1%) | 2/1452 ( 0.1%) | 3/2884 ( 0.1%) |
| Ureteric obstruction                                                | 1st year         | 0/1432         | 1/1452 (<0.1%) | 1/2884 (<0.1%) |
|                                                                     | Overall          | 0/1432         | 1/1452 (<0.1%) | 1/2884 (<0.1%) |
| Urethral cyst                                                       | 3rd year         | 0/ 963         | 1/1012 (<0.1%) | 1/1975 (<0.1%) |
|                                                                     | Overall          | 0/1432         | 1/1452 (<0.1%) | 1/2884 (<0.1%) |
| Urinary incontinence                                                | 1st year         | 2/1432 ( 0.1%) | 0/1452         | 2/2884 (<0.1%) |
|                                                                     | 2nd year         | 1/1166 (<0.1%) | 1/1206 (<0.1%) | 2/2372 (<0.1%) |
|                                                                     | 3rd year         | 0/ 963         | 1/1012 (<0.1%) | 1/1975 (<0.1%) |
|                                                                     | Overall          | 3/1432 ( 0.2%) | 1/1452 (<0.1%) | 4/2884 ( 0.1%) |
| Urinary retention                                                   | 3rd year         | 0/ 963         | 1/1012 (<0.1%) | 1/1975 (<0.1%) |
|                                                                     | Overall          | 0/1432         | 1/1452 (<0.1%) | 1/2884 (<0.1%) |
| Urinary tract disorder                                              | 1st year         | 1/1432 (<0.1%) | 0/1452         | 1/2884 (<0.1%) |
|                                                                     | Overall          | 1/1432 (<0.1%) | 0/1452         | 1/2884 (<0.1%) |
| Urinary tract inflammation                                          | 1st year         | 1/1432 (<0.1%) | 0/1452         | 1/2884 (<0.1%) |
|                                                                     | Overall          | 1/1432 (<0.1%) | 0/1452         | 1/2884 (<0.1%) |

**Table 14.3.1 / 9: Number of subjects with adverse events by primary system organ class, preferred term and year (FAS)**

| Primary system organ class<br>Preferred term<br>MedDRA version 14.0 | YEAR OF<br>ONSET | LCS12             | LCS16             | Total              |
|---------------------------------------------------------------------|------------------|-------------------|-------------------|--------------------|
| Urinary tract pain                                                  | 1st year         | 1/1432 ( <0.1%)   | 1/1452 ( <0.1%)   | 2/2884 ( <0.1%)    |
|                                                                     | 2nd year         | 1/1166 ( <0.1%)   | 0/1206            | 1/2372 ( <0.1%)    |
|                                                                     | Overall          | 2/1432 ( 0.1%)    | 1/1452 ( <0.1%)   | 3/2884 ( 0.1%)     |
| Urine odour abnormal                                                | 1st year         | 0/1432            | 1/1452 ( <0.1%)   | 1/2884 ( <0.1%)    |
|                                                                     | Overall          | 0/1432            | 1/1452 ( <0.1%)   | 1/2884 ( <0.1%)    |
| Reproductive system and breast disorders                            | 1st year         | 478/1432 ( 33.4%) | 536/1452 ( 36.9%) | 1014/2884 ( 35.2%) |
|                                                                     | 2nd year         | 213/1166 ( 18.3%) | 257/1206 ( 21.3%) | 470/2372 ( 19.8%)  |
|                                                                     | 3rd year         | 161/ 963 ( 16.7%) | 195/1012 ( 19.3%) | 356/1975 ( 18.0%)  |
|                                                                     | Overall          | 681/1432 ( 47.6%) | 763/1452 ( 52.5%) | 1444/2884 ( 50.1%) |
| Adenomyosis                                                         | 3rd year         | 1/ 963 ( 0.1%)    | 0/1012            | 1/1975 ( <0.1%)    |
|                                                                     | Overall          | 1/1432 ( <0.1%)   | 0/1452            | 1/2884 ( <0.1%)    |
| Adnexa uteri mass                                                   | 3rd year         | 1/ 963 ( 0.1%)    | 0/1012            | 1/1975 ( <0.1%)    |
|                                                                     | Overall          | 1/1432 ( <0.1%)   | 0/1452            | 1/2884 ( <0.1%)    |
| Adnexa uteri pain                                                   | 1st year         | 2/1432 ( 0.1%)    | 3/1452 ( 0.2%)    | 5/2884 ( 0.2%)     |
|                                                                     | 2nd year         | 0/1166            | 2/1206 ( 0.2%)    | 2/2372 ( <0.1%)    |
|                                                                     | 3rd year         | 1/ 963 ( 0.1%)    | 0/1012            | 1/1975 ( <0.1%)    |
|                                                                     | Overall          | 3/1432 ( 0.2%)    | 5/1452 ( 0.3%)    | 8/2884 ( 0.3%)     |
| Amenorrhoea                                                         | 1st year         | 0/1432            | 2/1452 ( 0.1%)    | 2/2884 ( <0.1%)    |
|                                                                     | 2nd year         | 0/1166            | 4/1206 ( 0.3%)    | 4/2372 ( 0.2%)     |
|                                                                     | Overall          | 0/1432            | 6/1452 ( 0.4%)    | 6/2884 ( 0.2%)     |
| Atrophic vulvovaginitis                                             | 2nd year         | 1/1166 ( <0.1%)   | 0/1206            | 1/2372 ( <0.1%)    |
|                                                                     | Overall          | 1/1432 ( <0.1%)   | 0/1452            | 1/2884 ( <0.1%)    |
| Bartholin's cyst                                                    | 3rd year         | 0/ 963            | 1/1012 ( <0.1%)   | 1/1975 ( <0.1%)    |
|                                                                     | Overall          | 0/1432            | 1/1452 ( <0.1%)   | 1/2884 ( <0.1%)    |
| Breast calcifications                                               | 1st year         | 1/1432 ( <0.1%)   | 0/1452            | 1/2884 ( <0.1%)    |
|                                                                     | Overall          | 1/1432 ( <0.1%)   | 0/1452            | 1/2884 ( <0.1%)    |
| Breast cyst                                                         | 1st year         | 2/1432 ( 0.1%)    | 0/1452            | 2/2884 ( <0.1%)    |
|                                                                     | 2nd year         | 1/1166 ( <0.1%)   | 2/1206 ( 0.2%)    | 3/2372 ( 0.1%)     |
|                                                                     | Overall          | 3/1432 ( 0.2%)    | 2/1452 ( 0.1%)    | 5/2884 ( 0.2%)     |

**Table 14.3.1 / 9: Number of subjects with adverse events by primary system organ class, preferred term and year (FAS)**

| Primary system organ class<br>Preferred term<br>MedDRA version 14.0 | YEAR OF<br>ONSET | LCS12           | LCS16           | Total           |
|---------------------------------------------------------------------|------------------|-----------------|-----------------|-----------------|
| Breast discharge                                                    | 1st year         | 0/1432          | 5/1452 ( 0.3%)  | 5/2884 ( 0.2%)  |
|                                                                     | 2nd year         | 0/1166          | 2/1206 ( 0.2%)  | 2/2372 ( <0.1%) |
|                                                                     | 3rd year         | 0/ 963          | 3/1012 ( 0.3%)  | 3/1975 ( 0.2%)  |
|                                                                     | Overall          | 0/1432          | 10/1452 ( 0.7%) | 10/2884 ( 0.3%) |
| Breast discomfort                                                   | 1st year         | 4/1432 ( 0.3%)  | 6/1452 ( 0.4%)  | 10/2884 ( 0.3%) |
|                                                                     | 2nd year         | 0/1166          | 1/1206 ( <0.1%) | 1/2372 ( <0.1%) |
|                                                                     | 3rd year         | 0/ 963          | 1/1012 ( <0.1%) | 1/1975 ( <0.1%) |
|                                                                     | Overall          | 4/1432 ( 0.3%)  | 8/1452 ( 0.6%)  | 12/2884 ( 0.4%) |
| Breast disorder female                                              | 2nd year         | 0/1166          | 1/1206 ( <0.1%) | 1/2372 ( <0.1%) |
|                                                                     | Overall          | 0/1432          | 1/1452 ( <0.1%) | 1/2884 ( <0.1%) |
| Breast dysplasia                                                    | 3rd year         | 1/ 963 ( 0.1%)  | 0/1012          | 1/1975 ( <0.1%) |
|                                                                     | Overall          | 1/1432 ( <0.1%) | 0/1452          | 1/2884 ( <0.1%) |
| Breast engorgement                                                  | 2nd year         | 1/1166 ( <0.1%) | 0/1206          | 1/2372 ( <0.1%) |
|                                                                     | Overall          | 1/1432 ( <0.1%) | 0/1452          | 1/2884 ( <0.1%) |
| Breast enlargement                                                  | 1st year         | 0/1432          | 2/1452 ( 0.1%)  | 2/2884 ( <0.1%) |
|                                                                     | 2nd year         | 0/1166          | 2/1206 ( 0.2%)  | 2/2372 ( <0.1%) |
|                                                                     | Overall          | 0/1432          | 4/1452 ( 0.3%)  | 4/2884 ( 0.1%)  |
| Breast mass                                                         | 1st year         | 3/1432 ( 0.2%)  | 2/1452 ( 0.1%)  | 5/2884 ( 0.2%)  |
|                                                                     | 2nd year         | 1/1166 ( <0.1%) | 3/1206 ( 0.2%)  | 4/2372 ( 0.2%)  |
|                                                                     | 3rd year         | 3/ 963 ( 0.3%)  | 2/1012 ( 0.2%)  | 5/1975 ( 0.3%)  |
|                                                                     | Overall          | 7/1432 ( 0.5%)  | 7/1452 ( 0.5%)  | 14/2884 ( 0.5%) |
| Breast pain                                                         | 1st year         | 23/1432 ( 1.6%) | 23/1452 ( 1.6%) | 46/2884 ( 1.6%) |
|                                                                     | 2nd year         | 9/1166 ( 0.8%)  | 11/1206 ( 0.9%) | 20/2372 ( 0.8%) |
|                                                                     | 3rd year         | 6/ 963 ( 0.6%)  | 12/1012 ( 1.2%) | 18/1975 ( 0.9%) |
|                                                                     | Overall          | 36/1432 ( 2.5%) | 43/1452 ( 3.0%) | 79/2884 ( 2.7%) |
| Breast swelling                                                     | 1st year         | 1/1432 ( <0.1%) | 2/1452 ( 0.1%)  | 3/2884 ( 0.1%)  |
|                                                                     | Overall          | 1/1432 ( <0.1%) | 2/1452 ( 0.1%)  | 3/2884 ( 0.1%)  |
| Breast tenderness                                                   | 1st year         | 20/1432 ( 1.4%) | 22/1452 ( 1.5%) | 42/2884 ( 1.5%) |
|                                                                     | 2nd year         | 11/1166 ( 0.9%) | 11/1206 ( 0.9%) | 22/2372 ( 0.9%) |
|                                                                     | 3rd year         | 2/ 963 ( 0.2%)  | 4/1012 ( 0.4%)  | 6/1975 ( 0.3%)  |
|                                                                     | Overall          | 32/1432 ( 2.2%) | 35/1452 ( 2.4%) | 67/2884 ( 2.3%) |

**Table 14.3.1 / 9: Number of subjects with adverse events by primary system organ class, preferred term and year (FAS)**

| Primary system organ class<br>Preferred term<br>MedDRA version 14.0 | YEAR OF<br>ONSET | LCS12            |  | LCS16            |  | Total            |
|---------------------------------------------------------------------|------------------|------------------|--|------------------|--|------------------|
|                                                                     |                  |                  |  |                  |  |                  |
| Cervical cyst                                                       | 1st year         | 0/1432           |  | 1/1452 ( <0.1%)  |  | 1/2884 ( <0.1%)  |
|                                                                     | Overall          | 0/1432           |  | 1/1452 ( <0.1%)  |  | 1/2884 ( <0.1%)  |
| Cervical discharge                                                  | 1st year         | 1/1432 ( <0.1%)  |  | 0/1452           |  | 1/2884 ( <0.1%)  |
|                                                                     | 2nd year         | 1/1166 ( <0.1%)  |  | 0/1206           |  | 1/2372 ( <0.1%)  |
|                                                                     | Overall          | 2/1432 ( 0.1%)   |  | 0/1452           |  | 2/2884 ( <0.1%)  |
| Cervical dysplasia                                                  | 1st year         | 17/1432 ( 1.2%)  |  | 24/1452 ( 1.7%)  |  | 41/2884 ( 1.4%)  |
|                                                                     | 2nd year         | 46/1166 ( 3.9%)  |  | 53/1206 ( 4.4%)  |  | 99/2372 ( 4.2%)  |
|                                                                     | 3rd year         | 50/ 963 ( 5.2%)  |  | 48/1012 ( 4.7%)  |  | 98/1975 ( 5.0%)  |
|                                                                     | Overall          | 107/1432 ( 7.5%) |  | 115/1452 ( 7.9%) |  | 222/2884 ( 7.7%) |
| Cervical friability                                                 | 2nd year         | 0/1166           |  | 1/1206 ( <0.1%)  |  | 1/2372 ( <0.1%)  |
|                                                                     | Overall          | 0/1432           |  | 1/1452 ( <0.1%)  |  | 1/2884 ( <0.1%)  |
| Cervical polyp                                                      | 1st year         | 1/1432 ( <0.1%)  |  | 0/1452           |  | 1/2884 ( <0.1%)  |
|                                                                     | 3rd year         | 0/ 963           |  | 2/1012 ( 0.2%)   |  | 2/1975 ( 0.1%)   |
|                                                                     | Overall          | 1/1432 ( <0.1%)  |  | 2/1452 ( 0.1%)   |  | 3/2884 ( 0.1%)   |
| Cervix disorder                                                     | 1st year         | 0/1432           |  | 1/1452 ( <0.1%)  |  | 1/2884 ( <0.1%)  |
|                                                                     | Overall          | 0/1432           |  | 1/1452 ( <0.1%)  |  | 1/2884 ( <0.1%)  |
| Cervix erythema                                                     | 1st year         | 0/1432           |  | 1/1452 ( <0.1%)  |  | 1/2884 ( <0.1%)  |
|                                                                     | 3rd year         | 0/ 963           |  | 1/1012 ( <0.1%)  |  | 1/1975 ( <0.1%)  |
|                                                                     | Overall          | 0/1432           |  | 2/1452 ( 0.1%)   |  | 2/2884 ( <0.1%)  |
| Cervix haemorrhage uterine                                          | 1st year         | 0/1432           |  | 1/1452 ( <0.1%)  |  | 1/2884 ( <0.1%)  |
|                                                                     | Overall          | 0/1432           |  | 1/1452 ( <0.1%)  |  | 1/2884 ( <0.1%)  |
| Cervix inflammation                                                 | 2nd year         | 1/1166 ( <0.1%)  |  | 0/1206           |  | 1/2372 ( <0.1%)  |
|                                                                     | Overall          | 1/1432 ( <0.1%)  |  | 0/1452           |  | 1/2884 ( <0.1%)  |
| Cervix oedema                                                       | 2nd year         | 0/1166           |  | 1/1206 ( <0.1%)  |  | 1/2372 ( <0.1%)  |
|                                                                     | Overall          | 0/1432           |  | 1/1452 ( <0.1%)  |  | 1/2884 ( <0.1%)  |
| Coital bleeding                                                     | 1st year         | 8/1432 ( 0.6%)   |  | 7/1452 ( 0.5%)   |  | 15/2884 ( 0.5%)  |
|                                                                     | 2nd year         | 3/1166 ( 0.3%)   |  | 4/1206 ( 0.3%)   |  | 7/2372 ( 0.3%)   |
|                                                                     | 3rd year         | 3/ 963 ( 0.3%)   |  | 3/1012 ( 0.3%)   |  | 6/1975 ( 0.3%)   |
|                                                                     | Overall          | 14/1432 ( 1.0%)  |  | 14/1452 ( 1.0%)  |  | 28/2884 ( 1.0%)  |

**Table 14.3.1 / 9: Number of subjects with adverse events by primary system organ class, preferred term and year (FAS)**

| Primary system organ class<br>Preferred term<br>MedDRA version 14.0 | YEAR OF<br>ONSET | LCS12            | LCS16            | Total            |
|---------------------------------------------------------------------|------------------|------------------|------------------|------------------|
| Dysfunctional uterine bleeding                                      | 1st year         | 3/1432 ( 0.2%)   | 3/1452 ( 0.2%)   | 6/2884 ( 0.2%)   |
|                                                                     | 2nd year         | 0/1166           | 1/1206 ( <0.1%)  | 1/2372 ( <0.1%)  |
|                                                                     | Overall          | 3/1432 ( 0.2%)   | 4/1452 ( 0.3%)   | 7/2884 ( 0.2%)   |
| Dysmenorrhoea                                                       | 1st year         | 104/1432 ( 7.3%) | 75/1452 ( 5.2%)  | 179/2884 ( 6.2%) |
|                                                                     | 2nd year         | 20/1166 ( 1.7%)  | 26/1206 ( 2.2%)  | 46/2372 ( 1.9%)  |
|                                                                     | 3rd year         | 13/ 963 ( 1.3%)  | 14/1012 ( 1.4%)  | 27/1975 ( 1.4%)  |
|                                                                     | Overall          | 130/1432 ( 9.1%) | 108/1452 ( 7.4%) | 238/2884 ( 8.3%) |
| Dyspareunia                                                         | 1st year         | 24/1432 ( 1.7%)  | 18/1452 ( 1.2%)  | 42/2884 ( 1.5%)  |
|                                                                     | 2nd year         | 7/1166 ( 0.6%)   | 6/1206 ( 0.5%)   | 13/2372 ( 0.5%)  |
|                                                                     | 3rd year         | 3/ 963 ( 0.3%)   | 4/1012 ( 0.4%)   | 7/1975 ( 0.4%)   |
|                                                                     | Overall          | 33/1432 ( 2.3%)  | 28/1452 ( 1.9%)  | 61/2884 ( 2.1%)  |
| Ectropion of cervix                                                 | 1st year         | 2/1432 ( 0.1%)   | 1/1452 ( <0.1%)  | 3/2884 ( 0.1%)   |
|                                                                     | Overall          | 2/1432 ( 0.1%)   | 1/1452 ( <0.1%)  | 3/2884 ( 0.1%)   |
| Endometriosis                                                       | 1st year         | 4/1432 ( 0.3%)   | 1/1452 ( <0.1%)  | 5/2884 ( 0.2%)   |
|                                                                     | 2nd year         | 3/1166 ( 0.3%)   | 1/1206 ( <0.1%)  | 4/2372 ( 0.2%)   |
|                                                                     | 3rd year         | 1/ 963 ( 0.1%)   | 1/1012 ( <0.1%)  | 2/1975 ( 0.1%)   |
|                                                                     | Overall          | 8/1432 ( 0.6%)   | 3/1452 ( 0.2%)   | 11/2884 ( 0.4%)  |
| Fibrocystic breast disease                                          | 1st year         | 1/1432 ( <0.1%)  | 1/1452 ( <0.1%)  | 2/2884 ( <0.1%)  |
|                                                                     | 2nd year         | 2/1166 ( 0.2%)   | 3/1206 ( 0.2%)   | 5/2372 ( 0.2%)   |
|                                                                     | 3rd year         | 1/ 963 ( 0.1%)   | 1/1012 ( <0.1%)  | 2/1975 ( 0.1%)   |
|                                                                     | Overall          | 3/1432 ( 0.2%)   | 5/1452 ( 0.3%)   | 8/2884 ( 0.3%)   |
| Galactorrhoea                                                       | 1st year         | 3/1432 ( 0.2%)   | 5/1452 ( 0.3%)   | 8/2884 ( 0.3%)   |
|                                                                     | 2nd year         | 1/1166 ( <0.1%)  | 1/1206 ( <0.1%)  | 2/2372 ( <0.1%)  |
|                                                                     | 3rd year         | 0/ 963           | 2/1012 ( 0.2%)   | 2/1975 ( 0.1%)   |
|                                                                     | Overall          | 4/1432 ( 0.3%)   | 8/1452 ( 0.6%)   | 12/2884 ( 0.4%)  |
| Genital cyst                                                        | 1st year         | 0/1432           | 1/1452 ( <0.1%)  | 1/2884 ( <0.1%)  |
|                                                                     | Overall          | 0/1432           | 1/1452 ( <0.1%)  | 1/2884 ( <0.1%)  |
| Genital discharge                                                   | 1st year         | 4/1432 ( 0.3%)   | 4/1452 ( 0.3%)   | 8/2884 ( 0.3%)   |
|                                                                     | 2nd year         | 5/1166 ( 0.4%)   | 5/1206 ( 0.4%)   | 10/2372 ( 0.4%)  |
|                                                                     | 3rd year         | 1/ 963 ( 0.1%)   | 0/1012           | 1/1975 ( <0.1%)  |
|                                                                     | Overall          | 9/1432 ( 0.6%)   | 9/1452 ( 0.6%)   | 18/2884 ( 0.6%)  |

**Table 14.3.1 / 9: Number of subjects with adverse events by primary system organ class, preferred term and year (FAS)**

| Primary system organ class<br>Preferred term<br>MedDRA version 14.0 | YEAR OF<br>ONSET | LCS12           |  | LCS16           |  | Total           |
|---------------------------------------------------------------------|------------------|-----------------|--|-----------------|--|-----------------|
|                                                                     |                  |                 |  |                 |  |                 |
| Genital haemorrhage                                                 | 1st year         | 1/1432 ( <0.1%) |  | 0/1452          |  | 1/2884 ( <0.1%) |
|                                                                     | Overall          | 1/1432 ( <0.1%) |  | 0/1452          |  | 1/2884 ( <0.1%) |
| Genital lesion                                                      | 1st year         | 2/1432 ( 0.1%)  |  | 0/1452          |  | 2/2884 ( <0.1%) |
|                                                                     | Overall          | 2/1432 ( 0.1%)  |  | 0/1452          |  | 2/2884 ( <0.1%) |
| Genital rash                                                        | 2nd year         | 0/1166          |  | 1/1206 ( <0.1%) |  | 1/2372 ( <0.1%) |
|                                                                     | Overall          | 0/1432          |  | 1/1452 ( <0.1%) |  | 1/2884 ( <0.1%) |
| Haemorrhagic ovarian cyst                                           | 1st year         | 11/1432 ( 0.8%) |  | 11/1452 ( 0.8%) |  | 22/2884 ( 0.8%) |
|                                                                     | 2nd year         | 2/1166 ( 0.2%)  |  | 4/1206 ( 0.3%)  |  | 6/2372 ( 0.3%)  |
|                                                                     | 3rd year         | 2/ 963 ( 0.2%)  |  | 4/1012 ( 0.4%)  |  | 6/1975 ( 0.3%)  |
|                                                                     | Overall          | 13/1432 ( 0.9%) |  | 19/1452 ( 1.3%) |  | 32/2884 ( 1.1%) |
| Hydrometra                                                          | 1st year         | 1/1432 ( <0.1%) |  | 0/1452          |  | 1/2884 ( <0.1%) |
|                                                                     | 2nd year         | 1/1166 ( <0.1%) |  | 0/1206          |  | 1/2372 ( <0.1%) |
|                                                                     | Overall          | 2/1432 ( 0.1%)  |  | 0/1452          |  | 2/2884 ( <0.1%) |
| Hypomenorrhoea                                                      | 2nd year         | 1/1166 ( <0.1%) |  | 0/1206          |  | 1/2372 ( <0.1%) |
|                                                                     | 3rd year         | 1/ 963 ( 0.1%)  |  | 1/1012 ( <0.1%) |  | 2/1975 ( 0.1%)  |
|                                                                     | Overall          | 2/1432 ( 0.1%)  |  | 1/1452 ( <0.1%) |  | 3/2884 ( 0.1%)  |
| Menometrorrhagia                                                    | 1st year         | 1/1432 ( <0.1%) |  | 0/1452          |  | 1/2884 ( <0.1%) |
|                                                                     | 2nd year         | 1/1166 ( <0.1%) |  | 0/1206          |  | 1/2372 ( <0.1%) |
|                                                                     | Overall          | 2/1432 ( 0.1%)  |  | 0/1452          |  | 2/2884 ( <0.1%) |
| Menorrhagia                                                         | 1st year         | 5/1432 ( 0.3%)  |  | 9/1452 ( 0.6%)  |  | 14/2884 ( 0.5%) |
|                                                                     | 3rd year         | 1/ 963 ( 0.1%)  |  | 1/1012 ( <0.1%) |  | 2/1975 ( 0.1%)  |
|                                                                     | Overall          | 6/1432 ( 0.4%)  |  | 10/1452 ( 0.7%) |  | 16/2884 ( 0.6%) |
| Menstrual disorder                                                  | 1st year         | 2/1432 ( 0.1%)  |  | 0/1452          |  | 2/2884 ( <0.1%) |
|                                                                     | 2nd year         | 1/1166 ( <0.1%) |  | 0/1206          |  | 1/2372 ( <0.1%) |
|                                                                     | 3rd year         | 0/ 963          |  | 1/1012 ( <0.1%) |  | 1/1975 ( <0.1%) |
|                                                                     | Overall          | 3/1432 ( 0.2%)  |  | 1/1452 ( <0.1%) |  | 4/2884 ( 0.1%)  |
| Menstruation irregular                                              | 1st year         | 1/1432 ( <0.1%) |  | 3/1452 ( 0.2%)  |  | 4/2884 ( 0.1%)  |
|                                                                     | 2nd year         | 1/1166 ( <0.1%) |  | 0/1206          |  | 1/2372 ( <0.1%) |
|                                                                     | 3rd year         | 2/ 963 ( 0.2%)  |  | 0/1012          |  | 2/1975 ( 0.1%)  |
|                                                                     | Overall          | 4/1432 ( 0.3%)  |  | 3/1452 ( 0.2%)  |  | 7/2884 ( 0.2%)  |

**Table 14.3.1 / 9: Number of subjects with adverse events by primary system organ class, preferred term and year (FAS)**

| Primary system organ class<br>Preferred term<br>MedDRA version 14.0 | YEAR OF<br>ONSET | LCS12             | LCS16             | Total             |
|---------------------------------------------------------------------|------------------|-------------------|-------------------|-------------------|
| Metrorrhagia                                                        | 1st year         | 11/1432 ( 0.8%)   | 10/1452 ( 0.7%)   | 21/2884 ( 0.7%)   |
|                                                                     | 2nd year         | 1/1166 (<0.1%)    | 1/1206 (<0.1%)    | 2/2372 (<0.1%)    |
|                                                                     | 3rd year         | 4/ 963 ( 0.4%)    | 1/1012 (<0.1%)    | 5/1975 ( 0.3%)    |
|                                                                     | Overall          | 16/1432 ( 1.1%)   | 12/1452 ( 0.8%)   | 28/2884 ( 1.0%)   |
| Nipple exudate bloody                                               | 3rd year         | 0/ 963            | 1/1012 (<0.1%)    | 1/1975 (<0.1%)    |
|                                                                     | Overall          | 0/1432            | 1/1452 (<0.1%)    | 1/2884 (<0.1%)    |
| Nipple pain                                                         | 1st year         | 2/1432 ( 0.1%)    | 1/1452 (<0.1%)    | 3/2884 ( 0.1%)    |
|                                                                     | 2nd year         | 0/1166            | 1/1206 (<0.1%)    | 1/2372 (<0.1%)    |
|                                                                     | 3rd year         | 1/ 963 ( 0.1%)    | 0/1012            | 1/1975 (<0.1%)    |
|                                                                     | Overall          | 3/1432 ( 0.2%)    | 2/1452 ( 0.1%)    | 5/2884 ( 0.2%)    |
| Oligomenorrhoea                                                     | 1st year         | 0/1432            | 2/1452 ( 0.1%)    | 2/2884 (<0.1%)    |
|                                                                     | Overall          | 0/1432            | 2/1452 ( 0.1%)    | 2/2884 (<0.1%)    |
| Ovarian cyst                                                        | 1st year         | 115/1432 ( 8.0%)  | 204/1452 ( 14.0%) | 319/2884 ( 11.1%) |
|                                                                     | 2nd year         | 57/1166 ( 4.9%)   | 76/1206 ( 6.3%)   | 133/2372 ( 5.6%)  |
|                                                                     | 3rd year         | 40/ 963 ( 4.2%)   | 71/1012 ( 7.0%)   | 111/1975 ( 5.6%)  |
|                                                                     | Overall          | 186/1432 ( 13.0%) | 304/1452 ( 20.9%) | 490/2884 ( 17.0%) |
| Ovarian cyst ruptured                                               | 1st year         | 2/1432 ( 0.1%)    | 6/1452 ( 0.4%)    | 8/2884 ( 0.3%)    |
|                                                                     | 2nd year         | 0/1166            | 1/1206 (<0.1%)    | 1/2372 (<0.1%)    |
|                                                                     | Overall          | 2/1432 ( 0.1%)    | 7/1452 ( 0.5%)    | 9/2884 ( 0.3%)    |
| Ovarian cyst torsion                                                | 1st year         | 0/1432            | 1/1452 (<0.1%)    | 1/2884 (<0.1%)    |
|                                                                     | Overall          | 0/1432            | 1/1452 (<0.1%)    | 1/2884 (<0.1%)    |
| Ovarian disorder                                                    | 3rd year         | 0/ 963            | 1/1012 (<0.1%)    | 1/1975 (<0.1%)    |
|                                                                     | Overall          | 0/1432            | 1/1452 (<0.1%)    | 1/2884 (<0.1%)    |
| Ovarian enlargement                                                 | 1st year         | 1/1432 (<0.1%)    | 0/1452            | 1/2884 (<0.1%)    |
|                                                                     | 2nd year         | 0/1166            | 1/1206 (<0.1%)    | 1/2372 (<0.1%)    |
|                                                                     | Overall          | 1/1432 (<0.1%)    | 1/1452 (<0.1%)    | 2/2884 (<0.1%)    |
| Ovarian mass                                                        | 2nd year         | 1/1166 (<0.1%)    | 2/1206 ( 0.2%)    | 3/2372 ( 0.1%)    |
|                                                                     | Overall          | 1/1432 (<0.1%)    | 2/1452 ( 0.1%)    | 3/2884 ( 0.1%)    |



**Table 14.3.1 / 9: Number of subjects with adverse events by primary system organ class, preferred term and year (FAS)**

| Primary system organ class<br>Preferred term<br>MedDRA version 14.0 | YEAR OF<br>ONSET | LCS12           | LCS16            | Total            |
|---------------------------------------------------------------------|------------------|-----------------|------------------|------------------|
| Ovulation pain                                                      | 1st year         | 4/1432 ( 0.3%)  | 2/1452 ( 0.1%)   | 6/2884 ( 0.2%)   |
|                                                                     | 2nd year         | 1/1166 (<0.1%)  | 0/1206           | 1/2372 (<0.1%)   |
|                                                                     | 3rd year         | 1/ 963 ( 0.1%)  | 0/1012           | 1/1975 (<0.1%)   |
|                                                                     | Overall          | 6/1432 ( 0.4%)  | 2/1452 ( 0.1%)   | 8/2884 ( 0.3%)   |
| Parovarian cyst                                                     | 1st year         | 2/1432 ( 0.1%)  | 0/1452           | 2/2884 (<0.1%)   |
|                                                                     | 3rd year         | 1/ 963 ( 0.1%)  | 0/1012           | 1/1975 (<0.1%)   |
|                                                                     | Overall          | 3/1432 ( 0.2%)  | 0/1452           | 3/2884 ( 0.1%)   |
| Pelvic adhesions                                                    | 3rd year         | 0/ 963          | 1/1012 (<0.1%)   | 1/1975 (<0.1%)   |
|                                                                     | Overall          | 0/1432          | 1/1452 (<0.1%)   | 1/2884 (<0.1%)   |
| Pelvic congestion                                                   | 1st year         | 1/1432 (<0.1%)  | 0/1452           | 1/2884 (<0.1%)   |
|                                                                     | Overall          | 1/1432 (<0.1%)  | 0/1452           | 1/2884 (<0.1%)   |
| Pelvic discomfort                                                   | 1st year         | 4/1432 ( 0.3%)  | 0/1452           | 4/2884 ( 0.1%)   |
|                                                                     | 2nd year         | 1/1166 (<0.1%)  | 1/1206 (<0.1%)   | 2/2372 (<0.1%)   |
|                                                                     | 3rd year         | 1/ 963 ( 0.1%)  | 1/1012 (<0.1%)   | 2/1975 ( 0.1%)   |
|                                                                     | Overall          | 6/1432 ( 0.4%)  | 2/1452 ( 0.1%)   | 8/2884 ( 0.3%)   |
| Pelvic fluid collection                                             | 3rd year         | 1/ 963 ( 0.1%)  | 0/1012           | 1/1975 (<0.1%)   |
|                                                                     | Overall          | 1/1432 (<0.1%)  | 0/1452           | 1/2884 (<0.1%)   |
| Pelvic pain                                                         | 1st year         | 71/1432 ( 5.0%) | 97/1452 ( 6.7%)  | 168/2884 ( 5.8%) |
|                                                                     | 2nd year         | 21/1166 ( 1.8%) | 24/1206 ( 2.0%)  | 45/2372 ( 1.9%)  |
|                                                                     | 3rd year         | 10/ 963 ( 1.0%) | 12/1012 ( 1.2%)  | 22/1975 ( 1.1%)  |
|                                                                     | Overall          | 96/1432 ( 6.7%) | 123/1452 ( 8.5%) | 219/2884 ( 7.6%) |
| Pelvic prolapse                                                     | 1st year         | 1/1432 (<0.1%)  | 0/1452           | 1/2884 (<0.1%)   |
|                                                                     | Overall          | 1/1432 (<0.1%)  | 0/1452           | 1/2884 (<0.1%)   |
| Perineal pain                                                       | 2nd year         | 1/1166 (<0.1%)  | 0/1206           | 1/2372 (<0.1%)   |
|                                                                     | Overall          | 1/1432 (<0.1%)  | 0/1452           | 1/2884 (<0.1%)   |
| Polycystic ovaries                                                  | 1st year         | 2/1432 ( 0.1%)  | 1/1452 (<0.1%)   | 3/2884 ( 0.1%)   |
|                                                                     | 2nd year         | 0/1166          | 1/1206 (<0.1%)   | 1/2372 (<0.1%)   |
|                                                                     | 3rd year         | 3/ 963 ( 0.3%)  | 0/1012           | 3/1975 ( 0.2%)   |
|                                                                     | Overall          | 4/1432 ( 0.3%)  | 2/1452 ( 0.1%)   | 6/2884 ( 0.2%)   |

**Table 14.3.1 / 9: Number of subjects with adverse events by primary system organ class, preferred term and year (FAS)**

| Primary system organ class<br>Preferred term<br>MedDRA version 14.0 | YEAR OF<br>ONSET | LCS12           |  | LCS16           |  | Total           |
|---------------------------------------------------------------------|------------------|-----------------|--|-----------------|--|-----------------|
|                                                                     |                  |                 |  |                 |  |                 |
| Polymenorrhoea                                                      | 2nd year         | 1/1166 ( <0.1%) |  | 1/1206 ( <0.1%) |  | 2/2372 ( <0.1%) |
|                                                                     | Overall          | 1/1432 ( <0.1%) |  | 1/1452 ( <0.1%) |  | 2/2884 ( <0.1%) |
| Premenstrual syndrome                                               | 1st year         | 9/1432 ( 0.6%)  |  | 8/1452 ( 0.6%)  |  | 17/2884 ( 0.6%) |
|                                                                     | 2nd year         | 6/1166 ( 0.5%)  |  | 2/1206 ( 0.2%)  |  | 8/2372 ( 0.3%)  |
|                                                                     | 3rd year         | 2/ 963 ( 0.2%)  |  | 2/1012 ( 0.2%)  |  | 4/1975 ( 0.2%)  |
|                                                                     | Overall          | 17/1432 ( 1.2%) |  | 12/1452 ( 0.8%) |  | 29/2884 ( 1.0%) |
| Pruritus genital                                                    | 1st year         | 1/1432 ( <0.1%) |  | 0/1452          |  | 1/2884 ( <0.1%) |
|                                                                     | Overall          | 1/1432 ( <0.1%) |  | 0/1452          |  | 1/2884 ( <0.1%) |
| Uterine cervical erosion                                            | 1st year         | 1/1432 ( <0.1%) |  | 0/1452          |  | 1/2884 ( <0.1%) |
|                                                                     | Overall          | 1/1432 ( <0.1%) |  | 0/1452          |  | 1/2884 ( <0.1%) |
| Uterine cervical pain                                               | 1st year         | 2/1432 ( 0.1%)  |  | 0/1452          |  | 2/2884 ( <0.1%) |
|                                                                     | Overall          | 2/1432 ( 0.1%)  |  | 0/1452          |  | 2/2884 ( <0.1%) |
| Uterine haemorrhage                                                 | 1st year         | 6/1432 ( 0.4%)  |  | 4/1452 ( 0.3%)  |  | 10/2884 ( 0.3%) |
|                                                                     | 2nd year         | 1/1166 ( <0.1%) |  | 2/1206 ( 0.2%)  |  | 3/2372 ( 0.1%)  |
|                                                                     | 3rd year         | 1/ 963 ( 0.1%)  |  | 1/1012 ( <0.1%) |  | 2/1975 ( 0.1%)  |
|                                                                     | Overall          | 8/1432 ( 0.6%)  |  | 7/1452 ( 0.5%)  |  | 15/2884 ( 0.5%) |
| Uterine inflammation                                                | 2nd year         | 0/1166          |  | 1/1206 ( <0.1%) |  | 1/2372 ( <0.1%) |
|                                                                     | Overall          | 0/1432          |  | 1/1452 ( <0.1%) |  | 1/2884 ( <0.1%) |
| Uterine pain                                                        | 1st year         | 1/1432 ( <0.1%) |  | 2/1452 ( 0.1%)  |  | 3/2884 ( 0.1%)  |
|                                                                     | 2nd year         | 1/1166 ( <0.1%) |  | 0/1206          |  | 1/2372 ( <0.1%) |
|                                                                     | Overall          | 2/1432 ( 0.1%)  |  | 2/1452 ( 0.1%)  |  | 4/2884 ( 0.1%)  |
| Uterine polyp                                                       | 1st year         | 1/1432 ( <0.1%) |  | 0/1452          |  | 1/2884 ( <0.1%) |
|                                                                     | 2nd year         | 1/1166 ( <0.1%) |  | 0/1206          |  | 1/2372 ( <0.1%) |
|                                                                     | 3rd year         | 0/ 963          |  | 1/1012 ( <0.1%) |  | 1/1975 ( <0.1%) |
|                                                                     | Overall          | 2/1432 ( 0.1%)  |  | 1/1452 ( <0.1%) |  | 3/2884 ( 0.1%)  |
| Uterine prolapse                                                    | 3rd year         | 1/ 963 ( 0.1%)  |  | 0/1012          |  | 1/1975 ( <0.1%) |
|                                                                     | Overall          | 1/1432 ( <0.1%) |  | 0/1452          |  | 1/2884 ( <0.1%) |

**Table 14.3.1 / 9: Number of subjects with adverse events by primary system organ class, preferred term and year (FAS)**

| Primary system organ class<br>Preferred term<br>MedDRA version 14.0 | YEAR OF<br>ONSET | LCS12           | LCS16           | Total            |
|---------------------------------------------------------------------|------------------|-----------------|-----------------|------------------|
| Uterine spasm                                                       | 1st year         | 27/1432 ( 1.9%) | 37/1452 ( 2.5%) | 64/2884 ( 2.2%)  |
|                                                                     | 2nd year         | 3/1166 ( 0.3%)  | 0/1206          | 3/2372 ( 0.1%)   |
|                                                                     | 3rd year         | 1/ 963 ( 0.1%)  | 2/1012 ( 0.2%)  | 3/1975 ( 0.2%)   |
|                                                                     | Overall          | 30/1432 ( 2.1%) | 39/1452 ( 2.7%) | 69/2884 ( 2.4%)  |
| Uterine tenderness                                                  | 1st year         | 1/1432 ( <0.1%) | 2/1452 ( 0.1%)  | 3/2884 ( 0.1%)   |
|                                                                     | Overall          | 1/1432 ( <0.1%) | 2/1452 ( 0.1%)  | 3/2884 ( 0.1%)   |
| Vaginal cyst                                                        | 1st year         | 1/1432 ( <0.1%) | 0/1452          | 1/2884 ( <0.1%)  |
|                                                                     | Overall          | 1/1432 ( <0.1%) | 0/1452          | 1/2884 ( <0.1%)  |
| Vaginal discharge                                                   | 1st year         | 36/1432 ( 2.5%) | 33/1452 ( 2.3%) | 69/2884 ( 2.4%)  |
|                                                                     | 2nd year         | 20/1166 ( 1.7%) | 24/1206 ( 2.0%) | 44/2372 ( 1.9%)  |
|                                                                     | 3rd year         | 6/ 963 ( 0.6%)  | 15/1012 ( 1.5%) | 21/1975 ( 1.1%)  |
|                                                                     | Overall          | 55/1432 ( 3.8%) | 58/1452 ( 4.0%) | 113/2884 ( 3.9%) |
| Vaginal disorder                                                    | 1st year         | 3/1432 ( 0.2%)  | 2/1452 ( 0.1%)  | 5/2884 ( 0.2%)   |
|                                                                     | 3rd year         | 1/ 963 ( 0.1%)  | 2/1012 ( 0.2%)  | 3/1975 ( 0.2%)   |
|                                                                     | Overall          | 4/1432 ( 0.3%)  | 4/1452 ( 0.3%)  | 8/2884 ( 0.3%)   |
| Vaginal haemorrhage                                                 | 1st year         | 51/1432 ( 3.6%) | 53/1452 ( 3.7%) | 104/2884 ( 3.6%) |
|                                                                     | 2nd year         | 13/1166 ( 1.1%) | 15/1206 ( 1.2%) | 28/2372 ( 1.2%)  |
|                                                                     | 3rd year         | 3/ 963 ( 0.3%)  | 5/1012 ( 0.5%)  | 8/1975 ( 0.4%)   |
|                                                                     | Overall          | 66/1432 ( 4.6%) | 73/1452 ( 5.0%) | 139/2884 ( 4.8%) |
| Vaginal lesion                                                      | 1st year         | 1/1432 ( <0.1%) | 0/1452          | 1/2884 ( <0.1%)  |
|                                                                     | Overall          | 1/1432 ( <0.1%) | 0/1452          | 1/2884 ( <0.1%)  |
| Vaginal odour                                                       | 1st year         | 1/1432 ( <0.1%) | 5/1452 ( 0.3%)  | 6/2884 ( 0.2%)   |
|                                                                     | 2nd year         | 1/1166 ( <0.1%) | 3/1206 ( 0.2%)  | 4/2372 ( 0.2%)   |
|                                                                     | 3rd year         | 4/ 963 ( 0.4%)  | 1/1012 ( <0.1%) | 5/1975 ( 0.3%)   |
|                                                                     | Overall          | 6/1432 ( 0.4%)  | 7/1452 ( 0.5%)  | 13/2884 ( 0.5%)  |
| Vaginal perforation                                                 | 2nd year         | 0/1166          | 1/1206 ( <0.1%) | 1/2372 ( <0.1%)  |
|                                                                     | Overall          | 0/1432          | 1/1452 ( <0.1%) | 1/2884 ( <0.1%)  |
| Vaginal ulceration                                                  | 2nd year         | 0/1166          | 1/1206 ( <0.1%) | 1/2372 ( <0.1%)  |
|                                                                     | Overall          | 0/1432          | 1/1452 ( <0.1%) | 1/2884 ( <0.1%)  |

**Table 14.3.1 / 9: Number of subjects with adverse events by primary system organ class, preferred term and year (FAS)**

| Primary system organ class<br>Preferred term<br>MedDRA version 14.0 | YEAR OF<br>ONSET | LCS12           | LCS16           | Total            |
|---------------------------------------------------------------------|------------------|-----------------|-----------------|------------------|
| Vaginal wall congestion                                             | 2nd year         | 1/1166 ( <0.1%) | 0/1206          | 1/2372 ( <0.1%)  |
|                                                                     | Overall          | 1/1432 ( <0.1%) | 0/1452          | 1/2884 ( <0.1%)  |
| Vulval disorder                                                     | 3rd year         | 1/ 963 ( 0.1%)  | 0/1012          | 1/1975 ( <0.1%)  |
|                                                                     | Overall          | 1/1432 ( <0.1%) | 0/1452          | 1/2884 ( <0.1%)  |
| Vulvovaginal burning sensation                                      | 1st year         | 1/1432 ( <0.1%) | 1/1452 ( <0.1%) | 2/2884 ( <0.1%)  |
|                                                                     | 2nd year         | 0/1166          | 1/1206 ( <0.1%) | 1/2372 ( <0.1%)  |
|                                                                     | 3rd year         | 0/ 963          | 2/1012 ( 0.2%)  | 2/1975 ( 0.1%)   |
|                                                                     | Overall          | 1/1432 ( <0.1%) | 4/1452 ( 0.3%)  | 5/2884 ( 0.2%)   |
| Vulvovaginal discomfort                                             | 1st year         | 4/1432 ( 0.3%)  | 1/1452 ( <0.1%) | 5/2884 ( 0.2%)   |
|                                                                     | 2nd year         | 0/1166          | 1/1206 ( <0.1%) | 1/2372 ( <0.1%)  |
|                                                                     | 3rd year         | 2/ 963 ( 0.2%)  | 0/1012          | 2/1975 ( 0.1%)   |
|                                                                     | Overall          | 6/1432 ( 0.4%)  | 2/1452 ( 0.1%)  | 8/2884 ( 0.3%)   |
| Vulvovaginal dryness                                                | 1st year         | 2/1432 ( 0.1%)  | 5/1452 ( 0.3%)  | 7/2884 ( 0.2%)   |
|                                                                     | 2nd year         | 1/1166 ( <0.1%) | 0/1206          | 1/2372 ( <0.1%)  |
|                                                                     | Overall          | 3/1432 ( 0.2%)  | 5/1452 ( 0.3%)  | 8/2884 ( 0.3%)   |
| Vulvovaginal erythema                                               | 1st year         | 0/1432          | 1/1452 ( <0.1%) | 1/2884 ( <0.1%)  |
|                                                                     | 2nd year         | 0/1166          | 1/1206 ( <0.1%) | 1/2372 ( <0.1%)  |
|                                                                     | Overall          | 0/1432          | 2/1452 ( 0.1%)  | 2/2884 ( <0.1%)  |
| Vulvovaginal pain                                                   | 1st year         | 2/1432 ( 0.1%)  | 2/1452 ( 0.1%)  | 4/2884 ( 0.1%)   |
|                                                                     | 3rd year         | 1/ 963 ( 0.1%)  | 0/1012          | 1/1975 ( <0.1%)  |
|                                                                     | Overall          | 3/1432 ( 0.2%)  | 2/1452 ( 0.1%)  | 5/2884 ( 0.2%)   |
| Vulvovaginal pruritus                                               | 1st year         | 10/1432 ( 0.7%) | 11/1452 ( 0.8%) | 21/2884 ( 0.7%)  |
|                                                                     | 2nd year         | 4/1166 ( 0.3%)  | 4/1206 ( 0.3%)  | 8/2372 ( 0.3%)   |
|                                                                     | 3rd year         | 3/ 963 ( 0.3%)  | 4/1012 ( 0.4%)  | 7/1975 ( 0.4%)   |
|                                                                     | Overall          | 16/1432 ( 1.1%) | 17/1452 ( 1.2%) | 33/2884 ( 1.1%)  |
| Vulvovaginal swelling                                               | 2nd year         | 1/1166 ( <0.1%) | 1/1206 ( <0.1%) | 2/2372 ( <0.1%)  |
|                                                                     | Overall          | 1/1432 ( <0.1%) | 1/1452 ( <0.1%) | 2/2884 ( <0.1%)  |
| Respiratory, thoracic and mediastinal disorders                     | 1st year         | 36/1432 ( 2.5%) | 40/1452 ( 2.8%) | 76/2884 ( 2.6%)  |
|                                                                     | 2nd year         | 31/1166 ( 2.7%) | 20/1206 ( 1.7%) | 51/2372 ( 2.2%)  |
|                                                                     | 3rd year         | 14/ 963 ( 1.5%) | 18/1012 ( 1.8%) | 32/1975 ( 1.6%)  |
|                                                                     | Overall          | 71/1432 ( 5.0%) | 70/1452 ( 4.8%) | 141/2884 ( 4.9%) |

**Table 14.3.1 / 9: Number of subjects with adverse events by primary system organ class, preferred term and year (FAS)**

| Primary system organ class<br>Preferred term<br>MedDRA version 14.0 | YEAR OF<br>ONSET | LCS12           |  | LCS16           |  | Total           |
|---------------------------------------------------------------------|------------------|-----------------|--|-----------------|--|-----------------|
|                                                                     |                  |                 |  |                 |  |                 |
| Allergic sinusitis                                                  | 1st year         | 1/1432 ( <0.1%) |  | 1/1452 ( <0.1%) |  | 2/2884 ( <0.1%) |
|                                                                     | Overall          | 1/1432 ( <0.1%) |  | 1/1452 ( <0.1%) |  | 2/2884 ( <0.1%) |
| Asthma                                                              | 1st year         | 4/1432 ( 0.3%)  |  | 4/1452 ( 0.3%)  |  | 8/2884 ( 0.3%)  |
|                                                                     | 2nd year         | 6/1166 ( 0.5%)  |  | 4/1206 ( 0.3%)  |  | 10/2372 ( 0.4%) |
|                                                                     | 3rd year         | 3/ 963 ( 0.3%)  |  | 4/1012 ( 0.4%)  |  | 7/1975 ( 0.4%)  |
|                                                                     | Overall          | 11/1432 ( 0.8%) |  | 11/1452 ( 0.8%) |  | 22/2884 ( 0.8%) |
| Atelectasis                                                         | 3rd year         | 0/ 963          |  | 1/1012 ( <0.1%) |  | 1/1975 ( <0.1%) |
|                                                                     | Overall          | 0/1432          |  | 1/1452 ( <0.1%) |  | 1/2884 ( <0.1%) |
| Bronchospasm                                                        | 1st year         | 2/1432 ( 0.1%)  |  | 0/1452          |  | 2/2884 ( <0.1%) |
|                                                                     | 2nd year         | 0/1166          |  | 1/1206 ( <0.1%) |  | 1/2372 ( <0.1%) |
|                                                                     | 3rd year         | 0/ 963          |  | 1/1012 ( <0.1%) |  | 1/1975 ( <0.1%) |
|                                                                     | Overall          | 2/1432 ( 0.1%)  |  | 2/1452 ( 0.1%)  |  | 4/2884 ( 0.1%)  |
| Cough                                                               | 1st year         | 3/1432 ( 0.2%)  |  | 11/1452 ( 0.8%) |  | 14/2884 ( 0.5%) |
|                                                                     | 2nd year         | 5/1166 ( 0.4%)  |  | 3/1206 ( 0.2%)  |  | 8/2372 ( 0.3%)  |
|                                                                     | 3rd year         | 6/ 963 ( 0.6%)  |  | 1/1012 ( <0.1%) |  | 7/1975 ( 0.4%)  |
|                                                                     | Overall          | 13/1432 ( 0.9%) |  | 13/1452 ( 0.9%) |  | 26/2884 ( 0.9%) |
| Diaphragmatic hernia                                                | 1st year         | 0/1432          |  | 1/1452 ( <0.1%) |  | 1/2884 ( <0.1%) |
|                                                                     | Overall          | 0/1432          |  | 1/1452 ( <0.1%) |  | 1/2884 ( <0.1%) |
| Dyspnoea                                                            | 2nd year         | 1/1166 ( <0.1%) |  | 0/1206          |  | 1/2372 ( <0.1%) |
|                                                                     | 3rd year         | 0/ 963          |  | 2/1012 ( 0.2%)  |  | 2/1975 ( 0.1%)  |
|                                                                     | Overall          | 1/1432 ( <0.1%) |  | 2/1452 ( 0.1%)  |  | 3/2884 ( 0.1%)  |
| Epiglottic cyst                                                     | 1st year         | 1/1432 ( <0.1%) |  | 0/1452          |  | 1/2884 ( <0.1%) |
|                                                                     | Overall          | 1/1432 ( <0.1%) |  | 0/1452          |  | 1/2884 ( <0.1%) |
| Epistaxis                                                           | 1st year         | 2/1432 ( 0.1%)  |  | 0/1452          |  | 2/2884 ( <0.1%) |
|                                                                     | 2nd year         | 1/1166 ( <0.1%) |  | 0/1206          |  | 1/2372 ( <0.1%) |
|                                                                     | 3rd year         | 0/ 963          |  | 1/1012 ( <0.1%) |  | 1/1975 ( <0.1%) |
|                                                                     | Overall          | 3/1432 ( 0.2%)  |  | 1/1452 ( <0.1%) |  | 4/2884 ( 0.1%)  |
| Hyperventilation                                                    | 1st year         | 1/1432 ( <0.1%) |  | 1/1452 ( <0.1%) |  | 2/2884 ( <0.1%) |
|                                                                     | Overall          | 1/1432 ( <0.1%) |  | 1/1452 ( <0.1%) |  | 2/2884 ( <0.1%) |

**Table 14.3.1 / 9: Number of subjects with adverse events by primary system organ class, preferred term and year (FAS)**

| Primary system organ class<br>Preferred term<br>MedDRA version 14.0 | YEAR OF<br>ONSET | LCS12           | LCS16           | Total           |
|---------------------------------------------------------------------|------------------|-----------------|-----------------|-----------------|
| Hypoxia                                                             | 3rd year         | 0/ 963          | 1/1012 ( <0.1%) | 1/1975 ( <0.1%) |
|                                                                     | Overall          | 0/1432          | 1/1452 ( <0.1%) | 1/2884 ( <0.1%) |
| Nasal congestion                                                    | 1st year         | 1/1432 ( <0.1%) | 1/1452 ( <0.1%) | 2/2884 ( <0.1%) |
|                                                                     | 2nd year         | 1/1166 ( <0.1%) | 0/1206          | 1/2372 ( <0.1%) |
|                                                                     | Overall          | 2/1432 ( 0.1%)  | 1/1452 ( <0.1%) | 3/2884 ( 0.1%)  |
| Nasal disorder                                                      | 3rd year         | 1/ 963 ( 0.1%)  | 0/1012          | 1/1975 ( <0.1%) |
|                                                                     | Overall          | 1/1432 ( <0.1%) | 0/1452          | 1/2884 ( <0.1%) |
| Nasal oedema                                                        | 1st year         | 1/1432 ( <0.1%) | 0/1452          | 1/2884 ( <0.1%) |
|                                                                     | Overall          | 1/1432 ( <0.1%) | 0/1452          | 1/2884 ( <0.1%) |
| Nasal polyps                                                        | 1st year         | 1/1432 ( <0.1%) | 0/1452          | 1/2884 ( <0.1%) |
|                                                                     | 2nd year         | 0/1166          | 1/1206 ( <0.1%) | 1/2372 ( <0.1%) |
|                                                                     | Overall          | 1/1432 ( <0.1%) | 1/1452 ( <0.1%) | 2/2884 ( <0.1%) |
| Oropharyngeal pain                                                  | 1st year         | 7/1432 ( 0.5%)  | 10/1452 ( 0.7%) | 17/2884 ( 0.6%) |
|                                                                     | 2nd year         | 9/1166 ( 0.8%)  | 7/1206 ( 0.6%)  | 16/2372 ( 0.7%) |
|                                                                     | 3rd year         | 3/ 963 ( 0.3%)  | 2/1012 ( 0.2%)  | 5/1975 ( 0.3%)  |
|                                                                     | Overall          | 17/1432 ( 1.2%) | 17/1452 ( 1.2%) | 34/2884 ( 1.2%) |
| Pleural effusion                                                    | 3rd year         | 0/ 963          | 1/1012 ( <0.1%) | 1/1975 ( <0.1%) |
|                                                                     | Overall          | 0/1432          | 1/1452 ( <0.1%) | 1/2884 ( <0.1%) |
| Pleurisy                                                            | 1st year         | 0/1432          | 1/1452 ( <0.1%) | 1/2884 ( <0.1%) |
|                                                                     | 2nd year         | 1/1166 ( <0.1%) | 0/1206          | 1/2372 ( <0.1%) |
|                                                                     | Overall          | 1/1432 ( <0.1%) | 1/1452 ( <0.1%) | 2/2884 ( <0.1%) |
| Pneumonitis                                                         | 1st year         | 0/1432          | 1/1452 ( <0.1%) | 1/2884 ( <0.1%) |
|                                                                     | Overall          | 0/1432          | 1/1452 ( <0.1%) | 1/2884 ( <0.1%) |
| Pneumothorax                                                        | 2nd year         | 1/1166 ( <0.1%) | 0/1206          | 1/2372 ( <0.1%) |
|                                                                     | Overall          | 1/1432 ( <0.1%) | 0/1452          | 1/2884 ( <0.1%) |
| Pulmonary congestion                                                | 1st year         | 1/1432 ( <0.1%) | 0/1452          | 1/2884 ( <0.1%) |
|                                                                     | Overall          | 1/1432 ( <0.1%) | 0/1452          | 1/2884 ( <0.1%) |

**Table 14.3.1 / 9: Number of subjects with adverse events by primary system organ class, preferred term and year (FAS)**

| Primary system organ class<br>Preferred term<br>MedDRA version 14.0 | YEAR OF<br>ONSET | YEAR OF         |                 | Total           |
|---------------------------------------------------------------------|------------------|-----------------|-----------------|-----------------|
|                                                                     |                  | LCS12           | LCS16           |                 |
| Respiratory tract congestion                                        | 2nd year         | 1/1166 ( <0.1%) | 0/1206          | 1/2372 ( <0.1%) |
|                                                                     | Overall          | 1/1432 ( <0.1%) | 0/1452          | 1/2884 ( <0.1%) |
| Respiratory tract inflammation                                      | 2nd year         | 1/1166 ( <0.1%) | 0/1206          | 1/2372 ( <0.1%) |
|                                                                     | Overall          | 1/1432 ( <0.1%) | 0/1452          | 1/2884 ( <0.1%) |
| Rhinitis allergic                                                   | 1st year         | 6/1432 ( 0.4%)  | 7/1452 ( 0.5%)  | 13/2884 ( 0.5%) |
|                                                                     | 2nd year         | 3/1166 ( 0.3%)  | 2/1206 ( 0.2%)  | 5/2372 ( 0.2%)  |
|                                                                     | 3rd year         | 2/ 963 ( 0.2%)  | 4/1012 ( 0.4%)  | 6/1975 ( 0.3%)  |
|                                                                     | Overall          | 10/1432 ( 0.7%) | 11/1452 ( 0.8%) | 21/2884 ( 0.7%) |
| Rhinitis seasonal                                                   | 1st year         | 1/1432 ( <0.1%) | 2/1452 ( 0.1%)  | 3/2884 ( 0.1%)  |
|                                                                     | Overall          | 1/1432 ( <0.1%) | 2/1452 ( 0.1%)  | 3/2884 ( 0.1%)  |
| Rhinorrhoea                                                         | 1st year         | 1/1432 ( <0.1%) | 0/1452          | 1/2884 ( <0.1%) |
|                                                                     | Overall          | 1/1432 ( <0.1%) | 0/1452          | 1/2884 ( <0.1%) |
| Sinus congestion                                                    | 1st year         | 4/1432 ( 0.3%)  | 0/1452          | 4/2884 ( 0.1%)  |
|                                                                     | 2nd year         | 1/1166 ( <0.1%) | 2/1206 ( 0.2%)  | 3/2372 ( 0.1%)  |
|                                                                     | 3rd year         | 1/ 963 ( 0.1%)  | 0/1012          | 1/1975 ( <0.1%) |
|                                                                     | Overall          | 6/1432 ( 0.4%)  | 2/1452 ( 0.1%)  | 8/2884 ( 0.3%)  |
| Sinus polyp                                                         | 2nd year         | 0/1166          | 1/1206 ( <0.1%) | 1/2372 ( <0.1%) |
|                                                                     | Overall          | 0/1432          | 1/1452 ( <0.1%) | 1/2884 ( <0.1%) |
| Sleep apnoea syndrome                                               | 3rd year         | 0/ 963          | 1/1012 ( <0.1%) | 1/1975 ( <0.1%) |
|                                                                     | Overall          | 0/1432          | 1/1452 ( <0.1%) | 1/2884 ( <0.1%) |
| Tonsillar disorder                                                  | 3rd year         | 0/ 963          | 1/1012 ( <0.1%) | 1/1975 ( <0.1%) |
|                                                                     | Overall          | 0/1432          | 1/1452 ( <0.1%) | 1/2884 ( <0.1%) |
| Upper respiratory tract inflammation                                | 1st year         | 0/1432          | 1/1452 ( <0.1%) | 1/2884 ( <0.1%) |
|                                                                     | 2nd year         | 0/1166          | 1/1206 ( <0.1%) | 1/2372 ( <0.1%) |
|                                                                     | 3rd year         | 0/ 963          | 1/1012 ( <0.1%) | 1/1975 ( <0.1%) |
|                                                                     | Overall          | 0/1432          | 2/1452 ( 0.1%)  | 2/2884 ( <0.1%) |
| Wheezing                                                            | 1st year         | 1/1432 ( <0.1%) | 0/1452          | 1/2884 ( <0.1%) |
|                                                                     | Overall          | 1/1432 ( <0.1%) | 0/1452          | 1/2884 ( <0.1%) |

**Table 14.3.1 / 9: Number of subjects with adverse events by primary system organ class, preferred term and year (FAS)**

| Primary system organ class<br>Preferred term<br>MedDRA version 14.0 | YEAR OF<br>ONSET | LCS12             | LCS16             | Total             |
|---------------------------------------------------------------------|------------------|-------------------|-------------------|-------------------|
| Skin and subcutaneous tissue disorders                              | 1st year         | 190/1432 ( 13.3%) | 183/1452 ( 12.6%) | 373/2884 ( 12.9%) |
|                                                                     | 2nd year         | 45/1166 ( 3.9%)   | 65/1206 ( 5.4%)   | 110/2372 ( 4.6%)  |
|                                                                     | 3rd year         | 25/ 963 ( 2.6%)   | 28/1012 ( 2.8%)   | 53/1975 ( 2.7%)   |
|                                                                     | Overall          | 242/1432 ( 16.9%) | 254/1452 ( 17.5%) | 496/2884 ( 17.2%) |
|                                                                     |                  |                   |                   |                   |
| Acne                                                                | 1st year         | 139/1432 ( 9.7%)  | 128/1452 ( 8.8%)  | 267/2884 ( 9.3%)  |
|                                                                     | 2nd year         | 20/1166 ( 1.7%)   | 33/1206 ( 2.7%)   | 53/2372 ( 2.2%)   |
|                                                                     | 3rd year         | 10/ 963 ( 1.0%)   | 13/1012 ( 1.3%)   | 23/1975 ( 1.2%)   |
|                                                                     | Overall          | 163/1432 ( 11.4%) | 169/1452 ( 11.6%) | 332/2884 ( 11.5%) |
|                                                                     |                  |                   |                   |                   |
| Acne cystic                                                         | 1st year         | 1/1432 ( <0.1%)   | 0/1452            | 1/2884 ( <0.1%)   |
|                                                                     | 2nd year         | 1/1166 ( <0.1%)   | 0/1206            | 1/2372 ( <0.1%)   |
|                                                                     | Overall          | 2/1432 ( 0.1%)    | 0/1452            | 2/2884 ( <0.1%)   |
| Alopecia                                                            | 1st year         | 10/1432 ( 0.7%)   | 10/1452 ( 0.7%)   | 20/2884 ( 0.7%)   |
|                                                                     | 2nd year         | 6/1166 ( 0.5%)    | 1/1206 ( <0.1%)   | 7/2372 ( 0.3%)    |
|                                                                     | 3rd year         | 0/ 963            | 2/1012 ( 0.2%)    | 2/1975 ( 0.1%)    |
|                                                                     | Overall          | 15/1432 ( 1.0%)   | 13/1452 ( 0.9%)   | 28/2884 ( 1.0%)   |
|                                                                     |                  |                   |                   |                   |
| Alopecia areata                                                     | 2nd year         | 1/1166 ( <0.1%)   | 0/1206            | 1/2372 ( <0.1%)   |
|                                                                     | 3rd year         | 1/ 963 ( 0.1%)    | 0/1012            | 1/1975 ( <0.1%)   |
|                                                                     | Overall          | 2/1432 ( 0.1%)    | 0/1452            | 2/2884 ( <0.1%)   |
| Chloasma                                                            | 1st year         | 3/1432 ( 0.2%)    | 0/1452            | 3/2884 ( 0.1%)    |
|                                                                     | Overall          | 3/1432 ( 0.2%)    | 0/1452            | 3/2884 ( 0.1%)    |
| Cold sweat                                                          | 3rd year         | 1/ 963 ( 0.1%)    | 0/1012            | 1/1975 ( <0.1%)   |
|                                                                     | Overall          | 1/1432 ( <0.1%)   | 0/1452            | 1/2884 ( <0.1%)   |
| Dandruff                                                            | 1st year         | 1/1432 ( <0.1%)   | 1/1452 ( <0.1%)   | 2/2884 ( <0.1%)   |
|                                                                     | Overall          | 1/1432 ( <0.1%)   | 1/1452 ( <0.1%)   | 2/2884 ( <0.1%)   |
| Dermal cyst                                                         | 1st year         | 2/1432 ( 0.1%)    | 0/1452            | 2/2884 ( <0.1%)   |
|                                                                     | Overall          | 2/1432 ( 0.1%)    | 0/1452            | 2/2884 ( <0.1%)   |
| Dermatitis                                                          | 1st year         | 4/1432 ( 0.3%)    | 5/1452 ( 0.3%)    | 9/2884 ( 0.3%)    |
|                                                                     | 2nd year         | 3/1166 ( 0.3%)    | 2/1206 ( 0.2%)    | 5/2372 ( 0.2%)    |
|                                                                     | 3rd year         | 1/ 963 ( 0.1%)    | 0/1012            | 1/1975 ( <0.1%)   |
|                                                                     | Overall          | 8/1432 ( 0.6%)    | 7/1452 ( 0.5%)    | 15/2884 ( 0.5%)   |



**Table 14.3.1 / 9: Number of subjects with adverse events by primary system organ class, preferred term and year (FAS)**

| Primary system organ class<br>Preferred term<br>MedDRA version 14.0 | YEAR OF<br>ONSET | LCS12           | LCS16           | Total           |
|---------------------------------------------------------------------|------------------|-----------------|-----------------|-----------------|
| Dermatitis allergic                                                 | 1st year         | 2/1432 ( 0.1%)  | 1/1452 ( <0.1%) | 3/2884 ( 0.1%)  |
|                                                                     | 2nd year         | 1/1166 ( <0.1%) | 2/1206 ( 0.2%)  | 3/2372 ( 0.1%)  |
|                                                                     | 3rd year         | 3/ 963 ( 0.3%)  | 2/1012 ( 0.2%)  | 5/1975 ( 0.3%)  |
|                                                                     | Overall          | 6/1432 ( 0.4%)  | 5/1452 ( 0.3%)  | 11/2884 ( 0.4%) |
| Dermatitis atopic                                                   | 1st year         | 0/1432          | 3/1452 ( 0.2%)  | 3/2884 ( 0.1%)  |
|                                                                     | 2nd year         | 2/1166 ( 0.2%)  | 1/1206 ( <0.1%) | 3/2372 ( 0.1%)  |
|                                                                     | 3rd year         | 0/ 963          | 2/1012 ( 0.2%)  | 2/1975 ( 0.1%)  |
|                                                                     | Overall          | 2/1432 ( 0.1%)  | 5/1452 ( 0.3%)  | 7/2884 ( 0.2%)  |
| Dermatitis contact                                                  | 1st year         | 1/1432 ( <0.1%) | 3/1452 ( 0.2%)  | 4/2884 ( 0.1%)  |
|                                                                     | 2nd year         | 1/1166 ( <0.1%) | 0/1206          | 1/2372 ( <0.1%) |
|                                                                     | 3rd year         | 0/ 963          | 2/1012 ( 0.2%)  | 2/1975 ( 0.1%)  |
|                                                                     | Overall          | 2/1432 ( 0.1%)  | 5/1452 ( 0.3%)  | 7/2884 ( 0.2%)  |
| Drug eruption                                                       | 2nd year         | 1/1166 ( <0.1%) | 0/1206          | 1/2372 ( <0.1%) |
|                                                                     | Overall          | 1/1432 ( <0.1%) | 0/1452          | 1/2884 ( <0.1%) |
| Dry skin                                                            | 2nd year         | 0/1166          | 1/1206 ( <0.1%) | 1/2372 ( <0.1%) |
|                                                                     | Overall          | 0/1432          | 1/1452 ( <0.1%) | 1/2884 ( <0.1%) |
| Dyshidrosis                                                         | 1st year         | 1/1432 ( <0.1%) | 0/1452          | 1/2884 ( <0.1%) |
|                                                                     | Overall          | 1/1432 ( <0.1%) | 0/1452          | 1/2884 ( <0.1%) |
| Eczema                                                              | 1st year         | 4/1432 ( 0.3%)  | 4/1452 ( 0.3%)  | 8/2884 ( 0.3%)  |
|                                                                     | 2nd year         | 2/1166 ( 0.2%)  | 3/1206 ( 0.2%)  | 5/2372 ( 0.2%)  |
|                                                                     | 3rd year         | 1/ 963 ( 0.1%)  | 2/1012 ( 0.2%)  | 3/1975 ( 0.2%)  |
|                                                                     | Overall          | 6/1432 ( 0.4%)  | 8/1452 ( 0.6%)  | 14/2884 ( 0.5%) |
| Erythema                                                            | 1st year         | 1/1432 ( <0.1%) | 0/1452          | 1/2884 ( <0.1%) |
|                                                                     | 2nd year         | 1/1166 ( <0.1%) | 0/1206          | 1/2372 ( <0.1%) |
|                                                                     | Overall          | 2/1432 ( 0.1%)  | 0/1452          | 2/2884 ( <0.1%) |
| Erythema multiforme                                                 | 2nd year         | 1/1166 ( <0.1%) | 0/1206          | 1/2372 ( <0.1%) |
|                                                                     | 3rd year         | 1/ 963 ( 0.1%)  | 0/1012          | 1/1975 ( <0.1%) |
|                                                                     | Overall          | 1/1432 ( <0.1%) | 0/1452          | 1/2884 ( <0.1%) |
| Hidradenitis                                                        | 1st year         | 1/1432 ( <0.1%) | 0/1452          | 1/2884 ( <0.1%) |
|                                                                     | Overall          | 1/1432 ( <0.1%) | 0/1452          | 1/2884 ( <0.1%) |

**Table 14.3.1 / 9: Number of subjects with adverse events by primary system organ class, preferred term and year (FAS)**

| Primary system organ class<br>Preferred term<br>MedDRA version 14.0 | YEAR OF<br>ONSET | LCS12           | LCS16           | Total           |
|---------------------------------------------------------------------|------------------|-----------------|-----------------|-----------------|
| Hirsutism                                                           | 1st year         | 7/1432 ( 0.5%)  | 5/1452 ( 0.3%)  | 12/2884 ( 0.4%) |
|                                                                     | 2nd year         | 0/1166          | 6/1206 ( 0.5%)  | 6/2372 ( 0.3%)  |
|                                                                     | Overall          | 7/1432 ( 0.5%)  | 10/1452 ( 0.7%) | 17/2884 ( 0.6%) |
| Hyperhidrosis                                                       | 1st year         | 3/1432 ( 0.2%)  | 2/1452 ( 0.1%)  | 5/2884 ( 0.2%)  |
|                                                                     | Overall          | 3/1432 ( 0.2%)  | 2/1452 ( 0.1%)  | 5/2884 ( 0.2%)  |
| Hyperkeratosis                                                      | 1st year         | 1/1432 ( <0.1%) | 0/1452          | 1/2884 ( <0.1%) |
|                                                                     | Overall          | 1/1432 ( <0.1%) | 0/1452          | 1/2884 ( <0.1%) |
| Hypertrichosis                                                      | 1st year         | 2/1432 ( 0.1%)  | 0/1452          | 2/2884 ( <0.1%) |
|                                                                     | 2nd year         | 0/1166          | 1/1206 ( <0.1%) | 1/2372 ( <0.1%) |
|                                                                     | Overall          | 2/1432 ( 0.1%)  | 1/1452 ( <0.1%) | 3/2884 ( 0.1%)  |
| Idiopathic urticaria                                                | 1st year         | 1/1432 ( <0.1%) | 0/1452          | 1/2884 ( <0.1%) |
|                                                                     | Overall          | 1/1432 ( <0.1%) | 0/1452          | 1/2884 ( <0.1%) |
| Increased tendency to bruise                                        | 3rd year         | 1/ 963 ( 0.1%)  | 0/1012          | 1/1975 ( <0.1%) |
|                                                                     | Overall          | 1/1432 ( <0.1%) | 0/1452          | 1/2884 ( <0.1%) |
| Ingrown hair                                                        | 2nd year         | 1/1166 ( <0.1%) | 0/1206          | 1/2372 ( <0.1%) |
|                                                                     | Overall          | 1/1432 ( <0.1%) | 0/1452          | 1/2884 ( <0.1%) |
| Intertrigo                                                          | 2nd year         | 1/1166 ( <0.1%) | 0/1206          | 1/2372 ( <0.1%) |
|                                                                     | Overall          | 1/1432 ( <0.1%) | 0/1452          | 1/2884 ( <0.1%) |
| Lentigo                                                             | 3rd year         | 1/ 963 ( 0.1%)  | 0/1012          | 1/1975 ( <0.1%) |
|                                                                     | Overall          | 1/1432 ( <0.1%) | 0/1452          | 1/2884 ( <0.1%) |
| Lichen sclerosus                                                    | 1st year         | 0/1432          | 2/1452 ( 0.1%)  | 2/2884 ( <0.1%) |
|                                                                     | 2nd year         | 1/1166 ( <0.1%) | 0/1206          | 1/2372 ( <0.1%) |
|                                                                     | Overall          | 1/1432 ( <0.1%) | 2/1452 ( 0.1%)  | 3/2884 ( 0.1%)  |
| Neurodermatitis                                                     | 1st year         | 0/1432          | 1/1452 ( <0.1%) | 1/2884 ( <0.1%) |
|                                                                     | Overall          | 0/1432          | 1/1452 ( <0.1%) | 1/2884 ( <0.1%) |
| Night sweats                                                        | 2nd year         | 0/1166          | 1/1206 ( <0.1%) | 1/2372 ( <0.1%) |
|                                                                     | Overall          | 0/1432          | 1/1452 ( <0.1%) | 1/2884 ( <0.1%) |

**Table 14.3.1 / 9: Number of subjects with adverse events by primary system organ class, preferred term and year (FAS)**

| Primary system organ class<br>Preferred term<br>MedDRA version 14.0 | YEAR OF<br>ONSET | LCS12           | LCS16          | Total           |
|---------------------------------------------------------------------|------------------|-----------------|----------------|-----------------|
| Photosensitivity reaction                                           | 2nd year         | 0/1166          | 1/1206 (<0.1%) | 1/2372 (<0.1%)  |
|                                                                     | 3rd year         | 0/ 963          | 1/1012 (<0.1%) | 1/1975 (<0.1%)  |
|                                                                     | Overall          | 0/1432          | 1/1452 (<0.1%) | 1/2884 (<0.1%)  |
| Pityriasis rosea                                                    | 1st year         | 1/1432 (<0.1%)  | 1/1452 (<0.1%) | 2/2884 (<0.1%)  |
|                                                                     | 2nd year         | 0/1166          | 1/1206 (<0.1%) | 1/2372 (<0.1%)  |
|                                                                     | Overall          | 1/1432 (<0.1%)  | 2/1452 ( 0.1%) | 3/2884 ( 0.1%)  |
| Precancerous skin lesion                                            | 2nd year         | 0/1166          | 1/1206 (<0.1%) | 1/2372 (<0.1%)  |
|                                                                     | Overall          | 0/1432          | 1/1452 (<0.1%) | 1/2884 (<0.1%)  |
| Pruritus                                                            | 1st year         | 3/1432 ( 0.2%)  | 1/1452 (<0.1%) | 4/2884 ( 0.1%)  |
|                                                                     | 2nd year         | 0/1166          | 2/1206 ( 0.2%) | 2/2372 (<0.1%)  |
|                                                                     | 3rd year         | 1/ 963 ( 0.1%)  | 0/1012         | 1/1975 (<0.1%)  |
|                                                                     | Overall          | 4/1432 ( 0.3%)  | 3/1452 ( 0.2%) | 7/2884 ( 0.2%)  |
| Pruritus allergic                                                   | 1st year         | 0/1432          | 1/1452 (<0.1%) | 1/2884 (<0.1%)  |
|                                                                     | 2nd year         | 0/1166          | 1/1206 (<0.1%) | 1/2372 (<0.1%)  |
|                                                                     | Overall          | 0/1432          | 2/1452 ( 0.1%) | 2/2884 (<0.1%)  |
| Psoriasis                                                           | 1st year         | 0/1432          | 1/1452 (<0.1%) | 1/2884 (<0.1%)  |
|                                                                     | 2nd year         | 0/1166          | 1/1206 (<0.1%) | 1/2372 (<0.1%)  |
|                                                                     | Overall          | 0/1432          | 2/1452 ( 0.1%) | 2/2884 (<0.1%)  |
| Rash                                                                | 1st year         | 6/1432 ( 0.4%)  | 7/1452 ( 0.5%) | 13/2884 ( 0.5%) |
|                                                                     | 2nd year         | 2/1166 ( 0.2%)  | 0/1206         | 2/2372 (<0.1%)  |
|                                                                     | 3rd year         | 2/ 963 ( 0.2%)  | 1/1012 (<0.1%) | 3/1975 ( 0.2%)  |
|                                                                     | Overall          | 10/1432 ( 0.7%) | 8/1452 ( 0.6%) | 18/2884 ( 0.6%) |
| Rash macular                                                        | 3rd year         | 0/ 963          | 1/1012 (<0.1%) | 1/1975 (<0.1%)  |
|                                                                     | Overall          | 0/1432          | 1/1452 (<0.1%) | 1/2884 (<0.1%)  |
| Rash papular                                                        | 1st year         | 1/1432 (<0.1%)  | 0/1452         | 1/2884 (<0.1%)  |
|                                                                     | 2nd year         | 1/1166 (<0.1%)  | 1/1206 (<0.1%) | 2/2372 (<0.1%)  |
|                                                                     | Overall          | 2/1432 ( 0.1%)  | 1/1452 (<0.1%) | 3/2884 ( 0.1%)  |
| Rosacea                                                             | 1st year         | 0/1432          | 2/1452 ( 0.1%) | 2/2884 (<0.1%)  |
|                                                                     | 2nd year         | 1/1166 (<0.1%)  | 0/1206         | 1/2372 (<0.1%)  |
|                                                                     | Overall          | 1/1432 (<0.1%)  | 2/1452 ( 0.1%) | 3/2884 ( 0.1%)  |

**Table 14.3.1 / 9: Number of subjects with adverse events by primary system organ class, preferred term and year (FAS)**

| Primary system organ class<br>Preferred term<br>MedDRA version 14.0 | YEAR OF<br>ONSET | LCS12           | LCS16           | Total           |
|---------------------------------------------------------------------|------------------|-----------------|-----------------|-----------------|
| Scar                                                                | 2nd year         | 0/1166          | 1/1206 ( <0.1%) | 1/2372 ( <0.1%) |
|                                                                     | Overall          | 0/1432          | 1/1452 ( <0.1%) | 1/2884 ( <0.1%) |
| Seborrhoea                                                          | 1st year         | 6/1432 ( 0.4%)  | 8/1452 ( 0.6%)  | 14/2884 ( 0.5%) |
|                                                                     | 2nd year         | 0/1166          | 4/1206 ( 0.3%)  | 4/2372 ( 0.2%)  |
|                                                                     | Overall          | 7/1432 ( 0.5%)  | 10/1452 ( 0.7%) | 17/2884 ( 0.6%) |
| Skin dystrophy                                                      | 1st year         | 1/1432 ( <0.1%) | 0/1452          | 1/2884 ( <0.1%) |
|                                                                     | Overall          | 1/1432 ( <0.1%) | 0/1452          | 1/2884 ( <0.1%) |
| Skin fissures                                                       | 1st year         | 0/1432          | 1/1452 ( <0.1%) | 1/2884 ( <0.1%) |
|                                                                     | 2nd year         | 0/1166          | 1/1206 ( <0.1%) | 1/2372 ( <0.1%) |
|                                                                     | Overall          | 0/1432          | 2/1452 ( 0.1%)  | 2/2884 ( <0.1%) |
| Skin hypopigmentation                                               | 3rd year         | 0/ 963          | 1/1012 ( <0.1%) | 1/1975 ( <0.1%) |
|                                                                     | Overall          | 0/1432          | 1/1452 ( <0.1%) | 1/2884 ( <0.1%) |
| Skin irritation                                                     | 1st year         | 1/1432 ( <0.1%) | 2/1452 ( 0.1%)  | 3/2884 ( 0.1%)  |
|                                                                     | Overall          | 1/1432 ( <0.1%) | 2/1452 ( 0.1%)  | 3/2884 ( 0.1%)  |
| Skin lesion                                                         | 3rd year         | 0/ 963          | 1/1012 ( <0.1%) | 1/1975 ( <0.1%) |
|                                                                     | Overall          | 0/1432          | 1/1452 ( <0.1%) | 1/2884 ( <0.1%) |
| Skin odour abnormal                                                 | 2nd year         | 0/1166          | 1/1206 ( <0.1%) | 1/2372 ( <0.1%) |
|                                                                     | Overall          | 0/1432          | 1/1452 ( <0.1%) | 1/2884 ( <0.1%) |
| Skin reaction                                                       | 1st year         | 2/1432 ( 0.1%)  | 0/1452          | 2/2884 ( <0.1%) |
|                                                                     | Overall          | 2/1432 ( 0.1%)  | 0/1452          | 2/2884 ( <0.1%) |
| Urticaria                                                           | 1st year         | 7/1432 ( 0.5%)  | 5/1452 ( 0.3%)  | 12/2884 ( 0.4%) |
|                                                                     | 2nd year         | 2/1166 ( 0.2%)  | 2/1206 ( 0.2%)  | 4/2372 ( 0.2%)  |
|                                                                     | 3rd year         | 3/ 963 ( 0.3%)  | 3/1012 ( 0.3%)  | 6/1975 ( 0.3%)  |
|                                                                     | Overall          | 11/1432 ( 0.8%) | 10/1452 ( 0.7%) | 21/2884 ( 0.7%) |
| Vitiligo                                                            | 3rd year         | 0/ 963          | 1/1012 ( <0.1%) | 1/1975 ( <0.1%) |
|                                                                     | Overall          | 0/1432          | 1/1452 ( <0.1%) | 1/2884 ( <0.1%) |
| Social circumstances                                                | 1st year         | 1/1432 ( <0.1%) | 1/1452 ( <0.1%) | 2/2884 ( <0.1%) |
|                                                                     | Overall          | 1/1432 ( <0.1%) | 1/1452 ( <0.1%) | 2/2884 ( <0.1%) |

**Table 14.3.1 / 9: Number of subjects with adverse events by primary system organ class, preferred term and year (FAS)**

| Primary system organ class<br>Preferred term<br>MedDRA version 14.0 | YEAR OF<br>ONSET | LCS12           | LCS16           | Total           |
|---------------------------------------------------------------------|------------------|-----------------|-----------------|-----------------|
| Exposure to communicable disease                                    | 1st year         | 1/1432 ( <0.1%) | 0/1452          | 1/2884 ( <0.1%) |
|                                                                     | Overall          | 1/1432 ( <0.1%) | 0/1452          | 1/2884 ( <0.1%) |
| Hearing disability                                                  | 1st year         | 0/1432          | 1/1452 ( <0.1%) | 1/2884 ( <0.1%) |
|                                                                     | Overall          | 0/1432          | 1/1452 ( <0.1%) | 1/2884 ( <0.1%) |
| Surgical and medical procedures                                     | 1st year         | 17/1432 ( 1.2%) | 22/1452 ( 1.5%) | 39/2884 ( 1.4%) |
|                                                                     | 2nd year         | 14/1166 ( 1.2%) | 18/1206 ( 1.5%) | 32/2372 ( 1.3%) |
|                                                                     | 3rd year         | 10/ 963 ( 1.0%) | 8/1012 ( 0.8%)  | 18/1975 ( 0.9%) |
|                                                                     | Overall          | 40/1432 ( 2.8%) | 45/1452 ( 3.1%) | 85/2884 ( 2.9%) |
| Abdominoplasty                                                      | 1st year         | 2/1432 ( 0.1%)  | 1/1452 ( <0.1%) | 3/2884 ( 0.1%)  |
|                                                                     | 2nd year         | 1/1166 ( <0.1%) | 0/1206          | 1/2372 ( <0.1%) |
|                                                                     | 3rd year         | 1/ 963 ( 0.1%)  | 0/1012          | 1/1975 ( <0.1%) |
|                                                                     | Overall          | 4/1432 ( 0.3%)  | 1/1452 ( <0.1%) | 5/2884 ( 0.2%)  |
| Anal fissure excision                                               | 2nd year         | 1/1166 ( <0.1%) | 0/1206          | 1/2372 ( <0.1%) |
|                                                                     | Overall          | 1/1432 ( <0.1%) | 0/1452          | 1/2884 ( <0.1%) |
| Anal sphincterotomy                                                 | 2nd year         | 0/1166          | 1/1206 ( <0.1%) | 1/2372 ( <0.1%) |
|                                                                     | Overall          | 0/1432          | 1/1452 ( <0.1%) | 1/2884 ( <0.1%) |
| Apicectomy                                                          | 1st year         | 0/1432          | 1/1452 ( <0.1%) | 1/2884 ( <0.1%) |
|                                                                     | 2nd year         | 0/1166          | 1/1206 ( <0.1%) | 1/2372 ( <0.1%) |
|                                                                     | Overall          | 0/1432          | 1/1452 ( <0.1%) | 1/2884 ( <0.1%) |
| Breast prosthesis implantation                                      | 1st year         | 2/1432 ( 0.1%)  | 0/1452          | 2/2884 ( <0.1%) |
|                                                                     | 2nd year         | 1/1166 ( <0.1%) | 0/1206          | 1/2372 ( <0.1%) |
|                                                                     | 3rd year         | 0/ 963          | 1/1012 ( <0.1%) | 1/1975 ( <0.1%) |
|                                                                     | Overall          | 3/1432 ( 0.2%)  | 1/1452 ( <0.1%) | 4/2884 ( 0.1%)  |
| Bunion operation                                                    | 1st year         | 1/1432 ( <0.1%) | 0/1452          | 1/2884 ( <0.1%) |
|                                                                     | 2nd year         | 1/1166 ( <0.1%) | 0/1206          | 1/2372 ( <0.1%) |
|                                                                     | 3rd year         | 0/ 963          | 1/1012 ( <0.1%) | 1/1975 ( <0.1%) |
|                                                                     | Overall          | 2/1432 ( 0.1%)  | 1/1452 ( <0.1%) | 3/2884 ( 0.1%)  |
| Cervix cautery                                                      | 1st year         | 0/1432          | 1/1452 ( <0.1%) | 1/2884 ( <0.1%) |
|                                                                     | Overall          | 0/1432          | 1/1452 ( <0.1%) | 1/2884 ( <0.1%) |

**Table 14.3.1 / 9: Number of subjects with adverse events by primary system organ class, preferred term and year (FAS)**

| Primary system organ class<br>Preferred term<br>MedDRA version 14.0 | YEAR OF<br>ONSET | LCS12           | LCS16           | Total           |
|---------------------------------------------------------------------|------------------|-----------------|-----------------|-----------------|
| Cholecystectomy                                                     | 2nd year         | 1/1166 ( <0.1%) | 0/1206          | 1/2372 ( <0.1%) |
|                                                                     | Overall          | 1/1432 ( <0.1%) | 0/1452          | 1/2884 ( <0.1%) |
| Dental cosmetic procedure                                           | 3rd year         | 1/ 963 ( 0.1%)  | 0/1012          | 1/1975 ( <0.1%) |
|                                                                     | Overall          | 1/1432 ( <0.1%) | 0/1452          | 1/2884 ( <0.1%) |
| Dental operation                                                    | 1st year         | 0/1432          | 3/1452 ( 0.2%)  | 3/2884 ( 0.1%)  |
|                                                                     | 2nd year         | 1/1166 ( <0.1%) | 0/1206          | 1/2372 ( <0.1%) |
|                                                                     | Overall          | 1/1432 ( <0.1%) | 3/1452 ( 0.2%)  | 4/2884 ( 0.1%)  |
| Detoxification                                                      | 2nd year         | 0/1166          | 1/1206 ( <0.1%) | 1/2372 ( <0.1%) |
|                                                                     | 3rd year         | 1/ 963 ( 0.1%)  | 0/1012          | 1/1975 ( <0.1%) |
|                                                                     | Overall          | 1/1432 ( <0.1%) | 1/1452 ( <0.1%) | 2/2884 ( <0.1%) |
| Endodontic procedure                                                | 1st year         | 0/1432          | 1/1452 ( <0.1%) | 1/2884 ( <0.1%) |
|                                                                     | 2nd year         | 0/1166          | 1/1206 ( <0.1%) | 1/2372 ( <0.1%) |
|                                                                     | Overall          | 0/1432          | 2/1452 ( 0.1%)  | 2/2884 ( <0.1%) |
| Eye laser surgery                                                   | 2nd year         | 0/1166          | 1/1206 ( <0.1%) | 1/2372 ( <0.1%) |
|                                                                     | Overall          | 0/1432          | 1/1452 ( <0.1%) | 1/2884 ( <0.1%) |
| Gallbladder operation                                               | 1st year         | 0/1432          | 1/1452 ( <0.1%) | 1/2884 ( <0.1%) |
|                                                                     | Overall          | 0/1432          | 1/1452 ( <0.1%) | 1/2884 ( <0.1%) |
| Gastric banding                                                     | 1st year         | 1/1432 ( <0.1%) | 0/1452          | 1/2884 ( <0.1%) |
|                                                                     | Overall          | 1/1432 ( <0.1%) | 0/1452          | 1/2884 ( <0.1%) |
| Gastric bypass                                                      | 2nd year         | 0/1166          | 1/1206 ( <0.1%) | 1/2372 ( <0.1%) |
|                                                                     | Overall          | 0/1432          | 1/1452 ( <0.1%) | 1/2884 ( <0.1%) |
| Haemorrhoid operation                                               | 2nd year         | 0/1166          | 1/1206 ( <0.1%) | 1/2372 ( <0.1%) |
|                                                                     | Overall          | 0/1432          | 1/1452 ( <0.1%) | 1/2884 ( <0.1%) |
| Keratomileusis                                                      | 3rd year         | 0/ 963          | 1/1012 ( <0.1%) | 1/1975 ( <0.1%) |
|                                                                     | Overall          | 0/1432          | 1/1452 ( <0.1%) | 1/2884 ( <0.1%) |
| Ligament operation                                                  | 3rd year         | 1/ 963 ( 0.1%)  | 0/1012          | 1/1975 ( <0.1%) |
|                                                                     | Overall          | 1/1432 ( <0.1%) | 0/1452          | 1/2884 ( <0.1%) |

**Table 14.3.1 / 9: Number of subjects with adverse events by primary system organ class, preferred term and year (FAS)**

| Primary system organ class<br>Preferred term<br>MedDRA version 14.0 | YEAR OF<br>ONSET | LCS12           | LCS16           | Total           |
|---------------------------------------------------------------------|------------------|-----------------|-----------------|-----------------|
| Lipoma excision                                                     | 2nd year         | 1/1166 ( <0.1%) | 0/1206          | 1/2372 ( <0.1%) |
|                                                                     | Overall          | 1/1432 ( <0.1%) | 0/1452          | 1/2884 ( <0.1%) |
| Mammoplasty                                                         | 1st year         | 2/1432 ( 0.1%)  | 0/1452          | 2/2884 ( <0.1%) |
|                                                                     | 2nd year         | 2/1166 ( 0.2%)  | 0/1206          | 2/2372 ( <0.1%) |
|                                                                     | 3rd year         | 3/ 963 ( 0.3%)  | 3/1012 ( 0.3%)  | 6/1975 ( 0.3%)  |
|                                                                     | Overall          | 6/1432 ( 0.4%)  | 3/1452 ( 0.2%)  | 9/2884 ( 0.3%)  |
| Maxillary antrum operation                                          | 1st year         | 1/1432 ( <0.1%) | 0/1452          | 1/2884 ( <0.1%) |
|                                                                     | Overall          | 1/1432 ( <0.1%) | 0/1452          | 1/2884 ( <0.1%) |
| Meniscus operation                                                  | 2nd year         | 0/1166          | 1/1206 ( <0.1%) | 1/2372 ( <0.1%) |
|                                                                     | Overall          | 0/1432          | 1/1452 ( <0.1%) | 1/2884 ( <0.1%) |
| Mole excision                                                       | 1st year         | 2/1432 ( 0.1%)  | 1/1452 ( <0.1%) | 3/2884 ( 0.1%)  |
|                                                                     | 2nd year         | 0/1166          | 1/1206 ( <0.1%) | 1/2372 ( <0.1%) |
|                                                                     | Overall          | 2/1432 ( 0.1%)  | 2/1452 ( 0.1%)  | 4/2884 ( 0.1%)  |
| Nasal polypectomy                                                   | 1st year         | 0/1432          | 1/1452 ( <0.1%) | 1/2884 ( <0.1%) |
|                                                                     | Overall          | 0/1432          | 1/1452 ( <0.1%) | 1/2884 ( <0.1%) |
| Parasitic infection prophylaxis                                     | 1st year         | 0/1432          | 1/1452 ( <0.1%) | 1/2884 ( <0.1%) |
|                                                                     | Overall          | 0/1432          | 1/1452 ( <0.1%) | 1/2884 ( <0.1%) |
| Plastic surgery                                                     | 1st year         | 0/1432          | 1/1452 ( <0.1%) | 1/2884 ( <0.1%) |
|                                                                     | Overall          | 0/1432          | 1/1452 ( <0.1%) | 1/2884 ( <0.1%) |
| Postoperative analgesia                                             | 2nd year         | 1/1166 ( <0.1%) | 0/1206          | 1/2372 ( <0.1%) |
|                                                                     | Overall          | 1/1432 ( <0.1%) | 0/1452          | 1/2884 ( <0.1%) |
| Rotator cuff repair                                                 | 1st year         | 0/1432          | 1/1452 ( <0.1%) | 1/2884 ( <0.1%) |
|                                                                     | 2nd year         | 0/1166          | 1/1206 ( <0.1%) | 1/2372 ( <0.1%) |
|                                                                     | Overall          | 0/1432          | 2/1452 ( 0.1%)  | 2/2884 ( <0.1%) |
| Scar excision                                                       | 2nd year         | 0/1166          | 1/1206 ( <0.1%) | 1/2372 ( <0.1%) |
|                                                                     | Overall          | 0/1432          | 1/1452 ( <0.1%) | 1/2884 ( <0.1%) |
| Skin neoplasm excision                                              | 2nd year         | 0/1166          | 1/1206 ( <0.1%) | 1/2372 ( <0.1%) |
|                                                                     | Overall          | 0/1432          | 1/1452 ( <0.1%) | 1/2884 ( <0.1%) |

**Table 14.3.1 / 9: Number of subjects with adverse events by primary system organ class, preferred term and year (FAS)**

| Primary system organ class<br>Preferred term<br>MedDRA version 14.0 | YEAR OF<br>ONSET | LCS             |                 | Total           |
|---------------------------------------------------------------------|------------------|-----------------|-----------------|-----------------|
|                                                                     |                  | LCS12           | LCS16           |                 |
| Tenolysis                                                           | 3rd year         | 0/ 963          | 1/1012 ( <0.1%) | 1/1975 ( <0.1%) |
|                                                                     | Overall          | 0/1432          | 1/1452 ( <0.1%) | 1/2884 ( <0.1%) |
| Tonsillectomy                                                       | 1st year         | 0/1432          | 1/1452 ( <0.1%) | 1/2884 ( <0.1%) |
|                                                                     | 2nd year         | 1/1166 ( <0.1%) | 1/1206 ( <0.1%) | 2/2372 ( <0.1%) |
|                                                                     | Overall          | 1/1432 ( <0.1%) | 2/1452 ( 0.1%)  | 3/2884 ( 0.1%)  |
| Tooth extraction                                                    | 1st year         | 1/1432 ( <0.1%) | 5/1452 ( 0.3%)  | 6/2884 ( 0.2%)  |
|                                                                     | 2nd year         | 2/1166 ( 0.2%)  | 3/1206 ( 0.2%)  | 5/2372 ( 0.2%)  |
|                                                                     | 3rd year         | 3/ 963 ( 0.3%)  | 1/1012 ( <0.1%) | 4/1975 ( 0.2%)  |
|                                                                     | Overall          | 6/1432 ( 0.4%)  | 9/1452 ( 0.6%)  | 15/2884 ( 0.5%) |
| Umbilical hernia repair                                             | 1st year         | 0/1432          | 1/1452 ( <0.1%) | 1/2884 ( <0.1%) |
|                                                                     | Overall          | 0/1432          | 1/1452 ( <0.1%) | 1/2884 ( <0.1%) |
| Varicose vein operation                                             | 3rd year         | 1/ 963 ( 0.1%)  | 0/1012          | 1/1975 ( <0.1%) |
|                                                                     | Overall          | 1/1432 ( <0.1%) | 0/1452          | 1/2884 ( <0.1%) |
| Wisdom teeth removal                                                | 1st year         | 6/1432 ( 0.4%)  | 3/1452 ( 0.2%)  | 9/2884 ( 0.3%)  |
|                                                                     | 2nd year         | 1/1166 ( <0.1%) | 3/1206 ( 0.2%)  | 4/2372 ( 0.2%)  |
|                                                                     | Overall          | 7/1432 ( 0.5%)  | 5/1452 ( 0.3%)  | 12/2884 ( 0.4%) |
| Wrist surgery                                                       | 1st year         | 0/1432          | 1/1452 ( <0.1%) | 1/2884 ( <0.1%) |
|                                                                     | Overall          | 0/1432          | 1/1452 ( <0.1%) | 1/2884 ( <0.1%) |
| Vascular disorders                                                  | 1st year         | 14/1432 ( 1.0%) | 11/1452 ( 0.8%) | 25/2884 ( 0.9%) |
|                                                                     | 2nd year         | 4/1166 ( 0.3%)  | 11/1206 ( 0.9%) | 15/2372 ( 0.6%) |
|                                                                     | 3rd year         | 4/ 963 ( 0.4%)  | 6/1012 ( 0.6%)  | 10/1975 ( 0.5%) |
|                                                                     | Overall          | 20/1432 ( 1.4%) | 26/1452 ( 1.8%) | 46/2884 ( 1.6%) |
| Deep vein thrombosis                                                | 1st year         | 1/1432 ( <0.1%) | 0/1452          | 1/2884 ( <0.1%) |
|                                                                     | Overall          | 1/1432 ( <0.1%) | 0/1452          | 1/2884 ( <0.1%) |
| Hot flush                                                           | 1st year         | 4/1432 ( 0.3%)  | 1/1452 ( <0.1%) | 5/2884 ( 0.2%)  |
|                                                                     | 2nd year         | 0/1166          | 1/1206 ( <0.1%) | 1/2372 ( <0.1%) |
|                                                                     | 3rd year         | 0/ 963          | 2/1012 ( 0.2%)  | 2/1975 ( 0.1%)  |
|                                                                     | Overall          | 4/1432 ( 0.3%)  | 3/1452 ( 0.2%)  | 7/2884 ( 0.2%)  |



**Table 14.3.1 / 9: Number of subjects with adverse events by primary system organ class, preferred term and year (FAS)**

| Primary system organ class<br>Preferred term<br>MedDRA version 14.0 | YEAR OF<br>ONSET | LCS12           | LCS16           | Total           |
|---------------------------------------------------------------------|------------------|-----------------|-----------------|-----------------|
| Hypertension                                                        | 1st year         | 6/1432 ( 0.4%)  | 6/1452 ( 0.4%)  | 12/2884 ( 0.4%) |
|                                                                     | 2nd year         | 3/1166 ( 0.3%)  | 7/1206 ( 0.6%)  | 10/2372 ( 0.4%) |
|                                                                     | 3rd year         | 3/ 963 ( 0.3%)  | 3/1012 ( 0.3%)  | 6/1975 ( 0.3%)  |
|                                                                     | Overall          | 11/1432 ( 0.8%) | 16/1452 ( 1.1%) | 27/2884 ( 0.9%) |
| Hypotension                                                         | 1st year         | 1/1432 (<0.1%)  | 2/1452 ( 0.1%)  | 3/2884 ( 0.1%)  |
|                                                                     | Overall          | 1/1432 (<0.1%)  | 2/1452 ( 0.1%)  | 3/2884 ( 0.1%)  |
| Neurogenic shock                                                    | 1st year         | 2/1432 ( 0.1%)  | 0/1452          | 2/2884 (<0.1%)  |
|                                                                     | Overall          | 2/1432 ( 0.1%)  | 0/1452          | 2/2884 (<0.1%)  |
| Phlebitis                                                           | 2nd year         | 0/1166          | 1/1206 (<0.1%)  | 1/2372 (<0.1%)  |
|                                                                     | Overall          | 0/1432          | 1/1452 (<0.1%)  | 1/2884 (<0.1%)  |
| Thrombophlebitis superficial                                        | 2nd year         | 1/1166 (<0.1%)  | 0/1206          | 1/2372 (<0.1%)  |
|                                                                     | Overall          | 1/1432 (<0.1%)  | 0/1452          | 1/2884 (<0.1%)  |
| Varicose vein                                                       | 1st year         | 0/1432          | 2/1452 ( 0.1%)  | 2/2884 (<0.1%)  |
|                                                                     | 2nd year         | 0/1166          | 3/1206 ( 0.2%)  | 3/2372 ( 0.1%)  |
|                                                                     | 3rd year         | 1/ 963 ( 0.1%)  | 1/1012 (<0.1%)  | 2/1975 ( 0.1%)  |
|                                                                     | Overall          | 1/1432 (<0.1%)  | 5/1452 ( 0.3%)  | 6/2884 ( 0.2%)  |
| Vein pain                                                           | 2nd year         | 0/1166          | 1/1206 (<0.1%)  | 1/2372 (<0.1%)  |
|                                                                     | Overall          | 0/1432          | 1/1452 (<0.1%)  | 1/2884 (<0.1%)  |

Note: A subject is counted only once within each preferred term of any primary SOC.

Note: Denominator is number of subjects available at the START of the year or all subjects for overall

Note: Adverse events are sorted in alphabetical order by primary SOC and preferred term.

Global Biostatistics: /by-sasp/patdb/projects/de04209/310442/stat/prod\_interim03/pgms/t-ae-cat.sas epkl 12OCT2011 11:21

End of table

**Table 14.3.1 / 10: Number of subjects with adverse events including subject identifier and year by treatment (FAS)**

TREATMENT: LCS12

| Primary system organ class<br>Preferred term<br>MedDRA version 14.0 | YEAR OF<br>ONSET | N (%)              | subject identifier                                     |
|---------------------------------------------------------------------|------------------|--------------------|--------------------------------------------------------|
| Number of subjects (%) with at least one adverse event              | 1st year         | 1035/1432 ( 72.3%) |                                                        |
|                                                                     | 2nd year         | 603/1166 ( 51.7%)  |                                                        |
|                                                                     | 3rd year         | 466/ 963 ( 48.4%)  |                                                        |
|                                                                     | Overall          | 1194/1432 ( 83.4%) |                                                        |
| Blood and lymphatic system disorders                                | 1st year         | 10/1432 ( 0.7%)    |                                                        |
|                                                                     | 2nd year         | 3/1166 ( 0.3%)     |                                                        |
|                                                                     | 3rd year         | 3/ 963 ( 0.3%)     |                                                        |
|                                                                     | Overall          | 16/1432 ( 1.1%)    |                                                        |
| Anaemia                                                             | 1st year         | 5/1432 ( 0.3%)     | 120417, 161210, 241410, 244125, 246211                 |
|                                                                     | 2nd year         | 1/1166 ( <0.1%)    | 244430                                                 |
|                                                                     | 3rd year         | 1/ 963 ( 0.1%)     | 150142                                                 |
|                                                                     | Overall          | 7/1432 ( 0.5%)     | 120417, 150142, 161210, 241410, 244125, 244430, 246211 |
| Iron deficiency anaemia                                             | 3rd year         | 1/ 963 ( 0.1%)     | 245431                                                 |
|                                                                     | Overall          | 1/1432 ( <0.1%)    | 245431                                                 |
| Leukocytosis                                                        | 1st year         | 1/1432 ( <0.1%)    | 241410                                                 |
|                                                                     | Overall          | 1/1432 ( <0.1%)    | 241410                                                 |
| Lymphadenitis                                                       | 1st year         | 2/1432 ( 0.1%)     | 160701, 244117                                         |
|                                                                     | 2nd year         | 1/1166 ( <0.1%)    | 180630                                                 |
|                                                                     | Overall          | 3/1432 ( 0.2%)     | 160701, 180630, 244117                                 |
| Lymphadenopathy                                                     | 1st year         | 1/1432 ( <0.1%)    | 140105                                                 |
|                                                                     | 2nd year         | 1/1166 ( <0.1%)    | 242812                                                 |
|                                                                     | 3rd year         | 1/ 963 ( 0.1%)     | 210124                                                 |
|                                                                     | Overall          | 3/1432 ( 0.2%)     | 140105, 210124, 242812                                 |
| Spherocytic anaemia                                                 | 1st year         | 1/1432 ( <0.1%)    | 243938                                                 |
|                                                                     | Overall          | 1/1432 ( <0.1%)    | 243938                                                 |
| Splenic cyst                                                        | 1st year         | 1/1432 ( <0.1%)    | 120104                                                 |
|                                                                     | Overall          | 1/1432 ( <0.1%)    | 120104                                                 |

**Table 14.3.1 / 10: Number of subjects with adverse events including subject identifier and year by treatment (FAS)**

TREATMENT: LCS12

| Primary system organ class                 | YEAR OF ONSET | N (%)           | subject identifier             |
|--------------------------------------------|---------------|-----------------|--------------------------------|
| Preferred term                             |               |                 |                                |
| MedDRA version 14.0                        |               |                 |                                |
| Splenomegaly                               | 1st year      | 1/1432 ( <0.1%) | 243938                         |
|                                            | Overall       | 1/1432 ( <0.1%) | 243938                         |
| Cardiac disorders                          | 1st year      | 2/1432 ( 0.1%)  |                                |
|                                            | 2nd year      | 4/1166 ( 0.3%)  |                                |
|                                            | 3rd year      | 3/ 963 ( 0.3%)  |                                |
|                                            | Overall       | 9/1432 ( 0.6%)  |                                |
| Arrhythmia                                 | 1st year      | 1/1432 ( <0.1%) | 160551                         |
|                                            | Overall       | 1/1432 ( <0.1%) | 160551                         |
| Palpitations                               | 2nd year      | 1/1166 ( <0.1%) | 160541                         |
|                                            | 3rd year      | 3/ 963 ( 0.3%)  | 161440, 161517, 244310         |
|                                            | Overall       | 4/1432 ( 0.3%)  | 160541, 161440, 161517, 244310 |
| Tachycardia                                | 1st year      | 1/1432 ( <0.1%) | 160401                         |
|                                            | 2nd year      | 3/1166 ( 0.3%)  | 180620, 180686, 230401         |
|                                            | Overall       | 4/1432 ( 0.3%)  | 160401, 180620, 180686, 230401 |
| Congenital, familial and genetic disorders | 2nd year      | 3/1166 ( 0.3%)  |                                |
|                                            | Overall       | 3/1432 ( 0.2%)  |                                |
| Congenital hydronephrosis                  | 2nd year      | 1/1166 ( <0.1%) | 190126                         |
|                                            | Overall       | 1/1432 ( <0.1%) | 190126                         |
| Dermoid cyst                               | 2nd year      | 1/1166 ( <0.1%) | 244407                         |
|                                            | Overall       | 1/1432 ( <0.1%) | 244407                         |
| Urethral intrinsic sphincter deficiency    | 2nd year      | 1/1166 ( <0.1%) | 246220                         |
|                                            | Overall       | 1/1432 ( <0.1%) | 246220                         |
| Ear and labyrinth disorders                | 1st year      | 9/1432 ( 0.6%)  |                                |
|                                            | 2nd year      | 5/1166 ( 0.4%)  |                                |
|                                            | 3rd year      | 3/ 963 ( 0.3%)  |                                |
|                                            | Overall       | 16/1432 ( 1.1%) |                                |
| Deafness bilateral                         | 2nd year      | 1/1166 ( <0.1%) | 242806                         |
|                                            | Overall       | 1/1432 ( <0.1%) | 242806                         |

**Table 14.3.1 / 10: Number of subjects with adverse events including subject identifier and year by treatment (FAS)**

TREATMENT: LCS12

Primary system organ class

| Preferred term<br>MedDRA version 14.0 | YEAR OF<br>ONSET | N (%)           | subject identifier             |
|---------------------------------------|------------------|-----------------|--------------------------------|
| Ear pruritus                          | 1st year         | 1/1432 ( <0.1%) | 140802                         |
|                                       | Overall          | 1/1432 ( <0.1%) | 140802                         |
| Motion sickness                       | 1st year         | 3/1432 ( 0.2%)  | 160415, 161316, 190135         |
|                                       | 3rd year         | 1/ 963 ( 0.1%)  | 243913                         |
|                                       | Overall          | 4/1432 ( 0.3%)  | 160415, 161316, 190135, 243913 |
| Otorrhoea                             | 3rd year         | 1/ 963 ( 0.1%)  | 241406                         |
|                                       | Overall          | 1/1432 ( <0.1%) | 241406                         |
| Sudden hearing loss                   | 3rd year         | 1/ 963 ( 0.1%)  | 230205                         |
|                                       | Overall          | 1/1432 ( <0.1%) | 230205                         |
| Tinnitus                              | 2nd year         | 2/1166 ( 0.2%)  | 120632, 161117                 |
|                                       | Overall          | 2/1432 ( 0.1%)  | 120632, 161117                 |
| Tympanic membrane perforation         | 1st year         | 1/1432 ( <0.1%) | 243327                         |
|                                       | 2nd year         | 1/1166 ( <0.1%) | 200923                         |
|                                       | Overall          | 2/1432 ( 0.1%)  | 200923, 243327                 |
| Vertigo                               | 1st year         | 3/1432 ( 0.2%)  | 150110, 180624, 241193         |
|                                       | 2nd year         | 1/1166 ( <0.1%) | 242806                         |
|                                       | Overall          | 4/1432 ( 0.3%)  | 150110, 180624, 241193, 242806 |
| Vertigo labyrinthine                  | 1st year         | 1/1432 ( <0.1%) | 150110                         |
|                                       | Overall          | 1/1432 ( <0.1%) | 150110                         |
| Vertigo positional                    | 1st year         | 1/1432 ( <0.1%) | 160803                         |
|                                       | 2nd year         | 1/1166 ( <0.1%) | 140802                         |
|                                       | Overall          | 2/1432 ( 0.1%)  | 140802, 160803                 |
| Endocrine disorders                   | 1st year         | 3/1432 ( 0.2%)  |                                |
|                                       | 2nd year         | 5/1166 ( 0.4%)  |                                |
|                                       | 3rd year         | 2/ 963 ( 0.2%)  |                                |
|                                       | Overall          | 10/1432 ( 0.7%) |                                |
| Goitre                                | 2nd year         | 1/1166 ( <0.1%) | 241172                         |
|                                       | 3rd year         | 1/ 963 ( 0.1%)  | 141419                         |
|                                       | Overall          | 2/1432 ( 0.1%)  | 141419, 241172                 |

**Table 14.3.1 / 10: Number of subjects with adverse events including subject identifier and year by treatment (FAS)**

TREATMENT: LCS12

Primary system organ class

| Preferred term<br>MedDRA version 14.0 | YEAR OF<br>ONSET | N (%)           | subject identifier                                                                                                     |
|---------------------------------------|------------------|-----------------|------------------------------------------------------------------------------------------------------------------------|
| Hypothyroidism                        | 1st year         | 2/1432 ( 0.1%)  | 120403, 240352                                                                                                         |
|                                       | 2nd year         | 4/1166 ( 0.3%)  | 120305, 231005, 241536, 242807                                                                                         |
|                                       | 3rd year         | 1/ 963 ( 0.1%)  | 240828                                                                                                                 |
|                                       | Overall          | 7/1432 ( 0.5%)  | 120305, 120403, 231005, 240352, 240828, 241536, 242807                                                                 |
| Thyroiditis                           | 1st year         | 1/1432 ( <0.1%) | 141403                                                                                                                 |
|                                       | Overall          | 1/1432 ( <0.1%) | 141403                                                                                                                 |
| Eye disorders                         | 1st year         | 14/1432 ( 1.0%) |                                                                                                                        |
|                                       | 2nd year         | 4/1166 ( 0.3%)  |                                                                                                                        |
|                                       | 3rd year         | 7/ 963 ( 0.7%)  |                                                                                                                        |
|                                       | Overall          | 25/1432 ( 1.7%) |                                                                                                                        |
| Blepharitis                           | 2nd year         | 1/1166 ( <0.1%) | 200601                                                                                                                 |
|                                       | Overall          | 1/1432 ( <0.1%) | 200601                                                                                                                 |
| Conjunctivitis                        | 1st year         | 11/1432 ( 0.8%) | 140224, 160118, 160321, 160749, 160801, 161109, 161218, 161406, 200506, 240644, 244412                                 |
|                                       | 2nd year         | 2/1166 ( 0.2%)  | 120329, 150142                                                                                                         |
|                                       | 3rd year         | 2/ 963 ( 0.2%)  | 160631, 161313                                                                                                         |
|                                       | Overall          | 15/1432 ( 1.0%) | 120329, 140224, 150142, 160118, 160321, 160631, 160749, 160801, 161109, 161218, 161313, 161406, 200506, 240644, 244412 |
| Conjunctivitis allergic               | 3rd year         | 2/ 963 ( 0.2%)  | 230308, 230603                                                                                                         |
|                                       | Overall          | 2/1432 ( 0.1%)  | 230308, 230603                                                                                                         |
| Dry eye                               | 1st year         | 2/1432 ( 0.1%)  | 161122, 161403                                                                                                         |
|                                       | Overall          | 2/1432 ( 0.1%)  | 161122, 161403                                                                                                         |
| Heterophoria                          | 2nd year         | 1/1166 ( <0.1%) | 230613                                                                                                                 |
|                                       | Overall          | 1/1432 ( <0.1%) | 230613                                                                                                                 |
| Iridocyclitis                         | 1st year         | 1/1432 ( <0.1%) | 180501                                                                                                                 |
|                                       | Overall          | 1/1432 ( <0.1%) | 180501                                                                                                                 |
| Meibomianitis                         | 1st year         | 1/1432 ( <0.1%) | 160321                                                                                                                 |
|                                       | Overall          | 1/1432 ( <0.1%) | 160321                                                                                                                 |

**Table 14.3.1 / 10: Number of subjects with adverse events including subject identifier and year by treatment (FAS)**

| TREATMENT: LCS12           |               |                   |                                                                                                                                                                        |
|----------------------------|---------------|-------------------|------------------------------------------------------------------------------------------------------------------------------------------------------------------------|
| Primary system organ class |               |                   |                                                                                                                                                                        |
| Preferred term             | YEAR OF ONSET | N (%)             | subject identifier                                                                                                                                                     |
| MedDRA version 14.0        |               |                   |                                                                                                                                                                        |
| Panophthalmitis            | 3rd year      | 1/ 963 ( 0.1%)    | 160984                                                                                                                                                                 |
|                            | Overall       | 1/1432 ( <0.1%)   | 160984                                                                                                                                                                 |
| Scotoma                    | 3rd year      | 1/ 963 ( 0.1%)    | 140105                                                                                                                                                                 |
|                            | Overall       | 1/1432 ( <0.1%)   | 140105                                                                                                                                                                 |
| Vision blurred             | 3rd year      | 1/ 963 ( 0.1%)    | 244430                                                                                                                                                                 |
|                            | Overall       | 1/1432 ( <0.1%)   | 244430                                                                                                                                                                 |
| Gastrointestinal disorders | 1st year      | 236/1432 ( 16.5%) |                                                                                                                                                                        |
|                            | 2nd year      | 81/1166 ( 6.9%)   |                                                                                                                                                                        |
|                            | 3rd year      | 54/ 963 ( 5.6%)   |                                                                                                                                                                        |
|                            | Overall       | 335/1432 ( 23.4%) |                                                                                                                                                                        |
| Abdominal adhesions        | 2nd year      | 1/1166 ( <0.1%)   | 200908                                                                                                                                                                 |
|                            | Overall       | 1/1432 ( <0.1%)   | 200908                                                                                                                                                                 |
| Abdominal discomfort       | 1st year      | 5/1432 ( 0.3%)    | 200121, 230607, 241805, 243943, 243948                                                                                                                                 |
|                            | 2nd year      | 1/1166 ( <0.1%)   | 230607                                                                                                                                                                 |
|                            | Overall       | 5/1432 ( 0.3%)    | 200121, 230607, 241805, 243943, 243948                                                                                                                                 |
| Abdominal distension       | 1st year      | 17/1432 ( 1.2%)   | 120201, 141027, 141405, 141409, 160301, 160944, 200521, 210415, 230824, 241154, 243009, 243220, 243224, 243828, 244524, 245903, 245928                                 |
|                            | 2nd year      | 3/1166 ( 0.3%)    | 190225, 243026, 243903                                                                                                                                                 |
|                            | 3rd year      | 1/ 963 ( 0.1%)    | 161109                                                                                                                                                                 |
|                            | Overall       | 21/1432 ( 1.5%)   | 120201, 141027, 141405, 141409, 160301, 160944, 161109, 190225, 200521, 210415, 230824, 241154, 243009, 243026, 243220, 243224, 243828, 243903, 244524, 245903, 245928 |
|                            |               |                   |                                                                                                                                                                        |
| Abdominal hernia           | 1st year      | 1/1432 ( <0.1%)   | 240713                                                                                                                                                                 |
|                            | 3rd year      | 1/ 963 ( 0.1%)    | 160613                                                                                                                                                                 |
|                            | Overall       | 2/1432 ( 0.1%)    | 160613, 240713                                                                                                                                                         |
| Abdominal mass             | 1st year      | 1/1432 ( <0.1%)   | 245911                                                                                                                                                                 |
|                            | Overall       | 1/1432 ( <0.1%)   | 245911                                                                                                                                                                 |

**Table 14.3.1 / 10: Number of subjects with adverse events including subject identifier and year by treatment (FAS)**

TREATMENT: LCS12

| Primary system organ class | YEAR OF ONSET |                  | subject identifier                                                                                                                                                                                                                                                                                                                                                                                                                                                                                                                                                                                                                                                                                                                                                                                                             |
|----------------------------|---------------|------------------|--------------------------------------------------------------------------------------------------------------------------------------------------------------------------------------------------------------------------------------------------------------------------------------------------------------------------------------------------------------------------------------------------------------------------------------------------------------------------------------------------------------------------------------------------------------------------------------------------------------------------------------------------------------------------------------------------------------------------------------------------------------------------------------------------------------------------------|
| Preferred term             | ONSET         | N (%)            |                                                                                                                                                                                                                                                                                                                                                                                                                                                                                                                                                                                                                                                                                                                                                                                                                                |
| MedDRA version 14.0        |               |                  |                                                                                                                                                                                                                                                                                                                                                                                                                                                                                                                                                                                                                                                                                                                                                                                                                                |
| Abdominal pain             | 1st year      | 75/1432 ( 5.2%)  | 120104, 120320, 120411, 120412, 120414, 120419, 120611, 120619, 120623, 120626, 120630, 120632, 140105, 140116, 140117, 140118, 141405, 141409, 150149, 160102, 160119, 160425, 160434, 160514, 160536, 160565, 160572, 160601, 160701, 160712, 160717, 160736, 161026, 161316, 161511, 161512, 161531, 161540, 180714, 190403, 200101, 200219, 200503, 200527, 200613, 200623, 200629, 200708, 200908, 200923, 210109, 210136, 210411, 230809, 230901, 231022, 231103, 240622, 240814, 240841, 241169, 241410, 241414, 241424, 241518, 241718, 243121, 243125, 243320, 243939, 243969, 244125, 244438, 245929, 245932                                                                                                                                                                                                         |
|                            | 2nd year      | 20/1166 ( 1.7%)  | 120320, 120411, 140113, 141412, 160205, 160405, 160427, 160440, 161436, 180136, 180733, 200908, 210136, 230401, 240110, 241541, 241725, 243220, 243616, 244314                                                                                                                                                                                                                                                                                                                                                                                                                                                                                                                                                                                                                                                                 |
|                            | 3rd year      | 11/ 963 ( 1.1%)  | 140802, 180416, 200916, 210136, 210203, 231014, 240131, 241414, 242320, 244407, 244430                                                                                                                                                                                                                                                                                                                                                                                                                                                                                                                                                                                                                                                                                                                                         |
|                            | Overall       | 100/1432 ( 7.0%) | 120104, 120320, 120411, 120412, 120414, 120419, 120611, 120619, 120623, 120626, 120630, 120632, 140105, 140113, 140116, 140117, 140118, 140802, 141405, 141409, 141412, 150149, 160102, 160119, 160205, 160405, 160425, 160427, 160434, 160440, 160514, 160536, 160565, 160572, 160601, 160701, 160712, 160717, 160736, 161026, 161316, 161436, 161511, 161512, 161531, 161540, 180136, 180416, 180714, 180733, 190403, 200101, 200219, 200503, 200527, 200613, 200623, 200629, 200708, 200908, 200916, 200923, 210109, 210136, 210203, 210411, 230401, 230809, 230901, 231014, 231022, 231103, 240110, 240131, 240622, 240814, 240841, 241169, 241410, 241414, 241424, 241518, 241541, 241718, 241725, 242320, 243121, 243125, 243220, 243320, 243616, 243939, 243969, 244125, 244314, 244407, 244430, 244438, 245929, 245932 |

**Table 14.3.1 / 10: Number of subjects with adverse events including subject identifier and year by treatment (FAS)**

TREATMENT: LCS12

Primary system organ class

| Preferred term<br>MedDRA version 14.0 | YEAR OF<br>ONSET | N (%)           | subject identifier                                                                                                                                                                                                                                                                                                                                                                                                                                                                                                                                     |
|---------------------------------------|------------------|-----------------|--------------------------------------------------------------------------------------------------------------------------------------------------------------------------------------------------------------------------------------------------------------------------------------------------------------------------------------------------------------------------------------------------------------------------------------------------------------------------------------------------------------------------------------------------------|
| Abdominal pain lower                  | 1st year         | 47/1432 ( 3.3%) | 140301, 160106, 160110, 160130, 160212, 160213, 160217, 160415, 160514, 160525, 160536, 160576, 160605, 160615, 160640, 160911, 160925, 160933, 160949, 160976, 161001, 161102, 161124, 161318, 161440, 161518, 161540, 180605, 180673, 190110, 190133, 200111, 200802, 200904, 200908, 240521, 240627, 241507, 241811, 242227, 243327, 243611, 243806, 243807, 244117, 244602, 246121                                                                                                                                                                 |
|                                       | 2nd year         | 14/1166 ( 1.2%) | 160918, 160988, 161504, 161514, 200709, 241130, 241133, 241525, 241548, 243103, 243314, 243320, 244610, 245923                                                                                                                                                                                                                                                                                                                                                                                                                                         |
|                                       | 3rd year         | 8/ 963 ( 0.8%)  | 160113, 160525, 160633, 160949, 161109, 161322, 190132, 240715                                                                                                                                                                                                                                                                                                                                                                                                                                                                                         |
|                                       | Overall          | 67/1432 ( 4.7%) | 140301, 160106, 160110, 160113, 160130, 160212, 160213, 160217, 160415, 160514, 160525, 160536, 160576, 160605, 160615, 160633, 160640, 160911, 160918, 160925, 160933, 160949, 160976, 160988, 161001, 161102, 161109, 161124, 161318, 161322, 161440, 161504, 161514, 161518, 161540, 180605, 180673, 190110, 190132, 190133, 200111, 200709, 200802, 200904, 200908, 240521, 240627, 240715, 241130, 241133, 241507, 241525, 241548, 241811, 242227, 243103, 243314, 243320, 243327, 243611, 243806, 243807, 244117, 244602, 244610, 245923, 246121 |
| Abdominal pain upper                  | 1st year         | 5/1432 ( 0.3%)  | 120310, 120320, 200517, 200619, 230604                                                                                                                                                                                                                                                                                                                                                                                                                                                                                                                 |
|                                       | 2nd year         | 1/1166 ( <0.1%) | 243617                                                                                                                                                                                                                                                                                                                                                                                                                                                                                                                                                 |
|                                       | 3rd year         | 1/ 963 ( 0.1%)  | 160631                                                                                                                                                                                                                                                                                                                                                                                                                                                                                                                                                 |
|                                       | Overall          | 7/1432 ( 0.5%)  | 120310, 120320, 160631, 200517, 200619, 230604, 243617                                                                                                                                                                                                                                                                                                                                                                                                                                                                                                 |
| Abdominal tenderness                  | 1st year         | 2/1432 ( 0.1%)  | 244117, 245929                                                                                                                                                                                                                                                                                                                                                                                                                                                                                                                                         |
|                                       | Overall          | 2/1432 ( 0.1%)  | 244117, 245929                                                                                                                                                                                                                                                                                                                                                                                                                                                                                                                                         |
| Anal fissure                          | 2nd year         | 1/1166 ( <0.1%) | 141004                                                                                                                                                                                                                                                                                                                                                                                                                                                                                                                                                 |
|                                       | Overall          | 1/1432 ( <0.1%) | 141004                                                                                                                                                                                                                                                                                                                                                                                                                                                                                                                                                 |



**Table 14.3.1 / 10: Number of subjects with adverse events including subject identifier and year by treatment (FAS)**

TREATMENT: LCS12

| Primary system organ class<br>Preferred term<br>MedDRA version 14.0 | YEAR OF<br>ONSET | N (%)           | subject identifier                                                                                                                   |
|---------------------------------------------------------------------|------------------|-----------------|--------------------------------------------------------------------------------------------------------------------------------------|
| Anal pruritus                                                       | 1st year         | 1/1432 ( <0.1%) | 160734                                                                                                                               |
|                                                                     | 2nd year         | 1/1166 ( <0.1%) | 160567                                                                                                                               |
|                                                                     | 3rd year         | 1/ 963 ( 0.1%)  | 161117                                                                                                                               |
|                                                                     | Overall          | 3/1432 ( 0.2%)  | 160567, 160734, 161117                                                                                                               |
| Breath odour                                                        | 2nd year         | 1/1166 ( <0.1%) | 161410                                                                                                                               |
|                                                                     | Overall          | 1/1432 ( <0.1%) | 161410                                                                                                                               |
| Coeliac disease                                                     | 2nd year         | 1/1166 ( <0.1%) | 242907                                                                                                                               |
|                                                                     | Overall          | 1/1432 ( <0.1%) | 242907                                                                                                                               |
| Colitis                                                             | 2nd year         | 1/1166 ( <0.1%) | 190411                                                                                                                               |
|                                                                     | Overall          | 1/1432 ( <0.1%) | 190411                                                                                                                               |
| Colitis ulcerative                                                  | 1st year         | 1/1432 ( <0.1%) | 140202                                                                                                                               |
|                                                                     | 2nd year         | 1/1166 ( <0.1%) | 140212                                                                                                                               |
|                                                                     | Overall          | 2/1432 ( 0.1%)  | 140202, 140212                                                                                                                       |
| Colonic polyp                                                       | 2nd year         | 1/1166 ( <0.1%) | 242212                                                                                                                               |
|                                                                     | Overall          | 1/1432 ( <0.1%) | 242212                                                                                                                               |
| Constipation                                                        | 1st year         | 11/1432 ( 0.8%) | 120104, 200521, 200901, 200908, 210111, 240525,<br>240825, 241545, 242326, 243121, 244117                                            |
|                                                                     | 2nd year         | 3/1166 ( 0.3%)  | 141004, 243904, 245916                                                                                                               |
|                                                                     | 3rd year         | 3/ 963 ( 0.3%)  | 240828, 241545, 244412                                                                                                               |
|                                                                     | Overall          | 16/1432 ( 1.1%) | 120104, 141004, 200521, 200901, 200908, 210111,<br>240525, 240825, 240828, 241545, 242326, 243121,<br>243904, 244117, 244412, 245916 |
| Crohn's disease                                                     | 1st year         | 2/1432 ( 0.1%)  | 161537, 240209                                                                                                                       |
|                                                                     | Overall          | 2/1432 ( 0.1%)  | 161537, 240209                                                                                                                       |
| Dental caries                                                       | 1st year         | 1/1432 ( <0.1%) | 244004                                                                                                                               |
|                                                                     | Overall          | 1/1432 ( <0.1%) | 244004                                                                                                                               |

**Table 14.3.1 / 10: Number of subjects with adverse events including subject identifier and year by treatment (FAS)**

TREATMENT: LCS12

Primary system organ class

| Preferred term<br>MedDRA version 14.0 | YEAR OF<br>ONSET | N (%)           | subject identifier                                                                                                                                     |
|---------------------------------------|------------------|-----------------|--------------------------------------------------------------------------------------------------------------------------------------------------------|
| Diarrhoea                             | 1st year         | 13/1432 ( 0.9%) | 120104, 120417, 120632, 140105, 140111, 141301, 161026, 161410, 210125, 242910, 243125, 243323, 243904                                                 |
|                                       | 2nd year         | 2/1166 ( 0.2%)  | 140802, 242902                                                                                                                                         |
|                                       | 3rd year         | 4/ 963 ( 0.4%)  | 120320, 150153, 161017, 161539                                                                                                                         |
|                                       | Overall          | 19/1432 ( 1.3%) | 120104, 120320, 120417, 120632, 140105, 140111, 140802, 141301, 150153, 161017, 161026, 161410, 161539, 210125, 242902, 242910, 243125, 243323, 243904 |
| Duodenal ulcer                        | 3rd year         | 1/ 963 ( 0.1%)  | 150109                                                                                                                                                 |
|                                       | Overall          | 1/1432 ( <0.1%) | 150109                                                                                                                                                 |
| Dyspepsia                             | 1st year         | 6/1432 ( 0.4%)  | 160522, 160571, 160806, 210203, 240713, 241536                                                                                                         |
|                                       | 2nd year         | 3/1166 ( 0.3%)  | 160102, 160606, 244523                                                                                                                                 |
|                                       | 3rd year         | 5/ 963 ( 0.5%)  | 140302, 141032, 160624, 161109, 161308                                                                                                                 |
|                                       | Overall          | 14/1432 ( 1.0%) | 140302, 141032, 160102, 160522, 160571, 160606, 160624, 160806, 161109, 161308, 210203, 240713, 241536, 244523                                         |
| Dysphagia                             | 1st year         | 1/1432 ( <0.1%) | 244707                                                                                                                                                 |
|                                       | Overall          | 1/1432 ( <0.1%) | 244707                                                                                                                                                 |
| Flatulence                            | 1st year         | 2/1432 ( 0.1%)  | 200521, 210411                                                                                                                                         |
|                                       | Overall          | 2/1432 ( 0.1%)  | 200521, 210411                                                                                                                                         |
| Food poisoning                        | 1st year         | 1/1432 ( <0.1%) | 244518                                                                                                                                                 |
|                                       | Overall          | 1/1432 ( <0.1%) | 244518                                                                                                                                                 |
| Frequent bowel movements              | 1st year         | 2/1432 ( 0.1%)  | 210111, 244524                                                                                                                                         |
|                                       | Overall          | 2/1432 ( 0.1%)  | 210111, 244524                                                                                                                                         |
| Gastric ulcer                         | 1st year         | 1/1432 ( <0.1%) | 230713                                                                                                                                                 |
|                                       | 2nd year         | 1/1166 ( <0.1%) | 243978                                                                                                                                                 |
|                                       | Overall          | 2/1432 ( 0.1%)  | 230713, 243978                                                                                                                                         |

**Table 14.3.1 / 10: Number of subjects with adverse events including subject identifier and year by treatment (FAS)**

TREATMENT: LCS12

Primary system organ class

Preferred term

MedDRA version 14.0

|                                 | YEAR OF ONSET | N (%)           | subject identifier                                                                                     |
|---------------------------------|---------------|-----------------|--------------------------------------------------------------------------------------------------------|
| Gastritis                       | 1st year      | 6/1432 ( 0.4%)  | 161026, 200710, 230310, 230908, 231002, 243125                                                         |
|                                 | 2nd year      | 2/1166 ( 0.2%)  | 120119, 200914                                                                                         |
|                                 | 3rd year      | 5/ 963 ( 0.5%)  | 120307, 150109, 200505, 210106, 230318                                                                 |
|                                 | Overall       | 13/1432 ( 0.9%) | 120119, 120307, 150109, 161026, 200505, 200710, 200914, 210106, 230310, 230318, 230908, 231002, 243125 |
|                                 |               |                 |                                                                                                        |
| Gastrointestinal disorder       | 2nd year      | 1/1166 ( <0.1%) | 241513                                                                                                 |
|                                 | Overall       | 1/1432 ( <0.1%) | 241513                                                                                                 |
| Gastrointestinal pain           | 1st year      | 1/1432 ( <0.1%) | 150123                                                                                                 |
|                                 | Overall       | 1/1432 ( <0.1%) | 150123                                                                                                 |
| Gastroesophageal reflux disease | 1st year      | 6/1432 ( 0.4%)  | 140914, 240505, 241536, 243938, 244117, 245910                                                         |
|                                 | 2nd year      | 2/1166 ( 0.2%)  | 140802, 244443                                                                                         |
|                                 | 3rd year      | 1/ 963 ( 0.1%)  | 246212                                                                                                 |
|                                 | Overall       | 9/1432 ( 0.6%)  | 140802, 140914, 240505, 241536, 243938, 244117, 244443, 245910, 246212                                 |
| Gingival oedema                 | 3rd year      | 1/ 963 ( 0.1%)  | 140808                                                                                                 |
|                                 | Overall       | 1/1432 ( <0.1%) | 140808                                                                                                 |
| Gingival recession              | 1st year      | 1/1432 ( <0.1%) | 245531                                                                                                 |
|                                 | Overall       | 1/1432 ( <0.1%) | 245531                                                                                                 |
| Gingivitis                      | 1st year      | 1/1432 ( <0.1%) | 160606                                                                                                 |
|                                 | Overall       | 1/1432 ( <0.1%) | 160606                                                                                                 |
| Haematochezia                   | 2nd year      | 1/1166 ( <0.1%) | 246119                                                                                                 |
|                                 | Overall       | 1/1432 ( <0.1%) | 246119                                                                                                 |
| Haemorrhoids                    | 1st year      | 3/1432 ( 0.2%)  | 140918, 240223, 240818                                                                                 |
|                                 | 2nd year      | 2/1166 ( 0.2%)  | 141031, 160606                                                                                         |
|                                 | 3rd year      | 2/ 963 ( 0.2%)  | 160555, 243914                                                                                         |
|                                 | Overall       | 7/1432 ( 0.5%)  | 140918, 141031, 160555, 160606, 240223, 240818, 243914                                                 |

**Table 14.3.1 / 10: Number of subjects with adverse events including subject identifier and year by treatment (FAS)**

TREATMENT: LCS12

Primary system organ class

| Preferred term<br>MedDRA version 14.0 | YEAR OF<br>ONSET | N (%)           | subject identifier                                                                        |
|---------------------------------------|------------------|-----------------|-------------------------------------------------------------------------------------------|
| Hyperchlorhydria                      | 1st year         | 1/1432 ( <0.1%) | 180707                                                                                    |
|                                       | 2nd year         | 1/1166 ( <0.1%) | 180733                                                                                    |
|                                       | Overall          | 2/1432 ( 0.1%)  | 180707, 180733                                                                            |
| Impaired gastric emptying             | 1st year         | 1/1432 ( <0.1%) | 240209                                                                                    |
|                                       | Overall          | 1/1432 ( <0.1%) | 240209                                                                                    |
| Inguinal hernia                       | 2nd year         | 1/1166 ( <0.1%) | 246220                                                                                    |
|                                       | Overall          | 1/1432 ( <0.1%) | 246220                                                                                    |
| Irritable bowel syndrome              | 1st year         | 5/1432 ( 0.3%)  | 150104, 150109, 150142, 150166, 240505                                                    |
|                                       | 2nd year         | 4/1166 ( 0.3%)  | 150101, 150138, 150168, 244918                                                            |
|                                       | 3rd year         | 2/ 963 ( 0.2%)  | 150149, 200505                                                                            |
|                                       | Overall          | 11/1432 ( 0.8%) | 150101, 150104, 150109, 150138, 150142, 150149,<br>150166, 150168, 200505, 240505, 244918 |

**Table 14.3.1 / 10: Number of subjects with adverse events including subject identifier and year by treatment (FAS)**

TREATMENT: LCS12

Primary system organ class

| Preferred term<br>MedDRA version 14.0 | YEAR OF<br>ONSET | N (%)           | subject identifier                                                                                                                                                                                                                                                                                                                                                                                                                                                                                                                                                                                             |
|---------------------------------------|------------------|-----------------|----------------------------------------------------------------------------------------------------------------------------------------------------------------------------------------------------------------------------------------------------------------------------------------------------------------------------------------------------------------------------------------------------------------------------------------------------------------------------------------------------------------------------------------------------------------------------------------------------------------|
| Nausea                                | 1st year         | 49/1432 ( 3.4%) | 120320, 120335, 140118, 140206, 140304, 140802, 140808, 141301, 141405, 141409, 150106, 160129, 160311, 160601, 160738, 160944, 160973, 161026, 180342, 190402, 190409, 200505, 200517, 200521, 200629, 230408, 230615, 230816, 230904, 231112, 240217, 240223, 240521, 241119, 241410, 241414, 241536, 241805, 242326, 242807, 243323, 243502, 244117, 244427, 244438, 244711, 244917, 244931, 246205                                                                                                                                                                                                         |
|                                       | 2nd year         | 18/1166 ( 1.5%) | 120623, 140817, 150153, 180409, 231018, 240110, 241019, 241130, 241133, 241513, 242907, 242910, 243222, 243314, 243611, 243965, 245910, 246220                                                                                                                                                                                                                                                                                                                                                                                                                                                                 |
|                                       | 3rd year         | 9/ 963 ( 0.9%)  | 190402, 210124, 230406, 240110, 240131, 241548, 242812, 243231, 244412                                                                                                                                                                                                                                                                                                                                                                                                                                                                                                                                         |
|                                       | Overall          | 74/1432 ( 5.2%) | 120320, 120335, 120623, 140118, 140206, 140304, 140802, 140808, 140817, 141301, 141405, 141409, 150106, 150153, 160129, 160311, 160601, 160738, 160944, 160973, 161026, 180342, 180409, 190402, 190409, 200505, 200517, 200521, 200629, 210124, 230406, 230408, 230615, 230816, 230904, 231018, 231112, 240110, 240131, 240217, 240223, 240521, 241019, 241119, 241130, 241133, 241410, 241414, 241513, 241536, 241548, 241805, 242326, 242807, 242812, 242907, 242910, 243222, 243231, 243314, 243323, 243502, 243611, 243965, 244117, 244412, 244427, 244438, 244711, 244917, 244931, 245910, 246205, 246220 |
| Oesophagitis                          | 3rd year         | 1/ 963 ( 0.1%)  | 161532                                                                                                                                                                                                                                                                                                                                                                                                                                                                                                                                                                                                         |
|                                       | Overall          | 1/1432 ( <0.1%) | 161532                                                                                                                                                                                                                                                                                                                                                                                                                                                                                                                                                                                                         |
| Peptic ulcer                          | 2nd year         | 1/1166 ( <0.1%) | 240223                                                                                                                                                                                                                                                                                                                                                                                                                                                                                                                                                                                                         |
|                                       | Overall          | 1/1432 ( <0.1%) | 240223                                                                                                                                                                                                                                                                                                                                                                                                                                                                                                                                                                                                         |
| Periodontitis                         | 1st year         | 1/1432 ( <0.1%) | 190117                                                                                                                                                                                                                                                                                                                                                                                                                                                                                                                                                                                                         |
|                                       | 3rd year         | 1/ 963 ( 0.1%)  | 200516                                                                                                                                                                                                                                                                                                                                                                                                                                                                                                                                                                                                         |
|                                       | Overall          | 2/1432 ( 0.1%)  | 190117, 200516                                                                                                                                                                                                                                                                                                                                                                                                                                                                                                                                                                                                 |

**Table 14.3.1 / 10: Number of subjects with adverse events including subject identifier and year by treatment (FAS)**

TREATMENT: LCS12

Primary system organ class

| Preferred term<br>MedDRA version 14.0                | YEAR OF<br>ONSET | N (%)            | subject identifier                                                                                                                     |
|------------------------------------------------------|------------------|------------------|----------------------------------------------------------------------------------------------------------------------------------------|
| Peritonitis                                          | 2nd year         | 1/1166 ( <0.1%)  | 120330                                                                                                                                 |
|                                                      | Overall          | 1/1432 ( <0.1%)  | 120330                                                                                                                                 |
| Proctalgia                                           | 2nd year         | 2/1166 ( 0.2%)   | 160606, 243616                                                                                                                         |
|                                                      | Overall          | 2/1432 ( 0.1%)   | 160606, 243616                                                                                                                         |
| Tooth disorder                                       | 1st year         | 3/1432 ( 0.2%)   | 120326, 160615, 160924                                                                                                                 |
|                                                      | Overall          | 3/1432 ( 0.2%)   | 120326, 160615, 160924                                                                                                                 |
| Tooth impacted                                       | 1st year         | 1/1432 ( <0.1%)  | 241168                                                                                                                                 |
|                                                      | 2nd year         | 1/1166 ( <0.1%)  | 245914                                                                                                                                 |
|                                                      | Overall          | 2/1432 ( 0.1%)   | 241168, 245914                                                                                                                         |
| Toothache                                            | 1st year         | 12/1432 ( 0.8%)  | 120310, 120322, 120613, 120623, 120634, 140113, 160624, 160625, 160722, 190203, 241606, 244509                                         |
|                                                      | 2nd year         | 2/1166 ( 0.2%)   | 120412, 120623                                                                                                                         |
|                                                      | 3rd year         | 4/ 963 ( 0.4%)   | 161308, 161517, 244407, 245525                                                                                                         |
|                                                      | Overall          | 17/1432 ( 1.2%)  | 120310, 120322, 120412, 120613, 120623, 120634, 140113, 160624, 160625, 160722, 161308, 161517, 190203, 241606, 244407, 244509, 245525 |
| Vomiting                                             | 1st year         | 12/1432 ( 0.8%)  | 140808, 160511, 161023, 200517, 240707, 241410, 241536, 243323, 244117, 244403, 244438, 244711                                         |
|                                                      | 2nd year         | 4/1166 ( 0.3%)   | 120602, 160405, 243222, 244523                                                                                                         |
|                                                      | 3rd year         | 1/ 963 ( 0.1%)   | 242812                                                                                                                                 |
|                                                      | Overall          | 17/1432 ( 1.2%)  | 120602, 140808, 160405, 160511, 161023, 200517, 240707, 241410, 241536, 242812, 243222, 243323, 244117, 244403, 244438, 244523, 244711 |
| General disorders and administration site conditions | 1st year         | 63/1432 ( 4.4%)  |                                                                                                                                        |
|                                                      | 2nd year         | 34/1166 ( 2.9%)  |                                                                                                                                        |
|                                                      | 3rd year         | 22/ 963 ( 2.3%)  |                                                                                                                                        |
|                                                      | Overall          | 113/1432 ( 7.9%) |                                                                                                                                        |
| Asthenia                                             | 1st year         | 1/1432 ( <0.1%)  | 243702                                                                                                                                 |
|                                                      | 2nd year         | 1/1166 ( <0.1%)  | 150108                                                                                                                                 |
|                                                      | Overall          | 2/1432 ( 0.1%)   | 150108, 243702                                                                                                                         |

**Table 14.3.1 / 10: Number of subjects with adverse events including subject identifier and year by treatment (FAS)**

TREATMENT: LCS12

Primary system organ class

| Preferred term<br>MedDRA version 14.0 | YEAR OF<br>ONSET | N (%)           | subject identifier                                                                                                                                                                                                                                                                                                                                                             |
|---------------------------------------|------------------|-----------------|--------------------------------------------------------------------------------------------------------------------------------------------------------------------------------------------------------------------------------------------------------------------------------------------------------------------------------------------------------------------------------|
| Axillary pain                         | 3rd year         | 1/ 963 ( 0.1%)  | 244430                                                                                                                                                                                                                                                                                                                                                                         |
|                                       | Overall          | 1/1432 ( <0.1%) | 244430                                                                                                                                                                                                                                                                                                                                                                         |
| Chest pain                            | 1st year         | 2/1432 ( 0.1%)  | 242320, 243219                                                                                                                                                                                                                                                                                                                                                                 |
|                                       | 2nd year         | 3/1166 ( 0.3%)  | 160625, 240739, 242506                                                                                                                                                                                                                                                                                                                                                         |
|                                       | 3rd year         | 1/ 963 ( 0.1%)  | 242320                                                                                                                                                                                                                                                                                                                                                                         |
|                                       | Overall          | 5/1432 ( 0.3%)  | 160625, 240739, 242320, 242506, 243219                                                                                                                                                                                                                                                                                                                                         |
| Cyst                                  | 1st year         | 1/1432 ( <0.1%) | 242714                                                                                                                                                                                                                                                                                                                                                                         |
|                                       | 2nd year         | 2/1166 ( 0.2%)  | 140802, 141022                                                                                                                                                                                                                                                                                                                                                                 |
|                                       | Overall          | 3/1432 ( 0.2%)  | 140802, 141022, 242714                                                                                                                                                                                                                                                                                                                                                         |
| Device dislocation                    | 1st year         | 2/1432 ( 0.1%)  | 240808, 241733                                                                                                                                                                                                                                                                                                                                                                 |
|                                       | 3rd year         | 1/ 963 ( 0.1%)  | 140605                                                                                                                                                                                                                                                                                                                                                                         |
|                                       | Overall          | 3/1432 ( 0.2%)  | 140605, 240808, 241733                                                                                                                                                                                                                                                                                                                                                         |
| Device expulsion                      | 1st year         | 25/1432 ( 1.7%) | 141416, 150155, 160309, 180315, 180636, 190218, 200604, 230312, 240351, 240364, 240625, 240638, 241187, 242909, 243803, 243810, 244003, 244316, 244601, 244937, 245907, 245932, 245934, 246121, 246125                                                                                                                                                                         |
|                                       | 2nd year         | 9/1166 ( 0.8%)  | 120240, 120242, 160220, 161431, 180302, 200705, 210519, 244109, 245402                                                                                                                                                                                                                                                                                                         |
|                                       | 3rd year         | 12/ 963 ( 1.2%) | 120329, 120623, 141426, 190635, 230816, 240634, 241201, 241704, 243511, 244422, 245415, 246212                                                                                                                                                                                                                                                                                 |
|                                       | Overall          | 46/1432 ( 3.2%) | 120240, 120242, 120329, 120623, 141416, 141426, 150155, 160220, 160309, 161431, 180302, 180315, 180636, 190218, 190635, 200604, 200705, 210519, 230312, 230816, 240351, 240364, 240625, 240634, 240638, 241187, 241201, 241704, 242909, 243511, 243803, 243810, 244003, 244109, 244316, 244422, 244601, 244937, 245402, 245415, 245907, 245932, 245934, 246121, 246125, 246212 |
| Discomfort                            | 1st year         | 1/1432 ( <0.1%) | 160984                                                                                                                                                                                                                                                                                                                                                                         |
|                                       | 2nd year         | 1/1166 ( <0.1%) | 200908                                                                                                                                                                                                                                                                                                                                                                         |
|                                       | Overall          | 2/1432 ( 0.1%)  | 160984, 200908                                                                                                                                                                                                                                                                                                                                                                 |

**Table 14.3.1 / 10: Number of subjects with adverse events including subject identifier and year by treatment (FAS)**

TREATMENT: LCS12

Primary system organ class

| Preferred term<br>MedDRA version 14.0 | YEAR OF<br>ONSET | N (%)           | subject identifier                                                                                                                                                                             |
|---------------------------------------|------------------|-----------------|------------------------------------------------------------------------------------------------------------------------------------------------------------------------------------------------|
| Drug withdrawal syndrome              | 3rd year         | 1/ 963 ( 0.1%)  | 241708                                                                                                                                                                                         |
|                                       | Overall          | 1/1432 ( <0.1%) | 241708                                                                                                                                                                                         |
| Fatigue                               | 1st year         | 12/1432 ( 0.8%) | 140515, 141402, 141405, 141426, 180624, 200505, 230515, 240217, 241410, 243213, 244524, 244618                                                                                                 |
|                                       | 2nd year         | 8/1166 ( 0.7%)  | 140802, 241305, 241704, 243213, 243611, 243830, 244931, 245910                                                                                                                                 |
|                                       | 3rd year         | 5/ 963 ( 0.5%)  | 140911, 160519, 200521, 241130, 241302                                                                                                                                                         |
|                                       | Overall          | 24/1432 ( 1.7%) | 140515, 140802, 140911, 141402, 141405, 141426, 160519, 180624, 200505, 200521, 230515, 240217, 241130, 241302, 241305, 241410, 241704, 243213, 243611, 243830, 244524, 244618, 244931, 245910 |
| Generalised oedema                    | 3rd year         | 1/ 963 ( 0.1%)  | 244105                                                                                                                                                                                         |
|                                       | Overall          | 1/1432 ( <0.1%) | 244105                                                                                                                                                                                         |
| Hangover                              | 1st year         | 1/1432 ( <0.1%) | 160749                                                                                                                                                                                         |
|                                       | Overall          | 1/1432 ( <0.1%) | 160749                                                                                                                                                                                         |
| Inflammation                          | 1st year         | 1/1432 ( <0.1%) | 200908                                                                                                                                                                                         |
|                                       | Overall          | 1/1432 ( <0.1%) | 200908                                                                                                                                                                                         |
| Influenza like illness                | 2nd year         | 1/1166 ( <0.1%) | 170702                                                                                                                                                                                         |
|                                       | Overall          | 1/1432 ( <0.1%) | 170702                                                                                                                                                                                         |
| Irritability                          | 1st year         | 2/1432 ( 0.1%)  | 240309, 241193                                                                                                                                                                                 |
|                                       | Overall          | 2/1432 ( 0.1%)  | 240309, 241193                                                                                                                                                                                 |
| Oedema peripheral                     | 1st year         | 3/1432 ( 0.2%)  | 120401, 140301, 141405                                                                                                                                                                         |
|                                       | 2nd year         | 1/1166 ( <0.1%) | 160564                                                                                                                                                                                         |
|                                       | Overall          | 4/1432 ( 0.3%)  | 120401, 140301, 141405, 160564                                                                                                                                                                 |
| Pain                                  | 1st year         | 5/1432 ( 0.3%)  | 160524, 200901, 241410, 244931, 245027                                                                                                                                                         |
|                                       | 2nd year         | 1/1166 ( <0.1%) | 242907                                                                                                                                                                                         |
|                                       | Overall          | 6/1432 ( 0.4%)  | 160524, 200901, 241410, 242907, 244931, 245027                                                                                                                                                 |



**Table 14.3.1 / 10: Number of subjects with adverse events including subject identifier and year by treatment (FAS)**

TREATMENT: LCS12

Primary system organ class

| Preferred term<br>MedDRA version 14.0 | YEAR OF<br>ONSET | N (%)           | subject identifier                                                                                                                                   |
|---------------------------------------|------------------|-----------------|------------------------------------------------------------------------------------------------------------------------------------------------------|
| Pyrexia                               | 1st year         | 10/1432 ( 0.7%) | 160506, 210404, 210409, 231017, 241202, 241410,<br>241424, 241536, 243322, 244117                                                                    |
|                                       | 2nd year         | 7/1166 ( 0.6%)  | 160623, 160633, 161104, 190636, 200624, 210119,<br>242910                                                                                            |
|                                       | 3rd year         | 1/ 963 ( 0.1%)  | 120623                                                                                                                                               |
|                                       | Overall          | 18/1432 ( 1.3%) | 120623, 160506, 160623, 160633, 161104, 190636,<br>200624, 210119, 210404, 210409, 231017, 241202,<br>241410, 241424, 241536, 242910, 243322, 244117 |
| Vaccination site pain                 | 2nd year         | 1/1166 ( <0.1%) | 160427                                                                                                                                               |
|                                       | Overall          | 1/1432 ( <0.1%) | 160427                                                                                                                                               |
| Hepatobiliary disorders               | 1st year         | 5/1432 ( 0.3%)  |                                                                                                                                                      |
|                                       | 2nd year         | 2/1166 ( 0.2%)  |                                                                                                                                                      |
|                                       | 3rd year         | 2/ 963 ( 0.2%)  |                                                                                                                                                      |
|                                       | Overall          | 8/1432 ( 0.6%)  |                                                                                                                                                      |
| Biliary dyskinesia                    | 3rd year         | 1/ 963 ( 0.1%)  | 230201                                                                                                                                               |
|                                       | Overall          | 1/1432 ( <0.1%) | 230201                                                                                                                                               |
| Cholecystitis                         | 1st year         | 1/1432 ( <0.1%) | 240215                                                                                                                                               |
|                                       | 3rd year         | 2/ 963 ( 0.2%)  | 230201, 242308                                                                                                                                       |
|                                       | Overall          | 3/1432 ( 0.2%)  | 230201, 240215, 242308                                                                                                                               |
| Cholecystitis chronic                 | 1st year         | 1/1432 ( <0.1%) | 241536                                                                                                                                               |
|                                       | 2nd year         | 1/1166 ( <0.1%) | 243617                                                                                                                                               |
|                                       | Overall          | 2/1432 ( 0.1%)  | 241536, 243617                                                                                                                                       |
| Cholelithiasis                        | 1st year         | 3/1432 ( 0.2%)  | 160520, 230201, 243938                                                                                                                               |
|                                       | 2nd year         | 1/1166 ( <0.1%) | 240739                                                                                                                                               |
|                                       | Overall          | 4/1432 ( 0.3%)  | 160520, 230201, 240739, 243938                                                                                                                       |
| Gallbladder polyp                     | 1st year         | 1/1432 ( <0.1%) | 240215                                                                                                                                               |
|                                       | Overall          | 1/1432 ( <0.1%) | 240215                                                                                                                                               |
| Immune system disorders               | 1st year         | 39/1432 ( 2.7%) |                                                                                                                                                      |
|                                       | 2nd year         | 25/1166 ( 2.1%) |                                                                                                                                                      |
|                                       | 3rd year         | 18/ 963 ( 1.9%) |                                                                                                                                                      |
|                                       | Overall          | 63/1432 ( 4.4%) |                                                                                                                                                      |

**Table 14.3.1 / 10: Number of subjects with adverse events including subject identifier and year by treatment (FAS)**

TREATMENT: LCS12

Primary system organ class

| Preferred term<br>MedDRA version 14.0 | YEAR OF<br>ONSET | N (%)           | subject identifier                                                                                     |
|---------------------------------------|------------------|-----------------|--------------------------------------------------------------------------------------------------------|
| Allergy to animal                     | 3rd year         | 1/ 963 ( 0.1%)  | 140105                                                                                                 |
|                                       | Overall          | 1/1432 ( <0.1%) | 140105                                                                                                 |
| Allergy to arthropod bite             | 1st year         | 1/1432 ( <0.1%) | 161003                                                                                                 |
|                                       | Overall          | 1/1432 ( <0.1%) | 161003                                                                                                 |
| Allergy to chemicals                  | 1st year         | 1/1432 ( <0.1%) | 140105                                                                                                 |
|                                       | Overall          | 1/1432 ( <0.1%) | 140105                                                                                                 |
| Drug hypersensitivity                 | 1st year         | 5/1432 ( 0.3%)  | 160617, 160935, 161517, 200901, 243929                                                                 |
|                                       | 2nd year         | 2/1166 ( 0.2%)  | 160806, 200908                                                                                         |
|                                       | 3rd year         | 2/ 963 ( 0.2%)  | 242320, 245701                                                                                         |
|                                       | Overall          | 9/1432 ( 0.6%)  | 160617, 160806, 160935, 161517, 200901, 200908, 242320, 243929, 245701                                 |
| Food allergy                          | 1st year         | 1/1432 ( <0.1%) | 242308                                                                                                 |
|                                       | Overall          | 1/1432 ( <0.1%) | 242308                                                                                                 |
| Hypersensitivity                      | 1st year         | 8/1432 ( 0.6%)  | 120312, 120403, 120604, 120621, 120633, 140221, 161210, 180707                                         |
|                                       | 2nd year         | 3/1166 ( 0.3%)  | 120623, 161202, 241302                                                                                 |
|                                       | 3rd year         | 3/ 963 ( 0.3%)  | 140511, 161202, 244523                                                                                 |
|                                       | Overall          | 13/1432 ( 0.9%) | 120312, 120403, 120604, 120621, 120623, 120633, 140221, 140511, 161202, 161210, 180707, 241302, 244523 |

**Table 14.3.1 / 10: Number of subjects with adverse events including subject identifier and year by treatment (FAS)**

TREATMENT: LCS12

Primary system organ class

| Preferred term<br>MedDRA version 14.0 | YEAR OF<br>ONSET | N (%)             | subject identifier                                                                                                                                                                                                                                                                                                     |
|---------------------------------------|------------------|-------------------|------------------------------------------------------------------------------------------------------------------------------------------------------------------------------------------------------------------------------------------------------------------------------------------------------------------------|
| Seasonal allergy                      | 1st year         | 24/1432 ( 1.7%)   | 140215, 160212, 160416, 160525, 160615, 160717, 160741, 160801, 160917, 160951, 161003, 161015, 161018, 161316, 161410, 161414, 161424, 161426, 200506, 231108, 241153, 243919, 244307, 244422                                                                                                                         |
|                                       | 2nd year         | 20/1166 ( 1.7%)   | 140302, 160416, 160569, 160717, 160741, 160944, 160951, 161316, 161407, 161410, 161414, 161424, 161426, 180734, 241305, 241704, 243322, 244608, 245402, 245808                                                                                                                                                         |
|                                       | 3rd year         | 12/ 963 ( 1.2%)   | 160416, 160525, 160616, 160741, 160951, 161316, 161410, 161414, 161426, 180511, 244430, 244607                                                                                                                                                                                                                         |
|                                       | Overall          | 39/1432 ( 2.7%)   | 140215, 140302, 160212, 160416, 160525, 160569, 160615, 160616, 160717, 160741, 160801, 160917, 160944, 160951, 161003, 161015, 161018, 161316, 161407, 161410, 161414, 161424, 161426, 180511, 180734, 200506, 231108, 241153, 241305, 241704, 243322, 243919, 244307, 244422, 244430, 244607, 244608, 245402, 245808 |
| Infections and infestations           | 1st year         | 534/1432 ( 37.3%) |                                                                                                                                                                                                                                                                                                                        |
|                                       | 2nd year         | 320/1166 ( 27.4%) |                                                                                                                                                                                                                                                                                                                        |
|                                       | 3rd year         | 228/ 963 ( 23.7%) |                                                                                                                                                                                                                                                                                                                        |
|                                       | Overall          | 722/1432 ( 50.4%) |                                                                                                                                                                                                                                                                                                                        |
| Acarodermatitis                       | 2nd year         | 1/1166 ( <0.1%)   | 200911                                                                                                                                                                                                                                                                                                                 |
|                                       | 3rd year         | 1/ 963 ( 0.1%)    | 120619                                                                                                                                                                                                                                                                                                                 |
|                                       | Overall          | 2/1432 ( 0.1%)    | 120619, 200911                                                                                                                                                                                                                                                                                                         |
| Acute sinusitis                       | 1st year         | 1/1432 ( <0.1%)   | 160985                                                                                                                                                                                                                                                                                                                 |
|                                       | 2nd year         | 3/1166 ( 0.3%)    | 160548, 160749, 160754                                                                                                                                                                                                                                                                                                 |
|                                       | 3rd year         | 4/ 963 ( 0.4%)    | 160749, 161012, 161221, 241305                                                                                                                                                                                                                                                                                         |
|                                       | Overall          | 7/1432 ( 0.5%)    | 160548, 160749, 160754, 160985, 161012, 161221, 241305                                                                                                                                                                                                                                                                 |
| Acute tonsillitis                     | 1st year         | 8/1432 ( 0.6%)    | 150138, 160217, 160520, 160539, 160564, 160729, 161304, 170901                                                                                                                                                                                                                                                         |
|                                       | 2nd year         | 1/1166 ( <0.1%)   | 161202                                                                                                                                                                                                                                                                                                                 |
|                                       | 3rd year         | 1/ 963 ( 0.1%)    | 120401                                                                                                                                                                                                                                                                                                                 |
|                                       | Overall          | 10/1432 ( 0.7%)   | 120401, 150138, 160217, 160520, 160539, 160564, 160729, 161202, 161304, 170901                                                                                                                                                                                                                                         |

**Table 14.3.1 / 10: Number of subjects with adverse events including subject identifier and year by treatment (FAS)**

TREATMENT: LCS12

Primary system organ class

| Preferred term<br>MedDRA version 14.0 | YEAR OF<br>ONSET | N (%)           | subject identifier                                                                     |
|---------------------------------------|------------------|-----------------|----------------------------------------------------------------------------------------|
| Anogenital warts                      | 1st year         | 8/1432 ( 0.6%)  | 120623, 210136, 210409, 230405, 243609, 243907, 244509, 245923                         |
|                                       | 2nd year         | 3/1166 ( 0.3%)  | 160406, 200505, 243925                                                                 |
|                                       | Overall          | 11/1432 ( 0.8%) | 120623, 160406, 200505, 210136, 210409, 230405, 243609, 243907, 243925, 244509, 245923 |
| Appendicitis                          | 1st year         | 4/1432 ( 0.3%)  | 150111, 160416, 241106, 241172                                                         |
|                                       | 2nd year         | 2/1166 ( 0.2%)  | 120330, 160973                                                                         |
|                                       | Overall          | 6/1432 ( 0.4%)  | 120330, 150111, 160416, 160973, 241106, 241172                                         |
| Arthritis rubella                     | 2nd year         | 1/1166 ( <0.1%) | 170306                                                                                 |
|                                       | Overall          | 1/1432 ( <0.1%) | 170306                                                                                 |
| Bartholin's abscess                   | 1st year         | 2/1432 ( 0.1%)  | 243933, 244617                                                                         |
|                                       | 3rd year         | 1/ 963 ( 0.1%)  | 240226                                                                                 |
|                                       | Overall          | 3/1432 ( 0.2%)  | 240226, 243933, 244617                                                                 |
| Body tinea                            | 1st year         | 1/1432 ( <0.1%) | 210111                                                                                 |
|                                       | 3rd year         | 1/ 963 ( 0.1%)  | 140802                                                                                 |
|                                       | Overall          | 2/1432 ( 0.1%)  | 140802, 210111                                                                         |
| Breast abscess                        | 1st year         | 1/1432 ( <0.1%) | 243030                                                                                 |
|                                       | Overall          | 1/1432 ( <0.1%) | 243030                                                                                 |

**Table 14.3.1 / 10: Number of subjects with adverse events including subject identifier and year by treatment (FAS)**

TREATMENT: LCS12

Primary system organ class

| Preferred term<br>MedDRA version 14.0 | YEAR OF<br>ONSET | N (%)           | subject identifier                                                                                                                                                                                                                                                                                                                                                                                                                                                             |
|---------------------------------------|------------------|-----------------|--------------------------------------------------------------------------------------------------------------------------------------------------------------------------------------------------------------------------------------------------------------------------------------------------------------------------------------------------------------------------------------------------------------------------------------------------------------------------------|
| Bronchitis                            | 1st year         | 32/1432 ( 2.2%) | 120403, 120632, 141032, 150108, 150123, 160207, 160434, 160436, 160576, 160610, 160640, 160720, 160924, 160954, 160985, 161532, 200703, 200912, 210411, 240312, 240710, 240715, 241148, 241167, 241185, 241421, 243919, 243941, 243978, 244511, 245701, 245903                                                                                                                                                                                                                 |
|                                       | 2nd year         | 17/1166 ( 1.5%) | 140111, 140301, 150110, 160328, 160576, 160609, 160610, 160910, 160928, 160954, 240337, 240627, 240826, 241113, 243206, 243978, 245531                                                                                                                                                                                                                                                                                                                                         |
|                                       | 3rd year         | 15/ 963 ( 1.6%) | 120401, 120403, 140811, 160416, 160551, 160576, 160623, 160624, 160717, 160729, 161303, 180715, 180735, 240739, 244105                                                                                                                                                                                                                                                                                                                                                         |
|                                       | Overall          | 58/1432 ( 4.1%) | 120401, 120403, 120632, 140111, 140301, 140811, 141032, 150108, 150110, 150123, 160207, 160328, 160416, 160434, 160436, 160551, 160576, 160609, 160610, 160623, 160624, 160640, 160717, 160720, 160729, 160910, 160924, 160928, 160954, 160985, 161303, 161532, 180715, 180735, 200703, 200912, 210411, 240312, 240337, 240627, 240710, 240715, 240739, 240826, 241113, 241148, 241167, 241185, 241421, 243206, 243919, 243941, 243978, 244105, 244511, 245531, 245701, 245903 |
| Bronchitis viral                      | 2nd year         | 1/1166 ( <0.1%) | 160328                                                                                                                                                                                                                                                                                                                                                                                                                                                                         |
|                                       | Overall          | 1/1432 ( <0.1%) | 160328                                                                                                                                                                                                                                                                                                                                                                                                                                                                         |
| Bronchopneumonia                      | 1st year         | 1/1432 ( <0.1%) | 140117                                                                                                                                                                                                                                                                                                                                                                                                                                                                         |
|                                       | Overall          | 1/1432 ( <0.1%) | 140117                                                                                                                                                                                                                                                                                                                                                                                                                                                                         |
| Bursitis infective                    | 1st year         | 1/1432 ( <0.1%) | 160520                                                                                                                                                                                                                                                                                                                                                                                                                                                                         |
|                                       | Overall          | 1/1432 ( <0.1%) | 160520                                                                                                                                                                                                                                                                                                                                                                                                                                                                         |
| Campylobacter infection               | 1st year         | 1/1432 ( <0.1%) | 140817                                                                                                                                                                                                                                                                                                                                                                                                                                                                         |
|                                       | Overall          | 1/1432 ( <0.1%) | 140817                                                                                                                                                                                                                                                                                                                                                                                                                                                                         |

**Table 14.3.1 / 10: Number of subjects with adverse events including subject identifier and year by treatment (FAS)**

| TREATMENT: LCS12           |               |                 |                                                                                        |
|----------------------------|---------------|-----------------|----------------------------------------------------------------------------------------|
| Primary system organ class |               |                 |                                                                                        |
| Preferred term             | YEAR OF ONSET | N (%)           | subject identifier                                                                     |
| MedDRA version 14.0        |               |                 |                                                                                        |
| Candidiasis                | 1st year      | 10/1432 ( 0.7%) | 160323, 160954, 200705, 200910, 230412, 244302, 246104, 246121, 246122, 246125         |
|                            | 2nd year      | 2/1166 ( 0.2%)  | 160954, 200910                                                                         |
|                            | 3rd year      | 1/ 963 ( 0.1%)  | 160328                                                                                 |
|                            | Overall       | 11/1432 ( 0.8%) | 160323, 160328, 160954, 200705, 200910, 230412, 244302, 246104, 246121, 246122, 246125 |
| Cellulitis                 | 1st year      | 1/1432 ( <0.1%) | 120613                                                                                 |
|                            | 2nd year      | 1/1166 ( <0.1%) | 241536                                                                                 |
|                            | 3rd year      | 1/ 963 ( 0.1%)  | 243323                                                                                 |
|                            | Overall       | 3/1432 ( 0.2%)  | 120613, 241536, 243323                                                                 |
| Cervicitis                 | 1st year      | 2/1432 ( 0.1%)  | 190118, 243979                                                                         |
|                            | 2nd year      | 2/1166 ( 0.2%)  | 140605, 245413                                                                         |
|                            | 3rd year      | 1/ 963 ( 0.1%)  | 210125                                                                                 |
|                            | Overall       | 5/1432 ( 0.3%)  | 140605, 190118, 210125, 243979, 245413                                                 |
| Cervicitis gonococcal      | 2nd year      | 1/1166 ( <0.1%) | 244710                                                                                 |
|                            | Overall       | 1/1432 ( <0.1%) | 244710                                                                                 |
| Chlamydial cervicitis      | 1st year      | 1/1432 ( <0.1%) | 243720                                                                                 |
|                            | 2nd year      | 1/1166 ( <0.1%) | 244710                                                                                 |
|                            | Overall       | 2/1432 ( 0.1%)  | 243720, 244710                                                                         |
| Chlamydial infection       | 2nd year      | 1/1166 ( <0.1%) | 244422                                                                                 |
|                            | Overall       | 1/1432 ( <0.1%) | 244422                                                                                 |
| Clitoris abscess           | 3rd year      | 1/ 963 ( 0.1%)  | 210411                                                                                 |
|                            | Overall       | 1/1432 ( <0.1%) | 210411                                                                                 |
| Conjunctivitis bacterial   | 3rd year      | 1/ 963 ( 0.1%)  | 160633                                                                                 |
|                            | Overall       | 1/1432 ( <0.1%) | 160633                                                                                 |
| Conjunctivitis infective   | 1st year      | 2/1432 ( 0.1%)  | 245701, 245911                                                                         |
|                            | Overall       | 2/1432 ( 0.1%)  | 245701, 245911                                                                         |
| Conjunctivitis viral       | 1st year      | 1/1432 ( <0.1%) | 120632                                                                                 |
|                            | Overall       | 1/1432 ( <0.1%) | 120632                                                                                 |

**Table 14.3.1 / 10: Number of subjects with adverse events including subject identifier and year by treatment (FAS)**

TREATMENT: LCS12

Primary system organ class

| Preferred term<br>MedDRA version 14.0 | YEAR OF<br>ONSET | N (%)           | subject identifier                                                                                                                                                                                                                                            |
|---------------------------------------|------------------|-----------------|---------------------------------------------------------------------------------------------------------------------------------------------------------------------------------------------------------------------------------------------------------------|
| Coxsackie viral infection             | 1st year         | 1/1432 ( <0.1%) | 161316                                                                                                                                                                                                                                                        |
|                                       | 2nd year         | 1/1166 ( <0.1%) | 160734                                                                                                                                                                                                                                                        |
|                                       | Overall          | 2/1432 ( 0.1%)  | 160734, 161316                                                                                                                                                                                                                                                |
| Cystitis                              | 1st year         | 20/1432 ( 1.4%) | 120305, 120322, 120401, 140118, 140608, 141416,<br>160402, 160427, 161221, 180120, 180352, 180701,<br>180728, 180733, 190126, 200104, 210203, 230509,<br>243903, 245506                                                                                       |
|                                       | 2nd year         | 8/1166 ( 0.7%)  | 120411, 120630, 141006, 160402, 160952, 161202,<br>170606, 190126                                                                                                                                                                                             |
|                                       | 3rd year         | 6/ 963 ( 0.6%)  | 160402, 180707, 180728, 200601, 200901, 210119                                                                                                                                                                                                                |
|                                       | Overall          | 30/1432 ( 2.1%) | 120305, 120322, 120401, 120411, 120630, 140118,<br>140608, 141006, 141416, 160402, 160427, 160952,<br>161202, 161221, 170606, 180120, 180352, 180701,<br>180707, 180728, 180733, 190126, 200104, 200601,<br>200901,<br>210119, 210203, 230509, 243903, 245506 |
| Dengue fever                          | 1st year         | 1/1432 ( <0.1%) | 160415                                                                                                                                                                                                                                                        |
|                                       | 2nd year         | 1/1166 ( <0.1%) | 190118                                                                                                                                                                                                                                                        |
|                                       | Overall          | 2/1432 ( 0.1%)  | 160415, 190118                                                                                                                                                                                                                                                |
| Diarrhoea infectious                  | 1st year         | 1/1432 ( <0.1%) | 244511                                                                                                                                                                                                                                                        |
|                                       | Overall          | 1/1432 ( <0.1%) | 244511                                                                                                                                                                                                                                                        |
| Diverticulitis                        | 1st year         | 1/1432 ( <0.1%) | 240521                                                                                                                                                                                                                                                        |
|                                       | 2nd year         | 1/1166 ( <0.1%) | 240521                                                                                                                                                                                                                                                        |
|                                       | Overall          | 1/1432 ( <0.1%) | 240521                                                                                                                                                                                                                                                        |

**Table 14.3.1 / 10: Number of subjects with adverse events including subject identifier and year by treatment (FAS)**

TREATMENT: LCS12

Primary system organ class

| Preferred term<br>MedDRA version 14.0 | YEAR OF<br>ONSET | N (%)           | subject identifier                                                                                                                                                                                                     |
|---------------------------------------|------------------|-----------------|------------------------------------------------------------------------------------------------------------------------------------------------------------------------------------------------------------------------|
| Ear infection                         | 1st year         | 15/1432 ( 1.0%) | 120626, 140224, 140811, 150110, 160548, 160564, 160625, 160973, 161203, 200908, 230515, 240520, 240813, 241406, 241536                                                                                                 |
|                                       | 2nd year         | 9/1166 ( 0.8%)  | 160416, 160625, 161308, 200625, 200923, 210136, 243222, 243806, 244426                                                                                                                                                 |
|                                       | 3rd year         | 6/ 963 ( 0.6%)  | 140502, 160416, 160625, 160911, 161316, 243214                                                                                                                                                                         |
|                                       | Overall          | 27/1432 ( 1.9%) | 120626, 140224, 140502, 140811, 150110, 160416, 160548, 160564, 160625, 160911, 160973, 161203, 161308, 161316, 200625, 200908, 200923, 210136, 230515, 240520, 240813, 241406, 241536, 243214, 243222, 243806, 244426 |
| Ear infection bacterial               | 1st year         | 1/1432 ( <0.1%) | 243903                                                                                                                                                                                                                 |
|                                       | Overall          | 1/1432 ( <0.1%) | 243903                                                                                                                                                                                                                 |
| Endometritis                          | 1st year         | 9/1432 ( 0.6%)  | 160434, 160637, 160705, 160732, 180630, 180644, 180668, 230809, 243910                                                                                                                                                 |
|                                       | 2nd year         | 1/1166 ( <0.1%) | 160705                                                                                                                                                                                                                 |
|                                       | 3rd year         | 2/ 963 ( 0.2%)  | 140520, 243012                                                                                                                                                                                                         |
|                                       | Overall          | 11/1432 ( 0.8%) | 140520, 160434, 160637, 160705, 160732, 180630, 180644, 180668, 230809, 243012, 243910                                                                                                                                 |
| Enterobiasis                          | 2nd year         | 1/1166 ( <0.1%) | 161407                                                                                                                                                                                                                 |
|                                       | 3rd year         | 2/ 963 ( 0.2%)  | 160129, 161517                                                                                                                                                                                                         |
|                                       | Overall          | 3/1432 ( 0.2%)  | 160129, 161407, 161517                                                                                                                                                                                                 |
| Enterocolitis infectious              | 1st year         | 1/1432 ( <0.1%) | 120419                                                                                                                                                                                                                 |
|                                       | 2nd year         | 1/1166 ( <0.1%) | 242212                                                                                                                                                                                                                 |
|                                       | Overall          | 2/1432 ( 0.1%)  | 120419, 242212                                                                                                                                                                                                         |
| Erysipelas                            | 2nd year         | 1/1166 ( <0.1%) | 120411                                                                                                                                                                                                                 |
|                                       | Overall          | 1/1432 ( <0.1%) | 120411                                                                                                                                                                                                                 |
| Erythema infectiosum                  | 2nd year         | 1/1166 ( <0.1%) | 140808                                                                                                                                                                                                                 |
|                                       | Overall          | 1/1432 ( <0.1%) | 140808                                                                                                                                                                                                                 |
| Escherichia vaginitis                 | 1st year         | 1/1432 ( <0.1%) | 242307                                                                                                                                                                                                                 |
|                                       | Overall          | 1/1432 ( <0.1%) | 242307                                                                                                                                                                                                                 |



**Table 14.3.1 / 10: Number of subjects with adverse events including subject identifier and year by treatment (FAS)**

TREATMENT: LCS12

Primary system organ class

| Preferred term<br>MedDRA version 14.0 | YEAR OF<br>ONSET | N (%)           | subject identifier                                                                                                                                                                                                                                     |
|---------------------------------------|------------------|-----------------|--------------------------------------------------------------------------------------------------------------------------------------------------------------------------------------------------------------------------------------------------------|
| Eyelid infection                      | 2nd year         | 1/1166 ( <0.1%) | 161018                                                                                                                                                                                                                                                 |
|                                       | Overall          | 1/1432 ( <0.1%) | 161018                                                                                                                                                                                                                                                 |
| Folliculitis                          | 1st year         | 4/1432 ( 0.3%)  | 140113, 140608, 150167, 241606                                                                                                                                                                                                                         |
|                                       | 2nd year         | 1/1166 ( <0.1%) | 160566                                                                                                                                                                                                                                                 |
|                                       | Overall          | 5/1432 ( 0.3%)  | 140113, 140608, 150167, 160566, 241606                                                                                                                                                                                                                 |
| Fungal infection                      | 1st year         | 5/1432 ( 0.3%)  | 160564, 240357, 241185, 241424, 241547                                                                                                                                                                                                                 |
|                                       | Overall          | 5/1432 ( 0.3%)  | 160564, 240357, 241185, 241424, 241547                                                                                                                                                                                                                 |
| Fungal skin infection                 | 1st year         | 1/1432 ( <0.1%) | 230602                                                                                                                                                                                                                                                 |
|                                       | 2nd year         | 2/1166 ( 0.2%)  | 120320, 120411                                                                                                                                                                                                                                         |
|                                       | Overall          | 3/1432 ( 0.2%)  | 120320, 120411, 230602                                                                                                                                                                                                                                 |
| Furuncle                              | 1st year         | 1/1432 ( <0.1%) | 243720                                                                                                                                                                                                                                                 |
|                                       | Overall          | 1/1432 ( <0.1%) | 243720                                                                                                                                                                                                                                                 |
| Gastroenteritis                       | 1st year         | 19/1432 ( 1.3%) | 120315, 120608, 120611, 140114, 140219, 160121, 160129, 160416, 160637, 160757, 160806, 160973, 161109, 161111, 161312, 161408, 200919, 230303, 231012                                                                                                 |
|                                       | 2nd year         | 9/1166 ( 0.8%)  | 120315, 150101, 160110, 160118, 160548, 160952, 161316, 161420, 161424                                                                                                                                                                                 |
|                                       | 3rd year         | 6/ 963 ( 0.6%)  | 120611, 160106, 160712, 160952, 200911, 245911                                                                                                                                                                                                         |
|                                       | Overall          | 31/1432 ( 2.2%) | 120315, 120608, 120611, 140114, 140219, 150101, 160106, 160110, 160118, 160121, 160129, 160416, 160548, 160637, 160712, 160757, 160806, 160952, 160973, 161109, 161111, 161312, 161316, 161408, 161420, 161424, 200911, 200919, 230303, 231012, 245911 |
| Gastroenteritis viral                 | 1st year         | 5/1432 ( 0.3%)  | 240521, 243307, 243309, 243323, 244412                                                                                                                                                                                                                 |
|                                       | 3rd year         | 3/ 963 ( 0.3%)  | 200503, 243323, 243946                                                                                                                                                                                                                                 |
|                                       | Overall          | 7/1432 ( 0.5%)  | 200503, 240521, 243307, 243309, 243323, 243946, 244412                                                                                                                                                                                                 |
| Gastrointestinal viral infection      | 1st year         | 1/1432 ( <0.1%) | 241305                                                                                                                                                                                                                                                 |
|                                       | Overall          | 1/1432 ( <0.1%) | 241305                                                                                                                                                                                                                                                 |

**Table 14.3.1 / 10: Number of subjects with adverse events including subject identifier and year by treatment (FAS)**

TREATMENT: LCS12

Primary system organ class

| Preferred term<br>MedDRA version 14.0 | YEAR OF<br>ONSET | N (%)           | subject identifier                                                             |
|---------------------------------------|------------------|-----------------|--------------------------------------------------------------------------------|
| Genital candidiasis                   | 1st year         | 1/1432 ( <0.1%) | 230908                                                                         |
|                                       | Overall          | 1/1432 ( <0.1%) | 230908                                                                         |
| Genital herpes                        | 1st year         | 4/1432 ( 0.3%)  | 140210, 141026, 161525, 240625                                                 |
|                                       | 2nd year         | 4/1166 ( 0.3%)  | 141026, 160129, 160739, 160928                                                 |
|                                       | 3rd year         | 4/ 963 ( 0.4%)  | 140507, 141026, 160418, 160575                                                 |
|                                       | Overall          | 10/1432 ( 0.7%) | 140210, 140507, 141026, 160129, 160418, 160575, 160739, 160928, 161525, 240625 |
| Genital infection fungal              | 1st year         | 1/1432 ( <0.1%) | 170801                                                                         |
|                                       | Overall          | 1/1432 ( <0.1%) | 170801                                                                         |
| Giardiasis                            | 2nd year         | 1/1166 ( <0.1%) | 160566                                                                         |
|                                       | Overall          | 1/1432 ( <0.1%) | 160566                                                                         |
| Gonorrhoea                            | 2nd year         | 1/1166 ( <0.1%) | 240623                                                                         |
|                                       | Overall          | 1/1432 ( <0.1%) | 240623                                                                         |
| Groin infection                       | 1st year         | 1/1432 ( <0.1%) | 120401                                                                         |
|                                       | 2nd year         | 1/1166 ( <0.1%) | 160567                                                                         |
|                                       | Overall          | 2/1432 ( 0.1%)  | 120401, 160567                                                                 |
| Gynaecological chlamydia infection    | 1st year         | 3/1432 ( 0.2%)  | 140221, 230818, 230908                                                         |
|                                       | Overall          | 3/1432 ( 0.2%)  | 140221, 230818, 230908                                                         |
| H1N1 influenza                        | 2nd year         | 7/1166 ( 0.6%)  | 140111, 160606, 160623, 160631, 160753, 170702, 244508                         |
|                                       | Overall          | 7/1432 ( 0.5%)  | 140111, 160606, 160623, 160631, 160753, 170702, 244508                         |
| Helicobacter gastritis                | 2nd year         | 1/1166 ( <0.1%) | 242907                                                                         |
|                                       | Overall          | 1/1432 ( <0.1%) | 242907                                                                         |
| Helicobacter infection                | 1st year         | 1/1432 ( <0.1%) | 161210                                                                         |
|                                       | Overall          | 1/1432 ( <0.1%) | 161210                                                                         |
| Herpes dermatitis                     | 2nd year         | 1/1166 ( <0.1%) | 245431                                                                         |
|                                       | 3rd year         | 1/ 963 ( 0.1%)  | 245431                                                                         |
|                                       | Overall          | 1/1432 ( <0.1%) | 245431                                                                         |

**Table 14.3.1 / 10: Number of subjects with adverse events including subject identifier and year by treatment (FAS)**

TREATMENT: LCS12

Primary system organ class

| Preferred term<br>MedDRA version 14.0 | YEAR OF<br>ONSET | N (%)           | subject identifier                                     |
|---------------------------------------|------------------|-----------------|--------------------------------------------------------|
| Herpes simplex                        | 3rd year         | 1/ 963 ( 0.1%)  | 241015                                                 |
|                                       | Overall          | 1/1432 ( <0.1%) | 241015                                                 |
| Herpes zoster                         | 1st year         | 3/1432 ( 0.2%)  | 120401, 160404, 244203                                 |
|                                       | 2nd year         | 3/1166 ( 0.3%)  | 160713, 161001, 161425                                 |
|                                       | 3rd year         | 1/ 963 ( 0.1%)  | 230908                                                 |
|                                       | Overall          | 7/1432 ( 0.5%)  | 120401, 160404, 160713, 161001, 161425, 230908, 244203 |
| Impetigo                              | 1st year         | 1/1432 ( <0.1%) | 230223                                                 |
|                                       | 2nd year         | 2/1166 ( 0.2%)  | 160928, 161114                                         |
|                                       | 3rd year         | 1/ 963 ( 0.1%)  | 231005                                                 |
|                                       | Overall          | 4/1432 ( 0.3%)  | 160928, 161114, 230223, 231005                         |
| Infected bites                        | 1st year         | 1/1432 ( <0.1%) | 200709                                                 |
|                                       | 2nd year         | 1/1166 ( <0.1%) | 160924                                                 |
|                                       | Overall          | 2/1432 ( 0.1%)  | 160924, 200709                                         |
| Infectious mononucleosis              | 2nd year         | 1/1166 ( <0.1%) | 200104                                                 |
|                                       | Overall          | 1/1432 ( <0.1%) | 200104                                                 |

**Table 14.3.1 / 10: Number of subjects with adverse events including subject identifier and year by treatment (FAS)**

TREATMENT: LCS12

Primary system organ class

| Preferred term<br>MedDRA version 14.0 | YEAR OF<br>ONSET | N (%)           | subject identifier                                                                                                                                                                                                                                                                                                                                                                                                                                                                                                                                                                             |
|---------------------------------------|------------------|-----------------|------------------------------------------------------------------------------------------------------------------------------------------------------------------------------------------------------------------------------------------------------------------------------------------------------------------------------------------------------------------------------------------------------------------------------------------------------------------------------------------------------------------------------------------------------------------------------------------------|
| Influenza                             | 1st year         | 46/1432 ( 3.2%) | 120305, 120307, 120310, 120315, 120320, 120403, 120409, 120611, 140105, 140117, 140118, 141301, 141421, 160309, 160328, 160525, 160574, 160605, 160610, 160615, 160616, 160617, 160624, 160633, 160637, 161301, 161305, 161313, 161316, 190118, 200506, 200521, 200629, 200703, 210124, 210201, 210409, 230201, 230216, 241307, 241414, 241531, 242316, 242320, 243219, 245528                                                                                                                                                                                                                 |
|                                       | 2nd year         | 27/1166 ( 2.3%) | 120315, 120323, 120604, 150151, 160310, 160525, 160574, 160606, 160613, 160615, 160623, 160624, 160631, 160633, 161313, 161316, 200703, 210409, 231012, 240729, 242320, 242506, 243222, 243231, 244515, 244701, 244934                                                                                                                                                                                                                                                                                                                                                                         |
|                                       | 3rd year         | 14/ 963 ( 1.5%) | 120305, 120623, 150101, 160328, 160427, 160571, 160624, 160625, 160631, 190128, 200115, 200912, 210101, 240710                                                                                                                                                                                                                                                                                                                                                                                                                                                                                 |
|                                       | Overall          | 72/1432 ( 5.0%) | 120305, 120307, 120310, 120315, 120320, 120323, 120403, 120409, 120604, 120611, 120623, 140105, 140117, 140118, 141301, 141421, 150101, 150151, 160309, 160310, 160328, 160427, 160525, 160571, 160574, 160605, 160606, 160610, 160613, 160615, 160616, 160617, 160623, 160624, 160625, 160631, 160633, 160637, 161301, 161305, 161313, 161316, 190118, 190128, 200115, 200506, 200521, 200629, 200703, 200912, 210101, 210124, 210201, 210409, 230201, 230216, 231012, 240710, 240729, 241307, 241414, 241531, 242316, 242320, 242506, 243219, 243222, 243231, 244515, 244701, 244934, 245528 |
| Kidney infection                      | 1st year         | 1/1432 (<0.1%)  | 244427                                                                                                                                                                                                                                                                                                                                                                                                                                                                                                                                                                                         |
|                                       | 2nd year         | 1/1166 (<0.1%)  | 244710                                                                                                                                                                                                                                                                                                                                                                                                                                                                                                                                                                                         |
|                                       | Overall          | 2/1432 ( 0.1%)  | 244427, 244710                                                                                                                                                                                                                                                                                                                                                                                                                                                                                                                                                                                 |
| Labyrinthitis                         | 3rd year         | 1/ 963 ( 0.1%)  | 141032                                                                                                                                                                                                                                                                                                                                                                                                                                                                                                                                                                                         |
|                                       | Overall          | 1/1432 (<0.1%)  | 141032                                                                                                                                                                                                                                                                                                                                                                                                                                                                                                                                                                                         |

**Table 14.3.1 / 10: Number of subjects with adverse events including subject identifier and year by treatment (FAS)**

TREATMENT: LCS12

Primary system organ class

| Preferred term<br>MedDRA version 14.0       | YEAR OF<br>ONSET | N (%)           | subject identifier                                     |
|---------------------------------------------|------------------|-----------------|--------------------------------------------------------|
| Laryngitis                                  | 1st year         | 1/1432 ( <0.1%) | 200516                                                 |
|                                             | 2nd year         | 5/1166 ( 0.4%)  | 140511, 140519, 140811, 141412, 150123                 |
|                                             | 3rd year         | 1/ 963 ( 0.1%)  | 245531                                                 |
|                                             | Overall          | 7/1432 ( 0.5%)  | 140511, 140519, 140811, 141412, 150123, 200516, 245531 |
| Localised infection                         | 1st year         | 1/1432 ( <0.1%) | 243510                                                 |
|                                             | 2nd year         | 2/1166 ( 0.2%)  | 160905, 244427                                         |
|                                             | 3rd year         | 1/ 963 ( 0.1%)  | 246212                                                 |
|                                             | Overall          | 4/1432 ( 0.3%)  | 160905, 243510, 244427, 246212                         |
| Lower respiratory tract infection           | 1st year         | 2/1432 ( 0.1%)  | 140215, 244306                                         |
|                                             | 2nd year         | 1/1166 ( <0.1%) | 244310                                                 |
|                                             | Overall          | 3/1432 ( 0.2%)  | 140215, 244306, 244310                                 |
| Lower respiratory tract infection bacterial | 3rd year         | 1/ 963 ( 0.1%)  | 242506                                                 |
|                                             | Overall          | 1/1432 ( <0.1%) | 242506                                                 |
| Lymph gland infection                       | 3rd year         | 1/ 963 ( 0.1%)  | 245506                                                 |
|                                             | Overall          | 1/1432 ( <0.1%) | 245506                                                 |
| Malaria                                     | 1st year         | 1/1432 ( <0.1%) | 161018                                                 |
|                                             | Overall          | 1/1432 ( <0.1%) | 161018                                                 |
| Mastitis                                    | 1st year         | 1/1432 ( <0.1%) | 140518                                                 |
|                                             | 3rd year         | 2/ 963 ( 0.2%)  | 120305, 160701                                         |
|                                             | Overall          | 3/1432 ( 0.2%)  | 120305, 140518, 160701                                 |
| Meningitis                                  | 1st year         | 1/1432 ( <0.1%) | 160329                                                 |
|                                             | Overall          | 1/1432 ( <0.1%) | 160329                                                 |
| Nail infection                              | 1st year         | 1/1432 ( <0.1%) | 160722                                                 |
|                                             | 3rd year         | 1/ 963 ( 0.1%)  | 244412                                                 |
|                                             | Overall          | 2/1432 ( 0.1%)  | 160722, 244412                                         |

**Table 14.3.1 / 10: Number of subjects with adverse events including subject identifier and year by treatment (FAS)**

TREATMENT: LCS12

Primary system organ class

| Preferred term<br>MedDRA version 14.0 | YEAR OF<br>ONSET | N (%)            | subject identifier                                                                                                                                                                                                                                                                                                                                                                                                                                                                                                                                                                                                      |
|---------------------------------------|------------------|------------------|-------------------------------------------------------------------------------------------------------------------------------------------------------------------------------------------------------------------------------------------------------------------------------------------------------------------------------------------------------------------------------------------------------------------------------------------------------------------------------------------------------------------------------------------------------------------------------------------------------------------------|
| Nasopharyngitis                       | 1st year         | 70/1432 ( 4.9%)  | 120608, 120610, 140111, 140113, 140116, 140228, 140515, 140808, 140817, 140905, 140911, 140921, 141405, 150108, 150149, 150163, 150166, 150168, 160105, 160106, 160108, 160129, 160720, 160757, 160801, 160806, 161305, 161322, 161517, 180703, 180705, 180707, 180734, 180735, 200521, 200911, 210119, 230115, 230120, 230216, 230303, 230314, 230401, 230607, 230713, 230714, 230809, 230816, 230819, 230824, 231012, 231108, 241159, 241307, 241553, 241807, 242313, 242316, 242504, 242906, 243206, 243213, 243919, 243948, 244127, 244518, 244707, 244711, 244909, 245506                                          |
|                                       | 2nd year         | 35/1166 ( 3.0%)  | 120310, 120329, 120611, 140105, 140111, 140218, 140228, 140510, 150151, 150156, 160108, 160118, 160806, 161104, 161305, 161313, 161316, 161322, 210119, 210120, 210201, 210404, 230314, 230318, 230603, 230607, 230819, 231102, 231108, 242504, 242902, 243204, 244105, 244412, 245506                                                                                                                                                                                                                                                                                                                                  |
|                                       | 3rd year         | 21/ 963 ( 2.2%)  | 120326, 120610, 140116, 140518, 140808, 140811, 150123, 150142, 161012, 161305, 161313, 161316, 200521, 200911, 210116, 230114, 230223, 230602, 230819, 243946, 245506                                                                                                                                                                                                                                                                                                                                                                                                                                                  |
|                                       | Overall          | 103/1432 ( 7.2%) | 120310, 120326, 120329, 120608, 120610, 120611, 140105, 140111, 140113, 140116, 140218, 140228, 140510, 140515, 140518, 140808, 140811, 140817, 140905, 140911, 140921, 141405, 150108, 150123, 150142, 150149, 150151, 150156, 150163, 150166, 150168, 160105, 160106, 160108, 160118, 160129, 160720, 160757, 160801, 160806, 161012, 161104, 161305, 161313, 161316, 161322, 161517, 180703, 180705, 180707, 180734, 180735, 200521, 200911, 210116, 210119, 210120, 210201, 210404, 230114, 230115, 230120, 230216, 230223, 230303, 230314, 230318, 230401, 230602, 230603, 230607, 230713, 230714, 230809, 230816, |

**Table 14.3.1 / 10: Number of subjects with adverse events including subject identifier and year by treatment (FAS)**

| TREATMENT: LCS12            |               |                 |                                                                                                                                                                                                                                |
|-----------------------------|---------------|-----------------|--------------------------------------------------------------------------------------------------------------------------------------------------------------------------------------------------------------------------------|
| Primary system organ class  |               |                 |                                                                                                                                                                                                                                |
| Preferred term              | YEAR OF ONSET |                 | subject identifier                                                                                                                                                                                                             |
| MedDRA version 14.0         |               | N (%)           |                                                                                                                                                                                                                                |
|                             |               |                 | 230819, 230824, 231012, 231102, 231108, 241159, 241307, 241553, 241807, 242313, 242316, 242504, 242902, 242906, 243204, 243206, 243213, 243919, 243946, 243948, 244105, 244127, 244412, 244518, 244707, 244711, 244909, 245506 |
| Onychomycosis               | 1st year      | 2/1432 ( 0.1%)  | 120412, 161411                                                                                                                                                                                                                 |
|                             | 3rd year      | 1/ 963 ( 0.1%)  | 200528                                                                                                                                                                                                                         |
|                             | Overall       | 3/1432 ( 0.2%)  | 120412, 161411, 200528                                                                                                                                                                                                         |
| Oral herpes                 | 1st year      | 6/1432 ( 0.4%)  | 140116, 150166, 160208, 161205, 210136, 244125                                                                                                                                                                                 |
|                             | 2nd year      | 3/1166 ( 0.3%)  | 120611, 160967, 241421                                                                                                                                                                                                         |
|                             | 3rd year      | 3/ 963 ( 0.3%)  | 120602, 140228, 241421                                                                                                                                                                                                         |
|                             | Overall       | 11/1432 ( 0.8%) | 120602, 120611, 140116, 140228, 150166, 160208, 160967, 161205, 210136, 241421, 244125                                                                                                                                         |
| Otitis media                | 1st year      | 3/1432 ( 0.2%)  | 160217, 161202, 244408                                                                                                                                                                                                         |
|                             | 2nd year      | 1/1166 ( <0.1%) | 161225                                                                                                                                                                                                                         |
|                             | 3rd year      | 2/ 963 ( 0.2%)  | 160217, 160551                                                                                                                                                                                                                 |
|                             | Overall       | 5/1432 ( 0.3%)  | 160217, 160551, 161202, 161225, 244408                                                                                                                                                                                         |
| Papilloma viral infection   | 1st year      | 2/1432 ( 0.1%)  | 161514, 161525                                                                                                                                                                                                                 |
|                             | Overall       | 2/1432 ( 0.1%)  | 161514, 161525                                                                                                                                                                                                                 |
| Parasitic gastroenteritis   | 1st year      | 1/1432 ( <0.1%) | 190216                                                                                                                                                                                                                         |
|                             | Overall       | 1/1432 ( <0.1%) | 190216                                                                                                                                                                                                                         |
| Paronychia                  | 2nd year      | 1/1166 ( <0.1%) | 160416                                                                                                                                                                                                                         |
|                             | Overall       | 1/1432 ( <0.1%) | 160416                                                                                                                                                                                                                         |
| Pelvic inflammatory disease | 1st year      | 2/1432 ( 0.1%)  | 140221, 244438                                                                                                                                                                                                                 |
|                             | 2nd year      | 1/1166 ( <0.1%) | 243220                                                                                                                                                                                                                         |
|                             | 3rd year      | 2/ 963 ( 0.2%)  | 180116, 180618                                                                                                                                                                                                                 |
|                             | Overall       | 5/1432 ( 0.3%)  | 140221, 180116, 180618, 243220, 244438                                                                                                                                                                                         |
| Peritoneal abscess          | 2nd year      | 1/1166 ( <0.1%) | 160973                                                                                                                                                                                                                         |
|                             | Overall       | 1/1432 ( <0.1%) | 160973                                                                                                                                                                                                                         |

**Table 14.3.1 / 10: Number of subjects with adverse events including subject identifier and year by treatment (FAS)**

TREATMENT: LCS12

Primary system organ class

| Preferred term<br>MedDRA version 14.0 | YEAR OF<br>ONSET | N (%)           | subject identifier                                                                                                                                                                     |
|---------------------------------------|------------------|-----------------|----------------------------------------------------------------------------------------------------------------------------------------------------------------------------------------|
| Peritonsillar abscess                 | 1st year         | 2/1432 ( 0.1%)  | 160904, 244613                                                                                                                                                                         |
|                                       | Overall          | 2/1432 ( 0.1%)  | 160904, 244613                                                                                                                                                                         |
| Pharyngeal abscess                    | 3rd year         | 1/ 963 ( 0.1%)  | 160729                                                                                                                                                                                 |
|                                       | Overall          | 1/1432 ( <0.1%) | 160729                                                                                                                                                                                 |
| Pharyngitis                           | 1st year         | 8/1432 ( 0.6%)  | 120417, 120610, 120611, 120632, 140210, 160749, 180733, 244425                                                                                                                         |
|                                       | 2nd year         | 3/1166 ( 0.3%)  | 150123, 243320, 245803                                                                                                                                                                 |
|                                       | 3rd year         | 2/ 963 ( 0.2%)  | 140502, 244430                                                                                                                                                                         |
|                                       | Overall          | 13/1432 ( 0.9%) | 120417, 120610, 120611, 120632, 140210, 140502, 150123, 160749, 180733, 243320, 244425, 244430, 245803                                                                                 |
| Pharyngitis streptococcal             | 1st year         | 11/1432 ( 0.8%) | 140224, 240115, 240516, 241110, 241202, 243903, 243978, 244422, 244447, 245502, 246125                                                                                                 |
|                                       | 2nd year         | 6/1166 ( 0.5%)  | 140703, 141004, 240739, 243502, 244443, 244610                                                                                                                                         |
|                                       | 3rd year         | 7/ 963 ( 0.7%)  | 240726, 240739, 241548, 242818, 243206, 243222, 243913                                                                                                                                 |
|                                       | Overall          | 23/1432 ( 1.6%) | 140224, 140703, 141004, 240115, 240516, 240726, 240739, 241110, 241202, 241548, 242818, 243206, 243222, 243502, 243903, 243913, 243978, 244422, 244443, 244447, 244610, 245502, 246125 |
| Pharyngotonsillitis                   | 3rd year         | 1/ 963 ( 0.1%)  | 150166                                                                                                                                                                                 |
|                                       | Overall          | 1/1432 ( <0.1%) | 150166                                                                                                                                                                                 |
| Pilonidal cyst                        | 2nd year         | 1/1166 ( <0.1%) | 245516                                                                                                                                                                                 |
|                                       | Overall          | 1/1432 ( <0.1%) | 245516                                                                                                                                                                                 |
| Pneumonia                             | 1st year         | 7/1432 ( 0.5%)  | 120315, 140113, 140507, 160129, 200501, 230604, 230809                                                                                                                                 |
|                                       | 2nd year         | 3/1166 ( 0.3%)  | 160623, 161003, 241113                                                                                                                                                                 |
|                                       | 3rd year         | 4/ 963 ( 0.4%)  | 120619, 160551, 180420, 244707                                                                                                                                                         |
|                                       | Overall          | 14/1432 ( 1.0%) | 120315, 120619, 140113, 140507, 160129, 160551, 160623, 161003, 180420, 200501, 230604, 230809, 241113, 244707                                                                         |
| Pneumonia mycoplasmal                 | 2nd year         | 1/1166 ( <0.1%) | 210411                                                                                                                                                                                 |
|                                       | Overall          | 1/1432 ( <0.1%) | 210411                                                                                                                                                                                 |



**Table 14.3.1 / 10: Number of subjects with adverse events including subject identifier and year by treatment (FAS)**

| TREATMENT: LCS12                  |               |                 |                                                                                |
|-----------------------------------|---------------|-----------------|--------------------------------------------------------------------------------|
| Primary system organ class        |               |                 |                                                                                |
| Preferred term                    | YEAR OF ONSET | N (%)           | subject identifier                                                             |
| MedDRA version 14.0               |               |                 |                                                                                |
| Pogosta disease                   | 2nd year      | 1/1166 ( <0.1%) | 161017                                                                         |
|                                   | Overall       | 1/1432 ( <0.1%) | 161017                                                                         |
| Post procedural infection         | 1st year      | 3/1432 ( 0.2%)  | 120326, 200519, 200709                                                         |
|                                   | Overall       | 3/1432 ( 0.2%)  | 120326, 200519, 200709                                                         |
| Pyelonephritis                    | 1st year      | 6/1432 ( 0.4%)  | 140118, 141013, 141109, 200705, 200901, 241410                                 |
|                                   | 2nd year      | 3/1166 ( 0.3%)  | 170406, 241725, 242807                                                         |
|                                   | Overall       | 9/1432 ( 0.6%)  | 140118, 141013, 141109, 170406, 200705, 200901, 241410, 241725, 242807         |
| Pyelonephritis acute              | 1st year      | 1/1432 ( <0.1%) | 161512                                                                         |
|                                   | 3rd year      | 1/ 963 ( 0.1%)  | 161403                                                                         |
|                                   | Overall       | 2/1432 ( 0.1%)  | 161403, 161512                                                                 |
| Q fever                           | 2nd year      | 1/1166 ( <0.1%) | 200519                                                                         |
|                                   | Overall       | 1/1432 ( <0.1%) | 200519                                                                         |
| Respiratory tract infection       | 1st year      | 6/1432 ( 0.4%)  | 160129, 160746, 160749, 161215, 161532, 161537                                 |
|                                   | 2nd year      | 5/1166 ( 0.4%)  | 160729, 160738, 161203, 161205, 161215                                         |
|                                   | Overall       | 10/1432 ( 0.7%) | 160129, 160729, 160738, 160746, 160749, 161203, 161205, 161215, 161532, 161537 |
| Respiratory tract infection viral | 3rd year      | 2/ 963 ( 0.2%)  | 243320, 243325                                                                 |
|                                   | Overall       | 2/1432 ( 0.1%)  | 243320, 243325                                                                 |
| Rhinitis                          | 1st year      | 6/1432 ( 0.4%)  | 120412, 120611, 160415, 160616, 180736, 180740                                 |
|                                   | Overall       | 6/1432 ( 0.4%)  | 120412, 120611, 160415, 160616, 180736, 180740                                 |
| Salpingitis                       | 2nd year      | 1/1166 ( <0.1%) | 161027                                                                         |
|                                   | Overall       | 1/1432 ( <0.1%) | 161027                                                                         |
| Salpingo-oophoritis               | 1st year      | 2/1432 ( 0.1%)  | 150104, 180140                                                                 |
|                                   | Overall       | 2/1432 ( 0.1%)  | 150104, 180140                                                                 |
| Sialoadenitis                     | 1st year      | 1/1432 ( <0.1%) | 140111                                                                         |
|                                   | 2nd year      | 1/1166 ( <0.1%) | 140111                                                                         |
|                                   | Overall       | 1/1432 ( <0.1%) | 140111                                                                         |

**Table 14.3.1 / 10: Number of subjects with adverse events including subject identifier and year by treatment (FAS)**

TREATMENT: LCS12

Primary system organ class

Preferred term

MedDRA version 14.0

|           | YEAR OF ONSET | N (%)           | subject identifier                                                                                                                                                                                                                                                                                                                                                                                                                                                                                                                                                                                                                                                                                                                             |
|-----------|---------------|-----------------|------------------------------------------------------------------------------------------------------------------------------------------------------------------------------------------------------------------------------------------------------------------------------------------------------------------------------------------------------------------------------------------------------------------------------------------------------------------------------------------------------------------------------------------------------------------------------------------------------------------------------------------------------------------------------------------------------------------------------------------------|
| Sinusitis | 1st year      | 55/1432 ( 3.8%) | 120401, 140113, 140301, 150156, 160129, 160305, 160320, 160321, 160328, 160404, 160541, 160548, 160566, 160572, 160613, 160626, 160721, 160725, 161026, 161221, 161440, 170606, 180652, 180733, 200523, 210203, 230515, 230809, 231012, 240525, 240644, 241110, 241185, 241305, 241406, 241414, 241424, 241536, 241553, 241717, 241718, 242313, 243220, 243222, 243323, 243325, 243327, 243904, 243914, 243919, 243965, 243969, 243978, 244203, 244711                                                                                                                                                                                                                                                                                         |
|           | 2nd year      | 33/1166 ( 2.8%) | 140116, 140519, 160320, 160328, 160434, 160576, 160610, 160613, 160615, 160616, 160721, 161015, 161221, 161532, 180673, 200625, 231107, 241536, 241708, 241712, 243220, 243222, 243308, 243309, 243323, 243325, 243913, 243914, 244430, 245502, 245701, 245910, 245933                                                                                                                                                                                                                                                                                                                                                                                                                                                                         |
|           | 3rd year      | 26/ 963 ( 2.7%) | 140116, 140811, 141032, 160127, 160320, 160328, 160576, 160606, 160613, 160631, 160949, 161203, 161205, 161219, 161221, 161414, 200625, 210203, 231012, 240627, 241708, 243219, 243904, 244430, 245701, 245709                                                                                                                                                                                                                                                                                                                                                                                                                                                                                                                                 |
|           | Overall       | 90/1432 ( 6.3%) | 120401, 140113, 140116, 140301, 140519, 140811, 141032, 150156, 160127, 160129, 160305, 160320, 160321, 160328, 160404, 160434, 160541, 160548, 160566, 160572, 160576, 160606, 160610, 160613, 160615, 160616, 160626, 160631, 160721, 160725, 160949, 161015, 161026, 161203, 161205, 161219, 161221, 161414, 161440, 161532, 170606, 180652, 180673, 180733, 200523, 200625, 210203, 230515, 230809, 231012, 231107, 240525, 240627, 240644, 241110, 241185, 241305, 241406, 241414, 241424, 241536, 241553, 241708, 241712, 241717, 241718, 242313, 243219, 243220, 243222, 243308, 243309, 243323, 243325, 243327, 243904, 243913, 243914, 243919, 243965, 243969, 243978, 244203, 244430, 244711, 245502, 245701, 245709, 245910, 245933 |

**Table 14.3.1 / 10: Number of subjects with adverse events including subject identifier and year by treatment (FAS)**

TREATMENT: LCS12

Primary system organ class

| Preferred term<br>MedDRA version 14.0 | YEAR OF<br>ONSET | N (%)           | subject identifier     |
|---------------------------------------|------------------|-----------------|------------------------|
| Skin bacterial infection              | 3rd year         | 1/ 963 ( 0.1%)  | 160754                 |
|                                       | Overall          | 1/1432 ( <0.1%) | 160754                 |
| Skin candida                          | 3rd year         | 1/ 963 ( 0.1%)  | 244127                 |
|                                       | Overall          | 1/1432 ( <0.1%) | 244127                 |
| Skin infection                        | 1st year         | 1/1432 ( <0.1%) | 160113                 |
|                                       | Overall          | 1/1432 ( <0.1%) | 160113                 |
| Staphylococcal infection              | 1st year         | 1/1432 ( <0.1%) | 243510                 |
|                                       | Overall          | 1/1432 ( <0.1%) | 243510                 |
| Staphylococcal skin infection         | 1st year         | 1/1432 ( <0.1%) | 244417                 |
|                                       | Overall          | 1/1432 ( <0.1%) | 244417                 |
| Streptococcal infection               | 2nd year         | 1/1166 ( <0.1%) | 120632                 |
|                                       | Overall          | 1/1432 ( <0.1%) | 120632                 |
| Streptococcal sepsis                  | 2nd year         | 1/1166 ( <0.1%) | 244602                 |
|                                       | Overall          | 1/1432 ( <0.1%) | 244602                 |
| Subcutaneous abscess                  | 1st year         | 2/1432 ( 0.1%)  | 120403, 241548         |
|                                       | 2nd year         | 1/1166 ( <0.1%) | 241548                 |
|                                       | 3rd year         | 1/ 963 ( 0.1%)  | 120307                 |
|                                       | Overall          | 3/1432 ( 0.2%)  | 120307, 120403, 241548 |
| Sweat gland infection                 | 1st year         | 1/1432 ( <0.1%) | 160547                 |
|                                       | Overall          | 1/1432 ( <0.1%) | 160547                 |
| Tinea infection                       | 1st year         | 1/1432 ( <0.1%) | 230217                 |
|                                       | Overall          | 1/1432 ( <0.1%) | 230217                 |
| Tinea pedis                           | 3rd year         | 1/ 963 ( 0.1%)  | 200528                 |
|                                       | Overall          | 1/1432 ( <0.1%) | 200528                 |

**Table 14.3.1 / 10: Number of subjects with adverse events including subject identifier and year by treatment (FAS)**

| TREATMENT: LCS12           |               |                 |                                                                                                                                                                                                        |
|----------------------------|---------------|-----------------|--------------------------------------------------------------------------------------------------------------------------------------------------------------------------------------------------------|
| Primary system organ class |               |                 |                                                                                                                                                                                                        |
| Preferred term             | YEAR OF ONSET | N (%)           | subject identifier                                                                                                                                                                                     |
| MedDRA version 14.0        |               |                 |                                                                                                                                                                                                        |
| Tonsillitis                | 1st year      | 15/1432 ( 1.0%) | 120626, 140212, 150123, 150142, 150143, 160402, 160555, 160610, 160617, 160633, 180501, 230607, 230713, 241805, 245508                                                                                 |
|                            | 2nd year      | 9/1166 ( 0.8%)  | 120632, 141004, 150143, 160566, 160633, 160701, 160729, 161517, 180630                                                                                                                                 |
|                            | 3rd year      | 6/ 963 ( 0.6%)  | 120619, 120632, 150143, 160625, 160633, 180645                                                                                                                                                         |
|                            | Overall       | 25/1432 ( 1.7%) | 120619, 120626, 120632, 140212, 141004, 150123, 150142, 150143, 160402, 160555, 160566, 160610, 160617, 160625, 160633, 160701, 160729, 161517, 180501, 180630, 180645, 230607, 230713, 241805, 245508 |
| Tonsillitis streptococcal  | 2nd year      | 1/1166 ( <0.1%) | 160952                                                                                                                                                                                                 |
|                            | 3rd year      | 1/ 963 ( 0.1%)  | 160952                                                                                                                                                                                                 |
|                            | Overall       | 1/1432 ( <0.1%) | 160952                                                                                                                                                                                                 |
| Tooth abscess              | 1st year      | 5/1432 ( 0.3%)  | 140113, 140502, 241718, 244132, 244618                                                                                                                                                                 |
|                            | Overall       | 5/1432 ( 0.3%)  | 140113, 140502, 241718, 244132, 244618                                                                                                                                                                 |
| Tooth infection            | 1st year      | 11/1432 ( 0.8%) | 160119, 160205, 160613, 160705, 160758, 160949, 160967, 161117, 161539, 180652, 243712                                                                                                                 |
|                            | 2nd year      | 4/1166 ( 0.3%)  | 120307, 160538, 161221, 243611                                                                                                                                                                         |
|                            | 3rd year      | 10/ 963 ( 1.0%) | 120613, 150167, 160539, 160928, 161017, 161303, 161517, 242812, 243806, 245916                                                                                                                         |
|                            | Overall       | 25/1432 ( 1.7%) | 120307, 120613, 150167, 160119, 160205, 160538, 160539, 160613, 160705, 160758, 160928, 160949, 160967, 161017, 161117, 161221, 161303, 161517, 161539, 180652, 242812, 243611, 243712, 243806, 245916 |
| Tracheitis                 | 1st year      | 1/1432 ( <0.1%) | 140114                                                                                                                                                                                                 |
|                            | Overall       | 1/1432 ( <0.1%) | 140114                                                                                                                                                                                                 |
| Trichomoniasis             | 1st year      | 1/1432 ( <0.1%) | 246132                                                                                                                                                                                                 |
|                            | 2nd year      | 1/1166 ( <0.1%) | 241547                                                                                                                                                                                                 |
|                            | Overall       | 2/1432 ( 0.1%)  | 241547, 246132                                                                                                                                                                                         |
| Tuberculosis               | 3rd year      | 1/ 963 ( 0.1%)  | 120321                                                                                                                                                                                                 |
|                            | Overall       | 1/1432 ( <0.1%) | 120321                                                                                                                                                                                                 |

**Table 14.3.1 / 10: Number of subjects with adverse events including subject identifier and year by treatment (FAS)**

TREATMENT: LCS12

Primary system organ class

| Preferred term<br>MedDRA version 14.0 | YEAR OF<br>ONSET | N (%)           | subject identifier                                                                                                                                                                                                                                                                                                                                                                                                     |
|---------------------------------------|------------------|-----------------|------------------------------------------------------------------------------------------------------------------------------------------------------------------------------------------------------------------------------------------------------------------------------------------------------------------------------------------------------------------------------------------------------------------------|
| Tubo-ovarian abscess                  | 1st year         | 1/1432 ( <0.1%) | 244438                                                                                                                                                                                                                                                                                                                                                                                                                 |
|                                       | Overall          | 1/1432 ( <0.1%) | 244438                                                                                                                                                                                                                                                                                                                                                                                                                 |
| Upper respiratory tract infection     | 1st year         | 31/1432 ( 2.2%) | 141104, 161015, 161017, 161026, 180619, 180624, 230917, 241238, 241307, 241405, 241414, 243206, 243307, 243322, 243323, 243327, 243720, 244125, 244402, 244407, 244408, 244412, 244422, 244426, 244447, 244504, 244508, 244515, 244523, 244604, 245702                                                                                                                                                                 |
|                                       | 2nd year         | 16/1166 ( 1.4%) | 140808, 161001, 161015, 161023, 180604, 180624, 180644, 240521, 241531, 242805, 243314, 243322, 244508, 244602, 244608, 244618                                                                                                                                                                                                                                                                                         |
|                                       | 3rd year         | 13/ 963 ( 1.3%) | 140807, 160119, 161001, 161015, 161017, 161023, 230216, 241302, 241305, 242510, 243206, 244607, 244707                                                                                                                                                                                                                                                                                                                 |
|                                       | Overall          | 51/1432 ( 3.6%) | 140807, 140808, 141104, 160119, 161001, 161015, 161017, 161023, 161026, 180604, 180619, 180624, 180644, 230216, 230917, 240521, 241238, 241302, 241305, 241307, 241405, 241414, 241531, 242510, 242805, 243206, 243307, 243314, 243322, 243323, 243327, 243720, 244125, 244402, 244407, 244408, 244412, 244422, 244426, 244447, 244504, 244508, 244515, 244523, 244602, 244604, 244607, 244608, 244618, 244707, 245702 |
| Ureaplasma infection                  | 2nd year         | 1/1166 ( <0.1%) | 150104                                                                                                                                                                                                                                                                                                                                                                                                                 |
|                                       | Overall          | 1/1432 ( <0.1%) | 150104                                                                                                                                                                                                                                                                                                                                                                                                                 |

**Table 14.3.1 / 10: Number of subjects with adverse events including subject identifier and year by treatment (FAS)**

TREATMENT: LCS12

| Primary system organ class | YEAR OF ONSET | N (%)             | subject identifier                                                                                                                                                                                                                                                                                                                                                                                                                                                                                                                                                                                                                                                                                                                                                             |
|----------------------------|---------------|-------------------|--------------------------------------------------------------------------------------------------------------------------------------------------------------------------------------------------------------------------------------------------------------------------------------------------------------------------------------------------------------------------------------------------------------------------------------------------------------------------------------------------------------------------------------------------------------------------------------------------------------------------------------------------------------------------------------------------------------------------------------------------------------------------------|
| Preferred term             |               |                   |                                                                                                                                                                                                                                                                                                                                                                                                                                                                                                                                                                                                                                                                                                                                                                                |
| MedDRA version 14.0        |               |                   |                                                                                                                                                                                                                                                                                                                                                                                                                                                                                                                                                                                                                                                                                                                                                                                |
| Urinary tract infection    | 1st year      | 94/1432 ( 6.6%)   | 120201, 120307, 120611, 120619, 120626, 120632, 140228, 141004, 141022, 141109, 150104, 150125, 150128, 150143, 150163, 160402, 160425, 160506, 160515, 160520, 160539, 160547, 160548, 160564, 160571, 160623, 160626, 160712, 160736, 160743, 160806, 160910, 160952, 160967, 161012, 161023, 161127, 161304, 161511, 170406, 180630, 180643, 180662, 190118, 190204, 190205, 210124, 210125, 210404, 210411, 230103, 230115, 230310, 230501, 230603, 231009, 231112, 240131, 240217, 240520, 240617, 240716, 240904, 241009, 241128, 241142, 241167, 241228, 241231, 241307, 241410, 241545, 242204, 242315, 242712, 242714, 243103, 243220, 243224, 243308, 243320, 243814, 243830, 243950, 243972, 244125, 244425, 244427, 244447, 244701, 245014, 245439, 245525, 245929 |
|                            | 2nd year      | 42/1166 ( 3.6%)   | 120321, 120330, 140302, 140518, 141106, 141402, 141423, 150104, 150110, 150149, 160566, 160571, 161003, 161012, 161017, 161215, 161218, 161322, 161440, 170101, 170406, 180676, 210136, 230603, 230818, 240209, 240326, 240715, 241130, 241231, 241302, 241525, 241708, 242316, 243307, 243502, 243904, 243943, 243972, 244408, 244602, 244934                                                                                                                                                                                                                                                                                                                                                                                                                                 |
|                            | 3rd year      | 43/ 963 ( 4.5%)   | 120119, 120307, 120310, 120321, 120417, 120619, 150104, 150506, 160102, 160113, 160201, 160218, 160571, 160616, 160705, 160712, 160911, 161001, 161109, 161127, 161203, 161218, 161219, 161221, 161303, 161440, 170404, 230401, 230908, 231016, 241009, 241128, 241142, 241149, 241185, 241302, 241421, 241736, 244425, 244523, 244707, 244914, 246214                                                                                                                                                                                                                                                                                                                                                                                                                         |
|                            | Overall       | 158/1432 ( 11.0%) | 120119, 120201, 120307, 120310, 120321, 120330, 120417, 120611, 120619, 120626, 120632, 140228, 140302, 140518, 141004, 141022, 141106, 141109, 141402, 141423, 150104, 150110, 150125, 150128, 150143,                                                                                                                                                                                                                                                                                                                                                                                                                                                                                                                                                                        |

**Table 14.3.1 / 10: Number of subjects with adverse events including subject identifier and year by treatment (FAS)**

TREATMENT: LCS12

Primary system organ class

Preferred term

MedDRA version 14.0

YEAR OF

ONSET

N (%)

subject identifier

150149, 150163, 150506, 160102, 160113, 160201,  
 160218, 160402, 160425, 160506, 160515, 160520,  
 160539, 160547, 160548, 160564, 160566, 160571,  
 160616, 160623, 160626, 160705, 160712, 160736,  
 160743,  
 160806, 160910, 160911, 160952, 160967, 161001,  
 161003, 161012, 161017, 161023, 161109, 161127,  
 161203, 161215, 161218, 161219, 161221, 161303,  
 161304, 161322, 161440, 161511, 170101, 170404,  
 170406,  
 180630, 180643, 180662, 180676, 190118, 190204,  
 190205, 210124, 210125, 210136, 210404, 210411,  
 230103, 230115, 230310, 230401, 230501, 230603,  
 230818, 230908, 231009, 231016, 231112, 240131,  
 240209,  
 240217, 240326, 240520, 240617, 240715, 240716,  
 240904, 241009, 241128, 241130, 241142, 241149,  
 241167, 241185, 241228, 241231, 241302, 241307,  
 241410, 241421, 241525, 241545, 241708, 241736,  
 242204,  
 242315, 242316, 242712, 242714, 243103, 243220,  
 243224, 243307, 243308, 243320, 243502, 243814,  
 243830, 243904, 243943, 243950, 243972, 244125,  
 244408, 244425, 244427, 244447, 244523, 244602,  
 244701,  
 244707, 244914, 244934, 245014, 245439, 245525,  
 245929, 246214

**Table 14.3.1 / 10: Number of subjects with adverse events including subject identifier and year by treatment (FAS)**

TREATMENT: LCS12

| Primary system organ class | Preferred term    | MedDRA version 14.0 | YEAR OF ONSET | N (%)           | subject identifier                                                                                                                                                                                                                                                                                                                                                                             |
|----------------------------|-------------------|---------------------|---------------|-----------------|------------------------------------------------------------------------------------------------------------------------------------------------------------------------------------------------------------------------------------------------------------------------------------------------------------------------------------------------------------------------------------------------|
|                            | Vaginal infection |                     | 1st year      | 28/1432 ( 2.0%) | 140113, 140502, 140511, 140905, 160205, 160522, 160536, 160571, 160601, 160615, 160633, 161225, 161303, 161540, 180136, 180705, 180733, 190132, 190135, 190140, 190203, 190412, 190418, 240366, 242805, 242818, 243118, 246104                                                                                                                                                                 |
|                            |                   |                     | 2nd year      | 20/1166 ( 1.7%) | 140518, 141013, 141022, 160102, 160201, 160207, 160538, 160571, 160623, 160625, 160633, 180503, 180733, 190126, 190132, 190216, 210124, 242315, 242906, 243907                                                                                                                                                                                                                                 |
|                            |                   |                     | 3rd year      | 6/ 963 ( 0.6%)  | 140302, 141011, 160555, 160623, 160625, 240828                                                                                                                                                                                                                                                                                                                                                 |
|                            |                   |                     | Overall       | 48/1432 ( 3.4%) | 140113, 140302, 140502, 140511, 140518, 140905, 141011, 141013, 141022, 160102, 160201, 160205, 160207, 160522, 160536, 160538, 160555, 160571, 160601, 160615, 160623, 160625, 160633, 161225, 161303, 161540, 180136, 180503, 180705, 180733, 190126, 190132, 190135, 190140, 190203, 190216, 190412, 190418, 210124, 240366, 240828, 242315, 242805, 242818, 242906, 243118, 243907, 246104 |



**Table 14.3.1 / 10: Number of subjects with adverse events including subject identifier and year by treatment (FAS)**

TREATMENT: LCS12

Primary system organ class

Preferred term

MedDRA version 14.0

Vaginitis bacterial

YEAR OF

ONSET

N (%)

subject identifier

1st year 52/1432 ( 3.6%)

2nd year 36/1166 ( 3.1%)

3rd year 30/ 963 ( 3.1%)

Overall 105/1432 ( 7.3%)

140210, 140802, 141101, 141201, 150104, 150149, 160431, 160515, 160726, 160754, 161436, 180644, 190203, 200908, 210109, 210514, 231016, 231112, 240116, 240304, 240312, 240327, 240357, 240622, 240720, 240801, 240827, 241521, 241547, 241605, 242506, 243030, 243314, 243510, 243712, 243903, 244003, 244316, 244402, 244441, 244447, 244508, 244909, 244917, 244919, 245004, 245423, 245516, 246106, 246121, 246122, 246138, 120323, 140113, 140802, 140807, 141034, 141426, 160402, 160525, 160609, 160913, 160982, 161001, 190619, 210124, 230818, 230908, 231103, 241129, 241405, 241704, 241902, 242218, 242506, 242805, 242807, 243010, 243709, 243978, 244402, 244515, 244617, 244931, 245004, 245519, 246122, 246212, 120323, 160425, 160520, 160746, 160914, 160949, 190605, 190618, 230406, 240622, 241015, 241227, 241421, 242506, 243117, 243709, 243807, 243914, 243978, 244105, 244425, 244509, 244809, 244914, 244931, 245432, 245518, 245807, 246106, 246122, 120323, 140113, 140210, 140802, 140807, 141034, 141101, 141201, 141426, 150104, 150149, 160402, 160425, 160431, 160515, 160520, 160525, 160609, 160726, 160746, 160754, 160913, 160914, 160949, 160982, 161001, 161436, 180644, 190203, 190605, 190618, 190619, 200908, 210109, 210124, 210514, 230406, 230818, 230908, 231016, 231103, 231112, 240116, 240304, 240312, 240327, 240357, 240622, 240720, 240801, 240827, 241015, 241129, 241227, 241405, 241421, 241521, 241547, 241605, 241704, 241902, 242218, 242506, 242805, 242807, 243010, 243030, 243117, 243314, 243510, 243709, 243712, 243807, 243903, 243914,

**Table 14.3.1 / 10: Number of subjects with adverse events including subject identifier and year by treatment (FAS)**

TREATMENT: LCS12

Primary system organ class

| Preferred term<br>MedDRA version 14.0   | YEAR OF<br>ONSET | N (%)           | subject identifier                                                                                                                                                                                                                                            |
|-----------------------------------------|------------------|-----------------|---------------------------------------------------------------------------------------------------------------------------------------------------------------------------------------------------------------------------------------------------------------|
|                                         |                  |                 | 243978, 244003, 244105, 244316, 244402, 244425,<br>244441, 244447, 244508, 244509, 244515, 244617,<br>244809, 244909, 244914, 244917, 244919, 244931,<br>245004, 245423, 245432, 245516, 245518, 245519,<br>245807,<br>246106, 246121, 246122, 246138, 246212 |
| Vaginitis chlamydial                    | 1st year         | 1/1432 ( <0.1%) | 243720                                                                                                                                                                                                                                                        |
|                                         | 2nd year         | 1/1166 ( <0.1%) | 241129                                                                                                                                                                                                                                                        |
|                                         | Overall          | 2/1432 ( 0.1%)  | 241129, 243720                                                                                                                                                                                                                                                |
| Vestibular neuritis                     | 1st year         | 2/1432 ( 0.1%)  | 160725, 230408                                                                                                                                                                                                                                                |
|                                         | Overall          | 2/1432 ( 0.1%)  | 160725, 230408                                                                                                                                                                                                                                                |
| Viral infection                         | 2nd year         | 2/1166 ( 0.2%)  | 140802, 241302                                                                                                                                                                                                                                                |
|                                         | 3rd year         | 1/ 963 ( 0.1%)  | 242712                                                                                                                                                                                                                                                        |
|                                         | Overall          | 3/1432 ( 0.2%)  | 140802, 241302, 242712                                                                                                                                                                                                                                        |
| Viral pharyngitis                       | 2nd year         | 1/1166 ( <0.1%) | 243320                                                                                                                                                                                                                                                        |
|                                         | Overall          | 1/1432 ( <0.1%) | 243320                                                                                                                                                                                                                                                        |
| Viral rhinitis                          | 2nd year         | 1/1166 ( <0.1%) | 243311                                                                                                                                                                                                                                                        |
|                                         | Overall          | 1/1432 ( <0.1%) | 243311                                                                                                                                                                                                                                                        |
| Viral upper respiratory tract infection | 1st year         | 7/1432 ( 0.5%)  | 161403, 161407, 161408, 161426, 161435, 161436,<br>161437                                                                                                                                                                                                     |
|                                         | 2nd year         | 9/1166 ( 0.8%)  | 161403, 161406, 161410, 161414, 161424, 161426,<br>161431, 161440, 243323                                                                                                                                                                                     |
|                                         | 3rd year         | 1/ 963 ( 0.1%)  | 242315                                                                                                                                                                                                                                                        |
|                                         | Overall          | 15/1432 ( 1.0%) | 161403, 161406, 161407, 161408, 161410, 161414,<br>161424, 161426, 161431, 161435, 161436, 161437,<br>161440, 242315, 243323                                                                                                                                  |
| Vulvitis                                | 1st year         | 5/1432 ( 0.3%)  | 120411, 140529, 150166, 160619, 190401                                                                                                                                                                                                                        |
|                                         | 2nd year         | 3/1166 ( 0.3%)  | 150138, 231103, 243302                                                                                                                                                                                                                                        |
|                                         | Overall          | 8/1432 ( 0.6%)  | 120411, 140529, 150138, 150166, 160619, 190401,<br>231103, 243302                                                                                                                                                                                             |

**Table 14.3.1 / 10: Number of subjects with adverse events including subject identifier and year by treatment (FAS)**

TREATMENT: LCS12

Primary system organ class

Preferred term

MedDRA version 14.0

Vulvovaginal candidiasis

YEAR OF

ONSET

N (%)

subject identifier

1st year 40/1432 ( 2.8%)

2nd year 25/1166 ( 2.1%)

3rd year 16/ 963 ( 1.7%)

Overall 72/1432 ( 5.0%)

 140206, 140911, 160220, 160402, 160404, 160515,  
 160555, 160928, 160935, 160954, 160981, 161102,  
 161106, 161117, 161124, 161218, 161408, 161424,  
 161426, 161431, 200104, 200703, 200916, 230408,  
 230517,  
 230816, 230817, 230904, 231012, 231016, 231017,  
 240357, 240516, 240520, 241204, 242818, 244518,  
 244917, 245003, 245019  
 140210, 140511, 160102, 160402, 160551, 160569,  
 160615, 160928, 160960, 161112, 161114, 161117,  
 161122, 161224, 161408, 161511, 190629, 200703,  
 230401, 231009, 231012, 231018, 231112, 242805,  
 246122  
 140518, 160576, 160623, 160624, 160746, 160911,  
 161109, 161122, 161127, 161203, 161303, 200121,  
 200703, 230604, 242818, 244931  
 140206, 140210, 140511, 140518, 140911, 160102,  
 160220, 160402, 160404, 160515, 160551, 160555,  
 160569, 160576, 160615, 160623, 160624, 160746,  
 160911, 160928, 160935, 160954, 160960, 160981,  
 161102,  
 161106, 161109, 161112, 161114, 161117, 161122,  
 161124, 161127, 161203, 161218, 161224, 161303,  
 161408, 161424, 161426, 161431, 161511, 190629,  
 200104, 200121, 200703, 200916, 230401, 230408,  
 230517,  
 230604, 230816, 230817, 230904, 231009, 231012,  
 231016, 231017, 231018, 231112, 240357, 240516,  
 240520, 241204, 242805, 242818, 244518, 244917,  
 244931, 245003, 245019, 246122

**Table 14.3.1 / 10: Number of subjects with adverse events including subject identifier and year by treatment (FAS)**

TREATMENT: LCS12

Primary system organ class

Preferred term

MedDRA version 14.0

|                                | YEAR OF ONSET | N (%)           | subject identifier                                                                                                                                                                                                                                                                                                                                                                                                                                                                                                                                                                                                                                                                                                                                                                                                     |
|--------------------------------|---------------|-----------------|------------------------------------------------------------------------------------------------------------------------------------------------------------------------------------------------------------------------------------------------------------------------------------------------------------------------------------------------------------------------------------------------------------------------------------------------------------------------------------------------------------------------------------------------------------------------------------------------------------------------------------------------------------------------------------------------------------------------------------------------------------------------------------------------------------------------|
| Vulvovaginal mycotic infection | 1st year      | 61/1432 ( 4.3%) | 141004, 141201, 150101, 150123, 150124, 150125, 150128, 150138, 150151, 150153, 150156, 150163, 160564, 160566, 160571, 160701, 160710, 160721, 160732, 160741, 160756, 161003, 170603, 180618, 180624, 230310, 240110, 240242, 240312, 240326, 240327, 240335, 240357, 240366, 240644, 240701, 241133, 241424, 241513, 241545, 241547, 242307, 242315, 242320, 243003, 243009, 243012, 243030, 243222, 243309, 243314, 243323, 243907, 244108, 244117, 244203, 244447, 244509, 244701, 245027, 245710                                                                                                                                                                                                                                                                                                                 |
|                                | 2nd year      | 35/1166 ( 3.0%) | 120323, 120626, 141426, 150109, 150112, 150123, 150138, 160418, 160566, 160705, 170101, 180621, 180662, 240357, 241414, 241525, 241541, 241725, 241902, 242302, 243117, 243220, 243307, 243309, 243314, 243502, 243829, 244203, 244408, 244430, 244602, 245514, 245519, 245808, 246122                                                                                                                                                                                                                                                                                                                                                                                                                                                                                                                                 |
|                                | 3rd year      | 20/ 963 ( 2.1%) | 120611, 140116, 150104, 150112, 150123, 150151, 150166, 160548, 160559, 160571, 160701, 160741, 170702, 242302, 243511, 243914, 244408, 244509, 245519, 245803                                                                                                                                                                                                                                                                                                                                                                                                                                                                                                                                                                                                                                                         |
|                                | Overall       | 99/1432 ( 6.9%) | 120323, 120611, 120626, 140116, 141004, 141201, 141426, 150101, 150104, 150109, 150112, 150123, 150124, 150125, 150128, 150138, 150151, 150153, 150156, 150163, 150166, 160418, 160548, 160559, 160564, 160566, 160571, 160701, 160705, 160710, 160721, 160732, 160741, 160756, 161003, 170101, 170603, 170702, 180618, 180621, 180624, 180662, 230310, 240110, 240242, 240312, 240326, 240327, 240335, 240357, 240366, 240644, 240701, 241133, 241414, 241424, 241513, 241525, 241541, 241545, 241547, 241725, 241902, 242302, 242307, 242315, 242320, 243003, 243009, 243012, 243030, 243117, 243220, 243222, 243307, 243309, 243314, 243323, 243502, 243511, 243829, 243907, 243914, 244108, 244117, 244203, 244408, 244430, 244447, 244509, 244602, 244701, 245027, 245514, 245519, 245710, 245803, 245808, 246122 |

**Table 14.3.1 / 10: Number of subjects with adverse events including subject identifier and year by treatment (FAS)**

TREATMENT: LCS12

Primary system organ class

| Preferred term<br>MedDRA version 14.0          | YEAR OF<br>ONSET | N (%)             | subject identifier                             |
|------------------------------------------------|------------------|-------------------|------------------------------------------------|
| Vulvovaginitis                                 | 1st year         | 6/1432 ( 0.4%)    | 120414, 120626, 120630, 150123, 180346, 190402 |
|                                                | 3rd year         | 1/ 963 ( 0.1%)    | 180346                                         |
|                                                | Overall          | 6/1432 ( 0.4%)    | 120414, 120626, 120630, 150123, 180346, 190402 |
| Vulvovaginitis streptococcal                   | 1st year         | 1/1432 ( <0.1%)   | 245025                                         |
|                                                | Overall          | 1/1432 ( <0.1%)   | 245025                                         |
| Vulvovaginitis trichomonal                     | 1st year         | 1/1432 ( <0.1%)   | 140608                                         |
|                                                | 2nd year         | 1/1166 ( <0.1%)   | 245808                                         |
|                                                | 3rd year         | 2/ 963 ( 0.2%)    | 120214, 240623                                 |
|                                                | Overall          | 4/1432 ( 0.3%)    | 120214, 140608, 240623, 245808                 |
| Wound infection                                | 1st year         | 1/1432 ( <0.1%)   | 140802                                         |
|                                                | 2nd year         | 1/1166 ( <0.1%)   | 161301                                         |
|                                                | 3rd year         | 1/ 963 ( 0.1%)    | 160520                                         |
|                                                | Overall          | 3/1432 ( 0.2%)    | 140802, 160520, 161301                         |
| Injury, poisoning and procedural complications | 1st year         | 98/1432 ( 6.8%)   |                                                |
|                                                | 2nd year         | 31/1166 ( 2.7%)   |                                                |
|                                                | 3rd year         | 30/ 963 ( 3.1%)   |                                                |
|                                                | Overall          | 149/1432 ( 10.4%) |                                                |
| Animal bite                                    | 1st year         | 2/1432 ( 0.1%)    | 160572, 160928                                 |
|                                                | 2nd year         | 1/1166 ( <0.1%)   | 120312                                         |
|                                                | Overall          | 3/1432 ( 0.2%)    | 120312, 160572, 160928                         |
| Ankle fracture                                 | 2nd year         | 1/1166 ( <0.1%)   | 120411                                         |
|                                                | Overall          | 1/1432 ( <0.1%)   | 120411                                         |
| Arthropod bite                                 | 1st year         | 3/1432 ( 0.2%)    | 150163, 180728, 244518                         |
|                                                | 2nd year         | 1/1166 ( <0.1%)   | 243611                                         |
|                                                | 3rd year         | 1/ 963 ( 0.1%)    | 161001                                         |
|                                                | Overall          | 5/1432 ( 0.3%)    | 150163, 161001, 180728, 243611, 244518         |
| Burns third degree                             | 1st year         | 1/1432 ( <0.1%)   | 241190                                         |
|                                                | Overall          | 1/1432 ( <0.1%)   | 241190                                         |
| Clavicle fracture                              | 3rd year         | 1/ 963 ( 0.1%)    | 161408                                         |
|                                                | Overall          | 1/1432 ( <0.1%)   | 161408                                         |

**Table 14.3.1 / 10: Number of subjects with adverse events including subject identifier and year by treatment (FAS)**

TREATMENT: LCS12

Primary system organ class

| Preferred term<br>MedDRA version 14.0 | YEAR OF<br>ONSET | N (%)           | subject identifier                                                     |
|---------------------------------------|------------------|-----------------|------------------------------------------------------------------------|
| Concussion                            | 1st year         | 1/1432 ( <0.1%) | 230219                                                                 |
|                                       | 2nd year         | 2/1166 ( 0.2%)  | 160633, 200505                                                         |
|                                       | Overall          | 3/1432 ( 0.2%)  | 160633, 200505, 230219                                                 |
| Contusion                             | 1st year         | 5/1432 ( 0.3%)  | 150124, 161406, 200631, 243327, 243711                                 |
|                                       | 3rd year         | 2/ 963 ( 0.2%)  | 160605, 244515                                                         |
|                                       | Overall          | 7/1432 ( 0.5%)  | 150124, 160605, 161406, 200631, 243327, 243711, 244515                 |
| Epicondylitis                         | 1st year         | 2/1432 ( 0.1%)  | 160558, 160619                                                         |
|                                       | Overall          | 2/1432 ( 0.1%)  | 160558, 160619                                                         |
| Eye injury                            | 3rd year         | 1/ 963 ( 0.1%)  | 160506                                                                 |
|                                       | Overall          | 1/1432 ( <0.1%) | 160506                                                                 |
| Facial bones fracture                 | 2nd year         | 2/1166 ( 0.2%)  | 200901, 244412                                                         |
|                                       | Overall          | 2/1432 ( 0.1%)  | 200901, 244412                                                         |
| Foot fracture                         | 1st year         | 3/1432 ( 0.2%)  | 241805, 245911, 245932                                                 |
|                                       | 2nd year         | 3/1166 ( 0.3%)  | 241406, 242902, 245808                                                 |
|                                       | 3rd year         | 4/ 963 ( 0.4%)  | 180511, 240508, 242902, 245933                                         |
|                                       | Overall          | 9/1432 ( 0.6%)  | 180511, 240508, 241406, 241805, 242902, 245808, 245911, 245932, 245933 |
| Forearm fracture                      | 1st year         | 1/1432 ( <0.1%) | 140520                                                                 |
|                                       | Overall          | 1/1432 ( <0.1%) | 140520                                                                 |
| Frostbite                             | 1st year         | 1/1432 ( <0.1%) | 141426                                                                 |
|                                       | Overall          | 1/1432 ( <0.1%) | 141426                                                                 |
| Hand fracture                         | 3rd year         | 1/ 963 ( 0.1%)  | 160623                                                                 |
|                                       | Overall          | 1/1432 ( <0.1%) | 160623                                                                 |
| Head injury                           | 1st year         | 1/1432 ( <0.1%) | 243117                                                                 |
|                                       | Overall          | 1/1432 ( <0.1%) | 243117                                                                 |

**Table 14.3.1 / 10: Number of subjects with adverse events including subject identifier and year by treatment (FAS)**

TREATMENT: LCS12

Primary system organ class

| Preferred term<br>MedDRA version 14.0 | YEAR OF<br>ONSET | N (%)           | subject identifier                                                                                     |
|---------------------------------------|------------------|-----------------|--------------------------------------------------------------------------------------------------------|
| Joint dislocation                     | 1st year         | 3/1432 ( 0.2%)  | 160506, 180707, 200119                                                                                 |
|                                       | 2nd year         | 1/1166 ( <0.1%) | 160405                                                                                                 |
|                                       | 3rd year         | 1/ 963 ( 0.1%)  | 160984                                                                                                 |
|                                       | Overall          | 5/1432 ( 0.3%)  | 160405, 160506, 160984, 180707, 200119                                                                 |
| Joint injury                          | 1st year         | 5/1432 ( 0.3%)  | 120326, 120621, 160615, 180642, 244523                                                                 |
|                                       | 2nd year         | 1/1166 ( <0.1%) | 160121                                                                                                 |
|                                       | 3rd year         | 1/ 963 ( 0.1%)  | 244504                                                                                                 |
|                                       | Overall          | 7/1432 ( 0.5%)  | 120326, 120621, 160121, 160615, 180642, 244504, 244523                                                 |
| Joint sprain                          | 1st year         | 7/1432 ( 0.5%)  | 140301, 160108, 160130, 160605, 200911, 210409, 243711                                                 |
|                                       | 2nd year         | 3/1166 ( 0.3%)  | 160803, 160806, 170413                                                                                 |
|                                       | 3rd year         | 3/ 963 ( 0.3%)  | 120307, 120315, 242906                                                                                 |
|                                       | Overall          | 13/1432 ( 0.9%) | 120307, 120315, 140301, 160108, 160130, 160605, 160803, 160806, 170413, 200911, 210409, 242906, 243711 |
| Laceration                            | 1st year         | 1/1432 ( <0.1%) | 140802                                                                                                 |
|                                       | 2nd year         | 1/1166 ( <0.1%) | 244422                                                                                                 |
|                                       | 3rd year         | 1/ 963 ( 0.1%)  | 243916                                                                                                 |
|                                       | Overall          | 3/1432 ( 0.2%)  | 140802, 243916, 244422                                                                                 |
| Laryngeal injury                      | 1st year         | 1/1432 ( <0.1%) | 230613                                                                                                 |
|                                       | Overall          | 1/1432 ( <0.1%) | 230613                                                                                                 |
| Ligament rupture                      | 1st year         | 2/1432 ( 0.1%)  | 230104, 240716                                                                                         |
|                                       | 3rd year         | 1/ 963 ( 0.1%)  | 241717                                                                                                 |
|                                       | Overall          | 3/1432 ( 0.2%)  | 230104, 240716, 241717                                                                                 |
| Limb crushing injury                  | 3rd year         | 1/ 963 ( 0.1%)  | 160108                                                                                                 |
|                                       | Overall          | 1/1432 ( <0.1%) | 160108                                                                                                 |
| Limb injury                           | 3rd year         | 1/ 963 ( 0.1%)  | 160127                                                                                                 |
|                                       | Overall          | 1/1432 ( <0.1%) | 160127                                                                                                 |
| Lower limb fracture                   | 3rd year         | 1/ 963 ( 0.1%)  | 161523                                                                                                 |
|                                       | Overall          | 1/1432 ( <0.1%) | 161523                                                                                                 |

**Table 14.3.1 / 10: Number of subjects with adverse events including subject identifier and year by treatment (FAS)**

TREATMENT: LCS12

Primary system organ class

| Preferred term<br>MedDRA version 14.0 | YEAR OF<br>ONSET | N (%)           | subject identifier                                     |
|---------------------------------------|------------------|-----------------|--------------------------------------------------------|
| Meniscus lesion                       | 1st year         | 1/1432 ( <0.1%) | 180642                                                 |
|                                       | 2nd year         | 1/1166 ( <0.1%) | 242807                                                 |
|                                       | 3rd year         | 1/ 963 ( 0.1%)  | 240701                                                 |
|                                       | Overall          | 3/1432 ( 0.2%)  | 180642, 240701, 242807                                 |
| Muscle injury                         | 1st year         | 3/1432 ( 0.2%)  | 140118, 140605, 243327                                 |
|                                       | 2nd year         | 1/1166 ( <0.1%) | 140202                                                 |
|                                       | 3rd year         | 1/ 963 ( 0.1%)  | 140511                                                 |
|                                       | Overall          | 5/1432 ( 0.3%)  | 140118, 140202, 140511, 140605, 243327                 |
| Muscle strain                         | 1st year         | 4/1432 ( 0.3%)  | 140118, 140605, 244407, 244701                         |
|                                       | 3rd year         | 3/ 963 ( 0.3%)  | 140511, 160427, 243617                                 |
|                                       | Overall          | 7/1432 ( 0.5%)  | 140118, 140511, 140605, 160427, 243617, 244407, 244701 |
| Nail avulsion                         | 3rd year         | 1/ 963 ( 0.1%)  | 245933                                                 |
|                                       | Overall          | 1/1432 ( <0.1%) | 245933                                                 |
| Overdose                              | 3rd year         | 1/ 963 ( 0.1%)  | 230720                                                 |
|                                       | Overall          | 1/1432 ( <0.1%) | 230720                                                 |
| Post procedural haemorrhage           | 1st year         | 1/1432 ( <0.1%) | 150136                                                 |
|                                       | 2nd year         | 1/1166 ( <0.1%) | 241113                                                 |
|                                       | Overall          | 2/1432 ( 0.1%)  | 150136, 241113                                         |
| Post-traumatic pain                   | 1st year         | 2/1432 ( 0.1%)  | 120326, 160803                                         |
|                                       | 2nd year         | 1/1166 ( <0.1%) | 241421                                                 |
|                                       | Overall          | 3/1432 ( 0.2%)  | 120326, 160803, 241421                                 |



**Table 14.3.1 / 10: Number of subjects with adverse events including subject identifier and year by treatment (FAS)**

TREATMENT: LCS12

Primary system organ class

| Preferred term<br>MedDRA version 14.0 | YEAR OF<br>ONSET | N (%)           | subject identifier                                                                                                                                                                                                                                                                                                                                                                                                                                                             |
|---------------------------------------|------------------|-----------------|--------------------------------------------------------------------------------------------------------------------------------------------------------------------------------------------------------------------------------------------------------------------------------------------------------------------------------------------------------------------------------------------------------------------------------------------------------------------------------|
| Procedural pain                       | 1st year         | 48/1432 ( 3.4%) | 120418, 140808, 150503, 160201, 160329, 160520, 160525, 160538, 160615, 160626, 160704, 160705, 160710, 160713, 160738, 160739, 160743, 161002, 161017, 161018, 161102, 161104, 161110, 161112, 161114, 161117, 161121, 161122, 161127, 161531, 170704, 180621, 200112, 200501, 200503, 200708, 210205, 230607, 231009, 240215, 241405, 241536, 242906, 242909, 243314, 243916, 244302, 244807                                                                                 |
|                                       | 2nd year         | 8/1166 ( 0.7%)  | 160506, 160746, 210127, 240510, 242307, 242315, 243121, 244509                                                                                                                                                                                                                                                                                                                                                                                                                 |
|                                       | 3rd year         | 4/ 963 ( 0.4%)  | 160506, 242308, 242315, 244408                                                                                                                                                                                                                                                                                                                                                                                                                                                 |
|                                       | Overall          | 58/1432 ( 4.1%) | 120418, 140808, 150503, 160201, 160329, 160506, 160520, 160525, 160538, 160615, 160626, 160704, 160705, 160710, 160713, 160738, 160739, 160743, 160746, 161002, 161017, 161018, 161102, 161104, 161110, 161112, 161114, 161117, 161121, 161122, 161127, 161531, 170704, 180621, 200112, 200501, 200503, 200708, 210127, 210205, 230607, 231009, 240215, 240510, 241405, 241536, 242307, 242308, 242315, 242906, 242909, 243121, 243314, 243916, 244302, 244408, 244509, 244807 |
|                                       |                  |                 |                                                                                                                                                                                                                                                                                                                                                                                                                                                                                |
| Procedural vomiting                   | 1st year         | 1/1432 ( <0.1%) | 160712                                                                                                                                                                                                                                                                                                                                                                                                                                                                         |
|                                       | Overall          | 1/1432 ( <0.1%) | 160712                                                                                                                                                                                                                                                                                                                                                                                                                                                                         |
| Radius fracture                       | 2nd year         | 1/1166 ( <0.1%) | 240904                                                                                                                                                                                                                                                                                                                                                                                                                                                                         |
|                                       | Overall          | 1/1432 ( <0.1%) | 240904                                                                                                                                                                                                                                                                                                                                                                                                                                                                         |
| Rib fracture                          | 1st year         | 1/1432 ( <0.1%) | 210107                                                                                                                                                                                                                                                                                                                                                                                                                                                                         |
|                                       | Overall          | 1/1432 ( <0.1%) | 210107                                                                                                                                                                                                                                                                                                                                                                                                                                                                         |
| Road traffic accident                 | 1st year         | 3/1432 ( 0.2%)  | 190610, 243327, 245702                                                                                                                                                                                                                                                                                                                                                                                                                                                         |
|                                       | Overall          | 3/1432 ( 0.2%)  | 190610, 243327, 245702                                                                                                                                                                                                                                                                                                                                                                                                                                                         |
| Seroma                                | 3rd year         | 1/ 963 ( 0.1%)  | 242906                                                                                                                                                                                                                                                                                                                                                                                                                                                                         |
|                                       | Overall          | 1/1432 ( <0.1%) | 242906                                                                                                                                                                                                                                                                                                                                                                                                                                                                         |

**Table 14.3.1 / 10: Number of subjects with adverse events including subject identifier and year by treatment (FAS)**

TREATMENT: LCS12

Primary system organ class

| Preferred term<br>MedDRA version 14.0             | YEAR OF<br>ONSET | N (%)             | subject identifier                                                     |
|---------------------------------------------------|------------------|-------------------|------------------------------------------------------------------------|
| Shunt occlusion                                   | 1st year         | 1/1432 ( <0.1%)   | 160329                                                                 |
|                                                   | Overall          | 1/1432 ( <0.1%)   | 160329                                                                 |
| Subdural haematoma                                | 1st year         | 1/1432 ( <0.1%)   | 160329                                                                 |
|                                                   | Overall          | 1/1432 ( <0.1%)   | 160329                                                                 |
| Tendon rupture                                    | 1st year         | 1/1432 ( <0.1%)   | 160108                                                                 |
|                                                   | 3rd year         | 2/ 963 ( 0.2%)    | 160105, 160130                                                         |
|                                                   | Overall          | 3/1432 ( 0.2%)    | 160105, 160108, 160130                                                 |
| Tibia fracture                                    | 2nd year         | 1/1166 ( <0.1%)   | 241545                                                                 |
|                                                   | Overall          | 1/1432 ( <0.1%)   | 241545                                                                 |
| Traumatic fracture                                | 1st year         | 1/1432 ( <0.1%)   | 160528                                                                 |
|                                                   | Overall          | 1/1432 ( <0.1%)   | 160528                                                                 |
| Upper limb fracture                               | 2nd year         | 1/1166 ( <0.1%)   | 150143                                                                 |
|                                                   | Overall          | 1/1432 ( <0.1%)   | 150143                                                                 |
| Whiplash injury                                   | 1st year         | 1/1432 ( <0.1%)   | 243220                                                                 |
|                                                   | Overall          | 1/1432 ( <0.1%)   | 243220                                                                 |
| Wound                                             | 1st year         | 1/1432 ( <0.1%)   | 150149                                                                 |
|                                                   | Overall          | 1/1432 ( <0.1%)   | 150149                                                                 |
| Investigations                                    | 1st year         | 57/1432 ( 4.0%)   |                                                                        |
|                                                   | 2nd year         | 37/1166 ( 3.2%)   |                                                                        |
|                                                   | 3rd year         | 61/ 963 ( 6.3%)   |                                                                        |
|                                                   | Overall          | 150/1432 ( 10.5%) |                                                                        |
| Alanine aminotransferase increased                | 1st year         | 1/1432 ( <0.1%)   | 160213                                                                 |
|                                                   | 2nd year         | 1/1166 ( <0.1%)   | 241605                                                                 |
|                                                   | 3rd year         | 6/ 963 ( 0.6%)    | 150112, 160519, 170608, 243806, 244508, 245710                         |
|                                                   | Overall          | 9/1432 ( 0.6%)    | 150112, 160213, 160519, 170608, 241605, 242313, 243806, 244508, 245710 |
| Antibiotic resistant Staphylococcus test positive | 1st year         | 1/1432 ( <0.1%)   | 243948                                                                 |
|                                                   | 3rd year         | 1/ 963 ( 0.1%)    | 243323                                                                 |
|                                                   | Overall          | 2/1432 ( 0.1%)    | 243323, 243948                                                         |

**Table 14.3.1 / 10: Number of subjects with adverse events including subject identifier and year by treatment (FAS)**

TREATMENT: LCS12

Primary system organ class

| Preferred term<br>MedDRA version 14.0 | YEAR OF<br>ONSET | N (%)           | subject identifier                             |
|---------------------------------------|------------------|-----------------|------------------------------------------------|
| Aspartate aminotransferase increased  | 1st year         | 1/1432 ( <0.1%) | 160213                                         |
|                                       | 3rd year         | 4/ 963 ( 0.4%)  | 150112, 160519, 244508, 245710                 |
|                                       | Overall          | 6/1432 ( 0.4%)  | 150112, 160213, 160519, 242313, 244508, 245710 |
| Biopsy muscle                         | 1st year         | 1/1432 ( <0.1%) | 230613                                         |
|                                       | Overall          | 1/1432 ( <0.1%) | 230613                                         |
| Blood alkaline phosphatase decreased  | 3rd year         | 1/ 963 ( 0.1%)  | 150123                                         |
|                                       | Overall          | 1/1432 ( <0.1%) | 150123                                         |
| Blood cholesterol increased           | 1st year         | 3/1432 ( 0.2%)  | 160758, 200908, 240112                         |
|                                       | Overall          | 3/1432 ( 0.2%)  | 160758, 200908, 240112                         |
| Blood potassium abnormal              | 3rd year         | 1/ 963 ( 0.1%)  | 200205                                         |
|                                       | Overall          | 1/1432 ( <0.1%) | 200205                                         |
| Blood pressure increased              | 2nd year         | 2/1166 ( 0.2%)  | 160637, 230720                                 |
|                                       | 3rd year         | 1/ 963 ( 0.1%)  | 245528                                         |
|                                       | Overall          | 3/1432 ( 0.2%)  | 160637, 230720, 245528                         |
| Blood sodium decreased                | 3rd year         | 1/ 963 ( 0.1%)  | 150142                                         |
|                                       | Overall          | 1/1432 ( <0.1%) | 150142                                         |
| Blood triglycerides increased         | 1st year         | 1/1432 ( <0.1%) | 200908                                         |
|                                       | Overall          | 1/1432 ( <0.1%) | 200908                                         |
| Blood urine present                   | 3rd year         | 3/ 963 ( 0.3%)  | 244417, 244425, 246220                         |
|                                       | Overall          | 3/1432 ( 0.2%)  | 244417, 244425, 246220                         |
| Carbohydrate antigen 125 increased    | 3rd year         | 1/ 963 ( 0.1%)  | 241305                                         |
|                                       | Overall          | 1/1432 ( <0.1%) | 241305                                         |
| Cardiac murmur                        | 2nd year         | 1/1166 ( <0.1%) | 241416                                         |
|                                       | Overall          | 1/1432 ( <0.1%) | 241416                                         |

**Table 14.3.1 / 10: Number of subjects with adverse events including subject identifier and year by treatment (FAS)**

TREATMENT: LCS12

Primary system organ class

| Preferred term<br>MedDRA version 14.0 | YEAR OF<br>ONSET | N (%)           | subject identifier                                     |
|---------------------------------------|------------------|-----------------|--------------------------------------------------------|
| Chlamydia test positive               | 1st year         | 2/1432 ( 0.1%)  | 160575, 245004                                         |
|                                       | 2nd year         | 2/1166 ( 0.2%)  | 240622, 241547                                         |
|                                       | 3rd year         | 3/ 963 ( 0.3%)  | 200611, 200923, 242818                                 |
|                                       | Overall          | 7/1432 ( 0.5%)  | 160575, 200611, 200923, 240622, 241547, 242818, 245004 |
| Escherichia test positive             | 3rd year         | 1/ 963 ( 0.1%)  | 150506                                                 |
|                                       | Overall          | 1/1432 ( <0.1%) | 150506                                                 |
| Gamma-glutamyltransferase increased   | 3rd year         | 4/ 963 ( 0.4%)  | 150168, 160437, 160619, 180416                         |
|                                       | Overall          | 4/1432 ( 0.3%)  | 150168, 160437, 160619, 180416                         |
| Glycosylated haemoglobin increased    | 2nd year         | 1/1166 ( <0.1%) | 243302                                                 |
|                                       | 3rd year         | 4/ 963 ( 0.4%)  | 240234, 244427, 245525, 246119                         |
|                                       | Overall          | 5/1432 ( 0.3%)  | 240234, 243302, 244427, 245525, 246119                 |
| Haematocrit decreased                 | 1st year         | 1/1432 ( <0.1%) | 244125                                                 |
|                                       | Overall          | 1/1432 ( <0.1%) | 244125                                                 |
| Haematocrit increased                 | 2nd year         | 1/1166 ( <0.1%) | 150110                                                 |
|                                       | 3rd year         | 1/ 963 ( 0.1%)  | 150123                                                 |
|                                       | Overall          | 2/1432 ( 0.1%)  | 150110, 150123                                         |
| Haemoglobin decreased                 | 1st year         | 2/1432 ( 0.1%)  | 140116, 244125                                         |
|                                       | 2nd year         | 1/1166 ( <0.1%) | 160201                                                 |
|                                       | 3rd year         | 2/ 963 ( 0.2%)  | 241414, 245525                                         |
|                                       | Overall          | 5/1432 ( 0.3%)  | 140116, 160201, 241414, 244125, 245525                 |
| Hepatic enzyme increased              | 1st year         | 1/1432 ( <0.1%) | 190418                                                 |
|                                       | Overall          | 1/1432 ( <0.1%) | 190418                                                 |
| High density lipoprotein decreased    | 3rd year         | 3/ 963 ( 0.3%)  | 150123, 150138, 150151                                 |
|                                       | Overall          | 3/1432 ( 0.2%)  | 150123, 150138, 150151                                 |
| Human papilloma virus test positive   | 1st year         | 1/1432 ( <0.1%) | 160976                                                 |
|                                       | 2nd year         | 3/1166 ( 0.3%)  | 241005, 241028, 245603                                 |
|                                       | 3rd year         | 1/ 963 ( 0.1%)  | 141029                                                 |
|                                       | Overall          | 5/1432 ( 0.3%)  | 141029, 160976, 241005, 241028, 245603                 |

**Table 14.3.1 / 10: Number of subjects with adverse events including subject identifier and year by treatment (FAS)**

TREATMENT: LCS12

Primary system organ class

| Preferred term<br>MedDRA version 14.0 | YEAR OF<br>ONSET | N (%)           | subject identifier                                                                                                                                   |
|---------------------------------------|------------------|-----------------|------------------------------------------------------------------------------------------------------------------------------------------------------|
| Low density lipoprotein increased     | 1st year         | 1/1432 ( <0.1%) | 243207                                                                                                                                               |
|                                       | Overall          | 1/1432 ( <0.1%) | 243207                                                                                                                                               |
| Neisseria test positive               | 1st year         | 1/1432 ( <0.1%) | 240623                                                                                                                                               |
|                                       | 2nd year         | 1/1166 ( <0.1%) | 240622                                                                                                                                               |
|                                       | Overall          | 2/1432 ( 0.1%)  | 240622, 240623                                                                                                                                       |
| Platelet count decreased              | 3rd year         | 2/ 963 ( 0.2%)  | 150145, 242902                                                                                                                                       |
|                                       | Overall          | 2/1432 ( 0.1%)  | 150145, 242902                                                                                                                                       |
| Protein urine present                 | 3rd year         | 1/ 963 ( 0.1%)  | 244809                                                                                                                                               |
|                                       | Overall          | 1/1432 ( <0.1%) | 244809                                                                                                                                               |
| Red blood cell count increased        | 2nd year         | 1/1166 ( <0.1%) | 150110                                                                                                                                               |
|                                       | Overall          | 1/1432 ( <0.1%) | 150110                                                                                                                                               |
| Simplex virus test positive           | 2nd year         | 1/1166 ( <0.1%) | 243933                                                                                                                                               |
|                                       | 3rd year         | 1/ 963 ( 0.1%)  | 241015                                                                                                                                               |
|                                       | Overall          | 2/1432 ( 0.1%)  | 241015, 243933                                                                                                                                       |
| Smear cervix abnormal                 | 1st year         | 2/1432 ( 0.1%)  | 200208, 245411                                                                                                                                       |
|                                       | 2nd year         | 9/1166 ( 0.8%)  | 160406, 160514, 180662, 200210, 200908, 240712,<br>241706, 243219, 245603                                                                            |
|                                       | 3rd year         | 7/ 963 ( 0.7%)  | 180225, 200304, 240514, 241172, 241717, 243611,<br>244523                                                                                            |
|                                       | Overall          | 18/1432 ( 1.3%) | 160406, 160514, 180225, 180662, 200208, 200210,<br>200304, 200908, 240514, 240712, 241172, 241706,<br>241717, 243219, 243611, 244523, 245411, 245603 |
| Streptococcus test positive           | 2nd year         | 1/1166 ( <0.1%) | 160129                                                                                                                                               |
|                                       | Overall          | 1/1432 ( <0.1%) | 160129                                                                                                                                               |
| Ultrasound ovary abnormal             | 2nd year         | 1/1166 ( <0.1%) | 140612                                                                                                                                               |
|                                       | Overall          | 1/1432 ( <0.1%) | 140612                                                                                                                                               |

**Table 14.3.1 / 10: Number of subjects with adverse events including subject identifier and year by treatment (FAS)**

TREATMENT: LCS12

Primary system organ class

| Preferred term<br>MedDRA version 14.0 | YEAR OF<br>ONSET | N (%)           | subject identifier                                                                                                                                                                                                                                                                                                                                                                                                                                             |
|---------------------------------------|------------------|-----------------|----------------------------------------------------------------------------------------------------------------------------------------------------------------------------------------------------------------------------------------------------------------------------------------------------------------------------------------------------------------------------------------------------------------------------------------------------------------|
| Weight decreased                      | 1st year         | 2/1432 ( 0.1%)  | 140105, 243004                                                                                                                                                                                                                                                                                                                                                                                                                                                 |
|                                       | 2nd year         | 3/1166 ( 0.3%)  | 140204, 241119, 243611                                                                                                                                                                                                                                                                                                                                                                                                                                         |
|                                       | 3rd year         | 4/ 963 ( 0.4%)  | 120315, 230501, 241102, 245431                                                                                                                                                                                                                                                                                                                                                                                                                                 |
|                                       | Overall          | 9/1432 ( 0.6%)  | 120315, 140105, 140204, 230501, 241102, 241119, 243004, 243611, 245431                                                                                                                                                                                                                                                                                                                                                                                         |
|                                       |                  |                 |                                                                                                                                                                                                                                                                                                                                                                                                                                                                |
| Weight increased                      | 1st year         | 39/1432 ( 2.7%) | 120201, 120401, 140210, 140302, 140520, 141412, 141426, 160550, 160576, 160615, 160619, 160746, 180110, 210124, 230214, 230501, 230517, 231112, 240123, 240826, 241123, 241133, 241162, 241187, 241406, 241531, 241545, 241553, 243022, 243030, 243952, 244122, 244314, 244414, 244441, 245414, 245418, 245928, 245932                                                                                                                                         |
|                                       | 2nd year         | 11/1166 ( 0.9%) | 160734, 230517, 230720, 240525, 241005, 241110, 242902, 242910, 243830, 244914, 246141                                                                                                                                                                                                                                                                                                                                                                         |
|                                       | 3rd year         | 7/ 963 ( 0.7%)  | 140718, 140817, 230501, 240321, 241149, 244430, 244909                                                                                                                                                                                                                                                                                                                                                                                                         |
|                                       | Overall          | 56/1432 ( 3.9%) | 120201, 120401, 140210, 140302, 140520, 140718, 140817, 141412, 141426, 160550, 160576, 160615, 160619, 160734, 160746, 161111, 180110, 210124, 230214, 230501, 230517, 230720, 231112, 240123, 240321, 240525, 240826, 241005, 241110, 241123, 241133, 241149, 241162, 241187, 241406, 241531, 241545, 241553, 242902, 242910, 243022, 243030, 243830, 243952, 244122, 244314, 244414, 244430, 244441, 244909, 244914, 245414, 245418, 245928, 245932, 246141 |
|                                       |                  |                 |                                                                                                                                                                                                                                                                                                                                                                                                                                                                |
| White blood cell count decreased      | 3rd year         | 4/ 963 ( 0.4%)  | 161221, 180418, 190203, 241130                                                                                                                                                                                                                                                                                                                                                                                                                                 |
|                                       | Overall          | 4/1432 ( 0.3%)  | 161221, 180418, 190203, 241130                                                                                                                                                                                                                                                                                                                                                                                                                                 |
| White blood cell count increased      | 2nd year         | 1/1166 ( <0.1%) | 140212                                                                                                                                                                                                                                                                                                                                                                                                                                                         |
|                                       | 3rd year         | 4/ 963 ( 0.4%)  | 160506, 180645, 190225, 244430                                                                                                                                                                                                                                                                                                                                                                                                                                 |
|                                       | Overall          | 5/1432 ( 0.3%)  | 140212, 160506, 180645, 190225, 244430                                                                                                                                                                                                                                                                                                                                                                                                                         |
| White blood cells urine positive      | 2nd year         | 1/1166 ( <0.1%) | 140302                                                                                                                                                                                                                                                                                                                                                                                                                                                         |
|                                       | 3rd year         | 2/ 963 ( 0.2%)  | 160741, 241159                                                                                                                                                                                                                                                                                                                                                                                                                                                 |
|                                       | Overall          | 3/1432 ( 0.2%)  | 140302, 160741, 241159                                                                                                                                                                                                                                                                                                                                                                                                                                         |

**Table 14.3.1 / 10: Number of subjects with adverse events including subject identifier and year by treatment (FAS)**

TREATMENT: LCS12

Primary system organ class

| Preferred term<br>MedDRA version 14.0 | YEAR OF<br>ONSET | N (%)           | subject identifier     |
|---------------------------------------|------------------|-----------------|------------------------|
| Metabolism and nutrition disorders    | 1st year         | 11/1432 ( 0.8%) |                        |
|                                       | 2nd year         | 2/1166 ( 0.2%)  |                        |
|                                       | 3rd year         | 5/ 963 ( 0.5%)  |                        |
|                                       | Overall          | 18/1432 ( 1.3%) |                        |
| Cell death                            | 2nd year         | 1/1166 ( <0.1%) | 242706                 |
|                                       | Overall          | 1/1432 ( <0.1%) | 242706                 |
| Cholesterosis                         | 1st year         | 1/1432 ( <0.1%) | 241536                 |
|                                       | Overall          | 1/1432 ( <0.1%) | 241536                 |
| Decreased appetite                    | 3rd year         | 2/ 963 ( 0.2%)  | 120315, 243323         |
|                                       | Overall          | 2/1432 ( 0.1%)  | 120315, 243323         |
| Fluid retention                       | 1st year         | 3/1432 ( 0.2%)  | 241406, 242307, 243403 |
|                                       | Overall          | 3/1432 ( 0.2%)  | 241406, 242307, 243403 |
| Glucose tolerance impaired            | 3rd year         | 1/ 963 ( 0.1%)  | 243514                 |
|                                       | Overall          | 1/1432 ( <0.1%) | 243514                 |
| Hypokalaemia                          | 1st year         | 1/1432 ( <0.1%) | 241410                 |
|                                       | 3rd year         | 1/ 963 ( 0.1%)  | 242320                 |
|                                       | Overall          | 2/1432 ( 0.1%)  | 241410, 242320         |
| Hyponatraemia                         | 1st year         | 1/1432 ( <0.1%) | 241410                 |
|                                       | Overall          | 1/1432 ( <0.1%) | 241410                 |
| Increased appetite                    | 1st year         | 1/1432 ( <0.1%) | 140802                 |
|                                       | Overall          | 1/1432 ( <0.1%) | 140802                 |
| Insulin resistance                    | 1st year         | 2/1432 ( 0.1%)  | 241108, 241123         |
|                                       | Overall          | 2/1432 ( 0.1%)  | 241108, 241123         |
| Lactose intolerance                   | 1st year         | 2/1432 ( 0.1%)  | 230804, 241807         |
|                                       | Overall          | 2/1432 ( 0.1%)  | 230804, 241807         |
| Type 2 diabetes mellitus              | 2nd year         | 1/1166 ( <0.1%) | 240135                 |
|                                       | Overall          | 1/1432 ( <0.1%) | 240135                 |

**Table 14.3.1 / 10: Number of subjects with adverse events including subject identifier and year by treatment (FAS)**

TREATMENT: LCS12

Primary system organ class

| Preferred term<br>MedDRA version 14.0           | YEAR OF<br>ONSET | N (%)             | subject identifier                                                                                                                                                              |
|-------------------------------------------------|------------------|-------------------|---------------------------------------------------------------------------------------------------------------------------------------------------------------------------------|
| Vitamin B12 deficiency                          | 1st year         | 1/1432 ( <0.1%)   | 230401                                                                                                                                                                          |
|                                                 | Overall          | 1/1432 ( <0.1%)   | 230401                                                                                                                                                                          |
| Vitamin D deficiency                            | 3rd year         | 1/ 963 ( 0.1%)    | 241302                                                                                                                                                                          |
|                                                 | Overall          | 1/1432 ( <0.1%)   | 241302                                                                                                                                                                          |
| Musculoskeletal and connective tissue disorders | 1st year         | 89/1432 ( 6.2%)   |                                                                                                                                                                                 |
|                                                 | 2nd year         | 37/1166 ( 3.2%)   |                                                                                                                                                                                 |
|                                                 | 3rd year         | 33/ 963 ( 3.4%)   |                                                                                                                                                                                 |
|                                                 | Overall          | 144/1432 ( 10.1%) |                                                                                                                                                                                 |
| Ankylosing spondylitis                          | 1st year         | 1/1432 ( <0.1%)   | 160935                                                                                                                                                                          |
|                                                 | Overall          | 1/1432 ( <0.1%)   | 160935                                                                                                                                                                          |
| Arthralgia                                      | 1st year         | 15/1432 ( 1.0%)   | 120104, 120411, 160119, 160557, 160609, 160624,<br>160801, 180642, 241167, 241605, 242307, 243231,<br>243933, 245932, 245933                                                    |
|                                                 | 2nd year         | 4/1166 ( 0.3%)    | 230501, 244918, 245431, 245910                                                                                                                                                  |
|                                                 | 3rd year         | 3/ 963 ( 0.3%)    | 150149, 243219, 245933                                                                                                                                                          |
|                                                 | Overall          | 21/1432 ( 1.5%)   | 120104, 120411, 150149, 160119, 160557, 160609,<br>160624, 160801, 180642, 230501, 241167, 241605,<br>242307, 243219, 243231, 243933, 244918, 245431,<br>245910, 245932, 245933 |
| Arthritis                                       | 2nd year         | 1/1166 ( <0.1%)   | 200303                                                                                                                                                                          |
|                                                 | Overall          | 1/1432 ( <0.1%)   | 200303                                                                                                                                                                          |



**Table 14.3.1 / 10: Number of subjects with adverse events including subject identifier and year by treatment (FAS)**

| TREATMENT: LCS12           |               |                 |                                                                                                                                                                                                                                                                                                                                                                                                                                                                                        |
|----------------------------|---------------|-----------------|----------------------------------------------------------------------------------------------------------------------------------------------------------------------------------------------------------------------------------------------------------------------------------------------------------------------------------------------------------------------------------------------------------------------------------------------------------------------------------------|
| Primary system organ class |               |                 |                                                                                                                                                                                                                                                                                                                                                                                                                                                                                        |
| Preferred term             | YEAR OF ONSET | N (%)           | subject identifier                                                                                                                                                                                                                                                                                                                                                                                                                                                                     |
| MedDRA version 14.0        |               |                 |                                                                                                                                                                                                                                                                                                                                                                                                                                                                                        |
| Back pain                  | 1st year      | 32/1432 ( 2.2%) | 120310, 120414, 120608, 120630, 140215, 160205, 160541, 160624, 160637, 160705, 161218, 161301, 170402, 170606, 200802, 200910, 210514, 230310, 230809, 240627, 240814, 241015, 241131, 241518, 242506, 243224, 243702, 243978, 244511, 245702, 245803, 246217                                                                                                                                                                                                                         |
|                            | 2nd year      | 11/1166 ( 0.9%) | 120320, 140608, 150109, 160217, 160624, 160720, 180734, 242812, 243616, 244412, 244610                                                                                                                                                                                                                                                                                                                                                                                                 |
|                            | 3rd year      | 18/ 963 ( 1.9%) | 120335, 120621, 140507, 150142, 160105, 160110, 160328, 160427, 160626, 160944, 160954, 160973, 161403, 161435, 241507, 241606, 244407, 244412                                                                                                                                                                                                                                                                                                                                         |
|                            | Overall       | 59/1432 ( 4.1%) | 120310, 120320, 120335, 120414, 120608, 120621, 120630, 140215, 140507, 140608, 150109, 150142, 160105, 160110, 160205, 160217, 160328, 160427, 160541, 160624, 160626, 160637, 160705, 160720, 160944, 160954, 160973, 161218, 161301, 161403, 161435, 170402, 170606, 180734, 200802, 200910, 210514, 230310, 230809, 240627, 240814, 241015, 241131, 241507, 241518, 241606, 242506, 242812, 243224, 243616, 243702, 243978, 244407, 244412, 244511, 244610, 245702, 245803, 246217 |
|                            |               |                 |                                                                                                                                                                                                                                                                                                                                                                                                                                                                                        |
| Bone pain                  | 1st year      | 1/1432 (<0.1%)  | 161440                                                                                                                                                                                                                                                                                                                                                                                                                                                                                 |
|                            | Overall       | 1/1432 (<0.1%)  | 161440                                                                                                                                                                                                                                                                                                                                                                                                                                                                                 |
| Bursitis                   | 1st year      | 1/1432 (<0.1%)  | 242812                                                                                                                                                                                                                                                                                                                                                                                                                                                                                 |
|                            | 2nd year      | 1/1166 (<0.1%)  | 160520                                                                                                                                                                                                                                                                                                                                                                                                                                                                                 |
|                            | Overall       | 2/1432 ( 0.1%)  | 160520, 242812                                                                                                                                                                                                                                                                                                                                                                                                                                                                         |
| Costochondritis            | 1st year      | 1/1432 (<0.1%)  | 244809                                                                                                                                                                                                                                                                                                                                                                                                                                                                                 |
|                            | 2nd year      | 2/1166 ( 0.2%)  | 242206, 244430                                                                                                                                                                                                                                                                                                                                                                                                                                                                         |
|                            | Overall       | 3/1432 ( 0.2%)  | 242206, 244430, 244809                                                                                                                                                                                                                                                                                                                                                                                                                                                                 |
| Exostosis                  | 1st year      | 1/1432 (<0.1%)  | 244407                                                                                                                                                                                                                                                                                                                                                                                                                                                                                 |
|                            | Overall       | 1/1432 (<0.1%)  | 244407                                                                                                                                                                                                                                                                                                                                                                                                                                                                                 |

**Table 14.3.1 / 10: Number of subjects with adverse events including subject identifier and year by treatment (FAS)**

TREATMENT: LCS12

Primary system organ class

| Preferred term<br>MedDRA version 14.0 | YEAR OF<br>ONSET | N (%)           | subject identifier                     |
|---------------------------------------|------------------|-----------------|----------------------------------------|
| Fibromyalgia                          | 1st year         | 1/1432 ( <0.1%) | 241174                                 |
|                                       | Overall          | 1/1432 ( <0.1%) | 241174                                 |
| Flank pain                            | 1st year         | 1/1432 ( <0.1%) | 240704                                 |
|                                       | 2nd year         | 1/1166 ( <0.1%) | 140808                                 |
|                                       | Overall          | 2/1432 ( 0.1%)  | 140808, 240704                         |
| Groin pain                            | 1st year         | 2/1432 ( 0.1%)  | 160130, 245914                         |
|                                       | Overall          | 2/1432 ( 0.1%)  | 160130, 245914                         |
| Intervertebral disc disorder          | 1st year         | 1/1432 ( <0.1%) | 140301                                 |
|                                       | Overall          | 1/1432 ( <0.1%) | 140301                                 |
| Intervertebral disc protrusion        | 3rd year         | 1/ 963 ( 0.1%)  | 160803                                 |
|                                       | Overall          | 1/1432 ( <0.1%) | 160803                                 |
| Joint effusion                        | 1st year         | 1/1432 ( <0.1%) | 240716                                 |
|                                       | Overall          | 1/1432 ( <0.1%) | 240716                                 |
| Joint instability                     | 1st year         | 1/1432 ( <0.1%) | 230613                                 |
|                                       | Overall          | 1/1432 ( <0.1%) | 230613                                 |
| Joint swelling                        | 3rd year         | 1/ 963 ( 0.1%)  | 244707                                 |
|                                       | Overall          | 1/1432 ( <0.1%) | 244707                                 |
| Medial tibial stress syndrome         | 1st year         | 1/1432 ( <0.1%) | 241424                                 |
|                                       | 2nd year         | 1/1166 ( <0.1%) | 161440                                 |
|                                       | Overall          | 2/1432 ( 0.1%)  | 161440, 241424                         |
| Muscle contracture                    | 3rd year         | 1/ 963 ( 0.1%)  | 120602                                 |
|                                       | Overall          | 1/1432 ( <0.1%) | 120602                                 |
| Muscle spasms                         | 1st year         | 3/1432 ( 0.2%)  | 161517, 200904, 245702                 |
|                                       | 2nd year         | 2/1166 ( 0.2%)  | 241513, 244511                         |
|                                       | Overall          | 5/1432 ( 0.3%)  | 161517, 200904, 241513, 244511, 245702 |

**Table 14.3.1 / 10: Number of subjects with adverse events including subject identifier and year by treatment (FAS)**

| TREATMENT: LCS12             |               |                 |                                                                                                |
|------------------------------|---------------|-----------------|------------------------------------------------------------------------------------------------|
| Primary system organ class   |               |                 |                                                                                                |
| Preferred term               | YEAR OF ONSET | N (%)           | subject identifier                                                                             |
| MedDRA version 14.0          |               |                 |                                                                                                |
| Muscle tightness             | 1st year      | 4/1432 ( 0.3%)  | 141421, 160427, 160601, 161420                                                                 |
|                              | 2nd year      | 3/1166 ( 0.3%)  | 160328, 161305, 161313                                                                         |
|                              | 3rd year      | 1/ 963 ( 0.1%)  | 161301                                                                                         |
|                              | Overall       | 8/1432 ( 0.6%)  | 141421, 160328, 160427, 160601, 161301, 161305, 161313, 161420                                 |
| Musculoskeletal chest pain   | 3rd year      | 2/ 963 ( 0.2%)  | 244412, 245528                                                                                 |
|                              | Overall       | 2/1432 ( 0.1%)  | 244412, 245528                                                                                 |
| Musculoskeletal pain         | 1st year      | 6/1432 ( 0.4%)  | 160129, 160624, 160625, 160756, 241142, 242307                                                 |
|                              | 2nd year      | 1/1166 ( <0.1%) | 161221                                                                                         |
|                              | 3rd year      | 2/ 963 ( 0.2%)  | 242906, 244707                                                                                 |
|                              | Overall       | 9/1432 ( 0.6%)  | 160129, 160624, 160625, 160756, 161221, 241142, 242307, 242906, 244707                         |
| Myalgia                      | 1st year      | 7/1432 ( 0.5%)  | 120604, 140921, 161017, 210136, 241807, 243958, 244509                                         |
|                              | 2nd year      | 2/1166 ( 0.2%)  | 140105, 160569                                                                                 |
|                              | 3rd year      | 1/ 963 ( 0.1%)  | 160569                                                                                         |
|                              | Overall       | 9/1432 ( 0.6%)  | 120604, 140105, 140921, 160569, 161017, 210136, 241807, 243958, 244509                         |
| Neck pain                    | 1st year      | 3/1432 ( 0.2%)  | 140212, 190228, 240622                                                                         |
|                              | 2nd year      | 5/1166 ( 0.4%)  | 120119, 161440, 210201, 230115, 244511                                                         |
|                              | 3rd year      | 4/ 963 ( 0.4%)  | 120315, 120320, 120611, 120621                                                                 |
|                              | Overall       | 12/1432 ( 0.8%) | 120119, 120315, 120320, 120611, 120621, 140212, 161440, 190228, 210201, 230115, 240622, 244511 |
| Osteitis                     | 1st year      | 1/1432 ( <0.1%) | 200904                                                                                         |
|                              | 2nd year      | 1/1166 ( <0.1%) | 180652                                                                                         |
|                              | Overall       | 2/1432 ( 0.1%)  | 180652, 200904                                                                                 |
| Pain in extremity            | 1st year      | 4/1432 ( 0.3%)  | 140304, 160801, 200709, 244117                                                                 |
|                              | 2nd year      | 1/1166 ( <0.1%) | 161301                                                                                         |
|                              | 3rd year      | 1/ 963 ( 0.1%)  | 244105                                                                                         |
|                              | Overall       | 6/1432 ( 0.4%)  | 140304, 160801, 161301, 200709, 244105, 244117                                                 |
| Patellofemoral pain syndrome | 1st year      | 1/1432 ( <0.1%) | 161421                                                                                         |
|                              | Overall       | 1/1432 ( <0.1%) | 161421                                                                                         |

**Table 14.3.1 / 10: Number of subjects with adverse events including subject identifier and year by treatment (FAS)**

TREATMENT: LCS12

Primary system organ class

| Preferred term<br>MedDRA version 14.0                               | YEAR OF<br>ONSET | N (%)           | subject identifier                     |
|---------------------------------------------------------------------|------------------|-----------------|----------------------------------------|
| Psoriatic arthropathy                                               | 3rd year         | 1/ 963 ( 0.1%)  | 231012                                 |
|                                                                     | Overall          | 1/1432 ( <0.1%) | 231012                                 |
| Rotator cuff syndrome                                               | 1st year         | 1/1432 ( <0.1%) | 160110                                 |
|                                                                     | Overall          | 1/1432 ( <0.1%) | 160110                                 |
| Scleroderma                                                         | 2nd year         | 1/1166 ( <0.1%) | 161301                                 |
|                                                                     | Overall          | 1/1432 ( <0.1%) | 161301                                 |
| Spinal osteoarthritis                                               | 2nd year         | 1/1166 ( <0.1%) | 180605                                 |
|                                                                     | Overall          | 1/1432 ( <0.1%) | 180605                                 |
| Synovitis                                                           | 1st year         | 1/1432 ( <0.1%) | 180642                                 |
|                                                                     | Overall          | 1/1432 ( <0.1%) | 180642                                 |
| Temporomandibular joint syndrome                                    | 1st year         | 1/1432 ( <0.1%) | 150145                                 |
|                                                                     | Overall          | 1/1432 ( <0.1%) | 150145                                 |
| Tendon pain                                                         | 2nd year         | 1/1166 ( <0.1%) | 161440                                 |
|                                                                     | Overall          | 1/1432 ( <0.1%) | 161440                                 |
| Tendonitis                                                          | 1st year         | 3/1432 ( 0.2%)  | 180715, 200528, 244402                 |
|                                                                     | 2nd year         | 2/1166 ( 0.2%)  | 200709, 240712                         |
|                                                                     | Overall          | 5/1432 ( 0.3%)  | 180715, 200528, 200709, 240712, 244402 |
| Torticollis                                                         | 1st year         | 1/1432 ( <0.1%) | 161109                                 |
|                                                                     | Overall          | 1/1432 ( <0.1%) | 161109                                 |
| Neoplasms benign, malignant and unspecified (incl cysts and polyps) | 1st year         | 20/1432 ( 1.4%) |                                        |
|                                                                     | 2nd year         | 14/1166 ( 1.2%) |                                        |
|                                                                     | 3rd year         | 14/ 963 ( 1.5%) |                                        |
|                                                                     | Overall          | 45/1432 ( 3.1%) |                                        |
| Acrochordon                                                         | 2nd year         | 1/1166 ( <0.1%) | 241706                                 |
|                                                                     | Overall          | 1/1432 ( <0.1%) | 241706                                 |

**Table 14.3.1 / 10: Number of subjects with adverse events including subject identifier and year by treatment (FAS)**

TREATMENT: LCS12

Primary system organ class

| Preferred term<br>MedDRA version 14.0 | YEAR OF<br>ONSET | N (%)           | subject identifier                                     |
|---------------------------------------|------------------|-----------------|--------------------------------------------------------|
| Acute leukaemia                       | 3rd year         | 1/ 963 ( 0.1%)  | 246212                                                 |
|                                       | Overall          | 1/1432 ( <0.1%) | 246212                                                 |
| Astrocytoma, low grade                | 1st year         | 1/1432 ( <0.1%) | 160329                                                 |
|                                       | Overall          | 1/1432 ( <0.1%) | 160329                                                 |
| Benign breast neoplasm                | 1st year         | 1/1432 ( <0.1%) | 244119                                                 |
|                                       | 2nd year         | 1/1166 ( <0.1%) | 160904                                                 |
|                                       | Overall          | 2/1432 ( 0.1%)  | 160904, 244119                                         |
| Cervicitis human papilloma virus      | 3rd year         | 1/ 963 ( 0.1%)  | 161406                                                 |
|                                       | Overall          | 1/1432 ( <0.1%) | 161406                                                 |
| Cervix neoplasm                       | 3rd year         | 1/ 963 ( 0.1%)  | 190225                                                 |
|                                       | Overall          | 1/1432 ( <0.1%) | 190225                                                 |
| Fibroadenoma of breast                | 1st year         | 2/1432 ( 0.1%)  | 170407, 242806                                         |
|                                       | 2nd year         | 4/1166 ( 0.3%)  | 230804, 240622, 241531, 244509                         |
|                                       | 3rd year         | 3/ 963 ( 0.3%)  | 170407, 242806, 243916                                 |
|                                       | Overall          | 7/1432 ( 0.5%)  | 170407, 230804, 240622, 241531, 242806, 243916, 244509 |
| Glomus tumour                         | 1st year         | 1/1432 ( <0.1%) | 230401                                                 |
|                                       | 2nd year         | 1/1166 ( <0.1%) | 230401                                                 |
|                                       | Overall          | 1/1432 ( <0.1%) | 230401                                                 |
| Haemangioma                           | 1st year         | 1/1432 ( <0.1%) | 243965                                                 |
|                                       | Overall          | 1/1432 ( <0.1%) | 243965                                                 |
| Lipoma of breast                      | 2nd year         | 2/1166 ( 0.2%)  | 160928, 242906                                         |
|                                       | Overall          | 2/1432 ( 0.1%)  | 160928, 242906                                         |
| Melanocytic naevus                    | 1st year         | 4/1432 ( 0.3%)  | 161421, 161436, 161437, 245911                         |
|                                       | 2nd year         | 1/1166 ( <0.1%) | 241414                                                 |
|                                       | 3rd year         | 1/ 963 ( 0.1%)  | 242712                                                 |
|                                       | Overall          | 6/1432 ( 0.4%)  | 161421, 161436, 161437, 241414, 242712, 245911         |

**Table 14.3.1 / 10: Number of subjects with adverse events including subject identifier and year by treatment (FAS)**

TREATMENT: LCS12

Primary system organ class

| Preferred term<br>MedDRA version 14.0        | YEAR OF<br>ONSET | N (%)             | subject identifier                                             |
|----------------------------------------------|------------------|-------------------|----------------------------------------------------------------|
| Ovarian germ cell teratoma benign            | 1st year         | 3/1432 ( 0.2%)    | 140808, 161431, 244448                                         |
|                                              | 3rd year         | 2/ 963 ( 0.2%)    | 160317, 161114                                                 |
|                                              | Overall          | 5/1432 ( 0.3%)    | 140808, 160317, 161114, 161431, 244448                         |
| Skin papilloma                               | 1st year         | 1/1432 ( <0.1%)   | 140518                                                         |
|                                              | Overall          | 1/1432 ( <0.1%)   | 140518                                                         |
| Thyroid cancer                               | 2nd year         | 1/1166 ( <0.1%)   | 241153                                                         |
|                                              | 3rd year         | 1/ 963 ( 0.1%)    | 160519                                                         |
|                                              | Overall          | 2/1432 ( 0.1%)    | 160519, 241153                                                 |
| Uterine leiomyoma                            | 1st year         | 4/1432 ( 0.3%)    | 120242, 240841, 241190, 244132                                 |
|                                              | 2nd year         | 3/1166 ( 0.3%)    | 160606, 180740, 244109                                         |
|                                              | 3rd year         | 1/ 963 ( 0.1%)    | 200207                                                         |
|                                              | Overall          | 8/1432 ( 0.6%)    | 120242, 160606, 180740, 200207, 240841, 241190, 244109, 244132 |
| Vulvovaginal human papilloma virus infection | 1st year         | 2/1432 ( 0.1%)    | 160609, 243830                                                 |
|                                              | 3rd year         | 3/ 963 ( 0.3%)    | 150112, 160418, 161512                                         |
|                                              | Overall          | 5/1432 ( 0.3%)    | 150112, 160418, 160609, 161512, 243830                         |
| Nervous system disorders                     | 1st year         | 154/1432 ( 10.8%) |                                                                |
|                                              | 2nd year         | 44/1166 ( 3.8%)   |                                                                |
|                                              | 3rd year         | 27/ 963 ( 2.8%)   |                                                                |
|                                              | Overall          | 200/1432 ( 14.0%) |                                                                |
| Amnesia                                      | 1st year         | 1/1432 ( <0.1%)   | 243950                                                         |
|                                              | Overall          | 1/1432 ( <0.1%)   | 243950                                                         |
| Burning sensation                            | 1st year         | 1/1432 ( <0.1%)   | 120634                                                         |
|                                              | Overall          | 1/1432 ( <0.1%)   | 120634                                                         |
| Carpal tunnel syndrome                       | 3rd year         | 1/ 963 ( 0.1%)    | 140105                                                         |
|                                              | Overall          | 1/1432 ( <0.1%)   | 140105                                                         |
| Cervicogenic headache                        | 2nd year         | 1/1166 ( <0.1%)   | 140802                                                         |
|                                              | Overall          | 1/1432 ( <0.1%)   | 140802                                                         |

**Table 14.3.1 / 10: Number of subjects with adverse events including subject identifier and year by treatment (FAS)**

TREATMENT: LCS12

Primary system organ class

| Preferred term<br>MedDRA version 14.0 | YEAR OF<br>ONSET | N (%)           | subject identifier                                                        |
|---------------------------------------|------------------|-----------------|---------------------------------------------------------------------------|
| Convulsion                            | 2nd year         | 1/1166 ( <0.1%) | 241544                                                                    |
|                                       | Overall          | 1/1432 ( <0.1%) | 241544                                                                    |
|                                       |                  |                 |                                                                           |
| Dizziness                             | 1st year         | 7/1432 ( 0.5%)  | 140206, 140802, 141405, 160624, 200304, 244618,<br>246147                 |
|                                       | 2nd year         | 2/1166 ( 0.2%)  | 200112, 240739                                                            |
|                                       | Overall          | 9/1432 ( 0.6%)  | 140206, 140802, 141405, 160624, 200112, 200304,<br>240739, 244618, 246147 |
| Dizziness postural                    | 1st year         | 1/1432 ( <0.1%) | 244438                                                                    |
|                                       | Overall          | 1/1432 ( <0.1%) | 244438                                                                    |
| Facial spasm                          | 3rd year         | 1/ 963 ( 0.1%)  | 200521                                                                    |
|                                       | Overall          | 1/1432 ( <0.1%) | 200521                                                                    |

**Table 14.3.1 / 10: Number of subjects with adverse events including subject identifier and year by treatment (FAS)**

TREATMENT: LCS12

Primary system organ class

Preferred term

MedDRA version 14.0

|          | YEAR OF ONSET | N (%)            | subject identifier                                                                                                                                                                                                                                                                                                                                                                                                                                                                                                                                                                                                                                                                                                                                                                                                                             |
|----------|---------------|------------------|------------------------------------------------------------------------------------------------------------------------------------------------------------------------------------------------------------------------------------------------------------------------------------------------------------------------------------------------------------------------------------------------------------------------------------------------------------------------------------------------------------------------------------------------------------------------------------------------------------------------------------------------------------------------------------------------------------------------------------------------------------------------------------------------------------------------------------------------|
| Headache | 1st year      | 102/1432 ( 7.1%) | 120104, 120113, 120315, 120320, 120411, 120419, 120602, 120604, 120608, 120610, 120611, 120613, 120621, 120626, 120630, 120632, 140105, 140206, 140301, 140302, 140304, 140518, 140605, 140905, 141301, 150106, 160105, 160208, 160302, 160331, 160506, 160511, 160569, 160605, 160606, 160610, 160616, 160624, 160631, 160637, 160640, 160717, 160756, 160962, 161003, 161018, 161023, 161027, 161301, 161303, 161304, 161305, 161313, 161316, 161403, 161407, 161532, 161533, 170704, 180735, 180736, 190402, 190409, 200919, 210409, 210412, 210415, 230214, 230303, 230406, 230603, 230819, 230824, 240217, 240345, 240701, 241102, 241122, 241131, 241159, 241185, 241190, 241228, 241305, 241525, 242307, 242320, 242903, 243720, 243904, 243929, 243979, 244109, 244125, 244430, 244438, 244518, 244914, 245518, 245519, 245803, 245928 |
|          | 2nd year      | 29/1166 ( 2.5%)  | 120305, 120315, 120320, 120412, 120414, 120602, 140228, 140708, 150166, 160913, 161305, 161313, 180821, 190409, 190601, 200402, 200616, 200703, 210409, 230515, 230819, 231108, 240712, 242212, 243720, 244105, 244408, 244412, 244443                                                                                                                                                                                                                                                                                                                                                                                                                                                                                                                                                                                                         |
|          | 3rd year      | 15/ 963 ( 1.6%)  | 120307, 120320, 120630, 140210, 140518, 141032, 160218, 160525, 160605, 160613, 190205, 241302, 242302, 243702, 244407                                                                                                                                                                                                                                                                                                                                                                                                                                                                                                                                                                                                                                                                                                                         |
|          | Overall       | 133/1432 ( 9.3%) | 120104, 120113, 120305, 120307, 120315, 120320, 120411, 120412, 120414, 120419, 120602, 120604, 120608, 120610, 120611, 120613, 120621, 120626, 120630, 120632, 140105, 140206, 140210, 140228, 140301, 140302, 140304, 140518, 140605, 140708, 140905, 141032, 141301, 150106, 150166, 160105, 160208, 160218, 160302, 160331, 160506, 160511, 160525, 160569, 160605, 160606, 160610, 160613, 160616, 160624,                                                                                                                                                                                                                                                                                                                                                                                                                                |



**Table 14.3.1 / 10: Number of subjects with adverse events including subject identifier and year by treatment (FAS)**

TREATMENT: LCS12

Primary system organ class

| Preferred term<br>MedDRA version 14.0 | YEAR OF<br>ONSET |  | N (%)           | subject identifier                                                                                                                                                                                                                                                                                                                                                                                                                                                                                                                                                                                                                                                                                                                     |
|---------------------------------------|------------------|--|-----------------|----------------------------------------------------------------------------------------------------------------------------------------------------------------------------------------------------------------------------------------------------------------------------------------------------------------------------------------------------------------------------------------------------------------------------------------------------------------------------------------------------------------------------------------------------------------------------------------------------------------------------------------------------------------------------------------------------------------------------------------|
|                                       |                  |  |                 | 160631, 160637, 160640, 160717, 160756, 160913,<br>160962, 161003, 161018, 161023, 161027, 161301,<br>161303, 161304, 161305, 161313, 161316, 161403,<br>161407, 161532, 161533, 170704, 180735, 180736,<br>180821,<br>190205, 190402, 190409, 190601, 200402, 200616,<br>200703, 200919, 210409, 210412, 210415, 230214,<br>230303, 230406, 230515, 230603, 230819, 230824,<br>231108, 240217, 240345, 240701, 240712, 241102,<br>241122,<br>241131, 241159, 241185, 241190, 241228, 241302,<br>241305, 241525, 242212, 242302, 242307, 242320,<br>242903, 243702, 243720, 243904, 243929, 243979,<br>244105, 244109, 244125, 244407, 244408, 244412,<br>244430,<br>244438, 244443, 244518, 244914, 245518, 245519,<br>245803, 245928 |
| Hypoaesthesia                         | 1st year         |  | 1/1432 ( <0.1%) | 246147                                                                                                                                                                                                                                                                                                                                                                                                                                                                                                                                                                                                                                                                                                                                 |
|                                       | 2nd year         |  | 1/1166 ( <0.1%) | 244408                                                                                                                                                                                                                                                                                                                                                                                                                                                                                                                                                                                                                                                                                                                                 |
|                                       | Overall          |  | 2/1432 ( 0.1%)  | 244408, 246147                                                                                                                                                                                                                                                                                                                                                                                                                                                                                                                                                                                                                                                                                                                         |
| Migraine                              | 1st year         |  | 22/1432 ( 1.5%) | 140114, 160511, 160569, 161002, 161109, 170605,<br>200516, 200527, 200803, 230817, 240725, 241531,<br>241544, 241718, 242504, 243323, 243618, 243904,<br>244412, 244427, 244919, 245516                                                                                                                                                                                                                                                                                                                                                                                                                                                                                                                                                |
|                                       | 2nd year         |  | 5/1166 ( 0.4%)  | 120602, 160625, 161301, 240728, 245403                                                                                                                                                                                                                                                                                                                                                                                                                                                                                                                                                                                                                                                                                                 |
|                                       | 3rd year         |  | 8/ 963 ( 0.8%)  | 140105, 160625, 160637, 160738, 160960, 160981,<br>241159, 244408                                                                                                                                                                                                                                                                                                                                                                                                                                                                                                                                                                                                                                                                      |
|                                       | Overall          |  | 34/1432 ( 2.4%) | 120602, 140105, 140114, 160511, 160569, 160625,<br>160637, 160738, 160960, 160981, 161002, 161109,<br>161301, 170605, 200516, 200527, 200803, 230817,<br>240725, 240728, 241159, 241531, 241544, 241718,<br>242504,<br>243323, 243618, 243904, 244408, 244412, 244427,<br>244919, 245403, 245516                                                                                                                                                                                                                                                                                                                                                                                                                                       |
| Migraine with aura                    | 1st year         |  | 3/1432 ( 0.2%)  | 200703, 241530, 245508                                                                                                                                                                                                                                                                                                                                                                                                                                                                                                                                                                                                                                                                                                                 |
|                                       | 2nd year         |  | 1/1166 ( <0.1%) | 161102                                                                                                                                                                                                                                                                                                                                                                                                                                                                                                                                                                                                                                                                                                                                 |
|                                       | Overall          |  | 4/1432 ( 0.3%)  | 161102, 200703, 241530, 245508                                                                                                                                                                                                                                                                                                                                                                                                                                                                                                                                                                                                                                                                                                         |

**Table 14.3.1 / 10: Number of subjects with adverse events including subject identifier and year by treatment (FAS)**

| TREATMENT: LCS12           |               |                 |                                                |
|----------------------------|---------------|-----------------|------------------------------------------------|
| Primary system organ class |               |                 |                                                |
| Preferred term             | YEAR OF ONSET | N (%)           | subject identifier                             |
| MedDRA version 14.0        |               |                 |                                                |
| Migraine without aura      | 1st year      | 1/1432 ( <0.1%) | 241551                                         |
|                            | Overall       | 1/1432 ( <0.1%) | 241551                                         |
| Morton's neuralgia         | 2nd year      | 1/1166 ( <0.1%) | 200614                                         |
|                            | Overall       | 1/1432 ( <0.1%) | 200614                                         |
| Multiple sclerosis         | 3rd year      | 1/ 963 ( 0.1%)  | 160637                                         |
|                            | Overall       | 1/1432 ( <0.1%) | 160637                                         |
| Nerve compression          | 2nd year      | 1/1166 ( <0.1%) | 244711                                         |
|                            | 3rd year      | 1/ 963 ( 0.1%)  | 244407                                         |
|                            | Overall       | 2/1432 ( 0.1%)  | 244407, 244711                                 |
| Presyncope                 | 1st year      | 4/1432 ( 0.3%)  | 140521, 160985, 170609, 200613                 |
|                            | Overall       | 4/1432 ( 0.3%)  | 140521, 160985, 170609, 200613                 |
| Restless legs syndrome     | 1st year      | 1/1432 ( <0.1%) | 230401                                         |
|                            | Overall       | 1/1432 ( <0.1%) | 230401                                         |
| Sciatica                   | 1st year      | 3/1432 ( 0.2%)  | 161112, 170605, 200612                         |
|                            | 2nd year      | 1/1166 ( <0.1%) | 180733                                         |
|                            | Overall       | 4/1432 ( 0.3%)  | 161112, 170605, 180733, 200612                 |
| Sinus headache             | 1st year      | 1/1432 ( <0.1%) | 244511                                         |
|                            | Overall       | 1/1432 ( <0.1%) | 244511                                         |
| Somnolence                 | 1st year      | 2/1432 ( 0.1%)  | 120335, 140114                                 |
|                            | Overall       | 2/1432 ( 0.1%)  | 120335, 140114                                 |
| Status migrainosus         | 1st year      | 1/1432 ( <0.1%) | 242807                                         |
|                            | Overall       | 1/1432 ( <0.1%) | 242807                                         |
| Syncope                    | 1st year      | 6/1432 ( 0.4%)  | 120619, 200412, 200908, 200923, 245701, 245710 |
|                            | Overall       | 6/1432 ( 0.4%)  | 120619, 200412, 200908, 200923, 245701, 245710 |

**Table 14.3.1 / 10: Number of subjects with adverse events including subject identifier and year by treatment (FAS)**

TREATMENT: LCS12

Primary system organ class

| Preferred term<br>MedDRA version 14.0          | YEAR OF<br>ONSET | N (%)             | subject identifier                                                                             |
|------------------------------------------------|------------------|-------------------|------------------------------------------------------------------------------------------------|
| Tension headache                               | 1st year         | 6/1432 ( 0.4%)    | 150125, 150166, 161312, 241718, 243206, 243231                                                 |
|                                                | 2nd year         | 3/1166 ( 0.3%)    | 150104, 242816, 243213                                                                         |
|                                                | 3rd year         | 3/ 963 ( 0.3%)    | 161313, 230216, 245506                                                                         |
|                                                | Overall          | 12/1432 ( 0.8%)   | 150104, 150125, 150166, 161312, 161313, 230216, 241718, 242816, 243206, 243213, 243231, 245506 |
|                                                |                  |                   |                                                                                                |
| Thoracic outlet syndrome                       | 2nd year         | 1/1166 ( <0.1%)   | 200614                                                                                         |
|                                                | Overall          | 1/1432 ( <0.1%)   | 200614                                                                                         |
| VIth nerve paralysis                           | 1st year         | 2/1432 ( 0.1%)    | 160511, 190221                                                                                 |
|                                                | Overall          | 2/1432 ( 0.1%)    | 160511, 190221                                                                                 |
| Pregnancy, puerperium and perinatal conditions | 1st year         | 3/1432 ( 0.2%)    |                                                                                                |
|                                                | 2nd year         | 2/1166 ( 0.2%)    |                                                                                                |
|                                                | 3rd year         | 1/ 963 ( 0.1%)    |                                                                                                |
|                                                | Overall          | 6/1432 ( 0.4%)    |                                                                                                |
| Abortion spontaneous                           | 1st year         | 1/1432 ( <0.1%)   | 245003                                                                                         |
|                                                | 2nd year         | 1/1166 ( <0.1%)   | 190636                                                                                         |
|                                                | 3rd year         | 1/ 963 ( 0.1%)    | 140202                                                                                         |
|                                                | Overall          | 3/1432 ( 0.2%)    | 140202, 190636, 245003                                                                         |
| Ectopic pregnancy                              | 1st year         | 2/1432 ( 0.1%)    | 120419, 160743                                                                                 |
|                                                | 2nd year         | 1/1166 ( <0.1%)   | 230303                                                                                         |
|                                                | Overall          | 3/1432 ( 0.2%)    | 120419, 160743, 230303                                                                         |
| Premature separation of placenta               | 2nd year         | 1/1166 ( <0.1%)   | 190636                                                                                         |
|                                                | Overall          | 1/1432 ( <0.1%)   | 190636                                                                                         |
| Psychiatric disorders                          | 1st year         | 107/1432 ( 7.5%)  |                                                                                                |
|                                                | 2nd year         | 55/1166 ( 4.7%)   |                                                                                                |
|                                                | 3rd year         | 26/ 963 ( 2.7%)   |                                                                                                |
|                                                | Overall          | 173/1432 ( 12.1%) |                                                                                                |
| Adjustment disorder                            | 1st year         | 1/1432 ( <0.1%)   | 140817                                                                                         |
|                                                | Overall          | 1/1432 ( <0.1%)   | 140817                                                                                         |

**Table 14.3.1 / 10: Number of subjects with adverse events including subject identifier and year by treatment (FAS)**

TREATMENT: LCS12

Primary system organ class

| Preferred term<br>MedDRA version 14.0    | YEAR OF<br>ONSET | N (%)           | subject identifier                                                                                                                                                                                                                                                                                     |
|------------------------------------------|------------------|-----------------|--------------------------------------------------------------------------------------------------------------------------------------------------------------------------------------------------------------------------------------------------------------------------------------------------------|
| Affect lability                          | 1st year         | 2/1432 ( 0.1%)  | 140808, 200923                                                                                                                                                                                                                                                                                         |
|                                          | 2nd year         | 2/1166 ( 0.2%)  | 244931, 245910                                                                                                                                                                                                                                                                                         |
|                                          | Overall          | 4/1432 ( 0.3%)  | 140808, 200923, 244931, 245910                                                                                                                                                                                                                                                                         |
|                                          |                  |                 |                                                                                                                                                                                                                                                                                                        |
| Aggression                               | 1st year         | 1/1432 ( <0.1%) | 140114                                                                                                                                                                                                                                                                                                 |
|                                          | Overall          | 1/1432 ( <0.1%) | 140114                                                                                                                                                                                                                                                                                                 |
| Anxiety                                  | 1st year         | 17/1432 ( 1.2%) | 140807, 240209, 240217, 240510, 240704, 241142, 242818, 243121, 243913, 243965, 244608, 245024, 245027, 245411, 245514, 245910, 245923                                                                                                                                                                 |
|                                          | 2nd year         | 13/1166 ( 1.1%) | 120632, 140507, 141028, 210519, 230720, 240337, 240634, 241015, 241531, 243904, 243946, 244918, 245904                                                                                                                                                                                                 |
|                                          | 3rd year         | 9/ 963 ( 0.9%)  | 120630, 150153, 230720, 240505, 242818, 244412, 244430, 244613, 245410                                                                                                                                                                                                                                 |
|                                          | Overall          | 37/1432 ( 2.6%) | 120630, 120632, 140507, 140807, 141028, 150153, 210519, 230720, 240209, 240217, 240337, 240505, 240510, 240634, 240704, 241015, 241142, 241531, 242818, 243121, 243904, 243913, 243946, 243965, 244412, 244430, 244608, 244613, 244918, 245024, 245027, 245410, 245411, 245514, 245904, 245910, 245923 |
|                                          |                  |                 |                                                                                                                                                                                                                                                                                                        |
| Anxiety disorder                         | 3rd year         | 1/ 963 ( 0.1%)  | 180511                                                                                                                                                                                                                                                                                                 |
|                                          | Overall          | 1/1432 ( <0.1%) | 180511                                                                                                                                                                                                                                                                                                 |
| Attention deficit/hyperactivity disorder | 1st year         | 1/1432 ( <0.1%) | 241414                                                                                                                                                                                                                                                                                                 |
|                                          | 2nd year         | 1/1166 ( <0.1%) | 200115                                                                                                                                                                                                                                                                                                 |
|                                          | 3rd year         | 2/ 963 ( 0.2%)  | 244412, 244428                                                                                                                                                                                                                                                                                         |
|                                          | Overall          | 4/1432 ( 0.3%)  | 200115, 241414, 244412, 244428                                                                                                                                                                                                                                                                         |
| Bipolar I disorder                       | 1st year         | 1/1432 ( <0.1%) | 241174                                                                                                                                                                                                                                                                                                 |
|                                          | Overall          | 1/1432 ( <0.1%) | 241174                                                                                                                                                                                                                                                                                                 |
| Bipolar disorder                         | 2nd year         | 1/1166 ( <0.1%) | 240116                                                                                                                                                                                                                                                                                                 |
|                                          | Overall          | 1/1432 ( <0.1%) | 240116                                                                                                                                                                                                                                                                                                 |
| Burnout syndrome                         | 1st year         | 1/1432 ( <0.1%) | 160509                                                                                                                                                                                                                                                                                                 |
|                                          | Overall          | 1/1432 ( <0.1%) | 160509                                                                                                                                                                                                                                                                                                 |

**Table 14.3.1 / 10: Number of subjects with adverse events including subject identifier and year by treatment (FAS)**

TREATMENT: LCS12

Primary system organ class

| Preferred term<br>MedDRA version 14.0 | YEAR OF<br>ONSET | N (%)           | subject identifier                                                                                                                                                                                                                                                                                                                                                                                                     |
|---------------------------------------|------------------|-----------------|------------------------------------------------------------------------------------------------------------------------------------------------------------------------------------------------------------------------------------------------------------------------------------------------------------------------------------------------------------------------------------------------------------------------|
| Daydreaming                           | 2nd year         | 1/1166 ( <0.1%) | 243611                                                                                                                                                                                                                                                                                                                                                                                                                 |
|                                       | Overall          | 1/1432 ( <0.1%) | 243611                                                                                                                                                                                                                                                                                                                                                                                                                 |
| Depressed mood                        | 1st year         | 4/1432 ( 0.3%)  | 141301, 141426, 230214, 242917                                                                                                                                                                                                                                                                                                                                                                                         |
|                                       | 2nd year         | 1/1166 ( <0.1%) | 160734                                                                                                                                                                                                                                                                                                                                                                                                                 |
|                                       | Overall          | 5/1432 ( 0.3%)  | 141301, 141426, 160734, 230214, 242917                                                                                                                                                                                                                                                                                                                                                                                 |
| Depression                            | 1st year         | 27/1432 ( 1.9%) | 140817, 141034, 150109, 150128, 160431, 160434, 160550, 160605, 160806, 160905, 160935, 161221, 200619, 210203, 210404, 230310, 240352, 240644, 241108, 241119, 241531, 241541, 241717, 241718, 243821, 243950, 244402                                                                                                                                                                                                 |
|                                       | 2nd year         | 18/1166 ( 1.5%) | 120417, 140520, 141402, 141419, 160329, 160509, 170410, 230720, 241541, 243103, 243611, 243830, 243946, 243973, 244417, 244422, 244918, 245808                                                                                                                                                                                                                                                                         |
|                                       | 3rd year         | 8/ 963 ( 0.8%)  | 150138, 150166, 150202, 161403, 161513, 210411, 230720, 243907                                                                                                                                                                                                                                                                                                                                                         |
|                                       | Overall          | 51/1432 ( 3.6%) | 120417, 140520, 140817, 141034, 141402, 141419, 150109, 150128, 150138, 150166, 150202, 160329, 160431, 160434, 160509, 160550, 160605, 160806, 160905, 160935, 161221, 161403, 161513, 170410, 200619, 210203, 210404, 210411, 230310, 230720, 240352, 240644, 241108, 241119, 241531, 241541, 241717, 241718, 243103, 243611, 243821, 243830, 243907, 243946, 243950, 243973, 244402, 244417, 244422, 244918, 245808 |
| Depression suicidal                   | 2nd year         | 1/1166 ( <0.1%) | 244422                                                                                                                                                                                                                                                                                                                                                                                                                 |
|                                       | Overall          | 1/1432 ( <0.1%) | 244422                                                                                                                                                                                                                                                                                                                                                                                                                 |
| Depressive symptom                    | 1st year         | 1/1432 ( <0.1%) | 230714                                                                                                                                                                                                                                                                                                                                                                                                                 |
|                                       | Overall          | 1/1432 ( <0.1%) | 230714                                                                                                                                                                                                                                                                                                                                                                                                                 |
| Drug dependence                       | 1st year         | 1/1432 ( <0.1%) | 241708                                                                                                                                                                                                                                                                                                                                                                                                                 |
|                                       | Overall          | 1/1432 ( <0.1%) | 241708                                                                                                                                                                                                                                                                                                                                                                                                                 |

**Table 14.3.1 / 10: Number of subjects with adverse events including subject identifier and year by treatment (FAS)**

TREATMENT: LCS12

Primary system organ class

| Preferred term<br>MedDRA version 14.0 | YEAR OF<br>ONSET | N (%)           | subject identifier                                                                                                                                                                                                     |
|---------------------------------------|------------------|-----------------|------------------------------------------------------------------------------------------------------------------------------------------------------------------------------------------------------------------------|
| Fear                                  | 3rd year         | 1/ 963 ( 0.1%)  | 160551                                                                                                                                                                                                                 |
|                                       | Overall          | 1/1432 ( <0.1%) | 160551                                                                                                                                                                                                                 |
| Generalised anxiety disorder          | 1st year         | 3/1432 ( 0.2%)  | 161026, 243302, 243502                                                                                                                                                                                                 |
|                                       | Overall          | 3/1432 ( 0.2%)  | 161026, 243302, 243502                                                                                                                                                                                                 |
| Hallucination, auditory               | 1st year         | 1/1432 ( <0.1%) | 140114                                                                                                                                                                                                                 |
|                                       | Overall          | 1/1432 ( <0.1%) | 140114                                                                                                                                                                                                                 |
| Insomnia                              | 1st year         | 16/1432 ( 1.1%) | 140807, 160110, 161411, 190203, 210203, 230117, 230401, 230720, 240217, 240505, 241174, 241405, 243323, 243617, 243950, 244417                                                                                         |
|                                       | 2nd year         | 4/1166 ( 0.3%)  | 120310, 140802, 161440, 231107                                                                                                                                                                                         |
|                                       | 3rd year         | 3/ 963 ( 0.3%)  | 160904, 240505, 243907                                                                                                                                                                                                 |
|                                       | Overall          | 22/1432 ( 1.5%) | 120310, 140802, 140807, 160110, 160904, 161411, 161440, 190203, 210203, 230117, 230401, 230720, 231107, 240217, 240505, 241174, 241405, 243323, 243617, 243907, 243950, 244417                                         |
|                                       |                  |                 |                                                                                                                                                                                                                        |
| Libido decreased                      | 1st year         | 18/1432 ( 1.3%) | 140113, 140813, 160522, 161303, 200919, 210120, 230122, 230824, 240401, 241102, 241149, 241174, 241193, 243026, 243929, 244443, 245027, 245531                                                                         |
|                                       | 2nd year         | 8/1166 ( 0.7%)  | 161002, 170801, 240401, 243103, 243314, 244430, 244522, 244918                                                                                                                                                         |
|                                       | 3rd year         | 2/ 963 ( 0.2%)  | 180620, 230804                                                                                                                                                                                                         |
|                                       | Overall          | 27/1432 ( 1.9%) | 140113, 140813, 160522, 161002, 161303, 170801, 180620, 200919, 210120, 230122, 230804, 230824, 240401, 241102, 241149, 241174, 241193, 243026, 243103, 243314, 243929, 244430, 244443, 244522, 244918, 245027, 245531 |
| Libido increased                      | 1st year         | 1/1432 ( <0.1%) | 160520                                                                                                                                                                                                                 |
|                                       | 2nd year         | 1/1166 ( <0.1%) | 245910                                                                                                                                                                                                                 |
|                                       | Overall          | 2/1432 ( 0.1%)  | 160520, 245910                                                                                                                                                                                                         |
| Loss of libido                        | 1st year         | 3/1432 ( 0.2%)  | 161110, 230413, 240217                                                                                                                                                                                                 |
|                                       | Overall          | 4/1432 ( 0.3%)  | 161110, 161111, 230413, 240217                                                                                                                                                                                         |

**Table 14.3.1 / 10: Number of subjects with adverse events including subject identifier and year by treatment (FAS)**

TREATMENT: LCS12

Primary system organ class

| Preferred term<br>MedDRA version 14.0 | YEAR OF<br>ONSET | N (%)           | subject identifier                                                                                                     |
|---------------------------------------|------------------|-----------------|------------------------------------------------------------------------------------------------------------------------|
| Mood altered                          | 1st year         | 10/1432 ( 0.7%) | 160301, 210503, 230613, 230903, 230917, 241014, 242326, 242701, 245024, 245026                                         |
|                                       | 2nd year         | 5/1166 ( 0.4%)  | 141409, 160960, 161532, 180409, 241414                                                                                 |
|                                       | Overall          | 15/1432 ( 1.0%) | 141409, 160301, 160960, 161532, 180409, 210503, 230613, 230903, 230917, 241014, 241414, 242326, 242701, 245024, 245026 |
| Mood swings                           | 1st year         | 9/1432 ( 0.6%)  | 200919, 240217, 241530, 241531, 243213, 243907, 244122, 244203, 246144                                                 |
|                                       | 2nd year         | 3/1166 ( 0.3%)  | 141412, 241133, 244402                                                                                                 |
|                                       | Overall          | 12/1432 ( 0.8%) | 141412, 200919, 240217, 241133, 241530, 241531, 243213, 243907, 244122, 244203, 244402, 246144                         |
| Nicotine dependence                   | 3rd year         | 1/ 963 ( 0.1%)  | 140605                                                                                                                 |
|                                       | Overall          | 1/1432 ( <0.1%) | 140605                                                                                                                 |
| Panic attack                          | 2nd year         | 1/1166 ( <0.1%) | 241531                                                                                                                 |
|                                       | Overall          | 1/1432 ( <0.1%) | 241531                                                                                                                 |
| Panic disorder                        | 2nd year         | 1/1166 ( <0.1%) | 160212                                                                                                                 |
|                                       | Overall          | 1/1432 ( <0.1%) | 160212                                                                                                                 |
| Personality disorder                  | 3rd year         | 1/ 963 ( 0.1%)  | 140817                                                                                                                 |
|                                       | Overall          | 1/1432 ( <0.1%) | 140817                                                                                                                 |
| Post-traumatic stress disorder        | 2nd year         | 1/1166 ( <0.1%) | 200612                                                                                                                 |
|                                       | Overall          | 1/1432 ( <0.1%) | 200612                                                                                                                 |
| Sleep disorder                        | 1st year         | 3/1432 ( 0.2%)  | 160541, 161117, 230613                                                                                                 |
|                                       | 2nd year         | 2/1166 ( 0.2%)  | 160541, 160615                                                                                                         |
|                                       | 3rd year         | 1/ 963 ( 0.1%)  | 230603                                                                                                                 |
|                                       | Overall          | 5/1432 ( 0.3%)  | 160541, 160615, 161117, 230603, 230613                                                                                 |
| Stress                                | 1st year         | 2/1432 ( 0.1%)  | 200528, 240217                                                                                                         |
|                                       | 3rd year         | 1/ 963 ( 0.1%)  | 120315                                                                                                                 |
|                                       | Overall          | 3/1432 ( 0.2%)  | 120315, 200528, 240217                                                                                                 |
| Suicide attempt                       | 2nd year         | 1/1166 ( <0.1%) | 244422                                                                                                                 |
|                                       | Overall          | 1/1432 ( <0.1%) | 244422                                                                                                                 |

**Table 14.3.1 / 10: Number of subjects with adverse events including subject identifier and year by treatment (FAS)**

TREATMENT: LCS12

Primary system organ class

| Preferred term<br>MedDRA version 14.0 | YEAR OF<br>ONSET | N (%)           | subject identifier                                                                                                   |
|---------------------------------------|------------------|-----------------|----------------------------------------------------------------------------------------------------------------------|
| Renal and urinary disorders           | 1st year         | 25/1432 ( 1.7%) |                                                                                                                      |
|                                       | 2nd year         | 8/1166 ( 0.7%)  |                                                                                                                      |
|                                       | 3rd year         | 10/ 963 ( 1.0%) |                                                                                                                      |
|                                       | Overall          | 41/1432 ( 2.9%) |                                                                                                                      |
| Calculus bladder                      | 1st year         | 1/1432 ( <0.1%) | 120634                                                                                                               |
|                                       | Overall          | 1/1432 ( <0.1%) | 120634                                                                                                               |
| Cystitis haemorrhagic                 | 1st year         | 1/1432 ( <0.1%) | 140208                                                                                                               |
|                                       | Overall          | 1/1432 ( <0.1%) | 140208                                                                                                               |
| Dysuria                               | 1st year         | 9/1432 ( 0.6%)  | 140510, 161304, 200901, 210101, 210602, 241133,<br>243972, 244117, 245803                                            |
|                                       | 2nd year         | 3/1166 ( 0.3%)  | 150108, 150143, 150506                                                                                               |
|                                       | 3rd year         | 3/ 963 ( 0.3%)  | 150143, 150151, 200911                                                                                               |
|                                       | Overall          | 14/1432 ( 1.0%) | 140510, 150108, 150143, 150151, 150506, 161304,<br>200901, 200911, 210101, 210602, 241133, 243972,<br>244117, 245803 |
| Haematuria                            | 1st year         | 1/1432 ( <0.1%) | 240209                                                                                                               |
|                                       | 3rd year         | 1/ 963 ( 0.1%)  | 245702                                                                                                               |
|                                       | Overall          | 2/1432 ( 0.1%)  | 240209, 245702                                                                                                       |
| Micturition urgency                   | 1st year         | 1/1432 ( <0.1%) | 244701                                                                                                               |
|                                       | 2nd year         | 1/1166 ( <0.1%) | 244607                                                                                                               |
|                                       | 3rd year         | 1/ 963 ( 0.1%)  | 244607                                                                                                               |
|                                       | Overall          | 2/1432 ( 0.1%)  | 244607, 244701                                                                                                       |
| Nephrolithiasis                       | 1st year         | 4/1432 ( 0.3%)  | 240525, 240721, 243903, 244707                                                                                       |
|                                       | 2nd year         | 1/1166 ( <0.1%) | 180821                                                                                                               |
|                                       | 3rd year         | 3/ 963 ( 0.3%)  | 141104, 241725, 244523                                                                                               |
|                                       | Overall          | 8/1432 ( 0.6%)  | 141104, 180821, 240525, 240721, 241725, 243903,<br>244523, 244707                                                    |
| Pollakiuria                           | 1st year         | 3/1432 ( 0.2%)  | 200219, 244117, 244701                                                                                               |
|                                       | 3rd year         | 1/ 963 ( 0.1%)  | 161322                                                                                                               |
|                                       | Overall          | 4/1432 ( 0.3%)  | 161322, 200219, 244117, 244701                                                                                       |



**Table 14.3.1 / 10: Number of subjects with adverse events including subject identifier and year by treatment (FAS)**

TREATMENT: LCS12

Primary system organ class

| Preferred term<br>MedDRA version 14.0    | YEAR OF<br>ONSET | N (%)             | subject identifier     |
|------------------------------------------|------------------|-------------------|------------------------|
| Polyuria                                 | 2nd year         | 1/1166 ( <0.1%)   | 244918                 |
|                                          | Overall          | 1/1432 ( <0.1%)   | 244918                 |
| Renal pain                               | 1st year         | 1/1432 ( <0.1%)   | 242506                 |
|                                          | Overall          | 1/1432 ( <0.1%)   | 242506                 |
| Strangury                                | 1st year         | 1/1432 ( <0.1%)   | 230501                 |
|                                          | Overall          | 1/1432 ( <0.1%)   | 230501                 |
| Stress urinary incontinence              | 3rd year         | 1/ 963 ( 0.1%)    | 245503                 |
|                                          | Overall          | 1/1432 ( <0.1%)   | 245503                 |
| Urinary incontinence                     | 1st year         | 2/1432 ( 0.1%)    | 160402, 161539         |
|                                          | 2nd year         | 1/1166 ( <0.1%)   | 170414                 |
|                                          | Overall          | 3/1432 ( 0.2%)    | 160402, 161539, 170414 |
| Urinary tract disorder                   | 1st year         | 1/1432 ( <0.1%)   | 161318                 |
|                                          | Overall          | 1/1432 ( <0.1%)   | 161318                 |
| Urinary tract inflammation               | 1st year         | 1/1432 ( <0.1%)   | 160220                 |
|                                          | Overall          | 1/1432 ( <0.1%)   | 160220                 |
| Urinary tract pain                       | 1st year         | 1/1432 ( <0.1%)   | 150167                 |
|                                          | 2nd year         | 1/1166 ( <0.1%)   | 150123                 |
|                                          | Overall          | 2/1432 ( 0.1%)    | 150123, 150167         |
| Reproductive system and breast disorders | 1st year         | 478/1432 ( 33.4%) |                        |
|                                          | 2nd year         | 213/1166 ( 18.3%) |                        |
|                                          | 3rd year         | 161/ 963 ( 16.7%) |                        |
|                                          | Overall          | 681/1432 ( 47.6%) |                        |
| Adenomyosis                              | 3rd year         | 1/ 963 ( 0.1%)    | 242806                 |
|                                          | Overall          | 1/1432 ( <0.1%)   | 242806                 |
| Adnexa uteri mass                        | 3rd year         | 1/ 963 ( 0.1%)    | 241305                 |
|                                          | Overall          | 1/1432 ( <0.1%)   | 241305                 |

**Table 14.3.1 / 10: Number of subjects with adverse events including subject identifier and year by treatment (FAS)**

TREATMENT: LCS12

Primary system organ class

| Preferred term<br>MedDRA version 14.0 | YEAR OF<br>ONSET | N (%)           | subject identifier                                     |
|---------------------------------------|------------------|-----------------|--------------------------------------------------------|
| Adnexa uteri pain                     | 1st year         | 2/1432 ( 0.1%)  | 243828, 243929                                         |
|                                       | 3rd year         | 1/ 963 ( 0.1%)  | 140105                                                 |
|                                       | Overall          | 3/1432 ( 0.2%)  | 140105, 243828, 243929                                 |
| Atrophic vulvovaginitis               | 2nd year         | 1/1166 ( <0.1%) | 244918                                                 |
|                                       | Overall          | 1/1432 ( <0.1%) | 244918                                                 |
| Breast calcifications                 | 1st year         | 1/1432 ( <0.1%) | 241605                                                 |
|                                       | Overall          | 1/1432 ( <0.1%) | 241605                                                 |
| Breast cyst                           | 1st year         | 2/1432 ( 0.1%)  | 150125, 170407                                         |
|                                       | 2nd year         | 1/1166 ( <0.1%) | 141019                                                 |
|                                       | Overall          | 3/1432 ( 0.2%)  | 141019, 150125, 170407                                 |
| Breast discomfort                     | 1st year         | 4/1432 ( 0.3%)  | 161212, 180342, 180668, 230917                         |
|                                       | Overall          | 4/1432 ( 0.3%)  | 161212, 180342, 180668, 230917                         |
| Breast dysplasia                      | 3rd year         | 1/ 963 ( 0.1%)  | 120401                                                 |
|                                       | Overall          | 1/1432 ( <0.1%) | 120401                                                 |
| Breast engorgement                    | 2nd year         | 1/1166 ( <0.1%) | 190216                                                 |
|                                       | Overall          | 1/1432 ( <0.1%) | 190216                                                 |
| Breast mass                           | 1st year         | 3/1432 ( 0.2%)  | 141026, 241704, 243929                                 |
|                                       | 2nd year         | 1/1166 ( <0.1%) | 200914                                                 |
|                                       | 3rd year         | 3/ 963 ( 0.3%)  | 242320, 243914, 244919                                 |
|                                       | Overall          | 7/1432 ( 0.5%)  | 141026, 200914, 241704, 242320, 243914, 243929, 244919 |

**Table 14.3.1 / 10: Number of subjects with adverse events including subject identifier and year by treatment (FAS)**

| TREATMENT: LCS12           |               |                 |                                                                                                                                                                                                                                                                                                |
|----------------------------|---------------|-----------------|------------------------------------------------------------------------------------------------------------------------------------------------------------------------------------------------------------------------------------------------------------------------------------------------|
| Primary system organ class |               |                 |                                                                                                                                                                                                                                                                                                |
| Preferred term             | YEAR OF ONSET | N (%)           | subject identifier                                                                                                                                                                                                                                                                             |
| MedDRA version 14.0        |               |                 |                                                                                                                                                                                                                                                                                                |
| Breast pain                | 1st year      | 23/1432 ( 1.6%) | 120320, 120403, 120613, 140105, 140117, 141027, 150104, 150125, 150142, 160803, 160951, 161102, 170402, 170407, 170605, 180136, 190128, 200708, 200802, 210127, 230908, 241416, 244412                                                                                                         |
|                            | 2nd year      | 9/1166 ( 0.8%)  | 120322, 120323, 140519, 150166, 150214, 180409, 200908, 230613, 240622                                                                                                                                                                                                                         |
|                            | 3rd year      | 6/ 963 ( 0.6%)  | 160571, 160717, 180122, 190132, 200708, 230613                                                                                                                                                                                                                                                 |
|                            | Overall       | 36/1432 ( 2.5%) | 120320, 120322, 120323, 120403, 120613, 140105, 140117, 140519, 141027, 150104, 150125, 150142, 150166, 150214, 160571, 160717, 160803, 160951, 161102, 170402, 170407, 170605, 180122, 180136, 180409, 190128, 190132, 200708, 200802, 200908, 210127, 230613, 230908, 240622, 241416, 244412 |
|                            |               |                 |                                                                                                                                                                                                                                                                                                |
| Breast swelling            | 1st year      | 1/1432 (<0.1%)  | 161102                                                                                                                                                                                                                                                                                         |
|                            | Overall       | 1/1432 (<0.1%)  | 161102                                                                                                                                                                                                                                                                                         |
| Breast tenderness          | 1st year      | 20/1432 ( 1.4%) | 120411, 120630, 120632, 141201, 141412, 160113, 160624, 160631, 161406, 210415, 230603, 231112, 241307, 241504, 242917, 243022, 243907, 244618, 245702, 246116                                                                                                                                 |
|                            | 2nd year      | 11/1166 ( 0.9%) | 120613, 141409, 160405, 160439, 160963, 231018, 241019, 242218, 242307, 245710, 245910                                                                                                                                                                                                         |
|                            | 3rd year      | 2/ 963 ( 0.2%)  | 140202, 160631                                                                                                                                                                                                                                                                                 |
|                            | Overall       | 32/1432 ( 2.2%) | 120411, 120613, 120630, 120632, 140202, 141201, 141409, 141412, 160113, 160405, 160439, 160624, 160631, 160963, 161406, 210415, 230603, 231018, 231112, 241019, 241307, 241504, 242218, 242307, 242917, 243022, 243907, 244618, 245702, 245710, 245910, 246116                                 |
| Cervical discharge         | 1st year      | 1/1432 (<0.1%)  | 243322                                                                                                                                                                                                                                                                                         |
|                            | 2nd year      | 1/1166 (<0.1%)  | 241127                                                                                                                                                                                                                                                                                         |
|                            | Overall       | 2/1432 ( 0.1%)  | 241127, 243322                                                                                                                                                                                                                                                                                 |

**Table 14.3.1 / 10: Number of subjects with adverse events including subject identifier and year by treatment (FAS)**

| TREATMENT: LCS12           |               |                  |                                                                                                                                                                                                                                                                                                                                                                                                                                                                                                                                                                                                                                                                                                                                                                                                                                 |
|----------------------------|---------------|------------------|---------------------------------------------------------------------------------------------------------------------------------------------------------------------------------------------------------------------------------------------------------------------------------------------------------------------------------------------------------------------------------------------------------------------------------------------------------------------------------------------------------------------------------------------------------------------------------------------------------------------------------------------------------------------------------------------------------------------------------------------------------------------------------------------------------------------------------|
| Primary system organ class |               |                  |                                                                                                                                                                                                                                                                                                                                                                                                                                                                                                                                                                                                                                                                                                                                                                                                                                 |
| Preferred term             | YEAR OF ONSET |                  | subject identifier                                                                                                                                                                                                                                                                                                                                                                                                                                                                                                                                                                                                                                                                                                                                                                                                              |
| MedDRA version 14.0        |               | N (%)            |                                                                                                                                                                                                                                                                                                                                                                                                                                                                                                                                                                                                                                                                                                                                                                                                                                 |
| Cervical dysplasia         | 1st year      | 17/1432 ( 1.2%)  | 140609, 141101, 160536, 160539, 161514, 180412, 180426, 200111, 230120, 230511, 240612, 240623, 240638, 241704, 242807, 243816, 243820                                                                                                                                                                                                                                                                                                                                                                                                                                                                                                                                                                                                                                                                                          |
|                            | 2nd year      | 46/1166 ( 3.9%)  | 120608, 140204, 140519, 150506, 160103, 160118, 160129, 160201, 160806, 160911, 160913, 160985, 161210, 170304, 170306, 180125, 180345, 180520, 180524, 190225, 200304, 210124, 210136, 210205, 230816, 230824, 231018, 240310, 240643, 240712, 241005, 241201, 241204, 241414, 241541, 242313, 242316, 243012, 243206, 243220, 243311, 244422, 244504, 244710, 245423, 245525                                                                                                                                                                                                                                                                                                                                                                                                                                                  |
|                            | 3rd year      | 50/ 963 ( 5.2%)  | 120310, 140301, 141423, 150142, 150506, 160437, 160624, 160711, 160982, 160985, 161406, 161414, 170608, 180136, 180325, 180425, 180514, 180520, 180603, 180707, 180728, 190203, 190409, 200626, 210124, 210125, 210136, 210203, 210411, 230406, 230413, 230607, 230913, 240215, 240357, 240736, 241028, 241536, 241704, 242212, 242302, 242818, 243012, 243609, 243913, 244425, 245014, 245432, 245904, 246214                                                                                                                                                                                                                                                                                                                                                                                                                  |
|                            | Overall       | 107/1432 ( 7.5%) | 120310, 120608, 140204, 140301, 140519, 140609, 141101, 141423, 150142, 150506, 160103, 160118, 160129, 160201, 160437, 160536, 160539, 160624, 160711, 160806, 160911, 160913, 160982, 160985, 161210, 161406, 161414, 161514, 170304, 170306, 170608, 180125, 180136, 180325, 180345, 180412, 180425, 180426, 180514, 180520, 180524, 180603, 180707, 180728, 190203, 190225, 190409, 200111, 200304, 200626, 210124, 210125, 210136, 210203, 210205, 210411, 230120, 230406, 230413, 230511, 230607, 230816, 230824, 230913, 231018, 240215, 240310, 240357, 240612, 240623, 240638, 240643, 240712, 240736, 240813, 241005, 241028, 241201, 241204, 241414, 241536, 241541, 241704, 242212, 242302, 242313, 242316, 242807, 242818, 243012, 243206, 243220, 243311, 243609, 243816, 243820, 243913, 244422, 244425, 244504, |

**Table 14.3.1 / 10: Number of subjects with adverse events including subject identifier and year by treatment (FAS)**

TREATMENT: LCS12

Primary system organ class

| Preferred term<br>MedDRA version 14.0 | YEAR OF<br>ONSET                            | N (%)                                                                 | subject identifier                                                                                                                                                                                                                            |
|---------------------------------------|---------------------------------------------|-----------------------------------------------------------------------|-----------------------------------------------------------------------------------------------------------------------------------------------------------------------------------------------------------------------------------------------|
|                                       |                                             |                                                                       | 244710, 245014, 245423, 245432, 245525, 245904,<br>246214                                                                                                                                                                                     |
| Cervical polyp                        | 1st year<br>Overall                         | 1/1432 ( <0.1%)<br>1/1432 ( <0.1%)                                    | 240520<br>240520                                                                                                                                                                                                                              |
| Cervix inflammation                   | 2nd year<br>Overall                         | 1/1166 ( <0.1%)<br>1/1432 ( <0.1%)                                    | 170608<br>170608                                                                                                                                                                                                                              |
| Coital bleeding                       | 1st year<br>2nd year<br>3rd year<br>Overall | 8/1432 ( 0.6%)<br>3/1166 ( 0.3%)<br>3/ 963 ( 0.3%)<br>14/1432 ( 1.0%) | 200504, 240825, 240904, 243830, 243939, 244119,<br>245503, 245508<br>150110, 190613, 245910<br>120623, 161511, 240701<br>120623, 150110, 161511, 190613, 200504, 240701,<br>240825, 240904, 243830, 243939, 244119, 245503,<br>245508, 245910 |
| Dysfunctional uterine bleeding        | 1st year<br>Overall                         | 3/1432 ( 0.2%)<br>3/1432 ( 0.2%)                                      | 243311, 243314, 243327<br>243311, 243314, 243327                                                                                                                                                                                              |

**Table 14.3.1 / 10: Number of subjects with adverse events including subject identifier and year by treatment (FAS)**

TREATMENT: LCS12

Primary system organ class

| Preferred term      | YEAR OF ONSET | N (%)            | subject identifier                                                                                                                                                                                                                                                                                                                                                                                                                                                                                                                                                                                                                                                                                                                                                                                                                                             |
|---------------------|---------------|------------------|----------------------------------------------------------------------------------------------------------------------------------------------------------------------------------------------------------------------------------------------------------------------------------------------------------------------------------------------------------------------------------------------------------------------------------------------------------------------------------------------------------------------------------------------------------------------------------------------------------------------------------------------------------------------------------------------------------------------------------------------------------------------------------------------------------------------------------------------------------------|
| MedDRA version 14.0 |               |                  |                                                                                                                                                                                                                                                                                                                                                                                                                                                                                                                                                                                                                                                                                                                                                                                                                                                                |
| Dysmenorrhoea       | 1st year      | 104/1432 ( 7.3%) | 120310, 120326, 120329, 120613, 140529, 140609, 140904, 141032, 141201, 150104, 150106, 150119, 150136, 150142, 150151, 150153, 150163, 150167, 160106, 160209, 160309, 160328, 160625, 160626, 160631, 160633, 160704, 160712, 160713, 160720, 160721, 160725, 160757, 160801, 160803, 160971, 160988, 161001, 161002, 161003, 161012, 161018, 161027, 161111, 161112, 161114, 161212, 161305, 161411, 161424, 190118, 190119, 190225, 200104, 200119, 200234, 200527, 200611, 200615, 200629, 200634, 200911, 200923, 210120, 210130, 210404, 210412, 210415, 230310, 230406, 230408, 230603, 230613, 230712, 230719, 230802, 230804, 230805, 230817, 230819, 230824, 231018, 240309, 240366, 240904, 241033, 241307, 241708, 242504, 243021, 243925, 243958, 243972, 244112, 244119, 244122, 244125, 244132, 244414, 244508, 244509, 244511, 245809, 245934 |
|                     | 2nd year      | 20/1166 ( 1.7%)  | 120307, 120310, 120320, 150110, 160328, 161026, 161106, 161424, 190216, 190225, 200304, 240135, 241156, 241302, 241525, 241551, 242302, 242907, 245514, 245518                                                                                                                                                                                                                                                                                                                                                                                                                                                                                                                                                                                                                                                                                                 |
|                     | 3rd year      | 13/ 963 ( 1.3%)  | 120320, 160525, 160639, 160918, 161109, 161301, 190132, 190133, 190225, 200109, 230603, 243820, 244407                                                                                                                                                                                                                                                                                                                                                                                                                                                                                                                                                                                                                                                                                                                                                         |
|                     | Overall       | 130/1432 ( 9.1%) | 120307, 120310, 120320, 120326, 120329, 120613, 140529, 140609, 140904, 141032, 141201, 150104, 150106, 150110, 150119, 150136, 150142, 150151, 150153, 150163, 150167, 160106, 160209, 160309, 160328, 160525, 160625, 160626, 160631, 160633, 160639, 160704, 160712, 160713, 160720, 160721, 160725, 160757, 160801, 160803, 160918, 160971, 160988, 161001, 161002, 161003, 161012, 161018, 161026, 161027, 161106, 161109, 161111, 161112, 161114, 161212, 161301, 161305, 161411, 161424, 190118, 190119, 190132, 190133, 190216, 190225, 200104, 200109, 200119, 200234, 200304, 200527, 200611, 200615, 200629,                                                                                                                                                                                                                                        |

**Table 14.3.1 / 10: Number of subjects with adverse events including subject identifier and year by treatment (FAS)**

TREATMENT: LCS12

Primary system organ class

| Preferred term<br>MedDRA version 14.0 | YEAR OF<br>ONSET | N (%)           | subject identifier                                                                                                                                                                                                                                                                                                                                                                                                                                     |
|---------------------------------------|------------------|-----------------|--------------------------------------------------------------------------------------------------------------------------------------------------------------------------------------------------------------------------------------------------------------------------------------------------------------------------------------------------------------------------------------------------------------------------------------------------------|
|                                       |                  |                 | 200634, 200911, 200923, 210120, 210130, 210404, 210412, 210415, 230310, 230406, 230408, 230603, 230613, 230712, 230719, 230802, 230804, 230805, 230817, 230819, 230824, 231018, 240135, 240309, 240366, 240904, 241033, 241156, 241302, 241307, 241525, 241551, 241708, 242302, 242504, 242907, 243021, 243820, 243925, 243958, 243972, 244112, 244119, 244122, 244125, 244132, 244407, 244414, 244508, 244509, 244511, 245514, 245518, 245809, 245934 |
| Dyspareunia                           | 1st year         | 24/1432 ( 1.7%) | 140502, 140515, 140529, 141423, 160207, 160803, 210101, 210111, 231016, 240209, 241133, 241532, 242917, 243009, 243012, 243220, 243224, 243939, 243948, 243979, 244450, 244917, 244919, 245809                                                                                                                                                                                                                                                         |
|                                       | 2nd year         | 7/1166 ( 0.6%)  | 140817, 150125, 231103, 240520, 241547, 241725, 243220                                                                                                                                                                                                                                                                                                                                                                                                 |
|                                       | 3rd year         | 3/ 963 ( 0.3%)  | 190132, 245421, 245519                                                                                                                                                                                                                                                                                                                                                                                                                                 |
|                                       | Overall          | 33/1432 ( 2.3%) | 140502, 140515, 140529, 140817, 141423, 150125, 160207, 160803, 190132, 210101, 210111, 231016, 231103, 240209, 240520, 241133, 241532, 241547, 241725, 242917, 243009, 243012, 243220, 243224, 243939, 243948, 243979, 244450, 244917, 244919, 245421, 245519, 245809                                                                                                                                                                                 |
| Ectropion of cervix                   | 1st year         | 2/1432 ( 0.1%)  | 190411, 200517                                                                                                                                                                                                                                                                                                                                                                                                                                         |
|                                       | Overall          | 2/1432 ( 0.1%)  | 190411, 200517                                                                                                                                                                                                                                                                                                                                                                                                                                         |
| Endometriosis                         | 1st year         | 4/1432 ( 0.3%)  | 200705, 240841, 244701, 245025                                                                                                                                                                                                                                                                                                                                                                                                                         |
|                                       | 2nd year         | 3/1166 ( 0.3%)  | 160973, 200708, 240110                                                                                                                                                                                                                                                                                                                                                                                                                                 |
|                                       | 3rd year         | 1/ 963 ( 0.1%)  | 161114                                                                                                                                                                                                                                                                                                                                                                                                                                                 |
|                                       | Overall          | 8/1432 ( 0.6%)  | 160973, 161114, 200705, 200708, 240110, 240841, 244701, 245025                                                                                                                                                                                                                                                                                                                                                                                         |
| Fibrocystic breast disease            | 1st year         | 1/1432 ( <0.1%) | 241536                                                                                                                                                                                                                                                                                                                                                                                                                                                 |
|                                       | 2nd year         | 2/1166 ( 0.2%)  | 140807, 244918                                                                                                                                                                                                                                                                                                                                                                                                                                         |
|                                       | 3rd year         | 1/ 963 ( 0.1%)  | 244918                                                                                                                                                                                                                                                                                                                                                                                                                                                 |
|                                       | Overall          | 3/1432 ( 0.2%)  | 140807, 241536, 244918                                                                                                                                                                                                                                                                                                                                                                                                                                 |

**Table 14.3.1 / 10: Number of subjects with adverse events including subject identifier and year by treatment (FAS)**

TREATMENT: LCS12

Primary system organ class

| Preferred term<br>MedDRA version 14.0 | YEAR OF<br>ONSET | N (%)           | subject identifier                                                                                     |
|---------------------------------------|------------------|-----------------|--------------------------------------------------------------------------------------------------------|
| Galactorrhoea                         | 1st year         | 3/1432 ( 0.2%)  | 230221, 240115, 243514                                                                                 |
|                                       | 2nd year         | 1/1166 ( <0.1%) | 245808                                                                                                 |
|                                       | Overall          | 4/1432 ( 0.3%)  | 230221, 240115, 243514, 245808                                                                         |
| Genital discharge                     | 1st year         | 4/1432 ( 0.3%)  | 140811, 150156, 170702, 190409                                                                         |
|                                       | 2nd year         | 5/1166 ( 0.4%)  | 141402, 150123, 150168, 160631, 245516                                                                 |
|                                       | 3rd year         | 1/ 963 ( 0.1%)  | 190409                                                                                                 |
|                                       | Overall          | 9/1432 ( 0.6%)  | 140811, 141402, 150123, 150156, 150168, 160631, 170702, 190409, 245516                                 |
| Genital haemorrhage                   | 1st year         | 1/1432 ( <0.1%) | 241005                                                                                                 |
|                                       | Overall          | 1/1432 ( <0.1%) | 241005                                                                                                 |
| Genital lesion                        | 1st year         | 2/1432 ( 0.1%)  | 244105, 244302                                                                                         |
|                                       | Overall          | 2/1432 ( 0.1%)  | 244105, 244302                                                                                         |
| Haemorrhagic ovarian cyst             | 1st year         | 11/1432 ( 0.8%) | 120104, 161027, 210411, 240508, 241023, 241231, 243307, 243502, 243948, 244430, 245516                 |
|                                       | 2nd year         | 2/1166 ( 0.2%)  | 160803, 161027                                                                                         |
|                                       | 3rd year         | 2/ 963 ( 0.2%)  | 140608, 243307                                                                                         |
|                                       | Overall          | 13/1432 ( 0.9%) | 120104, 140608, 160803, 161027, 210411, 240508, 241023, 241231, 243307, 243502, 243948, 244430, 245516 |
| Hydrometra                            | 1st year         | 1/1432 ( <0.1%) | 200505                                                                                                 |
|                                       | 2nd year         | 1/1166 ( <0.1%) | 230714                                                                                                 |
|                                       | Overall          | 2/1432 ( 0.1%)  | 200505, 230714                                                                                         |
| Hypomenorrhoea                        | 2nd year         | 1/1166 ( <0.1%) | 190203                                                                                                 |
|                                       | 3rd year         | 1/ 963 ( 0.1%)  | 190204                                                                                                 |
|                                       | Overall          | 2/1432 ( 0.1%)  | 190203, 190204                                                                                         |
| Menometrorrhagia                      | 1st year         | 1/1432 ( <0.1%) | 200213                                                                                                 |
|                                       | 2nd year         | 1/1166 ( <0.1%) | 200908                                                                                                 |
|                                       | Overall          | 2/1432 ( 0.1%)  | 200213, 200908                                                                                         |
| Menorrhagia                           | 1st year         | 5/1432 ( 0.3%)  | 141008, 200307, 240904, 243979, 245809                                                                 |
|                                       | 3rd year         | 1/ 963 ( 0.1%)  | 200216                                                                                                 |
|                                       | Overall          | 6/1432 ( 0.4%)  | 141008, 200216, 200307, 240904, 243979, 245809                                                         |



**Table 14.3.1 / 10: Number of subjects with adverse events including subject identifier and year by treatment (FAS)**

TREATMENT: LCS12

Primary system organ class

| Preferred term<br>MedDRA version 14.0 | YEAR OF<br>ONSET | N (%)           | subject identifier                                                                                                                   |
|---------------------------------------|------------------|-----------------|--------------------------------------------------------------------------------------------------------------------------------------|
| Menstrual disorder                    | 1st year         | 2/1432 ( 0.1%)  | 140905, 180666                                                                                                                       |
|                                       | 2nd year         | 1/1166 ( <0.1%) | 180652                                                                                                                               |
|                                       | Overall          | 3/1432 ( 0.2%)  | 140905, 180652, 180666                                                                                                               |
|                                       |                  |                 |                                                                                                                                      |
| Menstruation irregular                | 1st year         | 1/1432 ( <0.1%) | 242103                                                                                                                               |
|                                       | 2nd year         | 1/1166 ( <0.1%) | 230613                                                                                                                               |
|                                       | 3rd year         | 2/ 963 ( 0.2%)  | 180740, 244523                                                                                                                       |
|                                       | Overall          | 4/1432 ( 0.3%)  | 180740, 230613, 242103, 244523                                                                                                       |
| Metrorrhagia                          | 1st year         | 11/1432 ( 0.8%) | 120111, 140609, 150207, 160207, 160209, 180722,<br>230219, 230411, 242307, 242709, 243004                                            |
|                                       | 2nd year         | 1/1166 ( <0.1%) | 200908                                                                                                                               |
|                                       | 3rd year         | 4/ 963 ( 0.4%)  | 170404, 190104, 190203, 200207                                                                                                       |
|                                       | Overall          | 16/1432 ( 1.1%) | 120111, 140609, 150207, 160207, 160209, 170404,<br>180722, 190104, 190203, 200207, 200908, 230219,<br>230411, 242307, 242709, 243004 |
| Nipple pain                           | 1st year         | 2/1432 ( 0.1%)  | 240814, 241416                                                                                                                       |
|                                       | 3rd year         | 1/ 963 ( 0.1%)  | 245702                                                                                                                               |
|                                       | Overall          | 3/1432 ( 0.2%)  | 240814, 241416, 245702                                                                                                               |

**Table 14.3.1 / 10: Number of subjects with adverse events including subject identifier and year by treatment (FAS)**

TREATMENT: LCS12

Primary system organ class

Preferred term

MedDRA version 14.0

Ovarian cyst

YEAR OF

ONSET

N (%)

subject identifier

1st year 115/1432 ( 8.0%)

2nd year 57/1166 ( 4.9%)

3rd year 40/ 963 ( 4.2%)

120127, 120218, 120240, 120242, 120305, 120320,  
120418, 120613, 120621, 140105, 140301, 140807,  
140808, 140904, 140911, 141028, 150143, 150503,  
160207, 160208, 160213, 160321, 160538, 160547,  
160551,  
160557, 160567, 160569, 160732, 160803, 160806,  
160951, 161224, 170901, 180116, 180615, 180662,  
180681, 190110, 190126, 190133, 190218, 200111,  
200201, 200219, 200412, 200625, 200629, 200705,  
200709,  
200911, 200923, 210101, 210116, 230117, 230303,  
230904, 231102, 240309, 240337, 240357, 240366,  
240370, 240521, 240606, 240625, 240630, 240639,  
240824, 240827, 241004, 241015, 241023, 241033,  
241105,  
241123, 241156, 241167, 241190, 241410, 241424,  
241521, 241545, 241548, 241553, 241704, 242326,  
242903, 243103, 243121, 243231, 243609, 243816,  
243939, 243948, 244003, 244004, 244422, 244427,  
244428,  
244430, 244442, 244509, 245004, 245008, 245433,  
245439, 245702, 245709, 245807, 245923, 245934,  
246122, 246210, 246216  
120403, 120412, 120611, 140301, 140706, 140811,  
150136, 160208, 160220, 160323, 160331, 160416,  
160437, 160564, 160758, 160951, 161122, 161212,  
161411, 180603, 180681, 190204, 190610, 200109,  
200219,  
200506, 200927, 210205, 210602, 230401, 230613,  
231102, 240311, 240525, 240712, 240715, 241108,  
241142, 241190, 241513, 241525, 241531, 241545,  
241712, 242315, 243103, 243302, 243830, 244407,  
244414,  
244430, 244602, 244613, 244711, 245709, 245911,  
245916  
120204, 120312, 120330, 120621, 140206, 140219,  
140811, 160551, 160722, 160739, 160753, 180614,  
180734, 190204, 200625, 231012, 231014, 240623,  
240715, 240827, 241015, 241159, 241185, 241227,  
241414,  
241521, 241531, 241805, 242315, 242504, 242714,  
242902, 243510, 244407, 244430, 245401, 245433,  
245528, 245702, 246119

**Table 14.3.1 / 10: Number of subjects with adverse events including subject identifier and year by treatment (FAS)**

TREATMENT: LCS12

Primary system organ class

Preferred term

MedDRA version 14.0

YEAR OF

ONSET

N (%)

subject identifier

Overall 186/1432 ( 13.0%)

 120127, 120204, 120218, 120240, 120242, 120305,  
 120312, 120320, 120330, 120403, 120412, 120418,  
 120611, 120613, 120621, 140105, 140206, 140219,  
 140301, 140706, 140807, 140808, 140811, 140904,  
 140911,  
 141028, 150136, 150143, 150503, 160207, 160208,  
 160213, 160220, 160321, 160323, 160331, 160416,  
 160437, 160538, 160547, 160551, 160557, 160564,  
 160567, 160569, 160722, 160732, 160739, 160753,  
 160758,  
 160803, 160806, 160951, 161122, 161212, 161224,  
 161411, 170901, 180116, 180603, 180614, 180615,  
 180662, 180681, 180734, 190110, 190126, 190133,  
 190204, 190218, 190610, 200109, 200111, 200201,  
 200219,  
 200412, 200506, 200625, 200629, 200705, 200709,  
 200911, 200923, 200927, 210101, 210116, 210205,  
 210602, 230117, 230303, 230401, 230613, 230904,  
 231012, 231014, 231102, 240309, 240311, 240337,  
 240357,  
 240366, 240370, 240521, 240525, 240606, 240623,  
 240625, 240630, 240639, 240712, 240715, 240824,  
 240827, 241004, 241015, 241023, 241033, 241105,  
 241108, 241123, 241142, 241156, 241159, 241167,  
 241185,  
 241190, 241227, 241410, 241414, 241424, 241513,  
 241521, 241525, 241531, 241545, 241548, 241553,  
 241704, 241712, 241805, 242315, 242326, 242504,  
 242714, 242902, 242903, 243103, 243121, 243231,  
 243302,  
 243510, 243609, 243816, 243830, 243939, 243948,  
 244003, 244004, 244407, 244414, 244422, 244427,  
 244428, 244430, 244442, 244509, 244602, 244613,  
 244711, 245004, 245008, 245401, 245433, 245439,  
 245528,  
 245702, 245709, 245807, 245911, 245916, 245923,  
 245934, 246119, 246122, 246210, 246216

Ovarian cyst ruptured

1st year

2/1432 ( 0.1%)

161416, 245923

Overall

2/1432 ( 0.1%)

161416, 245923

**Table 14.3.1 / 10: Number of subjects with adverse events including subject identifier and year by treatment (FAS)**

TREATMENT: LCS12

Primary system organ class

| Preferred term<br>MedDRA version 14.0 | YEAR OF<br>ONSET | N (%)           | subject identifier                             |
|---------------------------------------|------------------|-----------------|------------------------------------------------|
| Ovarian enlargement                   | 1st year         | 1/1432 ( <0.1%) | 141034                                         |
|                                       | Overall          | 1/1432 ( <0.1%) | 141034                                         |
| Ovarian mass                          | 2nd year         | 1/1166 ( <0.1%) | 243121                                         |
|                                       | Overall          | 1/1432 ( <0.1%) | 243121                                         |
| Ovulation pain                        | 1st year         | 4/1432 ( 0.3%)  | 160129, 160213, 242504, 244117                 |
|                                       | 2nd year         | 1/1166 ( <0.1%) | 161017                                         |
|                                       | 3rd year         | 1/ 963 ( 0.1%)  | 243941                                         |
|                                       | Overall          | 6/1432 ( 0.4%)  | 160129, 160213, 161017, 242504, 243941, 244117 |
| Parovarian cyst                       | 1st year         | 2/1432 ( 0.1%)  | 161122, 210136                                 |
|                                       | 3rd year         | 1/ 963 ( 0.1%)  | 161114                                         |
|                                       | Overall          | 3/1432 ( 0.2%)  | 161114, 161122, 210136                         |
| Pelvic congestion                     | 1st year         | 1/1432 ( <0.1%) | 190409                                         |
|                                       | Overall          | 1/1432 ( <0.1%) | 190409                                         |
| Pelvic discomfort                     | 1st year         | 4/1432 ( 0.3%)  | 241120, 241133, 243009, 246217                 |
|                                       | 2nd year         | 1/1166 ( <0.1%) | 140302                                         |
|                                       | 3rd year         | 1/ 963 ( 0.1%)  | 243231                                         |
|                                       | Overall          | 6/1432 ( 0.4%)  | 140302, 241120, 241133, 243009, 243231, 246217 |
| Pelvic fluid collection               | 3rd year         | 1/ 963 ( 0.1%)  | 242902                                         |
|                                       | Overall          | 1/1432 ( <0.1%) | 242902                                         |

**Table 14.3.1 / 10: Number of subjects with adverse events including subject identifier and year by treatment (FAS)**

TREATMENT: LCS12

Primary system organ class

Preferred term

MedDRA version 14.0

|             | YEAR OF ONSET | N (%)           | subject identifier                                                                                                                                                                                                                                                                                                                                                                                                                                                                                                                                                                                                                                                                                                                                                                             |
|-------------|---------------|-----------------|------------------------------------------------------------------------------------------------------------------------------------------------------------------------------------------------------------------------------------------------------------------------------------------------------------------------------------------------------------------------------------------------------------------------------------------------------------------------------------------------------------------------------------------------------------------------------------------------------------------------------------------------------------------------------------------------------------------------------------------------------------------------------------------------|
| Pelvic pain | 1st year      | 71/1432 ( 5.0%) | 120111, 120205, 120304, 120310, 120611, 120613, 120630, 120632, 140202, 140204, 140218, 140301, 140304, 150109, 150123, 150149, 150155, 150156, 150158, 150219, 160711, 160742, 161121, 161127, 161219, 161304, 170304, 170901, 200501, 200927, 210603, 230112, 230117, 230120, 230310, 230405, 230712, 230809, 230904, 240818, 240825, 241154, 241167, 241532, 241536, 241544, 241545, 241734, 242103, 242209, 242302, 242902, 242907, 242917, 243026, 243207, 243220, 243224, 243231, 243702, 243925, 243929, 244931, 245025, 245601, 245807, 246104, 246112, 246116, 246122, 246216                                                                                                                                                                                                         |
|             | 2nd year      | 21/1166 ( 1.8%) | 120320, 140301, 150110, 150136, 150153, 150214, 161219, 190601, 200908, 200911, 230112, 230602, 230613, 230818, 240209, 240326, 242218, 243220, 243222, 243511, 244402                                                                                                                                                                                                                                                                                                                                                                                                                                                                                                                                                                                                                         |
|             | 3rd year      | 10/ 963 ( 1.0%) | 120108, 120310, 150142, 160710, 161121, 180116, 200304, 200528, 230125, 240828                                                                                                                                                                                                                                                                                                                                                                                                                                                                                                                                                                                                                                                                                                                 |
|             | Overall       | 96/1432 ( 6.7%) | 120108, 120111, 120205, 120304, 120310, 120320, 120611, 120613, 120630, 120632, 140202, 140204, 140218, 140301, 140304, 150109, 150110, 150123, 150136, 150142, 150149, 150153, 150155, 150156, 150158, 150214, 150219, 160710, 160711, 160742, 161121, 161127, 161219, 161304, 170304, 170901, 180116, 190601, 200304, 200501, 200528, 200908, 200911, 200927, 210603, 230112, 230117, 230120, 230125, 230310, 230405, 230602, 230613, 230712, 230809, 230818, 230904, 240209, 240326, 240818, 240825, 240828, 241154, 241167, 241532, 241536, 241544, 241545, 241734, 242103, 242209, 242218, 242302, 242902, 242907, 242917, 243026, 243207, 243220, 243222, 243224, 243231, 243511, 243702, 243925, 243929, 244402, 244931, 245025, 245601, 245807, 246104, 246112, 246116, 246122, 246216 |

**Table 14.3.1 / 10: Number of subjects with adverse events including subject identifier and year by treatment (FAS)**

TREATMENT: LCS12

| Primary system organ class<br>Preferred term<br>MedDRA version 14.0 | YEAR OF<br>ONSET | N (%)           | subject identifier                                                                                                                     |
|---------------------------------------------------------------------|------------------|-----------------|----------------------------------------------------------------------------------------------------------------------------------------|
| Pelvic prolapse                                                     | 1st year         | 1/1432 ( <0.1%) | 240841                                                                                                                                 |
|                                                                     | Overall          | 1/1432 ( <0.1%) | 240841                                                                                                                                 |
| Perineal pain                                                       | 2nd year         | 1/1166 ( <0.1%) | 245910                                                                                                                                 |
|                                                                     | Overall          | 1/1432 ( <0.1%) | 245910                                                                                                                                 |
| Polycystic ovaries                                                  | 1st year         | 2/1432 ( 0.1%)  | 180739, 244918                                                                                                                         |
|                                                                     | 3rd year         | 3/ 963 ( 0.3%)  | 140918, 190418, 244918                                                                                                                 |
|                                                                     | Overall          | 4/1432 ( 0.3%)  | 140918, 180739, 190418, 244918                                                                                                         |
| Polymenorrhoea                                                      | 2nd year         | 1/1166 ( <0.1%) | 190216                                                                                                                                 |
|                                                                     | Overall          | 1/1432 ( <0.1%) | 190216                                                                                                                                 |
| Premenstrual syndrome                                               | 1st year         | 9/1432 ( 0.6%)  | 141423, 160918, 161539, 200614, 210106, 230517, 240721, 241175, 244132                                                                 |
|                                                                     | 2nd year         | 6/1166 ( 0.5%)  | 200619, 230318, 231018, 241305, 244203, 245410                                                                                         |
|                                                                     | 3rd year         | 2/ 963 ( 0.2%)  | 160952, 242714                                                                                                                         |
|                                                                     | Overall          | 17/1432 ( 1.2%) | 141423, 160918, 160952, 161539, 200614, 200619, 210106, 230318, 230517, 231018, 240721, 241175, 241305, 242714, 244132, 244203, 245410 |
| Pruritus genital                                                    | 1st year         | 1/1432 ( <0.1%) | 240503                                                                                                                                 |
|                                                                     | Overall          | 1/1432 ( <0.1%) | 240503                                                                                                                                 |
| Uterine cervical erosion                                            | 1st year         | 1/1432 ( <0.1%) | 200503                                                                                                                                 |
|                                                                     | Overall          | 1/1432 ( <0.1%) | 200503                                                                                                                                 |
| Uterine cervical pain                                               | 1st year         | 2/1432 ( 0.1%)  | 140111, 244919                                                                                                                         |
|                                                                     | Overall          | 2/1432 ( 0.1%)  | 140111, 244919                                                                                                                         |
| Uterine haemorrhage                                                 | 1st year         | 6/1432 ( 0.4%)  | 120236, 210412, 240806, 241733, 244112, 244122                                                                                         |
|                                                                     | 2nd year         | 1/1166 ( <0.1%) | 161219                                                                                                                                 |
|                                                                     | 3rd year         | 1/ 963 ( 0.1%)  | 180210                                                                                                                                 |
|                                                                     | Overall          | 8/1432 ( 0.6%)  | 120236, 161219, 180210, 210412, 240806, 241733, 244112, 244122                                                                         |
| Uterine pain                                                        | 1st year         | 1/1432 ( <0.1%) | 170304                                                                                                                                 |
|                                                                     | 2nd year         | 1/1166 ( <0.1%) | 244914                                                                                                                                 |
|                                                                     | Overall          | 2/1432 ( 0.1%)  | 170304, 244914                                                                                                                         |

**Table 14.3.1 / 10: Number of subjects with adverse events including subject identifier and year by treatment (FAS)**

TREATMENT: LCS12

Primary system organ class

| Preferred term<br>MedDRA version 14.0 | YEAR OF<br>ONSET | N (%)           | subject identifier                                                                                                                                                                                                                                            |
|---------------------------------------|------------------|-----------------|---------------------------------------------------------------------------------------------------------------------------------------------------------------------------------------------------------------------------------------------------------------|
| Uterine polyp                         | 1st year         | 1/1432 ( <0.1%) | 200207                                                                                                                                                                                                                                                        |
|                                       | 2nd year         | 1/1166 ( <0.1%) | 245709                                                                                                                                                                                                                                                        |
|                                       | Overall          | 2/1432 ( 0.1%)  | 200207, 245709                                                                                                                                                                                                                                                |
| Uterine prolapse                      | 3rd year         | 1/ 963 ( 0.1%)  | 245503                                                                                                                                                                                                                                                        |
|                                       | Overall          | 1/1432 ( <0.1%) | 245503                                                                                                                                                                                                                                                        |
| Uterine spasm                         | 1st year         | 27/1432 ( 1.9%) | 140921, 141104, 161403, 161406, 161407, 161410,<br>161411, 161414, 161416, 161431, 161435, 161437,<br>161440, 200503, 210603, 210606, 230615, 241302,<br>241307, 241721, 242812, 242818, 244005, 244441,<br>244450,<br>244524, 245903                         |
|                                       | 2nd year         | 3/1166 ( 0.3%)  | 240223, 241725, 245807                                                                                                                                                                                                                                        |
|                                       | 3rd year         | 1/ 963 ( 0.1%)  | 245807                                                                                                                                                                                                                                                        |
|                                       | Overall          | 30/1432 ( 2.1%) | 140921, 141104, 161403, 161406, 161407, 161410,<br>161411, 161414, 161416, 161431, 161435, 161437,<br>161440, 200503, 210603, 210606, 230615, 240223,<br>241302, 241307, 241721, 241725, 242812, 242818,<br>244005,<br>244441, 244450, 244524, 245807, 245903 |
|                                       |                  |                 |                                                                                                                                                                                                                                                               |
| Uterine tenderness                    | 1st year         | 1/1432 ( <0.1%) | 241721                                                                                                                                                                                                                                                        |
|                                       | Overall          | 1/1432 ( <0.1%) | 241721                                                                                                                                                                                                                                                        |
| Vaginal cyst                          | 1st year         | 1/1432 ( <0.1%) | 241530                                                                                                                                                                                                                                                        |
|                                       | Overall          | 1/1432 ( <0.1%) | 241530                                                                                                                                                                                                                                                        |

**Table 14.3.1 / 10: Number of subjects with adverse events including subject identifier and year by treatment (FAS)**

TREATMENT: LCS12

Primary system organ class

| Preferred term<br>MedDRA version 14.0 | YEAR OF<br>ONSET | N (%)           | subject identifier                                                                                                                                                                                                                                                                                                                                                                                                                                     |
|---------------------------------------|------------------|-----------------|--------------------------------------------------------------------------------------------------------------------------------------------------------------------------------------------------------------------------------------------------------------------------------------------------------------------------------------------------------------------------------------------------------------------------------------------------------|
| Vaginal discharge                     | 1st year         | 36/1432 ( 2.5%) | 120304, 120307, 120401, 120610, 120613, 120632, 120633, 140113, 140701, 160928, 160973, 161110, 180102, 180644, 200115, 200631, 200709, 200912, 210201, 210602, 230112, 230818, 230901, 241127, 241172, 241553, 242212, 243117, 243907, 243929, 244125, 244203, 244711, 245518, 245809, 246216                                                                                                                                                         |
|                                       | 2nd year         | 20/1166 ( 1.7%) | 120418, 120611, 120623, 120630, 120632, 120633, 141402, 160914, 161117, 180109, 180136, 230509, 230613, 231112, 240135, 241129, 241421, 241553, 244109, 244914                                                                                                                                                                                                                                                                                         |
|                                       | 3rd year         | 6/ 963 ( 0.6%)  | 120113, 120307, 120610, 120623, 240612, 244711                                                                                                                                                                                                                                                                                                                                                                                                         |
|                                       | Overall          | 55/1432 ( 3.8%) | 120113, 120304, 120307, 120401, 120418, 120610, 120611, 120613, 120623, 120630, 120632, 120633, 140113, 140701, 141402, 160914, 160928, 160973, 161110, 161117, 180102, 180109, 180136, 180644, 200115, 200631, 200709, 200912, 210201, 210602, 230112, 230509, 230613, 230818, 230901, 231112, 240135, 240612, 241127, 241129, 241172, 241421, 241553, 242212, 243117, 243907, 243929, 244109, 244125, 244203, 244711, 244914, 245518, 245809, 246216 |
|                                       |                  |                 |                                                                                                                                                                                                                                                                                                                                                                                                                                                        |
| Vaginal disorder                      | 1st year         | 3/1432 ( 0.2%)  | 120409, 120411, 140802                                                                                                                                                                                                                                                                                                                                                                                                                                 |
|                                       | 3rd year         | 1/ 963 ( 0.1%)  | 190133                                                                                                                                                                                                                                                                                                                                                                                                                                                 |
|                                       | Overall          | 4/1432 ( 0.3%)  | 120409, 120411, 140802, 190133                                                                                                                                                                                                                                                                                                                                                                                                                         |



**Table 14.3.1 / 10: Number of subjects with adverse events including subject identifier and year by treatment (FAS)**

TREATMENT: LCS12

Primary system organ class

| Preferred term          | YEAR OF ONSET |                 | subject identifier                                                                                                                                                                                                                                                                                                                                                                                                                                                                                                                             |
|-------------------------|---------------|-----------------|------------------------------------------------------------------------------------------------------------------------------------------------------------------------------------------------------------------------------------------------------------------------------------------------------------------------------------------------------------------------------------------------------------------------------------------------------------------------------------------------------------------------------------------------|
| MedDRA version 14.0     | ONSET         | N (%)           |                                                                                                                                                                                                                                                                                                                                                                                                                                                                                                                                                |
| Vaginal haemorrhage     | 1st year      | 51/1432 ( 3.6%) | 140813, 150119, 150158, 150163, 160436, 160505, 160535, 160712, 160726, 160729, 160732, 161225, 170101, 170304, 170801, 170802, 180335, 180635, 180741, 200119, 200503, 200710, 200908, 200914, 210109, 210126, 210516, 230405, 230817, 230904, 231017, 231022, 240112, 240366, 240639, 241122, 241221, 241410, 241715, 241811, 242103, 242223, 242701, 243224, 243720, 243910, 243919, 244524, 245809, 245929, 246217                                                                                                                         |
|                         | 2nd year      | 13/1166 ( 1.1%) | 140111, 150125, 180722, 200230, 200629, 200709, 210602, 240135, 240520, 240740, 241172, 244710, 244931                                                                                                                                                                                                                                                                                                                                                                                                                                         |
|                         | 3rd year      | 3/ 963 ( 0.3%)  | 160712, 240357, 240715                                                                                                                                                                                                                                                                                                                                                                                                                                                                                                                         |
|                         | Overall       | 66/1432 ( 4.6%) | 140111, 140813, 150119, 150125, 150158, 150163, 160436, 160505, 160535, 160712, 160726, 160729, 160732, 161225, 170101, 170304, 170801, 170802, 180335, 180635, 180722, 180741, 200119, 200230, 200503, 200629, 200709, 200710, 200908, 200914, 210109, 210126, 210516, 210602, 230405, 230817, 230904, 231017, 231022, 240112, 240135, 240357, 240366, 240520, 240639, 240715, 240740, 241122, 241172, 241221, 241410, 241715, 241811, 242103, 242223, 242701, 243224, 243720, 243910, 243919, 244524, 244710, 244931, 245809, 245929, 246217 |
|                         |               |                 |                                                                                                                                                                                                                                                                                                                                                                                                                                                                                                                                                |
| Vaginal lesion          | 1st year      | 1/1432 (<0.1%)  | 244132                                                                                                                                                                                                                                                                                                                                                                                                                                                                                                                                         |
|                         | Overall       | 1/1432 (<0.1%)  | 244132                                                                                                                                                                                                                                                                                                                                                                                                                                                                                                                                         |
| Vaginal odour           | 1st year      | 1/1432 (<0.1%)  | 245518                                                                                                                                                                                                                                                                                                                                                                                                                                                                                                                                         |
|                         | 2nd year      | 1/1166 (<0.1%)  | 244105                                                                                                                                                                                                                                                                                                                                                                                                                                                                                                                                         |
|                         | 3rd year      | 4/ 963 ( 0.4%)  | 141412, 244711, 245701, 245710                                                                                                                                                                                                                                                                                                                                                                                                                                                                                                                 |
|                         | Overall       | 6/1432 ( 0.4%)  | 141412, 244105, 244711, 245518, 245701, 245710                                                                                                                                                                                                                                                                                                                                                                                                                                                                                                 |
| Vaginal wall congestion | 2nd year      | 1/1166 (<0.1%)  | 244918                                                                                                                                                                                                                                                                                                                                                                                                                                                                                                                                         |
|                         | Overall       | 1/1432 (<0.1%)  | 244918                                                                                                                                                                                                                                                                                                                                                                                                                                                                                                                                         |

**Table 14.3.1 / 10: Number of subjects with adverse events including subject identifier and year by treatment (FAS)**

| TREATMENT: LCS12                                |               |                 |                                                                                                                                |
|-------------------------------------------------|---------------|-----------------|--------------------------------------------------------------------------------------------------------------------------------|
| Primary system organ class                      | YEAR OF ONSET | N (%)           | subject identifier                                                                                                             |
| Preferred term                                  |               |                 |                                                                                                                                |
| MedDRA version 14.0                             |               |                 |                                                                                                                                |
| Vulval disorder                                 | 3rd year      | 1/ 963 ( 0.1%)  | 244105                                                                                                                         |
|                                                 | Overall       | 1/1432 ( <0.1%) | 244105                                                                                                                         |
| Vulvovaginal burning sensation                  | 1st year      | 1/1432 ( <0.1%) | 140515                                                                                                                         |
|                                                 | Overall       | 1/1432 ( <0.1%) | 140515                                                                                                                         |
| Vulvovaginal discomfort                         | 1st year      | 4/1432 ( 0.3%)  | 200916, 240623, 242103, 243003                                                                                                 |
|                                                 | 3rd year      | 2/ 963 ( 0.2%)  | 190203, 240622                                                                                                                 |
|                                                 | Overall       | 6/1432 ( 0.4%)  | 190203, 200916, 240622, 240623, 242103, 243003                                                                                 |
| Vulvovaginal dryness                            | 1st year      | 2/1432 ( 0.1%)  | 160976, 230310                                                                                                                 |
|                                                 | 2nd year      | 1/1166 ( <0.1%) | 241707                                                                                                                         |
|                                                 | Overall       | 3/1432 ( 0.2%)  | 160976, 230310, 241707                                                                                                         |
| Vulvovaginal pain                               | 1st year      | 2/1432 ( 0.1%)  | 160756, 243903                                                                                                                 |
|                                                 | 3rd year      | 1/ 963 ( 0.1%)  | 244408                                                                                                                         |
|                                                 | Overall       | 3/1432 ( 0.2%)  | 160756, 243903, 244408                                                                                                         |
| Vulvovaginal pruritus                           | 1st year      | 10/1432 ( 0.7%) | 120419, 140502, 140811, 160717, 190126, 190128, 200910, 242212, 242805, 243222                                                 |
|                                                 | 2nd year      | 4/1166 ( 0.3%)  | 160406, 230604, 240740, 245807                                                                                                 |
|                                                 | 3rd year      | 3/ 963 ( 0.3%)  | 160576, 160712, 230604                                                                                                         |
|                                                 | Overall       | 16/1432 ( 1.1%) | 120419, 140502, 140811, 160406, 160576, 160712, 160717, 190126, 190128, 200910, 230604, 240740, 242212, 242805, 243222, 245807 |
| Vulvovaginal swelling                           | 2nd year      | 1/1166 ( <0.1%) | 244934                                                                                                                         |
|                                                 | Overall       | 1/1432 ( <0.1%) | 244934                                                                                                                         |
| Respiratory, thoracic and mediastinal disorders | 1st year      | 36/1432 ( 2.5%) |                                                                                                                                |
|                                                 | 2nd year      | 31/1166 ( 2.7%) |                                                                                                                                |
|                                                 | 3rd year      | 14/ 963 ( 1.5%) |                                                                                                                                |
|                                                 | Overall       | 71/1432 ( 5.0%) |                                                                                                                                |
| Allergic sinusitis                              | 1st year      | 1/1432 ( <0.1%) | 243941                                                                                                                         |
|                                                 | Overall       | 1/1432 ( <0.1%) | 243941                                                                                                                         |

**Table 14.3.1 / 10: Number of subjects with adverse events including subject identifier and year by treatment (FAS)**

| TREATMENT: LCS12           |               |                 |                                                                                                        |
|----------------------------|---------------|-----------------|--------------------------------------------------------------------------------------------------------|
| Primary system organ class |               |                 |                                                                                                        |
| Preferred term             | YEAR OF ONSET | N (%)           | subject identifier                                                                                     |
| MedDRA version 14.0        |               |                 |                                                                                                        |
| Asthma                     | 1st year      | 4/1432 ( 0.3%)  | 160564, 161203, 200202, 230221                                                                         |
|                            | 2nd year      | 6/1166 ( 0.5%)  | 120205, 160909, 161203, 170606, 243609, 245502                                                         |
|                            | 3rd year      | 3/ 963 ( 0.3%)  | 160576, 160623, 161203                                                                                 |
|                            | Overall       | 11/1432 ( 0.8%) | 120205, 160564, 160576, 160623, 160909, 161203, 170606, 200202, 230221, 243609, 245502                 |
| Bronchospasm               | 1st year      | 2/1432 ( 0.1%)  | 120604, 120621                                                                                         |
|                            | Overall       | 2/1432 ( 0.1%)  | 120604, 120621                                                                                         |
| Cough                      | 1st year      | 3/1432 ( 0.2%)  | 140519, 200911, 242307                                                                                 |
|                            | 2nd year      | 5/1166 ( 0.4%)  | 160572, 161532, 200901, 230607, 244934                                                                 |
|                            | 3rd year      | 6/ 963 ( 0.6%)  | 160625, 161532, 242906, 244105, 244407, 245933                                                         |
|                            | Overall       | 13/1432 ( 0.9%) | 140519, 160572, 160625, 161532, 200901, 200911, 230607, 242307, 242906, 244105, 244407, 244934, 245933 |
| Dyspnoea                   | 2nd year      | 1/1166 ( <0.1%) | 160623                                                                                                 |
|                            | Overall       | 1/1432 ( <0.1%) | 160623                                                                                                 |
| Epiglottic cyst            | 1st year      | 1/1432 ( <0.1%) | 244707                                                                                                 |
|                            | Overall       | 1/1432 ( <0.1%) | 244707                                                                                                 |
| Epistaxis                  | 1st year      | 2/1432 ( 0.1%)  | 140301, 190135                                                                                         |
|                            | 2nd year      | 1/1166 ( <0.1%) | 160806                                                                                                 |
|                            | Overall       | 3/1432 ( 0.2%)  | 140301, 160806, 190135                                                                                 |
| Hyperventilation           | 1st year      | 1/1432 ( <0.1%) | 160741                                                                                                 |
|                            | Overall       | 1/1432 ( <0.1%) | 160741                                                                                                 |
| Nasal congestion           | 1st year      | 1/1432 ( <0.1%) | 241807                                                                                                 |
|                            | 2nd year      | 1/1166 ( <0.1%) | 160631                                                                                                 |
|                            | Overall       | 2/1432 ( 0.1%)  | 160631, 241807                                                                                         |
| Nasal disorder             | 3rd year      | 1/ 963 ( 0.1%)  | 200624                                                                                                 |
|                            | Overall       | 1/1432 ( <0.1%) | 200624                                                                                                 |
| Nasal oedema               | 1st year      | 1/1432 ( <0.1%) | 243969                                                                                                 |
|                            | Overall       | 1/1432 ( <0.1%) | 243969                                                                                                 |

**Table 14.3.1 / 10: Number of subjects with adverse events including subject identifier and year by treatment (FAS)**

TREATMENT: LCS12

Primary system organ class

| Preferred term<br>MedDRA version 14.0 | YEAR OF<br>ONSET | N (%)           | subject identifier                                                                                                                     |
|---------------------------------------|------------------|-----------------|----------------------------------------------------------------------------------------------------------------------------------------|
| Nasal polyps                          | 1st year         | 1/1432 ( <0.1%) | 170606                                                                                                                                 |
|                                       | Overall          | 1/1432 ( <0.1%) | 170606                                                                                                                                 |
| Oropharyngeal pain                    | 1st year         | 7/1432 ( 0.5%)  | 160609, 200911, 230604, 242907, 244125, 244407, 245528                                                                                 |
|                                       | 2nd year         | 9/1166 ( 0.8%)  | 120632, 141403, 161426, 161440, 170702, 230604, 242812, 242907, 244426                                                                 |
|                                       | 3rd year         | 3/ 963 ( 0.3%)  | 160623, 245431, 246212                                                                                                                 |
|                                       | Overall          | 17/1432 ( 1.2%) | 120632, 141403, 160609, 160623, 161426, 161440, 170702, 200911, 230604, 242812, 242907, 244125, 244407, 244426, 245431, 245528, 246212 |
| Pleurisy                              | 2nd year         | 1/1166 ( <0.1%) | 244430                                                                                                                                 |
|                                       | Overall          | 1/1432 ( <0.1%) | 244430                                                                                                                                 |
| Pneumothorax                          | 2nd year         | 1/1166 ( <0.1%) | 240510                                                                                                                                 |
|                                       | Overall          | 1/1432 ( <0.1%) | 240510                                                                                                                                 |
| Pulmonary congestion                  | 1st year         | 1/1432 ( <0.1%) | 241532                                                                                                                                 |
|                                       | Overall          | 1/1432 ( <0.1%) | 241532                                                                                                                                 |
| Respiratory tract congestion          | 2nd year         | 1/1166 ( <0.1%) | 244310                                                                                                                                 |
|                                       | Overall          | 1/1432 ( <0.1%) | 244310                                                                                                                                 |
| Respiratory tract inflammation        | 2nd year         | 1/1166 ( <0.1%) | 160985                                                                                                                                 |
|                                       | Overall          | 1/1432 ( <0.1%) | 160985                                                                                                                                 |
| Rhinitis allergic                     | 1st year         | 6/1432 ( 0.4%)  | 140116, 141032, 150101, 160505, 160519, 160573                                                                                         |
|                                       | 2nd year         | 3/1166 ( 0.3%)  | 160519, 240729, 244412                                                                                                                 |
|                                       | 3rd year         | 2/ 963 ( 0.2%)  | 200505, 210411                                                                                                                         |
|                                       | Overall          | 10/1432 ( 0.7%) | 140116, 141032, 150101, 160505, 160519, 160573, 200505, 210411, 240729, 244412                                                         |
| Rhinitis seasonal                     | 1st year         | 1/1432 ( <0.1%) | 243969                                                                                                                                 |
|                                       | Overall          | 1/1432 ( <0.1%) | 243969                                                                                                                                 |
| Rhinorrhoea                           | 1st year         | 1/1432 ( <0.1%) | 240508                                                                                                                                 |
|                                       | Overall          | 1/1432 ( <0.1%) | 240508                                                                                                                                 |

**Table 14.3.1 / 10: Number of subjects with adverse events including subject identifier and year by treatment (FAS)**

TREATMENT: LCS12

Primary system organ class

| Preferred term<br>MedDRA version 14.0  | YEAR OF<br>ONSET | N (%)             | subject identifier                             |
|----------------------------------------|------------------|-------------------|------------------------------------------------|
| Sinus congestion                       | 1st year         | 4/1432 ( 0.3%)    | 243972, 244934, 245701, 245910                 |
|                                        | 2nd year         | 1/1166 (<0.1%)    | 243702                                         |
|                                        | 3rd year         | 1/ 963 ( 0.1%)    | 246212                                         |
|                                        | Overall          | 6/1432 ( 0.4%)    | 243702, 243972, 244934, 245701, 245910, 246212 |
|                                        | Wheezing         | 1st year          | 1/1432 (<0.1%)                                 |
|                                        | Overall          | 1/1432 (<0.1%)    | 244438                                         |
| Skin and subcutaneous tissue disorders | 1st year         | 190/1432 ( 13.3%) |                                                |
|                                        | 2nd year         | 45/1166 ( 3.9%)   |                                                |
|                                        | 3rd year         | 25/ 963 ( 2.6%)   |                                                |
|                                        | Overall          | 242/1432 ( 16.9%) |                                                |

**Table 14.3.1 / 10: Number of subjects with adverse events including subject identifier and year by treatment (FAS)**

TREATMENT: LCS12

Primary system organ class

| Preferred term<br>MedDRA version 14.0 | YEAR OF<br>ONSET | N (%)             | subject identifier                                                                                                                                                                                                                                                                                                                                                                                                                                                                                                                                                                                                                                                                                                                                                                                                                                                                                                                                                                                                                                                                                                                                     |
|---------------------------------------|------------------|-------------------|--------------------------------------------------------------------------------------------------------------------------------------------------------------------------------------------------------------------------------------------------------------------------------------------------------------------------------------------------------------------------------------------------------------------------------------------------------------------------------------------------------------------------------------------------------------------------------------------------------------------------------------------------------------------------------------------------------------------------------------------------------------------------------------------------------------------------------------------------------------------------------------------------------------------------------------------------------------------------------------------------------------------------------------------------------------------------------------------------------------------------------------------------------|
| Acne                                  | 1st year         | 139/1432 ( 9.7%)  | 120201, 120208, 120228, 120329, 120401, 120412, 120414, 120633, 140114, 140118, 140204, 140206, 140301, 140502, 140518, 140519, 140529, 140802, 140813, 140904, 140914, 141022, 141029, 141106, 141109, 141409, 150111, 150136, 150151, 150153, 160106, 160217, 160220, 160305, 160310, 160311, 160323, 160416, 160418, 160434, 160505, 160509, 160615, 160617, 160624, 160625, 160705, 160722, 160725, 160726, 160734, 160742, 160746, 160754, 160758, 160935, 160959, 160965, 160982, 160985, 161130, 161203, 161215, 161301, 161312, 161322, 161411, 161414, 161440, 161516, 161533, 170304, 170704, 180612, 180645, 180655, 180739, 200109, 200208, 200216, 200227, 200408, 200501, 200521, 200527, 200914, 200919, 210130, 210205, 210404, 210606, 230221, 230310, 230406, 230603, 230824, 230903, 231002, 240217, 240223, 240345, 240352, 240508, 240811, 240836, 241028, 241153, 241175, 241231, 241405, 241512, 241553, 241902, 242215, 242316, 242320, 242510, 243003, 243320, 243323, 243820, 243929, 244203, 244407, 244441, 244448, 244511, 244518, 244707, 245432, 245502, 245506, 245508, 245528, 245709, 245903, 245916, 246116, 246144 |
|                                       | 2nd year         | 20/1166 ( 1.7%)   | 140208, 141412, 160310, 160416, 160440, 160914, 161106, 161322, 161511, 180621, 180652, 200201, 200709, 242212, 243617, 243830, 243945, 244522, 244918, 245508                                                                                                                                                                                                                                                                                                                                                                                                                                                                                                                                                                                                                                                                                                                                                                                                                                                                                                                                                                                         |
|                                       | 3rd year         | 10/ 963 ( 1.0%)   | 141029, 160910, 161117, 161122, 161301, 170608, 200115, 243514, 245019, 245519                                                                                                                                                                                                                                                                                                                                                                                                                                                                                                                                                                                                                                                                                                                                                                                                                                                                                                                                                                                                                                                                         |
|                                       | Overall          | 163/1432 ( 11.4%) | 120201, 120208, 120228, 120329, 120401, 120412, 120414, 120633, 140114, 140118, 140204, 140206, 140208, 140301, 140502, 140518, 140519, 140529, 140802, 140813, 140904, 140914, 141022, 141029, 141106,                                                                                                                                                                                                                                                                                                                                                                                                                                                                                                                                                                                                                                                                                                                                                                                                                                                                                                                                                |

**Table 14.3.1 / 10: Number of subjects with adverse events including subject identifier and year by treatment (FAS)**

| TREATMENT: LCS12           |               |                 |                                                                                                                                                                                                                                                                                                                                                                                                                                                                                                                                                                                                                                                                                                                                                                                                                                                                                                                                                                                                                                                                                                                                                |
|----------------------------|---------------|-----------------|------------------------------------------------------------------------------------------------------------------------------------------------------------------------------------------------------------------------------------------------------------------------------------------------------------------------------------------------------------------------------------------------------------------------------------------------------------------------------------------------------------------------------------------------------------------------------------------------------------------------------------------------------------------------------------------------------------------------------------------------------------------------------------------------------------------------------------------------------------------------------------------------------------------------------------------------------------------------------------------------------------------------------------------------------------------------------------------------------------------------------------------------|
| Primary system organ class |               |                 |                                                                                                                                                                                                                                                                                                                                                                                                                                                                                                                                                                                                                                                                                                                                                                                                                                                                                                                                                                                                                                                                                                                                                |
| Preferred term             | YEAR OF ONSET |                 | subject identifier                                                                                                                                                                                                                                                                                                                                                                                                                                                                                                                                                                                                                                                                                                                                                                                                                                                                                                                                                                                                                                                                                                                             |
| MedDRA version 14.0        |               | N (%)           |                                                                                                                                                                                                                                                                                                                                                                                                                                                                                                                                                                                                                                                                                                                                                                                                                                                                                                                                                                                                                                                                                                                                                |
|                            |               |                 | 141109, 141409, 141412, 150111, 150136, 150151, 150153, 160106, 160217, 160220, 160305, 160310, 160311, 160323, 160416, 160418, 160434, 160440, 160505, 160509, 160615, 160617, 160624, 160625, 160705, 160722, 160725, 160726, 160734, 160742, 160746, 160754, 160758, 160910, 160914, 160935, 160959, 160965, 160982, 160985, 161106, 161117, 161122, 161130, 161203, 161215, 161301, 161312, 161322, 161411, 161414, 161440, 161511, 161516, 161533, 170304, 170608, 170704, 180612, 180621, 180645, 180652, 180655, 180739, 200109, 200115, 200201, 200208, 200216, 200227, 200408, 200501, 200521, 200527, 200709, 200914, 200919, 210130, 210205, 210404, 210606, 230221, 230310, 230406, 230603, 230824, 230903, 231002, 240217, 240223, 240345, 240352, 240508, 240811, 240836, 241028, 241153, 241175, 241231, 241405, 241512, 241553, 241902, 242212, 242215, 242316, 242320, 242510, 243003, 243320, 243323, 243514, 243617, 243820, 243830, 243929, 243945, 244203, 244407, 244441, 244448, 244511, 244518, 244522, 244707, 244918, 245019, 245432, 245502, 245506, 245508, 245519, 245528, 245709, 245903, 245916, 246116, 246144 |
| Acne cystic                | 1st year      | 1/1432 ( <0.1%) | 240359                                                                                                                                                                                                                                                                                                                                                                                                                                                                                                                                                                                                                                                                                                                                                                                                                                                                                                                                                                                                                                                                                                                                         |
|                            | 2nd year      | 1/1166 ( <0.1%) | 245410                                                                                                                                                                                                                                                                                                                                                                                                                                                                                                                                                                                                                                                                                                                                                                                                                                                                                                                                                                                                                                                                                                                                         |
|                            | Overall       | 2/1432 ( 0.1%)  | 240359, 245410                                                                                                                                                                                                                                                                                                                                                                                                                                                                                                                                                                                                                                                                                                                                                                                                                                                                                                                                                                                                                                                                                                                                 |
| Alopecia                   | 1st year      | 10/1432 ( 0.7%) | 160509, 160606, 160954, 200904, 231103, 241507, 243969, 244203, 244518, 246138                                                                                                                                                                                                                                                                                                                                                                                                                                                                                                                                                                                                                                                                                                                                                                                                                                                                                                                                                                                                                                                                 |
|                            | 2nd year      | 6/1166 ( 0.5%)  | 120323, 120626, 141412, 241305, 244203, 244918                                                                                                                                                                                                                                                                                                                                                                                                                                                                                                                                                                                                                                                                                                                                                                                                                                                                                                                                                                                                                                                                                                 |
|                            | Overall       | 15/1432 ( 1.0%) | 120323, 120626, 141412, 160509, 160606, 160954, 200904, 231103, 241305, 241507, 243969, 244203, 244518, 244918, 246138                                                                                                                                                                                                                                                                                                                                                                                                                                                                                                                                                                                                                                                                                                                                                                                                                                                                                                                                                                                                                         |

**Table 14.3.1 / 10: Number of subjects with adverse events including subject identifier and year by treatment (FAS)**

TREATMENT: LCS12

Primary system organ class

| Preferred term<br>MedDRA version 14.0 | YEAR OF<br>ONSET | N (%)           | subject identifier                                             |
|---------------------------------------|------------------|-----------------|----------------------------------------------------------------|
| Alopecia areata                       | 2nd year         | 1/1166 ( <0.1%) | 150112                                                         |
|                                       | 3rd year         | 1/ 963 ( 0.1%)  | 241504                                                         |
|                                       | Overall          | 2/1432 ( 0.1%)  | 150112, 241504                                                 |
| Chloasma                              | 1st year         | 3/1432 ( 0.2%)  | 120414, 244448, 245928                                         |
|                                       | Overall          | 3/1432 ( 0.2%)  | 120414, 244448, 245928                                         |
| Cold sweat                            | 3rd year         | 1/ 963 ( 0.1%)  | 245807                                                         |
|                                       | Overall          | 1/1432 ( <0.1%) | 245807                                                         |
| Dandruff                              | 1st year         | 1/1432 ( <0.1%) | 160705                                                         |
|                                       | Overall          | 1/1432 ( <0.1%) | 160705                                                         |
| Dermal cyst                           | 1st year         | 2/1432 ( 0.1%)  | 241536, 244710                                                 |
|                                       | Overall          | 2/1432 ( 0.1%)  | 241536, 244710                                                 |
| Dermatitis                            | 1st year         | 4/1432 ( 0.3%)  | 120602, 140210, 160951, 210136                                 |
|                                       | 2nd year         | 3/1166 ( 0.3%)  | 150167, 160960, 243015                                         |
|                                       | 3rd year         | 1/ 963 ( 0.1%)  | 161411                                                         |
|                                       | Overall          | 8/1432 ( 0.6%)  | 120602, 140210, 150167, 160951, 160960, 161411, 210136, 243015 |
| Dermatitis allergic                   | 1st year         | 2/1432 ( 0.1%)  | 140117, 161205                                                 |
|                                       | 2nd year         | 1/1166 ( <0.1%) | 141004                                                         |
|                                       | 3rd year         | 3/ 963 ( 0.3%)  | 141032, 161018, 200121                                         |
|                                       | Overall          | 6/1432 ( 0.4%)  | 140117, 141004, 141032, 161018, 161205, 200121                 |
| Dermatitis atopic                     | 2nd year         | 2/1166 ( 0.2%)  | 150112, 161114                                                 |
|                                       | Overall          | 2/1432 ( 0.1%)  | 150112, 161114                                                 |
| Dermatitis contact                    | 1st year         | 1/1432 ( <0.1%) | 245808                                                         |
|                                       | 2nd year         | 1/1166 ( <0.1%) | 241305                                                         |
|                                       | Overall          | 2/1432 ( 0.1%)  | 241305, 245808                                                 |
| Drug eruption                         | 2nd year         | 1/1166 ( <0.1%) | 200910                                                         |
|                                       | Overall          | 1/1432 ( <0.1%) | 200910                                                         |
| Dyshidrosis                           | 1st year         | 1/1432 ( <0.1%) | 120632                                                         |
|                                       | Overall          | 1/1432 ( <0.1%) | 120632                                                         |



**Table 14.3.1 / 10: Number of subjects with adverse events including subject identifier and year by treatment (FAS)**

TREATMENT: LCS12

Primary system organ class

| Preferred term<br>MedDRA version 14.0 | YEAR OF<br>ONSET | N (%)           | subject identifier                                     |
|---------------------------------------|------------------|-----------------|--------------------------------------------------------|
| Eczema                                | 1st year         | 4/1432 ( 0.3%)  | 140519, 160323, 160576, 244414                         |
|                                       | 2nd year         | 2/1166 ( 0.2%)  | 140105, 141419                                         |
|                                       | 3rd year         | 1/ 963 ( 0.1%)  | 140105                                                 |
|                                       | Overall          | 6/1432 ( 0.4%)  | 140105, 140519, 141419, 160323, 160576, 244414         |
| Erythema                              | 1st year         | 1/1432 ( <0.1%) | 140802                                                 |
|                                       | 2nd year         | 1/1166 ( <0.1%) | 141101                                                 |
|                                       | Overall          | 2/1432 ( 0.1%)  | 140802, 141101                                         |
| Erythema multiforme                   | 2nd year         | 1/1166 ( <0.1%) | 245431                                                 |
|                                       | 3rd year         | 1/ 963 ( 0.1%)  | 245431                                                 |
|                                       | Overall          | 1/1432 ( <0.1%) | 245431                                                 |
| Hidradenitis                          | 1st year         | 1/1432 ( <0.1%) | 230908                                                 |
|                                       | Overall          | 1/1432 ( <0.1%) | 230908                                                 |
| Hirsutism                             | 1st year         | 7/1432 ( 0.5%)  | 120414, 150111, 200614, 230221, 241302, 241512, 244412 |
|                                       | Overall          | 7/1432 ( 0.5%)  | 120414, 150111, 200614, 230221, 241302, 241512, 244412 |
| Hyperhidrosis                         | 1st year         | 3/1432 ( 0.2%)  | 161511, 200919, 241406                                 |
|                                       | Overall          | 3/1432 ( 0.2%)  | 161511, 200919, 241406                                 |
| Hyperkeratosis                        | 1st year         | 1/1432 ( <0.1%) | 200601                                                 |
|                                       | Overall          | 1/1432 ( <0.1%) | 200601                                                 |
| Hypertrichosis                        | 1st year         | 2/1432 ( 0.1%)  | 160935, 210205                                         |
|                                       | Overall          | 2/1432 ( 0.1%)  | 160935, 210205                                         |
| Idiopathic urticaria                  | 1st year         | 1/1432 ( <0.1%) | 241712                                                 |
|                                       | Overall          | 1/1432 ( <0.1%) | 241712                                                 |
| Increased tendency to bruise          | 3rd year         | 1/ 963 ( 0.1%)  | 244919                                                 |
|                                       | Overall          | 1/1432 ( <0.1%) | 244919                                                 |
| Ingrown hair                          | 2nd year         | 1/1166 ( <0.1%) | 245808                                                 |
|                                       | Overall          | 1/1432 ( <0.1%) | 245808                                                 |

**Table 14.3.1 / 10: Number of subjects with adverse events including subject identifier and year by treatment (FAS)**

TREATMENT: LCS12

Primary system organ class

| Preferred term<br>MedDRA version 14.0 | YEAR OF<br>ONSET | N (%)           | subject identifier                                                             |
|---------------------------------------|------------------|-----------------|--------------------------------------------------------------------------------|
| Intertrigo                            | 2nd year         | 1/1166 ( <0.1%) | 140817                                                                         |
|                                       | Overall          | 1/1432 ( <0.1%) | 140817                                                                         |
| Lentigo                               | 3rd year         | 1/ 963 ( 0.1%)  | 241504                                                                         |
|                                       | Overall          | 1/1432 ( <0.1%) | 241504                                                                         |
| Lichen sclerosus                      | 2nd year         | 1/1166 ( <0.1%) | 160962                                                                         |
|                                       | Overall          | 1/1432 ( <0.1%) | 160962                                                                         |
| Pityriasis rosea                      | 1st year         | 1/1432 ( <0.1%) | 246111                                                                         |
|                                       | Overall          | 1/1432 ( <0.1%) | 246111                                                                         |
| Pruritus                              | 1st year         | 3/1432 ( 0.2%)  | 140519, 241545, 244518                                                         |
|                                       | 3rd year         | 1/ 963 ( 0.1%)  | 120312                                                                         |
|                                       | Overall          | 4/1432 ( 0.3%)  | 120312, 140519, 241545, 244518                                                 |
| Rash                                  | 1st year         | 6/1432 ( 0.4%)  | 160415, 210120, 241416, 241507, 242907, 243204                                 |
|                                       | 2nd year         | 2/1166 ( 0.2%)  | 241536, 241708                                                                 |
|                                       | 3rd year         | 2/ 963 ( 0.2%)  | 140808, 160617                                                                 |
|                                       | Overall          | 10/1432 ( 0.7%) | 140808, 160415, 160617, 210120, 241416, 241507, 241536, 241708, 242907, 243204 |
| Rash papular                          | 1st year         | 1/1432 ( <0.1%) | 243308                                                                         |
|                                       | 2nd year         | 1/1166 ( <0.1%) | 244412                                                                         |
|                                       | Overall          | 2/1432 ( 0.1%)  | 243308, 244412                                                                 |
| Rosacea                               | 2nd year         | 1/1166 ( <0.1%) | 160952                                                                         |
|                                       | Overall          | 1/1432 ( <0.1%) | 160952                                                                         |
| Seborrhoea                            | 1st year         | 6/1432 ( 0.4%)  | 160301, 160509, 160574, 160806, 161403, 161406                                 |
|                                       | Overall          | 7/1432 ( 0.5%)  | 160301, 160509, 160574, 160806, 161111, 161403, 161406                         |
| Skin dystrophy                        | 1st year         | 1/1432 ( <0.1%) | 200901                                                                         |
|                                       | Overall          | 1/1432 ( <0.1%) | 200901                                                                         |
| Skin irritation                       | 1st year         | 1/1432 ( <0.1%) | 160803                                                                         |
|                                       | Overall          | 1/1432 ( <0.1%) | 160803                                                                         |

**Table 14.3.1 / 10: Number of subjects with adverse events including subject identifier and year by treatment (FAS)**

TREATMENT: LCS12

Primary system organ class

| Preferred term<br>MedDRA version 14.0 | YEAR OF<br>ONSET | N (%)           | subject identifier                                                                     |
|---------------------------------------|------------------|-----------------|----------------------------------------------------------------------------------------|
| Skin reaction                         | 1st year         | 2/1432 ( 0.1%)  | 241531, 241605                                                                         |
|                                       | Overall          | 2/1432 ( 0.1%)  | 241531, 241605                                                                         |
| Urticaria                             | 1st year         | 7/1432 ( 0.5%)  | 150123, 160415, 160924, 161301, 230112, 243948, 244927                                 |
|                                       | 2nd year         | 2/1166 ( 0.2%)  | 161301, 245807                                                                         |
|                                       | 3rd year         | 3/ 963 ( 0.3%)  | 140519, 160613, 242320                                                                 |
|                                       | Overall          | 11/1432 ( 0.8%) | 140519, 150123, 160415, 160613, 160924, 161301, 230112, 242320, 243948, 244927, 245807 |
| Social circumstances                  | 1st year         | 1/1432 ( <0.1%) |                                                                                        |
|                                       | Overall          | 1/1432 ( <0.1%) |                                                                                        |
| Exposure to communicable disease      | 1st year         | 1/1432 ( <0.1%) | 240503                                                                                 |
|                                       | Overall          | 1/1432 ( <0.1%) | 240503                                                                                 |
| Surgical and medical procedures       | 1st year         | 17/1432 ( 1.2%) |                                                                                        |
|                                       | 2nd year         | 14/1166 ( 1.2%) |                                                                                        |
|                                       | 3rd year         | 10/ 963 ( 1.0%) |                                                                                        |
|                                       | Overall          | 40/1432 ( 2.8%) |                                                                                        |
| Abdominoplasty                        | 1st year         | 2/1432 ( 0.1%)  | 120604, 160436                                                                         |
|                                       | 2nd year         | 1/1166 ( <0.1%) | 242307                                                                                 |
|                                       | 3rd year         | 1/ 963 ( 0.1%)  | 245503                                                                                 |
|                                       | Overall          | 4/1432 ( 0.3%)  | 120604, 160436, 242307, 245503                                                         |
| Anal fissure excision                 | 2nd year         | 1/1166 ( <0.1%) | 141004                                                                                 |
|                                       | Overall          | 1/1432 ( <0.1%) | 141004                                                                                 |
| Breast prosthesis implantation        | 1st year         | 2/1432 ( 0.1%)  | 160436, 240348                                                                         |
|                                       | 2nd year         | 1/1166 ( <0.1%) | 120626                                                                                 |
|                                       | Overall          | 3/1432 ( 0.2%)  | 120626, 160436, 240348                                                                 |
| Bunion operation                      | 1st year         | 1/1432 ( <0.1%) | 210411                                                                                 |
|                                       | 2nd year         | 1/1166 ( <0.1%) | 160746                                                                                 |
|                                       | Overall          | 2/1432 ( 0.1%)  | 160746, 210411                                                                         |
| Cholecystectomy                       | 2nd year         | 1/1166 ( <0.1%) | 243617                                                                                 |
|                                       | Overall          | 1/1432 ( <0.1%) | 243617                                                                                 |

**Table 14.3.1 / 10: Number of subjects with adverse events including subject identifier and year by treatment (FAS)**

TREATMENT: LCS12

Primary system organ class

| Preferred term<br>MedDRA version 14.0 | YEAR OF<br>ONSET | N (%)           | subject identifier                             |
|---------------------------------------|------------------|-----------------|------------------------------------------------|
| Dental cosmetic procedure             | 3rd year         | 1/ 963 ( 0.1%)  | 244430                                         |
|                                       | Overall          | 1/1432 ( <0.1%) | 244430                                         |
| Dental operation                      | 2nd year         | 1/1166 ( <0.1%) | 120312                                         |
|                                       | Overall          | 1/1432 ( <0.1%) | 120312                                         |
| Detoxification                        | 3rd year         | 1/ 963 ( 0.1%)  | 241708                                         |
|                                       | Overall          | 1/1432 ( <0.1%) | 241708                                         |
| Gastric banding                       | 1st year         | 1/1432 ( <0.1%) | 243502                                         |
|                                       | Overall          | 1/1432 ( <0.1%) | 243502                                         |
| Ligament operation                    | 3rd year         | 1/ 963 ( 0.1%)  | 230613                                         |
|                                       | Overall          | 1/1432 ( <0.1%) | 230613                                         |
| Lipoma excision                       | 2nd year         | 1/1166 ( <0.1%) | 140116                                         |
|                                       | Overall          | 1/1432 ( <0.1%) | 140116                                         |
| Mammoplasty                           | 1st year         | 2/1432 ( 0.1%)  | 230318, 230607                                 |
|                                       | 2nd year         | 2/1166 ( 0.2%)  | 141026, 242315                                 |
|                                       | 3rd year         | 3/ 963 ( 0.3%)  | 241302, 242315, 245503                         |
|                                       | Overall          | 6/1432 ( 0.4%)  | 141026, 230318, 230607, 241302, 242315, 245503 |
| Maxillary antrum operation            | 1st year         | 1/1432 ( <0.1%) | 200501                                         |
|                                       | Overall          | 1/1432 ( <0.1%) | 200501                                         |
| Mole excision                         | 1st year         | 2/1432 ( 0.1%)  | 200709, 210111                                 |
|                                       | Overall          | 2/1432 ( 0.1%)  | 200709, 210111                                 |
| Postoperative analgesia               | 2nd year         | 1/1166 ( <0.1%) | 246220                                         |
|                                       | Overall          | 1/1432 ( <0.1%) | 246220                                         |
| Tonsillectomy                         | 2nd year         | 1/1166 ( <0.1%) | 241113                                         |
|                                       | Overall          | 1/1432 ( <0.1%) | 241113                                         |

**Table 14.3.1 / 10: Number of subjects with adverse events including subject identifier and year by treatment (FAS)**

TREATMENT: LCS12

Primary system organ class

| Preferred term<br>MedDRA version 14.0 | YEAR OF<br>ONSET | N (%)           | subject identifier                                                                     |
|---------------------------------------|------------------|-----------------|----------------------------------------------------------------------------------------|
| Tooth extraction                      | 1st year         | 1/1432 ( <0.1%) | 150108                                                                                 |
|                                       | 2nd year         | 2/1166 ( 0.2%)  | 120623, 150167                                                                         |
|                                       | 3rd year         | 3/ 963 ( 0.3%)  | 120613, 160981, 244408                                                                 |
|                                       | Overall          | 6/1432 ( 0.4%)  | 120613, 120623, 150108, 150167, 160981, 244408                                         |
| Varicose vein operation               | 3rd year         | 1/ 963 ( 0.1%)  | 160928                                                                                 |
|                                       | Overall          | 1/1432 ( <0.1%) | 160928                                                                                 |
| Wisdom teeth removal                  | 1st year         | 6/1432 ( 0.4%)  | 150156, 160949, 161424, 240634, 240739, 243919                                         |
|                                       | 2nd year         | 1/1166 ( <0.1%) | 243121                                                                                 |
|                                       | Overall          | 7/1432 ( 0.5%)  | 150156, 160949, 161424, 240634, 240739, 243121, 243919                                 |
| Vascular disorders                    | 1st year         | 14/1432 ( 1.0%) |                                                                                        |
|                                       | 2nd year         | 4/1166 ( 0.3%)  |                                                                                        |
|                                       | 3rd year         | 4/ 963 ( 0.4%)  |                                                                                        |
|                                       | Overall          | 20/1432 ( 1.4%) |                                                                                        |
| Deep vein thrombosis                  | 1st year         | 1/1432 ( <0.1%) | 140807                                                                                 |
|                                       | Overall          | 1/1432 ( <0.1%) | 140807                                                                                 |
| Hot flush                             | 1st year         | 4/1432 ( 0.3%)  | 140802, 240217, 241168, 244618                                                         |
|                                       | Overall          | 4/1432 ( 0.3%)  | 140802, 240217, 241168, 244618                                                         |
| Hypertension                          | 1st year         | 6/1432 ( 0.4%)  | 160331, 180707, 200705, 242320, 243302, 244523                                         |
|                                       | 2nd year         | 3/1166 ( 0.3%)  | 160509, 180669, 200912                                                                 |
|                                       | 3rd year         | 3/ 963 ( 0.3%)  | 160567, 180420, 242320                                                                 |
|                                       | Overall          | 11/1432 ( 0.8%) | 160331, 160509, 160567, 180420, 180669, 180707, 200705, 200912, 242320, 243302, 244523 |
| Hypotension                           | 1st year         | 1/1432 ( <0.1%) | 120208                                                                                 |
|                                       | Overall          | 1/1432 ( <0.1%) | 120208                                                                                 |
| Neurogenic shock                      | 1st year         | 2/1432 ( 0.1%)  | 140105, 140114                                                                         |
|                                       | Overall          | 2/1432 ( 0.1%)  | 140105, 140114                                                                         |
| Thrombophlebitis superficial          | 2nd year         | 1/1166 ( <0.1%) | 140807                                                                                 |
|                                       | Overall          | 1/1432 ( <0.1%) | 140807                                                                                 |

**Table 14.3.1 / 10: Number of subjects with adverse events including subject identifier and year by treatment (FAS)**

TREATMENT: LCS12

Primary system organ class

| Preferred term      | YEAR OF ONSET |        | N (%)       | subject identifier |
|---------------------|---------------|--------|-------------|--------------------|
| MedDRA version 14.0 |               |        |             |                    |
| Varicose vein       | 3rd year      | 1/     | 963 ( 0.1%) | 120401             |
|                     | Overall       | 1/1432 | (<0.1%)     | 120401             |

Note: A subject is counted only once within each preferred term of any primary SOC.

Note: Denominator is number of subjects available at the START of the year or all subjects for overall

Note: Adverse events are sorted in alphabetical order by primary SOC and preferred term.

Global Biostatistics: /by-sasp/patdb/projects/de04209/310442/stat/prod\_interim03/pgms/t-ae-cat.sas epkl 12OCT2011 11:21

Table 14.3.1 / 10: Number of subjects with adverse events including subject identifier and year by treatment (FAS)  
 (cont.)

TREATMENT: LCS16

| Primary system organ class<br>Preferred term<br>MedDRA version 14.0 | YEAR OF<br>ONSET | N (%)              | subject identifier     |
|---------------------------------------------------------------------|------------------|--------------------|------------------------|
| Number of subjects (%) with at least one adverse event              | 1st year         | 1068/1452 ( 73.6%) |                        |
|                                                                     | 2nd year         | 670/1206 ( 55.6%)  |                        |
|                                                                     | 3rd year         | 535/1012 ( 52.9%)  |                        |
|                                                                     | Overall          | 1246/1452 ( 85.8%) |                        |
| Blood and lymphatic system disorders                                | 1st year         | 3/1452 ( 0.2%)     |                        |
|                                                                     | 2nd year         | 2/1206 ( 0.2%)     |                        |
|                                                                     | 3rd year         | 3/1012 ( 0.3%)     |                        |
|                                                                     | Overall          | 8/1452 ( 0.6%)     |                        |
| Anaemia                                                             | 1st year         | 1/1452 ( <0.1%)    | 161019                 |
|                                                                     | 2nd year         | 1/1206 ( <0.1%)    | 120603                 |
|                                                                     | 3rd year         | 1/1012 ( <0.1%)    | 241229                 |
|                                                                     | Overall          | 3/1452 ( 0.2%)     | 120603, 161019, 241229 |
| Iron deficiency anaemia                                             | 1st year         | 1/1452 ( <0.1%)    | 140812                 |
|                                                                     | Overall          | 1/1452 ( <0.1%)    | 140812                 |
| Lymphadenopathy                                                     | 1st year         | 1/1452 ( <0.1%)    | 245922                 |
|                                                                     | 3rd year         | 2/1012 ( 0.2%)     | 160552, 200930         |
|                                                                     | Overall          | 3/1452 ( 0.2%)     | 160552, 200930, 245922 |
| Pancytopenia                                                        | 2nd year         | 1/1206 ( <0.1%)    | 242704                 |
|                                                                     | Overall          | 1/1452 ( <0.1%)    | 242704                 |
| Cardiac disorders                                                   | 1st year         | 8/1452 ( 0.6%)     |                        |
|                                                                     | 2nd year         | 4/1206 ( 0.3%)     |                        |
|                                                                     | 3rd year         | 3/1012 ( 0.3%)     |                        |
|                                                                     | Overall          | 14/1452 ( 1.0%)    |                        |
| Arrhythmia                                                          | 1st year         | 2/1452 ( 0.1%)     | 160115, 161405         |
|                                                                     | Overall          | 2/1452 ( 0.1%)     | 160115, 161405         |
| Extrasystoles                                                       | 1st year         | 1/1452 ( <0.1%)    | 160942                 |
|                                                                     | 3rd year         | 1/1012 ( <0.1%)    | 160950                 |
|                                                                     | Overall          | 2/1452 ( 0.1%)     | 160942, 160950         |

Table 14.3.1 / 10: Number of subjects with adverse events including subject identifier and year by treatment (FAS)  
 (cont.)

TREATMENT: LCS16

| Primary system organ class                 | YEAR OF ONSET | N (%)           | subject identifier                             |
|--------------------------------------------|---------------|-----------------|------------------------------------------------|
| Mitral valve prolapse                      | 1st year      | 1/1452 ( <0.1%) | 180629                                         |
|                                            | 2nd year      | 1/1206 ( <0.1%) | 180660                                         |
|                                            | Overall       | 2/1452 ( 0.1%)  | 180629, 180660                                 |
| Palpitations                               | 1st year      | 2/1452 ( 0.1%)  | 180660, 241555                                 |
|                                            | 2nd year      | 3/1206 ( 0.2%)  | 200510, 242912, 244704                         |
|                                            | 3rd year      | 1/1012 ( <0.1%) | 161432                                         |
|                                            | Overall       | 6/1452 ( 0.4%)  | 161432, 180660, 200510, 241555, 242912, 244704 |
| Sinus tachycardia                          | 1st year      | 1/1452 ( <0.1%) | 180629                                         |
|                                            | Overall       | 1/1452 ( <0.1%) | 180629                                         |
| Tachycardia                                | 1st year      | 2/1452 ( 0.1%)  | 120614, 160802                                 |
|                                            | Overall       | 2/1452 ( 0.1%)  | 120614, 160802                                 |
| Ventricular extrasystoles                  | 3rd year      | 1/1012 ( <0.1%) | 240734                                         |
|                                            | Overall       | 1/1452 ( <0.1%) | 240734                                         |
| Congenital, familial and genetic disorders | 1st year      | 1/1452 ( <0.1%) |                                                |
|                                            | Overall       | 1/1452 ( <0.1%) |                                                |
| Myotonia congenita                         | 1st year      | 1/1452 ( <0.1%) | 244435                                         |
|                                            | Overall       | 1/1452 ( <0.1%) | 244435                                         |
| Ear and labyrinth disorders                | 1st year      | 5/1452 ( 0.3%)  |                                                |
|                                            | 2nd year      | 3/1206 ( 0.2%)  |                                                |
|                                            | 3rd year      | 7/1012 ( 0.7%)  |                                                |
|                                            | Overall       | 14/1452 ( 1.0%) |                                                |
| Ear pain                                   | 1st year      | 1/1452 ( <0.1%) | 140812                                         |
|                                            | 3rd year      | 2/1012 ( 0.2%)  | 160636, 161524                                 |
|                                            | Overall       | 3/1452 ( 0.2%)  | 140812, 160636, 161524                         |
| Meniere's disease                          | 3rd year      | 1/1012 ( <0.1%) | 160543                                         |
|                                            | Overall       | 1/1452 ( <0.1%) | 160543                                         |



Table 14.3.1 / 10: Number of subjects with adverse events including subject identifier and year by treatment (FAS)  
 (cont.)

TREATMENT: LCS16

| Primary system organ class<br>Preferred term<br>MedDRA version 14.0 | YEAR OF<br>ONSET | N (%)           | subject identifier                                                                                           |
|---------------------------------------------------------------------|------------------|-----------------|--------------------------------------------------------------------------------------------------------------|
| Middle ear effusion                                                 | 1st year         | 1/1452 ( <0.1%) | 244433                                                                                                       |
|                                                                     | 2nd year         | 1/1206 ( <0.1%) | 244605                                                                                                       |
|                                                                     | Overall          | 2/1452 ( 0.1%)  | 244433, 244605                                                                                               |
| Motion sickness                                                     | 1st year         | 1/1452 ( <0.1%) | 244514                                                                                                       |
|                                                                     | 3rd year         | 2/1012 ( 0.2%)  | 161107, 161524                                                                                               |
|                                                                     | Overall          | 3/1452 ( 0.2%)  | 161107, 161524, 244514                                                                                       |
| Otorrhoea                                                           | 2nd year         | 1/1206 ( <0.1%) | 244429                                                                                                       |
|                                                                     | Overall          | 1/1452 ( <0.1%) | 244429                                                                                                       |
| Vertigo                                                             | 1st year         | 2/1452 ( 0.1%)  | 180625, 180641                                                                                               |
|                                                                     | 2nd year         | 1/1206 ( <0.1%) | 243331                                                                                                       |
|                                                                     | 3rd year         | 3/1012 ( 0.3%)  | 161123, 190214, 244433                                                                                       |
|                                                                     | Overall          | 6/1452 ( 0.4%)  | 161123, 180625, 180641, 190214, 243331, 244433                                                               |
| Endocrine disorders                                                 | 1st year         | 14/1452 ( 1.0%) |                                                                                                              |
|                                                                     | 2nd year         | 1/1206 ( <0.1%) |                                                                                                              |
|                                                                     | 3rd year         | 6/1012 ( 0.6%)  |                                                                                                              |
|                                                                     | Overall          | 21/1452 ( 1.4%) |                                                                                                              |
| Goitre                                                              | 1st year         | 3/1452 ( 0.2%)  | 160629, 241402, 243937                                                                                       |
|                                                                     | 2nd year         | 1/1206 ( <0.1%) | 160543                                                                                                       |
|                                                                     | 3rd year         | 1/1012 ( <0.1%) | 160562                                                                                                       |
|                                                                     | Overall          | 5/1452 ( 0.3%)  | 160543, 160562, 160629, 241402, 243937                                                                       |
| Hyperthyroidism                                                     | 1st year         | 1/1452 ( <0.1%) | 180602                                                                                                       |
|                                                                     | 3rd year         | 1/1012 ( <0.1%) | 240631                                                                                                       |
|                                                                     | Overall          | 2/1452 ( 0.1%)  | 180602, 240631                                                                                               |
| Hypothyroidism                                                      | 1st year         | 9/1452 ( 0.6%)  | 120122, 120426, 120615, 161507, 230207, 241155,<br>241543, 243963, 244923                                    |
|                                                                     | 3rd year         | 4/1012 ( 0.4%)  | 120405, 150137, 230516, 241403                                                                               |
|                                                                     | Overall          | 13/1452 ( 0.9%) | 120122, 120405, 120426, 120615, 150137, 161507,<br>230207, 230516, 241155, 241403, 241543, 243963,<br>244923 |

Table 14.3.1 / 10: Number of subjects with adverse events including subject identifier and year by treatment (FAS)  
 (cont.)

TREATMENT: LCS16

| Primary system organ class<br>Preferred term<br>MedDRA version 14.0 | YEAR OF<br>ONSET | N (%)           | subject identifier                                                                                                     |
|---------------------------------------------------------------------|------------------|-----------------|------------------------------------------------------------------------------------------------------------------------|
| Thyroid mass                                                        | 1st year         | 1/1452 ( <0.1%) | 160502                                                                                                                 |
|                                                                     | Overall          | 1/1452 ( <0.1%) | 160502                                                                                                                 |
| Eye disorders                                                       | 1st year         | 11/1452 ( 0.8%) |                                                                                                                        |
|                                                                     | 2nd year         | 5/1206 ( 0.4%)  |                                                                                                                        |
|                                                                     | 3rd year         | 7/1012 ( 0.7%)  |                                                                                                                        |
|                                                                     | Overall          | 23/1452 ( 1.6%) |                                                                                                                        |
| Blepharitis                                                         | 1st year         | 2/1452 ( 0.1%)  | 140803, 245922                                                                                                         |
|                                                                     | Overall          | 2/1452 ( 0.1%)  | 140803, 245922                                                                                                         |
| Chalazion                                                           | 1st year         | 1/1452 ( <0.1%) | 140803                                                                                                                 |
|                                                                     | Overall          | 1/1452 ( <0.1%) | 140803                                                                                                                 |
| Conjunctivitis                                                      | 1st year         | 6/1452 ( 0.4%)  | 160123, 160508, 160808, 161404, 210408, 245922                                                                         |
|                                                                     | 2nd year         | 4/1206 ( 0.3%)  | 161115, 161310, 242208, 242918                                                                                         |
|                                                                     | 3rd year         | 5/1012 ( 0.5%)  | 160314, 160428, 161123, 161311, 161315                                                                                 |
|                                                                     | Overall          | 15/1452 ( 1.0%) | 160123, 160314, 160428, 160508, 160808, 161115, 161123, 161310, 161311, 161315, 161404, 210408, 242208, 242918, 245922 |
| Conjunctivitis allergic                                             | 3rd year         | 2/1012 ( 0.2%)  | 160744, 161131                                                                                                         |
|                                                                     | Overall          | 2/1452 ( 0.1%)  | 160744, 161131                                                                                                         |
| Eye inflammation                                                    | 2nd year         | 1/1206 ( <0.1%) | 161310                                                                                                                 |
|                                                                     | Overall          | 1/1452 ( <0.1%) | 161310                                                                                                                 |
| Eyelid cyst                                                         | 1st year         | 1/1452 ( <0.1%) | 245513                                                                                                                 |
|                                                                     | Overall          | 1/1452 ( <0.1%) | 245513                                                                                                                 |
| Iritis                                                              | 1st year         | 1/1452 ( <0.1%) | 160715                                                                                                                 |
|                                                                     | 2nd year         | 1/1206 ( <0.1%) | 242503                                                                                                                 |
|                                                                     | Overall          | 2/1452 ( 0.1%)  | 160715, 242503                                                                                                         |
| Myopia                                                              | 1st year         | 1/1452 ( <0.1%) | 160521                                                                                                                 |
|                                                                     | Overall          | 1/1452 ( <0.1%) | 160521                                                                                                                 |

Table 14.3.1 / 10: Number of subjects with adverse events including subject identifier and year by treatment (FAS)  
 (cont.)

TREATMENT: LCS16

| Primary system organ class | Preferred term<br>MedDRA version 14.0 | YEAR OF<br>ONSET | N (%)             | subject identifier                                                                        |
|----------------------------|---------------------------------------|------------------|-------------------|-------------------------------------------------------------------------------------------|
|                            | Ocular icterus                        | 1st year         | 1/1452 ( <0.1%)   | 200707                                                                                    |
|                            |                                       | Overall          | 1/1452 ( <0.1%)   | 200707                                                                                    |
|                            | Gastrointestinal disorders            | 1st year         | 218/1452 ( 15.0%) |                                                                                           |
|                            |                                       | 2nd year         | 93/1206 ( 7.7%)   |                                                                                           |
|                            |                                       | 3rd year         | 63/1012 ( 6.2%)   |                                                                                           |
|                            |                                       | Overall          | 320/1452 ( 22.0%) |                                                                                           |
|                            | Abdominal discomfort                  | 1st year         | 3/1452 ( 0.2%)    | 160906, 161529, 200922                                                                    |
|                            |                                       | 2nd year         | 3/1206 ( 0.2%)    | 244424, 244516, 245526                                                                    |
|                            |                                       | Overall          | 6/1452 ( 0.4%)    | 160906, 161529, 200922, 244424, 244516, 245526                                            |
|                            | Abdominal distension                  | 1st year         | 10/1452 ( 0.7%)   | 140120, 141411, 160622, 161119, 240807, 241522,<br>243402, 243823, 243905, 243964         |
|                            |                                       | 2nd year         | 2/1206 ( 0.2%)    | 243402, 245526                                                                            |
|                            |                                       | Overall          | 11/1452 ( 0.8%)   | 140120, 141411, 160622, 161119, 240807, 241522,<br>243402, 243823, 243905, 243964, 245526 |

Table 14.3.1 / 10: Number of subjects with adverse events including subject identifier and year by treatment (FAS)  
 (cont.)

TREATMENT: LCS16

| Primary system organ class | YEAR OF ONSET | N (%)            | subject identifier                                                                                                                                                                                                                                                                                                                                                                                                                                                                                                                                                                                                                                                                                                                                                                                                              |
|----------------------------|---------------|------------------|---------------------------------------------------------------------------------------------------------------------------------------------------------------------------------------------------------------------------------------------------------------------------------------------------------------------------------------------------------------------------------------------------------------------------------------------------------------------------------------------------------------------------------------------------------------------------------------------------------------------------------------------------------------------------------------------------------------------------------------------------------------------------------------------------------------------------------|
| Abdominal pain             | 1st year      | 60/1452 ( 4.1%)  | 120402, 120424, 120425, 120606, 120609, 120617, 120631, 140106, 140110, 140120, 140810, 150161, 160107, 160214, 160441, 160501, 160620, 160628, 160706, 160707, 160737, 160744, 161502, 161505, 161520, 161524, 161526, 161528, 170502, 180713, 190419, 200226, 200302, 200514, 200906, 200917, 200926, 230102, 230309, 230506, 230610, 230612, 230614, 240621, 240626, 240722, 240734, 240737, 241418, 241422, 241430, 241510, 243034, 243112, 243217, 243509, 244519, 244525, 244709, 245002                                                                                                                                                                                                                                                                                                                                  |
|                            | 2nd year      | 29/1206 ( 2.4%)  | 120309, 120410, 120609, 140119, 140601, 140810, 141415, 160529, 160602, 180112, 180135, 190214, 200401, 200522, 200609, 200620, 240709, 240722, 241403, 241509, 241709, 241719, 241731, 243501, 243960, 244709, 244716, 245526, 245908                                                                                                                                                                                                                                                                                                                                                                                                                                                                                                                                                                                          |
|                            | 3rd year      | 21/1012 ( 2.1%)  | 120229, 120325, 120402, 120609, 140812, 160128, 160221, 160529, 160533, 180117, 180124, 180132, 190134, 200930, 230506, 230516, 240114, 240626, 241546, 243707, 245522                                                                                                                                                                                                                                                                                                                                                                                                                                                                                                                                                                                                                                                          |
|                            | Overall       | 101/1452 ( 7.0%) | 120229, 120309, 120325, 120402, 120410, 120424, 120425, 120606, 120609, 120617, 120631, 140106, 140110, 140119, 140120, 140601, 140810, 140812, 141415, 150161, 160107, 160128, 160214, 160221, 160441, 160501, 160529, 160533, 160602, 160620, 160628, 160706, 160707, 160737, 160744, 161502, 161505, 161520, 161524, 161526, 161528, 170502, 180112, 180117, 180124, 180132, 180135, 180713, 190134, 190214, 190419, 200226, 200302, 200401, 200514, 200522, 200609, 200620, 200906, 200917, 200926, 200930, 230102, 230309, 230506, 230516, 230610, 230612, 230614, 240114, 240621, 240626, 240709, 240722, 240734, 240737, 241403, 241418, 241422, 241430, 241509, 241510, 241546, 241709, 241719, 241731, 243034, 243112, 243217, 243501, 243509, 243707, 243960, 244519, 244525, 244709, 244716, 245002, 245522, 245526, |

Table 14.3.1 / 10: Number of subjects with adverse events including subject identifier and year by treatment (FAS)  
 (cont.)

TREATMENT: LCS16

| Primary system organ class<br>Preferred term<br>MedDRA version 14.0 | YEAR OF<br>ONSET | N (%)           | subject identifier                                                                                                                                                                                                                                                                                                                                                                                                                                                                                     |
|---------------------------------------------------------------------|------------------|-----------------|--------------------------------------------------------------------------------------------------------------------------------------------------------------------------------------------------------------------------------------------------------------------------------------------------------------------------------------------------------------------------------------------------------------------------------------------------------------------------------------------------------|
|                                                                     |                  |                 | 245908                                                                                                                                                                                                                                                                                                                                                                                                                                                                                                 |
| Abdominal pain lower                                                | 1st year         | 43/1452 ( 3.0%) | 120420, 141035, 150121, 160116, 160211, 160314, 160510, 160543, 160545, 160552, 160608, 160622, 160630, 160635, 160636, 160641, 160642, 160912, 160975, 161107, 161108, 161222, 161311, 161315, 161503, 161524, 180602, 180674, 190127, 200410, 200707, 200806, 200907, 230319, 230807, 240703, 240730, 240907, 241403, 242904, 243321, 245031, 245922                                                                                                                                                 |
|                                                                     | 2nd year         | 16/1206 ( 1.3%) | 160552, 160608, 160621, 160630, 160636, 160978, 161524, 200410, 240708, 240722, 241008, 241519, 242908, 243313, 243316, 244435                                                                                                                                                                                                                                                                                                                                                                         |
|                                                                     | 3rd year         | 9/1012 ( 0.9%)  | 160929, 160978, 161005, 190134, 190142, 240632, 240711, 241724, 243937                                                                                                                                                                                                                                                                                                                                                                                                                                 |
|                                                                     | Overall          | 61/1452 ( 4.2%) | 120420, 141035, 150121, 160116, 160211, 160314, 160510, 160543, 160545, 160552, 160608, 160621, 160622, 160630, 160635, 160636, 160641, 160642, 160912, 160929, 160975, 160978, 161005, 161107, 161108, 161222, 161311, 161315, 161503, 161524, 180602, 180674, 190127, 190134, 190142, 200410, 200707, 200806, 200907, 230319, 230807, 240632, 240703, 240708, 240711, 240722, 240730, 240907, 241008, 241403, 241519, 241724, 242904, 242908, 243313, 243316, 243321, 243937, 244435, 245031, 245922 |
| Abdominal pain upper                                                | 1st year         | 7/1452 ( 0.5%)  | 140106, 160748, 160966, 161405, 161506, 180629, 230823                                                                                                                                                                                                                                                                                                                                                                                                                                                 |
|                                                                     | 2nd year         | 2/1206 ( 0.2%)  | 161524, 245908                                                                                                                                                                                                                                                                                                                                                                                                                                                                                         |
|                                                                     | 3rd year         | 2/1012 ( 0.2%)  | 140119, 244902                                                                                                                                                                                                                                                                                                                                                                                                                                                                                         |
|                                                                     | Overall          | 11/1452 ( 0.8%) | 140106, 140119, 160748, 160966, 161405, 161506, 161524, 180629, 230823, 244902, 245908                                                                                                                                                                                                                                                                                                                                                                                                                 |
| Anal fissure                                                        | 1st year         | 1/1452 (<0.1%)  | 150126                                                                                                                                                                                                                                                                                                                                                                                                                                                                                                 |
|                                                                     | 2nd year         | 1/1206 (<0.1%)  | 241420                                                                                                                                                                                                                                                                                                                                                                                                                                                                                                 |
|                                                                     | Overall          | 2/1452 ( 0.1%)  | 150126, 241420                                                                                                                                                                                                                                                                                                                                                                                                                                                                                         |

Table 14.3.1 / 10: Number of subjects with adverse events including subject identifier and year by treatment (FAS)  
 (cont.)

TREATMENT: LCS16

| Primary system organ class<br>Preferred term<br>MedDRA version 14.0 | YEAR OF<br>ONSET | N (%)           | subject identifier                                                                                                                                                                                                                    |
|---------------------------------------------------------------------|------------------|-----------------|---------------------------------------------------------------------------------------------------------------------------------------------------------------------------------------------------------------------------------------|
| Anal pruritus                                                       | 2nd year         | 1/1206 ( <0.1%) | 241420                                                                                                                                                                                                                                |
|                                                                     | 3rd year         | 1/1012 ( <0.1%) | 241117                                                                                                                                                                                                                                |
|                                                                     | Overall          | 2/1452 ( 0.1%)  | 241117, 241420                                                                                                                                                                                                                        |
| Anal skin tags                                                      | 2nd year         | 1/1206 ( <0.1%) | 241420                                                                                                                                                                                                                                |
|                                                                     | Overall          | 1/1452 ( <0.1%) | 241420                                                                                                                                                                                                                                |
| Aphthous stomatitis                                                 | 1st year         | 1/1452 ( <0.1%) | 242312                                                                                                                                                                                                                                |
|                                                                     | Overall          | 1/1452 ( <0.1%) | 242312                                                                                                                                                                                                                                |
| Colitis                                                             | 1st year         | 2/1452 ( 0.1%)  | 190206, 190207                                                                                                                                                                                                                        |
|                                                                     | 2nd year         | 1/1206 ( <0.1%) | 190214                                                                                                                                                                                                                                |
|                                                                     | Overall          | 3/1452 ( 0.2%)  | 190206, 190207, 190214                                                                                                                                                                                                                |
| Constipation                                                        | 1st year         | 9/1452 ( 0.6%)  | 160123, 161131, 200928, 240645, 240807, 243956,<br>243977, 245922, 246103                                                                                                                                                             |
|                                                                     | 2nd year         | 6/1206 ( 0.5%)  | 141035, 200907, 200922, 241139, 243316, 244424                                                                                                                                                                                        |
|                                                                     | 3rd year         | 3/1012 ( 0.3%)  | 140805, 242321, 243964                                                                                                                                                                                                                |
|                                                                     | Overall          | 18/1452 ( 1.2%) | 140805, 141035, 160123, 161131, 200907, 200922,<br>200928, 240645, 240807, 241139, 242321, 243316,<br>243956, 243964, 243977, 244424, 245922, 246103                                                                                  |
| Dental caries                                                       | 1st year         | 1/1452 ( <0.1%) | 244916                                                                                                                                                                                                                                |
|                                                                     | 3rd year         | 2/1012 ( 0.2%)  | 242317, 242321                                                                                                                                                                                                                        |
|                                                                     | Overall          | 3/1452 ( 0.2%)  | 242317, 242321, 244916                                                                                                                                                                                                                |
| Diarrhoea                                                           | 1st year         | 16/1452 ( 1.1%) | 120606, 120609, 120612, 140810, 141025, 150147,<br>160709, 161016, 161321, 161419, 200514, 200917,<br>210110, 230811, 230815, 244606                                                                                                  |
|                                                                     | 2nd year         | 7/1206 ( 0.6%)  | 140106, 161025, 161526, 230305, 242813, 242918,<br>243976                                                                                                                                                                             |
|                                                                     | 3rd year         | 5/1012 ( 0.5%)  | 161115, 241546, 242918, 243934, 244424                                                                                                                                                                                                |
|                                                                     | Overall          | 27/1452 ( 1.9%) | 120606, 120609, 120612, 140106, 140810, 141025,<br>150147, 160709, 161016, 161025, 161115, 161321,<br>161419, 161526, 200514, 200917, 210110, 230305,<br>230811, 230815, 241546, 242813, 242918, 243934,<br>243976,<br>244424, 244606 |

Table 14.3.1 / 10: Number of subjects with adverse events including subject identifier and year by treatment (FAS)  
 (cont.)

TREATMENT: LCS16

| Primary system organ class<br>Preferred term<br>MedDRA version 14.0 | YEAR OF<br>ONSET | N (%)           | subject identifier                                                                                                             |
|---------------------------------------------------------------------|------------------|-----------------|--------------------------------------------------------------------------------------------------------------------------------|
| Dry mouth                                                           | 3rd year         | 1/1012 ( <0.1%) | 245806                                                                                                                         |
|                                                                     | Overall          | 1/1452 ( <0.1%) | 245806                                                                                                                         |
| Dyspepsia                                                           | 1st year         | 7/1452 ( 0.5%)  | 120609, 141415, 160553, 161306, 210604, 241430, 242904                                                                         |
|                                                                     | 2nd year         | 3/1206 ( 0.2%)  | 141016, 160611, 161526                                                                                                         |
|                                                                     | 3rd year         | 2/1012 ( 0.2%)  | 160603, 243707                                                                                                                 |
|                                                                     | Overall          | 12/1452 ( 0.8%) | 120609, 141016, 141415, 160553, 160603, 160611, 161306, 161526, 210604, 241430, 242904, 243707                                 |
| Dysphagia                                                           | 2nd year         | 1/1206 ( <0.1%) | 244801                                                                                                                         |
|                                                                     | Overall          | 1/1452 ( <0.1%) | 244801                                                                                                                         |
| Flatulence                                                          | 1st year         | 2/1452 ( 0.1%)  | 160748, 243964                                                                                                                 |
|                                                                     | Overall          | 2/1452 ( 0.1%)  | 160748, 243964                                                                                                                 |
| Food poisoning                                                      | 1st year         | 3/1452 ( 0.2%)  | 140805, 200529, 242317                                                                                                         |
|                                                                     | 2nd year         | 4/1206 ( 0.3%)  | 161025, 161108, 200529, 200907                                                                                                 |
|                                                                     | Overall          | 6/1452 ( 0.4%)  | 140805, 161025, 161108, 200529, 200907, 242317                                                                                 |
| Gastric ulcer                                                       | 1st year         | 1/1452 ( <0.1%) | 245707                                                                                                                         |
|                                                                     | Overall          | 1/1452 ( <0.1%) | 245707                                                                                                                         |
| Gastritis                                                           | 1st year         | 5/1452 ( 0.3%)  | 120609, 161401, 161417, 190113, 230915                                                                                         |
|                                                                     | 2nd year         | 8/1206 ( 0.7%)  | 120606, 150122, 150137, 160426, 160737, 190214, 230717, 240517                                                                 |
|                                                                     | 3rd year         | 3/1012 ( 0.3%)  | 120607, 120612, 241197                                                                                                         |
|                                                                     | Overall          | 16/1452 ( 1.1%) | 120606, 120607, 120609, 120612, 150122, 150137, 160426, 160737, 161401, 161417, 190113, 190214, 230717, 230915, 240517, 241197 |
| Gastrointestinal pain                                               | 1st year         | 1/1452 ( <0.1%) | 242811                                                                                                                         |
|                                                                     | Overall          | 1/1452 ( <0.1%) | 242811                                                                                                                         |

Table 14.3.1 / 10: Number of subjects with adverse events including subject identifier and year by treatment (FAS)  
 (cont.)

TREATMENT: LCS16

Primary system organ class

| Preferred term<br>MedDRA version 14.0 | YEAR OF<br>ONSET | N (%)           | subject identifier                                                                     |
|---------------------------------------|------------------|-----------------|----------------------------------------------------------------------------------------|
| Gastroesophageal reflux disease       | 1st year         | 6/1452 ( 0.4%)  | 161019, 190134, 241141, 241236, 241403, 244113                                         |
|                                       | 2nd year         | 3/1206 ( 0.2%)  | 141411, 240220, 243954                                                                 |
|                                       | 3rd year         | 2/1012 ( 0.2%)  | 161004, 241546                                                                         |
|                                       | Overall          | 11/1452 ( 0.8%) | 141411, 161004, 161019, 190134, 240220, 241141, 241236, 241403, 241546, 243954, 244113 |
| Gingivitis                            | 2nd year         | 1/1206 (<0.1%)  | 180708                                                                                 |
|                                       | Overall          | 1/1452 (<0.1%)  | 180708                                                                                 |
| Haematochezia                         | 2nd year         | 1/1206 (<0.1%)  | 241420                                                                                 |
|                                       | Overall          | 1/1452 (<0.1%)  | 241420                                                                                 |
| Haemorrhoids                          | 1st year         | 5/1452 ( 0.3%)  | 160438, 160642, 161321, 240802, 241031                                                 |
|                                       | 2nd year         | 3/1206 ( 0.2%)  | 161004, 230601, 241420                                                                 |
|                                       | Overall          | 8/1452 ( 0.6%)  | 160438, 160642, 161004, 161321, 230601, 240802, 241031, 241420                         |
| Hiatus hernia                         | 2nd year         | 1/1206 (<0.1%)  | 245434                                                                                 |
|                                       | Overall          | 1/1452 (<0.1%)  | 245434                                                                                 |
| Hyperchlorhydria                      | 1st year         | 1/1452 (<0.1%)  | 120612                                                                                 |
|                                       | Overall          | 1/1452 (<0.1%)  | 120612                                                                                 |
| Inflammatory bowel disease            | 3rd year         | 1/1012 (<0.1%)  | 190603                                                                                 |
|                                       | Overall          | 1/1452 (<0.1%)  | 190603                                                                                 |
| Irritable bowel syndrome              | 1st year         | 2/1452 ( 0.1%)  | 150126, 150137                                                                         |
|                                       | 2nd year         | 1/1206 (<0.1%)  | 150137                                                                                 |
|                                       | 3rd year         | 3/1012 ( 0.3%)  | 150140, 161306, 200704                                                                 |
|                                       | Overall          | 5/1452 ( 0.3%)  | 150126, 150137, 150140, 161306, 200704                                                 |
| Mouth ulceration                      | 1st year         | 2/1452 ( 0.1%)  | 120404, 244916                                                                         |
|                                       | Overall          | 2/1452 ( 0.1%)  | 120404, 244916                                                                         |



Table 14.3.1 / 10: Number of subjects with adverse events including subject identifier and year by treatment (FAS)  
 (cont.)

TREATMENT: LCS16

| Primary system organ class<br>Preferred term<br>MedDRA version 14.0 | YEAR OF<br>ONSET | N (%)           | subject identifier                                                                                                                                                                                                                                                                                                                                                                                                                                                             |
|---------------------------------------------------------------------|------------------|-----------------|--------------------------------------------------------------------------------------------------------------------------------------------------------------------------------------------------------------------------------------------------------------------------------------------------------------------------------------------------------------------------------------------------------------------------------------------------------------------------------|
| Nausea                                                              | 1st year         | 41/1452 ( 2.8%) | 120313, 120336, 140810, 141415, 160423, 160634, 160966, 161019, 170601, 180310, 200508, 200926, 210410, 230111, 240626, 240803, 241030, 241103, 241116, 241118, 241176, 241511, 241555, 242104, 243109, 243209, 243303, 243703, 243707, 243714, 243909, 243977, 244309, 244514, 244516, 244619, 244703, 244706, 244715, 246127, 246207                                                                                                                                         |
|                                                                     | 2nd year         | 8/1206 ( 0.7%)  | 140810, 160543, 240708, 240722, 240802, 241726, 243313, 245908                                                                                                                                                                                                                                                                                                                                                                                                                 |
|                                                                     | 3rd year         | 12/1012 ( 1.2%) | 120404, 240618, 240626, 241401, 241412, 241522, 241546, 242104, 242321, 242918, 244424, 245522                                                                                                                                                                                                                                                                                                                                                                                 |
|                                                                     | Overall          | 58/1452 ( 4.0%) | 120313, 120336, 120404, 140810, 141415, 160423, 160543, 160634, 160966, 161019, 170601, 180310, 200508, 200926, 210410, 230111, 240618, 240626, 240708, 240722, 240802, 240803, 241030, 241103, 241116, 241118, 241176, 241401, 241412, 241511, 241522, 241546, 241555, 241726, 242104, 242321, 242918, 243109, 243209, 243303, 243313, 243703, 243707, 243714, 243909, 243977, 244309, 244424, 244514, 244516, 244619, 244703, 244706, 244715, 245522, 245908, 246127, 246207 |
| Odynophagia                                                         | 2nd year         | 1/1206 (<0.1%)  | 244801                                                                                                                                                                                                                                                                                                                                                                                                                                                                         |
|                                                                     | Overall          | 1/1452 (<0.1%)  | 244801                                                                                                                                                                                                                                                                                                                                                                                                                                                                         |
| Oesophageal stenosis                                                | 2nd year         | 1/1206 (<0.1%)  | 140804                                                                                                                                                                                                                                                                                                                                                                                                                                                                         |
|                                                                     | Overall          | 1/1452 (<0.1%)  | 140804                                                                                                                                                                                                                                                                                                                                                                                                                                                                         |
| Oral pain                                                           | 1st year         | 1/1452 (<0.1%)  | 243205                                                                                                                                                                                                                                                                                                                                                                                                                                                                         |
|                                                                     | Overall          | 1/1452 (<0.1%)  | 243205                                                                                                                                                                                                                                                                                                                                                                                                                                                                         |
| Periodontitis                                                       | 3rd year         | 1/1012 (<0.1%)  | 161534                                                                                                                                                                                                                                                                                                                                                                                                                                                                         |
|                                                                     | Overall          | 1/1452 (<0.1%)  | 161534                                                                                                                                                                                                                                                                                                                                                                                                                                                                         |
| Proctalgia                                                          | 2nd year         | 1/1206 (<0.1%)  | 241420                                                                                                                                                                                                                                                                                                                                                                                                                                                                         |
|                                                                     | Overall          | 1/1452 (<0.1%)  | 241420                                                                                                                                                                                                                                                                                                                                                                                                                                                                         |

Table 14.3.1 / 10: Number of subjects with adverse events including subject identifier and year by treatment (FAS)  
 (cont.)

TREATMENT: LCS16

| Primary system organ class | YEAR OF ONSET | N (%)           | subject identifier                                                                                                                                                                                             |
|----------------------------|---------------|-----------------|----------------------------------------------------------------------------------------------------------------------------------------------------------------------------------------------------------------|
| Rectal haemorrhage         | 1st year      | 2/1452 ( 0.1%)  | 244709, 245905                                                                                                                                                                                                 |
|                            | 2nd year      | 1/1206 ( <0.1%) | 241420                                                                                                                                                                                                         |
|                            | Overall       | 3/1452 ( 0.2%)  | 241420, 244709, 245905                                                                                                                                                                                         |
| Reflux oesophagitis        | 1st year      | 1/1452 ( <0.1%) | 161123                                                                                                                                                                                                         |
|                            | 2nd year      | 1/1206 ( <0.1%) | 161123                                                                                                                                                                                                         |
|                            | Overall       | 1/1452 ( <0.1%) | 161123                                                                                                                                                                                                         |
| Salivary gland calculus    | 1st year      | 1/1452 ( <0.1%) | 243975                                                                                                                                                                                                         |
|                            | Overall       | 1/1452 ( <0.1%) | 243975                                                                                                                                                                                                         |
| Tooth disorder             | 2nd year      | 1/1206 ( <0.1%) | 160107                                                                                                                                                                                                         |
|                            | Overall       | 1/1452 ( <0.1%) | 160107                                                                                                                                                                                                         |
| Toothache                  | 1st year      | 15/1452 ( 1.0%) | 120101, 120102, 120606, 120615, 120627, 160115, 160314, 160632, 180678, 210123, 241194, 241510, 243966, 244519, 244916                                                                                         |
|                            | 2nd year      | 9/1206 ( 0.7%)  | 120402, 120606, 150103, 160115, 160703, 180730, 241301, 241801, 244519                                                                                                                                         |
|                            | 3rd year      | 5/1012 ( 0.5%)  | 120603, 160602, 160907, 161211, 244435                                                                                                                                                                         |
|                            | Overall       | 26/1452 ( 1.8%) | 120101, 120102, 120402, 120603, 120606, 120615, 120627, 150103, 160115, 160314, 160602, 160632, 160703, 160907, 161211, 180678, 180730, 210123, 241194, 241301, 241510, 241801, 243966, 244435, 244519, 244916 |
| Umbilical hernia           | 3rd year      | 1/1012 ( <0.1%) | 120404                                                                                                                                                                                                         |
|                            | Overall       | 1/1452 ( <0.1%) | 120404                                                                                                                                                                                                         |
| Vomiting                   | 1st year      | 13/1452 ( 0.9%) | 140810, 160546, 161315, 230203, 230220, 240626, 240706, 243303, 243406, 244619, 244715, 246127, 246207                                                                                                         |
|                            | 2nd year      | 6/1206 ( 0.5%)  | 141415, 230305, 240708, 240722, 241731, 245507                                                                                                                                                                 |
|                            | 3rd year      | 5/1012 ( 0.5%)  | 242918, 243223, 243707, 243934, 245522                                                                                                                                                                         |
|                            | Overall       | 24/1452 ( 1.7%) | 140810, 141415, 160546, 161315, 230203, 230220, 230305, 240626, 240706, 240708, 240722, 241731, 242918, 243223, 243303, 243406, 243707, 243934, 244619, 244715, 245507, 245522, 246127, 246207                 |

Table 14.3.1 / 10: Number of subjects with adverse events including subject identifier and year by treatment (FAS)  
 (cont.)

TREATMENT: LCS16

Primary system organ class

| Preferred term<br>MedDRA version 14.0                | YEAR OF<br>ONSET | N (%)            | subject identifier                                     |
|------------------------------------------------------|------------------|------------------|--------------------------------------------------------|
| General disorders and administration site conditions | 1st year         | 72/1452 ( 5.0%)  |                                                        |
|                                                      | 2nd year         | 30/1206 ( 2.5%)  |                                                        |
|                                                      | 3rd year         | 20/1012 ( 2.0%)  |                                                        |
|                                                      | Overall          | 119/1452 ( 8.2%) |                                                        |
| Asthenia                                             | 1st year         | 1/1452 (<0.1%)   | 120410                                                 |
|                                                      | Overall          | 1/1452 (<0.1%)   | 120410                                                 |
| Axillary pain                                        | 2nd year         | 1/1206 (<0.1%)   | 243205                                                 |
|                                                      | Overall          | 1/1452 (<0.1%)   | 243205                                                 |
| Chest pain                                           | 1st year         | 2/1452 ( 0.1%)   | 241236, 242811                                         |
|                                                      | 2nd year         | 1/1206 (<0.1%)   | 120311                                                 |
|                                                      | 3rd year         | 4/1012 ( 0.4%)   | 140112, 160919, 241412, 244805                         |
|                                                      | Overall          | 7/1452 ( 0.5%)   | 120311, 140112, 160919, 241236, 241412, 242811, 244805 |
| Chills                                               | 1st year         | 2/1452 ( 0.1%)   | 140508, 245511                                         |
|                                                      | Overall          | 2/1452 ( 0.1%)   | 140508, 245511                                         |
| Cyst                                                 | 3rd year         | 1/1012 (<0.1%)   | 245930                                                 |
|                                                      | Overall          | 1/1452 (<0.1%)   | 245930                                                 |
| Device dislocation                                   | 1st year         | 3/1452 ( 0.2%)   | 243108, 244905, 245404                                 |
|                                                      | 2nd year         | 1/1206 (<0.1%)   | 160978                                                 |
|                                                      | 3rd year         | 1/1012 (<0.1%)   | 243918                                                 |
|                                                      | Overall          | 5/1452 ( 0.3%)   | 160978, 243108, 243918, 244905, 245404                 |

Table 14.3.1 / 10: Number of subjects with adverse events including subject identifier and year by treatment (FAS)  
(cont.)

TREATMENT: LCS16

| Primary system organ class<br>Preferred term<br>MedDRA version 14.0 | YEAR OF<br>ONSET | N (%)           | subject identifier                                                                                                                                                                                                                                                                                     |
|---------------------------------------------------------------------|------------------|-----------------|--------------------------------------------------------------------------------------------------------------------------------------------------------------------------------------------------------------------------------------------------------------------------------------------------------|
| Device expulsion                                                    | 1st year         | 23/1452 ( 1.6%) | 120319, 160318, 160621, 170103, 180219, 180634, 180653, 180656, 180679, 180682, 190627, 240354, 240822, 240901, 241195, 241540, 241732, 242507, 244114, 244309, 244715, 244933, 245406                                                                                                                 |
|                                                                     | 2nd year         | 7/1206 ( 0.6%)  | 180121, 180134, 180226, 240133, 243034, 243208, 243936                                                                                                                                                                                                                                                 |
|                                                                     | 3rd year         | 7/1012 ( 0.7%)  | 120318, 170303, 243101, 243703, 243954, 245408, 246120                                                                                                                                                                                                                                                 |
|                                                                     | Overall          | 37/1452 ( 2.5%) | 120318, 120319, 160318, 160621, 170103, 170303, 180121, 180134, 180219, 180226, 180634, 180653, 180656, 180679, 180682, 190627, 240133, 240354, 240822, 240901, 241195, 241540, 241732, 242507, 243034, 243101, 243208, 243703, 243936, 243954, 244114, 244309, 244715, 244933, 245406, 245408, 246120 |
| Discomfort                                                          | 2nd year         | 1/1206 ( <0.1%) | 242704                                                                                                                                                                                                                                                                                                 |
|                                                                     | Overall          | 1/1452 ( <0.1%) | 242704                                                                                                                                                                                                                                                                                                 |
| Fatigue                                                             | 1st year         | 19/1452 ( 1.3%) | 140201, 140805, 140810, 140812, 140818, 160561, 160966, 180664, 200508, 200906, 230211, 230514, 230516, 240330, 241030, 241418, 241420, 244516, 245035                                                                                                                                                 |
|                                                                     | 2nd year         | 6/1206 ( 0.5%)  | 141007, 180641, 230309, 243215, 243819, 245905                                                                                                                                                                                                                                                         |
|                                                                     | 3rd year         | 2/1012 ( 0.2%)  | 241403, 245522                                                                                                                                                                                                                                                                                         |
|                                                                     | Overall          | 27/1452 ( 1.9%) | 140201, 140805, 140810, 140812, 140818, 141007, 160561, 160966, 180641, 180664, 200508, 200906, 230211, 230309, 230514, 230516, 240330, 241030, 241403, 241418, 241420, 243215, 243819, 244516, 245035, 245522, 245905                                                                                 |
| Feeling cold                                                        | 1st year         | 1/1452 ( <0.1%) | 242915                                                                                                                                                                                                                                                                                                 |
|                                                                     | 2nd year         | 1/1206 ( <0.1%) | 240722                                                                                                                                                                                                                                                                                                 |
|                                                                     | Overall          | 2/1452 ( 0.1%)  | 240722, 242915                                                                                                                                                                                                                                                                                         |
| Feeling hot                                                         | 1st year         | 1/1452 ( <0.1%) | 230505                                                                                                                                                                                                                                                                                                 |
|                                                                     | Overall          | 1/1452 ( <0.1%) | 230505                                                                                                                                                                                                                                                                                                 |

Table 14.3.1 / 10: Number of subjects with adverse events including subject identifier and year by treatment (FAS)  
 (cont.)

TREATMENT: LCS16

| Primary system organ class<br>Preferred term<br>MedDRA version 14.0 | YEAR OF<br>ONSET | N (%)           | subject identifier                             |
|---------------------------------------------------------------------|------------------|-----------------|------------------------------------------------|
| Hunger                                                              | 2nd year         | 1/1206 ( <0.1%) | 243402                                         |
|                                                                     | Overall          | 1/1452 ( <0.1%) | 243402                                         |
| Inflammation                                                        | 3rd year         | 1/1012 ( <0.1%) | 160755                                         |
|                                                                     | Overall          | 1/1452 ( <0.1%) | 160755                                         |
| Influenza like illness                                              | 2nd year         | 1/1206 ( <0.1%) | 242501                                         |
|                                                                     | Overall          | 1/1452 ( <0.1%) | 242501                                         |
| Injury associated with device                                       | 1st year         | 1/1452 ( <0.1%) | 231110                                         |
|                                                                     | Overall          | 1/1452 ( <0.1%) | 231110                                         |
| Irritability                                                        | 1st year         | 4/1452 ( 0.3%)  | 140112, 140818, 160513, 230610                 |
|                                                                     | 2nd year         | 1/1206 ( <0.1%) | 141411                                         |
|                                                                     | 3rd year         | 1/1012 ( <0.1%) | 240840                                         |
|                                                                     | Overall          | 6/1452 ( 0.4%)  | 140112, 140818, 141411, 160513, 230610, 240840 |
| Localised oedema                                                    | 1st year         | 1/1452 ( <0.1%) | 161524                                         |
|                                                                     | 2nd year         | 1/1206 ( <0.1%) | 161524                                         |
|                                                                     | Overall          | 1/1452 ( <0.1%) | 161524                                         |
| Malaise                                                             | 1st year         | 1/1452 ( <0.1%) | 190214                                         |
|                                                                     | Overall          | 1/1452 ( <0.1%) | 190214                                         |
| Oedema                                                              | 1st year         | 1/1452 ( <0.1%) | 160802                                         |
|                                                                     | Overall          | 1/1452 ( <0.1%) | 160802                                         |
| Oedema peripheral                                                   | 1st year         | 4/1452 ( 0.3%)  | 160101, 241901, 242702, 243407                 |
|                                                                     | 2nd year         | 1/1206 ( <0.1%) | 160219                                         |
|                                                                     | 3rd year         | 1/1012 ( <0.1%) | 200704                                         |
|                                                                     | Overall          | 6/1452 ( 0.4%)  | 160101, 160219, 200704, 241901, 242702, 243407 |
| Pain                                                                | 1st year         | 3/1452 ( 0.2%)  | 120410, 241535, 245511                         |
|                                                                     | 2nd year         | 1/1206 ( <0.1%) | 244424                                         |
|                                                                     | 3rd year         | 1/1012 ( <0.1%) | 170303                                         |
|                                                                     | Overall          | 5/1452 ( 0.3%)  | 120410, 170303, 241535, 244424, 245511         |

Table 14.3.1 / 10: Number of subjects with adverse events including subject identifier and year by treatment (FAS)  
 (cont.)

TREATMENT: LCS16

| Primary system organ class | YEAR OF ONSET | N (%)           | subject identifier                                                                                                             |
|----------------------------|---------------|-----------------|--------------------------------------------------------------------------------------------------------------------------------|
| Preferred term             |               |                 |                                                                                                                                |
| MedDRA version 14.0        |               |                 |                                                                                                                                |
| Pyrexia                    | 1st year      | 10/1452 ( 0.7%) | 140225, 160221, 161526, 161535, 210405, 230220, 230222, 241107, 241418, 245511                                                 |
|                            | 2nd year      | 5/1206 ( 0.4%)  | 160126, 160629, 200707, 210123, 230811                                                                                         |
|                            | 3rd year      | 2/1012 ( 0.2%)  | 210103, 210123                                                                                                                 |
|                            | Overall       | 16/1452 ( 1.1%) | 140225, 160126, 160221, 160629, 161526, 161535, 200707, 210103, 210123, 210405, 230220, 230222, 230811, 241107, 241418, 245511 |
| Vaccination site pain      | 2nd year      | 1/1206 ( <0.1%) | 230704                                                                                                                         |
|                            | Overall       | 1/1452 ( <0.1%) | 230704                                                                                                                         |
| Hepatobiliary disorders    | 1st year      | 6/1452 ( 0.4%)  |                                                                                                                                |
|                            | 2nd year      | 3/1206 ( 0.2%)  |                                                                                                                                |
|                            | 3rd year      | 2/1012 ( 0.2%)  |                                                                                                                                |
|                            | Overall       | 11/1452 ( 0.8%) |                                                                                                                                |
| Biliary colic              | 1st year      | 2/1452 ( 0.1%)  | 120425, 243303                                                                                                                 |
|                            | Overall       | 2/1452 ( 0.1%)  | 120425, 243303                                                                                                                 |
| Biliary dyskinesia         | 2nd year      | 1/1206 ( <0.1%) | 243020                                                                                                                         |
|                            | Overall       | 1/1452 ( <0.1%) | 243020                                                                                                                         |
| Cholecystitis              | 2nd year      | 1/1206 ( <0.1%) | 243011                                                                                                                         |
|                            | 3rd year      | 1/1012 ( <0.1%) | 243707                                                                                                                         |
|                            | Overall       | 2/1452 ( 0.1%)  | 243011, 243707                                                                                                                 |
| Cholelithiasis             | 1st year      | 1/1452 ( <0.1%) | 245707                                                                                                                         |
|                            | 2nd year      | 1/1206 ( <0.1%) | 241726                                                                                                                         |
|                            | 3rd year      | 2/1012 ( 0.2%)  | 160221, 243707                                                                                                                 |
|                            | Overall       | 4/1452 ( 0.3%)  | 160221, 241726, 243707, 245707                                                                                                 |
| Gallbladder pain           | 1st year      | 1/1452 ( <0.1%) | 241901                                                                                                                         |
|                            | Overall       | 1/1452 ( <0.1%) | 241901                                                                                                                         |
| Hepatic steatosis          | 1st year      | 1/1452 ( <0.1%) | 245517                                                                                                                         |
|                            | Overall       | 1/1452 ( <0.1%) | 245517                                                                                                                         |

Table 14.3.1 / 10: Number of subjects with adverse events including subject identifier and year by treatment (FAS)  
 (cont.)

TREATMENT: LCS16

| Primary system organ class | YEAR OF ONSET | N (%)           | subject identifier                                                                     |
|----------------------------|---------------|-----------------|----------------------------------------------------------------------------------------|
| Preferred term             |               |                 |                                                                                        |
| MedDRA version 14.0        |               |                 |                                                                                        |
| Hyperbilirubinaemia        | 1st year      | 1/1452 ( <0.1%) | 200707                                                                                 |
|                            | Overall       | 1/1452 ( <0.1%) | 200707                                                                                 |
| Immune system disorders    | 1st year      | 37/1452 ( 2.5%) |                                                                                        |
|                            | 2nd year      | 22/1206 ( 1.8%) |                                                                                        |
|                            | 3rd year      | 21/1012 ( 2.1%) |                                                                                        |
|                            | Overall       | 66/1452 ( 4.5%) |                                                                                        |
| Allergy to animal          | 1st year      | 2/1452 ( 0.1%)  | 160324, 161306                                                                         |
|                            | Overall       | 2/1452 ( 0.1%)  | 160324, 161306                                                                         |
| Allergy to arthropod bite  | 3rd year      | 1/1012 ( <0.1%) | 240517                                                                                 |
|                            | Overall       | 1/1452 ( <0.1%) | 240517                                                                                 |
| Allergy to arthropod sting | 3rd year      | 1/1012 ( <0.1%) | 161311                                                                                 |
|                            | Overall       | 1/1452 ( <0.1%) | 161311                                                                                 |
| Anaphylactic reaction      | 3rd year      | 1/1012 ( <0.1%) | 244706                                                                                 |
|                            | Overall       | 1/1452 ( <0.1%) | 244706                                                                                 |
| Drug hypersensitivity      | 1st year      | 4/1452 ( 0.3%)  | 140205, 160621, 200610, 243319                                                         |
|                            | 3rd year      | 2/1012 ( 0.2%)  | 140812, 240517                                                                         |
|                            | Overall       | 6/1452 ( 0.4%)  | 140205, 140812, 160621, 200610, 240517, 243319                                         |
| Food allergy               | 1st year      | 1/1452 ( <0.1%) | 241603                                                                                 |
|                            | Overall       | 1/1452 ( <0.1%) | 241603                                                                                 |
| Hypersensitivity           | 1st year      | 6/1452 ( 0.4%)  | 120612, 120618, 161116, 161211, 200231, 210413                                         |
|                            | 2nd year      | 5/1206 ( 0.4%)  | 120612, 160747, 161204, 240303, 245922                                                 |
|                            | 3rd year      | 1/1012 ( <0.1%) | 120603                                                                                 |
|                            | Overall       | 11/1452 ( 0.8%) | 120603, 120612, 120618, 160747, 161116, 161204, 161211, 200231, 210413, 240303, 245922 |

Table 14.3.1 / 10: Number of subjects with adverse events including subject identifier and year by treatment (FAS)  
 (cont.)

TREATMENT: LCS16

| Primary system organ class  | YEAR OF ONSET | N (%)             | subject identifier                                                                                                                                                                                                                                                                                                                                             |
|-----------------------------|---------------|-------------------|----------------------------------------------------------------------------------------------------------------------------------------------------------------------------------------------------------------------------------------------------------------------------------------------------------------------------------------------------------------|
| Preferred term              |               |                   |                                                                                                                                                                                                                                                                                                                                                                |
| MedDRA version 14.0         |               |                   |                                                                                                                                                                                                                                                                                                                                                                |
| Seasonal allergy            | 1st year      | 24/1452 ( 1.7%)   | 140805, 160115, 160426, 160428, 160641, 160723, 160728, 160744, 160759, 160802, 160919, 160921, 161004, 161503, 161524, 161536, 200712, 230222, 230309, 241145, 241809, 243604, 244905, 245704                                                                                                                                                                 |
|                             | 2nd year      | 17/1206 ( 1.4%)   | 141111, 160115, 160428, 160429, 160642, 160744, 160759, 160919, 161004, 161432, 161502, 230506, 240133, 241420, 242918, 244424, 244902                                                                                                                                                                                                                         |
|                             | 3rd year      | 16/1012 ( 1.6%)   | 160214, 160314, 160428, 160735, 160921, 161004, 161417, 161432, 161524, 200712, 230506, 240620, 241177, 242501, 245504, 246218                                                                                                                                                                                                                                 |
|                             | Overall       | 44/1452 ( 3.0%)   | 140805, 141111, 160115, 160214, 160314, 160426, 160428, 160429, 160641, 160642, 160723, 160728, 160735, 160744, 160759, 160802, 160919, 160921, 161004, 161417, 161432, 161502, 161503, 161524, 161536, 200712, 230222, 230309, 230506, 240133, 240620, 241145, 241177, 241420, 241809, 242501, 242918, 243604, 244424, 244902, 244905, 245504, 245704, 246218 |
| Infections and infestations | 1st year      | 529/1452 ( 36.4%) |                                                                                                                                                                                                                                                                                                                                                                |
|                             | 2nd year      | 335/1206 ( 27.8%) |                                                                                                                                                                                                                                                                                                                                                                |
|                             | 3rd year      | 259/1012 ( 25.6%) |                                                                                                                                                                                                                                                                                                                                                                |
|                             | Overall       | 736/1452 ( 50.7%) |                                                                                                                                                                                                                                                                                                                                                                |
| Abscess limb                | 1st year      | 1/1452 (<0.1%)    | 242912                                                                                                                                                                                                                                                                                                                                                         |
|                             | Overall       | 1/1452 (<0.1%)    | 242912                                                                                                                                                                                                                                                                                                                                                         |
| Acute sinusitis             | 2nd year      | 2/1206 ( 0.2%)    | 161209, 240523                                                                                                                                                                                                                                                                                                                                                 |
|                             | 3rd year      | 1/1012 (<0.1%)    | 161118                                                                                                                                                                                                                                                                                                                                                         |
|                             | Overall       | 3/1452 ( 0.2%)    | 161118, 161209, 240523                                                                                                                                                                                                                                                                                                                                         |
| Acute tonsillitis           | 1st year      | 1/1452 (<0.1%)    | 160919                                                                                                                                                                                                                                                                                                                                                         |
|                             | 2nd year      | 2/1206 ( 0.2%)    | 150140, 200902                                                                                                                                                                                                                                                                                                                                                 |
|                             | 3rd year      | 2/1012 ( 0.2%)    | 160120, 160907                                                                                                                                                                                                                                                                                                                                                 |
|                             | Overall       | 5/1452 ( 0.3%)    | 150140, 160120, 160907, 160919, 200902                                                                                                                                                                                                                                                                                                                         |



Table 14.3.1 / 10: Number of subjects with adverse events including subject identifier and year by treatment (FAS)  
 (cont.)

TREATMENT: LCS16

| Primary system organ class<br>Preferred term<br>MedDRA version 14.0 | YEAR OF<br>ONSET | N (%)           | subject identifier                                                                                                                                                                                                                                                                                             |
|---------------------------------------------------------------------|------------------|-----------------|----------------------------------------------------------------------------------------------------------------------------------------------------------------------------------------------------------------------------------------------------------------------------------------------------------------|
| Anogenital warts                                                    | 1st year         | 4/1452 ( 0.3%)  | 120314, 140101, 200401, 230918                                                                                                                                                                                                                                                                                 |
|                                                                     | 2nd year         | 3/1206 ( 0.2%)  | 210103, 230416, 245517                                                                                                                                                                                                                                                                                         |
|                                                                     | 3rd year         | 3/1012 ( 0.3%)  | 120334, 160210, 160748                                                                                                                                                                                                                                                                                         |
|                                                                     | Overall          | 10/1452 ( 0.7%) | 120314, 120334, 140101, 160210, 160748, 200401, 210103, 230416, 230918, 245517                                                                                                                                                                                                                                 |
| Appendicitis                                                        | 1st year         | 2/1452 ( 0.1%)  | 190202, 244433                                                                                                                                                                                                                                                                                                 |
|                                                                     | 2nd year         | 3/1206 ( 0.2%)  | 141415, 200401, 243205                                                                                                                                                                                                                                                                                         |
|                                                                     | 3rd year         | 2/1012 ( 0.2%)  | 240905, 245805                                                                                                                                                                                                                                                                                                 |
|                                                                     | Overall          | 7/1452 ( 0.5%)  | 141415, 190202, 200401, 240905, 243205, 244433, 245805                                                                                                                                                                                                                                                         |
| Blastocystis infection                                              | 3rd year         | 1/1012 ( <0.1%) | 141035                                                                                                                                                                                                                                                                                                         |
|                                                                     | Overall          | 1/1452 ( <0.1%) | 141035                                                                                                                                                                                                                                                                                                         |
| Body tinea                                                          | 1st year         | 2/1452 ( 0.1%)  | 242503, 244902                                                                                                                                                                                                                                                                                                 |
|                                                                     | Overall          | 2/1452 ( 0.1%)  | 242503, 244902                                                                                                                                                                                                                                                                                                 |
| Bronchitis                                                          | 1st year         | 21/1452 ( 1.4%) | 120101, 120334, 140610, 140920, 150139, 160202, 160332, 160532, 160608, 160972, 161016, 161306, 161528, 170703, 200920, 230516, 240320, 241157, 241524, 243228, 245918                                                                                                                                         |
|                                                                     | 2nd year         | 15/1206 ( 1.2%) | 140804, 150204, 160533, 160549, 160603, 160608, 160735, 161016, 161115, 161118, 230211, 241420, 241802, 244409, 244704                                                                                                                                                                                         |
|                                                                     | 3rd year         | 5/1012 ( 0.5%)  | 120334, 160324, 160748, 160921, 161529                                                                                                                                                                                                                                                                         |
|                                                                     | Overall          | 38/1452 ( 2.6%) | 120101, 120334, 140610, 140804, 140920, 150139, 150204, 160202, 160324, 160332, 160532, 160533, 160549, 160603, 160608, 160735, 160748, 160921, 160972, 161016, 161115, 161118, 161306, 161528, 161529, 170703, 200920, 230211, 230516, 240320, 241157, 241420, 241524, 241802, 243228, 244409, 244704, 245918 |
| Campylobacter intestinal infection                                  | 1st year         | 1/1452 ( <0.1%) | 230215                                                                                                                                                                                                                                                                                                         |
|                                                                     | Overall          | 1/1452 ( <0.1%) | 230215                                                                                                                                                                                                                                                                                                         |

Table 14.3.1 / 10: Number of subjects with adverse events including subject identifier and year by treatment (FAS)  
 (cont.)

TREATMENT: LCS16

| Primary system organ class<br>Preferred term<br>MedDRA version 14.0 | YEAR OF<br>ONSET | N (%)           | subject identifier                                                                                                     |
|---------------------------------------------------------------------|------------------|-----------------|------------------------------------------------------------------------------------------------------------------------|
| Candidiasis                                                         | 1st year         | 5/1452 ( 0.3%)  | 160126, 190103, 200605, 230717, 244305                                                                                 |
|                                                                     | 2nd year         | 2/1206 ( 0.2%)  | 161526, 246140                                                                                                         |
|                                                                     | 3rd year         | 2/1012 ( 0.2%)  | 190212, 200922                                                                                                         |
|                                                                     | Overall          | 9/1452 ( 0.6%)  | 160126, 161526, 190103, 190212, 200605, 200922, 230717, 244305, 246140                                                 |
| Carbuncle                                                           | 1st year         | 1/1452 ( <0.1%) | 160919                                                                                                                 |
|                                                                     | Overall          | 1/1452 ( <0.1%) | 160919                                                                                                                 |
| Cellulitis                                                          | 1st year         | 3/1452 ( 0.2%)  | 240616, 242912, 243027                                                                                                 |
|                                                                     | 2nd year         | 1/1206 ( <0.1%) | 240616                                                                                                                 |
|                                                                     | 3rd year         | 1/1012 ( <0.1%) | 120627                                                                                                                 |
|                                                                     | Overall          | 4/1452 ( 0.3%)  | 120627, 240616, 242912, 243027                                                                                         |
| Cervicitis                                                          | 1st year         | 11/1452 ( 0.8%) | 140112, 140805, 160503, 190103, 190108, 190404, 190416, 230315, 243001, 244802, 245429                                 |
|                                                                     | 2nd year         | 2/1206 ( 0.2%)  | 120408, 140818                                                                                                         |
|                                                                     | 3rd year         | 3/1012 ( 0.3%)  | 161118, 190103, 190414                                                                                                 |
|                                                                     | Overall          | 15/1452 ( 1.0%) | 120408, 140112, 140805, 140818, 160503, 161118, 190103, 190108, 190404, 190414, 190416, 230315, 243001, 244802, 245429 |
| Chlamydial cervicitis                                               | 1st year         | 1/1452 ( <0.1%) | 243909                                                                                                                 |
|                                                                     | 2nd year         | 3/1206 ( 0.2%)  | 231117, 240632, 241139                                                                                                 |
|                                                                     | 3rd year         | 2/1012 ( 0.2%)  | 161123, 241219                                                                                                         |
|                                                                     | Overall          | 6/1452 ( 0.4%)  | 161123, 231117, 240632, 241139, 241219, 243909                                                                         |
| Chlamydial infection                                                | 1st year         | 2/1452 ( 0.1%)  | 161008, 230513                                                                                                         |
|                                                                     | 2nd year         | 1/1206 ( <0.1%) | 210206                                                                                                                 |
|                                                                     | 3rd year         | 1/1012 ( <0.1%) | 243967                                                                                                                 |
|                                                                     | Overall          | 4/1452 ( 0.3%)  | 161008, 210206, 230513, 243967                                                                                         |
| Chronic tonsillitis                                                 | 3rd year         | 1/1012 ( <0.1%) | 160126                                                                                                                 |
|                                                                     | Overall          | 1/1452 ( <0.1%) | 160126                                                                                                                 |
| Conjunctivitis bacterial                                            | 1st year         | 1/1452 ( <0.1%) | 160969                                                                                                                 |
|                                                                     | 2nd year         | 1/1206 ( <0.1%) | 160602                                                                                                                 |
|                                                                     | Overall          | 2/1452 ( 0.1%)  | 160602, 160969                                                                                                         |

Table 14.3.1 / 10: Number of subjects with adverse events including subject identifier and year by treatment (FAS)  
 (cont.)

TREATMENT: LCS16

| Primary system organ class<br>Preferred term<br>MedDRA version 14.0 | YEAR OF<br>ONSET | N (%)           | subject identifier                                                                                                                                                                                             |
|---------------------------------------------------------------------|------------------|-----------------|----------------------------------------------------------------------------------------------------------------------------------------------------------------------------------------------------------------|
| Conjunctivitis viral                                                | 1st year         | 1/1452 ( <0.1%) | 120607                                                                                                                                                                                                         |
|                                                                     | Overall          | 1/1452 ( <0.1%) | 120607                                                                                                                                                                                                         |
| Coxsackie viral infection                                           | 1st year         | 1/1452 ( <0.1%) | 161529                                                                                                                                                                                                         |
|                                                                     | Overall          | 1/1452 ( <0.1%) | 161529                                                                                                                                                                                                         |
| Cystitis                                                            | 1st year         | 13/1452 ( 0.9%) | 140804, 160760, 161306, 180112, 180720, 200103, 200110, 200212, 200514, 200610, 200711, 243208, 245030                                                                                                         |
|                                                                     | 2nd year         | 13/1206 ( 1.1%) | 120303, 140812, 141411, 160602, 160752, 160760, 180112, 180314, 200110, 200513, 241117, 241121, 241141                                                                                                         |
|                                                                     | 3rd year         | 6/1012 ( 0.6%)  | 140804, 160602, 160611, 200920, 241117, 241705                                                                                                                                                                 |
|                                                                     | Overall          | 26/1452 ( 1.8%) | 120303, 140804, 140812, 141411, 160602, 160611, 160752, 160760, 161306, 180112, 180314, 180720, 200103, 200110, 200212, 200513, 200514, 200610, 200711, 200920, 241117, 241121, 241141, 241705, 243208, 245030 |
| Diarrhoea infectious                                                | 1st year         | 1/1452 ( <0.1%) | 244521                                                                                                                                                                                                         |
|                                                                     | 3rd year         | 1/1012 ( <0.1%) | 140512                                                                                                                                                                                                         |
|                                                                     | Overall          | 2/1452 ( 0.1%)  | 140512, 244521                                                                                                                                                                                                 |
| Diverticulitis                                                      | 2nd year         | 1/1206 ( <0.1%) | 240133                                                                                                                                                                                                         |
|                                                                     | Overall          | 1/1452 ( <0.1%) | 240133                                                                                                                                                                                                         |
| Ear infection                                                       | 1st year         | 7/1452 ( 0.5%)  | 141020, 141401, 150126, 160123, 161528, 170607, 243960                                                                                                                                                         |
|                                                                     | 2nd year         | 5/1206 ( 0.4%)  | 141020, 161118, 161204, 161306, 245806                                                                                                                                                                         |
|                                                                     | 3rd year         | 3/1012 ( 0.3%)  | 141020, 161524, 200605                                                                                                                                                                                         |
|                                                                     | Overall          | 13/1452 ( 0.9%) | 141020, 141401, 150126, 160123, 161118, 161204, 161306, 161524, 161528, 170607, 200605, 243960, 245806                                                                                                         |

Table 14.3.1 / 10: Number of subjects with adverse events including subject identifier and year by treatment (FAS)  
 (cont.)

TREATMENT: LCS16

| Primary system organ class<br>Preferred term<br>MedDRA version 14.0 | YEAR OF<br>ONSET | N (%)           | subject identifier                                                                        |
|---------------------------------------------------------------------|------------------|-----------------|-------------------------------------------------------------------------------------------|
| Endometritis                                                        | 1st year         | 9/1452 ( 0.6%)  | 160504, 160718, 160727, 160748, 180661, 180678,<br>230909, 230916, 241726                 |
|                                                                     | 2nd year         | 3/1206 ( 0.2%)  | 160635, 160748, 240626                                                                    |
|                                                                     | Overall          | 11/1452 ( 0.8%) | 160504, 160635, 160718, 160727, 160748, 180661,<br>180678, 230909, 230916, 240626, 241726 |
| Enterobiasis                                                        | 1st year         | 1/1452 (<0.1%)  | 161211                                                                                    |
|                                                                     | Overall          | 1/1452 (<0.1%)  | 161211                                                                                    |
| Epstein-Barr virus infection                                        | 1st year         | 1/1452 (<0.1%)  | 140504                                                                                    |
|                                                                     | Overall          | 1/1452 (<0.1%)  | 140504                                                                                    |
| Escherichia urinary tract infection                                 | 1st year         | 1/1452 (<0.1%)  | 170411                                                                                    |
|                                                                     | Overall          | 1/1452 (<0.1%)  | 170411                                                                                    |
| Eye infection                                                       | 3rd year         | 1/1012 (<0.1%)  | 160526                                                                                    |
|                                                                     | Overall          | 1/1452 (<0.1%)  | 160526                                                                                    |
| Folliculitis                                                        | 1st year         | 2/1452 ( 0.1%)  | 244606, 244801                                                                            |
|                                                                     | 3rd year         | 4/1012 ( 0.4%)  | 140103, 161101, 161105, 200605                                                            |
|                                                                     | Overall          | 6/1452 ( 0.4%)  | 140103, 161101, 161105, 200605, 244606, 244801                                            |
| Fungal infection                                                    | 1st year         | 6/1452 ( 0.4%)  | 160533, 170602, 170607, 190129, 243504, 243518                                            |
|                                                                     | 2nd year         | 2/1206 ( 0.2%)  | 160533, 241714                                                                            |
|                                                                     | 3rd year         | 1/1012 (<0.1%)  | 240605                                                                                    |
|                                                                     | Overall          | 8/1452 ( 0.6%)  | 160533, 170602, 170607, 190129, 240605, 241714,<br>243504, 243518                         |
| Fungal skin infection                                               | 2nd year         | 1/1206 (<0.1%)  | 200520                                                                                    |
|                                                                     | Overall          | 1/1452 (<0.1%)  | 200520                                                                                    |
| Furuncle                                                            | 1st year         | 1/1452 (<0.1%)  | 244614                                                                                    |
|                                                                     | Overall          | 1/1452 (<0.1%)  | 244614                                                                                    |
| Gastritis bacterial                                                 | 1st year         | 1/1452 (<0.1%)  | 241211                                                                                    |
|                                                                     | Overall          | 1/1452 (<0.1%)  | 241211                                                                                    |

Table 14.3.1 / 10: Number of subjects with adverse events including subject identifier and year by treatment (FAS)  
 (cont.)

TREATMENT: LCS16

| Primary system organ class<br>Preferred term<br>MedDRA version 14.0 | YEAR OF<br>ONSET | N (%)           | subject identifier                                                                                                                                                                                                                     |
|---------------------------------------------------------------------|------------------|-----------------|----------------------------------------------------------------------------------------------------------------------------------------------------------------------------------------------------------------------------------------|
| Gastritis viral                                                     | 1st year         | 1/1452 ( <0.1%) | 140607                                                                                                                                                                                                                                 |
|                                                                     | Overall          | 1/1452 ( <0.1%) | 140607                                                                                                                                                                                                                                 |
| Gastroenteritis                                                     | 1st year         | 16/1452 ( 1.1%) | 120606, 120612, 140526, 140818, 150154, 160109, 160219, 160632, 160808, 161118, 161226, 200906, 200930, 230215, 242505, 243319                                                                                                         |
|                                                                     | 2nd year         | 6/1206 ( 0.5%)  | 120311, 140512, 160709, 161302, 170604, 243316                                                                                                                                                                                         |
|                                                                     | 3rd year         | 7/1012 ( 0.7%)  | 150137, 160735, 160760, 170502, 200922, 230514, 241809                                                                                                                                                                                 |
|                                                                     | Overall          | 29/1452 ( 2.0%) | 120311, 120606, 120612, 140512, 140526, 140818, 150137, 150154, 160109, 160219, 160632, 160709, 160735, 160760, 160808, 161118, 161226, 161302, 170502, 170604, 200906, 200922, 200930, 230215, 230514, 241809, 242505, 243316, 243319 |
| Gastroenteritis rotavirus                                           | 1st year         | 1/1452 ( <0.1%) | 150122                                                                                                                                                                                                                                 |
|                                                                     | Overall          | 1/1452 ( <0.1%) | 150122                                                                                                                                                                                                                                 |
| Gastroenteritis viral                                               | 1st year         | 4/1452 ( 0.3%)  | 240708, 242503, 243902, 245806                                                                                                                                                                                                         |
|                                                                     | 2nd year         | 4/1206 ( 0.3%)  | 241401, 241417, 243316, 245913                                                                                                                                                                                                         |
|                                                                     | 3rd year         | 1/1012 ( <0.1%) | 242503                                                                                                                                                                                                                                 |
|                                                                     | Overall          | 8/1452 ( 0.6%)  | 240708, 241401, 241417, 242503, 243316, 243902, 245806, 245913                                                                                                                                                                         |
| Gastrointestinal bacterial infection                                | 1st year         | 1/1452 ( <0.1%) | 160530                                                                                                                                                                                                                                 |
|                                                                     | Overall          | 1/1452 ( <0.1%) | 160530                                                                                                                                                                                                                                 |
| Gastrointestinal viral infection                                    | 2nd year         | 1/1206 ( <0.1%) | 243331                                                                                                                                                                                                                                 |
|                                                                     | 3rd year         | 1/1012 ( <0.1%) | 241308                                                                                                                                                                                                                                 |
|                                                                     | Overall          | 2/1452 ( 0.1%)  | 241308, 243331                                                                                                                                                                                                                         |
| Genital candidiasis                                                 | 1st year         | 2/1452 ( 0.1%)  | 230416, 230909                                                                                                                                                                                                                         |
|                                                                     | 2nd year         | 1/1206 ( <0.1%) | 160114                                                                                                                                                                                                                                 |
|                                                                     | Overall          | 3/1452 ( 0.2%)  | 160114, 230416, 230909                                                                                                                                                                                                                 |

Table 14.3.1 / 10: Number of subjects with adverse events including subject identifier and year by treatment (FAS)  
 (cont.)

TREATMENT: LCS16

| Primary system organ class         | YEAR OF ONSET | N (%)           | subject identifier                                                                                             |
|------------------------------------|---------------|-----------------|----------------------------------------------------------------------------------------------------------------|
| Genital herpes                     | 1st year      | 8/1452 ( 0.6%)  | 141415, 160114, 160748, 161118, 210212, 241137, 241415, 241546                                                 |
|                                    | 2nd year      | 3/1206 ( 0.2%)  | 160955, 160978, 241420                                                                                         |
|                                    | 3rd year      | 4/1012 ( 0.4%)  | 160546, 160760, 240636, 241546                                                                                 |
|                                    | Overall       | 14/1452 ( 1.0%) | 141415, 160114, 160546, 160748, 160760, 160955, 160978, 161118, 210212, 240636, 241137, 241415, 241420, 241546 |
| Gonorrhoea                         | 1st year      | 1/1452 ( <0.1%) | 243034                                                                                                         |
|                                    | Overall       | 1/1452 ( <0.1%) | 243034                                                                                                         |
| Gynaecological chlamydia infection | 1st year      | 2/1452 ( 0.1%)  | 140810, 245704                                                                                                 |
|                                    | 2nd year      | 2/1206 ( 0.2%)  | 161214, 210212                                                                                                 |
|                                    | 3rd year      | 2/1012 ( 0.2%)  | 160714, 161214                                                                                                 |
|                                    | Overall       | 5/1452 ( 0.3%)  | 140810, 160714, 161214, 210212, 245704                                                                         |
| H1N1 influenza                     | 2nd year      | 5/1206 ( 0.4%)  | 140912, 150118, 160316, 160759, 242808                                                                         |
|                                    | Overall       | 5/1452 ( 0.3%)  | 140912, 150118, 160316, 160759, 242808                                                                         |
| Haemophilus infection              | 1st year      | 1/1452 ( <0.1%) | 243909                                                                                                         |
|                                    | Overall       | 1/1452 ( <0.1%) | 243909                                                                                                         |
| Hand-foot-and-mouth disease        | 3rd year      | 1/1012 ( <0.1%) | 160543                                                                                                         |
|                                    | Overall       | 1/1452 ( <0.1%) | 160543                                                                                                         |
| Helicobacter gastritis             | 2nd year      | 1/1206 ( <0.1%) | 241170                                                                                                         |
|                                    | Overall       | 1/1452 ( <0.1%) | 241170                                                                                                         |
| Herpes dermatitis                  | 1st year      | 1/1452 ( <0.1%) | 210405                                                                                                         |
|                                    | Overall       | 1/1452 ( <0.1%) | 210405                                                                                                         |
| Herpes simplex                     | 2nd year      | 2/1206 ( 0.2%)  | 210405, 245513                                                                                                 |
|                                    | 3rd year      | 1/1012 ( <0.1%) | 141016                                                                                                         |
|                                    | Overall       | 3/1452 ( 0.2%)  | 141016, 210405, 245513                                                                                         |

Table 14.3.1 / 10: Number of subjects with adverse events including subject identifier and year by treatment (FAS)  
 (cont.)

TREATMENT: LCS16

| Primary system organ class | YEAR OF ONSET | N (%)           | subject identifier                             |
|----------------------------|---------------|-----------------|------------------------------------------------|
| Herpes zoster              | 1st year      | 1/1452 ( <0.1%) | 160123                                         |
|                            | 2nd year      | 2/1206 ( 0.2%)  | 161401, 245908                                 |
|                            | 3rd year      | 1/1012 ( <0.1%) | 161107                                         |
|                            | Overall       | 4/1452 ( 0.3%)  | 160123, 161107, 161401, 245908                 |
| Impetigo                   | 1st year      | 1/1452 ( <0.1%) | 161502                                         |
|                            | 2nd year      | 1/1206 ( <0.1%) | 160969                                         |
|                            | Overall       | 2/1452 ( 0.1%)  | 160969, 161502                                 |
| Infected cyst              | 2nd year      | 1/1206 ( <0.1%) | 140112                                         |
|                            | Overall       | 1/1452 ( <0.1%) | 140112                                         |
| Infection                  | 2nd year      | 1/1206 ( <0.1%) | 160438                                         |
|                            | Overall       | 1/1452 ( <0.1%) | 160438                                         |
| Infectious mononucleosis   | 1st year      | 2/1452 ( 0.1%)  | 141420, 200603                                 |
|                            | 2nd year      | 4/1206 ( 0.3%)  | 161417, 230402, 243504, 243902                 |
|                            | Overall       | 6/1452 ( 0.4%)  | 141420, 161417, 200603, 230402, 243504, 243902 |

Table 14.3.1 / 10: Number of subjects with adverse events including subject identifier and year by treatment (FAS)  
 (cont.)

TREATMENT: LCS16

Primary system organ class

| Preferred term<br>MedDRA version 14.0 | YEAR OF<br>ONSET | N (%)           | subject identifier                                                                                                                                                                                                                                                                                                                                                                                                                                                                                                                                                                                                                                                                                                                                                             |
|---------------------------------------|------------------|-----------------|--------------------------------------------------------------------------------------------------------------------------------------------------------------------------------------------------------------------------------------------------------------------------------------------------------------------------------------------------------------------------------------------------------------------------------------------------------------------------------------------------------------------------------------------------------------------------------------------------------------------------------------------------------------------------------------------------------------------------------------------------------------------------------|
| Influenza                             | 1st year         | 59/1452 ( 4.1%) | 120103, 120303, 120317, 120328, 120404, 120425, 120612, 140101, 140103, 140205, 140524, 141415, 160307, 160314, 160319, 160324, 160508, 160546, 160603, 160611, 160618, 160621, 160622, 160627, 160629, 160635, 160636, 160730, 160751, 161223, 161302, 161310, 161311, 161320, 161321, 190102, 200102, 200116, 200225, 200509, 200513, 200525, 210103, 210105, 210112, 210133, 210212, 210605, 230119, 230305, 230609, 230811, 231109, 241503, 241901, 242312, 243211, 243225, 244309                                                                                                                                                                                                                                                                                         |
|                                       | 2nd year         | 32/1206 ( 2.7%) | 120317, 120334, 120410, 120425, 120609, 140506, 141411, 160219, 160428, 160563, 160629, 160632, 160636, 160745, 160748, 160752, 161211, 170403, 170604, 200118, 210103, 210123, 210413, 210605, 230317, 240133, 241418, 241731, 242317, 242501, 243714, 243976                                                                                                                                                                                                                                                                                                                                                                                                                                                                                                                 |
|                                       | 3rd year         | 14/1012 ( 1.4%) | 120309, 120317, 120410, 160332, 160553, 160602, 160611, 160618, 160632, 160906, 180717, 240631, 241809, 243316                                                                                                                                                                                                                                                                                                                                                                                                                                                                                                                                                                                                                                                                 |
|                                       | Overall          | 94/1452 ( 6.5%) | 120103, 120303, 120309, 120317, 120328, 120334, 120404, 120410, 120425, 120609, 120612, 140101, 140103, 140205, 140506, 140524, 141411, 141415, 160219, 160307, 160314, 160319, 160324, 160332, 160428, 160508, 160546, 160553, 160563, 160602, 160603, 160611, 160618, 160621, 160622, 160627, 160629, 160632, 160635, 160636, 160730, 160745, 160748, 160751, 160752, 160906, 161211, 161223, 161302, 161310, 161311, 161320, 161321, 170403, 170604, 180717, 190102, 200102, 200116, 200118, 200225, 200509, 200513, 200525, 210103, 210105, 210112, 210123, 210133, 210212, 210413, 210605, 230119, 230305, 230317, 230609, 230811, 231109, 240133, 240631, 241418, 241503, 241731, 241809, 241901, 242312, 242317, 242501, 243211, 243225, 243316, 243714, 243976, 244309 |



Table 14.3.1 / 10: Number of subjects with adverse events including subject identifier and year by treatment (FAS)  
 (cont.)

TREATMENT: LCS16

| Primary system organ class<br>Preferred term<br>MedDRA version 14.0 | YEAR OF<br>ONSET | N (%)           | subject identifier                                                             |
|---------------------------------------------------------------------|------------------|-----------------|--------------------------------------------------------------------------------|
| Keratitis viral                                                     | 1st year         | 1/1452 ( <0.1%) | 140812                                                                         |
|                                                                     | Overall          | 1/1452 ( <0.1%) | 140812                                                                         |
| Kidney infection                                                    | 1st year         | 1/1452 ( <0.1%) | 245924                                                                         |
|                                                                     | 2nd year         | 3/1206 ( 0.2%)  | 243934, 244446, 245908                                                         |
|                                                                     | Overall          | 4/1452 ( 0.3%)  | 243934, 244446, 245908, 245924                                                 |
| Labyrinthitis                                                       | 1st year         | 1/1452 ( <0.1%) | 141102                                                                         |
|                                                                     | Overall          | 1/1452 ( <0.1%) | 141102                                                                         |
| Laryngitis                                                          | 1st year         | 5/1452 ( 0.3%)  | 120408, 160737, 161526, 200212, 243316                                         |
|                                                                     | 2nd year         | 4/1206 ( 0.3%)  | 160628, 160724, 161004, 170408                                                 |
|                                                                     | 3rd year         | 2/1012 ( 0.2%)  | 161004, 200922                                                                 |
|                                                                     | Overall          | 10/1452 ( 0.7%) | 120408, 160628, 160724, 160737, 161004, 161526, 170408, 200212, 200922, 243316 |
| Laryngitis bacterial                                                | 1st year         | 1/1452 ( <0.1%) | 140101                                                                         |
|                                                                     | Overall          | 1/1452 ( <0.1%) | 140101                                                                         |
| Localised infection                                                 | 1st year         | 2/1452 ( 0.1%)  | 200702, 242317                                                                 |
|                                                                     | Overall          | 2/1452 ( 0.1%)  | 200702, 242317                                                                 |
| Lower respiratory tract infection                                   | 2nd year         | 1/1206 ( <0.1%) | 245522                                                                         |
|                                                                     | Overall          | 1/1452 ( <0.1%) | 245522                                                                         |
| Malaria                                                             | 2nd year         | 1/1206 ( <0.1%) | 161025                                                                         |
|                                                                     | Overall          | 1/1452 ( <0.1%) | 161025                                                                         |
| Mastitis                                                            | 1st year         | 1/1452 ( <0.1%) | 120635                                                                         |
|                                                                     | Overall          | 1/1452 ( <0.1%) | 120635                                                                         |
| Meningitis viral                                                    | 3rd year         | 1/1012 ( <0.1%) | 245427                                                                         |
|                                                                     | Overall          | 1/1452 ( <0.1%) | 245427                                                                         |
| Molluscum contagiosum                                               | 3rd year         | 1/1012 ( <0.1%) | 150120                                                                         |
|                                                                     | Overall          | 1/1452 ( <0.1%) | 150120                                                                         |

Table 14.3.1 / 10: Number of subjects with adverse events including subject identifier and year by treatment (FAS)  
(cont.)

TREATMENT: LCS16

Primary system organ class

Preferred term

MedDRA version 14.0

Nail infection

YEAR OF

ONSET

N (%)

1st year

Overall

1/1452 ( &lt;0.1%)

1/1452 ( &lt;0.1%)

subject identifier

245526

245526

Table 14.3.1 / 10: Number of subjects with adverse events including subject identifier and year by treatment (FAS)  
(cont.)

TREATMENT: LCS16

Primary system organ class

| Preferred term<br>MedDRA version 14.0 | YEAR OF<br>ONSET | N (%)            | subject identifier                                                                                                                                                                                                                                                                                                                                                                                                                                                                                                                                                                                                      |
|---------------------------------------|------------------|------------------|-------------------------------------------------------------------------------------------------------------------------------------------------------------------------------------------------------------------------------------------------------------------------------------------------------------------------------------------------------------------------------------------------------------------------------------------------------------------------------------------------------------------------------------------------------------------------------------------------------------------------|
| Nasopharyngitis                       | 1st year         | 73/1452 ( 5.0%)  | 120334, 120606, 140101, 140211, 140906, 141304, 141410, 150137, 150139, 150159, 160114, 160115, 160126, 160724, 160735, 160748, 161302, 161320, 161321, 161535, 180702, 180718, 180720, 180737, 210102, 210121, 210212, 210410, 230105, 230118, 230119, 230309, 230414, 230503, 230505, 230507, 230610, 230612, 230614, 230810, 230905, 230915, 231011, 231020, 231104, 240127, 240133, 240504, 241137, 241138, 241152, 241709, 241809, 242301, 242310, 242503, 242908, 242918, 243205, 243606, 243923, 243936, 243949, 243971, 243975, 244123, 244305, 244315, 244317, 244902, 244923, 244926, 245511                  |
|                                       | 2nd year         | 36/1206 ( 3.0%)  | 120324, 120328, 140101, 140106, 140120, 140205, 140504, 140506, 141304, 141401, 141408, 150141, 150159, 160702, 160709, 160716, 160761, 161306, 161320, 161529, 210413, 230111, 230507, 230609, 230614, 230822, 230905, 231001, 231020, 231104, 241809, 242918, 243225, 244106, 244123, 244401                                                                                                                                                                                                                                                                                                                          |
|                                       | 3rd year         | 24/1012 ( 2.4%)  | 140119, 140805, 141420, 150115, 150118, 150137, 160709, 160719, 161306, 161320, 180718, 210121, 210413, 230305, 230309, 230503, 240127, 242904, 242918, 243928, 243960, 244130, 244317, 244410                                                                                                                                                                                                                                                                                                                                                                                                                          |
|                                       | Overall          | 109/1452 ( 7.5%) | 120324, 120328, 120334, 120606, 140101, 140106, 140119, 140120, 140205, 140211, 140504, 140506, 140805, 140906, 141304, 141401, 141408, 141410, 141420, 150115, 150118, 150137, 150139, 150141, 150159, 160114, 160115, 160126, 160702, 160709, 160716, 160719, 160724, 160735, 160748, 160761, 161302, 161306, 161320, 161321, 161529, 161535, 180702, 180718, 180720, 180737, 210102, 210121, 210212, 210410, 210413, 230105, 230111, 230118, 230119, 230305, 230309, 230414, 230503, 230505, 230507, 230609, 230610, 230612, 230614, 230810, 230822, 230905, 230915, 231001, 231011, 231020, 231104, 240127, 240133, |

Table 14.3.1 / 10: Number of subjects with adverse events including subject identifier and year by treatment (FAS)  
 (cont.)

TREATMENT: LCS16

| Primary system organ class<br>Preferred term<br>MedDRA version 14.0 | YEAR OF<br>ONSET |  | N (%)           | subject identifier                                                                                                                                                                                                                                                                               |
|---------------------------------------------------------------------|------------------|--|-----------------|--------------------------------------------------------------------------------------------------------------------------------------------------------------------------------------------------------------------------------------------------------------------------------------------------|
|                                                                     |                  |  |                 | 240504, 241137, 241138, 241152, 241709, 241809,<br>242301, 242310, 242503, 242904, 242908, 242918,<br>243205, 243225, 243606, 243923, 243928, 243936,<br>243949, 243960, 243971, 243975, 244106, 244123,<br>244130,<br>244305, 244315, 244317, 244401, 244410, 244902,<br>244923, 244926, 245511 |
| Nipple infection                                                    | 3rd year         |  | 1/1012 ( <0.1%) | 241705                                                                                                                                                                                                                                                                                           |
|                                                                     | Overall          |  | 1/1452 ( <0.1%) | 241705                                                                                                                                                                                                                                                                                           |
| Omphalitis                                                          | 1st year         |  | 1/1452 ( <0.1%) | 150126                                                                                                                                                                                                                                                                                           |
|                                                                     | Overall          |  | 1/1452 ( <0.1%) | 150126                                                                                                                                                                                                                                                                                           |
| Onychomycosis                                                       | 1st year         |  | 2/1452 ( 0.1%)  | 161433, 242324                                                                                                                                                                                                                                                                                   |
|                                                                     | 2nd year         |  | 2/1206 ( 0.2%)  | 120308, 180732                                                                                                                                                                                                                                                                                   |
|                                                                     | Overall          |  | 4/1452 ( 0.3%)  | 120308, 161433, 180732, 242324                                                                                                                                                                                                                                                                   |
| Oophoritis                                                          | 1st year         |  | 1/1452 ( <0.1%) | 180112                                                                                                                                                                                                                                                                                           |
|                                                                     | Overall          |  | 1/1452 ( <0.1%) | 180112                                                                                                                                                                                                                                                                                           |
| Oral candidiasis                                                    | 2nd year         |  | 1/1206 ( <0.1%) | 160635                                                                                                                                                                                                                                                                                           |
|                                                                     | Overall          |  | 1/1452 ( <0.1%) | 160635                                                                                                                                                                                                                                                                                           |
| Oral herpes                                                         | 1st year         |  | 3/1452 ( 0.2%)  | 120334, 140810, 245511                                                                                                                                                                                                                                                                           |
|                                                                     | 2nd year         |  | 4/1206 ( 0.3%)  | 141016, 160115, 160969, 161534                                                                                                                                                                                                                                                                   |
|                                                                     | 3rd year         |  | 4/1012 ( 0.4%)  | 140805, 150114, 160115, 210405                                                                                                                                                                                                                                                                   |
|                                                                     | Overall          |  | 10/1452 ( 0.7%) | 120334, 140805, 140810, 141016, 150114, 160115,<br>160969, 161534, 210405, 245511                                                                                                                                                                                                                |
| Osteomyelitis                                                       | 1st year         |  | 1/1452 ( <0.1%) | 231011                                                                                                                                                                                                                                                                                           |
|                                                                     | 2nd year         |  | 1/1206 ( <0.1%) | 231011                                                                                                                                                                                                                                                                                           |
|                                                                     | Overall          |  | 1/1452 ( <0.1%) | 231011                                                                                                                                                                                                                                                                                           |
| Otitis externa                                                      | 2nd year         |  | 2/1206 ( 0.2%)  | 140601, 160642                                                                                                                                                                                                                                                                                   |
|                                                                     | 3rd year         |  | 2/1012 ( 0.2%)  | 160526, 160642                                                                                                                                                                                                                                                                                   |
|                                                                     | Overall          |  | 3/1452 ( 0.2%)  | 140601, 160526, 160642                                                                                                                                                                                                                                                                           |

Table 14.3.1 / 10: Number of subjects with adverse events including subject identifier and year by treatment (FAS)  
 (cont.)

TREATMENT: LCS16

| Primary system organ class<br>Preferred term<br>MedDRA version 14.0 | YEAR OF<br>ONSET | N (%)           | subject identifier                                                                                                                                                     |
|---------------------------------------------------------------------|------------------|-----------------|------------------------------------------------------------------------------------------------------------------------------------------------------------------------|
| Otitis media                                                        | 1st year         | 3/1452 ( 0.2%)  | 160332, 160627, 161423                                                                                                                                                 |
|                                                                     | 2nd year         | 3/1206 ( 0.2%)  | 160221, 160627, 161434                                                                                                                                                 |
|                                                                     | 3rd year         | 1/1012 ( <0.1%) | 160324                                                                                                                                                                 |
|                                                                     | Overall          | 6/1452 ( 0.4%)  | 160221, 160324, 160332, 160627, 161423, 161434                                                                                                                         |
| Otitis media acute                                                  | 1st year         | 1/1452 ( <0.1%) | 200510                                                                                                                                                                 |
|                                                                     | Overall          | 1/1452 ( <0.1%) | 200510                                                                                                                                                                 |
| Papilloma viral infection                                           | 1st year         | 1/1452 ( <0.1%) | 230415                                                                                                                                                                 |
|                                                                     | Overall          | 1/1452 ( <0.1%) | 230415                                                                                                                                                                 |
| Paronychia                                                          | 1st year         | 1/1452 ( <0.1%) | 160961                                                                                                                                                                 |
|                                                                     | 2nd year         | 1/1206 ( <0.1%) | 160934                                                                                                                                                                 |
|                                                                     | Overall          | 2/1452 ( 0.1%)  | 160934, 160961                                                                                                                                                         |
| Pelvic infection                                                    | 1st year         | 1/1452 ( <0.1%) | 170602                                                                                                                                                                 |
|                                                                     | Overall          | 1/1452 ( <0.1%) | 170602                                                                                                                                                                 |
| Pelvic inflammatory disease                                         | 1st year         | 4/1452 ( 0.3%)  | 141407, 160410, 161024, 180629                                                                                                                                         |
|                                                                     | 3rd year         | 1/1012 ( <0.1%) | 180667                                                                                                                                                                 |
|                                                                     | Overall          | 5/1452 ( 0.3%)  | 141407, 160410, 161024, 180629, 180667                                                                                                                                 |
| Peritonsillar abscess                                               | 1st year         | 1/1452 ( <0.1%) | 160919                                                                                                                                                                 |
|                                                                     | Overall          | 1/1452 ( <0.1%) | 160919                                                                                                                                                                 |
| Pharyngitis                                                         | 1st year         | 14/1452 ( 1.0%) | 120103, 120309, 120406, 120410, 120420, 120606, 120607, 120622, 140604, 150114, 160327, 160761, 190408, 200603                                                         |
|                                                                     | 2nd year         | 4/1206 ( 0.3%)  | 120308, 120328, 160126, 161204                                                                                                                                         |
|                                                                     | 3rd year         | 4/1012 ( 0.4%)  | 120308, 140112, 190123, 244802                                                                                                                                         |
|                                                                     | Overall          | 21/1452 ( 1.4%) | 120103, 120308, 120309, 120328, 120406, 120410, 120420, 120606, 120607, 120622, 140112, 140604, 150114, 160126, 160327, 160761, 161204, 190123, 190408, 200603, 244802 |

Table 14.3.1 / 10: Number of subjects with adverse events including subject identifier and year by treatment (FAS)  
 (cont.)

TREATMENT: LCS16

| Primary system organ class<br>Preferred term<br>MedDRA version 14.0 | YEAR OF<br>ONSET | N (%)           | subject identifier                                                                                                                                                     |
|---------------------------------------------------------------------|------------------|-----------------|------------------------------------------------------------------------------------------------------------------------------------------------------------------------|
| Pharyngitis streptococcal                                           | 1st year         | 12/1452 ( 0.8%) | 140909, 141411, 210103, 241114, 241205, 241243, 241401, 241533, 242905, 242918, 243223, 245927                                                                         |
|                                                                     | 2nd year         | 5/1206 ( 0.4%)  | 140514, 141411, 243315, 243504, 243902                                                                                                                                 |
|                                                                     | 3rd year         | 5/1012 ( 0.5%)  | 140112, 141304, 242310, 244435, 246218                                                                                                                                 |
|                                                                     | Overall          | 21/1452 ( 1.4%) | 140112, 140514, 140909, 141304, 141411, 210103, 241114, 241205, 241243, 241401, 241533, 242310, 242905, 242918, 243223, 243315, 243504, 243902, 244435, 245927, 246218 |
| Pneumonia                                                           | 1st year         | 6/1452 ( 0.4%)  | 140805, 200217, 200510, 230305, 242905, 244305                                                                                                                         |
|                                                                     | 2nd year         | 8/1206 ( 0.7%)  | 120635, 140103, 180721, 230126, 230211, 230220, 230614, 243909                                                                                                         |
|                                                                     | 3rd year         | 2/1012 ( 0.2%)  | 161123, 244305                                                                                                                                                         |
|                                                                     | Overall          | 15/1452 ( 1.0%) | 120635, 140103, 140805, 161123, 180721, 200217, 200510, 230126, 230211, 230220, 230305, 230614, 242905, 243909, 244305                                                 |
| Post procedural infection                                           | 3rd year         | 1/1012 ( <0.1%) | 161309                                                                                                                                                                 |
|                                                                     | Overall          | 1/1452 ( <0.1%) | 161309                                                                                                                                                                 |
| Pulpitis dental                                                     | 2nd year         | 1/1206 ( <0.1%) | 161123                                                                                                                                                                 |
|                                                                     | Overall          | 1/1452 ( <0.1%) | 161123                                                                                                                                                                 |
| Pyelonephritis                                                      | 1st year         | 2/1452 ( 0.1%)  | 140504, 141023                                                                                                                                                         |
|                                                                     | 2nd year         | 1/1206 ( <0.1%) | 200212                                                                                                                                                                 |
|                                                                     | Overall          | 3/1452 ( 0.2%)  | 140504, 141023, 200212                                                                                                                                                 |
| Rash pustular                                                       | 1st year         | 1/1452 ( <0.1%) | 242915                                                                                                                                                                 |
|                                                                     | Overall          | 1/1452 ( <0.1%) | 242915                                                                                                                                                                 |
| Respiratory tract infection                                         | 1st year         | 7/1452 ( 0.5%)  | 140909, 160702, 160707, 161116, 161302, 161306, 161502                                                                                                                 |
|                                                                     | 2nd year         | 5/1206 ( 0.4%)  | 120612, 161116, 161123, 161306, 161526                                                                                                                                 |
|                                                                     | 3rd year         | 9/1012 ( 0.9%)  | 160747, 161105, 161107, 161115, 161123, 161214, 161306, 161526, 243923                                                                                                 |
|                                                                     | Overall          | 16/1452 ( 1.1%) | 120612, 140909, 160702, 160707, 160747, 161105, 161107, 161115, 161116, 161123, 161214, 161302, 161306, 161502, 161526, 243923                                         |

Table 14.3.1 / 10: Number of subjects with adverse events including subject identifier and year by treatment (FAS)  
 (cont.)

TREATMENT: LCS16

| Primary system organ class<br>Preferred term<br>MedDRA version 14.0 | YEAR OF<br>ONSET | N (%)           | subject identifier                                                                                |
|---------------------------------------------------------------------|------------------|-----------------|---------------------------------------------------------------------------------------------------|
| Respiratory tract infection viral                                   | 1st year         | 1/1452 ( <0.1%) | 243319                                                                                            |
|                                                                     | Overall          | 1/1452 ( <0.1%) | 243319                                                                                            |
| Rhinitis                                                            | 1st year         | 7/1452 ( 0.5%)  | 120404, 120406, 120420, 160611, 161223, 210410,<br>241802                                         |
|                                                                     | 2nd year         | 4/1206 ( 0.3%)  | 140611, 161025, 161131, 161535                                                                    |
|                                                                     | 3rd year         | 1/1012 ( <0.1%) | 210605                                                                                            |
|                                                                     | Overall          | 12/1452 ( 0.8%) | 120404, 120406, 120420, 140611, 160611, 161025,<br>161131, 161223, 161535, 210410, 210605, 241802 |
| Salpingo-oophoritis                                                 | 1st year         | 3/1452 ( 0.2%)  | 180117, 180702, 180713                                                                            |
|                                                                     | Overall          | 3/1452 ( 0.2%)  | 180117, 180702, 180713                                                                            |
| Sinobronchitis                                                      | 3rd year         | 1/1012 ( <0.1%) | 161529                                                                                            |
|                                                                     | Overall          | 1/1452 ( <0.1%) | 161529                                                                                            |

Table 14.3.1 / 10: Number of subjects with adverse events including subject identifier and year by treatment (FAS)  
 (cont.)

TREATMENT: LCS16

| Primary system organ class<br>Preferred term<br>MedDRA version 14.0 | YEAR OF<br>ONSET | N (%)           | subject identifier                                                                                                                                                                                                                                                                                                                                                                                                                                                                                                                                                                                                                                                                                                                                                                             |
|---------------------------------------------------------------------|------------------|-----------------|------------------------------------------------------------------------------------------------------------------------------------------------------------------------------------------------------------------------------------------------------------------------------------------------------------------------------------------------------------------------------------------------------------------------------------------------------------------------------------------------------------------------------------------------------------------------------------------------------------------------------------------------------------------------------------------------------------------------------------------------------------------------------------------------|
| Sinusitis                                                           | 1st year         | 47/1452 ( 3.2%) | 140106, 140514, 140805, 140818, 141030, 141411, 150122, 160319, 160504, 160508, 160531, 160608, 160621, 160632, 160808, 161204, 161217, 161508, 161534, 161535, 161536, 180708, 200620, 200632, 200701, 200920, 210133, 230309, 240313, 240633, 240705, 240803, 241155, 241301, 241417, 241501, 241535, 241802, 242310, 242321, 243215, 243901, 243957, 244514, 245522, 245801, 246218                                                                                                                                                                                                                                                                                                                                                                                                         |
|                                                                     | 2nd year         | 34/1206 ( 2.8%) | 140804, 140812, 141018, 160319, 160324, 160429, 160532, 160543, 160553, 160603, 160719, 161108, 161209, 161223, 161315, 161524, 161534, 161535, 161536, 170604, 180732, 200509, 200609, 200920, 200922, 230915, 240240, 240705, 243822, 244123, 244202, 244433, 245905, 245927                                                                                                                                                                                                                                                                                                                                                                                                                                                                                                                 |
|                                                                     | 3rd year         | 29/1012 ( 2.9%) | 120617, 160319, 160543, 160608, 160755, 160906, 160919, 160921, 160987, 161223, 161306, 161311, 161315, 161434, 161524, 200509, 210601, 230222, 230305, 240614, 240626, 240631, 241401, 241809, 242705, 244315, 244517, 245908, 246218                                                                                                                                                                                                                                                                                                                                                                                                                                                                                                                                                         |
|                                                                     | Overall          | 96/1452 ( 6.6%) | 120617, 140106, 140514, 140804, 140805, 140812, 140818, 141018, 141030, 141411, 150122, 160319, 160324, 160429, 160504, 160508, 160531, 160532, 160543, 160553, 160603, 160608, 160621, 160632, 160719, 160755, 160808, 160906, 160919, 160921, 160987, 161108, 161204, 161209, 161217, 161223, 161306, 161311, 161315, 161434, 161508, 161524, 161534, 161535, 161536, 170604, 180708, 180732, 200509, 200609, 200620, 200632, 200701, 200920, 200922, 210133, 210601, 230222, 230305, 230309, 230915, 240240, 240313, 240614, 240626, 240631, 240633, 240705, 240803, 241155, 241301, 241401, 241417, 241501, 241535, 241802, 241809, 242310, 242321, 242705, 243215, 243822, 243901, 243957, 244123, 244202, 244315, 244433, 244514, 244517, 245522, 245801, 245905, 245908, 245927, 246218 |



Table 14.3.1 / 10: Number of subjects with adverse events including subject identifier and year by treatment (FAS)  
 (cont.)

TREATMENT: LCS16

| Primary system organ class<br>Preferred term<br>MedDRA version 14.0 | YEAR OF<br>ONSET | N (%)           | subject identifier                                                                                                                                                                             |
|---------------------------------------------------------------------|------------------|-----------------|------------------------------------------------------------------------------------------------------------------------------------------------------------------------------------------------|
| Skin bacterial infection                                            | 1st year         | 1/1452 ( <0.1%) | 243319                                                                                                                                                                                         |
|                                                                     | 3rd year         | 1/1012 ( <0.1%) | 141108                                                                                                                                                                                         |
|                                                                     | Overall          | 2/1452 ( 0.1%)  | 141108, 243319                                                                                                                                                                                 |
| Skin infection                                                      | 1st year         | 2/1452 ( 0.1%)  | 150117, 245526                                                                                                                                                                                 |
|                                                                     | 2nd year         | 2/1206 ( 0.2%)  | 161306, 210405                                                                                                                                                                                 |
|                                                                     | 3rd year         | 2/1012 ( 0.2%)  | 230601, 241603                                                                                                                                                                                 |
|                                                                     | Overall          | 6/1452 ( 0.4%)  | 150117, 161306, 210405, 230601, 241603, 245526                                                                                                                                                 |
| Small intestinal bacterial overgrowth                               | 3rd year         | 1/1012 ( <0.1%) | 243501                                                                                                                                                                                         |
|                                                                     | Overall          | 1/1452 ( <0.1%) | 243501                                                                                                                                                                                         |
| Staphylococcal infection                                            | 1st year         | 1/1452 ( <0.1%) | 240633                                                                                                                                                                                         |
|                                                                     | Overall          | 1/1452 ( <0.1%) | 240633                                                                                                                                                                                         |
| Subcutaneous abscess                                                | 2nd year         | 2/1206 ( 0.2%)  | 120229, 243205                                                                                                                                                                                 |
|                                                                     | Overall          | 2/1452 ( 0.1%)  | 120229, 243205                                                                                                                                                                                 |
| Tinea infection                                                     | 3rd year         | 2/1012 ( 0.2%)  | 140526, 244410                                                                                                                                                                                 |
|                                                                     | Overall          | 2/1452 ( 0.1%)  | 140526, 244410                                                                                                                                                                                 |
| Tinea pedis                                                         | 1st year         | 1/1452 ( <0.1%) | 161422                                                                                                                                                                                         |
|                                                                     | Overall          | 1/1452 ( <0.1%) | 161422                                                                                                                                                                                         |
| Tinea versicolour                                                   | 1st year         | 1/1452 ( <0.1%) | 241556                                                                                                                                                                                         |
|                                                                     | Overall          | 1/1452 ( <0.1%) | 241556                                                                                                                                                                                         |
| Tonsillitis                                                         | 1st year         | 8/1452 ( 0.6%)  | 120631, 160611, 160636, 210501, 230305, 230404, 230811, 230814                                                                                                                                 |
|                                                                     | 2nd year         | 8/1206 ( 0.7%)  | 120635, 141016, 141030, 150118, 160987, 161016, 161306, 243902                                                                                                                                 |
|                                                                     | 3rd year         | 8/1012 ( 0.8%)  | 120410, 161506, 180625, 190114, 230609, 230614, 230704, 245806                                                                                                                                 |
|                                                                     | Overall          | 24/1452 ( 1.7%) | 120410, 120631, 120635, 141016, 141030, 150118, 160611, 160636, 160987, 161016, 161306, 161506, 180625, 190114, 210501, 230305, 230404, 230609, 230614, 230704, 230811, 230814, 243902, 245806 |

Table 14.3.1 / 10: Number of subjects with adverse events including subject identifier and year by treatment (FAS)  
 (cont.)

TREATMENT: LCS16

| Primary system organ class | YEAR OF ONSET | N (%)           | subject identifier                                                                                                     |
|----------------------------|---------------|-----------------|------------------------------------------------------------------------------------------------------------------------|
| Tooth abscess              | 1st year      | 3/1452 ( 0.2%)  | 242505, 243101, 244916                                                                                                 |
|                            | 2nd year      | 1/1206 ( <0.1%) | 245918                                                                                                                 |
|                            | Overall       | 4/1452 ( 0.3%)  | 242505, 243101, 244916, 245918                                                                                         |
| Tooth infection            | 1st year      | 7/1452 ( 0.5%)  | 120607, 150165, 160716, 161211, 210212, 231011, 231021                                                                 |
|                            | 2nd year      | 3/1206 ( 0.2%)  | 210405, 243813, 244519                                                                                                 |
|                            | 3rd year      | 6/1012 ( 0.6%)  | 120425, 120631, 140915, 210128, 210405, 244123                                                                         |
|                            | Overall       | 15/1452 ( 1.0%) | 120425, 120607, 120631, 140915, 150165, 160716, 161211, 210128, 210212, 210405, 231011, 231021, 243813, 244123, 244519 |
| Trichomoniasis             | 2nd year      | 1/1206 ( <0.1%) | 241139                                                                                                                 |
|                            | 3rd year      | 1/1012 ( <0.1%) | 241709                                                                                                                 |
|                            | Overall       | 2/1452 ( 0.1%)  | 241139, 241709                                                                                                         |
| Typhoid fever              | 1st year      | 1/1452 ( <0.1%) | 190108                                                                                                                 |
|                            | Overall       | 1/1452 ( <0.1%) | 190108                                                                                                                 |

Table 14.3.1 / 10: Number of subjects with adverse events including subject identifier and year by treatment (FAS)  
 (cont.)

TREATMENT: LCS16

| Primary system organ class<br>Preferred term<br>MedDRA version 14.0 | YEAR OF<br>ONSET | N (%)           | subject identifier                                                                                                                                                                                                                                                                                                                                                                                                                                                     |
|---------------------------------------------------------------------|------------------|-----------------|------------------------------------------------------------------------------------------------------------------------------------------------------------------------------------------------------------------------------------------------------------------------------------------------------------------------------------------------------------------------------------------------------------------------------------------------------------------------|
| Upper respiratory tract infection                                   | 1st year         | 41/1452 ( 2.8%) | 140810, 140818, 160737, 160975, 161004, 161116, 230209, 230514, 240506, 240522, 240614, 241308, 241310, 241401, 241415, 241417, 241533, 241901, 242918, 243301, 243303, 243315, 243321, 243501, 243608, 244401, 244410, 244424, 244437, 244449, 244501, 244514, 244517, 244519, 244520, 244619, 244935, 245524, 245922, 245927, 245930                                                                                                                                 |
|                                                                     | 2nd year         | 20/1206 ( 1.7%) | 161004, 161016, 161025, 161116, 161131, 161402, 240717, 241420, 241430, 242904, 243301, 243401, 243822, 244424, 244519, 244520, 244525, 244619, 244808, 245908                                                                                                                                                                                                                                                                                                         |
|                                                                     | 3rd year         | 8/1012 ( 0.8%)  | 161116, 230209, 240333, 241308, 241310, 241401, 241412, 241731                                                                                                                                                                                                                                                                                                                                                                                                         |
|                                                                     | Overall          | 57/1452 ( 3.9%) | 140810, 140818, 160737, 160975, 161004, 161016, 161025, 161116, 161131, 161402, 230209, 230514, 240333, 240506, 240522, 240614, 240717, 241308, 241310, 241401, 241412, 241415, 241417, 241420, 241430, 241533, 241731, 241901, 242904, 242918, 243301, 243303, 243315, 243321, 243401, 243501, 243608, 243822, 244401, 244410, 244424, 244437, 244449, 244501, 244514, 244517, 244519, 244520, 244525, 244619, 244808, 244935, 245524, 245908, 245922, 245927, 245930 |

Table 14.3.1 / 10: Number of subjects with adverse events including subject identifier and year by treatment (FAS)  
 (cont.)

TREATMENT: LCS16

| Primary system organ class<br>Preferred term<br>MedDRA version 14.0 | YEAR OF<br>ONSET | N (%)             | subject identifier                                                                                                                                                                                                                                                                                                                                                                                                                                                                                                                                                                                                                                                                                                     |
|---------------------------------------------------------------------|------------------|-------------------|------------------------------------------------------------------------------------------------------------------------------------------------------------------------------------------------------------------------------------------------------------------------------------------------------------------------------------------------------------------------------------------------------------------------------------------------------------------------------------------------------------------------------------------------------------------------------------------------------------------------------------------------------------------------------------------------------------------------|
| Urinary tract infection                                             | 1st year         | 87/1452 ( 6.0%)   | 120102, 120309, 120415, 120606, 120617, 120618, 140526, 140610, 140720, 140915, 150113, 150120, 150121, 150137, 150141, 150150, 150160, 150211, 160109, 160122, 160210, 160503, 160602, 160628, 160632, 160642, 160718, 160727, 160955, 160966, 160987, 161008, 161113, 161307, 161401, 161402, 161415, 161433, 190142, 210105, 210405, 210413, 230121, 230207, 230305, 230306, 230601, 230614, 231013, 231015, 231110, 240523, 240620, 240708, 240803, 241114, 241140, 241152, 241235, 241301, 241403, 241537, 241608, 241716, 241726, 242813, 243024, 243211, 243321, 243601, 243604, 243909, 243964, 244120, 244128, 244409, 244433, 244449, 244521, 244703, 244801, 245409, 245504, 245526, 245704, 245908, 245927 |
|                                                                     | 2nd year         | 38/1206 ( 3.2%)   | 120612, 120635, 140506, 140509, 141413, 150113, 150126, 150141, 150504, 160534, 160603, 160723, 161008, 161302, 161402, 210132, 230416, 230807, 230811, 231021, 240103, 240133, 240620, 240632, 240722, 241310, 241519, 242501, 243316, 243911, 243936, 244429, 244514, 244521, 244616, 244801, 245801, 246201                                                                                                                                                                                                                                                                                                                                                                                                         |
|                                                                     | 3rd year         | 38/1012 ( 3.8%)   | 120328, 140216, 140509, 140601, 140611, 140812, 150126, 150141, 160419, 160529, 160534, 160603, 160642, 160961, 161311, 161538, 170408, 180640, 180659, 230106, 230207, 230807, 231011, 240711, 241173, 241510, 241546, 242505, 242801, 242908, 243319, 243937, 243976, 244406, 244703, 244802, 245927, 246201                                                                                                                                                                                                                                                                                                                                                                                                         |
|                                                                     | Overall          | 145/1452 ( 10.0%) | 120102, 120309, 120328, 120415, 120606, 120612, 120617, 120618, 120635, 140216, 140506, 140509, 140526, 140601, 140610, 140611, 140720, 140812, 140915, 141413, 150113, 150120, 150121, 150126, 150137,                                                                                                                                                                                                                                                                                                                                                                                                                                                                                                                |

Table 14.3.1 / 10: Number of subjects with adverse events including subject identifier and year by treatment (FAS)  
 (cont.)

TREATMENT: LCS16

| Primary system organ class | YEAR OF  |                 | subject identifier                                                                                                                                                                                                                                                                                                                                                                                                                                                                                                                                                                                                                                                                                                                                                                                                                                                                                                                                                                             |
|----------------------------|----------|-----------------|------------------------------------------------------------------------------------------------------------------------------------------------------------------------------------------------------------------------------------------------------------------------------------------------------------------------------------------------------------------------------------------------------------------------------------------------------------------------------------------------------------------------------------------------------------------------------------------------------------------------------------------------------------------------------------------------------------------------------------------------------------------------------------------------------------------------------------------------------------------------------------------------------------------------------------------------------------------------------------------------|
| Preferred term             | ONSET    | N (%)           |                                                                                                                                                                                                                                                                                                                                                                                                                                                                                                                                                                                                                                                                                                                                                                                                                                                                                                                                                                                                |
| MedDRA version 14.0        |          |                 |                                                                                                                                                                                                                                                                                                                                                                                                                                                                                                                                                                                                                                                                                                                                                                                                                                                                                                                                                                                                |
|                            |          |                 | 150141, 150150, 150160, 150211, 150504, 160109, 160122, 160210, 160419, 160503, 160529, 160534, 160602, 160603, 160628, 160632, 160642, 160718, 160723, 160727, 160955, 160961, 160966, 160987, 161008, 161113, 161302, 161307, 161311, 161401, 161402, 161415, 161433, 161538, 170408, 180640, 180659, 190142, 210105, 210132, 210405, 210413, 230106, 230121, 230207, 230305, 230306, 230416, 230601, 230614, 230807, 230811, 231011, 231013, 231015, 231021, 231110, 240103, 240133, 240523, 240620, 240632, 240708, 240711, 240722, 240803, 241114, 241140, 241152, 241173, 241235, 241301, 241310, 241403, 241510, 241519, 241537, 241546, 241608, 241716, 241726, 242501, 242505, 242801, 242813, 242908, 243024, 243211, 243316, 243319, 243321, 243601, 243604, 243909, 243911, 243936, 243937, 243964, 243976, 244120, 244128, 244406, 244409, 244429, 244433, 244449, 244514, 244521, 244616, 244703, 244801, 244802, 245409, 245504, 245526, 245704, 245801, 245908, 245927, 246201 |
| Uterine infection          | 1st year | 1/1452 ( <0.1%) | 244804                                                                                                                                                                                                                                                                                                                                                                                                                                                                                                                                                                                                                                                                                                                                                                                                                                                                                                                                                                                         |
|                            | Overall  | 1/1452 ( <0.1%) | 244804                                                                                                                                                                                                                                                                                                                                                                                                                                                                                                                                                                                                                                                                                                                                                                                                                                                                                                                                                                                         |

Table 14.3.1 / 10: Number of subjects with adverse events including subject identifier and year by treatment (FAS)  
 (cont.)

TREATMENT: LCS16

| Primary system organ class<br>Preferred term<br>MedDRA version 14.0 | YEAR OF<br>ONSET | N (%)           | subject identifier                                                                                                                                                                                                                                                                                                                                                                                                                                                                             |
|---------------------------------------------------------------------|------------------|-----------------|------------------------------------------------------------------------------------------------------------------------------------------------------------------------------------------------------------------------------------------------------------------------------------------------------------------------------------------------------------------------------------------------------------------------------------------------------------------------------------------------|
| Vaginal infection                                                   | 1st year         | 40/1452 ( 2.8%) | 120125, 120408, 140506, 140512, 140514, 140526, 140801, 140810, 140812, 150157, 160312, 160441, 160503, 160529, 160608, 160622, 160632, 160635, 160641, 160961, 161008, 161223, 161429, 180112, 180708, 190114, 190122, 190142, 190202, 190206, 190207, 190212, 190213, 190214, 190227, 210117, 210123, 230717, 241415, 244801                                                                                                                                                                 |
|                                                                     | 2nd year         | 10/1206 ( 0.8%) | 140120, 140812, 141024, 160319, 160552, 170701, 180708, 180738, 243315, 244616                                                                                                                                                                                                                                                                                                                                                                                                                 |
|                                                                     | 3rd year         | 15/1012 ( 1.5%) | 140610, 140812, 141030, 141304, 160570, 160612, 160632, 161302, 180340, 190134, 190142, 190604, 240636, 244202, 246134                                                                                                                                                                                                                                                                                                                                                                         |
|                                                                     | Overall          | 60/1452 ( 4.1%) | 120125, 120408, 140120, 140506, 140512, 140514, 140526, 140610, 140801, 140810, 140812, 141024, 141030, 141304, 150157, 160312, 160319, 160441, 160503, 160529, 160552, 160570, 160608, 160612, 160622, 160632, 160635, 160641, 160961, 161008, 161223, 161302, 161429, 170701, 180112, 180340, 180708, 180738, 190114, 190122, 190134, 190142, 190202, 190206, 190207, 190212, 190213, 190214, 190227, 190604, 210117, 210123, 230717, 240636, 241415, 243315, 244202, 244616, 244801, 246134 |

Table 14.3.1 / 10: Number of subjects with adverse events including subject identifier and year by treatment (FAS)  
(cont.)

TREATMENT: LCS16

| Primary system organ class<br>Preferred term<br>MedDRA version 14.0 | YEAR OF<br>ONSET | N (%)            | subject identifier                                                                                                                                                                                                                                                                                                                                                                                                                                                                                     |
|---------------------------------------------------------------------|------------------|------------------|--------------------------------------------------------------------------------------------------------------------------------------------------------------------------------------------------------------------------------------------------------------------------------------------------------------------------------------------------------------------------------------------------------------------------------------------------------------------------------------------------------|
| Vaginitis bacterial                                                 | 1st year         | 61/1452 ( 4.2%)  | 120337, 120402, 140610, 140801, 140804, 140916, 141111, 150113, 150126, 150140, 150150, 160602, 160718, 160762, 180632, 180678, 210112, 210133, 230416, 240114, 240128, 240233, 240501, 240506, 240522, 240621, 240624, 240636, 240708, 241008, 241022, 241301, 241503, 241522, 241537, 241546, 242817, 243032, 243034, 243406, 243956, 243966, 243967, 243977, 244113, 244120, 244133, 244303, 244716, 244801, 244802, 244916, 244922, 244926, 244935, 245002, 245013, 245030, 245704, 246113, 246146 |
|                                                                     | 2nd year         | 50/1206 ( 4.1%)  | 120229, 140804, 141401, 150164, 160762, 160945, 161113, 190604, 190607, 200301, 210112, 240106, 240605, 240626, 240632, 240803, 240906, 241002, 241101, 241139, 241510, 241519, 241522, 241535, 241709, 241714, 242317, 242801, 243017, 243703, 243827, 243906, 243934, 243937, 243967, 244113, 244437, 244520, 244801, 244802, 244805, 244936, 245018, 245513, 245517, 245909, 245918, 246123, 246137, 246207                                                                                         |
|                                                                     | 3rd year         | 45/1012 ( 4.4%)  | 140804, 140812, 140901, 150160, 160128, 160312, 160314, 160762, 160916, 160945, 160955, 160961, 190206, 190633, 200702, 210110, 210511, 230402, 230715, 240103, 240126, 240523, 240605, 240632, 240636, 241103, 241301, 241418, 241420, 241546, 241714, 242801, 243315, 243501, 243703, 243934, 243937, 244113, 244520, 244802, 245018, 245030, 245517, 246123, 246137                                                                                                                                 |
|                                                                     | Overall          | 127/1452 ( 8.7%) | 120229, 120337, 120402, 140610, 140801, 140804, 140812, 140901, 140916, 141111, 141401, 150113, 150126, 150140, 150150, 150160, 150164, 160128, 160312, 160314, 160602, 160718, 160762, 160916, 160945, 160955, 160961, 161113, 180632, 180678, 190206, 190604, 190607, 190633, 200301, 200702, 210110, 210112, 210133, 210511, 230402, 230416, 230715, 240103, 240106, 240114, 240126, 240128, 240233, 240501,                                                                                        |

Table 14.3.1 / 10: Number of subjects with adverse events including subject identifier and year by treatment (FAS)  
 (cont.)

TREATMENT: LCS16

Primary system organ class

| Preferred term<br>MedDRA version 14.0 | YEAR OF<br>ONSET |  | N (%)           | subject identifier                                                                                                                                                                                                                                                                                                                                                                                                                                                                                                                                                                                                                                                                  |
|---------------------------------------|------------------|--|-----------------|-------------------------------------------------------------------------------------------------------------------------------------------------------------------------------------------------------------------------------------------------------------------------------------------------------------------------------------------------------------------------------------------------------------------------------------------------------------------------------------------------------------------------------------------------------------------------------------------------------------------------------------------------------------------------------------|
|                                       |                  |  |                 | 240506, 240522, 240523, 240605, 240621, 240624,<br>240626, 240632, 240636, 240708, 240803, 240906,<br>241002, 241008, 241022, 241101, 241103, 241139,<br>241301, 241418, 241420, 241503, 241510, 241519,<br>241522,<br>241535, 241537, 241546, 241709, 241714, 242317,<br>242801, 242817, 243017, 243032, 243034, 243315,<br>243406, 243501, 243703, 243827, 243906, 243934,<br>243937, 243956, 243966, 243967, 243977, 244113,<br>244120,<br>244133, 244303, 244437, 244520, 244716, 244801,<br>244802, 244805, 244916, 244922, 244926, 244935,<br>244936, 245002, 245013, 245018, 245030, 245513,<br>245517, 245704, 245909, 245918, 246113, 246123,<br>246137,<br>246146, 246207 |
| Vaginitis chlamydial                  | 1st year         |  | 1/1452 ( <0.1%) | 231010                                                                                                                                                                                                                                                                                                                                                                                                                                                                                                                                                                                                                                                                              |
|                                       | Overall          |  | 1/1452 ( <0.1%) | 231010                                                                                                                                                                                                                                                                                                                                                                                                                                                                                                                                                                                                                                                                              |
| Vaginitis gardnerella                 | 1st year         |  | 2/1452 ( 0.1%)  | 230609, 240708                                                                                                                                                                                                                                                                                                                                                                                                                                                                                                                                                                                                                                                                      |
|                                       | 2nd year         |  | 1/1206 ( <0.1%) | 200707                                                                                                                                                                                                                                                                                                                                                                                                                                                                                                                                                                                                                                                                              |
|                                       | 3rd year         |  | 1/1012 ( <0.1%) | 200302                                                                                                                                                                                                                                                                                                                                                                                                                                                                                                                                                                                                                                                                              |
|                                       | Overall          |  | 4/1452 ( 0.3%)  | 200302, 200707, 230609, 240708                                                                                                                                                                                                                                                                                                                                                                                                                                                                                                                                                                                                                                                      |
| Viral infection                       | 1st year         |  | 2/1452 ( 0.1%)  | 242801, 244516                                                                                                                                                                                                                                                                                                                                                                                                                                                                                                                                                                                                                                                                      |
|                                       | 2nd year         |  | 1/1206 ( <0.1%) | 242704                                                                                                                                                                                                                                                                                                                                                                                                                                                                                                                                                                                                                                                                              |
|                                       | Overall          |  | 3/1452 ( 0.2%)  | 242704, 242801, 244516                                                                                                                                                                                                                                                                                                                                                                                                                                                                                                                                                                                                                                                              |
| Viral pharyngitis                     | 1st year         |  | 1/1452 ( <0.1%) | 140812                                                                                                                                                                                                                                                                                                                                                                                                                                                                                                                                                                                                                                                                              |
|                                       | Overall          |  | 1/1452 ( <0.1%) | 140812                                                                                                                                                                                                                                                                                                                                                                                                                                                                                                                                                                                                                                                                              |



Table 14.3.1 / 10: Number of subjects with adverse events including subject identifier and year by treatment (FAS)  
 (cont.)

TREATMENT: LCS16

Primary system organ class

| Preferred term<br>MedDRA version 14.0   | YEAR OF<br>ONSET | N (%)           | subject identifier                                                                                             |
|-----------------------------------------|------------------|-----------------|----------------------------------------------------------------------------------------------------------------|
| Viral upper respiratory tract infection | 1st year         | 7/1452 ( 0.5%)  | 161401, 161402, 161404, 161415, 161430, 161432, 161434                                                         |
|                                         | 2nd year         | 9/1206 ( 0.7%)  | 161415, 161417, 161418, 161419, 161422, 161423, 161430, 161432, 243319                                         |
|                                         | 3rd year         | 3/1012 ( 0.3%)  | 161417, 161432, 242310                                                                                         |
|                                         | Overall          | 14/1452 ( 1.0%) | 161401, 161402, 161404, 161415, 161417, 161418, 161419, 161422, 161423, 161430, 161432, 161434, 242310, 243319 |
| Vulval abscess                          | 1st year         | 1/1452 (<0.1%)  | 243932                                                                                                         |
|                                         | Overall          | 1/1452 (<0.1%)  | 243932                                                                                                         |
| Vulvitis                                | 1st year         | 5/1452 ( 0.3%)  | 150139, 150160, 160324, 160602, 244106                                                                         |
|                                         | 2nd year         | 1/1206 (<0.1%)  | 120629                                                                                                         |
|                                         | 3rd year         | 1/1012 (<0.1%)  | 150116                                                                                                         |
|                                         | Overall          | 7/1452 ( 0.5%)  | 120629, 150116, 150139, 150160, 160324, 160602, 244106                                                         |

Table 14.3.1 / 10: Number of subjects with adverse events including subject identifier and year by treatment (FAS)  
 (cont.)

TREATMENT: LCS16

| Primary system organ class<br>Preferred term<br>MedDRA version 14.0 | YEAR OF<br>ONSET | N (%)           | subject identifier                                                                                                                                                                                                                                                                                                                                                                                                                                                                                                                                                                             |
|---------------------------------------------------------------------|------------------|-----------------|------------------------------------------------------------------------------------------------------------------------------------------------------------------------------------------------------------------------------------------------------------------------------------------------------------------------------------------------------------------------------------------------------------------------------------------------------------------------------------------------------------------------------------------------------------------------------------------------|
| Vulvovaginal candidiasis                                            | 1st year         | 39/1452 ( 2.7%) | 140223, 140801, 150137, 160128, 160316, 160324, 160326, 160332, 160438, 160602, 160608, 160907, 160912, 160969, 160972, 160987, 161201, 161536, 190227, 190408, 200701, 200702, 230106, 230121, 230213, 230516, 230918, 231004, 231010, 231011, 231110, 240506, 241537, 242707, 244525, 245002, 245030, 245526, 245927                                                                                                                                                                                                                                                                         |
|                                                                     | 2nd year         | 30/1206 ( 2.5%) | 140514, 140912, 160215, 160326, 160438, 160602, 160608, 160620, 160635, 160969, 160986, 160987, 161223, 161417, 161535, 190622, 200107, 200509, 200628, 230415, 230514, 230823, 231007, 231115, 243316, 244519, 244520, 245017, 245023, 245030                                                                                                                                                                                                                                                                                                                                                 |
|                                                                     | 3rd year         | 19/1012 ( 1.9%) | 140223, 140509, 141035, 160128, 160210, 160531, 160563, 160602, 160907, 160920, 160942, 160969, 160986, 160987, 161524, 190408, 190604, 231115, 243813                                                                                                                                                                                                                                                                                                                                                                                                                                         |
|                                                                     | Overall          | 72/1452 ( 5.0%) | 140223, 140509, 140514, 140801, 140912, 141035, 150137, 160128, 160210, 160215, 160316, 160324, 160326, 160332, 160438, 160531, 160563, 160602, 160608, 160620, 160635, 160907, 160912, 160920, 160942, 160969, 160972, 160986, 160987, 161201, 161223, 161417, 161524, 161535, 161536, 190227, 190408, 190604, 190622, 200107, 200509, 200628, 200701, 200702, 230106, 230121, 230213, 230415, 230514, 230516, 230823, 230918, 231004, 231007, 231010, 231011, 231110, 231115, 240506, 241537, 242707, 243316, 243813, 244519, 244520, 244525, 245002, 245017, 245023, 245030, 245526, 245927 |

Table 14.3.1 / 10: Number of subjects with adverse events including subject identifier and year by treatment (FAS)  
 (cont.)

TREATMENT: LCS16

Primary system organ class

| Preferred term<br>MedDRA version 14.0 | YEAR OF<br>ONSET | N (%)            | subject identifier                                                                                                                                                                                                                                                                                                                                                                                                                                                                                                                                                                                                      |
|---------------------------------------|------------------|------------------|-------------------------------------------------------------------------------------------------------------------------------------------------------------------------------------------------------------------------------------------------------------------------------------------------------------------------------------------------------------------------------------------------------------------------------------------------------------------------------------------------------------------------------------------------------------------------------------------------------------------------|
| Vulvovaginal mycotic infection        | 1st year         | 67/1452 ( 4.6%)  | 120308, 140112, 150103, 150113, 150115, 150120, 150126, 150131, 150137, 150146, 150157, 150164, 160503, 160526, 160529, 160533, 160540, 160634, 160707, 160714, 160718, 160727, 160737, 160745, 160748, 160755, 160761, 161008, 161311, 170104, 180660, 210110, 230306, 240603, 240605, 240636, 240905, 241155, 241301, 241310, 241417, 241508, 241546, 241726, 242324, 242904, 243008, 243024, 243025, 243301, 243504, 243507, 243518, 243703, 243707, 243963, 244106, 244123, 244128, 244418, 244435, 244446, 244505, 244614, 245409, 245416, 245927                                                                  |
|                                       | 2nd year         | 40/1206 ( 3.3%)  | 140611, 150103, 150154, 150157, 160529, 160531, 160532, 160540, 160702, 160716, 160760, 161008, 161016, 170602, 210132, 240355, 240636, 240840, 241029, 241139, 241310, 241417, 241726, 242324, 242501, 242502, 242918, 243301, 243306, 243615, 244202, 244429, 244435, 244520, 244801, 244936, 245513, 245517, 245522, 245918                                                                                                                                                                                                                                                                                          |
|                                       | 3rd year         | 31/1012 ( 3.1%)  | 141411, 150114, 150115, 150117, 150126, 150137, 150139, 150159, 150160, 160529, 160540, 160702, 160755, 160760, 240614, 240626, 240636, 240711, 240905, 241026, 241139, 241418, 241546, 241713, 242501, 243301, 243937, 244435, 244802, 244936, 245908                                                                                                                                                                                                                                                                                                                                                                  |
|                                       | Overall          | 110/1452 ( 7.6%) | 120308, 140112, 140611, 141411, 150103, 150113, 150114, 150115, 150117, 150120, 150126, 150131, 150137, 150139, 150146, 150154, 150157, 150159, 150160, 150164, 160503, 160526, 160529, 160531, 160532, 160533, 160540, 160634, 160702, 160707, 160714, 160716, 160718, 160727, 160737, 160745, 160748, 160755, 160760, 160761, 161008, 161016, 161311, 170104, 170602, 180660, 210110, 210132, 230306, 240355, 240603, 240605, 240614, 240626, 240636, 240711, 240840, 240905, 241026, 241029, 241139, 241155, 241301, 241310, 241417, 241418, 241508, 241546, 241713, 241726, 242324, 242501, 242502, 242904, 242918, |

Table 14.3.1 / 10: Number of subjects with adverse events including subject identifier and year by treatment (FAS)  
 (cont.)

TREATMENT: LCS16

| Primary system organ class<br>Preferred term<br>MedDRA version 14.0 | YEAR OF<br>ONSET | N (%)            | subject identifier                                                                                                                                                                                                                                                                                       |
|---------------------------------------------------------------------|------------------|------------------|----------------------------------------------------------------------------------------------------------------------------------------------------------------------------------------------------------------------------------------------------------------------------------------------------------|
|                                                                     |                  |                  | 243008, 243024, 243025, 243301, 243306, 243504,<br>243507, 243518, 243615, 243703, 243707, 243937,<br>243963, 244106, 244123, 244128, 244202, 244418,<br>244429, 244435, 244446, 244505, 244520, 244614,<br>244801,<br>244802, 244936, 245409, 245416, 245513, 245517,<br>245522, 245908, 245918, 245927 |
| Vulvovaginitis                                                      | 1st year         | 5/1452 ( 0.3%)   | 120402, 120603, 140801, 150204, 180334                                                                                                                                                                                                                                                                   |
|                                                                     | 2nd year         | 1/1206 (<0.1%)   | 160324                                                                                                                                                                                                                                                                                                   |
|                                                                     | 3rd year         | 2/1012 ( 0.2%)   | 160324, 241714                                                                                                                                                                                                                                                                                           |
|                                                                     | Overall          | 7/1452 ( 0.5%)   | 120402, 120603, 140801, 150204, 160324, 180334,<br>241714                                                                                                                                                                                                                                                |
| Vulvovaginitis chlamydial                                           | 2nd year         | 1/1206 (<0.1%)   | 245513                                                                                                                                                                                                                                                                                                   |
|                                                                     | Overall          | 1/1452 (<0.1%)   | 245513                                                                                                                                                                                                                                                                                                   |
| Vulvovaginitis streptococcal                                        | 1st year         | 1/1452 (<0.1%)   | 245023                                                                                                                                                                                                                                                                                                   |
|                                                                     | 3rd year         | 1/1012 (<0.1%)   | 244936                                                                                                                                                                                                                                                                                                   |
|                                                                     | Overall          | 2/1452 ( 0.1%)   | 244936, 245023                                                                                                                                                                                                                                                                                           |
| Vulvovaginitis trichomonal                                          | 1st year         | 2/1452 ( 0.1%)   | 246113, 246127                                                                                                                                                                                                                                                                                           |
|                                                                     | 2nd year         | 1/1206 (<0.1%)   | 243006                                                                                                                                                                                                                                                                                                   |
|                                                                     | 3rd year         | 1/1012 (<0.1%)   | 246134                                                                                                                                                                                                                                                                                                   |
|                                                                     | Overall          | 4/1452 ( 0.3%)   | 243006, 246113, 246127, 246134                                                                                                                                                                                                                                                                           |
| Wound infection                                                     | 1st year         | 1/1452 (<0.1%)   | 161118                                                                                                                                                                                                                                                                                                   |
|                                                                     | Overall          | 1/1452 (<0.1%)   | 161118                                                                                                                                                                                                                                                                                                   |
| Wound infection staphylococcal                                      | 3rd year         | 1/1012 (<0.1%)   | 230106                                                                                                                                                                                                                                                                                                   |
|                                                                     | Overall          | 1/1452 (<0.1%)   | 230106                                                                                                                                                                                                                                                                                                   |
| Injury, poisoning and procedural complications                      | 1st year         | 88/1452 ( 6.1%)  |                                                                                                                                                                                                                                                                                                          |
|                                                                     | 2nd year         | 29/1206 ( 2.4%)  |                                                                                                                                                                                                                                                                                                          |
|                                                                     | 3rd year         | 30/1012 ( 3.0%)  |                                                                                                                                                                                                                                                                                                          |
|                                                                     | Overall          | 133/1452 ( 9.2%) |                                                                                                                                                                                                                                                                                                          |

Table 14.3.1 / 10: Number of subjects with adverse events including subject identifier and year by treatment (FAS)  
(cont.)

TREATMENT: LCS16

| Primary system organ class<br>Preferred term<br>MedDRA version 14.0 | YEAR OF<br>ONSET | N (%)           | subject identifier                                             |
|---------------------------------------------------------------------|------------------|-----------------|----------------------------------------------------------------|
| Abdominal wound dehiscence                                          | 3rd year         | 1/1012 ( <0.1%) | 242321                                                         |
|                                                                     | Overall          | 1/1452 ( <0.1%) | 242321                                                         |
| Accident                                                            | 2nd year         | 1/1206 ( <0.1%) | 200701                                                         |
|                                                                     | Overall          | 1/1452 ( <0.1%) | 200701                                                         |
| Animal bite                                                         | 1st year         | 1/1452 ( <0.1%) | 200702                                                         |
|                                                                     | 2nd year         | 1/1206 ( <0.1%) | 200702                                                         |
|                                                                     | 3rd year         | 1/1012 ( <0.1%) | 161430                                                         |
|                                                                     | Overall          | 2/1452 ( 0.1%)  | 161430, 200702                                                 |
| Ankle fracture                                                      | 1st year         | 1/1452 ( <0.1%) | 161302                                                         |
|                                                                     | 2nd year         | 1/1206 ( <0.1%) | 140702                                                         |
|                                                                     | Overall          | 2/1452 ( 0.1%)  | 140702, 161302                                                 |
| Arthropod bite                                                      | 1st year         | 2/1452 ( 0.1%)  | 160611, 160907                                                 |
|                                                                     | Overall          | 2/1452 ( 0.1%)  | 160611, 160907                                                 |
| Arthropod sting                                                     | 1st year         | 1/1452 ( <0.1%) | 161524                                                         |
|                                                                     | 3rd year         | 1/1012 ( <0.1%) | 120612                                                         |
|                                                                     | Overall          | 2/1452 ( 0.1%)  | 120612, 161524                                                 |
| Back injury                                                         | 2nd year         | 1/1206 ( <0.1%) | 244305                                                         |
|                                                                     | Overall          | 1/1452 ( <0.1%) | 244305                                                         |
| Burns second degree                                                 | 2nd year         | 1/1206 ( <0.1%) | 246127                                                         |
|                                                                     | Overall          | 1/1452 ( <0.1%) | 246127                                                         |
| Cartilage injury                                                    | 2nd year         | 1/1206 ( <0.1%) | 241117                                                         |
|                                                                     | Overall          | 1/1452 ( <0.1%) | 241117                                                         |
| Concussion                                                          | 1st year         | 6/1452 ( 0.4%)  | 140601, 140810, 161107, 200225, 230807, 241301                 |
|                                                                     | 2nd year         | 1/1206 ( <0.1%) | 160428                                                         |
|                                                                     | 3rd year         | 1/1012 ( <0.1%) | 161404                                                         |
|                                                                     | Overall          | 8/1452 ( 0.6%)  | 140601, 140810, 160428, 161107, 161404, 200225, 230807, 241301 |

Table 14.3.1 / 10: Number of subjects with adverse events including subject identifier and year by treatment (FAS)  
 (cont.)

TREATMENT: LCS16

| Primary system organ class<br>Preferred term<br>MedDRA version 14.0 | YEAR OF<br>ONSET | N (%)           | subject identifier                     |
|---------------------------------------------------------------------|------------------|-----------------|----------------------------------------|
| Contusion                                                           | 1st year         | 2/1452 ( 0.1%)  | 230514, 240501                         |
|                                                                     | 2nd year         | 2/1206 ( 0.2%)  | 161125, 241418                         |
|                                                                     | 3rd year         | 1/1012 ( <0.1%) | 200605                                 |
|                                                                     | Overall          | 5/1452 ( 0.3%)  | 161125, 200605, 230514, 240501, 241418 |
| Epicondylitis                                                       | 1st year         | 3/1452 ( 0.2%)  | 141012, 161529, 161535                 |
|                                                                     | 2nd year         | 1/1206 ( <0.1%) | 200525                                 |
|                                                                     | Overall          | 4/1452 ( 0.3%)  | 141012, 161529, 161535, 200525         |
| Excoriation                                                         | 1st year         | 1/1452 ( <0.1%) | 246001                                 |
|                                                                     | Overall          | 1/1452 ( <0.1%) | 246001                                 |
| Eye injury                                                          | 1st year         | 1/1452 ( <0.1%) | 243216                                 |
|                                                                     | Overall          | 1/1452 ( <0.1%) | 243216                                 |
| Fall                                                                | 3rd year         | 1/1012 ( <0.1%) | 190611                                 |
|                                                                     | Overall          | 1/1452 ( <0.1%) | 190611                                 |
| Foot fracture                                                       | 1st year         | 3/1452 ( 0.2%)  | 140225, 180659, 242317                 |
|                                                                     | Overall          | 3/1452 ( 0.2%)  | 140225, 180659, 242317                 |
| Hand fracture                                                       | 2nd year         | 1/1206 ( <0.1%) | 161309                                 |
|                                                                     | 3rd year         | 2/1012 ( 0.2%)  | 160312, 160737                         |
|                                                                     | Overall          | 3/1452 ( 0.2%)  | 160312, 160737, 161309                 |
| Head injury                                                         | 3rd year         | 1/1012 ( <0.1%) | 140804                                 |
|                                                                     | Overall          | 1/1452 ( <0.1%) | 140804                                 |
| Humerus fracture                                                    | 3rd year         | 1/1012 ( <0.1%) | 161536                                 |
|                                                                     | Overall          | 1/1452 ( <0.1%) | 161536                                 |
| Injury                                                              | 1st year         | 1/1452 ( <0.1%) | 140919                                 |
|                                                                     | Overall          | 1/1452 ( <0.1%) | 140919                                 |
| Joint dislocation                                                   | 1st year         | 1/1452 ( <0.1%) | 241170                                 |
|                                                                     | Overall          | 1/1452 ( <0.1%) | 241170                                 |

Table 14.3.1 / 10: Number of subjects with adverse events including subject identifier and year by treatment (FAS)  
(cont.)

TREATMENT: LCS16

| Primary system organ class<br>Preferred term<br>MedDRA version 14.0 | YEAR OF<br>ONSET | N (%)           | subject identifier                                                             |
|---------------------------------------------------------------------|------------------|-----------------|--------------------------------------------------------------------------------|
| Joint injury                                                        | 1st year         | 2/1452 ( 0.1%)  | 140915, 244517                                                                 |
|                                                                     | 2nd year         | 1/1206 ( <0.1%) | 161107                                                                         |
|                                                                     | 3rd year         | 3/1012 ( 0.3%)  | 120607, 161404, 161430                                                         |
|                                                                     | Overall          | 6/1452 ( 0.4%)  | 120607, 140915, 161107, 161404, 161430, 244517                                 |
| Joint sprain                                                        | 1st year         | 3/1452 ( 0.2%)  | 160611, 161306, 245806                                                         |
|                                                                     | 3rd year         | 3/1012 ( 0.3%)  | 141030, 150165, 240708                                                         |
|                                                                     | Overall          | 6/1452 ( 0.4%)  | 141030, 150165, 160611, 161306, 240708, 245806                                 |
| Laceration                                                          | 1st year         | 2/1452 ( 0.1%)  | 241206, 243215                                                                 |
|                                                                     | Overall          | 2/1452 ( 0.1%)  | 241206, 243215                                                                 |
| Ligament rupture                                                    | 1st year         | 1/1452 ( <0.1%) | 243928                                                                         |
|                                                                     | Overall          | 1/1452 ( <0.1%) | 243928                                                                         |
| Ligament sprain                                                     | 2nd year         | 1/1206 ( <0.1%) | 161535                                                                         |
|                                                                     | Overall          | 1/1452 ( <0.1%) | 161535                                                                         |
| Limb injury                                                         | 1st year         | 3/1452 ( 0.2%)  | 161422, 161432, 241731                                                         |
|                                                                     | 3rd year         | 1/1012 ( <0.1%) | 161417                                                                         |
|                                                                     | Overall          | 4/1452 ( 0.3%)  | 161417, 161422, 161432, 241731                                                 |
| Lumbar vertebral fracture                                           | 3rd year         | 1/1012 ( <0.1%) | 140805                                                                         |
|                                                                     | Overall          | 1/1452 ( <0.1%) | 140805                                                                         |
| Muscle injury                                                       | 1st year         | 1/1452 ( <0.1%) | 140211                                                                         |
|                                                                     | 2nd year         | 1/1206 ( <0.1%) | 140106                                                                         |
|                                                                     | Overall          | 2/1452 ( 0.1%)  | 140106, 140211                                                                 |
| Muscle rupture                                                      | 2nd year         | 1/1206 ( <0.1%) | 245905                                                                         |
|                                                                     | Overall          | 1/1452 ( <0.1%) | 245905                                                                         |
| Muscle strain                                                       | 1st year         | 5/1452 ( 0.3%)  | 140810, 160737, 161430, 161529, 241722                                         |
|                                                                     | 2nd year         | 1/1206 ( <0.1%) | 241418                                                                         |
|                                                                     | 3rd year         | 4/1012 ( 0.4%)  | 140804, 240358, 240708, 242803                                                 |
|                                                                     | Overall          | 10/1452 ( 0.7%) | 140804, 140810, 160737, 161430, 161529, 240358, 240708, 241418, 241722, 242803 |

Table 14.3.1 / 10: Number of subjects with adverse events including subject identifier and year by treatment (FAS)  
(cont.)

TREATMENT: LCS16

| Primary system organ class<br>Preferred term<br>MedDRA version 14.0 | YEAR OF<br>ONSET | N (%)           | subject identifier                                                                                                                                                                                                                                                                                                                                                                                                                             |
|---------------------------------------------------------------------|------------------|-----------------|------------------------------------------------------------------------------------------------------------------------------------------------------------------------------------------------------------------------------------------------------------------------------------------------------------------------------------------------------------------------------------------------------------------------------------------------|
| Post concussion syndrome                                            | 2nd year         | 1/1206 ( <0.1%) | 140810                                                                                                                                                                                                                                                                                                                                                                                                                                         |
|                                                                     | Overall          | 1/1452 ( <0.1%) | 140810                                                                                                                                                                                                                                                                                                                                                                                                                                         |
| Post procedural haemorrhage                                         | 1st year         | 1/1452 ( <0.1%) | 160706                                                                                                                                                                                                                                                                                                                                                                                                                                         |
|                                                                     | 3rd year         | 1/1012 ( <0.1%) | 200403                                                                                                                                                                                                                                                                                                                                                                                                                                         |
|                                                                     | Overall          | 2/1452 ( 0.1%)  | 160706, 200403                                                                                                                                                                                                                                                                                                                                                                                                                                 |
| Post-traumatic pain                                                 | 1st year         | 3/1452 ( 0.2%)  | 161314, 170703, 240333                                                                                                                                                                                                                                                                                                                                                                                                                         |
|                                                                     | 2nd year         | 1/1206 ( <0.1%) | 200701                                                                                                                                                                                                                                                                                                                                                                                                                                         |
|                                                                     | Overall          | 4/1452 ( 0.3%)  | 161314, 170703, 200701, 240333                                                                                                                                                                                                                                                                                                                                                                                                                 |
| Postoperative ileus                                                 | 3rd year         | 1/1012 ( <0.1%) | 242321                                                                                                                                                                                                                                                                                                                                                                                                                                         |
|                                                                     | Overall          | 1/1452 ( <0.1%) | 242321                                                                                                                                                                                                                                                                                                                                                                                                                                         |
| Procedural pain                                                     | 1st year         | 43/1452 ( 3.0%) | 141103, 160206, 160546, 160602, 160707, 160709, 160714, 160727, 160731, 160748, 160750, 160762, 161103, 161107, 161116, 161119, 161123, 161131, 161302, 161309, 161311, 161314, 161321, 170703, 200510, 200607, 200617, 210121, 210123, 230106, 230207, 230612, 230614, 240118, 240515, 240522, 240523, 241114, 241126, 241522, 241535, 242911, 244410                                                                                         |
|                                                                     | 2nd year         | 6/1206 ( 0.5%)  | 160556, 161131, 241603, 242303, 243205, 245517                                                                                                                                                                                                                                                                                                                                                                                                 |
|                                                                     | 3rd year         | 7/1012 ( 0.7%)  | 160629, 200510, 240333, 240905, 242321, 243707, 245909                                                                                                                                                                                                                                                                                                                                                                                         |
|                                                                     | Overall          | 54/1452 ( 3.7%) | 141103, 160206, 160546, 160556, 160602, 160629, 160707, 160709, 160714, 160727, 160731, 160748, 160750, 160762, 161103, 161107, 161116, 161119, 161123, 161131, 161302, 161309, 161311, 161314, 161321, 170703, 200510, 200607, 200617, 210121, 210123, 230106, 230207, 230612, 230614, 240118, 240333, 240515, 240522, 240523, 240905, 241114, 241126, 241522, 241535, 241603, 242303, 242321, 242911, 243205, 243707, 244410, 245517, 245909 |
| Radius fracture                                                     | 1st year         | 1/1452 ( <0.1%) | 242702                                                                                                                                                                                                                                                                                                                                                                                                                                         |
|                                                                     | Overall          | 1/1452 ( <0.1%) | 242702                                                                                                                                                                                                                                                                                                                                                                                                                                         |



Table 14.3.1 / 10: Number of subjects with adverse events including subject identifier and year by treatment (FAS)  
 (cont.)

TREATMENT: LCS16

| Primary system organ class<br>Preferred term<br>MedDRA version 14.0 | YEAR OF<br>ONSET | N (%)           | subject identifier     |
|---------------------------------------------------------------------|------------------|-----------------|------------------------|
| Rib fracture                                                        | 1st year         | 1/1452 ( <0.1%) | 161019                 |
|                                                                     | 3rd year         | 1/1012 ( <0.1%) | 170701                 |
|                                                                     | Overall          | 2/1452 ( 0.1%)  | 161019, 170701         |
| Road traffic accident                                               | 3rd year         | 2/1012 ( 0.2%)  | 240358, 240708         |
|                                                                     | Overall          | 2/1452 ( 0.1%)  | 240358, 240708         |
| Skeletal injury                                                     | 3rd year         | 1/1012 ( <0.1%) | 240708                 |
|                                                                     | Overall          | 1/1452 ( <0.1%) | 240708                 |
| Skin injury                                                         | 2nd year         | 1/1206 ( <0.1%) | 161401                 |
|                                                                     | Overall          | 1/1452 ( <0.1%) | 161401                 |
| Spinal column injury                                                | 1st year         | 2/1452 ( 0.1%)  | 140901, 150126         |
|                                                                     | Overall          | 2/1452 ( 0.1%)  | 140901, 150126         |
| Stress fracture                                                     | 2nd year         | 1/1206 ( <0.1%) | 160737                 |
|                                                                     | Overall          | 1/1452 ( <0.1%) | 160737                 |
| Tendon injury                                                       | 1st year         | 1/1452 ( <0.1%) | 243911                 |
|                                                                     | Overall          | 1/1452 ( <0.1%) | 243911                 |
| Tendon rupture                                                      | 1st year         | 1/1452 ( <0.1%) | 161223                 |
|                                                                     | Overall          | 1/1452 ( <0.1%) | 161223                 |
| Thermal burn                                                        | 2nd year         | 1/1206 ( <0.1%) | 161306                 |
|                                                                     | 3rd year         | 2/1012 ( 0.2%)  | 240708, 242104         |
|                                                                     | Overall          | 3/1452 ( 0.2%)  | 161306, 240708, 242104 |
| Tibia fracture                                                      | 2nd year         | 1/1206 ( <0.1%) | 161107                 |
|                                                                     | Overall          | 1/1452 ( <0.1%) | 161107                 |
| Upper limb fracture                                                 | 2nd year         | 1/1206 ( <0.1%) | 161536                 |
|                                                                     | 3rd year         | 1/1012 ( <0.1%) | 230119                 |
|                                                                     | Overall          | 2/1452 ( 0.1%)  | 161536, 230119         |

Table 14.3.1 / 10: Number of subjects with adverse events including subject identifier and year by treatment (FAS)  
 (cont.)

TREATMENT: LCS16

| Primary system organ class<br>Preferred term<br>MedDRA version 14.0 | YEAR OF<br>ONSET | N (%)             | subject identifier                                                                |
|---------------------------------------------------------------------|------------------|-------------------|-----------------------------------------------------------------------------------|
| Vulval laceration                                                   | 3rd year         | 1/1012 ( <0.1%)   | 245806                                                                            |
|                                                                     | Overall          | 1/1452 ( <0.1%)   | 245806                                                                            |
| Whiplash injury                                                     | 1st year         | 2/1452 ( 0.1%)    | 140601, 243932                                                                    |
|                                                                     | 2nd year         | 2/1206 ( 0.2%)    | 160314, 244315                                                                    |
|                                                                     | 3rd year         | 1/1012 ( <0.1%)   | 246131                                                                            |
|                                                                     | Overall          | 5/1452 ( 0.3%)    | 140601, 160314, 243932, 244315, 246131                                            |
| Wrist fracture                                                      | 1st year         | 1/1452 ( <0.1%)   | 120603                                                                            |
|                                                                     | 2nd year         | 1/1206 ( <0.1%)   | 240805                                                                            |
|                                                                     | Overall          | 2/1452 ( 0.1%)    | 120603, 240805                                                                    |
| Investigations                                                      | 1st year         | 64/1452 ( 4.4%)   |                                                                                   |
|                                                                     | 2nd year         | 42/1206 ( 3.5%)   |                                                                                   |
|                                                                     | 3rd year         | 60/1012 ( 5.9%)   |                                                                                   |
|                                                                     | Overall          | 158/1452 ( 10.9%) |                                                                                   |
| Alanine aminotransferase increased                                  | 1st year         | 1/1452 ( <0.1%)   | 245517                                                                            |
|                                                                     | 2nd year         | 1/1206 ( <0.1%)   | 230118                                                                            |
|                                                                     | 3rd year         | 8/1012 ( 0.8%)    | 120232, 150139, 150164, 160526, 161118, 161314,<br>243977, 244317                 |
|                                                                     | Overall          | 10/1452 ( 0.7%)   | 120232, 150139, 150164, 160526, 161118, 161314,<br>230118, 243977, 244317, 245517 |
| Aspartate aminotransferase increased                                | 2nd year         | 1/1206 ( <0.1%)   | 230118                                                                            |
|                                                                     | 3rd year         | 3/1012 ( 0.3%)    | 161314, 243977, 244317                                                            |
|                                                                     | Overall          | 4/1452 ( 0.3%)    | 161314, 230118, 243977, 244317                                                    |
| Blood amylase increased                                             | 1st year         | 1/1452 ( <0.1%)   | 180663                                                                            |
|                                                                     | Overall          | 1/1452 ( <0.1%)   | 180663                                                                            |
| Blood cholesterol increased                                         | 3rd year         | 1/1012 ( <0.1%)   | 160417                                                                            |
|                                                                     | Overall          | 1/1452 ( <0.1%)   | 160417                                                                            |
| Blood iron decreased                                                | 1st year         | 1/1452 ( <0.1%)   | 180663                                                                            |
|                                                                     | Overall          | 1/1452 ( <0.1%)   | 180663                                                                            |

Table 14.3.1 / 10: Number of subjects with adverse events including subject identifier and year by treatment (FAS)  
 (cont.)

TREATMENT: LCS16

| Primary system organ class<br>Preferred term<br>MedDRA version 14.0 | YEAR OF<br>ONSET | N (%)           | subject identifier                                                                                           |
|---------------------------------------------------------------------|------------------|-----------------|--------------------------------------------------------------------------------------------------------------|
| Blood potassium increased                                           | 1st year         | 1/1452 ( <0.1%) | 200236                                                                                                       |
|                                                                     | Overall          | 1/1452 ( <0.1%) | 200236                                                                                                       |
| Blood pressure diastolic increased                                  | 1st year         | 1/1452 ( <0.1%) | 241501                                                                                                       |
|                                                                     | Overall          | 1/1452 ( <0.1%) | 241501                                                                                                       |
| Blood pressure increased                                            | 3rd year         | 1/1012 ( <0.1%) | 120404                                                                                                       |
|                                                                     | Overall          | 1/1452 ( <0.1%) | 120404                                                                                                       |
| Blood pressure systolic increased                                   | 2nd year         | 1/1206 ( <0.1%) | 231104                                                                                                       |
|                                                                     | Overall          | 1/1452 ( <0.1%) | 231104                                                                                                       |
| Blood triglycerides increased                                       | 1st year         | 1/1452 ( <0.1%) | 190227                                                                                                       |
|                                                                     | 3rd year         | 4/1012 ( 0.4%)  | 120333, 141111, 180434, 244305                                                                               |
|                                                                     | Overall          | 5/1452 ( 0.3%)  | 120333, 141111, 180434, 190227, 244305                                                                       |
| Blood urine present                                                 | 3rd year         | 1/1012 ( <0.1%) | 161320                                                                                                       |
|                                                                     | Overall          | 1/1452 ( <0.1%) | 161320                                                                                                       |
| Chlamydia test positive                                             | 2nd year         | 1/1206 ( <0.1%) | 241418                                                                                                       |
|                                                                     | Overall          | 1/1452 ( <0.1%) | 241418                                                                                                       |
| Gamma-glutamyltransferase increased                                 | 1st year         | 2/1452 ( 0.1%)  | 243824, 245517                                                                                               |
|                                                                     | 2nd year         | 1/1206 ( <0.1%) | 230118                                                                                                       |
|                                                                     | 3rd year         | 10/1012 ( 1.0%) | 120232, 150126, 150139, 150164, 161306, 190142,<br>243518, 243833, 245407, 245507                            |
|                                                                     | Overall          | 13/1452 ( 0.9%) | 120232, 150126, 150139, 150164, 161306, 190142,<br>230118, 243518, 243824, 243833, 245407, 245507,<br>245517 |
| Gastric pH decreased                                                | 2nd year         | 1/1206 ( <0.1%) | 243928                                                                                                       |
|                                                                     | Overall          | 1/1452 ( <0.1%) | 243928                                                                                                       |
| Glucose urine present                                               | 3rd year         | 1/1012 ( <0.1%) | 244305                                                                                                       |
|                                                                     | Overall          | 1/1452 ( <0.1%) | 244305                                                                                                       |
| Haematocrit decreased                                               | 2nd year         | 1/1206 ( <0.1%) | 244808                                                                                                       |
|                                                                     | Overall          | 1/1452 ( <0.1%) | 244808                                                                                                       |

Table 14.3.1 / 10: Number of subjects with adverse events including subject identifier and year by treatment (FAS)  
 (cont.)

TREATMENT: LCS16

| Primary system organ class<br>Preferred term<br>MedDRA version 14.0 | YEAR OF<br>ONSET | N (%)           | subject identifier                             |
|---------------------------------------------------------------------|------------------|-----------------|------------------------------------------------|
| Haematocrit increased                                               | 3rd year         | 2/1012 ( 0.2%)  | 244416, 245522                                 |
|                                                                     | Overall          | 2/1452 ( 0.1%)  | 244416, 245522                                 |
| Haemoglobin decreased                                               | 2nd year         | 2/1206 ( 0.2%)  | 160546, 244808                                 |
|                                                                     | 3rd year         | 3/1012 ( 0.3%)  | 150131, 150141, 242321                         |
|                                                                     | Overall          | 5/1452 ( 0.3%)  | 150131, 150141, 160546, 242321, 244808         |
| Heart rate increased                                                | 1st year         | 1/1452 ( <0.1%) | 241401                                         |
|                                                                     | Overall          | 1/1452 ( <0.1%) | 241401                                         |
| Hepatic enzyme increased                                            | 1st year         | 1/1452 ( <0.1%) | 245703                                         |
|                                                                     | Overall          | 1/1452 ( <0.1%) | 245703                                         |
| High density lipoprotein decreased                                  | 1st year         | 1/1452 ( <0.1%) | 190227                                         |
|                                                                     | 3rd year         | 5/1012 ( 0.5%)  | 150117, 150137, 150164, 160417, 190142         |
|                                                                     | Overall          | 6/1452 ( 0.4%)  | 150117, 150137, 150164, 160417, 190142, 190227 |
| High density lipoprotein increased                                  | 3rd year         | 1/1012 ( <0.1%) | 150140                                         |
|                                                                     | Overall          | 1/1452 ( <0.1%) | 150140                                         |
| Human papilloma virus test positive                                 | 1st year         | 2/1452 ( 0.1%)  | 240645, 243963                                 |
|                                                                     | 2nd year         | 1/1206 ( <0.1%) | 200235                                         |
|                                                                     | 3rd year         | 2/1012 ( 0.2%)  | 243017, 243401                                 |
|                                                                     | Overall          | 5/1452 ( 0.3%)  | 200235, 240645, 243017, 243401, 243963         |
| Liver function test abnormal                                        | 1st year         | 1/1452 ( <0.1%) | 243217                                         |
|                                                                     | 3rd year         | 1/1012 ( <0.1%) | 244424                                         |
|                                                                     | Overall          | 2/1452 ( 0.1%)  | 243217, 244424                                 |
| Low density lipoprotein increased                                   | 1st year         | 1/1452 ( <0.1%) | 190627                                         |
|                                                                     | 3rd year         | 1/1012 ( <0.1%) | 160417                                         |
|                                                                     | Overall          | 2/1452 ( 0.1%)  | 160417, 190627                                 |
| Platelet count decreased                                            | 3rd year         | 3/1012 ( 0.3%)  | 160563, 241140, 244305                         |
|                                                                     | Overall          | 3/1452 ( 0.2%)  | 160563, 241140, 244305                         |
| Protein total decreased                                             | 3rd year         | 1/1012 ( <0.1%) | 241138                                         |
|                                                                     | Overall          | 1/1452 ( <0.1%) | 241138                                         |

Table 14.3.1 / 10: Number of subjects with adverse events including subject identifier and year by treatment (FAS)  
(cont.)

TREATMENT: LCS16

| Primary system organ class<br>Preferred term<br>MedDRA version 14.0 | YEAR OF<br>ONSET | N (%)           | subject identifier                                                                                                                                                                                                             |
|---------------------------------------------------------------------|------------------|-----------------|--------------------------------------------------------------------------------------------------------------------------------------------------------------------------------------------------------------------------------|
| Protein urine present                                               | 3rd year         | 1/1012 ( <0.1%) | 241173                                                                                                                                                                                                                         |
|                                                                     | Overall          | 1/1452 ( <0.1%) | 241173                                                                                                                                                                                                                         |
| Red blood cell count decreased                                      | 2nd year         | 1/1206 ( <0.1%) | 244808                                                                                                                                                                                                                         |
|                                                                     | 3rd year         | 1/1012 ( <0.1%) | 150157                                                                                                                                                                                                                         |
|                                                                     | Overall          | 2/1452 ( 0.1%)  | 150157, 244808                                                                                                                                                                                                                 |
| Simplex virus test positive                                         | 1st year         | 1/1452 ( <0.1%) | 243934                                                                                                                                                                                                                         |
|                                                                     | Overall          | 1/1452 ( <0.1%) | 243934                                                                                                                                                                                                                         |
| Smear cervix abnormal                                               | 1st year         | 7/1452 ( 0.5%)  | 140712, 160718, 180438, 180629, 241179, 242502, 246134                                                                                                                                                                         |
|                                                                     | 2nd year         | 9/1206 ( 0.7%)  | 150115, 150160, 160202, 180660, 200621, 200907, 240523, 241608, 245429                                                                                                                                                         |
|                                                                     | 3rd year         | 12/1012 ( 1.2%) | 180810, 200103, 200203, 200212, 200231, 200235, 200403, 200411, 240506, 240724, 240815, 244501                                                                                                                                 |
|                                                                     | Overall          | 28/1452 ( 1.9%) | 140712, 150115, 150160, 160202, 160718, 180438, 180629, 180660, 180810, 200103, 200203, 200212, 200231, 200235, 200403, 200411, 200621, 200907, 240506, 240523, 240724, 240815, 241179, 241608, 242502, 244501, 245429, 246134 |
| Transaminases increased                                             | 2nd year         | 1/1206 ( <0.1%) | 160513                                                                                                                                                                                                                         |
|                                                                     | Overall          | 1/1452 ( <0.1%) | 160513                                                                                                                                                                                                                         |
| Urine leukocyte esterase positive                                   | 1st year         | 1/1452 ( <0.1%) | 241189                                                                                                                                                                                                                         |
|                                                                     | Overall          | 1/1452 ( <0.1%) | 241189                                                                                                                                                                                                                         |
| Vitamin D decreased                                                 | 3rd year         | 1/1012 ( <0.1%) | 241603                                                                                                                                                                                                                         |
|                                                                     | Overall          | 1/1452 ( <0.1%) | 241603                                                                                                                                                                                                                         |
| Weight decreased                                                    | 1st year         | 3/1452 ( 0.2%)  | 120635, 210110, 246207                                                                                                                                                                                                         |
|                                                                     | 2nd year         | 3/1206 ( 0.2%)  | 140205, 200711, 242505                                                                                                                                                                                                         |
|                                                                     | 3rd year         | 1/1012 ( <0.1%) | 200902                                                                                                                                                                                                                         |
|                                                                     | Overall          | 7/1452 ( 0.5%)  | 120635, 140205, 200711, 200902, 210110, 242505, 246207                                                                                                                                                                         |

Table 14.3.1 / 10: Number of subjects with adverse events including subject identifier and year by treatment (FAS)  
(cont.)

TREATMENT: LCS16

| Primary system organ class<br>Preferred term<br>MedDRA version 14.0 | YEAR OF<br>ONSET | N (%)           | subject identifier                                                                                                                                                                                                                                                                                                                                                                                                                                                                                                                                                                                 |
|---------------------------------------------------------------------|------------------|-----------------|----------------------------------------------------------------------------------------------------------------------------------------------------------------------------------------------------------------------------------------------------------------------------------------------------------------------------------------------------------------------------------------------------------------------------------------------------------------------------------------------------------------------------------------------------------------------------------------------------|
| Weight increased                                                    | 1st year         | 41/1452 ( 2.8%) | 120303, 120324, 140112, 140120, 141410, 141414,<br>150113, 150131, 160621, 160627, 160728, 160748,<br>160762, 160802, 160902, 160958, 161214, 161216,<br>180429, 230516, 230910, 230911, 231013, 240802,<br>240823,<br>241103, 241137, 241155, 241189, 241430, 241503,<br>242702, 243301, 243901, 243967, 244110, 244113,<br>244433, 244922, 245513, 246219                                                                                                                                                                                                                                        |
|                                                                     | 2nd year         | 22/1206 ( 1.8%) | 120222, 120337, 141411, 150154, 160428, 230215,<br>230220, 230404, 240303, 240325, 240506, 241002,<br>241109, 241158, 241176, 241403, 241535, 241537,<br>242502, 245522, 245602, 246207                                                                                                                                                                                                                                                                                                                                                                                                            |
|                                                                     | 3rd year         | 5/1012 ( 0.5%)  | 241194, 243017, 243928, 243966, 244916                                                                                                                                                                                                                                                                                                                                                                                                                                                                                                                                                             |
|                                                                     | Overall          | 68/1452 ( 4.7%) | 120222, 120303, 120324, 120337, 140112, 140120,<br>141410, 141411, 141414, 150113, 150131, 150154,<br>160428, 160621, 160627, 160728, 160748, 160762,<br>160802, 160902, 160958, 161214, 161216, 180429,<br>230215,<br>230220, 230404, 230516, 230910, 230911, 231013,<br>240303, 240325, 240506, 240802, 240823, 241002,<br>241103, 241109, 241137, 241155, 241158, 241176,<br>241189, 241194, 241403, 241430, 241503, 241535,<br>241537,<br>242502, 242702, 243017, 243301, 243901, 243928,<br>243966, 243967, 244110, 244113, 244433, 244916,<br>244922, 245513, 245522, 245602, 246207, 246219 |
| White blood cell count decreased                                    | 3rd year         | 2/1012 ( 0.2%)  | 180407, 244429                                                                                                                                                                                                                                                                                                                                                                                                                                                                                                                                                                                     |
|                                                                     | Overall          | 2/1452 ( 0.1%)  | 180407, 244429                                                                                                                                                                                                                                                                                                                                                                                                                                                                                                                                                                                     |
| White blood cell count increased                                    | 3rd year         | 2/1012 ( 0.2%)  | 160428, 190405                                                                                                                                                                                                                                                                                                                                                                                                                                                                                                                                                                                     |
|                                                                     | Overall          | 2/1452 ( 0.1%)  | 160428, 190405                                                                                                                                                                                                                                                                                                                                                                                                                                                                                                                                                                                     |
| White blood cells urine positive                                    | 3rd year         | 2/1012 ( 0.2%)  | 241140, 241173                                                                                                                                                                                                                                                                                                                                                                                                                                                                                                                                                                                     |
|                                                                     | Overall          | 2/1452 ( 0.1%)  | 241140, 241173                                                                                                                                                                                                                                                                                                                                                                                                                                                                                                                                                                                     |
| Metabolism and nutrition disorders                                  | 1st year         | 11/1452 ( 0.8%) |                                                                                                                                                                                                                                                                                                                                                                                                                                                                                                                                                                                                    |
|                                                                     | 2nd year         | 4/1206 ( 0.3%)  |                                                                                                                                                                                                                                                                                                                                                                                                                                                                                                                                                                                                    |
|                                                                     | 3rd year         | 3/1012 ( 0.3%)  |                                                                                                                                                                                                                                                                                                                                                                                                                                                                                                                                                                                                    |
|                                                                     | Overall          | 17/1452 ( 1.2%) |                                                                                                                                                                                                                                                                                                                                                                                                                                                                                                                                                                                                    |

Table 14.3.1 / 10: Number of subjects with adverse events including subject identifier and year by treatment (FAS)  
 (cont.)

TREATMENT: LCS16

| Primary system organ class<br>Preferred term<br>MedDRA version 14.0 | YEAR OF<br>ONSET | N (%)           | subject identifier |
|---------------------------------------------------------------------|------------------|-----------------|--------------------|
| Abnormal loss of weight                                             | 1st year         | 1/1452 ( <0.1%) | 141413             |
|                                                                     | Overall          | 1/1452 ( <0.1%) | 141413             |
| Abnormal weight gain                                                | 1st year         | 1/1452 ( <0.1%) | 240614             |
|                                                                     | Overall          | 1/1452 ( <0.1%) | 240614             |
| Decreased appetite                                                  | 1st year         | 1/1452 ( <0.1%) | 140810             |
|                                                                     | Overall          | 1/1452 ( <0.1%) | 140810             |
| Dehydration                                                         | 1st year         | 1/1452 ( <0.1%) | 245505             |
|                                                                     | 3rd year         | 1/1012 ( <0.1%) | 242918             |
|                                                                     | Overall          | 2/1452 ( 0.1%)  | 242918, 245505     |
| Diabetic ketoacidosis                                               | 2nd year         | 1/1206 ( <0.1%) | 141413             |
|                                                                     | Overall          | 1/1452 ( <0.1%) | 141413             |
| Dyslipidaemia                                                       | 3rd year         | 1/1012 ( <0.1%) | 150122             |
|                                                                     | Overall          | 1/1452 ( <0.1%) | 150122             |
| Fluid retention                                                     | 1st year         | 2/1452 ( 0.1%)  | 210413, 230315     |
|                                                                     | Overall          | 2/1452 ( 0.1%)  | 210413, 230315     |
| Increased appetite                                                  | 1st year         | 2/1452 ( 0.1%)  | 210110, 244113     |
|                                                                     | Overall          | 2/1452 ( 0.1%)  | 210110, 244113     |
| Insulin resistance                                                  | 2nd year         | 1/1206 ( <0.1%) | 150154             |
|                                                                     | Overall          | 1/1452 ( <0.1%) | 150154             |
| Obesity                                                             | 1st year         | 1/1452 ( <0.1%) | 244410             |
|                                                                     | Overall          | 1/1452 ( <0.1%) | 244410             |
| Overweight                                                          | 1st year         | 1/1452 ( <0.1%) | 160718             |
|                                                                     | Overall          | 1/1452 ( <0.1%) | 160718             |
| Vitamin B12 deficiency                                              | 2nd year         | 1/1206 ( <0.1%) | 240603             |
|                                                                     | Overall          | 1/1452 ( <0.1%) | 240603             |

Table 14.3.1 / 10: Number of subjects with adverse events including subject identifier and year by treatment (FAS)  
 (cont.)

TREATMENT: LCS16

| Primary system organ class                      | YEAR OF ONSET | N (%)             | subject identifier                                                                                                                                                                                                                                     |
|-------------------------------------------------|---------------|-------------------|--------------------------------------------------------------------------------------------------------------------------------------------------------------------------------------------------------------------------------------------------------|
| Preferred term                                  |               |                   |                                                                                                                                                                                                                                                        |
| MedDRA version 14.0                             |               |                   |                                                                                                                                                                                                                                                        |
| Vitamin D deficiency                            | 2nd year      | 1/1206 ( <0.1%)   | 245703                                                                                                                                                                                                                                                 |
|                                                 | 3rd year      | 1/1012 ( <0.1%)   | 240325                                                                                                                                                                                                                                                 |
|                                                 | Overall       | 2/1452 ( 0.1%)    | 240325, 245703                                                                                                                                                                                                                                         |
| Weight fluctuation                              | 1st year      | 1/1452 ( <0.1%)   | 230915                                                                                                                                                                                                                                                 |
|                                                 | Overall       | 1/1452 ( <0.1%)   | 230915                                                                                                                                                                                                                                                 |
| Musculoskeletal and connective tissue disorders | 1st year      | 109/1452 ( 7.5%)  |                                                                                                                                                                                                                                                        |
|                                                 | 2nd year      | 50/1206 ( 4.1%)   |                                                                                                                                                                                                                                                        |
|                                                 | 3rd year      | 55/1012 ( 5.4%)   |                                                                                                                                                                                                                                                        |
|                                                 | Overall       | 187/1452 ( 12.9%) |                                                                                                                                                                                                                                                        |
| Arthralgia                                      | 1st year      | 19/1452 ( 1.3%)   | 120614, 140722, 160620, 160745, 160747, 161306, 161417, 210105, 240524, 240645, 240803, 241237, 241301, 242813, 243211, 244521, 244808, 245505, 246201                                                                                                 |
|                                                 | 2nd year      | 8/1206 ( 0.7%)    | 140119, 141420, 160202, 160219, 160419, 160629, 240240, 244935                                                                                                                                                                                         |
|                                                 | 3rd year      | 5/1012 ( 0.5%)    | 120614, 141411, 160630, 210605, 244902                                                                                                                                                                                                                 |
|                                                 | Overall       | 31/1452 ( 2.1%)   | 120614, 140119, 140722, 141411, 141420, 160202, 160219, 160419, 160620, 160629, 160630, 160745, 160747, 161306, 161417, 210105, 210605, 240240, 240524, 240645, 240803, 241237, 241301, 242813, 243211, 244521, 244808, 244902, 244935, 245505, 246201 |
| Arthritis                                       | 1st year      | 1/1452 ( <0.1%)   | 180659                                                                                                                                                                                                                                                 |
|                                                 | 2nd year      | 2/1206 ( 0.2%)    | 120635, 240741                                                                                                                                                                                                                                         |
|                                                 | 3rd year      | 2/1012 ( 0.2%)    | 140909, 161315                                                                                                                                                                                                                                         |
|                                                 | Overall       | 5/1452 ( 0.3%)    | 120635, 140909, 161315, 180659, 240741                                                                                                                                                                                                                 |
| Axillary mass                                   | 2nd year      | 1/1206 ( <0.1%)   | 160556                                                                                                                                                                                                                                                 |
|                                                 | Overall       | 1/1452 ( <0.1%)   | 160556                                                                                                                                                                                                                                                 |



Table 14.3.1 / 10: Number of subjects with adverse events including subject identifier and year by treatment (FAS)  
 (cont.)

TREATMENT: LCS16

| Primary system organ class | YEAR OF ONSET | N (%)           | subject identifier                                                                                                                                                                                                                                                                                                                                                                                                                                                                                                                     |
|----------------------------|---------------|-----------------|----------------------------------------------------------------------------------------------------------------------------------------------------------------------------------------------------------------------------------------------------------------------------------------------------------------------------------------------------------------------------------------------------------------------------------------------------------------------------------------------------------------------------------------|
| Preferred term             |               |                 |                                                                                                                                                                                                                                                                                                                                                                                                                                                                                                                                        |
| MedDRA version 14.0        |               |                 |                                                                                                                                                                                                                                                                                                                                                                                                                                                                                                                                        |
| Back pain                  | 1st year      | 41/1452 ( 2.8%) | 120333, 120336, 120618, 140805, 141023, 141410, 150161, 160202, 160210, 160221, 160307, 160513, 160602, 160608, 160618, 160621, 160719, 160727, 160802, 160808, 160934, 161204, 161309, 161401, 161535, 200633, 200701, 200902, 230215, 230513, 241109, 241219, 241301, 243228, 243402, 243960, 243963, 243964, 244406, 245505, 246127                                                                                                                                                                                                 |
|                            | 2nd year      | 15/1206 ( 1.2%) | 120618, 140805, 160611, 160612, 160730, 160735, 160919, 161008, 161529, 200702, 230416, 240632, 243229, 244433, 245905                                                                                                                                                                                                                                                                                                                                                                                                                 |
|                            | 3rd year      | 14/1012 ( 1.4%) | 120311, 120314, 160602, 160919, 161314, 161430, 230513, 240703, 241401, 241546, 242918, 243954, 245522, 246134                                                                                                                                                                                                                                                                                                                                                                                                                         |
|                            | Overall       | 65/1452 ( 4.5%) | 120311, 120314, 120333, 120336, 120618, 140805, 141023, 141410, 150161, 160202, 160210, 160221, 160307, 160513, 160602, 160608, 160611, 160612, 160618, 160621, 160719, 160727, 160730, 160735, 160802, 160808, 160919, 160934, 161008, 161204, 161309, 161314, 161401, 161430, 161529, 161535, 200633, 200701, 200702, 200902, 230215, 230416, 230513, 240632, 240703, 241109, 241219, 241301, 241401, 241546, 242918, 243228, 243229, 243402, 243954, 243960, 243963, 243964, 244406, 244433, 245505, 245522, 245905, 246127, 246134 |
| Bone pain                  | 1st year      | 1/1452 (<0.1%)  | 244113                                                                                                                                                                                                                                                                                                                                                                                                                                                                                                                                 |
|                            | 3rd year      | 2/1012 ( 0.2%)  | 120311, 200920                                                                                                                                                                                                                                                                                                                                                                                                                                                                                                                         |
|                            | Overall       | 3/1452 ( 0.2%)  | 120311, 200920, 244113                                                                                                                                                                                                                                                                                                                                                                                                                                                                                                                 |
| Bursitis                   | 1st year      | 1/1452 (<0.1%)  | 240905                                                                                                                                                                                                                                                                                                                                                                                                                                                                                                                                 |
|                            | Overall       | 1/1452 (<0.1%)  | 240905                                                                                                                                                                                                                                                                                                                                                                                                                                                                                                                                 |
| Compartment syndrome       | 2nd year      | 1/1206 (<0.1%)  | 161432                                                                                                                                                                                                                                                                                                                                                                                                                                                                                                                                 |
|                            | Overall       | 1/1452 (<0.1%)  | 161432                                                                                                                                                                                                                                                                                                                                                                                                                                                                                                                                 |
| Costochondritis            | 3rd year      | 1/1012 (<0.1%)  | 140812                                                                                                                                                                                                                                                                                                                                                                                                                                                                                                                                 |
|                            | Overall       | 1/1452 (<0.1%)  | 140812                                                                                                                                                                                                                                                                                                                                                                                                                                                                                                                                 |

Table 14.3.1 / 10: Number of subjects with adverse events including subject identifier and year by treatment (FAS)  
 (cont.)

TREATMENT: LCS16

| Primary system organ class<br>Preferred term<br>MedDRA version 14.0 | YEAR OF<br>ONSET | N (%)           | subject identifier             |
|---------------------------------------------------------------------|------------------|-----------------|--------------------------------|
| Exostosis                                                           | 1st year         | 1/1452 ( <0.1%) | 243501                         |
|                                                                     | 2nd year         | 2/1206 ( 0.2%)  | 240626, 243928                 |
|                                                                     | Overall          | 3/1452 ( 0.2%)  | 240626, 243501, 243928         |
| Fibromyalgia                                                        | 2nd year         | 1/1206 ( <0.1%) | 161004                         |
|                                                                     | 3rd year         | 1/1012 ( <0.1%) | 240325                         |
|                                                                     | Overall          | 2/1452 ( 0.1%)  | 161004, 240325                 |
| Flank pain                                                          | 1st year         | 2/1452 ( 0.1%)  | 161302, 241401                 |
|                                                                     | 3rd year         | 1/1012 ( <0.1%) | 160611                         |
|                                                                     | Overall          | 3/1452 ( 0.2%)  | 160611, 161302, 241401         |
| Groin pain                                                          | 1st year         | 2/1452 ( 0.1%)  | 230609, 244933                 |
|                                                                     | 3rd year         | 2/1012 ( 0.2%)  | 120226, 160987                 |
|                                                                     | Overall          | 4/1452 ( 0.3%)  | 120226, 160987, 230609, 244933 |
| Hand deformity                                                      | 1st year         | 1/1452 ( <0.1%) | 241237                         |
|                                                                     | Overall          | 1/1452 ( <0.1%) | 241237                         |
| Intervertebral disc disorder                                        | 1st year         | 1/1452 ( <0.1%) | 161321                         |
|                                                                     | Overall          | 1/1452 ( <0.1%) | 161321                         |
| Intervertebral disc protrusion                                      | 2nd year         | 2/1206 ( 0.2%)  | 120426, 245707                 |
|                                                                     | 3rd year         | 1/1012 ( <0.1%) | 140106                         |
|                                                                     | Overall          | 3/1452 ( 0.2%)  | 120426, 140106, 245707         |
| Joint instability                                                   | 2nd year         | 1/1206 ( <0.1%) | 140704                         |
|                                                                     | 3rd year         | 1/1012 ( <0.1%) | 140704                         |
|                                                                     | Overall          | 1/1452 ( <0.1%) | 140704                         |
| Joint stiffness                                                     | 2nd year         | 1/1206 ( <0.1%) | 245905                         |
|                                                                     | Overall          | 1/1452 ( <0.1%) | 245905                         |
| Joint swelling                                                      | 1st year         | 1/1452 ( <0.1%) | 161432                         |
|                                                                     | Overall          | 1/1452 ( <0.1%) | 161432                         |
| Loose body in joint                                                 | 2nd year         | 1/1206 ( <0.1%) | 160419                         |
|                                                                     | Overall          | 1/1452 ( <0.1%) | 160419                         |

Table 14.3.1 / 10: Number of subjects with adverse events including subject identifier and year by treatment (FAS)  
 (cont.)

TREATMENT: LCS16

| Primary system organ class    | YEAR OF ONSET | N (%)           | subject identifier                                                                     |
|-------------------------------|---------------|-----------------|----------------------------------------------------------------------------------------|
| Medial tibial stress syndrome | 2nd year      | 1/1206 ( <0.1%) | 160936                                                                                 |
|                               | 3rd year      | 1/1012 ( <0.1%) | 161306                                                                                 |
|                               | Overall       | 2/1452 ( 0.1%)  | 160936, 161306                                                                         |
| Muscle contracture            | 1st year      | 1/1452 ( <0.1%) | 120415                                                                                 |
|                               | 2nd year      | 1/1206 ( <0.1%) | 120609                                                                                 |
|                               | Overall       | 2/1452 ( 0.1%)  | 120415, 120609                                                                         |
| Muscle spasms                 | 1st year      | 6/1452 ( 0.4%)  | 241173, 241403, 242104, 243949, 243963, 245507                                         |
|                               | 3rd year      | 2/1012 ( 0.2%)  | 161116, 241401                                                                         |
|                               | Overall       | 8/1452 ( 0.6%)  | 161116, 241173, 241401, 241403, 242104, 243949, 243963, 245507                         |
| Muscle tightness              | 1st year      | 4/1452 ( 0.3%)  | 160627, 161004, 161020, 161309                                                         |
|                               | 2nd year      | 1/1206 ( <0.1%) | 161004                                                                                 |
|                               | 3rd year      | 6/1012 ( 0.6%)  | 160441, 160709, 160752, 161125, 161302, 244619                                         |
|                               | Overall       | 10/1452 ( 0.7%) | 160441, 160627, 160709, 160752, 161004, 161020, 161125, 161302, 161309, 244619         |
| Musculoskeletal chest pain    | 1st year      | 2/1452 ( 0.1%)  | 243216, 245511                                                                         |
|                               | Overall       | 2/1452 ( 0.1%)  | 243216, 245511                                                                         |
| Musculoskeletal discomfort    | 2nd year      | 1/1206 ( <0.1%) | 244902                                                                                 |
|                               | Overall       | 1/1452 ( <0.1%) | 244902                                                                                 |
| Musculoskeletal pain          | 1st year      | 7/1452 ( 0.5%)  | 160622, 161128, 161201, 161314, 161404, 161429, 200920                                 |
|                               | 2nd year      | 4/1206 ( 0.3%)  | 161430, 180112, 200920, 243223                                                         |
|                               | 3rd year      | 1/1012 ( <0.1%) | 200702                                                                                 |
|                               | Overall       | 11/1452 ( 0.8%) | 160622, 161128, 161201, 161314, 161404, 161429, 161430, 180112, 200702, 200920, 243223 |
| Musculoskeletal stiffness     | 2nd year      | 1/1206 ( <0.1%) | 245905                                                                                 |
|                               | Overall       | 1/1452 ( <0.1%) | 245905                                                                                 |

Table 14.3.1 / 10: Number of subjects with adverse events including subject identifier and year by treatment (FAS)  
 (cont.)

TREATMENT: LCS16

| Primary system organ class<br>Preferred term<br>MedDRA version 14.0 | YEAR OF<br>ONSET | N (%)           | subject identifier                                                                                                           |
|---------------------------------------------------------------------|------------------|-----------------|------------------------------------------------------------------------------------------------------------------------------|
| Myalgia                                                             | 1st year         | 8/1452 ( 0.6%)  | 140119, 160562, 200902, 210103, 210601, 243902,<br>244106, 245917                                                            |
|                                                                     | 2nd year         | 2/1206 ( 0.2%)  | 230514, 230915                                                                                                               |
|                                                                     | 3rd year         | 2/1012 ( 0.2%)  | 160510, 242321                                                                                                               |
|                                                                     | Overall          | 12/1452 ( 0.8%) | 140119, 160510, 160562, 200902, 210103, 210601,<br>230514, 230915, 242321, 243902, 244106, 245917                            |
| Myositis                                                            | 1st year         | 1/1452 ( <0.1%) | 230807                                                                                                                       |
|                                                                     | Overall          | 1/1452 ( <0.1%) | 230807                                                                                                                       |
| Neck pain                                                           | 1st year         | 6/1452 ( 0.4%)  | 120618, 140523, 160755, 242317, 242801, 243960                                                                               |
|                                                                     | 2nd year         | 2/1206 ( 0.2%)  | 120336, 150126                                                                                                               |
|                                                                     | 3rd year         | 2/1012 ( 0.2%)  | 120318, 240703                                                                                                               |
|                                                                     | Overall          | 10/1452 ( 0.7%) | 120318, 120336, 120618, 140523, 150126, 160755,<br>240703, 242317, 242801, 243960                                            |
| Osteoarthritis                                                      | 1st year         | 2/1452 ( 0.1%)  | 160921, 240325                                                                                                               |
|                                                                     | Overall          | 2/1452 ( 0.1%)  | 160921, 240325                                                                                                               |
| Osteochondrosis                                                     | 3rd year         | 2/1012 ( 0.2%)  | 161417, 240708                                                                                                               |
|                                                                     | Overall          | 2/1452 ( 0.1%)  | 161417, 240708                                                                                                               |
| Osteopenia                                                          | 2nd year         | 1/1206 ( <0.1%) | 160219                                                                                                                       |
|                                                                     | Overall          | 1/1452 ( <0.1%) | 160219                                                                                                                       |
| Pain in extremity                                                   | 1st year         | 8/1452 ( 0.6%)  | 160703, 160808, 210105, 241301, 243936, 244519,<br>244933, 245505                                                            |
|                                                                     | 2nd year         | 3/1206 ( 0.2%)  | 241170, 244305, 245011                                                                                                       |
|                                                                     | 3rd year         | 4/1012 ( 0.4%)  | 161025, 161432, 241555, 244923                                                                                               |
|                                                                     | Overall          | 15/1452 ( 1.0%) | 160703, 160808, 161025, 161432, 210105, 241170,<br>241301, 241555, 243936, 244305, 244519, 244923,<br>244933, 245011, 245505 |
| Pain in jaw                                                         | 3rd year         | 1/1012 ( <0.1%) | 160324                                                                                                                       |
|                                                                     | Overall          | 1/1452 ( <0.1%) | 160324                                                                                                                       |
| Plantar fasciitis                                                   | 1st year         | 1/1452 ( <0.1%) | 241310                                                                                                                       |
|                                                                     | Overall          | 1/1452 ( <0.1%) | 241310                                                                                                                       |

Table 14.3.1 / 10: Number of subjects with adverse events including subject identifier and year by treatment (FAS)  
 (cont.)

TREATMENT: LCS16

| Primary system organ class<br>Preferred term<br>MedDRA version 14.0 | YEAR OF<br>ONSET | N (%)           | subject identifier                             |
|---------------------------------------------------------------------|------------------|-----------------|------------------------------------------------|
| Rotator cuff syndrome                                               | 1st year         | 1/1452 ( <0.1%) | 161535                                         |
|                                                                     | 2nd year         | 3/1206 ( 0.2%)  | 160978, 241117, 243928                         |
|                                                                     | 3rd year         | 2/1012 ( 0.2%)  | 160628, 160632                                 |
|                                                                     | Overall          | 6/1452 ( 0.4%)  | 160628, 160632, 160978, 161535, 241117, 243928 |
| Sensation of heaviness                                              | 3rd year         | 1/1012 ( <0.1%) | 120617                                         |
|                                                                     | Overall          | 1/1452 ( <0.1%) | 120617                                         |
| Temporomandibular joint syndrome                                    | 3rd year         | 1/1012 ( <0.1%) | 140804                                         |
|                                                                     | Overall          | 1/1452 ( <0.1%) | 140804                                         |
| Tendon pain                                                         | 1st year         | 1/1452 ( <0.1%) | 160980                                         |
|                                                                     | Overall          | 1/1452 ( <0.1%) | 160980                                         |
| Tendonitis                                                          | 1st year         | 4/1452 ( 0.3%)  | 120404, 200902, 242814, 243801                 |
|                                                                     | 3rd year         | 1/1012 ( <0.1%) | 160936                                         |
|                                                                     | Overall          | 5/1452 ( 0.3%)  | 120404, 160936, 200902, 242814, 243801         |
| Tenosynovitis                                                       | 1st year         | 1/1452 ( <0.1%) | 161118                                         |
|                                                                     | 3rd year         | 1/1012 ( <0.1%) | 161118                                         |
|                                                                     | Overall          | 1/1452 ( <0.1%) | 161118                                         |
| Torticollis                                                         | 2nd year         | 1/1206 ( <0.1%) | 160961                                         |
|                                                                     | 3rd year         | 1/1012 ( <0.1%) | 150118                                         |
|                                                                     | Overall          | 2/1452 ( 0.1%)  | 150118, 160961                                 |
| Neoplasms benign, malignant and unspecified (incl cysts and polyps) | 1st year         | 17/1452 ( 1.2%) |                                                |
|                                                                     | 2nd year         | 18/1206 ( 1.5%) |                                                |
|                                                                     | 3rd year         | 10/1012 ( 1.0%) |                                                |
|                                                                     | Overall          | 43/1452 ( 3.0%) |                                                |
| Acoustic neuroma                                                    | 3rd year         | 1/1012 ( <0.1%) | 160561                                         |
|                                                                     | Overall          | 1/1452 ( <0.1%) | 160561                                         |

Table 14.3.1 / 10: Number of subjects with adverse events including subject identifier and year by treatment (FAS)  
 (cont.)

TREATMENT: LCS16

| Primary system organ class<br>Preferred term<br>MedDRA version 14.0 | YEAR OF<br>ONSET | N (%)           | subject identifier             |
|---------------------------------------------------------------------|------------------|-----------------|--------------------------------|
| Acrochordon                                                         | 1st year         | 1/1452 ( <0.1%) | 245704                         |
|                                                                     | 2nd year         | 1/1206 ( <0.1%) | 200529                         |
|                                                                     | 3rd year         | 1/1012 ( <0.1%) | 161417                         |
|                                                                     | Overall          | 3/1452 ( 0.2%)  | 161417, 200529, 245704         |
| Adenoma benign                                                      | 2nd year         | 1/1206 ( <0.1%) | 242813                         |
|                                                                     | Overall          | 1/1452 ( <0.1%) | 242813                         |
| Benign breast neoplasm                                              | 1st year         | 1/1452 ( <0.1%) | 230106                         |
|                                                                     | Overall          | 1/1452 ( <0.1%) | 230106                         |
| Cervicitis human papilloma virus                                    | 1st year         | 1/1452 ( <0.1%) | 242314                         |
|                                                                     | 2nd year         | 3/1206 ( 0.2%)  | 120635, 190202, 241101         |
|                                                                     | Overall          | 4/1452 ( 0.3%)  | 120635, 190202, 241101, 242314 |
| Cervix carcinoma stage 0                                            | 3rd year         | 1/1012 ( <0.1%) | 230309                         |
|                                                                     | Overall          | 1/1452 ( <0.1%) | 230309                         |
| Enchondroma                                                         | 2nd year         | 1/1206 ( <0.1%) | 160629                         |
|                                                                     | Overall          | 1/1452 ( <0.1%) | 160629                         |
| Fibroadenoma of breast                                              | 1st year         | 1/1452 ( <0.1%) | 140607                         |
|                                                                     | 2nd year         | 1/1206 ( <0.1%) | 241412                         |
|                                                                     | Overall          | 2/1452 ( 0.1%)  | 140607, 241412                 |
| Haemangioma of liver                                                | 2nd year         | 1/1206 ( <0.1%) | 241731                         |
|                                                                     | Overall          | 1/1452 ( <0.1%) | 241731                         |
| Leiomyoma                                                           | 2nd year         | 1/1206 ( <0.1%) | 243966                         |
|                                                                     | Overall          | 1/1452 ( <0.1%) | 243966                         |
| Malignant melanoma                                                  | 2nd year         | 1/1206 ( <0.1%) | 243229                         |
|                                                                     | Overall          | 1/1452 ( <0.1%) | 243229                         |
| Melanocytic naevus                                                  | 1st year         | 2/1452 ( 0.1%)  | 161432, 180663                 |
|                                                                     | 2nd year         | 1/1206 ( <0.1%) | 245905                         |
|                                                                     | 3rd year         | 1/1012 ( <0.1%) | 160517                         |
|                                                                     | Overall          | 4/1452 ( 0.3%)  | 160517, 161432, 180663, 245905 |

Table 14.3.1 / 10: Number of subjects with adverse events including subject identifier and year by treatment (FAS)  
 (cont.)

TREATMENT: LCS16

| Primary system organ class<br>Preferred term<br>MedDRA version 14.0 | YEAR OF<br>ONSET | N (%)             | subject identifier                             |
|---------------------------------------------------------------------|------------------|-------------------|------------------------------------------------|
| Neurilemmoma                                                        | 1st year         | 1/1452 ( <0.1%)   | 160556                                         |
|                                                                     | Overall          | 1/1452 ( <0.1%)   | 160556                                         |
| Ovarian germ cell teratoma benign                                   | 1st year         | 3/1452 ( 0.2%)    | 180422, 200409, 241714                         |
|                                                                     | Overall          | 3/1452 ( 0.2%)    | 180422, 200409, 241714                         |
| Ovarian neoplasm                                                    | 1st year         | 2/1452 ( 0.1%)    | 160545, 180422                                 |
|                                                                     | Overall          | 2/1452 ( 0.1%)    | 160545, 180422                                 |
| Pancreatic carcinoma                                                | 1st year         | 1/1452 ( <0.1%)   | 210604                                         |
|                                                                     | Overall          | 1/1452 ( <0.1%)   | 210604                                         |
| Skin papilloma                                                      | 1st year         | 1/1452 ( <0.1%)   | 244433                                         |
|                                                                     | 2nd year         | 1/1206 ( <0.1%)   | 141025                                         |
|                                                                     | Overall          | 2/1452 ( 0.1%)    | 141025, 244433                                 |
| Teratoma benign                                                     | 2nd year         | 1/1206 ( <0.1%)   | 190622                                         |
|                                                                     | Overall          | 1/1452 ( <0.1%)   | 190622                                         |
| Thyroid neoplasm                                                    | 2nd year         | 1/1206 ( <0.1%)   | 243016                                         |
|                                                                     | 3rd year         | 1/1012 ( <0.1%)   | 141425                                         |
|                                                                     | Overall          | 2/1452 ( 0.1%)    | 141425, 243016                                 |
| Uterine leiomyoma                                                   | 1st year         | 2/1452 ( 0.1%)    | 190603, 243001                                 |
|                                                                     | 2nd year         | 2/1206 ( 0.2%)    | 190123, 200529                                 |
|                                                                     | 3rd year         | 4/1012 ( 0.4%)    | 190123, 190603, 241546, 243918                 |
|                                                                     | Overall          | 6/1452 ( 0.4%)    | 190123, 190603, 200529, 241546, 243001, 243918 |
| Vulvovaginal human papilloma virus infection                        | 1st year         | 2/1452 ( 0.1%)    | 140223, 230209                                 |
|                                                                     | 2nd year         | 3/1206 ( 0.2%)    | 160761, 190142, 245517                         |
|                                                                     | 3rd year         | 1/1012 ( <0.1%)   | 160762                                         |
|                                                                     | Overall          | 6/1452 ( 0.4%)    | 140223, 160761, 160762, 190142, 230209, 245517 |
| Nervous system disorders                                            | 1st year         | 170/1452 ( 11.7%) |                                                |
|                                                                     | 2nd year         | 48/1206 ( 4.0%)   |                                                |
|                                                                     | 3rd year         | 39/1012 ( 3.9%)   |                                                |
|                                                                     | Overall          | 221/1452 ( 15.2%) |                                                |

Table 14.3.1 / 10: Number of subjects with adverse events including subject identifier and year by treatment (FAS)  
(cont.)

TREATMENT: LCS16

| Primary system organ class<br>Preferred term<br>MedDRA version 14.0 | YEAR OF<br>ONSET | N (%)           | subject identifier                                                                                                                                                             |
|---------------------------------------------------------------------|------------------|-----------------|--------------------------------------------------------------------------------------------------------------------------------------------------------------------------------|
| Amnesia                                                             | 2nd year         | 1/1206 ( <0.1%) | 241555                                                                                                                                                                         |
|                                                                     | Overall          | 1/1452 ( <0.1%) | 241555                                                                                                                                                                         |
| Aphonia                                                             | 1st year         | 1/1452 ( <0.1%) | 140101                                                                                                                                                                         |
|                                                                     | Overall          | 1/1452 ( <0.1%) | 140101                                                                                                                                                                         |
| Carpal tunnel syndrome                                              | 1st year         | 4/1452 ( 0.3%)  | 160303, 160608, 243963, 245918                                                                                                                                                 |
|                                                                     | 2nd year         | 2/1206 ( 0.2%)  | 141411, 241533                                                                                                                                                                 |
|                                                                     | Overall          | 6/1452 ( 0.4%)  | 141411, 160303, 160608, 241533, 243963, 245918                                                                                                                                 |
| Cervicobrachial syndrome                                            | 1st year         | 1/1452 ( <0.1%) | 241206                                                                                                                                                                         |
|                                                                     | Overall          | 1/1452 ( <0.1%) | 241206                                                                                                                                                                         |
| Cluster headache                                                    | 2nd year         | 1/1206 ( <0.1%) | 244010                                                                                                                                                                         |
|                                                                     | Overall          | 1/1452 ( <0.1%) | 244010                                                                                                                                                                         |
| Convulsion                                                          | 1st year         | 2/1452 ( 0.1%)  | 245407, 245905                                                                                                                                                                 |
|                                                                     | Overall          | 2/1452 ( 0.1%)  | 245407, 245905                                                                                                                                                                 |
| Disturbance in attention                                            | 2nd year         | 1/1206 ( <0.1%) | 241420                                                                                                                                                                         |
|                                                                     | 3rd year         | 1/1012 ( <0.1%) | 141304                                                                                                                                                                         |
|                                                                     | Overall          | 2/1452 ( 0.1%)  | 141304, 241420                                                                                                                                                                 |
| Dizziness                                                           | 1st year         | 14/1452 ( 1.0%) | 120336, 120603, 120614, 120616, 140810, 141407, 200302, 210410, 230203, 240329, 242915, 243109, 243703, 245511                                                                 |
|                                                                     | 2nd year         | 3/1206 ( 0.2%)  | 140112, 160543, 241726                                                                                                                                                         |
|                                                                     | 3rd year         | 5/1012 ( 0.5%)  | 150137, 161223, 190633, 230207, 245522                                                                                                                                         |
|                                                                     | Overall          | 22/1452 ( 1.5%) | 120336, 120603, 120614, 120616, 140112, 140810, 141407, 150137, 160543, 161223, 190633, 200302, 210410, 230203, 230207, 240329, 241726, 242915, 243109, 243703, 245511, 245522 |



Table 14.3.1 / 10: Number of subjects with adverse events including subject identifier and year by treatment (FAS)  
 (cont.)

TREATMENT: LCS16

Primary system organ class

| Preferred term<br>MedDRA version 14.0 | YEAR OF<br>ONSET | N (%)            | subject identifier                                                                                                                                                                                                                                                                                                                                                                                                                                                                                                                                                                                                                                                                                                                                                                                                                                                                             |
|---------------------------------------|------------------|------------------|------------------------------------------------------------------------------------------------------------------------------------------------------------------------------------------------------------------------------------------------------------------------------------------------------------------------------------------------------------------------------------------------------------------------------------------------------------------------------------------------------------------------------------------------------------------------------------------------------------------------------------------------------------------------------------------------------------------------------------------------------------------------------------------------------------------------------------------------------------------------------------------------|
| Headache                              | 1st year         | 108/1452 ( 7.4%) | 120101, 120313, 120328, 120334, 120336, 120404, 120406, 120603, 120606, 120607, 120609, 120612, 120615, 120618, 120622, 120627, 120629, 120631, 120635, 140120, 140504, 140508, 140523, 140601, 140603, 140801, 140810, 150161, 160124, 160303, 160324, 160438, 160504, 160508, 160553, 160602, 160603, 160612, 160618, 160621, 160627, 160628, 160629, 160634, 160635, 160636, 160727, 160737, 160966, 161016, 161128, 161216, 161302, 161306, 161309, 161311, 161315, 161524, 161526, 161528, 161535, 170701, 180310, 180625, 190620, 200508, 200510, 200620, 200628, 200917, 200926, 210405, 210408, 210413, 210601, 230305, 230306, 230601, 230608, 230610, 230614, 230705, 230811, 230905, 230916, 241002, 241145, 241179, 241418, 241503, 241529, 241537, 241801, 242306, 243606, 243707, 243719, 243909, 243934, 243954, 243966, 244113, 244114, 244410, 244517, 244703, 245707, 245908 |
|                                       | 2nd year         | 28/1206 ( 2.3%)  | 120303, 120410, 120425, 120603, 120612, 120618, 160602, 160627, 160728, 161116, 161307, 161524, 161526, 161535, 190603, 190622, 190624, 230306, 230610, 230811, 242104, 242310, 242912, 243703, 244113, 244123, 244516, 245905                                                                                                                                                                                                                                                                                                                                                                                                                                                                                                                                                                                                                                                                 |
|                                       | 3rd year         | 23/1012 ( 2.3%)  | 120102, 120302, 120303, 120311, 120337, 120410, 120612, 160602, 160608, 160716, 161223, 161526, 190214, 190603, 190633, 210405, 240127, 242104, 243703, 243964, 244517, 244805, 244902                                                                                                                                                                                                                                                                                                                                                                                                                                                                                                                                                                                                                                                                                                         |
|                                       | Overall          | 137/1452 ( 9.4%) | 120101, 120102, 120302, 120303, 120311, 120313, 120328, 120334, 120336, 120337, 120404, 120406, 120410, 120425, 120603, 120606, 120607, 120609, 120612, 120615, 120618, 120622, 120627, 120629, 120631, 120635, 140120, 140504, 140508, 140523, 140601, 140603, 140801, 140810, 150161, 160124, 160303, 160324, 160438, 160504, 160508, 160553, 160602, 160603, 160608, 160612, 160618, 160621, 160627, 160628,                                                                                                                                                                                                                                                                                                                                                                                                                                                                                |

Table 14.3.1 / 10: Number of subjects with adverse events including subject identifier and year by treatment (FAS)  
 (cont.)

TREATMENT: LCS16

Primary system organ class

| Preferred term<br>MedDRA version 14.0 | YEAR OF<br>ONSET |  | N (%)           | subject identifier                                                                                                                                                                                                                                                                                                                                                                                                                                                                                                                                                                                                                                                                                                                                                     |
|---------------------------------------|------------------|--|-----------------|------------------------------------------------------------------------------------------------------------------------------------------------------------------------------------------------------------------------------------------------------------------------------------------------------------------------------------------------------------------------------------------------------------------------------------------------------------------------------------------------------------------------------------------------------------------------------------------------------------------------------------------------------------------------------------------------------------------------------------------------------------------------|
|                                       |                  |  |                 | 160629, 160634, 160635, 160636, 160716, 160727,<br>160728, 160737, 160966, 161016, 161116, 161128,<br>161216, 161223, 161302, 161306, 161307, 161309,<br>161311, 161315, 161524, 161526, 161528, 161535,<br>170701,<br>180310, 180625, 190214, 190603, 190620, 190622,<br>190624, 190633, 200508, 200510, 200620, 200628,<br>200917, 200926, 210405, 210408, 210413, 210601,<br>230305, 230306, 230601, 230608, 230610, 230614,<br>230705,<br>230811, 230905, 230916, 240127, 241002, 241145,<br>241179, 241418, 241503, 241529, 241537, 241801,<br>242104, 242306, 242310, 242912, 243606, 243703,<br>243707, 243719, 243909, 243934, 243954, 243964,<br>243966,<br>244113, 244114, 244123, 244410, 244516, 244517,<br>244703, 244805, 244902, 245707, 245905, 245908 |
| Hypoaesthesia                         | 1st year         |  | 2/1452 ( 0.1%)  | 230305, 241173                                                                                                                                                                                                                                                                                                                                                                                                                                                                                                                                                                                                                                                                                                                                                         |
|                                       | 2nd year         |  | 1/1206 ( <0.1%) | 240220                                                                                                                                                                                                                                                                                                                                                                                                                                                                                                                                                                                                                                                                                                                                                                 |
|                                       | 3rd year         |  | 1/1012 ( <0.1%) | 230220                                                                                                                                                                                                                                                                                                                                                                                                                                                                                                                                                                                                                                                                                                                                                                 |
|                                       | Overall          |  | 4/1452 ( 0.3%)  | 230220, 230305, 240220, 241173                                                                                                                                                                                                                                                                                                                                                                                                                                                                                                                                                                                                                                                                                                                                         |
| Loss of consciousness                 | 1st year         |  | 1/1452 ( <0.1%) | 245511                                                                                                                                                                                                                                                                                                                                                                                                                                                                                                                                                                                                                                                                                                                                                                 |
|                                       | Overall          |  | 1/1452 ( <0.1%) | 245511                                                                                                                                                                                                                                                                                                                                                                                                                                                                                                                                                                                                                                                                                                                                                                 |

Table 14.3.1 / 10: Number of subjects with adverse events including subject identifier and year by treatment (FAS)  
 (cont.)

TREATMENT: LCS16

| Primary system organ class<br>Preferred term<br>MedDRA version 14.0 | YEAR OF<br>ONSET | N (%)           | subject identifier                                                                                                                                                                                                                                                                                             |
|---------------------------------------------------------------------|------------------|-----------------|----------------------------------------------------------------------------------------------------------------------------------------------------------------------------------------------------------------------------------------------------------------------------------------------------------------|
| Migraine                                                            | 1st year         | 25/1452 ( 1.7%) | 140207, 140227, 140514, 140526, 140801, 141415, 160314, 160429, 160502, 160513, 160731, 160752, 160802, 161005, 161101, 161118, 200707, 210128, 230402, 230705, 230823, 243406, 243957, 243966, 245009                                                                                                         |
|                                                                     | 2nd year         | 8/1206 ( 0.7%)  | 160936, 161526, 180659, 180706, 200632, 210405, 230305, 245905                                                                                                                                                                                                                                                 |
|                                                                     | 3rd year         | 6/1012 ( 0.6%)  | 140804, 160629, 160948, 161101, 161429, 244410                                                                                                                                                                                                                                                                 |
|                                                                     | Overall          | 38/1452 ( 2.6%) | 140207, 140227, 140514, 140526, 140801, 140804, 141415, 160314, 160429, 160502, 160513, 160629, 160731, 160752, 160802, 160936, 160948, 161005, 161101, 161118, 161429, 161526, 180659, 180706, 200632, 200707, 210128, 210405, 230305, 230402, 230705, 230823, 243406, 243957, 243966, 244410, 245009, 245905 |
| Migraine with aura                                                  | 1st year         | 1/1452 (<0.1%)  | 161107                                                                                                                                                                                                                                                                                                         |
|                                                                     | 3rd year         | 1/1012 (<0.1%)  | 244619                                                                                                                                                                                                                                                                                                         |
|                                                                     | Overall          | 2/1452 ( 0.1%)  | 161107, 244619                                                                                                                                                                                                                                                                                                 |
| Muscle contractions involuntary                                     | 1st year         | 1/1452 (<0.1%)  | 242104                                                                                                                                                                                                                                                                                                         |
|                                                                     | Overall          | 1/1452 (<0.1%)  | 242104                                                                                                                                                                                                                                                                                                         |
| Nervous system disorder                                             | 1st year         | 1/1452 (<0.1%)  | 200525                                                                                                                                                                                                                                                                                                         |
|                                                                     | Overall          | 1/1452 (<0.1%)  | 200525                                                                                                                                                                                                                                                                                                         |
| Paraesthesia                                                        | 1st year         | 4/1452 ( 0.3%)  | 161008, 200917, 230215, 230305                                                                                                                                                                                                                                                                                 |
|                                                                     | 3rd year         | 1/1012 (<0.1%)  | 240127                                                                                                                                                                                                                                                                                                         |
|                                                                     | Overall          | 5/1452 ( 0.3%)  | 161008, 200917, 230215, 230305, 240127                                                                                                                                                                                                                                                                         |
| Presyncope                                                          | 1st year         | 8/1452 ( 0.6%)  | 140513, 160912, 160932, 210212, 230319, 240506, 241802, 244922                                                                                                                                                                                                                                                 |
|                                                                     | 3rd year         | 1/1012 (<0.1%)  | 210405                                                                                                                                                                                                                                                                                                         |
|                                                                     | Overall          | 9/1452 ( 0.6%)  | 140513, 160912, 160932, 210212, 210405, 230319, 240506, 241802, 244922                                                                                                                                                                                                                                         |
| Sciatica                                                            | 1st year         | 3/1452 ( 0.2%)  | 160504, 160612, 180659                                                                                                                                                                                                                                                                                         |
|                                                                     | Overall          | 3/1452 ( 0.2%)  | 160504, 160612, 180659                                                                                                                                                                                                                                                                                         |

Table 14.3.1 / 10: Number of subjects with adverse events including subject identifier and year by treatment (FAS)  
 (cont.)

TREATMENT: LCS16

| Primary system organ class<br>Preferred term<br>MedDRA version 14.0 | YEAR OF<br>ONSET | N (%)           | subject identifier                                                     |
|---------------------------------------------------------------------|------------------|-----------------|------------------------------------------------------------------------|
| Sinus headache                                                      | 2nd year         | 1/1206 ( <0.1%) | 244516                                                                 |
|                                                                     | 3rd year         | 1/1012 ( <0.1%) | 245507                                                                 |
|                                                                     | Overall          | 2/1452 ( 0.1%)  | 244516, 245507                                                         |
| Somnolence                                                          | 2nd year         | 1/1206 ( <0.1%) | 244902                                                                 |
|                                                                     | Overall          | 1/1452 ( <0.1%) | 244902                                                                 |
| Spinal cord herniation                                              | 2nd year         | 1/1206 ( <0.1%) | 200114                                                                 |
|                                                                     | Overall          | 1/1452 ( <0.1%) | 200114                                                                 |
| Syncope                                                             | 1st year         | 4/1452 ( 0.3%)  | 140810, 240221, 241301, 243905                                         |
|                                                                     | 3rd year         | 1/1012 ( <0.1%) | 210405                                                                 |
|                                                                     | Overall          | 5/1452 ( 0.3%)  | 140810, 210405, 240221, 241301, 243905                                 |
| Tension headache                                                    | 1st year         | 4/1452 ( 0.3%)  | 140818, 161105, 161320, 243229                                         |
|                                                                     | 2nd year         | 3/1206 ( 0.2%)  | 150121, 243316, 244616                                                 |
|                                                                     | 3rd year         | 3/1012 ( 0.3%)  | 161105, 161107, 241555                                                 |
|                                                                     | Overall          | 9/1452 ( 0.6%)  | 140818, 150121, 161105, 161107, 161320, 241555, 243229, 243316, 244616 |
| Pregnancy, puerperium and perinatal conditions                      | 1st year         | 3/1452 ( 0.2%)  |                                                                        |
|                                                                     | 2nd year         | 3/1206 ( 0.2%)  |                                                                        |
|                                                                     | 3rd year         | 4/1012 ( 0.4%)  |                                                                        |
|                                                                     | Overall          | 10/1452 ( 0.7%) |                                                                        |
| Abortion spontaneous incomplete                                     | 2nd year         | 1/1206 ( <0.1%) | 180112                                                                 |
|                                                                     | Overall          | 1/1452 ( <0.1%) | 180112                                                                 |
| Blighted ovum                                                       | 3rd year         | 1/1012 ( <0.1%) | 160927                                                                 |
|                                                                     | Overall          | 1/1452 ( <0.1%) | 160927                                                                 |
| Ectopic pregnancy                                                   | 1st year         | 2/1452 ( 0.1%)  | 160423, 243228                                                         |
|                                                                     | 2nd year         | 2/1206 ( 0.2%)  | 180317, 200609                                                         |
|                                                                     | 3rd year         | 2/1012 ( 0.2%)  | 243932, 244519                                                         |
|                                                                     | Overall          | 6/1452 ( 0.4%)  | 160423, 180317, 200609, 243228, 243932, 244519                         |
| Ruptured ectopic pregnancy                                          | 3rd year         | 1/1012 ( <0.1%) | 242321                                                                 |
|                                                                     | Overall          | 1/1452 ( <0.1%) | 242321                                                                 |

Table 14.3.1 / 10: Number of subjects with adverse events including subject identifier and year by treatment (FAS)  
(cont.)

TREATMENT: LCS16

| Primary system organ class<br>Preferred term<br>MedDRA version 14.0 | YEAR OF<br>ONSET | N (%)             | subject identifier                                                                                                                                                                                                                                                                                     |
|---------------------------------------------------------------------|------------------|-------------------|--------------------------------------------------------------------------------------------------------------------------------------------------------------------------------------------------------------------------------------------------------------------------------------------------------|
| Uterine contractions abnormal                                       | 1st year         | 1/1452 ( <0.1%)   | 230309                                                                                                                                                                                                                                                                                                 |
|                                                                     | Overall          | 1/1452 ( <0.1%)   | 230309                                                                                                                                                                                                                                                                                                 |
| Psychiatric disorders                                               | 1st year         | 98/1452 ( 6.7%)   |                                                                                                                                                                                                                                                                                                        |
|                                                                     | 2nd year         | 53/1206 ( 4.4%)   |                                                                                                                                                                                                                                                                                                        |
|                                                                     | 3rd year         | 37/1012 ( 3.7%)   |                                                                                                                                                                                                                                                                                                        |
|                                                                     | Overall          | 172/1452 ( 11.8%) |                                                                                                                                                                                                                                                                                                        |
| Acute stress disorder                                               | 3rd year         | 1/1012 ( <0.1%)   | 200513                                                                                                                                                                                                                                                                                                 |
|                                                                     | Overall          | 1/1452 ( <0.1%)   | 200513                                                                                                                                                                                                                                                                                                 |
| Affect lability                                                     | 1st year         | 1/1452 ( <0.1%)   | 243823                                                                                                                                                                                                                                                                                                 |
|                                                                     | Overall          | 1/1452 ( <0.1%)   | 243823                                                                                                                                                                                                                                                                                                 |
| Affective disorder                                                  | 2nd year         | 1/1206 ( <0.1%)   | 244424                                                                                                                                                                                                                                                                                                 |
|                                                                     | Overall          | 1/1452 ( <0.1%)   | 244424                                                                                                                                                                                                                                                                                                 |
| Alcohol abuse                                                       | 2nd year         | 1/1206 ( <0.1%)   | 161214                                                                                                                                                                                                                                                                                                 |
|                                                                     | Overall          | 1/1452 ( <0.1%)   | 161214                                                                                                                                                                                                                                                                                                 |
| Alcoholism                                                          | 2nd year         | 1/1206 ( <0.1%)   | 244424                                                                                                                                                                                                                                                                                                 |
|                                                                     | Overall          | 1/1452 ( <0.1%)   | 244424                                                                                                                                                                                                                                                                                                 |
| Anxiety                                                             | 1st year         | 17/1452 ( 1.2%)   | 140805, 141304, 150137, 160612, 200220, 240329, 240717, 241155, 241170, 241705, 242811, 243319, 243909, 243963, 243967, 244619, 244703                                                                                                                                                                 |
|                                                                     | 2nd year         | 12/1206 ( 1.0%)   | 140720, 161311, 180720, 240703, 241403, 241420, 243001, 243507, 243966, 244424, 244519, 245513                                                                                                                                                                                                         |
|                                                                     | 3rd year         | 10/1012 ( 1.0%)   | 140106, 140601, 140805, 141415, 240626, 241308, 241419, 243319, 243504, 245427                                                                                                                                                                                                                         |
|                                                                     | Overall          | 37/1452 ( 2.5%)   | 140106, 140601, 140720, 140805, 141304, 141415, 150137, 160612, 161311, 180720, 200220, 240329, 240626, 240703, 240717, 241155, 241170, 241308, 241403, 241419, 241420, 241705, 242811, 243001, 243319, 243504, 243507, 243909, 243963, 243966, 243967, 244424, 244519, 244619, 244703, 245427, 245513 |

Table 14.3.1 / 10: Number of subjects with adverse events including subject identifier and year by treatment (FAS)  
 (cont.)

TREATMENT: LCS16

| Primary system organ class               | YEAR OF ONSET | N (%)           | subject identifier                             |
|------------------------------------------|---------------|-----------------|------------------------------------------------|
| Anxiety disorder                         | 1st year      | 2/1452 ( 0.1%)  | 150120, 244305                                 |
|                                          | 2nd year      | 1/1206 ( <0.1%) | 230801                                         |
|                                          | 3rd year      | 1/1012 ( <0.1%) | 140913                                         |
|                                          | Overall       | 4/1452 ( 0.3%)  | 140913, 150120, 230801, 244305                 |
| Attention deficit/hyperactivity disorder | 1st year      | 3/1452 ( 0.2%)  | 240706, 246135, 246219                         |
|                                          | 2nd year      | 1/1206 ( <0.1%) | 243902                                         |
|                                          | Overall       | 4/1452 ( 0.3%)  | 240706, 243902, 246135, 246219                 |
| Bipolar disorder                         | 1st year      | 1/1452 ( <0.1%) | 244317                                         |
|                                          | 2nd year      | 2/1206 ( 0.2%)  | 243966, 244424                                 |
|                                          | 3rd year      | 3/1012 ( 0.3%)  | 240502, 240807, 245908                         |
|                                          | Overall       | 6/1452 ( 0.4%)  | 240502, 240807, 243966, 244317, 244424, 245908 |
| Bulimia nervosa                          | 1st year      | 1/1452 ( <0.1%) | 161502                                         |
|                                          | Overall       | 1/1452 ( <0.1%) | 161502                                         |
| Burnout syndrome                         | 1st year      | 1/1452 ( <0.1%) | 140106                                         |
|                                          | 2nd year      | 1/1206 ( <0.1%) | 160747                                         |
|                                          | Overall       | 2/1452 ( 0.1%)  | 140106, 160747                                 |
| Completed suicide                        | 3rd year      | 1/1012 ( <0.1%) | 210112                                         |
|                                          | Overall       | 1/1452 ( <0.1%) | 210112                                         |
| Depressed mood                           | 1st year      | 3/1452 ( 0.2%)  | 160513, 210122, 243601                         |
|                                          | Overall       | 3/1452 ( 0.2%)  | 160513, 210122, 243601                         |

Table 14.3.1 / 10: Number of subjects with adverse events including subject identifier and year by treatment (FAS)  
 (cont.)

TREATMENT: LCS16

| Primary system organ class<br>Preferred term<br>MedDRA version 14.0 | YEAR OF<br>ONSET | N (%)           | subject identifier                                                                                                                                                                                                                                                                                                                                                                                                             |
|---------------------------------------------------------------------|------------------|-----------------|--------------------------------------------------------------------------------------------------------------------------------------------------------------------------------------------------------------------------------------------------------------------------------------------------------------------------------------------------------------------------------------------------------------------------------|
| Depression                                                          | 1st year         | 26/1452 ( 1.8%) | 141111, 160969, 161417, 161502, 170803, 200515,<br>200907, 210121, 230305, 230905, 240128, 240501,<br>241197, 241219, 241418, 241801, 243225, 243306,<br>243319, 243508, 243956, 244126, 244305, 244432,<br>245035,<br>245905                                                                                                                                                                                                  |
|                                                                     | 2nd year         | 14/1206 ( 1.2%) | 141415, 150103, 150121, 150137, 160529, 200632,<br>230319, 231113, 241194, 241403, 243225, 243819,<br>243902, 243937                                                                                                                                                                                                                                                                                                           |
|                                                                     | 3rd year         | 12/1012 ( 1.2%) | 120615, 120616, 160562, 161302, 161432, 161538,<br>190214, 200711, 240523, 243225, 243306, 244130                                                                                                                                                                                                                                                                                                                              |
|                                                                     | Overall          | 49/1452 ( 3.4%) | 120615, 120616, 141111, 141415, 150103, 150121,<br>150137, 160529, 160562, 160969, 161302, 161417,<br>161432, 161502, 161538, 170803, 190214, 200515,<br>200632, 200711, 200907, 210121, 230305, 230319,<br>230905,<br>231113, 240128, 240501, 240523, 241194, 241197,<br>241219, 241403, 241418, 241801, 243225, 243306,<br>243319, 243508, 243819, 243902, 243937, 243956,<br>244126, 244130, 244305, 244432, 245035, 245905 |
| Disorientation                                                      | 1st year         | 1/1452 (<0.1%)  | 160403                                                                                                                                                                                                                                                                                                                                                                                                                         |
|                                                                     | Overall          | 1/1452 (<0.1%)  | 160403                                                                                                                                                                                                                                                                                                                                                                                                                         |
| Drug dependence                                                     | 2nd year         | 1/1206 (<0.1%)  | 244424                                                                                                                                                                                                                                                                                                                                                                                                                         |
|                                                                     | Overall          | 1/1452 (<0.1%)  | 244424                                                                                                                                                                                                                                                                                                                                                                                                                         |
| Fear                                                                | 1st year         | 1/1452 (<0.1%)  | 200510                                                                                                                                                                                                                                                                                                                                                                                                                         |
|                                                                     | Overall          | 1/1452 (<0.1%)  | 200510                                                                                                                                                                                                                                                                                                                                                                                                                         |

Table 14.3.1 / 10: Number of subjects with adverse events including subject identifier and year by treatment (FAS)  
 (cont.)

TREATMENT: LCS16

| Primary system organ class<br>Preferred term<br>MedDRA version 14.0 | YEAR OF<br>ONSET | N (%)           | subject identifier                                                                                                                                                                                                                     |
|---------------------------------------------------------------------|------------------|-----------------|----------------------------------------------------------------------------------------------------------------------------------------------------------------------------------------------------------------------------------------|
| Insomnia                                                            | 1st year         | 17/1452 ( 1.2%) | 120612, 140103, 140106, 140810, 140920, 141012, 141425, 160123, 160611, 161213, 241418, 242324, 243228, 244202, 244424, 244432, 245504                                                                                                 |
|                                                                     | 2nd year         | 10/1206 ( 0.8%) | 140101, 140810, 140901, 140902, 160512, 161214, 161311, 210413, 241419, 241420                                                                                                                                                         |
|                                                                     | 3rd year         | 4/1012 ( 0.4%)  | 161213, 161302, 240325, 241403                                                                                                                                                                                                         |
|                                                                     | Overall          | 29/1452 ( 2.0%) | 120612, 140101, 140103, 140106, 140810, 140901, 140902, 140920, 141012, 141425, 160123, 160512, 160611, 161213, 161214, 161302, 161311, 210413, 240325, 241403, 241418, 241419, 241420, 242324, 243228, 244202, 244424, 244432, 245504 |
| Libido decreased                                                    | 1st year         | 16/1452 ( 1.1%) | 120303, 120313, 160203, 160703, 160723, 160755, 161510, 230601, 230916, 240221, 240645, 242811, 243303, 243976, 244002, 244451                                                                                                         |
|                                                                     | 2nd year         | 8/1206 ( 0.7%)  | 120406, 150120, 150122, 161433, 180641, 230909, 240504, 243215                                                                                                                                                                         |
|                                                                     | 3rd year         | 1/1012 (<0.1%)  | 241176                                                                                                                                                                                                                                 |
|                                                                     | Overall          | 25/1452 ( 1.7%) | 120303, 120313, 120406, 150120, 150122, 160203, 160703, 160723, 160755, 161433, 161510, 180641, 230601, 230909, 230916, 240221, 240504, 240645, 241176, 242811, 243215, 243303, 243976, 244002, 244451                                 |
| Libido increased                                                    | 1st year         | 1/1452 (<0.1%)  | 140810                                                                                                                                                                                                                                 |
|                                                                     | 2nd year         | 1/1206 (<0.1%)  | 230402                                                                                                                                                                                                                                 |
|                                                                     | Overall          | 2/1452 ( 0.1%)  | 140810, 230402                                                                                                                                                                                                                         |
| Loss of libido                                                      | 1st year         | 1/1452 (<0.1%)  | 161538                                                                                                                                                                                                                                 |
|                                                                     | 2nd year         | 1/1206 (<0.1%)  | 200632                                                                                                                                                                                                                                 |
|                                                                     | Overall          | 2/1452 ( 0.1%)  | 161538, 200632                                                                                                                                                                                                                         |
| Mental status changes                                               | 1st year         | 1/1452 (<0.1%)  | 161510                                                                                                                                                                                                                                 |
|                                                                     | Overall          | 1/1452 (<0.1%)  | 161510                                                                                                                                                                                                                                 |



Table 14.3.1 / 10: Number of subjects with adverse events including subject identifier and year by treatment (FAS)  
 (cont.)

TREATMENT: LCS16

| Primary system organ class<br>Preferred term<br>MedDRA version 14.0 | YEAR OF<br>ONSET | N (%)           | subject identifier                                                                |
|---------------------------------------------------------------------|------------------|-----------------|-----------------------------------------------------------------------------------|
| Mood altered                                                        | 1st year         | 8/1452 ( 0.6%)  | 120404, 141304, 160723, 230609, 230815, 231021,<br>240221, 245035                 |
|                                                                     | 2nd year         | 2/1206 ( 0.2%)  | 120318, 230909                                                                    |
|                                                                     | Overall          | 10/1452 ( 0.7%) | 120318, 120404, 141304, 160723, 230609, 230815,<br>230909, 231021, 240221, 245035 |
| Mood swings                                                         | 1st year         | 8/1452 ( 0.6%)  | 200630, 200926, 240626, 242321, 243901, 244110,<br>244432, 244703                 |
|                                                                     | 3rd year         | 1/1012 ( <0.1%) | 241508                                                                            |
|                                                                     | Overall          | 9/1452 ( 0.6%)  | 200630, 200926, 240626, 241508, 242321, 243901,<br>244110, 244432, 244703         |
| Nervousness                                                         | 1st year         | 1/1452 ( <0.1%) | 161019                                                                            |
|                                                                     | 2nd year         | 1/1206 ( <0.1%) | 120606                                                                            |
|                                                                     | Overall          | 2/1452 ( 0.1%)  | 120606, 161019                                                                    |
| Obsessive-compulsive personality disorder                           | 1st year         | 1/1452 ( <0.1%) | 240631                                                                            |
|                                                                     | Overall          | 1/1452 ( <0.1%) | 240631                                                                            |
| Panic attack                                                        | 1st year         | 1/1452 ( <0.1%) | 161019                                                                            |
|                                                                     | Overall          | 1/1452 ( <0.1%) | 161019                                                                            |
| Panic disorder                                                      | 1st year         | 1/1452 ( <0.1%) | 230601                                                                            |
|                                                                     | 2nd year         | 1/1206 ( <0.1%) | 161108                                                                            |
|                                                                     | 3rd year         | 3/1012 ( 0.3%)  | 160107, 160961, 161432                                                            |
|                                                                     | Overall          | 5/1452 ( 0.3%)  | 160107, 160961, 161108, 161432, 230601                                            |
| Phobia of flying                                                    | 3rd year         | 1/1012 ( <0.1%) | 160636                                                                            |
|                                                                     | Overall          | 1/1452 ( <0.1%) | 160636                                                                            |
| Polysubstance dependence                                            | 2nd year         | 1/1206 ( <0.1%) | 244424                                                                            |
|                                                                     | Overall          | 1/1452 ( <0.1%) | 244424                                                                            |
| Post-traumatic stress disorder                                      | 2nd year         | 1/1206 ( <0.1%) | 141102                                                                            |
|                                                                     | Overall          | 1/1452 ( <0.1%) | 141102                                                                            |
| Psychotic disorder                                                  | 2nd year         | 1/1206 ( <0.1%) | 200621                                                                            |
|                                                                     | Overall          | 1/1452 ( <0.1%) | 200621                                                                            |

Table 14.3.1 / 10: Number of subjects with adverse events including subject identifier and year by treatment (FAS)  
 (cont.)

TREATMENT: LCS16

| Primary system organ class<br>Preferred term<br>MedDRA version 14.0 | YEAR OF<br>ONSET | N (%)           | subject identifier                                     |
|---------------------------------------------------------------------|------------------|-----------------|--------------------------------------------------------|
| Sleep disorder                                                      | 1st year         | 1/1452 ( <0.1%) | 161008                                                 |
|                                                                     | 2nd year         | 1/1206 ( <0.1%) | 160948                                                 |
|                                                                     | Overall          | 2/1452 ( 0.1%)  | 160948, 161008                                         |
| Social phobia                                                       | 1st year         | 1/1452 ( <0.1%) | 240372                                                 |
|                                                                     | Overall          | 1/1452 ( <0.1%) | 240372                                                 |
| Stress                                                              | 2nd year         | 3/1206 ( 0.2%)  | 120609, 170703, 246115                                 |
|                                                                     | 3rd year         | 1/1012 ( <0.1%) | 241111                                                 |
|                                                                     | Overall          | 4/1452 ( 0.3%)  | 120609, 170703, 241111, 246115                         |
| Renal and urinary disorders                                         | 1st year         | 16/1452 ( 1.1%) |                                                        |
|                                                                     | 2nd year         | 8/1206 ( 0.7%)  |                                                        |
|                                                                     | 3rd year         | 9/1012 ( 0.9%)  |                                                        |
|                                                                     | Overall          | 31/1452 ( 2.1%) |                                                        |
| Calculus urinary                                                    | 1st year         | 1/1452 ( <0.1%) | 240803                                                 |
|                                                                     | Overall          | 1/1452 ( <0.1%) | 240803                                                 |
| Chromaturia                                                         | 1st year         | 1/1452 ( <0.1%) | 244128                                                 |
|                                                                     | Overall          | 1/1452 ( <0.1%) | 244128                                                 |
| Dysuria                                                             | 1st year         | 5/1452 ( 0.3%)  | 120207, 120606, 160426, 241540, 242207                 |
|                                                                     | 2nd year         | 2/1206 ( 0.2%)  | 241401, 244521                                         |
|                                                                     | Overall          | 7/1452 ( 0.5%)  | 120207, 120606, 160426, 241401, 241540, 242207, 244521 |
| Haematuria                                                          | 1st year         | 1/1452 ( <0.1%) | 241403                                                 |
|                                                                     | 3rd year         | 1/1012 ( <0.1%) | 240738                                                 |
|                                                                     | Overall          | 2/1452 ( 0.1%)  | 240738, 241403                                         |
| Hypertonic bladder                                                  | 3rd year         | 2/1012 ( 0.2%)  | 160942, 245427                                         |
|                                                                     | Overall          | 2/1452 ( 0.1%)  | 160942, 245427                                         |
| Micturition urgency                                                 | 2nd year         | 2/1206 ( 0.2%)  | 160608, 244714                                         |
|                                                                     | 3rd year         | 1/1012 ( <0.1%) | 241403                                                 |
|                                                                     | Overall          | 3/1452 ( 0.2%)  | 160608, 241403, 244714                                 |

Table 14.3.1 / 10: Number of subjects with adverse events including subject identifier and year by treatment (FAS)  
 (cont.)

TREATMENT: LCS16

| Primary system organ class<br>Preferred term<br>MedDRA version 14.0 | YEAR OF<br>ONSET | N (%)           | subject identifier                                             |
|---------------------------------------------------------------------|------------------|-----------------|----------------------------------------------------------------|
| Nephrolithiasis                                                     | 2nd year         | 2/1206 ( 0.2%)  | 180702, 244706                                                 |
|                                                                     | 3rd year         | 1/1012 ( <0.1%) | 245805                                                         |
|                                                                     | Overall          | 3/1452 ( 0.2%)  | 180702, 244706, 245805                                         |
| Pollakiuria                                                         | 1st year         | 7/1452 ( 0.5%)  | 141415, 200906, 241540, 242104, 242207, 243902, 244120         |
|                                                                     | 2nd year         | 1/1206 ( <0.1%) | 241008                                                         |
|                                                                     | Overall          | 8/1452 ( 0.6%)  | 141415, 200906, 241008, 241540, 242104, 242207, 243902, 244120 |
| Polyuria                                                            | 1st year         | 1/1452 ( <0.1%) | 150154                                                         |
|                                                                     | Overall          | 1/1452 ( <0.1%) | 150154                                                         |
| Renal cyst                                                          | 3rd year         | 1/1012 ( <0.1%) | 241546                                                         |
|                                                                     | Overall          | 1/1452 ( <0.1%) | 241546                                                         |
| Stress urinary incontinence                                         | 1st year         | 2/1452 ( 0.1%)  | 241243, 243902                                                 |
|                                                                     | Overall          | 2/1452 ( 0.1%)  | 241243, 243902                                                 |
| Ureteric obstruction                                                | 1st year         | 1/1452 ( <0.1%) | 240803                                                         |
|                                                                     | Overall          | 1/1452 ( <0.1%) | 240803                                                         |
| Urethral cyst                                                       | 3rd year         | 1/1012 ( <0.1%) | 141413                                                         |
|                                                                     | Overall          | 1/1452 ( <0.1%) | 141413                                                         |
| Urinary incontinence                                                | 2nd year         | 1/1206 ( <0.1%) | 120605                                                         |
|                                                                     | 3rd year         | 1/1012 ( <0.1%) | 120605                                                         |
|                                                                     | Overall          | 1/1452 ( <0.1%) | 120605                                                         |
| Urinary retention                                                   | 3rd year         | 1/1012 ( <0.1%) | 243937                                                         |
|                                                                     | Overall          | 1/1452 ( <0.1%) | 243937                                                         |
| Urinary tract pain                                                  | 1st year         | 1/1452 ( <0.1%) | 150121                                                         |
|                                                                     | Overall          | 1/1452 ( <0.1%) | 150121                                                         |
| Urine odour abnormal                                                | 1st year         | 1/1452 ( <0.1%) | 244128                                                         |
|                                                                     | Overall          | 1/1452 ( <0.1%) | 244128                                                         |

Table 14.3.1 / 10: Number of subjects with adverse events including subject identifier and year by treatment (FAS)  
 (cont.)

TREATMENT: LCS16

| Primary system organ class               | YEAR OF ONSET | N (%)             | subject identifier                                                             |
|------------------------------------------|---------------|-------------------|--------------------------------------------------------------------------------|
| Reproductive system and breast disorders | 1st year      | 536/1452 ( 36.9%) |                                                                                |
|                                          | 2nd year      | 257/1206 ( 21.3%) |                                                                                |
|                                          | 3rd year      | 195/1012 ( 19.3%) |                                                                                |
|                                          | Overall       | 763/1452 ( 52.5%) |                                                                                |
| Adnexa uteri pain                        | 1st year      | 3/1452 ( 0.2%)    | 140810, 241010, 241711                                                         |
|                                          | 2nd year      | 2/1206 ( 0.2%)    | 180124, 244936                                                                 |
|                                          | Overall       | 5/1452 ( 0.3%)    | 140810, 180124, 241010, 241711, 244936                                         |
| Amenorrhoea                              | 1st year      | 2/1452 ( 0.1%)    | 180518, 190206                                                                 |
|                                          | 2nd year      | 4/1206 ( 0.3%)    | 170602, 190201, 190214, 190604                                                 |
|                                          | Overall       | 6/1452 ( 0.4%)    | 170602, 180518, 190201, 190206, 190214, 190604                                 |
| Bartholin's cyst                         | 3rd year      | 1/1012 ( <0.1%)   | 120324                                                                         |
|                                          | Overall       | 1/1452 ( <0.1%)   | 120324                                                                         |
| Breast cyst                              | 2nd year      | 2/1206 ( 0.2%)    | 160977, 241546                                                                 |
|                                          | Overall       | 2/1452 ( 0.1%)    | 160977, 241546                                                                 |
| Breast discharge                         | 1st year      | 5/1452 ( 0.3%)    | 241237, 242705, 243032, 243216, 244808                                         |
|                                          | 2nd year      | 2/1206 ( 0.2%)    | 240212, 240235                                                                 |
|                                          | 3rd year      | 3/1012 ( 0.3%)    | 160919, 180509, 240626                                                         |
|                                          | Overall       | 10/1452 ( 0.7%)   | 160919, 180509, 240212, 240235, 240626, 241237, 242705, 243032, 243216, 244808 |
| Breast discomfort                        | 1st year      | 6/1452 ( 0.4%)    | 161201, 161216, 180139, 230402, 230505, 230516                                 |
|                                          | 2nd year      | 1/1206 ( <0.1%)   | 120318                                                                         |
|                                          | 3rd year      | 1/1012 ( <0.1%)   | 243215                                                                         |
|                                          | Overall       | 8/1452 ( 0.6%)    | 120318, 161201, 161216, 180139, 230402, 230505, 230516, 243215                 |
| Breast disorder female                   | 2nd year      | 1/1206 ( <0.1%)   | 245703                                                                         |
|                                          | Overall       | 1/1452 ( <0.1%)   | 245703                                                                         |
| Breast enlargement                       | 1st year      | 2/1452 ( 0.1%)    | 140101, 200707                                                                 |
|                                          | 2nd year      | 2/1206 ( 0.2%)    | 244916, 246218                                                                 |
|                                          | Overall       | 4/1452 ( 0.3%)    | 140101, 200707, 244916, 246218                                                 |

Table 14.3.1 / 10: Number of subjects with adverse events including subject identifier and year by treatment (FAS)  
 (cont.)

TREATMENT: LCS16

Primary system organ class

| Preferred term<br>MedDRA version 14.0 | YEAR OF<br>ONSET | N (%)           | subject identifier                                                                                                                                                                                                                                                                                                                                     |
|---------------------------------------|------------------|-----------------|--------------------------------------------------------------------------------------------------------------------------------------------------------------------------------------------------------------------------------------------------------------------------------------------------------------------------------------------------------|
| Breast mass                           | 1st year         | 2/1452 ( 0.1%)  | 230309, 241170                                                                                                                                                                                                                                                                                                                                         |
|                                       | 2nd year         | 3/1206 ( 0.2%)  | 243306, 243318, 244704                                                                                                                                                                                                                                                                                                                                 |
|                                       | 3rd year         | 2/1012 ( 0.2%)  | 210405, 243801                                                                                                                                                                                                                                                                                                                                         |
|                                       | Overall          | 7/1452 ( 0.5%)  | 210405, 230309, 241170, 243306, 243318, 243801, 244704                                                                                                                                                                                                                                                                                                 |
| Breast pain                           | 1st year         | 23/1452 ( 1.6%) | 120107, 120402, 120424, 120617, 140513, 140526, 150126, 150150, 150154, 160628, 170601, 170604, 190122, 200218, 200236, 200701, 200704, 200707, 200920, 241237, 241503, 244406, 245504                                                                                                                                                                 |
|                                       | 2nd year         | 11/1206 ( 0.9%) | 120337, 140119, 140810, 160760, 161534, 170408, 170602, 190603, 200704, 242321, 244113                                                                                                                                                                                                                                                                 |
|                                       | 3rd year         | 12/1012 ( 1.2%) | 150120, 160314, 160316, 161009, 170703, 190123, 190603, 200509, 200605, 200920, 242324, 243014                                                                                                                                                                                                                                                         |
|                                       | Overall          | 43/1452 ( 3.0%) | 120107, 120337, 120402, 120424, 120617, 140119, 140513, 140526, 140810, 150120, 150126, 150150, 150154, 160314, 160316, 160628, 160760, 161009, 161534, 170408, 170601, 170602, 170604, 170703, 190122, 190123, 190603, 200218, 200236, 200509, 200605, 200701, 200704, 200707, 200920, 241237, 241503, 242321, 242324, 243014, 244113, 244406, 245504 |
| Breast swelling                       | 1st year         | 2/1452 ( 0.1%)  | 140112, 243228                                                                                                                                                                                                                                                                                                                                         |
|                                       | Overall          | 2/1452 ( 0.1%)  | 140112, 243228                                                                                                                                                                                                                                                                                                                                         |
| Breast tenderness                     | 1st year         | 22/1452 ( 1.5%) | 120426, 120612, 140810, 141103, 160128, 160608, 160630, 160635, 160978, 161405, 241103, 241109, 241170, 241503, 242104, 242321, 242801, 243228, 244433, 244619, 244704, 245930                                                                                                                                                                         |
|                                       | 2nd year         | 11/1206 ( 0.9%) | 120402, 120404, 141108, 160128, 161534, 240802, 242502, 242912, 243402, 243957, 244916                                                                                                                                                                                                                                                                 |
|                                       | 3rd year         | 4/1012 ( 0.4%)  | 120233, 160128, 160950, 240626                                                                                                                                                                                                                                                                                                                         |
|                                       | Overall          | 35/1452 ( 2.4%) | 120233, 120402, 120404, 120426, 120612, 140810, 141103, 141108, 160128, 160608, 160630, 160635, 160950, 160978, 161405, 161534, 240626, 240802, 241103, 241109, 241170, 241503, 242104, 242321, 242502, 242801, 242912, 243228, 243402, 243957, 244433, 244619, 244704, 244916, 245930                                                                 |

Table 14.3.1 / 10: Number of subjects with adverse events including subject identifier and year by treatment (FAS)  
(cont.)

TREATMENT: LCS16

Primary system organ class

Preferred term

MedDRA version 14.0

Cervical cyst

YEAR OF

ONSET

N (%)

1st year

Overall

1/1452 ( &lt;0.1%)

1/1452 ( &lt;0.1%)

subject identifier

190414

190414

Table 14.3.1 / 10: Number of subjects with adverse events including subject identifier and year by treatment (FAS)  
(cont.)

TREATMENT: LCS16

| Primary system organ class<br>Preferred term<br>MedDRA version 14.0 | YEAR OF<br>ONSET | N (%)            | subject identifier                                                                                                                                                                                                                                                                                                                                                                                                                                                                                                                                                                                                      |
|---------------------------------------------------------------------|------------------|------------------|-------------------------------------------------------------------------------------------------------------------------------------------------------------------------------------------------------------------------------------------------------------------------------------------------------------------------------------------------------------------------------------------------------------------------------------------------------------------------------------------------------------------------------------------------------------------------------------------------------------------------|
| Cervical dysplasia                                                  | 1st year         | 24/1452 ( 1.7%)  | 120210, 120314, 140514, 141108, 160319, 160641, 160759, 160808, 170103, 170104, 180518, 180627, 190142, 210513, 230610, 230911, 231001, 240645, 241205, 241501, 243507, 243949, 243963, 246120                                                                                                                                                                                                                                                                                                                                                                                                                          |
|                                                                     | 2nd year         | 53/1206 ( 4.4%)  | 120408, 120426, 120635, 140509, 140512, 160326, 160332, 160523, 160752, 160902, 160961, 160986, 161020, 161223, 161321, 180413, 180417, 180517, 180521, 180723, 180737, 180738, 190624, 200215, 210103, 210601, 210604, 230516, 230810, 231011, 240208, 240212, 240220, 240605, 240620, 240807, 241031, 241101, 241230, 241412, 241543, 241709, 242211, 243014, 243316, 243507, 243703, 243813, 243949, 244926, 245513, 245918, 246127                                                                                                                                                                                  |
|                                                                     | 3rd year         | 48/1012 ( 4.7%)  | 120216, 120328, 120424, 120609, 140514, 140702, 140901, 150116, 160128, 160419, 160510, 160523, 160611, 160719, 160961, 180217, 180224, 180305, 180406, 180417, 180706, 180723, 200702, 200711, 210103, 210212, 210520, 230402, 230823, 231007, 231011, 231019, 240114, 240126, 240313, 240318, 240632, 240807, 241236, 241719, 243001, 243006, 243017, 243401, 243501, 245419, 245805, 246135                                                                                                                                                                                                                          |
|                                                                     | Overall          | 115/1452 ( 7.9%) | 120210, 120216, 120314, 120328, 120408, 120424, 120426, 120609, 120635, 140509, 140512, 140514, 140702, 140901, 141108, 150116, 160128, 160319, 160326, 160332, 160419, 160510, 160523, 160611, 160641, 160719, 160752, 160759, 160808, 160902, 160961, 160986, 161020, 161223, 161321, 170103, 170104, 180217, 180224, 180305, 180406, 180413, 180417, 180517, 180518, 180521, 180627, 180706, 180723, 180737, 180738, 190142, 190624, 200215, 200702, 200711, 210103, 210212, 210513, 210520, 210601, 210604, 230402, 230516, 230610, 230810, 230823, 230911, 231001, 231007, 231011, 231019, 240114, 240126, 240208, |

Table 14.3.1 / 10: Number of subjects with adverse events including subject identifier and year by treatment (FAS)  
 (cont.)

TREATMENT: LCS16

| Primary system organ class<br>Preferred term<br>MedDRA version 14.0 | YEAR OF<br>ONSET                                | N (%)                                                                     | subject identifier                                                                                                                                                                                                                                                                                                                                  |
|---------------------------------------------------------------------|-------------------------------------------------|---------------------------------------------------------------------------|-----------------------------------------------------------------------------------------------------------------------------------------------------------------------------------------------------------------------------------------------------------------------------------------------------------------------------------------------------|
|                                                                     |                                                 |                                                                           | 240212, 240220, 240313, 240318, 240605, 240620,<br>240632, 240645, 240807, 241031, 241101, 241205,<br>241230, 241236, 241412, 241501, 241543, 241709,<br>241719, 242211, 243001, 243006, 243014, 243017,<br>243316,<br>243401, 243501, 243507, 243703, 243813, 243949,<br>243963, 244926, 245419, 245513, 245805, 245918,<br>246120, 246127, 246135 |
| Cervical friability                                                 | 2nd year<br>Overall                             | 1/1206 ( <0.1%)<br>1/1452 ( <0.1%)                                        | 200632<br>200632                                                                                                                                                                                                                                                                                                                                    |
| Cervical polyp                                                      | 3rd year<br>Overall                             | 2/1012 ( 0.2%)<br>2/1452 ( 0.1%)                                          | 200507, 244501<br>200507, 244501                                                                                                                                                                                                                                                                                                                    |
| Cervix disorder                                                     | 1st year<br>Overall                             | 1/1452 ( <0.1%)<br>1/1452 ( <0.1%)                                        | 160702<br>160702                                                                                                                                                                                                                                                                                                                                    |
| Cervix erythema                                                     | 1st year<br>3rd year<br>Overall                 | 1/1452 ( <0.1%)<br>1/1012 ( <0.1%)<br>2/1452 ( 0.1%)                      | 140818<br>140805<br>140805, 140818                                                                                                                                                                                                                                                                                                                  |
| Cervix haemorrhage uterine                                          | 1st year<br>Overall                             | 1/1452 ( <0.1%)<br>1/1452 ( <0.1%)                                        | 160562<br>160562                                                                                                                                                                                                                                                                                                                                    |
| Cervix oedema                                                       | 2nd year<br>Overall                             | 1/1206 ( <0.1%)<br>1/1452 ( <0.1%)                                        | 243017<br>243017                                                                                                                                                                                                                                                                                                                                    |
| Coital bleeding                                                     | 1st year<br><br>2nd year<br>3rd year<br>Overall | 7/1452 ( 0.5%)<br><br>4/1206 ( 0.3%)<br>3/1012 ( 0.3%)<br>14/1452 ( 1.0%) | 140112, 140504, 161009, 200529, 244435, 244802,<br>245507<br>160332, 200902, 230707, 245505<br>230717, 242811, 243229<br>140112, 140504, 160332, 161009, 200529, 200902,<br>230707, 230717, 242811, 243229, 244435, 244802,<br>245505, 245507                                                                                                       |



Table 14.3.1 / 10: Number of subjects with adverse events including subject identifier and year by treatment (FAS)  
 (cont.)

TREATMENT: LCS16

| Primary system organ class     | YEAR OF  |                 | subject identifier             |
|--------------------------------|----------|-----------------|--------------------------------|
| Preferred term                 | ONSET    | N (%)           |                                |
| MedDRA version 14.0            |          |                 |                                |
| Dysfunctional uterine bleeding | 1st year | 3/1452 ( 0.2%)  | 161405, 244113, 246102         |
|                                | 2nd year | 1/1206 ( <0.1%) | 242317                         |
|                                | Overall  | 4/1452 ( 0.3%)  | 161405, 242317, 244113, 246102 |

Table 14.3.1 / 10: Number of subjects with adverse events including subject identifier and year by treatment (FAS)  
 (cont.)

TREATMENT: LCS16

Primary system organ class

| Preferred term<br>MedDRA version 14.0 | YEAR OF<br>ONSET | N (%)            | subject identifier                                                                                                                                                                                                                                                                                                                                                                                                                                                                                                                                                                                                      |
|---------------------------------------|------------------|------------------|-------------------------------------------------------------------------------------------------------------------------------------------------------------------------------------------------------------------------------------------------------------------------------------------------------------------------------------------------------------------------------------------------------------------------------------------------------------------------------------------------------------------------------------------------------------------------------------------------------------------------|
| Dysmenorrhoea                         | 1st year         | 75/1452 ( 5.2%)  | 120309, 120313, 120402, 120606, 120609, 120612, 120614, 140214, 140818, 141420, 150103, 150147, 160107, 160303, 160307, 160314, 160332, 160417, 160603, 160706, 160723, 160760, 160802, 160920, 160929, 161019, 161108, 161118, 161123, 161131, 161315, 161321, 161415, 161434, 161502, 190206, 190227, 200103, 200513, 200609, 200617, 200620, 200630, 200632, 200930, 210102, 210113, 210115, 210133, 210605, 230319, 230402, 230614, 230708, 230811, 230815, 230820, 230823, 230916, 240618, 240633, 241555, 241711, 241716, 243819, 243827, 244130, 244406, 244410, 244429, 244517, 244609, 245412, 245515, 245909  |
|                                       | 2nd year         | 26/1206 ( 2.2%)  | 120334, 120415, 140524, 140805, 160603, 160611, 160636, 160728, 160744, 160760, 161118, 161309, 161526, 190201, 190213, 200633, 200711, 210513, 242317, 242502, 242704, 243401, 243819, 243977, 244614, 246123                                                                                                                                                                                                                                                                                                                                                                                                          |
|                                       | 3rd year         | 14/1012 ( 1.4%)  | 120328, 120334, 120616, 160744, 190227, 200509, 200510, 210405, 241546, 244401, 244437, 244805, 245507, 246120                                                                                                                                                                                                                                                                                                                                                                                                                                                                                                          |
|                                       | Overall          | 108/1452 ( 7.4%) | 120309, 120313, 120328, 120334, 120402, 120415, 120606, 120609, 120612, 120614, 120616, 140214, 140524, 140805, 140818, 141420, 150103, 150147, 160107, 160303, 160307, 160314, 160332, 160417, 160603, 160611, 160636, 160706, 160723, 160728, 160744, 160760, 160802, 160920, 160929, 161019, 161108, 161118, 161123, 161131, 161309, 161315, 161321, 161415, 161434, 161502, 161526, 190201, 190206, 190213, 190227, 200103, 200509, 200510, 200513, 200609, 200617, 200620, 200630, 200632, 200633, 200711, 200930, 210102, 210113, 210115, 210133, 210405, 210513, 210605, 230319, 230402, 230614, 230708, 230811, |

Table 14.3.1 / 10: Number of subjects with adverse events including subject identifier and year by treatment (FAS)  
 (cont.)

TREATMENT: LCS16

| Primary system organ class<br>Preferred term<br>MedDRA version 14.0 | YEAR OF<br>ONSET |  | N (%)           | subject identifier                                                                                                                                                                                                                                                                       |
|---------------------------------------------------------------------|------------------|--|-----------------|------------------------------------------------------------------------------------------------------------------------------------------------------------------------------------------------------------------------------------------------------------------------------------------|
|                                                                     |                  |  |                 | 230815, 230820, 230823, 230916, 240618, 240633,<br>241546, 241555, 241711, 241716, 242317, 242502,<br>242704, 243401, 243819, 243827, 243977, 244130,<br>244401, 244406, 244410, 244429, 244437, 244517,<br>244609,<br>244614, 244805, 245412, 245507, 245515, 245909,<br>246120, 246123 |
| Dyspareunia                                                         | 1st year         |  | 18/1452 ( 1.2%) | 140112, 140805, 141111, 150102, 150150, 160719,<br>161432, 200707, 200906, 200917, 200928, 241522,<br>242317, 242817, 244106, 244505, 245030, 245513                                                                                                                                     |
|                                                                     | 2nd year         |  | 6/1206 ( 0.5%)  | 120230, 140526, 190214, 190603, 230801, 242918                                                                                                                                                                                                                                           |
|                                                                     | 3rd year         |  | 4/1012 ( 0.4%)  | 140804, 150114, 161530, 230106                                                                                                                                                                                                                                                           |
|                                                                     | Overall          |  | 28/1452 ( 1.9%) | 120230, 140112, 140526, 140804, 140805, 141111,<br>150102, 150114, 150150, 160719, 161432, 161530,<br>190214, 190603, 200707, 200906, 200917, 200928,<br>230106, 230801, 241522, 242317, 242817, 242918,<br>244106,<br>244505, 245030, 245513                                            |
| Ectropion of cervix                                                 | 1st year         |  | 1/1452 (<0.1%)  | 190109                                                                                                                                                                                                                                                                                   |
|                                                                     | Overall          |  | 1/1452 (<0.1%)  | 190109                                                                                                                                                                                                                                                                                   |
| Endometriosis                                                       | 1st year         |  | 1/1452 (<0.1%)  | 200606                                                                                                                                                                                                                                                                                   |
|                                                                     | 2nd year         |  | 1/1206 (<0.1%)  | 190622                                                                                                                                                                                                                                                                                   |
|                                                                     | 3rd year         |  | 1/1012 (<0.1%)  | 160533                                                                                                                                                                                                                                                                                   |
|                                                                     | Overall          |  | 3/1452 ( 0.2%)  | 160533, 190622, 200606                                                                                                                                                                                                                                                                   |
| Fibrocystic breast disease                                          | 1st year         |  | 1/1452 (<0.1%)  | 241524                                                                                                                                                                                                                                                                                   |
|                                                                     | 2nd year         |  | 3/1206 ( 0.2%)  | 241809, 242801, 244128                                                                                                                                                                                                                                                                   |
|                                                                     | 3rd year         |  | 1/1012 (<0.1%)  | 241731                                                                                                                                                                                                                                                                                   |
|                                                                     | Overall          |  | 5/1452 ( 0.3%)  | 241524, 241731, 241809, 242801, 244128                                                                                                                                                                                                                                                   |
| Galactorrhoea                                                       | 1st year         |  | 5/1452 ( 0.3%)  | 190134, 241524, 244002, 244808, 245801                                                                                                                                                                                                                                                   |
|                                                                     | 2nd year         |  | 1/1206 (<0.1%)  | 160521                                                                                                                                                                                                                                                                                   |
|                                                                     | 3rd year         |  | 2/1012 ( 0.2%)  | 150120, 161432                                                                                                                                                                                                                                                                           |
|                                                                     | Overall          |  | 8/1452 ( 0.6%)  | 150120, 160521, 161432, 190134, 241524, 244002,<br>244808, 245801                                                                                                                                                                                                                        |

Table 14.3.1 / 10: Number of subjects with adverse events including subject identifier and year by treatment (FAS)  
 (cont.)

TREATMENT: LCS16

| Primary system organ class<br>Preferred term<br>MedDRA version 14.0 | YEAR OF<br>ONSET | N (%)           | subject identifier                                                                                                                                     |
|---------------------------------------------------------------------|------------------|-----------------|--------------------------------------------------------------------------------------------------------------------------------------------------------|
| Genital cyst                                                        | 1st year         | 1/1452 ( <0.1%) | 180625                                                                                                                                                 |
|                                                                     | Overall          | 1/1452 ( <0.1%) | 180625                                                                                                                                                 |
| Genital discharge                                                   | 1st year         | 4/1452 ( 0.3%)  | 140810, 160521, 160570, 160703                                                                                                                         |
|                                                                     | 2nd year         | 5/1206 ( 0.4%)  | 140106, 150118, 150120, 190202, 190206                                                                                                                 |
|                                                                     | Overall          | 9/1452 ( 0.6%)  | 140106, 140810, 150118, 150120, 160521, 160570, 160703, 190202, 190206                                                                                 |
| Genital rash                                                        | 2nd year         | 1/1206 ( <0.1%) | 243504                                                                                                                                                 |
|                                                                     | Overall          | 1/1452 ( <0.1%) | 243504                                                                                                                                                 |
| Haemorrhagic ovarian cyst                                           | 1st year         | 11/1452 ( 0.8%) | 120101, 120102, 150121, 160612, 200902, 240524, 241030, 241509, 242702, 244606, 244926                                                                 |
|                                                                     | 2nd year         | 4/1206 ( 0.3%)  | 120402, 240523, 243313, 245918                                                                                                                         |
|                                                                     | 3rd year         | 4/1012 ( 0.4%)  | 190114, 190134, 241705, 242803                                                                                                                         |
|                                                                     | Overall          | 19/1452 ( 1.3%) | 120101, 120102, 120402, 150121, 160612, 190114, 190134, 200902, 240523, 240524, 241030, 241509, 241705, 242702, 242803, 243313, 244606, 244926, 245918 |
| Hypomenorrhoea                                                      | 3rd year         | 1/1012 ( <0.1%) | 190212                                                                                                                                                 |
|                                                                     | Overall          | 1/1452 ( <0.1%) | 190212                                                                                                                                                 |
| Menorrhagia                                                         | 1st year         | 9/1452 ( 0.6%)  | 150147, 161402, 200609, 200630, 200917, 210102, 241179, 241501, 243944                                                                                 |
|                                                                     | 3rd year         | 1/1012 ( <0.1%) | 200301                                                                                                                                                 |
|                                                                     | Overall          | 10/1452 ( 0.7%) | 150147, 161402, 200301, 200609, 200630, 200917, 210102, 241179, 241501, 243944                                                                         |
| Menstrual disorder                                                  | 3rd year         | 1/1012 ( <0.1%) | 244437                                                                                                                                                 |
|                                                                     | Overall          | 1/1452 ( <0.1%) | 244437                                                                                                                                                 |
| Menstruation irregular                                              | 1st year         | 3/1452 ( 0.2%)  | 160433, 200514, 243957                                                                                                                                 |
|                                                                     | Overall          | 3/1452 ( 0.2%)  | 160433, 200514, 243957                                                                                                                                 |

Table 14.3.1 / 10: Number of subjects with adverse events including subject identifier and year by treatment (FAS)  
 (cont.)

TREATMENT: LCS16

| Primary system organ class<br>Preferred term<br>MedDRA version 14.0 | YEAR OF<br>ONSET |                 | subject identifier                                                                                |
|---------------------------------------------------------------------|------------------|-----------------|---------------------------------------------------------------------------------------------------|
|                                                                     |                  | N (%)           |                                                                                                   |
| Metrorrhagia                                                        | 1st year         | 10/1452 ( 0.7%) | 120406, 120408, 150102, 161415, 170301, 210517,<br>230907, 242301, 243013, 243029                 |
|                                                                     | 2nd year         | 1/1206 (<0.1%)  | 245505                                                                                            |
|                                                                     | 3rd year         | 1/1012 (<0.1%)  | 244401                                                                                            |
|                                                                     | Overall          | 12/1452 ( 0.8%) | 120406, 120408, 150102, 161415, 170301, 210517,<br>230907, 242301, 243013, 243029, 244401, 245505 |
| Nipple exudate bloody                                               | 3rd year         | 1/1012 (<0.1%)  | 161009                                                                                            |
|                                                                     | Overall          | 1/1452 (<0.1%)  | 161009                                                                                            |
| Nipple pain                                                         | 1st year         | 1/1452 (<0.1%)  | 141108                                                                                            |
|                                                                     | 2nd year         | 1/1206 (<0.1%)  | 160737                                                                                            |
|                                                                     | Overall          | 2/1452 ( 0.1%)  | 141108, 160737                                                                                    |
| Oligomenorrhoea                                                     | 1st year         | 2/1452 ( 0.1%)  | 245524, 245530                                                                                    |
|                                                                     | Overall          | 2/1452 ( 0.1%)  | 245524, 245530                                                                                    |

Table 14.3.1 / 10: Number of subjects with adverse events including subject identifier and year by treatment (FAS)  
 (cont.)

TREATMENT: LCS16

Primary system organ class

Preferred term

MedDRA version 14.0

Ovarian cyst

YEAR OF

ONSET

N (%)

1st year

204/1452 ( 14.0%)

subject identifier

120229, 120237, 120241, 120306, 120317, 120333,  
 120334, 120402, 120405, 120603, 120605, 120612,  
 120627, 120629, 120631, 140223, 140603, 140704,  
 140810, 140906, 140916, 141003, 150116, 150140,  
 150141,  
 150504, 160107, 160116, 160211, 160312, 160315,  
 160326, 160411, 160412, 160441, 160517, 160533,  
 160549, 160553, 160563, 160608, 160611, 160632,  
 160641, 160735, 160761, 160802, 160808, 160901,  
 160919,  
 160921, 160932, 160950, 161004, 161008, 161009,  
 161025, 161116, 161128, 161217, 161315, 161320,  
 161502, 161503, 161510, 161524, 170301, 170303,  
 170308, 170601, 170602, 180124, 180333, 180640,  
 180667,  
 180720, 180732, 190108, 190109, 190114, 190129,  
 190202, 190212, 190213, 190214, 190607, 190622,  
 190640, 200118, 200203, 200212, 200217, 200229,  
 200305, 200509, 200514, 200704, 200902, 210115,  
 210206,  
 230203, 230209, 230215, 230301, 230319, 230409,  
 230414, 230505, 230609, 230612, 230807, 230814,  
 230915, 231019, 231020, 231104, 231109, 240114,  
 240213, 240303, 240305, 240325, 240331, 240343,  
 240369,  
 240504, 240511, 240624, 240626, 240631, 240632,  
 240633, 240645, 240722, 240727, 240833, 240906,  
 241010, 241029, 241101, 241103, 241114, 241117,  
 241125, 241147, 241189, 241220, 241236, 241301,  
 241402,  
 241430, 241501, 241508, 241509, 241511, 241529,  
 241533, 241537, 241608, 241703, 241709, 241711,  
 241716, 241719, 241726, 242310, 242317, 242321,  
 242803, 242904, 242908, 242911, 243321, 243331,  
 243407,  
 243601, 243615, 243717, 243801, 243804, 243822,  
 243833, 243906, 243923, 243954, 243959, 244113,  
 244120, 244202, 244303, 244406, 244451, 244514,  
 244802, 244805, 244925, 245002, 245409, 245524,  
 245801,  
 245925, 245926, 246127, 246146

Table 14.3.1 / 10: Number of subjects with adverse events including subject identifier and year by treatment (FAS)  
(cont.)

TREATMENT: LCS16

| Primary system organ class<br>Preferred term<br>MedDRA version 14.0 | YEAR OF<br>ONSET | N (%)             | subject identifier                                                                                                                                                                                                                                                                                                                                                                                                                                                                                                                                                                                                                                                          |
|---------------------------------------------------------------------|------------------|-------------------|-----------------------------------------------------------------------------------------------------------------------------------------------------------------------------------------------------------------------------------------------------------------------------------------------------------------------------------------------------------------------------------------------------------------------------------------------------------------------------------------------------------------------------------------------------------------------------------------------------------------------------------------------------------------------------|
|                                                                     | 2nd year         | 76/1206 ( 6.3%)   | 120102, 120107, 120410, 120426, 120605, 120617,<br>140110, 140120, 140704, 140902, 140906, 141411,<br>150201, 150211, 160533, 160545, 160549, 160608,<br>160628, 160642, 160703, 160745, 160956, 161025,<br>161306,<br>161320, 170604, 180212, 180431, 180732, 190108,<br>190113, 190212, 190408, 190607, 190640, 200215,<br>200217, 200301, 200410, 200507, 200707, 210410,<br>230204, 230211, 230414, 230705, 230707, 231113,<br>240106,<br>240240, 240523, 240840, 241020, 241030, 241117,<br>241145, 241155, 241197, 241230, 241550, 241705,<br>242310, 242324, 242904, 243815, 243827, 243911,<br>243957, 243960, 243971, 244446, 244936, 245908,<br>246123,<br>246127 |
|                                                                     | 3rd year         | 71/1012 ( 7.0%)   | 120302, 120333, 120410, 120605, 120607, 120616,<br>140216, 141003, 150141, 150504, 160128, 160546,<br>160549, 160563, 160735, 160747, 161204, 161222,<br>161310, 161524, 161534, 170308, 180115, 180117,<br>180404,<br>190108, 190213, 190227, 190414, 190603, 190611,<br>190622, 200218, 200302, 200605, 200711, 200930,<br>210128, 230222, 230301, 230614, 230705, 230810,<br>240235, 240307, 240325, 240511, 241020, 241140,<br>241145,<br>241236, 241508, 241537, 241543, 241546, 241603,<br>241719, 242803, 242908, 243225, 243604, 243911,<br>243967, 244303, 244305, 245428, 245504, 245517,<br>245522, 246135, 246219                                               |
|                                                                     | Overall          | 304/1452 ( 20.9%) | 120102, 120107, 120229, 120237, 120241, 120302,<br>120306, 120317, 120333, 120334, 120402, 120405,<br>120410, 120426, 120603, 120605, 120607, 120612,<br>120616, 120617, 120627, 120629, 120631, 140110,<br>140120,<br>140216, 140223, 140603, 140704, 140810, 140902,<br>140906, 140916, 141003, 141411, 150116, 150140,<br>150141, 150201, 150211, 150504, 160107, 160116,<br>160128, 160211, 160312, 160315, 160326, 160411,<br>160412,                                                                                                                                                                                                                                  |

Table 14.3.1 / 10: Number of subjects with adverse events including subject identifier and year by treatment (FAS)  
 (cont.)

TREATMENT: LCS16

Primary system organ class

Preferred term

MedDRA version 14.0

YEAR OF

ONSET

N (%)

subject identifier

160441, 160517, 160533, 160545, 160546, 160549,  
 160553, 160563, 160608, 160611, 160628, 160632,  
 160641, 160642, 160703, 160735, 160745, 160747,  
 160761, 160802, 160808, 160901, 160919, 160921,  
 160932,  
 160950, 160956, 161004, 161008, 161009, 161025,  
 161116, 161128, 161204, 161217, 161222, 161306,  
 161310, 161315, 161320, 161502, 161503, 161510,  
 161524, 161534, 170301, 170303, 170308, 170601,  
 170602,  
 170604, 180115, 180117, 180124, 180212, 180333,  
 180404, 180431, 180640, 180667, 180720, 180732,  
 190108, 190109, 190113, 190114, 190129, 190202,  
 190212, 190213, 190214, 190227, 190408, 190414,  
 190603,  
 190607, 190611, 190622, 190640, 200118, 200203,  
 200212, 200215, 200217, 200218, 200229, 200301,  
 200302, 200305, 200410, 200507, 200509, 200514,  
 200605, 200704, 200707, 200711, 200902, 200930,  
 210115,  
 210128, 210206, 210410, 230203, 230204, 230209,  
 230211, 230215, 230222, 230301, 230319, 230409,  
 230414, 230505, 230609, 230612, 230614, 230705,  
 230707, 230807, 230810, 230814, 230915, 231019,  
 231020,  
 231104, 231109, 231113, 240106, 240114, 240213,  
 240235, 240240, 240303, 240305, 240307, 240325,  
 240331, 240343, 240369, 240504, 240511, 240523,  
 240624, 240626, 240631, 240632, 240633, 240645,  
 240722,  
 240727, 240833, 240840, 240906, 241010, 241020,  
 241029, 241030, 241101, 241103, 241114, 241117,  
 241125, 241140, 241145, 241147, 241155, 241189,  
 241197, 241220, 241230, 241236, 241301, 241402,  
 241430,  
 241501, 241508, 241509, 241511, 241529, 241533,  
 241537, 241543, 241546, 241550, 241603, 241608,  
 241703, 241705, 241709, 241711, 241716, 241719,  
 241726, 242310, 242317, 242321, 242324, 242803,  
 242904,



Table 14.3.1 / 10: Number of subjects with adverse events including subject identifier and year by treatment (FAS)  
 (cont.)

TREATMENT: LCS16

| Primary system organ class<br>Preferred term<br>MedDRA version 14.0 | YEAR OF<br>ONSET |  | N (%)           | subject identifier                                                                                                                                                                                                                                                                                                                                                                                                                                                           |
|---------------------------------------------------------------------|------------------|--|-----------------|------------------------------------------------------------------------------------------------------------------------------------------------------------------------------------------------------------------------------------------------------------------------------------------------------------------------------------------------------------------------------------------------------------------------------------------------------------------------------|
|                                                                     |                  |  |                 | 242908, 242911, 243225, 243321, 243331, 243407,<br>243601, 243604, 243615, 243717, 243801, 243804,<br>243815, 243822, 243827, 243833, 243906, 243911,<br>243923, 243954, 243957, 243959, 243960, 243967,<br>243971,<br>244113, 244120, 244202, 244303, 244305, 244406,<br>244446, 244451, 244514, 244802, 244805, 244925,<br>244936, 245002, 245409, 245428, 245504, 245517,<br>245522, 245524, 245801, 245908, 245925, 245926,<br>246123,<br>246127, 246135, 246146, 246219 |
| Ovarian cyst ruptured                                               | 1st year         |  | 6/1452 ( 0.4%)  | 140801, 160211, 161217, 240133, 241511, 246135                                                                                                                                                                                                                                                                                                                                                                                                                               |
|                                                                     | 2nd year         |  | 1/1206 ( <0.1%) | 244936                                                                                                                                                                                                                                                                                                                                                                                                                                                                       |
|                                                                     | Overall          |  | 7/1452 ( 0.5%)  | 140801, 160211, 161217, 240133, 241511, 244936,<br>246135                                                                                                                                                                                                                                                                                                                                                                                                                    |
| Ovarian cyst torsion                                                | 1st year         |  | 1/1452 ( <0.1%) | 190202                                                                                                                                                                                                                                                                                                                                                                                                                                                                       |
|                                                                     | Overall          |  | 1/1452 ( <0.1%) | 190202                                                                                                                                                                                                                                                                                                                                                                                                                                                                       |
| Ovarian disorder                                                    | 3rd year         |  | 1/1012 ( <0.1%) | 160563                                                                                                                                                                                                                                                                                                                                                                                                                                                                       |
|                                                                     | Overall          |  | 1/1452 ( <0.1%) | 160563                                                                                                                                                                                                                                                                                                                                                                                                                                                                       |
| Ovarian enlargement                                                 | 2nd year         |  | 1/1206 ( <0.1%) | 244936                                                                                                                                                                                                                                                                                                                                                                                                                                                                       |
|                                                                     | Overall          |  | 1/1452 ( <0.1%) | 244936                                                                                                                                                                                                                                                                                                                                                                                                                                                                       |
| Ovarian mass                                                        | 2nd year         |  | 2/1206 ( 0.2%)  | 243815, 244406                                                                                                                                                                                                                                                                                                                                                                                                                                                               |
|                                                                     | Overall          |  | 2/1452 ( 0.1%)  | 243815, 244406                                                                                                                                                                                                                                                                                                                                                                                                                                                               |
| Ovulation pain                                                      | 1st year         |  | 2/1452 ( 0.1%)  | 230909, 244505                                                                                                                                                                                                                                                                                                                                                                                                                                                               |
|                                                                     | Overall          |  | 2/1452 ( 0.1%)  | 230909, 244505                                                                                                                                                                                                                                                                                                                                                                                                                                                               |
| Pelvic adhesions                                                    | 3rd year         |  | 1/1012 ( <0.1%) | 180117                                                                                                                                                                                                                                                                                                                                                                                                                                                                       |
|                                                                     | Overall          |  | 1/1452 ( <0.1%) | 180117                                                                                                                                                                                                                                                                                                                                                                                                                                                                       |
| Pelvic discomfort                                                   | 2nd year         |  | 1/1206 ( <0.1%) | 241008                                                                                                                                                                                                                                                                                                                                                                                                                                                                       |
|                                                                     | 3rd year         |  | 1/1012 ( <0.1%) | 240303                                                                                                                                                                                                                                                                                                                                                                                                                                                                       |
|                                                                     | Overall          |  | 2/1452 ( 0.1%)  | 240303, 241008                                                                                                                                                                                                                                                                                                                                                                                                                                                               |

Table 14.3.1 / 10: Number of subjects with adverse events including subject identifier and year by treatment (FAS)  
 (cont.)

TREATMENT: LCS16

Primary system organ class

| Preferred term<br>MedDRA version 14.0 | YEAR OF<br>ONSET | N (%)            | subject identifier                                                                                                                                                                                                                                                                                                                                                                                                                                                                                                                                                                                                                                                                                                                                                                                     |
|---------------------------------------|------------------|------------------|--------------------------------------------------------------------------------------------------------------------------------------------------------------------------------------------------------------------------------------------------------------------------------------------------------------------------------------------------------------------------------------------------------------------------------------------------------------------------------------------------------------------------------------------------------------------------------------------------------------------------------------------------------------------------------------------------------------------------------------------------------------------------------------------------------|
| Pelvic pain                           | 1st year         | 97/1452 ( 6.7%)  | 120210, 120221, 120325, 120328, 120334, 120420, 120606, 120612, 120614, 120615, 120616, 120617, 120622, 120629, 140223, 141015, 150102, 150116, 150118, 150120, 150140, 150141, 150146, 150150, 150161, 150162, 150164, 150504, 160568, 160727, 160730, 160731, 160760, 160761, 160762, 161009, 161103, 161118, 161119, 161123, 161128, 161213, 161216, 161217, 161222, 161226, 170305, 170412, 170601, 200206, 200220, 200907, 200925, 200928, 210210, 230108, 230121, 230202, 230305, 230708, 230718, 230909, 240315, 240524, 240805, 240833, 241107, 241114, 241147, 241179, 241189, 241509, 241529, 241555, 242104, 242306, 242702, 242914, 242915, 243014, 243029, 243216, 243402, 243802, 243905, 243944, 244432, 244449, 244706, 244922, 244926, 245511, 245515, 245524, 246103, 246146, 246207 |
|                                       | 2nd year         | 24/1206 ( 2.0%)  | 120328, 120617, 141007, 150141, 150201, 160716, 160730, 170412, 190603, 190604, 200515, 230705, 241020, 241139, 241509, 241726, 242104, 242904, 243957, 244429, 244936, 245918, 246201, 246207                                                                                                                                                                                                                                                                                                                                                                                                                                                                                                                                                                                                         |
|                                       | 3rd year         | 12/1012 ( 1.2%)  | 160737, 160761, 161118, 180304, 242222, 242908, 243229, 244517, 245507, 246117, 246127, 246134                                                                                                                                                                                                                                                                                                                                                                                                                                                                                                                                                                                                                                                                                                         |
|                                       | Overall          | 123/1452 ( 8.5%) | 120210, 120221, 120325, 120328, 120334, 120420, 120606, 120612, 120614, 120615, 120616, 120617, 120622, 120629, 140223, 141007, 141015, 150102, 150116, 150118, 150120, 150140, 150141, 150146, 150150, 150161, 150162, 150164, 150201, 150504, 160568, 160716, 160727, 160730, 160731, 160737, 160760, 160761, 160762, 161009, 161103, 161118, 161119, 161123, 161128, 161213, 161216, 161217, 161222, 161226, 170305, 170412, 170601, 180304, 190603, 190604, 200206, 200220, 200515, 200907, 200925, 200928, 210210, 230108, 230121, 230202, 230305, 230705, 230708, 230718, 230909, 240315, 240524, 240805, 240833,                                                                                                                                                                                |
|                                       |                  |                  |                                                                                                                                                                                                                                                                                                                                                                                                                                                                                                                                                                                                                                                                                                                                                                                                        |

Table 14.3.1 / 10: Number of subjects with adverse events including subject identifier and year by treatment (FAS)  
 (cont.)

TREATMENT: LCS16

| Primary system organ class<br>Preferred term<br>MedDRA version 14.0 | YEAR OF<br>ONSET |  | N (%)           | subject identifier                                                                                                                                                                                                                                                                                                                                                                                                     |
|---------------------------------------------------------------------|------------------|--|-----------------|------------------------------------------------------------------------------------------------------------------------------------------------------------------------------------------------------------------------------------------------------------------------------------------------------------------------------------------------------------------------------------------------------------------------|
|                                                                     |                  |  |                 | 241020, 241107, 241114, 241139, 241147, 241179,<br>241189, 241509, 241529, 241555, 241726, 242104,<br>242222, 242306, 242702, 242904, 242908, 242914,<br>242915, 243014, 243029, 243216, 243229, 243402,<br>243802,<br>243905, 243944, 243957, 244429, 244432, 244449,<br>244517, 244706, 244922, 244926, 244936, 245507,<br>245511, 245515, 245524, 245918, 246103, 246117,<br>246127, 246134, 246146, 246201, 246207 |
| Polycystic ovaries                                                  | 1st year         |  | 1/1452 ( <0.1%) | 150504                                                                                                                                                                                                                                                                                                                                                                                                                 |
|                                                                     | 2nd year         |  | 1/1206 ( <0.1%) | 241722                                                                                                                                                                                                                                                                                                                                                                                                                 |
|                                                                     | Overall          |  | 2/1452 ( 0.1%)  | 150504, 241722                                                                                                                                                                                                                                                                                                                                                                                                         |
| Polymenorrhoea                                                      | 2nd year         |  | 1/1206 ( <0.1%) | 240113                                                                                                                                                                                                                                                                                                                                                                                                                 |
|                                                                     | Overall          |  | 1/1452 ( <0.1%) | 240113                                                                                                                                                                                                                                                                                                                                                                                                                 |
| Premenstrual syndrome                                               | 1st year         |  | 8/1452 ( 0.6%)  | 160921, 161019, 200507, 200522, 210605, 230309,<br>230911, 241537                                                                                                                                                                                                                                                                                                                                                      |
|                                                                     | 2nd year         |  | 2/1206 ( 0.2%)  | 160728, 244703                                                                                                                                                                                                                                                                                                                                                                                                         |
|                                                                     | 3rd year         |  | 2/1012 ( 0.2%)  | 160942, 244437                                                                                                                                                                                                                                                                                                                                                                                                         |
|                                                                     | Overall          |  | 12/1452 ( 0.8%) | 160728, 160921, 160942, 161019, 200507, 200522,<br>210605, 230309, 230911, 241537, 244437, 244703                                                                                                                                                                                                                                                                                                                      |
| Uterine haemorrhage                                                 | 1st year         |  | 4/1452 ( 0.3%)  | 240501, 240515, 240730, 244802                                                                                                                                                                                                                                                                                                                                                                                         |
|                                                                     | 2nd year         |  | 2/1206 ( 0.2%)  | 170803, 246123                                                                                                                                                                                                                                                                                                                                                                                                         |
|                                                                     | 3rd year         |  | 1/1012 ( <0.1%) | 240502                                                                                                                                                                                                                                                                                                                                                                                                                 |
|                                                                     | Overall          |  | 7/1452 ( 0.5%)  | 170803, 240501, 240502, 240515, 240730, 244802,<br>246123                                                                                                                                                                                                                                                                                                                                                              |
| Uterine inflammation                                                | 2nd year         |  | 1/1206 ( <0.1%) | 180212                                                                                                                                                                                                                                                                                                                                                                                                                 |
|                                                                     | Overall          |  | 1/1452 ( <0.1%) | 180212                                                                                                                                                                                                                                                                                                                                                                                                                 |
| Uterine pain                                                        | 1st year         |  | 2/1452 ( 0.1%)  | 210122, 243963                                                                                                                                                                                                                                                                                                                                                                                                         |
|                                                                     | Overall          |  | 2/1452 ( 0.1%)  | 210122, 243963                                                                                                                                                                                                                                                                                                                                                                                                         |
| Uterine polyp                                                       | 3rd year         |  | 1/1012 ( <0.1%) | 160531                                                                                                                                                                                                                                                                                                                                                                                                                 |
|                                                                     | Overall          |  | 1/1452 ( <0.1%) | 160531                                                                                                                                                                                                                                                                                                                                                                                                                 |

Table 14.3.1 / 10: Number of subjects with adverse events including subject identifier and year by treatment (FAS)  
(cont.)

TREATMENT: LCS16

| Primary system organ class | YEAR OF ONSET | N (%)           | subject identifier                                                                                                                                                                                                                                                                                                     |
|----------------------------|---------------|-----------------|------------------------------------------------------------------------------------------------------------------------------------------------------------------------------------------------------------------------------------------------------------------------------------------------------------------------|
| Preferred term             |               |                 |                                                                                                                                                                                                                                                                                                                        |
| MedDRA version 14.0        |               |                 |                                                                                                                                                                                                                                                                                                                        |
| Uterine spasm              | 1st year      | 37/1452 ( 2.5%) | 161401, 161402, 161404, 161405, 161412, 161415, 161417, 161419, 161422, 161423, 161429, 161430, 161432, 161433, 161434, 170408, 200305, 210405, 230203, 241301, 241310, 242703, 242704, 242810, 242814, 243406, 243601, 243823, 243921, 243932, 244429, 244525, 244606, 244612, 244712, 244801, 244804                 |
|                            | 3rd year      | 2/1012 ( 0.2%)  | 240235, 243407                                                                                                                                                                                                                                                                                                         |
|                            | Overall       | 39/1452 ( 2.7%) | 161401, 161402, 161404, 161405, 161412, 161415, 161417, 161419, 161422, 161423, 161429, 161430, 161432, 161433, 161434, 170408, 200305, 210405, 230203, 240235, 241301, 241310, 242703, 242704, 242810, 242814, 243406, 243407, 243601, 243823, 243921, 243932, 244429, 244525, 244606, 244612, 244712, 244801, 244804 |
| Uterine tenderness         | 1st year      | 2/1452 ( 0.1%)  | 242915, 242918                                                                                                                                                                                                                                                                                                         |
|                            | Overall       | 2/1452 ( 0.1%)  | 242915, 242918                                                                                                                                                                                                                                                                                                         |

Table 14.3.1 / 10: Number of subjects with adverse events including subject identifier and year by treatment (FAS)  
 (cont.)

TREATMENT: LCS16

Primary system organ class

| Preferred term<br>MedDRA version 14.0 | YEAR OF<br>ONSET | N (%)           | subject identifier                                                                                                                                                                                                                                                                                                                                                                                                                                                             |
|---------------------------------------|------------------|-----------------|--------------------------------------------------------------------------------------------------------------------------------------------------------------------------------------------------------------------------------------------------------------------------------------------------------------------------------------------------------------------------------------------------------------------------------------------------------------------------------|
| Vaginal discharge                     | 1st year         | 33/1452 ( 2.3%) | 120102, 120226, 120302, 120306, 120317, 120336, 120402, 120405, 120607, 120614, 120616, 120618, 120627, 120631, 140610, 140720, 141002, 160916, 180133, 180663, 200206, 200226, 200801, 210105, 230513, 230814, 241529, 241801, 244106, 244128, 244202, 244614, 245018                                                                                                                                                                                                         |
|                                       | 2nd year         | 24/1206 ( 2.0%) | 120306, 120308, 120334, 120402, 120404, 120405, 120408, 120607, 120616, 120627, 160123, 161502, 180138, 200603, 240741, 241139, 241714, 241801, 243504, 243957, 244714, 244902, 245517, 246207                                                                                                                                                                                                                                                                                 |
|                                       | 3rd year         | 15/1012 ( 1.5%) | 120226, 120325, 120404, 120405, 120614, 120631, 160916, 160942, 180113, 180117, 180138, 210413, 240502, 241508, 244123                                                                                                                                                                                                                                                                                                                                                         |
|                                       | Overall          | 58/1452 ( 4.0%) | 120102, 120226, 120302, 120306, 120308, 120317, 120325, 120334, 120336, 120402, 120404, 120405, 120408, 120607, 120614, 120616, 120618, 120627, 120631, 140610, 140720, 141002, 160123, 160916, 160942, 161502, 180113, 180117, 180133, 180138, 180663, 200206, 200226, 200603, 200801, 210105, 210413, 230513, 230814, 240502, 240741, 241139, 241508, 241529, 241714, 241801, 243504, 243957, 244106, 244123, 244128, 244202, 244614, 244714, 244902, 245018, 245517, 246207 |
| Vaginal disorder                      | 1st year         | 2/1452 ( 0.1%)  | 140810, 231010                                                                                                                                                                                                                                                                                                                                                                                                                                                                 |
|                                       | 3rd year         | 2/1012 ( 0.2%)  | 150141, 230601                                                                                                                                                                                                                                                                                                                                                                                                                                                                 |
|                                       | Overall          | 4/1452 ( 0.3%)  | 140810, 150141, 230601, 231010                                                                                                                                                                                                                                                                                                                                                                                                                                                 |

Table 14.3.1 / 10: Number of subjects with adverse events including subject identifier and year by treatment (FAS)  
 (cont.)

TREATMENT: LCS16

Primary system organ class

| Preferred term<br>MedDRA version 14.0 | YEAR OF<br>ONSET | N (%)           | subject identifier                                                                                                                                                                                                                                                                                                                                                                                                                                                                                                                                                                                     |
|---------------------------------------|------------------|-----------------|--------------------------------------------------------------------------------------------------------------------------------------------------------------------------------------------------------------------------------------------------------------------------------------------------------------------------------------------------------------------------------------------------------------------------------------------------------------------------------------------------------------------------------------------------------------------------------------------------------|
| Vaginal haemorrhage                   | 1st year         | 53/1452 ( 3.7%) | 120308, 141407, 150162, 160303, 160307, 160502, 160503, 160634, 160641, 160703, 160718, 160723, 160727, 161505, 180105, 180202, 180309, 180314, 180326, 180807, 190206, 200507, 200806, 200926, 210105, 210110, 210115, 210117, 210133, 230110, 230612, 230909, 231013, 240211, 240324, 241107, 241171, 241218, 241501, 241603, 242306, 242312, 242508, 243228, 243601, 243719, 243905, 243959, 243975, 245002, 245031, 245429, 245925                                                                                                                                                                 |
|                                       | 2nd year         | 15/1206 ( 1.2%) | 150154, 160512, 160621, 160636, 160702, 160748, 200515, 200609, 230111, 241714, 241901, 242003, 243215, 244120, 245407                                                                                                                                                                                                                                                                                                                                                                                                                                                                                 |
|                                       | 3rd year         | 5/1012 ( 0.5%)  | 160529, 170301, 170303, 230416, 240626                                                                                                                                                                                                                                                                                                                                                                                                                                                                                                                                                                 |
|                                       | Overall          | 73/1452 ( 5.0%) | 120308, 141407, 150154, 150162, 160303, 160307, 160502, 160503, 160512, 160529, 160621, 160634, 160636, 160641, 160702, 160703, 160718, 160723, 160727, 160748, 161505, 170301, 170303, 180105, 180202, 180309, 180314, 180326, 180807, 190206, 200507, 200515, 200609, 200806, 200926, 210105, 210110, 210115, 210117, 210133, 230110, 230111, 230416, 230612, 230909, 231013, 240211, 240324, 240626, 241107, 241171, 241218, 241501, 241603, 241714, 241901, 242003, 242306, 242312, 242508, 243215, 243228, 243601, 243719, 243905, 243959, 243975, 244120, 245002, 245031, 245407, 245429, 245925 |
|                                       |                  |                 |                                                                                                                                                                                                                                                                                                                                                                                                                                                                                                                                                                                                        |
| Vaginal odour                         | 1st year         | 5/1452 ( 0.3%)  | 160941, 241139, 241501, 243902, 244120                                                                                                                                                                                                                                                                                                                                                                                                                                                                                                                                                                 |
|                                       | 2nd year         | 3/1206 ( 0.2%)  | 241139, 244120, 244133                                                                                                                                                                                                                                                                                                                                                                                                                                                                                                                                                                                 |
|                                       | 3rd year         | 1/1012 ( <0.1%) | 241420                                                                                                                                                                                                                                                                                                                                                                                                                                                                                                                                                                                                 |
|                                       | Overall          | 7/1452 ( 0.5%)  | 160941, 241139, 241420, 241501, 243902, 244120, 244133                                                                                                                                                                                                                                                                                                                                                                                                                                                                                                                                                 |
| Vaginal perforation                   | 2nd year         | 1/1206 ( <0.1%) | 180521                                                                                                                                                                                                                                                                                                                                                                                                                                                                                                                                                                                                 |
|                                       | Overall          | 1/1452 ( <0.1%) | 180521                                                                                                                                                                                                                                                                                                                                                                                                                                                                                                                                                                                                 |

Table 14.3.1 / 10: Number of subjects with adverse events including subject identifier and year by treatment (FAS)  
 (cont.)

TREATMENT: LCS16

| Primary system organ class<br>Preferred term<br>MedDRA version 14.0 | YEAR OF<br>ONSET | N (%)           | subject identifier                                                                                                                     |
|---------------------------------------------------------------------|------------------|-----------------|----------------------------------------------------------------------------------------------------------------------------------------|
| Vaginal ulceration                                                  | 2nd year         | 1/1206 ( <0.1%) | 243303                                                                                                                                 |
|                                                                     | Overall          | 1/1452 ( <0.1%) | 243303                                                                                                                                 |
| Vulvovaginal burning sensation                                      | 1st year         | 1/1452 ( <0.1%) | 160948                                                                                                                                 |
|                                                                     | 2nd year         | 1/1206 ( <0.1%) | 244406                                                                                                                                 |
|                                                                     | 3rd year         | 2/1012 ( 0.2%)  | 140804, 244113                                                                                                                         |
|                                                                     | Overall          | 4/1452 ( 0.3%)  | 140804, 160948, 244113, 244406                                                                                                         |
| Vulvovaginal discomfort                                             | 1st year         | 1/1452 ( <0.1%) | 241237                                                                                                                                 |
|                                                                     | 2nd year         | 1/1206 ( <0.1%) | 244128                                                                                                                                 |
|                                                                     | Overall          | 2/1452 ( 0.1%)  | 241237, 244128                                                                                                                         |
| Vulvovaginal dryness                                                | 1st year         | 5/1452 ( 0.3%)  | 140801, 161509, 241546, 244106, 245409                                                                                                 |
|                                                                     | Overall          | 5/1452 ( 0.3%)  | 140801, 161509, 241546, 244106, 245409                                                                                                 |
| Vulvovaginal erythema                                               | 1st year         | 1/1452 ( <0.1%) | 141002                                                                                                                                 |
|                                                                     | 2nd year         | 1/1206 ( <0.1%) | 245020                                                                                                                                 |
|                                                                     | Overall          | 2/1452 ( 0.1%)  | 141002, 245020                                                                                                                         |
| Vulvovaginal pain                                                   | 1st year         | 2/1452 ( 0.1%)  | 120306, 200214                                                                                                                         |
|                                                                     | Overall          | 2/1452 ( 0.1%)  | 120306, 200214                                                                                                                         |
| Vulvovaginal pruritus                                               | 1st year         | 11/1452 ( 0.8%) | 120615, 140810, 141414, 150150, 161415, 190114, 190207, 210105, 230823, 240128, 244709                                                 |
|                                                                     | 2nd year         | 4/1206 ( 0.3%)  | 120233, 141005, 150103, 190114                                                                                                         |
|                                                                     | 3rd year         | 4/1012 ( 0.4%)  | 161417, 190207, 200712, 241176                                                                                                         |
|                                                                     | Overall          | 17/1452 ( 1.2%) | 120233, 120615, 140810, 141005, 141414, 150103, 150150, 161415, 161417, 190114, 190207, 200712, 210105, 230823, 240128, 241176, 244709 |
| Vulvovaginal swelling                                               | 2nd year         | 1/1206 ( <0.1%) | 190207                                                                                                                                 |
|                                                                     | Overall          | 1/1452 ( <0.1%) | 190207                                                                                                                                 |
| Respiratory, thoracic and mediastinal disorders                     | 1st year         | 40/1452 ( 2.8%) |                                                                                                                                        |
|                                                                     | 2nd year         | 20/1206 ( 1.7%) |                                                                                                                                        |
|                                                                     | 3rd year         | 18/1012 ( 1.8%) |                                                                                                                                        |
|                                                                     | Overall          | 70/1452 ( 4.8%) |                                                                                                                                        |

Table 14.3.1 / 10: Number of subjects with adverse events including subject identifier and year by treatment (FAS)  
(cont.)

TREATMENT: LCS16

| Primary system organ class<br>Preferred term<br>MedDRA version 14.0 | YEAR OF<br>ONSET | N (%)           | subject identifier                                                                                     |
|---------------------------------------------------------------------|------------------|-----------------|--------------------------------------------------------------------------------------------------------|
| Allergic sinusitis                                                  | 1st year         | 1/1452 ( <0.1%) | 241522                                                                                                 |
|                                                                     | Overall          | 1/1452 ( <0.1%) | 241522                                                                                                 |
| Asthma                                                              | 1st year         | 4/1452 ( 0.3%)  | 160629, 160808, 160950, 241418                                                                         |
|                                                                     | 2nd year         | 4/1206 ( 0.3%)  | 160950, 161009, 161118, 244801                                                                         |
|                                                                     | 3rd year         | 4/1012 ( 0.4%)  | 160324, 160919, 241412, 244802                                                                         |
|                                                                     | Overall          | 11/1452 ( 0.8%) | 160324, 160629, 160808, 160919, 160950, 161009, 161118, 241412, 241418, 244801, 244802                 |
| Atelectasis                                                         | 3rd year         | 1/1012 ( <0.1%) | 242321                                                                                                 |
|                                                                     | Overall          | 1/1452 ( <0.1%) | 242321                                                                                                 |
| Bronchospasm                                                        | 2nd year         | 1/1206 ( <0.1%) | 120609                                                                                                 |
|                                                                     | 3rd year         | 1/1012 ( <0.1%) | 120617                                                                                                 |
|                                                                     | Overall          | 2/1452 ( 0.1%)  | 120609, 120617                                                                                         |
| Cough                                                               | 1st year         | 11/1452 ( 0.8%) | 160307, 160426, 160629, 161302, 190202, 210405, 210413, 230820, 230905, 242317, 244446                 |
|                                                                     | 2nd year         | 3/1206 ( 0.2%)  | 230905, 241420, 242908                                                                                 |
|                                                                     | 3rd year         | 1/1012 ( <0.1%) | 161302                                                                                                 |
|                                                                     | Overall          | 13/1452 ( 0.9%) | 160307, 160426, 160629, 161302, 190202, 210405, 210413, 230820, 230905, 241420, 242317, 242908, 244446 |
| Diaphragmatic hernia                                                | 1st year         | 1/1452 ( <0.1%) | 161008                                                                                                 |
|                                                                     | Overall          | 1/1452 ( <0.1%) | 161008                                                                                                 |
| Dyspnoea                                                            | 3rd year         | 2/1012 ( 0.2%)  | 160602, 241412                                                                                         |
|                                                                     | Overall          | 2/1452 ( 0.1%)  | 160602, 241412                                                                                         |
| Epistaxis                                                           | 3rd year         | 1/1012 ( <0.1%) | 243016                                                                                                 |
|                                                                     | Overall          | 1/1452 ( <0.1%) | 243016                                                                                                 |
| Hyperventilation                                                    | 1st year         | 1/1452 ( <0.1%) | 200922                                                                                                 |
|                                                                     | Overall          | 1/1452 ( <0.1%) | 200922                                                                                                 |
| Hypoxia                                                             | 3rd year         | 1/1012 ( <0.1%) | 241412                                                                                                 |
|                                                                     | Overall          | 1/1452 ( <0.1%) | 241412                                                                                                 |



Table 14.3.1 / 10: Number of subjects with adverse events including subject identifier and year by treatment (FAS)  
 (cont.)

TREATMENT: LCS16

| Primary system organ class<br>Preferred term<br>MedDRA version 14.0 | YEAR OF<br>ONSET | N (%)           | subject identifier                                                                                                                           |
|---------------------------------------------------------------------|------------------|-----------------|----------------------------------------------------------------------------------------------------------------------------------------------|
| Nasal congestion                                                    | 1st year         | 1/1452 ( <0.1%) | 230305                                                                                                                                       |
|                                                                     | Overall          | 1/1452 ( <0.1%) | 230305                                                                                                                                       |
| Nasal polyps                                                        | 2nd year         | 1/1206 ( <0.1%) | 160735                                                                                                                                       |
|                                                                     | Overall          | 1/1452 ( <0.1%) | 160735                                                                                                                                       |
| Oropharyngeal pain                                                  | 1st year         | 10/1452 ( 0.7%) | 120612, 120618, 140607, 160636, 170408, 170703,<br>230207, 240706, 241802, 242912                                                            |
|                                                                     | 2nd year         | 7/1206 ( 0.6%)  | 120424, 120609, 120612, 120631, 170703, 242908,<br>244517                                                                                    |
|                                                                     | 3rd year         | 2/1012 ( 0.2%)  | 231113, 241308                                                                                                                               |
|                                                                     | Overall          | 17/1452 ( 1.2%) | 120424, 120609, 120612, 120618, 120631, 140607,<br>160636, 170408, 170703, 230207, 231113, 240706,<br>241308, 241802, 242908, 242912, 244517 |
| Pleural effusion                                                    | 3rd year         | 1/1012 ( <0.1%) | 242321                                                                                                                                       |
|                                                                     | Overall          | 1/1452 ( <0.1%) | 242321                                                                                                                                       |
| Pleurisy                                                            | 1st year         | 1/1452 ( <0.1%) | 241709                                                                                                                                       |
|                                                                     | Overall          | 1/1452 ( <0.1%) | 241709                                                                                                                                       |
| Pneumonitis                                                         | 1st year         | 1/1452 ( <0.1%) | 120622                                                                                                                                       |
|                                                                     | Overall          | 1/1452 ( <0.1%) | 120622                                                                                                                                       |
| Rhinitis allergic                                                   | 1st year         | 7/1452 ( 0.5%)  | 150120, 150126, 150139, 160561, 161131, 230614,<br>241415                                                                                    |
|                                                                     | 2nd year         | 2/1206 ( 0.2%)  | 160723, 161223                                                                                                                               |
|                                                                     | 3rd year         | 4/1012 ( 0.4%)  | 150141, 160540, 160561, 230614                                                                                                               |
|                                                                     | Overall          | 11/1452 ( 0.8%) | 150120, 150126, 150139, 150141, 160540, 160561,<br>160723, 161131, 161223, 230614, 241415                                                    |
| Rhinitis seasonal                                                   | 1st year         | 2/1452 ( 0.1%)  | 243901, 243936                                                                                                                               |
|                                                                     | Overall          | 2/1452 ( 0.1%)  | 243901, 243936                                                                                                                               |
| Sinus congestion                                                    | 2nd year         | 2/1206 ( 0.2%)  | 242803, 242817                                                                                                                               |
|                                                                     | Overall          | 2/1452 ( 0.1%)  | 242803, 242817                                                                                                                               |

Table 14.3.1 / 10: Number of subjects with adverse events including subject identifier and year by treatment (FAS)  
(cont.)

TREATMENT: LCS16

| Primary system organ class<br>Preferred term<br>MedDRA version 14.0 | YEAR OF<br>ONSET | N (%)             | subject identifier |
|---------------------------------------------------------------------|------------------|-------------------|--------------------|
| Sinus polyp                                                         | 2nd year         | 1/1206 ( <0.1%)   | 244429             |
|                                                                     | Overall          | 1/1452 ( <0.1%)   | 244429             |
| Sleep apnoea syndrome                                               | 3rd year         | 1/1012 ( <0.1%)   | 245806             |
|                                                                     | Overall          | 1/1452 ( <0.1%)   | 245806             |
| Tonsillar disorder                                                  | 3rd year         | 1/1012 ( <0.1%)   | 140804             |
|                                                                     | Overall          | 1/1452 ( <0.1%)   | 140804             |
| Upper respiratory tract inflammation                                | 1st year         | 1/1452 ( <0.1%)   | 160934             |
|                                                                     | 2nd year         | 1/1206 ( <0.1%)   | 160986             |
|                                                                     | 3rd year         | 1/1012 ( <0.1%)   | 160986             |
|                                                                     | Overall          | 2/1452 ( 0.1%)    | 160934, 160986     |
| Skin and subcutaneous tissue disorders                              | 1st year         | 183/1452 ( 12.6%) |                    |
|                                                                     | 2nd year         | 65/1206 ( 5.4%)   |                    |
|                                                                     | 3rd year         | 28/1012 ( 2.8%)   |                    |
|                                                                     | Overall          | 254/1452 ( 17.5%) |                    |

Table 14.3.1 / 10: Number of subjects with adverse events including subject identifier and year by treatment (FAS)  
 (cont.)

TREATMENT: LCS16

Primary system organ class

Preferred term

MedDRA version 14.0

|      | YEAR OF ONSET | N (%)             | subject identifier                                                                                                                                                                                                                                                                                                                                                                                                                                                                                                                                                                                                                                                                                                                                                                                                                                                                                                                                                                                                                                             |
|------|---------------|-------------------|----------------------------------------------------------------------------------------------------------------------------------------------------------------------------------------------------------------------------------------------------------------------------------------------------------------------------------------------------------------------------------------------------------------------------------------------------------------------------------------------------------------------------------------------------------------------------------------------------------------------------------------------------------------------------------------------------------------------------------------------------------------------------------------------------------------------------------------------------------------------------------------------------------------------------------------------------------------------------------------------------------------------------------------------------------------|
| Acne | 1st year      | 128/1452 ( 8.8%)  | 120609, 140103, 140106, 140112, 140504, 140508, 140523, 140803, 141002, 141025, 141105, 141108, 141415, 150117, 150120, 150146, 150159, 160124, 160126, 160202, 160211, 160314, 160326, 160330, 160417, 160534, 160543, 160602, 160621, 160622, 160634, 160636, 160642, 160728, 160735, 160750, 160752, 160759, 160761, 160920, 160929, 160932, 160936, 160947, 160958, 160968, 160969, 160978, 160986, 161103, 161201, 161302, 161307, 161315, 161405, 161509, 161538, 170601, 170602, 170703, 180601, 180602, 180625, 180632, 180641, 180659, 180738, 190620, 190640, 200229, 200411, 200520, 200605, 200632, 200711, 210122, 210133, 210206, 230110, 230215, 230306, 230315, 230409, 230503, 230505, 230612, 230707, 230814, 230823, 230918, 231104, 240103, 240332, 240511, 240706, 240823, 241030, 241111, 241116, 241155, 241176, 241195, 241529, 241556, 242216, 242702, 243020, 243123, 243208, 243228, 243959, 244114, 244312, 244424, 244446, 244519, 244611, 244916, 244922, 244935, 244936, 245505, 245513, 245925, 245927, 245930, 246201, 246218 |
|      | 2nd year      | 33/1206 ( 2.7%)   | 120404, 140514, 140702, 160114, 160403, 160413, 160531, 160907, 160970, 180608, 180622, 180628, 190641, 200632, 230305, 240741, 240810, 241310, 241403, 242104, 242904, 242912, 242918, 243023, 243402, 243928, 243936, 243957, 244606, 244714, 245522, 245909, 246201                                                                                                                                                                                                                                                                                                                                                                                                                                                                                                                                                                                                                                                                                                                                                                                         |
|      | 3rd year      | 13/1012 ( 1.3%)   | 120616, 160114, 160115, 161009, 161524, 200509, 240369, 240840, 241308, 241709, 242503, 243928, 245930                                                                                                                                                                                                                                                                                                                                                                                                                                                                                                                                                                                                                                                                                                                                                                                                                                                                                                                                                         |
|      | Overall       | 169/1452 ( 11.6%) | 120404, 120609, 120616, 140103, 140106, 140112, 140504, 140508, 140514, 140523, 140702, 140803, 141002, 141025, 141105, 141108, 141415, 150117, 150120, 150146, 150159, 160114, 160115, 160124, 160126,                                                                                                                                                                                                                                                                                                                                                                                                                                                                                                                                                                                                                                                                                                                                                                                                                                                        |

Table 14.3.1 / 10: Number of subjects with adverse events including subject identifier and year by treatment (FAS)  
 (cont.)

TREATMENT: LCS16

Primary system organ class

Preferred term

MedDRA version 14.0

YEAR OF

ONSET

N (%)

subject identifier

160202, 160211, 160314, 160326, 160330, 160403,  
 160413, 160417, 160531, 160534, 160543, 160602,  
 160621, 160622, 160634, 160636, 160642, 160728,  
 160735, 160750, 160752, 160759, 160761, 160907,  
 160920,  
 160929, 160932, 160936, 160947, 160958, 160968,  
 160969, 160970, 160978, 160986, 161009, 161103,  
 161201, 161302, 161307, 161315, 161405, 161509,  
 161524, 161538, 170601, 170602, 170703, 180601,  
 180602,  
 180608, 180622, 180625, 180628, 180632, 180641,  
 180659, 180738, 190620, 190640, 190641, 200229,  
 200411, 200509, 200520, 200605, 200632, 200711,  
 210122, 210133, 210206, 230110, 230215, 230305,  
 230306,  
 230315, 230409, 230503, 230505, 230612, 230707,  
 230814, 230823, 230918, 231104, 240103, 240332,  
 240369, 240511, 240706, 240741, 240810, 240823,  
 240840, 241030, 241111, 241116, 241155, 241176,  
 241195,  
 241308, 241310, 241403, 241529, 241556, 241709,  
 242104, 242216, 242503, 242702, 242904, 242912,  
 242918, 243020, 243023, 243123, 243208, 243228,  
 243402, 243928, 243936, 243957, 243959, 244114,  
 244312,  
 244424, 244446, 244519, 244606, 244611, 244714,  
 244916, 244922, 244935, 244936, 245505, 245513,  
 245522, 245909, 245925, 245927, 245930, 246201,  
 246218

Alopecia

1st year

10/1452 ( 0.7%)

 160630, 180138, 180660, 200628, 200925, 230814,  
 241030, 241171, 241555, 244418

2nd year

1/1206 (&lt;0.1%)

180103

3rd year

2/1012 ( 0.2%)

180683, 230207

Overall

13/1452 ( 0.9%)

 160630, 180103, 180138, 180660, 180683, 200628,  
 200925, 230207, 230814, 241030, 241171, 241555,  
 244418

Dandruff

1st year

1/1452 (&lt;0.1%)

160642

Overall

1/1452 (&lt;0.1%)

160642

Table 14.3.1 / 10: Number of subjects with adverse events including subject identifier and year by treatment (FAS)  
(cont.)

TREATMENT: LCS16

| Primary system organ class<br>Preferred term<br>MedDRA version 14.0 | YEAR OF<br>ONSET | N (%)           | subject identifier                                                                |
|---------------------------------------------------------------------|------------------|-----------------|-----------------------------------------------------------------------------------|
| Dermatitis                                                          | 1st year         | 5/1452 ( 0.3%)  | 120420, 160628, 161004, 190114, 230506                                            |
|                                                                     | 2nd year         | 2/1206 ( 0.2%)  | 161429, 243318                                                                    |
|                                                                     | Overall          | 7/1452 ( 0.5%)  | 120420, 160628, 161004, 161429, 190114, 230506,<br>243318                         |
| Dermatitis allergic                                                 | 1st year         | 1/1452 (<0.1%)  | 241155                                                                            |
|                                                                     | 2nd year         | 2/1206 ( 0.2%)  | 160629, 161008                                                                    |
|                                                                     | 3rd year         | 2/1012 ( 0.2%)  | 161118, 230822                                                                    |
|                                                                     | Overall          | 5/1452 ( 0.3%)  | 160629, 161008, 161118, 230822, 241155                                            |
| Dermatitis atopic                                                   | 1st year         | 3/1452 ( 0.2%)  | 150139, 150150, 242321                                                            |
|                                                                     | 2nd year         | 1/1206 (<0.1%)  | 242321                                                                            |
|                                                                     | 3rd year         | 2/1012 ( 0.2%)  | 160752, 244202                                                                    |
|                                                                     | Overall          | 5/1452 ( 0.3%)  | 150139, 150150, 160752, 242321, 244202                                            |
| Dermatitis contact                                                  | 1st year         | 3/1452 ( 0.2%)  | 141411, 244517, 245913                                                            |
|                                                                     | 3rd year         | 2/1012 ( 0.2%)  | 243008, 245801                                                                    |
|                                                                     | Overall          | 5/1452 ( 0.3%)  | 141411, 243008, 244517, 245801, 245913                                            |
| Dry skin                                                            | 2nd year         | 1/1206 (<0.1%)  | 245927                                                                            |
|                                                                     | Overall          | 1/1452 (<0.1%)  | 245927                                                                            |
| Eczema                                                              | 1st year         | 4/1452 ( 0.3%)  | 140810, 160523, 161529, 210134                                                    |
|                                                                     | 2nd year         | 3/1206 ( 0.2%)  | 160115, 210134, 241420                                                            |
|                                                                     | 3rd year         | 2/1012 ( 0.2%)  | 160907, 230503                                                                    |
|                                                                     | Overall          | 8/1452 ( 0.6%)  | 140810, 160115, 160523, 160907, 161529, 210134,<br>230503, 241420                 |
| Hirsutism                                                           | 1st year         | 5/1452 ( 0.3%)  | 140120, 141410, 160206, 200509, 210131                                            |
|                                                                     | 2nd year         | 6/1206 ( 0.5%)  | 141401, 141411, 141415, 210131, 230402, 244606                                    |
|                                                                     | Overall          | 10/1452 ( 0.7%) | 140120, 141401, 141410, 141411, 141415, 160206,<br>200509, 210131, 230402, 244606 |
| Hyperhidrosis                                                       | 1st year         | 2/1452 ( 0.1%)  | 245507, 245511                                                                    |
|                                                                     | Overall          | 2/1452 ( 0.1%)  | 245507, 245511                                                                    |
| Hypertrichosis                                                      | 2nd year         | 1/1206 (<0.1%)  | 245909                                                                            |
|                                                                     | Overall          | 1/1452 (<0.1%)  | 245909                                                                            |

Table 14.3.1 / 10: Number of subjects with adverse events including subject identifier and year by treatment (FAS)  
 (cont.)

TREATMENT: LCS16

| Primary system organ class<br>Preferred term<br>MedDRA version 14.0 | YEAR OF<br>ONSET | N (%)          | subject identifier                                                |
|---------------------------------------------------------------------|------------------|----------------|-------------------------------------------------------------------|
| Lichen sclerosus                                                    | 1st year         | 2/1452 ( 0.1%) | 160932, 161311                                                    |
|                                                                     | Overall          | 2/1452 ( 0.1%) | 160932, 161311                                                    |
| Neurodermatitis                                                     | 1st year         | 1/1452 (<0.1%) | 241522                                                            |
|                                                                     | Overall          | 1/1452 (<0.1%) | 241522                                                            |
| Night sweats                                                        | 2nd year         | 1/1206 (<0.1%) | 242811                                                            |
|                                                                     | Overall          | 1/1452 (<0.1%) | 242811                                                            |
| Photosensitivity reaction                                           | 2nd year         | 1/1206 (<0.1%) | 160950                                                            |
|                                                                     | 3rd year         | 1/1012 (<0.1%) | 160950                                                            |
|                                                                     | Overall          | 1/1452 (<0.1%) | 160950                                                            |
| Pityriasis rosea                                                    | 1st year         | 1/1452 (<0.1%) | 161113                                                            |
|                                                                     | 2nd year         | 1/1206 (<0.1%) | 141025                                                            |
|                                                                     | Overall          | 2/1452 ( 0.1%) | 141025, 161113                                                    |
| Precancerous skin lesion                                            | 2nd year         | 1/1206 (<0.1%) | 243301                                                            |
|                                                                     | Overall          | 1/1452 (<0.1%) | 243301                                                            |
| Pruritus                                                            | 1st year         | 1/1452 (<0.1%) | 140504                                                            |
|                                                                     | 2nd year         | 2/1206 ( 0.2%) | 160529, 242704                                                    |
|                                                                     | Overall          | 3/1452 ( 0.2%) | 140504, 160529, 242704                                            |
| Pruritus allergic                                                   | 1st year         | 1/1452 (<0.1%) | 150164                                                            |
|                                                                     | 2nd year         | 1/1206 (<0.1%) | 150117                                                            |
|                                                                     | Overall          | 2/1452 ( 0.1%) | 150117, 150164                                                    |
| Psoriasis                                                           | 1st year         | 1/1452 (<0.1%) | 120622                                                            |
|                                                                     | 2nd year         | 1/1206 (<0.1%) | 200618                                                            |
|                                                                     | Overall          | 2/1452 ( 0.1%) | 120622, 200618                                                    |
| Rash                                                                | 1st year         | 7/1452 ( 0.5%) | 140101, 140818, 160513, 230416, 242202, 243509,<br>243703         |
|                                                                     | 3rd year         | 1/1012 (<0.1%) | 243833                                                            |
|                                                                     | Overall          | 8/1452 ( 0.6%) | 140101, 140818, 160513, 230416, 242202, 243509,<br>243703, 243833 |

Table 14.3.1 / 10: Number of subjects with adverse events including subject identifier and year by treatment (FAS)  
 (cont.)

TREATMENT: LCS16

| Primary system organ class<br>Preferred term<br>MedDRA version 14.0 | YEAR OF<br>ONSET | N (%)           | subject identifier                                                                |
|---------------------------------------------------------------------|------------------|-----------------|-----------------------------------------------------------------------------------|
| Rash macular                                                        | 3rd year         | 1/1012 ( <0.1%) | 243833                                                                            |
|                                                                     | Overall          | 1/1452 ( <0.1%) | 243833                                                                            |
| Rash papular                                                        | 2nd year         | 1/1206 ( <0.1%) | 243976                                                                            |
|                                                                     | Overall          | 1/1452 ( <0.1%) | 243976                                                                            |
| Rosacea                                                             | 1st year         | 2/1452 ( 0.1%)  | 140803, 242317                                                                    |
|                                                                     | Overall          | 2/1452 ( 0.1%)  | 140803, 242317                                                                    |
| Scar                                                                | 2nd year         | 1/1206 ( <0.1%) | 210605                                                                            |
|                                                                     | Overall          | 1/1452 ( <0.1%) | 210605                                                                            |
| Seborrhoea                                                          | 1st year         | 8/1452 ( 0.6%)  | 150146, 160115, 160517, 160627, 161108, 161116,<br>246115, 246139                 |
|                                                                     | 2nd year         | 4/1206 ( 0.3%)  | 120306, 120318, 160517, 161116                                                    |
|                                                                     | Overall          | 10/1452 ( 0.7%) | 120306, 120318, 150146, 160115, 160517, 160627,<br>161108, 161116, 246115, 246139 |
| Skin fissures                                                       | 1st year         | 1/1452 ( <0.1%) | 160761                                                                            |
|                                                                     | 2nd year         | 1/1206 ( <0.1%) | 141025                                                                            |
|                                                                     | Overall          | 2/1452 ( 0.1%)  | 141025, 160761                                                                    |
| Skin hypopigmentation                                               | 3rd year         | 1/1012 ( <0.1%) | 243833                                                                            |
|                                                                     | Overall          | 1/1452 ( <0.1%) | 243833                                                                            |
| Skin irritation                                                     | 1st year         | 2/1452 ( 0.1%)  | 200902, 242508                                                                    |
|                                                                     | Overall          | 2/1452 ( 0.1%)  | 200902, 242508                                                                    |
| Skin lesion                                                         | 3rd year         | 1/1012 ( <0.1%) | 244902                                                                            |
|                                                                     | Overall          | 1/1452 ( <0.1%) | 244902                                                                            |
| Skin odour abnormal                                                 | 2nd year         | 1/1206 ( <0.1%) | 161211                                                                            |
|                                                                     | Overall          | 1/1452 ( <0.1%) | 161211                                                                            |

Table 14.3.1 / 10: Number of subjects with adverse events including subject identifier and year by treatment (FAS)  
(cont.)

TREATMENT: LCS16

| Primary system organ class<br>Preferred term<br>MedDRA version 14.0 | YEAR OF<br>ONSET | N (%)           | subject identifier                                                             |
|---------------------------------------------------------------------|------------------|-----------------|--------------------------------------------------------------------------------|
| Urticaria                                                           | 1st year         | 5/1452 ( 0.3%)  | 160330, 160972, 170701, 210110, 244519                                         |
|                                                                     | 2nd year         | 2/1206 ( 0.2%)  | 200930, 243305                                                                 |
|                                                                     | 3rd year         | 3/1012 ( 0.3%)  | 140512, 200509, 243960                                                         |
|                                                                     | Overall          | 10/1452 ( 0.7%) | 140512, 160330, 160972, 170701, 200509, 200930, 210110, 243305, 243960, 244519 |
| Vitiligo                                                            | 3rd year         | 1/1012 ( <0.1%) | 243833                                                                         |
|                                                                     | Overall          | 1/1452 ( <0.1%) | 243833                                                                         |
| Social circumstances                                                | 1st year         | 1/1452 ( <0.1%) |                                                                                |
|                                                                     | Overall          | 1/1452 ( <0.1%) |                                                                                |
| Hearing disability                                                  | 1st year         | 1/1452 ( <0.1%) | 160561                                                                         |
|                                                                     | Overall          | 1/1452 ( <0.1%) | 160561                                                                         |
| Surgical and medical procedures                                     | 1st year         | 22/1452 ( 1.5%) |                                                                                |
|                                                                     | 2nd year         | 18/1206 ( 1.5%) |                                                                                |
|                                                                     | 3rd year         | 8/1012 ( 0.8%)  |                                                                                |
|                                                                     | Overall          | 45/1452 ( 3.1%) |                                                                                |
| Abdominoplasty                                                      | 1st year         | 1/1452 ( <0.1%) | 244410                                                                         |
|                                                                     | Overall          | 1/1452 ( <0.1%) | 244410                                                                         |
| Anal sphincterotomy                                                 | 2nd year         | 1/1206 ( <0.1%) | 241420                                                                         |
|                                                                     | Overall          | 1/1452 ( <0.1%) | 241420                                                                         |
| Apicectomy                                                          | 1st year         | 1/1452 ( <0.1%) | 200513                                                                         |
|                                                                     | 2nd year         | 1/1206 ( <0.1%) | 200513                                                                         |
|                                                                     | Overall          | 1/1452 ( <0.1%) | 200513                                                                         |
| Breast prosthesis implantation                                      | 3rd year         | 1/1012 ( <0.1%) | 120426                                                                         |
|                                                                     | Overall          | 1/1452 ( <0.1%) | 120426                                                                         |
| Bunion operation                                                    | 3rd year         | 1/1012 ( <0.1%) | 200510                                                                         |
|                                                                     | Overall          | 1/1452 ( <0.1%) | 200510                                                                         |
| Cervix cautery                                                      | 1st year         | 1/1452 ( <0.1%) | 190123                                                                         |
|                                                                     | Overall          | 1/1452 ( <0.1%) | 190123                                                                         |



Table 14.3.1 / 10: Number of subjects with adverse events including subject identifier and year by treatment (FAS)  
 (cont.)

TREATMENT: LCS16

| Primary system organ class<br>Preferred term<br>MedDRA version 14.0 | YEAR OF<br>ONSET | N (%)           | subject identifier     |
|---------------------------------------------------------------------|------------------|-----------------|------------------------|
| Dental operation                                                    | 1st year         | 3/1452 ( 0.2%)  | 120309, 160115, 160123 |
|                                                                     | Overall          | 3/1452 ( 0.2%)  | 120309, 160115, 160123 |
| Detoxification                                                      | 2nd year         | 1/1206 ( <0.1%) | 244424                 |
|                                                                     | Overall          | 1/1452 ( <0.1%) | 244424                 |
| Endodontic procedure                                                | 1st year         | 1/1452 ( <0.1%) | 150131                 |
|                                                                     | 2nd year         | 1/1206 ( <0.1%) | 160107                 |
|                                                                     | Overall          | 2/1452 ( 0.1%)  | 150131, 160107         |
| Eye laser surgery                                                   | 2nd year         | 1/1206 ( <0.1%) | 160919                 |
|                                                                     | Overall          | 1/1452 ( <0.1%) | 160919                 |
| Gallbladder operation                                               | 1st year         | 1/1452 ( <0.1%) | 230612                 |
|                                                                     | Overall          | 1/1452 ( <0.1%) | 230612                 |
| Gastric bypass                                                      | 2nd year         | 1/1206 ( <0.1%) | 160942                 |
|                                                                     | Overall          | 1/1452 ( <0.1%) | 160942                 |
| Haemorrhoid operation                                               | 2nd year         | 1/1206 ( <0.1%) | 160561                 |
|                                                                     | Overall          | 1/1452 ( <0.1%) | 160561                 |
| Keratomileusis                                                      | 3rd year         | 1/1012 ( <0.1%) | 242317                 |
|                                                                     | Overall          | 1/1452 ( <0.1%) | 242317                 |
| Mammoplasty                                                         | 3rd year         | 3/1012 ( 0.3%)  | 160702, 160969, 200902 |
|                                                                     | Overall          | 3/1452 ( 0.2%)  | 160702, 160969, 200902 |
| Meniscus operation                                                  | 2nd year         | 1/1206 ( <0.1%) | 140119                 |
|                                                                     | Overall          | 1/1452 ( <0.1%) | 140119                 |
| Mole excision                                                       | 1st year         | 1/1452 ( <0.1%) | 160123                 |
|                                                                     | 2nd year         | 1/1206 ( <0.1%) | 243229                 |
|                                                                     | Overall          | 2/1452 ( 0.1%)  | 160123, 243229         |
| Nasal polypectomy                                                   | 1st year         | 1/1452 ( <0.1%) | 160735                 |
|                                                                     | Overall          | 1/1452 ( <0.1%) | 160735                 |

Table 14.3.1 / 10: Number of subjects with adverse events including subject identifier and year by treatment (FAS)  
 (cont.)

TREATMENT: LCS16

| Primary system organ class<br>Preferred term<br>MedDRA version 14.0 | YEAR OF<br>ONSET | N (%)           | subject identifier                                                     |
|---------------------------------------------------------------------|------------------|-----------------|------------------------------------------------------------------------|
| Parasitic infection prophylaxis                                     | 1st year         | 1/1452 ( <0.1%) | 160950                                                                 |
|                                                                     | Overall          | 1/1452 ( <0.1%) | 160950                                                                 |
| Plastic surgery                                                     | 1st year         | 1/1452 ( <0.1%) | 230915                                                                 |
|                                                                     | Overall          | 1/1452 ( <0.1%) | 230915                                                                 |
| Rotator cuff repair                                                 | 1st year         | 1/1452 ( <0.1%) | 242703                                                                 |
|                                                                     | 2nd year         | 1/1206 ( <0.1%) | 240626                                                                 |
|                                                                     | Overall          | 2/1452 ( 0.1%)  | 240626, 242703                                                         |
| Scar excision                                                       | 2nd year         | 1/1206 ( <0.1%) | 160805                                                                 |
|                                                                     | Overall          | 1/1452 ( <0.1%) | 160805                                                                 |
| Skin neoplasm excision                                              | 2nd year         | 1/1206 ( <0.1%) | 243229                                                                 |
|                                                                     | Overall          | 1/1452 ( <0.1%) | 243229                                                                 |
| Tenolysis                                                           | 3rd year         | 1/1012 ( <0.1%) | 241603                                                                 |
|                                                                     | Overall          | 1/1452 ( <0.1%) | 241603                                                                 |
| Tonsillectomy                                                       | 1st year         | 1/1452 ( <0.1%) | 160706                                                                 |
|                                                                     | 2nd year         | 1/1206 ( <0.1%) | 244801                                                                 |
|                                                                     | Overall          | 2/1452 ( 0.1%)  | 160706, 244801                                                         |
| Tooth extraction                                                    | 1st year         | 5/1452 ( 0.3%)  | 160611, 160987, 200510, 210123, 241194                                 |
|                                                                     | 2nd year         | 3/1206 ( 0.2%)  | 120603, 120606, 241730                                                 |
|                                                                     | 3rd year         | 1/1012 ( <0.1%) | 170405                                                                 |
|                                                                     | Overall          | 9/1452 ( 0.6%)  | 120603, 120606, 160611, 160987, 170405, 200510, 210123, 241194, 241730 |
| Umbilical hernia repair                                             | 1st year         | 1/1452 ( <0.1%) | 244410                                                                 |
|                                                                     | Overall          | 1/1452 ( <0.1%) | 244410                                                                 |
| Wisdom teeth removal                                                | 1st year         | 3/1452 ( 0.2%)  | 161404, 161423, 244449                                                 |
|                                                                     | 2nd year         | 3/1206 ( 0.2%)  | 140103, 141024, 161423                                                 |
|                                                                     | Overall          | 5/1452 ( 0.3%)  | 140103, 141024, 161404, 161423, 244449                                 |
| Wrist surgery                                                       | 1st year         | 1/1452 ( <0.1%) | 160608                                                                 |
|                                                                     | Overall          | 1/1452 ( <0.1%) | 160608                                                                 |

Table 14.3.1 / 10: Number of subjects with adverse events including subject identifier and year by treatment (FAS)  
(cont.)

TREATMENT: LCS16

| Primary system organ class<br>Preferred term<br>MedDRA version 14.0 | YEAR OF<br>ONSET | N (%)           | subject identifier                                                                                                             |
|---------------------------------------------------------------------|------------------|-----------------|--------------------------------------------------------------------------------------------------------------------------------|
| Vascular disorders                                                  | 1st year         | 11/1452 ( 0.8%) |                                                                                                                                |
|                                                                     | 2nd year         | 11/1206 ( 0.9%) |                                                                                                                                |
|                                                                     | 3rd year         | 6/1012 ( 0.6%)  |                                                                                                                                |
|                                                                     | Overall          | 26/1452 ( 1.8%) |                                                                                                                                |
| Hot flush                                                           | 1st year         | 1/1452 (<0.1%)  | 140810                                                                                                                         |
|                                                                     | 2nd year         | 1/1206 (<0.1%)  | 140810                                                                                                                         |
|                                                                     | 3rd year         | 2/1012 ( 0.2%)  | 160533, 240618                                                                                                                 |
|                                                                     | Overall          | 3/1452 ( 0.2%)  | 140810, 160533, 240618                                                                                                         |
| Hypertension                                                        | 1st year         | 6/1452 ( 0.4%)  | 150126, 160508, 160966, 241236, 243901, 244905                                                                                 |
|                                                                     | 2nd year         | 7/1206 ( 0.6%)  | 180609, 200712, 240741, 243615, 244305, 244706, 244802                                                                         |
|                                                                     | 3rd year         | 3/1012 ( 0.3%)  | 150504, 240325, 244446                                                                                                         |
|                                                                     | Overall          | 16/1452 ( 1.1%) | 150126, 150504, 160508, 160966, 180609, 200712, 240325, 240741, 241236, 243615, 243901, 244305, 244446, 244706, 244802, 244905 |
| Hypotension                                                         | 1st year         | 2/1452 ( 0.1%)  | 120211, 120405                                                                                                                 |
|                                                                     | Overall          | 2/1452 ( 0.1%)  | 120211, 120405                                                                                                                 |
| Phlebitis                                                           | 2nd year         | 1/1206 (<0.1%)  | 242704                                                                                                                         |
|                                                                     | Overall          | 1/1452 (<0.1%)  | 242704                                                                                                                         |
| Varicose vein                                                       | 1st year         | 2/1452 ( 0.1%)  | 160534, 180609                                                                                                                 |
|                                                                     | 2nd year         | 3/1206 ( 0.2%)  | 180609, 180732, 244704                                                                                                         |
|                                                                     | 3rd year         | 1/1012 (<0.1%)  | 170104                                                                                                                         |
|                                                                     | Overall          | 5/1452 ( 0.3%)  | 160534, 170104, 180609, 180732, 244704                                                                                         |
| Vein pain                                                           | 2nd year         | 1/1206 (<0.1%)  | 180609                                                                                                                         |
|                                                                     | Overall          | 1/1452 (<0.1%)  | 180609                                                                                                                         |

Note: A subject is counted only once within each preferred term of any primary SOC.

Note: Denominator is number of subjects available at the START of the year or all subjects for overall

Note: Adverse events are sorted in alphabetical order by primary SOC and preferred term.

Global Biostatistics: /by-sasp/patdb/projects/de04209/310442/stat/prod\_interim03/pgms/t-ae-cat.sas epkll 12OCT2011 11:21

End of table

**Table 14.3.1 / 11: Number of subjects with study drug-related adverse events by primary system organ class and preferred term (FAS)**

| Primary system organ class<br>Preferred term<br>MedDRA version 14.0 | LCS12<br>N=1432 (100%) | LCS16<br>N=1452 (100%) | Total<br>N=2884 (100%) |
|---------------------------------------------------------------------|------------------------|------------------------|------------------------|
| Number of subjects (%) with at least one such adverse event         | 710 ( 49.6%)           | 756 ( 52.1%)           | 1466 ( 50.8%)          |
| Blood and lymphatic system disorders                                | 4 ( 0.3%)              | 1 (<0.1%)              | 5 ( 0.2%)              |
| Anaemia                                                             | 3 ( 0.2%)              | 1 (<0.1%)              | 4 ( 0.1%)              |
| Leukocytosis                                                        | 1 (<0.1%)              | 0                      | 1 (<0.1%)              |
| Lymphadenitis                                                       | 1 (<0.1%)              | 0                      | 1 (<0.1%)              |
| Ear and labyrinth disorders                                         | 2 ( 0.1%)              | 2 ( 0.1%)              | 4 ( 0.1%)              |
| Motion sickness                                                     | 1 (<0.1%)              | 0                      | 1 (<0.1%)              |
| Vertigo                                                             | 1 (<0.1%)              | 2 ( 0.1%)              | 3 ( 0.1%)              |
| Endocrine disorders                                                 | 0                      | 1 (<0.1%)              | 1 (<0.1%)              |
| Goitre                                                              | 0                      | 1 (<0.1%)              | 1 (<0.1%)              |
| Eye disorders                                                       | 0                      | 1 (<0.1%)              | 1 (<0.1%)              |
| Blepharitis                                                         | 0                      | 1 (<0.1%)              | 1 (<0.1%)              |
| Chalazion                                                           | 0                      | 1 (<0.1%)              | 1 (<0.1%)              |
| Gastrointestinal disorders                                          | 112 ( 7.8%)            | 90 ( 6.2%)             | 202 ( 7.0%)            |
| Abdominal discomfort                                                | 0                      | 1 (<0.1%)              | 1 (<0.1%)              |
| Abdominal distension                                                | 11 ( 0.8%)             | 7 ( 0.5%)              | 18 ( 0.6%)             |
| Abdominal pain                                                      | 48 ( 3.4%)             | 37 ( 2.5%)             | 85 ( 2.9%)             |
| Abdominal pain lower                                                | 30 ( 2.1%)             | 31 ( 2.1%)             | 61 ( 2.1%)             |
| Abdominal pain upper                                                | 1 (<0.1%)              | 1 (<0.1%)              | 2 (<0.1%)              |
| Abdominal tenderness                                                | 1 (<0.1%)              | 0                      | 1 (<0.1%)              |
| Aphthous stomatitis                                                 | 0                      | 1 (<0.1%)              | 1 (<0.1%)              |
| Constipation                                                        | 3 ( 0.2%)              | 1 (<0.1%)              | 4 ( 0.1%)              |
| Dyspepsia                                                           | 0                      | 1 (<0.1%)              | 1 (<0.1%)              |
| Flatulence                                                          | 2 ( 0.1%)              | 0                      | 2 (<0.1%)              |
| Frequent bowel movements                                            | 1 (<0.1%)              | 0                      | 1 (<0.1%)              |
| Gastrointestinal disorder                                           | 1 (<0.1%)              | 0                      | 1 (<0.1%)              |
| Gastroesophageal reflux disease                                     | 0                      | 1 (<0.1%)              | 1 (<0.1%)              |
| Nausea                                                              | 24 ( 1.7%)             | 15 ( 1.0%)             | 39 ( 1.4%)             |
| Vomiting                                                            | 3 ( 0.2%)              | 4 ( 0.3%)              | 7 ( 0.2%)              |

**Table 14.3.1 / 11: Number of subjects with study drug-related adverse events by primary system organ class and preferred term (FAS)**

| Primary system organ class                           | LCS12         | LCS16         | Total         |
|------------------------------------------------------|---------------|---------------|---------------|
| Preferred term                                       | N=1432 (100%) | N=1452 (100%) | N=2884 (100%) |
| MedDRA version 14.0                                  |               |               |               |
| General disorders and administration site conditions | 35 ( 2.4%)    | 48 ( 3.3%)    | 83 ( 2.9%)    |
| Cyst                                                 | 1 ( <0.1%)    | 0             | 1 ( <0.1%)    |
| Device dislocation                                   | 2 ( 0.1%)     | 4 ( 0.3%)     | 6 ( 0.2%)     |
| Device expulsion                                     | 21 ( 1.5%)    | 25 ( 1.7%)    | 46 ( 1.6%)    |
| Fatigue                                              | 6 ( 0.4%)     | 6 ( 0.4%)     | 12 ( 0.4%)    |
| Feeling cold                                         | 0             | 1 ( <0.1%)    | 1 ( <0.1%)    |
| Feeling hot                                          | 0             | 1 ( <0.1%)    | 1 ( <0.1%)    |
| Generalised oedema                                   | 1 ( <0.1%)    | 0             | 1 ( <0.1%)    |
| Hunger                                               | 0             | 1 ( <0.1%)    | 1 ( <0.1%)    |
| Irritability                                         | 2 ( 0.1%)     | 6 ( 0.4%)     | 8 ( 0.3%)     |
| Localised oedema                                     | 0             | 1 ( <0.1%)    | 1 ( <0.1%)    |
| Oedema                                               | 0             | 1 ( <0.1%)    | 1 ( <0.1%)    |
| Oedema peripheral                                    | 1 ( <0.1%)    | 1 ( <0.1%)    | 2 ( <0.1%)    |
| Pain                                                 | 2 ( 0.1%)     | 1 ( <0.1%)    | 3 ( 0.1%)     |
| Pyrexia                                              | 2 ( 0.1%)     | 1 ( <0.1%)    | 3 ( 0.1%)     |
| Infections and infestations                          | 85 ( 5.9%)    | 85 ( 5.9%)    | 170 ( 5.9%)   |
| Candidiasis                                          | 4 ( 0.3%)     | 1 ( <0.1%)    | 5 ( 0.2%)     |
| Cervicitis                                           | 1 ( <0.1%)    | 7 ( 0.5%)     | 8 ( 0.3%)     |
| Cystitis                                             | 2 ( 0.1%)     | 1 ( <0.1%)    | 3 ( 0.1%)     |
| Endometritis                                         | 8 ( 0.6%)     | 10 ( 0.7%)    | 18 ( 0.6%)    |
| Escherichia vaginitis                                | 1 ( <0.1%)    | 0             | 1 ( <0.1%)    |
| Fungal infection                                     | 1 ( <0.1%)    | 1 ( <0.1%)    | 2 ( <0.1%)    |
| Gastroenteritis                                      | 1 ( <0.1%)    | 0             | 1 ( <0.1%)    |
| Genital candidiasis                                  | 0             | 1 ( <0.1%)    | 1 ( <0.1%)    |
| Pelvic inflammatory disease                          | 4 ( 0.3%)     | 5 ( 0.3%)     | 9 ( 0.3%)     |
| Pyelonephritis                                       | 1 ( <0.1%)    | 0             | 1 ( <0.1%)    |
| Salpingitis                                          | 1 ( <0.1%)    | 0             | 1 ( <0.1%)    |
| Salpingo-oophoritis                                  | 1 ( <0.1%)    | 3 ( 0.2%)     | 4 ( 0.1%)     |
| Tonsillitis                                          | 1 ( <0.1%)    | 0             | 1 ( <0.1%)    |
| Tubo-ovarian abscess                                 | 1 ( <0.1%)    | 0             | 1 ( <0.1%)    |
| Upper respiratory tract infection                    | 1 ( <0.1%)    | 0             | 1 ( <0.1%)    |
| Urinary tract infection                              | 6 ( 0.4%)     | 2 ( 0.1%)     | 8 ( 0.3%)     |
| Uterine infection                                    | 0             | 1 ( <0.1%)    | 1 ( <0.1%)    |
| Vaginal infection                                    | 10 ( 0.7%)    | 10 ( 0.7%)    | 20 ( 0.7%)    |
| Vaginitis bacterial                                  | 24 ( 1.7%)    | 27 ( 1.9%)    | 51 ( 1.8%)    |
| Vulvitis                                             | 2 ( 0.1%)     | 1 ( <0.1%)    | 3 ( 0.1%)     |
| Vulvovaginal candidiasis                             | 9 ( 0.6%)     | 8 ( 0.6%)     | 17 ( 0.6%)    |
| Vulvovaginal mycotic infection                       | 19 ( 1.3%)    | 19 ( 1.3%)    | 38 ( 1.3%)    |
| Vulvovaginitis                                       | 1 ( <0.1%)    | 3 ( 0.2%)     | 4 ( 0.1%)     |

**Table 14.3.1 / 11: Number of subjects with study drug-related adverse events by primary system organ class and preferred term (FAS)**

| Primary system organ class<br>Preferred term<br>MedDRA version 14.0 | LCS12<br>N=1432 (100%) | LCS16<br>N=1452 (100%) | Total<br>N=2884 (100%) |
|---------------------------------------------------------------------|------------------------|------------------------|------------------------|
| Injury, poisoning and procedural complications                      | 29 ( 2.0%)             | 24 ( 1.7%)             | 53 ( 1.8%)             |
| Post procedural haemorrhage                                         | 1 (<0.1%)              | 0                      | 1 (<0.1%)              |
| Procedural pain                                                     | 28 ( 2.0%)             | 24 ( 1.7%)             | 52 ( 1.8%)             |
| Investigations                                                      | 44 ( 3.1%)             | 56 ( 3.9%)             | 100 ( 3.5%)            |
| Alanine aminotransferase increased                                  | 3 ( 0.2%)              | 2 ( 0.1%)              | 5 ( 0.2%)              |
| Aspartate aminotransferase increased                                | 3 ( 0.2%)              | 1 (<0.1%)              | 4 ( 0.1%)              |
| Blood cholesterol increased                                         | 1 (<0.1%)              | 0                      | 1 (<0.1%)              |
| Blood triglycerides increased                                       | 1 (<0.1%)              | 2 ( 0.1%)              | 3 ( 0.1%)              |
| Gamma-glutamyltransferase increased                                 | 0                      | 2 ( 0.1%)              | 2 (<0.1%)              |
| Glycosylated haemoglobin increased                                  | 1 (<0.1%)              | 0                      | 1 (<0.1%)              |
| Haemoglobin decreased                                               | 1 (<0.1%)              | 1 (<0.1%)              | 2 (<0.1%)              |
| Smear cervix abnormal                                               | 2 ( 0.1%)              | 1 (<0.1%)              | 3 ( 0.1%)              |
| Ultrasound ovary abnormal                                           | 1 (<0.1%)              | 0                      | 1 (<0.1%)              |
| Weight decreased                                                    | 0                      | 1 (<0.1%)              | 1 (<0.1%)              |
| Weight increased                                                    | 34 ( 2.4%)             | 48 ( 3.3%)             | 82 ( 2.8%)             |
| White blood cell count increased                                    | 1 (<0.1%)              | 0                      | 1 (<0.1%)              |
| Metabolism and nutrition disorders                                  | 3 ( 0.2%)              | 3 ( 0.2%)              | 6 ( 0.2%)              |
| Fluid retention                                                     | 1 (<0.1%)              | 1 (<0.1%)              | 2 (<0.1%)              |
| Hypokalaemia                                                        | 1 (<0.1%)              | 0                      | 1 (<0.1%)              |
| Hyponatraemia                                                       | 1 (<0.1%)              | 0                      | 1 (<0.1%)              |
| Increased appetite                                                  | 1 (<0.1%)              | 1 (<0.1%)              | 2 (<0.1%)              |
| Weight fluctuation                                                  | 0                      | 1 (<0.1%)              | 1 (<0.1%)              |
| Musculoskeletal and connective tissue disorders                     | 7 ( 0.5%)              | 11 ( 0.8%)             | 18 ( 0.6%)             |
| Back pain                                                           | 6 ( 0.4%)              | 10 ( 0.7%)             | 16 ( 0.6%)             |
| Muscle spasms                                                       | 0                      | 1 (<0.1%)              | 1 (<0.1%)              |
| Musculoskeletal pain                                                | 1 (<0.1%)              | 0                      | 1 (<0.1%)              |
| Neoplasms benign, malignant and unspecified (incl cysts and polyps) | 7 ( 0.5%)              | 4 ( 0.3%)              | 11 ( 0.4%)             |
| Fibroadenoma of breast                                              | 2 ( 0.1%)              | 0                      | 2 (<0.1%)              |
| Haemangioma                                                         | 1 (<0.1%)              | 0                      | 1 (<0.1%)              |
| Melanocytic naevus                                                  | 0                      | 1 (<0.1%)              | 1 (<0.1%)              |
| Uterine leiomyoma                                                   | 4 ( 0.3%)              | 3 ( 0.2%)              | 7 ( 0.2%)              |

**Table 14.3.1 / 11: Number of subjects with study drug-related adverse events by primary system organ class and preferred term (FAS)**

| Primary system organ class<br>Preferred term<br>MedDRA version 14.0 | LCS12<br>N=1432 (100%) | LCS16<br>N=1452 (100%) | Total<br>N=2884 (100%) |
|---------------------------------------------------------------------|------------------------|------------------------|------------------------|
| Nervous system disorders                                            | 60 ( 4.2%)             | 60 ( 4.1%)             | 120 ( 4.2%)            |
| Dizziness                                                           | 1 ( <0.1%)             | 2 ( 0.1%)              | 3 ( 0.1%)              |
| Headache                                                            | 47 ( 3.3%)             | 48 ( 3.3%)             | 95 ( 3.3%)             |
| Migraine                                                            | 11 ( 0.8%)             | 8 ( 0.6%)              | 19 ( 0.7%)             |
| Migraine with aura                                                  | 2 ( 0.1%)              | 0                      | 2 ( <0.1%)             |
| Paraesthesia                                                        | 0                      | 1 ( <0.1%)             | 1 ( <0.1%)             |
| Presyncope                                                          | 0                      | 2 ( 0.1%)              | 2 ( <0.1%)             |
| Somnolence                                                          | 1 ( <0.1%)             | 0                      | 1 ( <0.1%)             |
| Pregnancy, puerperium and perinatal conditions                      | 3 ( 0.2%)              | 8 ( 0.6%)              | 11 ( 0.4%)             |
| Abortion spontaneous                                                | 1 ( <0.1%)             | 0                      | 1 ( <0.1%)             |
| Abortion spontaneous incomplete                                     | 0                      | 1 ( <0.1%)             | 1 ( <0.1%)             |
| Ectopic pregnancy                                                   | 2 ( 0.1%)              | 6 ( 0.4%)              | 8 ( 0.3%)              |
| Premature separation of placenta                                    | 1 ( <0.1%)             | 0                      | 1 ( <0.1%)             |
| Ruptured ectopic pregnancy                                          | 0                      | 1 ( <0.1%)             | 1 ( <0.1%)             |
| Psychiatric disorders                                               | 68 ( 4.7%)             | 43 ( 3.0%)             | 111 ( 3.8%)            |
| Affect lability                                                     | 4 ( 0.3%)              | 1 ( <0.1%)             | 5 ( 0.2%)              |
| Aggression                                                          | 1 ( <0.1%)             | 0                      | 1 ( <0.1%)             |
| Anxiety                                                             | 6 ( 0.4%)              | 2 ( 0.1%)              | 8 ( 0.3%)              |
| Depressed mood                                                      | 4 ( 0.3%)              | 2 ( 0.1%)              | 6 ( 0.2%)              |
| Depression                                                          | 13 ( 0.9%)             | 8 ( 0.6%)              | 21 ( 0.7%)             |
| Depressive symptom                                                  | 1 ( <0.1%)             | 0                      | 1 ( <0.1%)             |
| Insomnia                                                            | 3 ( 0.2%)              | 1 ( <0.1%)             | 4 ( 0.1%)              |
| Libido decreased                                                    | 22 ( 1.5%)             | 17 ( 1.2%)             | 39 ( 1.4%)             |
| Libido increased                                                    | 1 ( <0.1%)             | 1 ( <0.1%)             | 2 ( <0.1%)             |
| Loss of libido                                                      | 2 ( 0.1%)              | 0                      | 2 ( <0.1%)             |
| Mood altered                                                        | 12 ( 0.8%)             | 10 ( 0.7%)             | 22 ( 0.8%)             |
| Mood swings                                                         | 11 ( 0.8%)             | 6 ( 0.4%)              | 17 ( 0.6%)             |
| Nervousness                                                         | 0                      | 1 ( <0.1%)             | 1 ( <0.1%)             |
| Panic attack                                                        | 0                      | 1 ( <0.1%)             | 1 ( <0.1%)             |
| Stress                                                              | 1 ( <0.1%)             | 0                      | 1 ( <0.1%)             |
| Renal and urinary disorders                                         | 2 ( 0.1%)              | 1 ( <0.1%)             | 3 ( 0.1%)              |
| Chromaturia                                                         | 0                      | 1 ( <0.1%)             | 1 ( <0.1%)             |
| Dysuria                                                             | 1 ( <0.1%)             | 0                      | 1 ( <0.1%)             |
| Urinary tract disorder                                              | 1 ( <0.1%)             | 0                      | 1 ( <0.1%)             |
| Urine odour abnormal                                                | 0                      | 1 ( <0.1%)             | 1 ( <0.1%)             |

**Table 14.3.1 / 11: Number of subjects with study drug-related adverse events by primary system organ class and preferred term (FAS)**

| Primary system organ class<br>Preferred term<br>MedDRA version 14.0 | LCS12<br>N=1432 (100%) | LCS16<br>N=1452 (100%) | Total<br>N=2884 (100%) |
|---------------------------------------------------------------------|------------------------|------------------------|------------------------|
| Reproductive system and breast disorders                            | 438 ( 30.6%)           | 502 ( 34.6%)           | 940 ( 32.6%)           |
| Adnexa uteri pain                                                   | 1 ( <0.1%)             | 1 ( <0.1%)             | 2 ( <0.1%)             |
| Amenorrhoea                                                         | 0                      | 5 ( 0.3%)              | 5 ( 0.2%)              |
| Atrophic vulvovaginitis                                             | 1 ( <0.1%)             | 0                      | 1 ( <0.1%)             |
| Breast cyst                                                         | 1 ( <0.1%)             | 0                      | 1 ( <0.1%)             |
| Breast discharge                                                    | 0                      | 3 ( 0.2%)              | 3 ( 0.1%)              |
| Breast discomfort                                                   | 4 ( 0.3%)              | 7 ( 0.5%)              | 11 ( 0.4%)             |
| Breast engorgement                                                  | 1 ( <0.1%)             | 0                      | 1 ( <0.1%)             |
| Breast enlargement                                                  | 0                      | 2 ( 0.1%)              | 2 ( <0.1%)             |
| Breast mass                                                         | 5 ( 0.3%)              | 2 ( 0.1%)              | 7 ( 0.2%)              |
| Breast pain                                                         | 23 ( 1.6%)             | 24 ( 1.7%)             | 47 ( 1.6%)             |
| Breast swelling                                                     | 1 ( <0.1%)             | 1 ( <0.1%)             | 2 ( <0.1%)             |
| Breast tenderness                                                   | 21 ( 1.5%)             | 30 ( 2.1%)             | 51 ( 1.8%)             |
| Cervical discharge                                                  | 1 ( <0.1%)             | 0                      | 1 ( <0.1%)             |
| Cervical dysplasia                                                  | 6 ( 0.4%)              | 4 ( 0.3%)              | 10 ( 0.3%)             |
| Cervical polyp                                                      | 0                      | 1 ( <0.1%)             | 1 ( <0.1%)             |
| Cervix erythema                                                     | 0                      | 1 ( <0.1%)             | 1 ( <0.1%)             |
| Coital bleeding                                                     | 9 ( 0.6%)              | 10 ( 0.7%)             | 19 ( 0.7%)             |
| Dysfunctional uterine bleeding                                      | 2 ( 0.1%)              | 3 ( 0.2%)              | 5 ( 0.2%)              |
| Dysmenorrhoea                                                       | 98 ( 6.8%)             | 76 ( 5.2%)             | 174 ( 6.0%)            |
| Dyspareunia                                                         | 16 ( 1.1%)             | 13 ( 0.9%)             | 29 ( 1.0%)             |
| Ectropion of cervix                                                 | 1 ( <0.1%)             | 1 ( <0.1%)             | 2 ( <0.1%)             |
| Endometriosis                                                       | 0                      | 1 ( <0.1%)             | 1 ( <0.1%)             |
| Fibrocystic breast disease                                          | 0                      | 1 ( <0.1%)             | 1 ( <0.1%)             |
| Galactorrhoea                                                       | 1 ( <0.1%)             | 1 ( <0.1%)             | 2 ( <0.1%)             |
| Genital discharge                                                   | 5 ( 0.3%)              | 2 ( 0.1%)              | 7 ( 0.2%)              |
| Genital haemorrhage                                                 | 1 ( <0.1%)             | 0                      | 1 ( <0.1%)             |
| Haemorrhagic ovarian cyst                                           | 8 ( 0.6%)              | 9 ( 0.6%)              | 17 ( 0.6%)             |
| Hydrometra                                                          | 2 ( 0.1%)              | 0                      | 2 ( <0.1%)             |
| Hypomenorrhoea                                                      | 2 ( 0.1%)              | 1 ( <0.1%)             | 3 ( 0.1%)              |
| Menometrorrhagia                                                    | 2 ( 0.1%)              | 0                      | 2 ( <0.1%)             |
| Menorrhagia                                                         | 4 ( 0.3%)              | 9 ( 0.6%)              | 13 ( 0.5%)             |
| Menstrual disorder                                                  | 3 ( 0.2%)              | 1 ( <0.1%)             | 4 ( 0.1%)              |
| Menstruation irregular                                              | 4 ( 0.3%)              | 3 ( 0.2%)              | 7 ( 0.2%)              |
| Metrorrhagia                                                        | 13 ( 0.9%)             | 11 ( 0.8%)             | 24 ( 0.8%)             |
| Nipple exudate bloody                                               | 0                      | 1 ( <0.1%)             | 1 ( <0.1%)             |
| Nipple pain                                                         | 2 ( 0.1%)              | 1 ( <0.1%)             | 3 ( 0.1%)              |
| Oligomenorrhoea                                                     | 0                      | 2 ( 0.1%)              | 2 ( <0.1%)             |
| Ovarian cyst                                                        | 110 ( 7.7%)            | 201 ( 13.8%)           | 311 ( 10.8%)           |
| Ovarian cyst ruptured                                               | 1 ( <0.1%)             | 6 ( 0.4%)              | 7 ( 0.2%)              |
| Ovarian enlargement                                                 | 0                      | 1 ( <0.1%)             | 1 ( <0.1%)             |
| Ovarian mass                                                        | 0                      | 2 ( 0.1%)              | 2 ( <0.1%)             |
| Ovulation pain                                                      | 4 ( 0.3%)              | 0                      | 4 ( 0.1%)              |



**Table 14.3.1 / 11: Number of subjects with study drug-related adverse events by primary system organ class and preferred term (FAS)**

| Primary system organ class<br>Preferred term<br>MedDRA version 14.0 | LCS12<br>N=1432 (100%) | LCS16<br>N=1452 (100%) | Total<br>N=2884 (100%) |
|---------------------------------------------------------------------|------------------------|------------------------|------------------------|
| Pelvic congestion                                                   | 1 ( <0.1%)             | 0                      | 1 ( <0.1%)             |
| Pelvic discomfort                                                   | 3 ( 0.2%)              | 1 ( <0.1%)             | 4 ( 0.1%)              |
| Pelvic fluid collection                                             | 1 ( <0.1%)             | 0                      | 1 ( <0.1%)             |
| Pelvic pain                                                         | 68 ( 4.7%)             | 87 ( 6.0%)             | 155 ( 5.4%)            |
| Polycystic ovaries                                                  | 1 ( <0.1%)             | 0                      | 1 ( <0.1%)             |
| Polymenorrhoea                                                      | 1 ( <0.1%)             | 1 ( <0.1%)             | 2 ( <0.1%)             |
| Premenstrual syndrome                                               | 10 ( 0.7%)             | 9 ( 0.6%)              | 19 ( 0.7%)             |
| Uterine cervical erosion                                            | 1 ( <0.1%)             | 0                      | 1 ( <0.1%)             |
| Uterine cervical pain                                               | 1 ( <0.1%)             | 0                      | 1 ( <0.1%)             |
| Uterine haemorrhage                                                 | 7 ( 0.5%)              | 6 ( 0.4%)              | 13 ( 0.5%)             |
| Uterine inflammation                                                | 0                      | 1 ( <0.1%)             | 1 ( <0.1%)             |
| Uterine pain                                                        | 1 ( <0.1%)             | 2 ( 0.1%)              | 3 ( 0.1%)              |
| Uterine polyp                                                       | 2 ( 0.1%)              | 0                      | 2 ( <0.1%)             |
| Uterine spasm                                                       | 28 ( 2.0%)             | 37 ( 2.5%)             | 65 ( 2.3%)             |
| Uterine tenderness                                                  | 1 ( <0.1%)             | 2 ( 0.1%)              | 3 ( 0.1%)              |
| Vaginal discharge                                                   | 28 ( 2.0%)             | 28 ( 1.9%)             | 56 ( 1.9%)             |
| Vaginal disorder                                                    | 1 ( <0.1%)             | 0                      | 1 ( <0.1%)             |
| Vaginal haemorrhage                                                 | 65 ( 4.5%)             | 69 ( 4.8%)             | 134 ( 4.6%)            |
| Vaginal odour                                                       | 1 ( <0.1%)             | 1 ( <0.1%)             | 2 ( <0.1%)             |
| Vaginal ulceration                                                  | 0                      | 1 ( <0.1%)             | 1 ( <0.1%)             |
| Vulvovaginal burning sensation                                      | 1 ( <0.1%)             | 0                      | 1 ( <0.1%)             |
| Vulvovaginal discomfort                                             | 1 ( <0.1%)             | 0                      | 1 ( <0.1%)             |
| Vulvovaginal dryness                                                | 2 ( 0.1%)              | 5 ( 0.3%)              | 7 ( 0.2%)              |
| Vulvovaginal pain                                                   | 2 ( 0.1%)              | 0                      | 2 ( <0.1%)             |
| Vulvovaginal pruritus                                               | 4 ( 0.3%)              | 2 ( 0.1%)              | 6 ( 0.2%)              |

**Table 14.3.1 / 11: Number of subjects with study drug-related adverse events by primary system organ class and preferred term (FAS)**

| Primary system organ class             | LCS12         | LCS16         | Total         |
|----------------------------------------|---------------|---------------|---------------|
| Preferred term                         | N=1432 (100%) | N=1452 (100%) | N=2884 (100%) |
| MedDRA version 14.0                    |               |               |               |
| Skin and subcutaneous tissue disorders | 162 ( 11.3%)  | 170 ( 11.7%)  | 332 ( 11.5%)  |
| Acne                                   | 144 ( 10.1%)  | 144 ( 9.9%)   | 288 ( 10.0%)  |
| Acne cystic                            | 1 ( <0.1%)    | 0             | 1 ( <0.1%)    |
| Alopecia                               | 8 ( 0.6%)     | 6 ( 0.4%)     | 14 ( 0.5%)    |
| Chloasma                               | 3 ( 0.2%)     | 0             | 3 ( 0.1%)     |
| Dandruff                               | 1 ( <0.1%)    | 1 ( <0.1%)    | 2 ( <0.1%)    |
| Dermatitis                             | 0             | 1 ( <0.1%)    | 1 ( <0.1%)    |
| Eczema                                 | 0             | 1 ( <0.1%)    | 1 ( <0.1%)    |
| Hirsutism                              | 7 ( 0.5%)     | 8 ( 0.6%)     | 15 ( 0.5%)    |
| Hyperhidrosis                          | 1 ( <0.1%)    | 0             | 1 ( <0.1%)    |
| Hypertrichosis                         | 2 ( 0.1%)     | 1 ( <0.1%)    | 3 ( 0.1%)     |
| Psoriasis                              | 0             | 1 ( <0.1%)    | 1 ( <0.1%)    |
| Rash                                   | 0             | 1 ( <0.1%)    | 1 ( <0.1%)    |
| Rash papular                           | 1 ( <0.1%)    | 0             | 1 ( <0.1%)    |
| Rosacea                                | 0             | 1 ( <0.1%)    | 1 ( <0.1%)    |
| Seborrhoea                             | 6 ( 0.4%)     | 10 ( 0.7%)    | 16 ( 0.6%)    |
| Skin irritation                        | 0             | 1 ( <0.1%)    | 1 ( <0.1%)    |
| Skin odour abnormal                    | 0             | 1 ( <0.1%)    | 1 ( <0.1%)    |
| Urticaria                              | 1 ( <0.1%)    | 0             | 1 ( <0.1%)    |
| Vascular disorders                     | 3 ( 0.2%)     | 4 ( 0.3%)     | 7 ( 0.2%)     |
| Hot flush                              | 2 ( 0.1%)     | 1 ( <0.1%)    | 3 ( 0.1%)     |
| Hypertension                           | 0             | 2 ( 0.1%)     | 2 ( <0.1%)    |
| Phlebitis                              | 0             | 1 ( <0.1%)    | 1 ( <0.1%)    |
| Varicose vein                          | 1 ( <0.1%)    | 0             | 1 ( <0.1%)    |

Note: A subject is counted only once within each preferred term of any primary SOC.

Note: Adverse events are sorted in alphabetical order by primary SOC and preferred term.

Note: Missing, possible, probable and definite for drug relationship is counted as drug-related.

Global Biostatistics: /by-sasp/patdb/projects/de04209/310442/stat/prod\_interim03/pgms/t-ae.sas epkll 12OCT2011 11:24

End of table

**Table 14.3.1 / 12: Number of subjects with adverse events causing discontinuation of study drug by primary system organ class and preferred term (FAS)**

| Primary system organ class<br>Preferred term<br>MedDRA version 14.0 | LCS12<br>N=1432 (100%) | LCS16<br>N=1452 (100%) | Total<br>N=2884 (100%) |
|---------------------------------------------------------------------|------------------------|------------------------|------------------------|
| Number of subjects (%) with at least one such adverse event         | 319 ( 22.3%)           | 290 ( 20.0%)           | 609 ( 21.1%)           |
| Blood and lymphatic system disorders                                | 2 ( 0.1%)              | 0                      | 2 ( <0.1%)             |
| Lymphadenitis                                                       | 2 ( 0.1%)              | 0                      | 2 ( <0.1%)             |
| Cardiac disorders                                                   | 0                      | 1 ( <0.1%)             | 1 ( <0.1%)             |
| Palpitations                                                        | 0                      | 1 ( <0.1%)             | 1 ( <0.1%)             |
| Ear and labyrinth disorders                                         | 0                      | 1 ( <0.1%)             | 1 ( <0.1%)             |
| Vertigo                                                             | 0                      | 1 ( <0.1%)             | 1 ( <0.1%)             |
| Eye disorders                                                       | 1 ( <0.1%)             | 1 ( <0.1%)             | 2 ( <0.1%)             |
| Blepharitis                                                         | 0                      | 1 ( <0.1%)             | 1 ( <0.1%)             |
| Chalazion                                                           | 0                      | 1 ( <0.1%)             | 1 ( <0.1%)             |
| Iridocyclitis                                                       | 1 ( <0.1%)             | 0                      | 1 ( <0.1%)             |
| Gastrointestinal disorders                                          | 49 ( 3.4%)             | 28 ( 1.9%)             | 77 ( 2.7%)             |
| Abdominal distension                                                | 8 ( 0.6%)              | 2 ( 0.1%)              | 10 ( 0.3%)             |
| Abdominal pain                                                      | 19 ( 1.3%)             | 14 ( 1.0%)             | 33 ( 1.1%)             |
| Abdominal pain lower                                                | 17 ( 1.2%)             | 9 ( 0.6%)              | 26 ( 0.9%)             |
| Constipation                                                        | 1 ( <0.1%)             | 0                      | 1 ( <0.1%)             |
| Frequent bowel movements                                            | 1 ( <0.1%)             | 0                      | 1 ( <0.1%)             |
| Gastroesophageal reflux disease                                     | 1 ( <0.1%)             | 0                      | 1 ( <0.1%)             |
| Irritable bowel syndrome                                            | 1 ( <0.1%)             | 0                      | 1 ( <0.1%)             |
| Nausea                                                              | 6 ( 0.4%)              | 4 ( 0.3%)              | 10 ( 0.3%)             |
| Vomiting                                                            | 1 ( <0.1%)             | 0                      | 1 ( <0.1%)             |
| General disorders and administration site conditions                | 53 ( 3.7%)             | 46 ( 3.2%)             | 99 ( 3.4%)             |
| Asthenia                                                            | 1 ( <0.1%)             | 0                      | 1 ( <0.1%)             |
| Device dislocation                                                  | 3 ( 0.2%)              | 5 ( 0.3%)              | 8 ( 0.3%)              |
| Device expulsion                                                    | 45 ( 3.1%)             | 36 ( 2.5%)             | 81 ( 2.8%)             |
| Fatigue                                                             | 3 ( 0.2%)              | 3 ( 0.2%)              | 6 ( 0.2%)              |
| Irritability                                                        | 1 ( <0.1%)             | 0                      | 1 ( <0.1%)             |
| Oedema                                                              | 0                      | 1 ( <0.1%)             | 1 ( <0.1%)             |
| Oedema peripheral                                                   | 0                      | 1 ( <0.1%)             | 1 ( <0.1%)             |

**Table 14.3.1 / 12: Number of subjects with adverse events causing discontinuation of study drug by primary system organ class and preferred term (FAS)**

| Primary system organ class<br>Preferred term<br>MedDRA version 14.0 | LCS12<br>N=1432 (100%) | LCS16<br>N=1452 (100%) | Total<br>N=2884 (100%) |
|---------------------------------------------------------------------|------------------------|------------------------|------------------------|
| <b>Infections and infestations</b>                                  | 22 ( 1.5%)             | 24 ( 1.7%)             | 46 ( 1.6%)             |
| Cervicitis                                                          | 0                      | 1 (<0.1%)              | 1 (<0.1%)              |
| Endometritis                                                        | 1 (<0.1%)              | 2 ( 0.1%)              | 3 ( 0.1%)              |
| Genital herpes                                                      | 1 (<0.1%)              | 0                      | 1 (<0.1%)              |
| Gynaecological chlamydia infection                                  | 1 (<0.1%)              | 1 (<0.1%)              | 2 (<0.1%)              |
| Influenza                                                           | 1 (<0.1%)              | 0                      | 1 (<0.1%)              |
| Pelvic inflammatory disease                                         | 5 ( 0.3%)              | 5 ( 0.3%)              | 10 ( 0.3%)             |
| Pyelonephritis                                                      | 2 ( 0.1%)              | 1 (<0.1%)              | 3 ( 0.1%)              |
| Salpingo-oophoritis                                                 | 1 (<0.1%)              | 1 (<0.1%)              | 2 (<0.1%)              |
| Tonsillitis                                                         | 1 (<0.1%)              | 0                      | 1 (<0.1%)              |
| Tubo-ovarian abscess                                                | 1 (<0.1%)              | 0                      | 1 (<0.1%)              |
| Urinary tract infection                                             | 3 ( 0.2%)              | 3 ( 0.2%)              | 6 ( 0.2%)              |
| Uterine infection                                                   | 0                      | 1 (<0.1%)              | 1 (<0.1%)              |
| Vaginal infection                                                   | 3 ( 0.2%)              | 1 (<0.1%)              | 4 ( 0.1%)              |
| Vaginitis bacterial                                                 | 4 ( 0.3%)              | 4 ( 0.3%)              | 8 ( 0.3%)              |
| Viral infection                                                     | 0                      | 1 (<0.1%)              | 1 (<0.1%)              |
| Vulvovaginal candidiasis                                            | 2 ( 0.1%)              | 0                      | 2 (<0.1%)              |
| Vulvovaginal mycotic infection                                      | 0                      | 2 ( 0.1%)              | 2 (<0.1%)              |
| Vulvovaginitis                                                      | 0                      | 2 ( 0.1%)              | 2 (<0.1%)              |
| <b>Injury, poisoning and procedural complications</b>               |                        |                        |                        |
| Procedural pain                                                     | 1 (<0.1%)              | 0                      | 1 (<0.1%)              |
| Procedural pain                                                     | 1 (<0.1%)              | 0                      | 1 (<0.1%)              |
| <b>Investigations</b>                                               | 11 ( 0.8%)             | 17 ( 1.2%)             | 28 ( 1.0%)             |
| Alanine aminotransferase increased                                  | 1 (<0.1%)              | 0                      | 1 (<0.1%)              |
| Aspartate aminotransferase increased                                | 1 (<0.1%)              | 0                      | 1 (<0.1%)              |
| Haemoglobin decreased                                               | 0                      | 1 (<0.1%)              | 1 (<0.1%)              |
| Human papilloma virus test positive                                 | 0                      | 1 (<0.1%)              | 1 (<0.1%)              |
| Smear cervix abnormal                                               | 0                      | 1 (<0.1%)              | 1 (<0.1%)              |
| Weight increased                                                    | 10 ( 0.7%)             | 14 ( 1.0%)             | 24 ( 0.8%)             |
| <b>Metabolism and nutrition disorders</b>                           |                        |                        |                        |
| Fluid retention                                                     | 1 (<0.1%)              | 1 (<0.1%)              | 2 (<0.1%)              |
| Fluid retention                                                     | 1 (<0.1%)              | 1 (<0.1%)              | 2 (<0.1%)              |
| <b>Musculoskeletal and connective tissue disorders</b>              |                        |                        |                        |
| Arthralgia                                                          | 4 ( 0.3%)              | 2 ( 0.1%)              | 6 ( 0.2%)              |
| Arthralgia                                                          | 1 (<0.1%)              | 0                      | 1 (<0.1%)              |
| Back pain                                                           | 3 ( 0.2%)              | 1 (<0.1%)              | 4 ( 0.1%)              |
| Pain in extremity                                                   | 0                      | 1 (<0.1%)              | 1 (<0.1%)              |

**Table 14.3.1 / 12: Number of subjects with adverse events causing discontinuation of study drug by primary system organ class and preferred term (FAS)**

| Primary system organ class<br>Preferred term<br>MedDRA version 14.0 | LCS12<br>N=1432 (100%) | LCS16<br>N=1452 (100%) | Total<br>N=2884 (100%) |
|---------------------------------------------------------------------|------------------------|------------------------|------------------------|
| Neoplasms benign, malignant and unspecified (incl cysts and polyps) | 3 ( 0.2%)              | 3 ( 0.2%)              | 6 ( 0.2%)              |
| Cervicitis human papilloma virus                                    | 0                      | 1 (<0.1%)              | 1 (<0.1%)              |
| Cervix carcinoma stage 0                                            | 0                      | 1 (<0.1%)              | 1 (<0.1%)              |
| Ovarian germ cell teratoma benign                                   | 1 (<0.1%)              | 0                      | 1 (<0.1%)              |
| Uterine leiomyoma                                                   | 2 ( 0.1%)              | 1 (<0.1%)              | 3 ( 0.1%)              |
| Nervous system disorders                                            | 9 ( 0.6%)              | 9 ( 0.6%)              | 18 ( 0.6%)             |
| Amnesia                                                             | 1 (<0.1%)              | 1 (<0.1%)              | 2 (<0.1%)              |
| Dizziness                                                           | 1 (<0.1%)              | 1 (<0.1%)              | 2 (<0.1%)              |
| Headache                                                            | 6 ( 0.4%)              | 7 ( 0.5%)              | 13 ( 0.5%)             |
| Migraine                                                            | 1 (<0.1%)              | 0                      | 1 (<0.1%)              |
| Paraesthesia                                                        | 0                      | 1 (<0.1%)              | 1 (<0.1%)              |
| Tension headache                                                    | 0                      | 1 (<0.1%)              | 1 (<0.1%)              |
| Pregnancy, puerperium and perinatal conditions                      | 5 ( 0.3%)              | 9 ( 0.6%)              | 14 ( 0.5%)             |
| Abortion spontaneous                                                | 2 ( 0.1%)              | 0                      | 2 (<0.1%)              |
| Abortion spontaneous incomplete                                     | 0                      | 1 (<0.1%)              | 1 (<0.1%)              |
| Blighted ovum                                                       | 0                      | 1 (<0.1%)              | 1 (<0.1%)              |
| Ectopic pregnancy                                                   | 3 ( 0.2%)              | 6 ( 0.4%)              | 9 ( 0.3%)              |
| Premature separation of placenta                                    | 1 (<0.1%)              | 0                      | 1 (<0.1%)              |
| Ruptured ectopic pregnancy                                          | 0                      | 1 (<0.1%)              | 1 (<0.1%)              |
| Psychiatric disorders                                               | 27 ( 1.9%)             | 22 ( 1.5%)             | 49 ( 1.7%)             |
| Affect lability                                                     | 0                      | 1 (<0.1%)              | 1 (<0.1%)              |
| Anxiety                                                             | 4 ( 0.3%)              | 1 (<0.1%)              | 5 ( 0.2%)              |
| Depressed mood                                                      | 1 (<0.1%)              | 2 ( 0.1%)              | 3 ( 0.1%)              |
| Depression                                                          | 6 ( 0.4%)              | 2 ( 0.1%)              | 8 ( 0.3%)              |
| Insomnia                                                            | 1 (<0.1%)              | 1 (<0.1%)              | 2 (<0.1%)              |
| Libido decreased                                                    | 8 ( 0.6%)              | 10 ( 0.7%)             | 18 ( 0.6%)             |
| Loss of libido                                                      | 1 (<0.1%)              | 0                      | 1 (<0.1%)              |
| Mental status changes                                               | 0                      | 1 (<0.1%)              | 1 (<0.1%)              |
| Mood altered                                                        | 7 ( 0.5%)              | 4 ( 0.3%)              | 11 ( 0.4%)             |
| Mood swings                                                         | 5 ( 0.3%)              | 5 ( 0.3%)              | 10 ( 0.3%)             |
| Nervousness                                                         | 0                      | 1 (<0.1%)              | 1 (<0.1%)              |
| Panic attack                                                        | 0                      | 1 (<0.1%)              | 1 (<0.1%)              |
| Renal and urinary disorders                                         | 2 ( 0.1%)              | 0                      | 2 (<0.1%)              |
| Pollakiuria                                                         | 1 (<0.1%)              | 0                      | 1 (<0.1%)              |
| Stress urinary incontinence                                         | 1 (<0.1%)              | 0                      | 1 (<0.1%)              |

**Table 14.3.1 / 12: Number of subjects with adverse events causing discontinuation of study drug by primary system organ class and preferred term (FAS)**

| Primary system organ class               | LCS12         | LCS16         | Total         |
|------------------------------------------|---------------|---------------|---------------|
| Preferred term                           | N=1432 (100%) | N=1452 (100%) | N=2884 (100%) |
| MedDRA version 14.0                      |               |               |               |
| Reproductive system and breast disorders | 142 ( 9.9%)   | 147 ( 10.1%)  | 289 ( 10.0%)  |
| Adnexa uteri pain                        | 0             | 1 ( <0.1%)    | 1 ( <0.1%)    |
| Amenorrhoea                              | 0             | 2 ( 0.1%)     | 2 ( <0.1%)    |
| Atrophic vulvovaginitis                  | 1 ( <0.1%)    | 0             | 1 ( <0.1%)    |
| Breast discomfort                        | 1 ( <0.1%)    | 1 ( <0.1%)    | 2 ( <0.1%)    |
| Breast pain                              | 5 ( 0.3%)     | 1 ( <0.1%)    | 6 ( 0.2%)     |
| Breast tenderness                        | 1 ( <0.1%)    | 0             | 1 ( <0.1%)    |
| Cervical dysplasia                       | 1 ( <0.1%)    | 4 ( 0.3%)     | 5 ( 0.2%)     |
| Coital bleeding                          | 4 ( 0.3%)     | 0             | 4 ( 0.1%)     |
| Dysfunctional uterine bleeding           | 1 ( <0.1%)    | 2 ( 0.1%)     | 3 ( 0.1%)     |
| Dysmenorrhoea                            | 20 ( 1.4%)    | 12 ( 0.8%)    | 32 ( 1.1%)    |
| Dyspareunia                              | 8 ( 0.6%)     | 7 ( 0.5%)     | 15 ( 0.5%)    |
| Ectropion of cervix                      | 1 ( <0.1%)    | 1 ( <0.1%)    | 2 ( <0.1%)    |
| Endometriosis                            | 3 ( 0.2%)     | 2 ( 0.1%)     | 5 ( 0.2%)     |
| Galactorrhoea                            | 0             | 1 ( <0.1%)    | 1 ( <0.1%)    |
| Genital discharge                        | 0             | 1 ( <0.1%)    | 1 ( <0.1%)    |
| Haemorrhagic ovarian cyst                | 2 ( 0.1%)     | 0             | 2 ( <0.1%)    |
| Menometrorrhagia                         | 1 ( <0.1%)    | 0             | 1 ( <0.1%)    |
| Menorrhagia                              | 2 ( 0.1%)     | 6 ( 0.4%)     | 8 ( 0.3%)     |
| Menstrual disorder                       | 1 ( <0.1%)    | 0             | 1 ( <0.1%)    |
| Menstruation irregular                   | 1 ( <0.1%)    | 2 ( 0.1%)     | 3 ( 0.1%)     |
| Metrorrhagia                             | 6 ( 0.4%)     | 5 ( 0.3%)     | 11 ( 0.4%)    |
| Oligomenorrhoea                          | 0             | 2 ( 0.1%)     | 2 ( <0.1%)    |
| Ovarian cyst                             | 3 ( 0.2%)     | 5 ( 0.3%)     | 8 ( 0.3%)     |
| Ovulation pain                           | 1 ( <0.1%)    | 2 ( 0.1%)     | 3 ( 0.1%)     |
| Pelvic discomfort                        | 1 ( <0.1%)    | 1 ( <0.1%)    | 2 ( <0.1%)    |
| Pelvic pain                              | 29 ( 2.0%)    | 39 ( 2.7%)    | 68 ( 2.4%)    |
| Pelvic prolapse                          | 1 ( <0.1%)    | 0             | 1 ( <0.1%)    |
| Polymenorrhoea                           | 0             | 1 ( <0.1%)    | 1 ( <0.1%)    |
| Premenstrual syndrome                    | 0             | 2 ( 0.1%)     | 2 ( <0.1%)    |
| Uterine haemorrhage                      | 6 ( 0.4%)     | 2 ( 0.1%)     | 8 ( 0.3%)     |
| Uterine inflammation                     | 0             | 1 ( <0.1%)    | 1 ( <0.1%)    |
| Uterine prolapse                         | 1 ( <0.1%)    | 0             | 1 ( <0.1%)    |
| Uterine spasm                            | 10 ( 0.7%)    | 8 ( 0.6%)     | 18 ( 0.6%)    |
| Uterine tenderness                       | 1 ( <0.1%)    | 0             | 1 ( <0.1%)    |
| Vaginal discharge                        | 1 ( <0.1%)    | 4 ( 0.3%)     | 5 ( 0.2%)     |
| Vaginal haemorrhage                      | 48 ( 3.4%)    | 48 ( 3.3%)    | 96 ( 3.3%)    |
| Vaginal odour                            | 0             | 1 ( <0.1%)    | 1 ( <0.1%)    |
| Vulvovaginal dryness                     | 1 ( <0.1%)    | 2 ( 0.1%)     | 3 ( 0.1%)     |
| Vulvovaginal pain                        | 1 ( <0.1%)    | 0             | 1 ( <0.1%)    |

**Table 14.3.1 / 12: Number of subjects with adverse events causing discontinuation of study drug by primary system organ class and preferred term (FAS)**

| Primary system organ class             | LCS12         | LCS16         | Total         |
|----------------------------------------|---------------|---------------|---------------|
| Preferred term                         | N=1432 (100%) | N=1452 (100%) | N=2884 (100%) |
| MedDRA version 14.0                    |               |               |               |
| Skin and subcutaneous tissue disorders | 47 ( 3.3%)    | 33 ( 2.3%)    | 80 ( 2.8%)    |
| Acne                                   | 39 ( 2.7%)    | 25 ( 1.7%)    | 64 ( 2.2%)    |
| Acne cystic                            | 1 ( <0.1%)    | 0             | 1 ( <0.1%)    |
| Alopecia                               | 4 ( 0.3%)     | 3 ( 0.2%)     | 7 ( 0.2%)     |
| Hirsutism                              | 2 ( 0.1%)     | 2 ( 0.1%)     | 4 ( 0.1%)     |
| Hyperhidrosis                          | 1 ( <0.1%)    | 0             | 1 ( <0.1%)    |
| Hypertrichosis                         | 1 ( <0.1%)    | 0             | 1 ( <0.1%)    |
| Psoriasis                              | 0             | 1 ( <0.1%)    | 1 ( <0.1%)    |
| Seborrhoea                             | 3 ( 0.2%)     | 2 ( 0.1%)     | 5 ( 0.2%)     |
| Skin irritation                        | 0             | 1 ( <0.1%)    | 1 ( <0.1%)    |
| Skin odour abnormal                    | 0             | 1 ( <0.1%)    | 1 ( <0.1%)    |
| Urticaria                              | 1 ( <0.1%)    | 0             | 1 ( <0.1%)    |
| Vascular disorders                     | 1 ( <0.1%)    | 1 ( <0.1%)    | 2 ( <0.1%)    |
| Deep vein thrombosis                   | 1 ( <0.1%)    | 0             | 1 ( <0.1%)    |
| Hypertension                           | 0             | 1 ( <0.1%)    | 1 ( <0.1%)    |

Note: A subject is counted only once within each preferred term of any primary SOC.

Note: Adverse events are sorted in alphabetical order by primary SOC and preferred term.

Global Biostatistics: /by-sasp/patdb/projects/de04209/310442/stat/prod\_interim03/pgms/t-ae.sas epkll 12OCT2011 11:24

End of table

**Table 14.3.1 / 13: Number of subjects with study drug-related adverse events causing discontinuation of study drug by primary system organ class and preferred term (FAS)**

| Primary system organ class<br>Preferred term<br>MedDRA version 14.0 | LCS12<br>N=1432 (100%) | LCS16<br>N=1452 (100%) | Total<br>N=2884 (100%) |
|---------------------------------------------------------------------|------------------------|------------------------|------------------------|
| Number of subjects (%) with at least one such adverse event         | 249 ( 17.4%)           | 232 ( 16.0%)           | 481 ( 16.7%)           |
| Blood and lymphatic system disorders                                | 1 ( <0.1%)             | 0                      | 1 ( <0.1%)             |
| Lymphadenitis                                                       | 1 ( <0.1%)             | 0                      | 1 ( <0.1%)             |
| Ear and labyrinth disorders                                         | 0                      | 1 ( <0.1%)             | 1 ( <0.1%)             |
| Vertigo                                                             | 0                      | 1 ( <0.1%)             | 1 ( <0.1%)             |
| Eye disorders                                                       | 0                      | 1 ( <0.1%)             | 1 ( <0.1%)             |
| Blepharitis                                                         | 0                      | 1 ( <0.1%)             | 1 ( <0.1%)             |
| Chalazion                                                           | 0                      | 1 ( <0.1%)             | 1 ( <0.1%)             |
| Gastrointestinal disorders                                          | 37 ( 2.6%)             | 23 ( 1.6%)             | 60 ( 2.1%)             |
| Abdominal distension                                                | 7 ( 0.5%)              | 2 ( 0.1%)              | 9 ( 0.3%)              |
| Abdominal pain                                                      | 15 ( 1.0%)             | 10 ( 0.7%)             | 25 ( 0.9%)             |
| Abdominal pain lower                                                | 11 ( 0.8%)             | 8 ( 0.6%)              | 19 ( 0.7%)             |
| Constipation                                                        | 1 ( <0.1%)             | 0                      | 1 ( <0.1%)             |
| Frequent bowel movements                                            | 1 ( <0.1%)             | 0                      | 1 ( <0.1%)             |
| Nausea                                                              | 6 ( 0.4%)              | 3 ( 0.2%)              | 9 ( 0.3%)              |
| General disorders and administration site conditions                | 26 ( 1.8%)             | 31 ( 2.1%)             | 57 ( 2.0%)             |
| Device dislocation                                                  | 2 ( 0.1%)              | 4 ( 0.3%)              | 6 ( 0.2%)              |
| Device expulsion                                                    | 21 ( 1.5%)             | 25 ( 1.7%)             | 46 ( 1.6%)             |
| Fatigue                                                             | 2 ( 0.1%)              | 1 ( <0.1%)             | 3 ( 0.1%)              |
| Irritability                                                        | 1 ( <0.1%)             | 0                      | 1 ( <0.1%)             |
| Oedema                                                              | 0                      | 1 ( <0.1%)             | 1 ( <0.1%)             |



**Table 14.3.1 / 13: Number of subjects with study drug-related adverse events causing discontinuation of study drug by primary system organ class and preferred term (FAS)**

| Primary system organ class<br>Preferred term<br>MedDRA version 14.0        | LCS12<br>N=1432 (100%) | LCS16<br>N=1452 (100%) | Total<br>N=2884 (100%) |
|----------------------------------------------------------------------------|------------------------|------------------------|------------------------|
| <b>Infections and infestations</b>                                         | 11 ( 0.8%)             | 16 ( 1.1%)             | 27 ( 0.9%)             |
| Cervicitis                                                                 | 0                      | 1 ( <0.1%)             | 1 ( <0.1%)             |
| Endometritis                                                               | 1 ( <0.1%)             | 2 ( 0.1%)              | 3 ( 0.1%)              |
| Pelvic inflammatory disease                                                | 4 ( 0.3%)              | 5 ( 0.3%)              | 9 ( 0.3%)              |
| Pyelonephritis                                                             | 1 ( <0.1%)             | 0                      | 1 ( <0.1%)             |
| Salpingo-oophoritis                                                        | 0                      | 1 ( <0.1%)             | 1 ( <0.1%)             |
| Tonsillitis                                                                | 1 ( <0.1%)             | 0                      | 1 ( <0.1%)             |
| Tubo-ovarian abscess                                                       | 1 ( <0.1%)             | 0                      | 1 ( <0.1%)             |
| Urinary tract infection                                                    | 0                      | 1 ( <0.1%)             | 1 ( <0.1%)             |
| Uterine infection                                                          | 0                      | 1 ( <0.1%)             | 1 ( <0.1%)             |
| Vaginal infection                                                          | 3 ( 0.2%)              | 1 ( <0.1%)             | 4 ( 0.1%)              |
| Vaginitis bacterial                                                        | 1 ( <0.1%)             | 2 ( 0.1%)              | 3 ( 0.1%)              |
| Vulvovaginal mycotic infection                                             | 0                      | 2 ( 0.1%)              | 2 ( <0.1%)             |
| Vulvovaginitis                                                             | 0                      | 1 ( <0.1%)             | 1 ( <0.1%)             |
| <b>Injury, poisoning and procedural complications</b>                      | 1 ( <0.1%)             | 0                      | 1 ( <0.1%)             |
| Procedural pain                                                            | 1 ( <0.1%)             | 0                      | 1 ( <0.1%)             |
| <b>Investigations</b>                                                      | 9 ( 0.6%)              | 10 ( 0.7%)             | 19 ( 0.7%)             |
| Alanine aminotransferase increased                                         | 1 ( <0.1%)             | 0                      | 1 ( <0.1%)             |
| Aspartate aminotransferase increased                                       | 1 ( <0.1%)             | 0                      | 1 ( <0.1%)             |
| Weight increased                                                           | 8 ( 0.6%)              | 10 ( 0.7%)             | 18 ( 0.6%)             |
| <b>Metabolism and nutrition disorders</b>                                  | 0                      | 1 ( <0.1%)             | 1 ( <0.1%)             |
| Fluid retention                                                            | 0                      | 1 ( <0.1%)             | 1 ( <0.1%)             |
| <b>Musculoskeletal and connective tissue disorders</b>                     | 1 ( <0.1%)             | 0                      | 1 ( <0.1%)             |
| Back pain                                                                  | 1 ( <0.1%)             | 0                      | 1 ( <0.1%)             |
| <b>Neoplasms benign, malignant and unspecified (incl cysts and polyps)</b> | 0                      | 1 ( <0.1%)             | 1 ( <0.1%)             |
| Uterine leiomyoma                                                          | 0                      | 1 ( <0.1%)             | 1 ( <0.1%)             |
| <b>Nervous system disorders</b>                                            | 6 ( 0.4%)              | 5 ( 0.3%)              | 11 ( 0.4%)             |
| Dizziness                                                                  | 1 ( <0.1%)             | 0                      | 1 ( <0.1%)             |
| Headache                                                                   | 4 ( 0.3%)              | 5 ( 0.3%)              | 9 ( 0.3%)              |
| Migraine                                                                   | 1 ( <0.1%)             | 0                      | 1 ( <0.1%)             |

**Table 14.3.1 / 13: Number of subjects with study drug-related adverse events causing discontinuation of study drug by primary system organ class and preferred term (FAS)**

| Primary system organ class                     | LCS12         | LCS16         | Total         |
|------------------------------------------------|---------------|---------------|---------------|
| Preferred term                                 | N=1432 (100%) | N=1452 (100%) | N=2884 (100%) |
| MedDRA version 14.0                            |               |               |               |
| Pregnancy, puerperium and perinatal conditions | 3 ( 0.2%)     | 8 ( 0.6%)     | 11 ( 0.4%)    |
| Abortion spontaneous                           | 1 ( <0.1%)    | 0             | 1 ( <0.1%)    |
| Abortion spontaneous incomplete                | 0             | 1 ( <0.1%)    | 1 ( <0.1%)    |
| Ectopic pregnancy                              | 2 ( 0.1%)     | 6 ( 0.4%)     | 8 ( 0.3%)     |
| Premature separation of placenta               | 1 ( <0.1%)    | 0             | 1 ( <0.1%)    |
| Ruptured ectopic pregnancy                     | 0             | 1 ( <0.1%)    | 1 ( <0.1%)    |
| Psychiatric disorders                          | 24 ( 1.7%)    | 16 ( 1.1%)    | 40 ( 1.4%)    |
| Affect lability                                | 0             | 1 ( <0.1%)    | 1 ( <0.1%)    |
| Anxiety                                        | 4 ( 0.3%)     | 0             | 4 ( 0.1%)     |
| Depressed mood                                 | 1 ( <0.1%)    | 1 ( <0.1%)    | 2 ( <0.1%)    |
| Depression                                     | 4 ( 0.3%)     | 2 ( 0.1%)     | 6 ( 0.2%)     |
| Insomnia                                       | 0             | 1 ( <0.1%)    | 1 ( <0.1%)    |
| Libido decreased                               | 8 ( 0.6%)     | 7 ( 0.5%)     | 15 ( 0.5%)    |
| Mood altered                                   | 7 ( 0.5%)     | 4 ( 0.3%)     | 11 ( 0.4%)    |
| Mood swings                                    | 5 ( 0.3%)     | 4 ( 0.3%)     | 9 ( 0.3%)     |
| Nervousness                                    | 0             | 1 ( <0.1%)    | 1 ( <0.1%)    |
| Panic attack                                   | 0             | 1 ( <0.1%)    | 1 ( <0.1%)    |

**Table 14.3.1 / 13: Number of subjects with study drug-related adverse events causing discontinuation of study drug by primary system organ class and preferred term (FAS)**

| Primary system organ class<br>Preferred term<br>MedDRA version 14.0 | LCS12<br>N=1432 (100%) | LCS16<br>N=1452 (100%) | Total<br>N=2884 (100%) |
|---------------------------------------------------------------------|------------------------|------------------------|------------------------|
| Reproductive system and breast disorders                            | 126 ( 8.8%)            | 127 ( 8.7%)            | 253 ( 8.8%)            |
| Adnexa uteri pain                                                   | 0                      | 1 (<0.1%)              | 1 (<0.1%)              |
| Amenorrhoea                                                         | 0                      | 1 (<0.1%)              | 1 (<0.1%)              |
| Atrophic vulvovaginitis                                             | 1 (<0.1%)              | 0                      | 1 (<0.1%)              |
| Breast discomfort                                                   | 1 (<0.1%)              | 1 (<0.1%)              | 2 (<0.1%)              |
| Breast pain                                                         | 5 ( 0.3%)              | 1 (<0.1%)              | 6 ( 0.2%)              |
| Coital bleeding                                                     | 3 ( 0.2%)              | 0                      | 3 ( 0.1%)              |
| Dysfunctional uterine bleeding                                      | 1 (<0.1%)              | 2 ( 0.1%)              | 3 ( 0.1%)              |
| Dysmenorrhoea                                                       | 17 ( 1.2%)             | 12 ( 0.8%)             | 29 ( 1.0%)             |
| Dyspareunia                                                         | 7 ( 0.5%)              | 3 ( 0.2%)              | 10 ( 0.3%)             |
| Ectropion of cervix                                                 | 1 (<0.1%)              | 1 (<0.1%)              | 2 (<0.1%)              |
| Endometriosis                                                       | 0                      | 1 (<0.1%)              | 1 (<0.1%)              |
| Genital discharge                                                   | 0                      | 1 (<0.1%)              | 1 (<0.1%)              |
| Haemorrhagic ovarian cyst                                           | 1 (<0.1%)              | 0                      | 1 (<0.1%)              |
| Menometrorrhagia                                                    | 1 (<0.1%)              | 0                      | 1 (<0.1%)              |
| Menorrhagia                                                         | 2 ( 0.1%)              | 6 ( 0.4%)              | 8 ( 0.3%)              |
| Menstrual disorder                                                  | 1 (<0.1%)              | 0                      | 1 (<0.1%)              |
| Menstruation irregular                                              | 1 (<0.1%)              | 2 ( 0.1%)              | 3 ( 0.1%)              |
| Metrorrhagia                                                        | 5 ( 0.3%)              | 4 ( 0.3%)              | 9 ( 0.3%)              |
| Oligomenorrhoea                                                     | 0                      | 2 ( 0.1%)              | 2 (<0.1%)              |
| Ovarian cyst                                                        | 2 ( 0.1%)              | 2 ( 0.1%)              | 4 ( 0.1%)              |
| Ovulation pain                                                      | 1 (<0.1%)              | 0                      | 1 (<0.1%)              |
| Pelvic discomfort                                                   | 0                      | 1 (<0.1%)              | 1 (<0.1%)              |
| Pelvic pain                                                         | 25 ( 1.7%)             | 34 ( 2.3%)             | 59 ( 2.0%)             |
| Polymenorrhoea                                                      | 0                      | 1 (<0.1%)              | 1 (<0.1%)              |
| Premenstrual syndrome                                               | 0                      | 2 ( 0.1%)              | 2 (<0.1%)              |
| Uterine haemorrhage                                                 | 5 ( 0.3%)              | 2 ( 0.1%)              | 7 ( 0.2%)              |
| Uterine inflammation                                                | 0                      | 1 (<0.1%)              | 1 (<0.1%)              |
| Uterine spasm                                                       | 9 ( 0.6%)              | 8 ( 0.6%)              | 17 ( 0.6%)             |
| Uterine tenderness                                                  | 1 (<0.1%)              | 0                      | 1 (<0.1%)              |
| Vaginal discharge                                                   | 1 (<0.1%)              | 2 ( 0.1%)              | 3 ( 0.1%)              |
| Vaginal haemorrhage                                                 | 47 ( 3.3%)             | 46 ( 3.2%)             | 93 ( 3.2%)             |
| Vaginal odour                                                       | 0                      | 1 (<0.1%)              | 1 (<0.1%)              |
| Vulvovaginal dryness                                                | 1 (<0.1%)              | 2 ( 0.1%)              | 3 ( 0.1%)              |
| Vulvovaginal pain                                                   | 1 (<0.1%)              | 0                      | 1 (<0.1%)              |

**Table 14.3.1 / 13: Number of subjects with study drug-related adverse events causing discontinuation of study drug by primary system organ class and preferred term (FAS)**

| Primary system organ class             | LCS12         | LCS16         | Total         |
|----------------------------------------|---------------|---------------|---------------|
| Preferred term                         | N=1432 (100%) | N=1452 (100%) | N=2884 (100%) |
| MedDRA version 14.0                    |               |               |               |
| Skin and subcutaneous tissue disorders | 46 ( 3.2%)    | 29 ( 2.0%)    | 75 ( 2.6%)    |
| Acne                                   | 39 ( 2.7%)    | 23 ( 1.6%)    | 62 ( 2.1%)    |
| Alopecia                               | 4 ( 0.3%)     | 1 (<0.1%)     | 5 ( 0.2%)     |
| Hirsutism                              | 2 ( 0.1%)     | 2 ( 0.1%)     | 4 ( 0.1%)     |
| Hyperhidrosis                          | 1 (<0.1%)     | 0             | 1 (<0.1%)     |
| Hypertrichosis                         | 1 (<0.1%)     | 0             | 1 (<0.1%)     |
| Psoriasis                              | 0             | 1 (<0.1%)     | 1 (<0.1%)     |
| Seborrhoea                             | 3 ( 0.2%)     | 2 ( 0.1%)     | 5 ( 0.2%)     |
| Skin irritation                        | 0             | 1 (<0.1%)     | 1 (<0.1%)     |
| Skin odour abnormal                    | 0             | 1 (<0.1%)     | 1 (<0.1%)     |
| Urticaria                              | 1 (<0.1%)     | 0             | 1 (<0.1%)     |
| Vascular disorders                     | 0             | 1 (<0.1%)     | 1 (<0.1%)     |
| Hypertension                           | 0             | 1 (<0.1%)     | 1 (<0.1%)     |

Note: A subject is counted only once within each preferred term of any primary SOC.

Note: Adverse events are sorted in alphabetical order by primary SOC and preferred term.

Note: Missing, possible, probable and definite for drug relationship is counted as drug-related.

Global Biostatistics: /by-sasp/patdb/projects/de04209/310442/stat/prod\_interim03/pgms/t-ae.sas epkll 12OCT2011 11:24

End of table

**Table 14.3.1 / 14: Number of subjects with adverse events by outcome, primary system organ class and preferred term (FAS)**

| Primary system organ class<br>Preferred term<br>MedDRA version 14.0 | Maximum Derived AE outcome             | LCS12<br>N=1432 (100%) | LCS16<br>N=1452 (100%) | Total<br>N=2884 (100%) |
|---------------------------------------------------------------------|----------------------------------------|------------------------|------------------------|------------------------|
| Number of subjects (%) with at least one AE                         | recovered/resolved                     | 595 ( 41.6%)           | 641 ( 44.1%)           | 1236 ( 42.9%)          |
|                                                                     | recovering/resolving                   | 42 ( 2.9%)             | 46 ( 3.2%)             | 88 ( 3.1%)             |
|                                                                     | not recovered/not resolved             | 523 ( 36.5%)           | 529 ( 36.4%)           | 1052 ( 36.5%)          |
|                                                                     | recovered/resolved with resid. effects | 11 ( 0.8%)             | 7 ( 0.5%)              | 18 ( 0.6%)             |
|                                                                     | fatal                                  | 0                      | 1 ( <0.1%)             | 1 ( <0.1%)             |
| Blood and lymphatic system disorders                                | recovered/resolved                     | 10 ( 0.7%)             | 4 ( 0.3%)              | 14 ( 0.5%)             |
|                                                                     | recovering/resolving                   | 1 ( <0.1%)             | 0                      | 1 ( <0.1%)             |
|                                                                     | not recovered/not resolved             | 4 ( 0.3%)              | 4 ( 0.3%)              | 8 ( 0.3%)              |
| Anaemia                                                             | recovered/resolved                     | 4 ( 0.3%)              | 1 ( <0.1%)             | 5 ( 0.2%)              |
|                                                                     | not recovered/not resolved             | 2 ( 0.1%)              | 2 ( 0.1%)              | 4 ( 0.1%)              |
| Iron deficiency anaemia                                             | recovered/resolved                     | 1 ( <0.1%)             | 1 ( <0.1%)             | 2 ( <0.1%)             |
| Leukocytosis                                                        | recovered/resolved                     | 1 ( <0.1%)             | 0                      | 1 ( <0.1%)             |
| Lymphadenitis                                                       | recovered/resolved                     | 1 ( <0.1%)             | 0                      | 1 ( <0.1%)             |
|                                                                     | recovering/resolving                   | 1 ( <0.1%)             | 0                      | 1 ( <0.1%)             |
|                                                                     | not recovered/not resolved             | 1 ( <0.1%)             | 0                      | 1 ( <0.1%)             |
| Lymphadenopathy                                                     | recovered/resolved                     | 3 ( 0.2%)              | 1 ( <0.1%)             | 4 ( 0.1%)              |
|                                                                     | not recovered/not resolved             | 0                      | 2 ( 0.1%)              | 2 ( <0.1%)             |
| Pancytopenia                                                        | recovered/resolved                     | 0                      | 1 ( <0.1%)             | 1 ( <0.1%)             |
| Spherocytic anaemia                                                 | recovered/resolved                     | 1 ( <0.1%)             | 0                      | 1 ( <0.1%)             |
| Splenic cyst                                                        | not recovered/not resolved             | 1 ( <0.1%)             | 0                      | 1 ( <0.1%)             |
| Splenomegaly                                                        | recovered/resolved                     | 1 ( <0.1%)             | 0                      | 1 ( <0.1%)             |
| Cardiac disorders                                                   | recovered/resolved                     | 7 ( 0.5%)              | 9 ( 0.6%)              | 16 ( 0.6%)             |
|                                                                     | not recovered/not resolved             | 2 ( 0.1%)              | 5 ( 0.3%)              | 7 ( 0.2%)              |
| Arrhythmia                                                          | recovered/resolved                     | 1 ( <0.1%)             | 1 ( <0.1%)             | 2 ( <0.1%)             |
|                                                                     | not recovered/not resolved             | 0                      | 1 ( <0.1%)             | 1 ( <0.1%)             |

**Table 14.3.1 / 14: Number of subjects with adverse events by outcome, primary system organ class and preferred term (FAS)**

| Primary system organ class              | Preferred term                             | Maximum Derived AE outcome | LCS12<br>N=1432 (100%) | LCS16<br>N=1452 (100%) | Total<br>N=2884 (100%) |
|-----------------------------------------|--------------------------------------------|----------------------------|------------------------|------------------------|------------------------|
| MedDRA version 14.0                     | Extrasystoles                              | recovered/resolved         | 0                      | 2 ( 0.1%)              | 2 ( <0.1%)             |
|                                         | Mitral valve prolapse                      | not recovered/not resolved | 0                      | 2 ( 0.1%)              | 2 ( <0.1%)             |
|                                         | Palpitations                               | recovered/resolved         | 4 ( 0.3%)              | 3 ( 0.2%)              | 7 ( 0.2%)              |
|                                         |                                            | not recovered/not resolved | 0                      | 3 ( 0.2%)              | 3 ( 0.1%)              |
|                                         | Sinus tachycardia                          | recovered/resolved         | 0                      | 1 ( <0.1%)             | 1 ( <0.1%)             |
|                                         | Tachycardia                                | recovered/resolved         | 2 ( 0.1%)              | 2 ( 0.1%)              | 4 ( 0.1%)              |
|                                         |                                            | not recovered/not resolved | 2 ( 0.1%)              | 0                      | 2 ( <0.1%)             |
|                                         | Ventricular extrasystoles                  | recovered/resolved         | 0                      | 1 ( <0.1%)             | 1 ( <0.1%)             |
|                                         | Congenital, familial and genetic disorders | recovered/resolved         | 1 ( <0.1%)             | 0                      | 1 ( <0.1%)             |
|                                         |                                            | not recovered/not resolved | 2 ( 0.1%)              | 1 ( <0.1%)             | 3 ( 0.1%)              |
| Congenital hydronephrosis               | not recovered/not resolved                 | 1 ( <0.1%)                 | 0                      | 1 ( <0.1%)             |                        |
| Dermoid cyst                            | not recovered/not resolved                 | 1 ( <0.1%)                 | 0                      | 1 ( <0.1%)             |                        |
| Myotonia congenita                      | not recovered/not resolved                 | 0                          | 1 ( <0.1%)             | 1 ( <0.1%)             |                        |
| Urethral intrinsic sphincter deficiency | recovered/resolved                         | 1 ( <0.1%)                 | 0                      | 1 ( <0.1%)             |                        |
| Ear and labyrinth disorders             | recovered/resolved                         | not recovered/not resolved | 12 ( 0.8%)             | 12 ( 0.8%)             | 24 ( 0.8%)             |
|                                         |                                            | not recovered/not resolved | 4 ( 0.3%)              | 2 ( 0.1%)              | 6 ( 0.2%)              |
|                                         | Deafness bilateral                         | recovered/resolved         | 1 ( <0.1%)             | 0                      | 1 ( <0.1%)             |
|                                         | Ear pain                                   | recovered/resolved         | 0                      | 3 ( 0.2%)              | 3 ( 0.1%)              |
|                                         | Ear pruritus                               | recovered/resolved         | 1 ( <0.1%)             | 0                      | 1 ( <0.1%)             |
|                                         | Meniere's disease                          | not recovered/not resolved | 0                      | 1 ( <0.1%)             | 1 ( <0.1%)             |
| Middle ear effusion                     | recovered/resolved                         | 0                          | 2 ( 0.1%)              | 2 ( <0.1%)             |                        |

**Table 14.3.1 / 14: Number of subjects with adverse events by outcome, primary system organ class and preferred term (FAS)**

| Primary system organ class | Preferred term                | Maximum Derived AE outcome | LCS12<br>N=1432 (100%) | LCS16<br>N=1452 (100%) | Total<br>N=2884 (100%) |
|----------------------------|-------------------------------|----------------------------|------------------------|------------------------|------------------------|
| MedDRA version 14.0        | Motion sickness               | recovered/resolved         | 3 ( 0.2%)              | 3 ( 0.2%)              | 6 ( 0.2%)              |
|                            |                               | not recovered/not resolved | 1 ( <0.1%)             | 0                      | 1 ( <0.1%)             |
|                            | Otorrhoea                     | recovered/resolved         | 1 ( <0.1%)             | 1 ( <0.1%)             | 2 ( <0.1%)             |
|                            | Sudden hearing loss           | recovered/resolved         | 1 ( <0.1%)             | 0                      | 1 ( <0.1%)             |
|                            | Tinnitus                      | not recovered/not resolved | 2 ( 0.1%)              | 0                      | 2 ( <0.1%)             |
|                            | Tympanic membrane perforation | recovered/resolved         | 2 ( 0.1%)              | 0                      | 2 ( <0.1%)             |
|                            | Vertigo                       | recovered/resolved         | 3 ( 0.2%)              | 5 ( 0.3%)              | 8 ( 0.3%)              |
|                            |                               | not recovered/not resolved | 1 ( <0.1%)             | 1 ( <0.1%)             | 2 ( <0.1%)             |
|                            | Vertigo labyrinthine          | recovered/resolved         | 1 ( <0.1%)             | 0                      | 1 ( <0.1%)             |
|                            | Vertigo positional            | recovered/resolved         | 2 ( 0.1%)              | 0                      | 2 ( <0.1%)             |
| Endocrine disorders        | Goitre                        | recovered/resolved         | 1 ( <0.1%)             | 1 ( <0.1%)             | 2 ( <0.1%)             |
|                            |                               | recovering/resolving       | 1 ( <0.1%)             | 2 ( 0.1%)              | 3 ( 0.1%)              |
|                            |                               | not recovered/not resolved | 7 ( 0.5%)              | 18 ( 1.2%)             | 25 ( 0.9%)             |
|                            | Hyperthyroidism               | recovered/resolved         | 1 ( <0.1%)             | 1 ( <0.1%)             | 2 ( <0.1%)             |
|                            |                               | recovering/resolving       | 0                      | 1 ( <0.1%)             | 1 ( <0.1%)             |
|                            |                               | not recovered/not resolved | 1 ( <0.1%)             | 3 ( 0.2%)              | 4 ( 0.1%)              |
|                            | Hypothyroidism                | not recovered/not resolved | 0                      | 2 ( 0.1%)              | 2 ( <0.1%)             |
|                            | Thyroid mass                  | recovering/resolving       | 1 ( <0.1%)             | 1 ( <0.1%)             | 2 ( <0.1%)             |
|                            |                               | not recovered/not resolved | 5 ( 0.3%)              | 12 ( 0.8%)             | 17 ( 0.6%)             |
|                            | Thyroiditis                   | not recovered/not resolved | 0                      | 1 ( <0.1%)             | 1 ( <0.1%)             |
| Eye disorders              | Thyroiditis                   | not recovered/not resolved | 1 ( <0.1%)             | 0                      | 1 ( <0.1%)             |
|                            |                               | recovered/resolved         | 24 ( 1.7%)             | 21 ( 1.4%)             | 45 ( 1.6%)             |
|                            |                               | not recovered/not resolved | 1 ( <0.1%)             | 2 ( 0.1%)              | 3 ( 0.1%)              |

**Table 14.3.1 / 14: Number of subjects with adverse events by outcome, primary system organ class and preferred term (FAS)**

| Primary system organ class | Preferred term          | Maximum Derived AE outcome | LCS12<br>N=1432 (100%) | LCS16<br>N=1452 (100%) | Total<br>N=2884 (100%) |
|----------------------------|-------------------------|----------------------------|------------------------|------------------------|------------------------|
| MedDRA version 14.0        |                         | recovered/resolved         | 1 ( <0.1%)             | 1 ( <0.1%)             | 2 ( <0.1%)             |
|                            |                         | not recovered/not resolved | 0                      | 1 ( <0.1%)             | 1 ( <0.1%)             |
|                            | Blepharitis             |                            |                        |                        |                        |
|                            | Chalazion               | not recovered/not resolved | 0                      | 1 ( <0.1%)             | 1 ( <0.1%)             |
|                            | Conjunctivitis          | recovered/resolved         | 15 ( 1.0%)             | 15 ( 1.0%)             | 30 ( 1.0%)             |
|                            | Conjunctivitis allergic | recovered/resolved         | 2 ( 0.1%)              | 2 ( 0.1%)              | 4 ( 0.1%)              |
|                            | Dry eye                 | recovered/resolved         | 1 ( <0.1%)             | 0                      | 1 ( <0.1%)             |
|                            |                         | not recovered/not resolved | 1 ( <0.1%)             | 0                      | 1 ( <0.1%)             |
|                            | Eye inflammation        | recovered/resolved         | 0                      | 1 ( <0.1%)             | 1 ( <0.1%)             |
|                            | Eyelid cyst             | not recovered/not resolved | 0                      | 1 ( <0.1%)             | 1 ( <0.1%)             |
|                            | Heterophoria            | recovered/resolved         | 1 ( <0.1%)             | 0                      | 1 ( <0.1%)             |
|                            | Iridocyclitis           | recovered/resolved         | 1 ( <0.1%)             | 0                      | 1 ( <0.1%)             |
|                            | Iritis                  | recovered/resolved         | 0                      | 2 ( 0.1%)              | 2 ( <0.1%)             |
|                            | Meibomianitis           | recovered/resolved         | 1 ( <0.1%)             | 0                      | 1 ( <0.1%)             |
|                            | Myopia                  | recovered/resolved         | 0                      | 1 ( <0.1%)             | 1 ( <0.1%)             |
|                            | Ocular icterus          | recovered/resolved         | 0                      | 1 ( <0.1%)             | 1 ( <0.1%)             |
|                            | Panophthalmitis         | recovered/resolved         | 1 ( <0.1%)             | 0                      | 1 ( <0.1%)             |
|                            | Scotoma                 | recovered/resolved         | 1 ( <0.1%)             | 0                      | 1 ( <0.1%)             |
|                            | Vision blurred          | recovered/resolved         | 1 ( <0.1%)             | 0                      | 1 ( <0.1%)             |
| Gastrointestinal disorders |                         | recovered/resolved         | 235 ( 16.4%)           | 256 ( 17.6%)           | 491 ( 17.0%)           |
|                            |                         | recovering/resolving       | 14 ( 1.0%)             | 9 ( 0.6%)              | 23 ( 0.8%)             |
|                            |                         | not recovered/not resolved | 76 ( 5.3%)             | 49 ( 3.4%)             | 125 ( 4.3%)            |



**Table 14.3.1 / 14: Number of subjects with adverse events by outcome, primary system organ class and preferred term (FAS)**

| Primary system organ class<br>Preferred term<br>MedDRA version 14.0 | Maximum Derived AE outcome | LCS12<br>N=1432 (100%) | LCS16<br>N=1452 (100%) | Total<br>N=2884 (100%) |
|---------------------------------------------------------------------|----------------------------|------------------------|------------------------|------------------------|
| Abdominal adhesions                                                 | recovered/resolved         | 1 ( <0.1%)             | 0                      | 1 ( <0.1%)             |
| Abdominal discomfort                                                | recovered/resolved         | 5 ( 0.3%)              | 5 ( 0.3%)              | 10 ( 0.3%)             |
| Abdominal distension                                                | recovered/resolved         | 8 ( 0.6%)              | 7 ( 0.5%)              | 15 ( 0.5%)             |
|                                                                     | recovering/resolving       | 2 ( 0.1%)              | 0                      | 2 ( <0.1%)             |
|                                                                     | not recovered/not resolved | 8 ( 0.6%)              | 4 ( 0.3%)              | 12 ( 0.4%)             |
| Abdominal hernia                                                    | recovered/resolved         | 2 ( 0.1%)              | 0                      | 2 ( <0.1%)             |
| Abdominal mass                                                      | recovered/resolved         | 1 ( <0.1%)             | 0                      | 1 ( <0.1%)             |
| Abdominal pain                                                      | recovered/resolved         | 74 ( 5.2%)             | 84 ( 5.8%)             | 158 ( 5.5%)            |
|                                                                     | recovering/resolving       | 4 ( 0.3%)              | 6 ( 0.4%)              | 10 ( 0.3%)             |
|                                                                     | not recovered/not resolved | 19 ( 1.3%)             | 11 ( 0.8%)             | 30 ( 1.0%)             |
| Abdominal pain lower                                                | recovered/resolved         | 47 ( 3.3%)             | 50 ( 3.4%)             | 97 ( 3.4%)             |
|                                                                     | recovering/resolving       | 2 ( 0.1%)              | 0                      | 2 ( <0.1%)             |
|                                                                     | not recovered/not resolved | 16 ( 1.1%)             | 11 ( 0.8%)             | 27 ( 0.9%)             |
| Abdominal pain upper                                                | recovered/resolved         | 6 ( 0.4%)              | 11 ( 0.8%)             | 17 ( 0.6%)             |
|                                                                     | not recovered/not resolved | 1 ( <0.1%)             | 0                      | 1 ( <0.1%)             |
| Abdominal tenderness                                                | recovered/resolved         | 1 ( <0.1%)             | 0                      | 1 ( <0.1%)             |
|                                                                     | recovering/resolving       | 1 ( <0.1%)             | 0                      | 1 ( <0.1%)             |
| Anal fissure                                                        | recovered/resolved         | 1 ( <0.1%)             | 2 ( 0.1%)              | 3 ( 0.1%)              |
| Anal pruritus                                                       | recovered/resolved         | 3 ( 0.2%)              | 2 ( 0.1%)              | 5 ( 0.2%)              |
| Anal skin tags                                                      | recovered/resolved         | 0                      | 1 ( <0.1%)             | 1 ( <0.1%)             |
| Aphthous stomatitis                                                 | not recovered/not resolved | 0                      | 1 ( <0.1%)             | 1 ( <0.1%)             |
| Breath odour                                                        | recovered/resolved         | 1 ( <0.1%)             | 0                      | 1 ( <0.1%)             |
| Coeliac disease                                                     | not recovered/not resolved | 1 ( <0.1%)             | 0                      | 1 ( <0.1%)             |

**Table 14.3.1 / 14: Number of subjects with adverse events by outcome, primary system organ class and preferred term (FAS)**

| Primary system organ class<br>Preferred term<br>MedDRA version 14.0 | Maximum Derived AE outcome | LCS12<br>N=1432 (100%) | LCS16<br>N=1452 (100%) | Total<br>N=2884 (100%) |
|---------------------------------------------------------------------|----------------------------|------------------------|------------------------|------------------------|
| Colitis                                                             | recovered/resolved         | 1 ( <0.1%)             | 3 ( 0.2%)              | 4 ( 0.1%)              |
| Colitis ulcerative                                                  | not recovered/not resolved | 2 ( 0.1%)              | 0                      | 2 ( <0.1%)             |
| Colonic polyp                                                       | recovered/resolved         | 1 ( <0.1%)             | 0                      | 1 ( <0.1%)             |
| Constipation                                                        | recovered/resolved         | 8 ( 0.6%)              | 11 ( 0.8%)             | 19 ( 0.7%)             |
|                                                                     | recovering/resolving       | 4 ( 0.3%)              | 2 ( 0.1%)              | 6 ( 0.2%)              |
|                                                                     | not recovered/not resolved | 4 ( 0.3%)              | 4 ( 0.3%)              | 8 ( 0.3%)              |
| Crohn's disease                                                     | recovering/resolving       | 1 ( <0.1%)             | 0                      | 1 ( <0.1%)             |
|                                                                     | not recovered/not resolved | 1 ( <0.1%)             | 0                      | 1 ( <0.1%)             |
| Dental caries                                                       | recovered/resolved         | 1 ( <0.1%)             | 3 ( 0.2%)              | 4 ( 0.1%)              |
| Diarrhoea                                                           | recovered/resolved         | 16 ( 1.1%)             | 24 ( 1.7%)             | 40 ( 1.4%)             |
|                                                                     | not recovered/not resolved | 2 ( 0.1%)              | 2 ( 0.1%)              | 4 ( 0.1%)              |
| Dry mouth                                                           | recovered/resolved         | 0                      | 1 ( <0.1%)             | 1 ( <0.1%)             |
| Duodenal ulcer                                                      | recovered/resolved         | 1 ( <0.1%)             | 0                      | 1 ( <0.1%)             |
| Dyspepsia                                                           | recovered/resolved         | 8 ( 0.6%)              | 8 ( 0.6%)              | 16 ( 0.6%)             |
|                                                                     | recovering/resolving       | 1 ( <0.1%)             | 0                      | 1 ( <0.1%)             |
|                                                                     | not recovered/not resolved | 5 ( 0.3%)              | 4 ( 0.3%)              | 9 ( 0.3%)              |
| Dysphagia                                                           | recovered/resolved         | 1 ( <0.1%)             | 1 ( <0.1%)             | 2 ( <0.1%)             |
| Flatulence                                                          | recovered/resolved         | 2 ( 0.1%)              | 2 ( 0.1%)              | 4 ( 0.1%)              |
| Food poisoning                                                      | recovered/resolved         | 1 ( <0.1%)             | 6 ( 0.4%)              | 7 ( 0.2%)              |
| Frequent bowel movements                                            | recovering/resolving       | 1 ( <0.1%)             | 0                      | 1 ( <0.1%)             |
|                                                                     | not recovered/not resolved | 1 ( <0.1%)             | 0                      | 1 ( <0.1%)             |
| Gastric ulcer                                                       | recovered/resolved         | 2 ( 0.1%)              | 0                      | 2 ( <0.1%)             |
|                                                                     | not recovered/not resolved | 0                      | 1 ( <0.1%)             | 1 ( <0.1%)             |

**Table 14.3.1 / 14: Number of subjects with adverse events by outcome, primary system organ class and preferred term (FAS)**

| Primary system organ class<br>Preferred term<br>MedDRA version 14.0 | Maximum Derived AE outcome | LCS12<br>N=1432 (100%) | LCS16<br>N=1452 (100%) | Total<br>N=2884 (100%) |
|---------------------------------------------------------------------|----------------------------|------------------------|------------------------|------------------------|
| Gastritis                                                           | recovered/resolved         | 10 ( 0.7%)             | 14 ( 1.0%)             | 24 ( 0.8%)             |
|                                                                     | not recovered/not resolved | 2 ( 0.1%)              | 2 ( 0.1%)              | 4 ( 0.1%)              |
| Gastrointestinal disorder                                           | recovered/resolved         | 1 ( <0.1%)             | 0                      | 1 ( <0.1%)             |
| Gastrointestinal pain                                               | recovered/resolved         | 1 ( <0.1%)             | 1 ( <0.1%)             | 2 ( <0.1%)             |
| Gastroesophageal reflux disease                                     | recovered/resolved         | 4 ( 0.3%)              | 7 ( 0.5%)              | 11 ( 0.4%)             |
|                                                                     | recovering/resolving       | 1 ( <0.1%)             | 0                      | 1 ( <0.1%)             |
|                                                                     | not recovered/not resolved | 3 ( 0.2%)              | 3 ( 0.2%)              | 6 ( 0.2%)              |
| Gingival oedema                                                     | recovered/resolved         | 1 ( <0.1%)             | 0                      | 1 ( <0.1%)             |
| Gingival recession                                                  | recovered/resolved         | 1 ( <0.1%)             | 0                      | 1 ( <0.1%)             |
| Gingivitis                                                          | recovered/resolved         | 1 ( <0.1%)             | 1 ( <0.1%)             | 2 ( <0.1%)             |
| Haematochezia                                                       | recovered/resolved         | 1 ( <0.1%)             | 1 ( <0.1%)             | 2 ( <0.1%)             |
| Haemorrhoids                                                        | recovered/resolved         | 6 ( 0.4%)              | 6 ( 0.4%)              | 12 ( 0.4%)             |
|                                                                     | not recovered/not resolved | 1 ( <0.1%)             | 1 ( <0.1%)             | 2 ( <0.1%)             |
| Hiatus hernia                                                       | recovered/resolved         | 0                      | 1 ( <0.1%)             | 1 ( <0.1%)             |
| Hyperchlorhydria                                                    | recovered/resolved         | 2 ( 0.1%)              | 1 ( <0.1%)             | 3 ( 0.1%)              |
| Impaired gastric emptying                                           | recovering/resolving       | 1 ( <0.1%)             | 0                      | 1 ( <0.1%)             |
| Inguinal hernia                                                     | recovered/resolved         | 1 ( <0.1%)             | 0                      | 1 ( <0.1%)             |
| Irritable bowel syndrome                                            | recovered/resolved         | 4 ( 0.3%)              | 1 ( <0.1%)             | 5 ( 0.2%)              |
|                                                                     | not recovered/not resolved | 7 ( 0.5%)              | 4 ( 0.3%)              | 11 ( 0.4%)             |
| Mouth ulceration                                                    | recovered/resolved         | 0                      | 2 ( 0.1%)              | 2 ( <0.1%)             |

**Table 14.3.1 / 14: Number of subjects with adverse events by outcome, primary system organ class and preferred term (FAS)**

| Primary system organ class<br>Preferred term<br>MedDRA version 14.0 | Maximum Derived AE outcome | LCS12<br>N=1432 (100%) | LCS16<br>N=1452 (100%) | Total<br>N=2884 (100%) |
|---------------------------------------------------------------------|----------------------------|------------------------|------------------------|------------------------|
| Nausea                                                              | recovered/resolved         | 61 ( 4.3%)             | 47 ( 3.2%)             | 108 ( 3.7%)            |
|                                                                     | recovering/resolving       | 1 ( <0.1%)             | 2 ( 0.1%)              | 3 ( 0.1%)              |
|                                                                     | not recovered/not resolved | 11 ( 0.8%)             | 5 ( 0.3%)              | 16 ( 0.6%)             |
| Odynophagia                                                         | recovered/resolved         | 0                      | 1 ( <0.1%)             | 1 ( <0.1%)             |
| Oesophageal stenosis                                                | not recovered/not resolved | 0                      | 1 ( <0.1%)             | 1 ( <0.1%)             |
| Oesophagitis                                                        | recovering/resolving       | 1 ( <0.1%)             | 0                      | 1 ( <0.1%)             |
| Oral pain                                                           | recovered/resolved         | 0                      | 1 ( <0.1%)             | 1 ( <0.1%)             |
| Peptic ulcer                                                        | recovered/resolved         | 1 ( <0.1%)             | 0                      | 1 ( <0.1%)             |
| Periodontitis                                                       | recovered/resolved         | 2 ( 0.1%)              | 1 ( <0.1%)             | 3 ( 0.1%)              |
| Peritonitis                                                         | recovered/resolved         | 1 ( <0.1%)             | 0                      | 1 ( <0.1%)             |
| Proctalgia                                                          | recovered/resolved         | 2 ( 0.1%)              | 1 ( <0.1%)             | 3 ( 0.1%)              |
| Rectal haemorrhage                                                  | recovered/resolved         | 0                      | 3 ( 0.2%)              | 3 ( 0.1%)              |
| Reflux oesophagitis                                                 | not recovered/not resolved | 0                      | 1 ( <0.1%)             | 1 ( <0.1%)             |
| Salivary gland calculus                                             | not recovered/not resolved | 0                      | 1 ( <0.1%)             | 1 ( <0.1%)             |
| Tooth disorder                                                      | recovered/resolved         | 3 ( 0.2%)              | 1 ( <0.1%)             | 4 ( 0.1%)              |
| Tooth impacted                                                      | recovered/resolved         | 2 ( 0.1%)              | 0                      | 2 ( <0.1%)             |
| Toothache                                                           | recovered/resolved         | 17 ( 1.2%)             | 26 ( 1.8%)             | 43 ( 1.5%)             |
| Umbilical hernia                                                    | recovered/resolved         | 0                      | 1 ( <0.1%)             | 1 ( <0.1%)             |
| Vomiting                                                            | recovered/resolved         | 15 ( 1.0%)             | 23 ( 1.6%)             | 38 ( 1.3%)             |
|                                                                     | recovering/resolving       | 1 ( <0.1%)             | 0                      | 1 ( <0.1%)             |
|                                                                     | not recovered/not resolved | 1 ( <0.1%)             | 0                      | 1 ( <0.1%)             |

**Table 14.3.1 / 14: Number of subjects with adverse events by outcome, primary system organ class and preferred term (FAS)**

| Primary system organ class                           |                                        | LCS12         | LCS16         | Total         |
|------------------------------------------------------|----------------------------------------|---------------|---------------|---------------|
| Preferred term                                       |                                        | N=1432 (100%) | N=1452 (100%) | N=2884 (100%) |
| MedDRA version 14.0                                  | Maximum Derived AE outcome             |               |               |               |
| General disorders and administration site conditions | recovered/resolved                     | 96 ( 6.7%)    | 99 ( 6.8%)    | 195 ( 6.8%)   |
|                                                      | recovering/resolving                   | 2 ( 0.1%)     | 2 ( 0.1%)     | 4 ( 0.1%)     |
|                                                      | not recovered/not resolved             | 12 ( 0.8%)    | 15 ( 1.0%)    | 27 ( 0.9%)    |
|                                                      | recovered/resolved with resid. effects | 1 (<0.1%)     | 0             | 1 (<0.1%)     |
| Asthenia                                             | recovered/resolved                     | 1 (<0.1%)     | 1 (<0.1%)     | 2 (<0.1%)     |
|                                                      | not recovered/not resolved             | 1 (<0.1%)     | 0             | 1 (<0.1%)     |
| Axillary pain                                        | recovered/resolved                     | 0             | 1 (<0.1%)     | 1 (<0.1%)     |
|                                                      | not recovered/not resolved             | 1 (<0.1%)     | 0             | 1 (<0.1%)     |
| Chest pain                                           | recovered/resolved                     | 5 ( 0.3%)     | 7 ( 0.5%)     | 12 ( 0.4%)    |
| Chills                                               | recovered/resolved                     | 0             | 2 ( 0.1%)     | 2 (<0.1%)     |
| Cyst                                                 | recovered/resolved                     | 2 ( 0.1%)     | 1 (<0.1%)     | 3 ( 0.1%)     |
|                                                      | not recovered/not resolved             | 1 (<0.1%)     | 0             | 1 (<0.1%)     |
| Device dislocation                                   | recovered/resolved                     | 3 ( 0.2%)     | 5 ( 0.3%)     | 8 ( 0.3%)     |
| Device expulsion                                     | recovered/resolved                     | 46 ( 3.2%)    | 36 ( 2.5%)    | 82 ( 2.8%)    |
| Discomfort                                           | recovered/resolved                     | 2 ( 0.1%)     | 0             | 2 (<0.1%)     |
|                                                      | not recovered/not resolved             | 0             | 1 (<0.1%)     | 1 (<0.1%)     |
| Fatigue                                              | recovered/resolved                     | 14 ( 1.0%)    | 19 ( 1.3%)    | 33 ( 1.1%)    |
|                                                      | recovering/resolving                   | 2 ( 0.1%)     | 0             | 2 (<0.1%)     |
|                                                      | not recovered/not resolved             | 6 ( 0.4%)     | 8 ( 0.6%)     | 14 ( 0.5%)    |
| Feeling cold                                         | recovered/resolved                     | 0             | 1 (<0.1%)     | 1 (<0.1%)     |
|                                                      | not recovered/not resolved             | 0             | 1 (<0.1%)     | 1 (<0.1%)     |
| Feeling hot                                          | recovered/resolved                     | 0             | 1 (<0.1%)     | 1 (<0.1%)     |
| Generalised oedema                                   | not recovered/not resolved             | 1 (<0.1%)     | 0             | 1 (<0.1%)     |
| Hangover                                             | recovered/resolved                     | 1 (<0.1%)     | 0             | 1 (<0.1%)     |

**Table 14.3.1 / 14: Number of subjects with adverse events by outcome, primary system organ class and preferred term (FAS)**

| Primary system organ class | Preferred term                | Maximum Derived AE outcome                                                                 | LCS12<br>N=1432 (100%)                | LCS16<br>N=1452 (100%)                | Total<br>N=2884 (100%)                 |
|----------------------------|-------------------------------|--------------------------------------------------------------------------------------------|---------------------------------------|---------------------------------------|----------------------------------------|
|                            | MedDRA version 14.0           |                                                                                            |                                       |                                       |                                        |
|                            | Hunger                        | recovered/resolved                                                                         | 0                                     | 1 ( <0.1%)                            | 1 ( <0.1%)                             |
|                            | Inflammation                  | recovered/resolved                                                                         | 1 ( <0.1%)                            | 1 ( <0.1%)                            | 2 ( <0.1%)                             |
|                            | Influenza like illness        | recovered/resolved                                                                         | 1 ( <0.1%)                            | 1 ( <0.1%)                            | 2 ( <0.1%)                             |
|                            | Injury associated with device | recovered/resolved                                                                         | 0                                     | 1 ( <0.1%)                            | 1 ( <0.1%)                             |
|                            | Irritability                  | recovered/resolved<br>not recovered/not resolved                                           | 1 ( <0.1%)<br>1 ( <0.1%)              | 4 ( 0.3%)<br>1 ( <0.1%)               | 5 ( 0.2%)<br>2 ( <0.1%)                |
|                            | Localised oedema              | recovering/resolving                                                                       | 0                                     | 1 ( <0.1%)                            | 1 ( <0.1%)                             |
|                            | Oedema                        | not recovered/not resolved                                                                 | 0                                     | 1 ( <0.1%)                            | 1 ( <0.1%)                             |
|                            | Oedema peripheral             | recovered/resolved<br>recovering/resolving<br>not recovered/not resolved                   | 3 ( 0.2%)<br>0<br>1 ( <0.1%)          | 4 ( 0.3%)<br>1 ( <0.1%)<br>1 ( <0.1%) | 7 ( 0.2%)<br>1 ( <0.1%)<br>2 ( <0.1%)  |
|                            | Pain                          | recovered/resolved<br>not recovered/not resolved<br>recovered/resolved with resid. effects | 4 ( 0.3%)<br>1 ( <0.1%)<br>1 ( <0.1%) | 4 ( 0.3%)<br>1 ( <0.1%)<br>0          | 8 ( 0.3%)<br>2 ( <0.1%)<br>1 ( <0.1%)  |
|                            | Pyrexia                       | recovered/resolved<br>not recovered/not resolved                                           | 18 ( 1.3%)<br>0                       | 15 ( 1.0%)<br>1 ( <0.1%)              | 33 ( 1.1%)<br>1 ( <0.1%)               |
|                            | Vaccination site pain         | recovered/resolved                                                                         | 1 ( <0.1%)                            | 1 ( <0.1%)                            | 2 ( <0.1%)                             |
|                            | Hepatobiliary disorders       | recovered/resolved<br>not recovered/not resolved<br>recovered/resolved with resid. effects | 6 ( 0.4%)<br>1 ( <0.1%)<br>1 ( <0.1%) | 9 ( 0.6%)<br>1 ( <0.1%)<br>0          | 15 ( 0.5%)<br>2 ( <0.1%)<br>1 ( <0.1%) |
|                            | Biliary colic                 | recovered/resolved                                                                         | 0                                     | 1 ( <0.1%)                            | 1 ( <0.1%)                             |
|                            | Biliary dyskinesia            | recovered/resolved                                                                         | 1 ( <0.1%)                            | 1 ( <0.1%)                            | 2 ( <0.1%)                             |
|                            | Cholecystitis                 | recovered/resolved<br>recovered/resolved with resid. effects                               | 2 ( 0.1%)<br>1 ( <0.1%)               | 2 ( 0.1%)<br>0                        | 4 ( 0.1%)<br>1 ( <0.1%)                |

**Table 14.3.1 / 14: Number of subjects with adverse events by outcome, primary system organ class and preferred term (FAS)**

| Primary system organ class | Preferred term             | Maximum Derived AE outcome | LCS12<br>N=1432 (100%)     | LCS16<br>N=1452 (100%) | Total<br>N=2884 (100%) |            |
|----------------------------|----------------------------|----------------------------|----------------------------|------------------------|------------------------|------------|
| Primary system organ class | MedDRA version 14.0        | Cholecystitis chronic      | recovered/resolved         | 2 ( 0.1%)              | 0                      | 2 ( <0.1%) |
|                            |                            | Cholelithiasis             | recovered/resolved         | 3 ( 0.2%)              | 4 ( 0.3%)              | 7 ( 0.2%)  |
|                            |                            |                            | not recovered/not resolved | 1 ( <0.1%)             | 0                      | 1 ( <0.1%) |
|                            |                            | Gallbladder pain           | recovered/resolved         | 0                      | 1 ( <0.1%)             | 1 ( <0.1%) |
|                            |                            |                            | not recovered/not resolved | 0                      | 0                      | 0          |
|                            |                            | Gallbladder polyp          | recovered/resolved         | 1 ( <0.1%)             | 0                      | 1 ( <0.1%) |
|                            |                            |                            | not recovered/not resolved | 0                      | 0                      | 0          |
|                            |                            | Hepatic steatosis          | recovered/resolved         | 0                      | 1 ( <0.1%)             | 1 ( <0.1%) |
|                            |                            |                            | not recovered/not resolved | 0                      | 0                      | 0          |
|                            |                            | Hyperbilirubinaemia        | recovered/resolved         | 0                      | 1 ( <0.1%)             | 1 ( <0.1%) |
| not recovered/not resolved | 0                          |                            | 0                          | 0                      |                        |            |
| Immune system disorders    | Allergy to animal          | recovered/resolved         | 50 ( 3.5%)                 | 44 ( 3.0%)             | 94 ( 3.3%)             |            |
|                            |                            | not recovered/not resolved | 10 ( 0.7%)                 | 21 ( 1.4%)             | 31 ( 1.1%)             |            |
|                            | Allergy to arthropod bite  | recovered/resolved         | 1 ( <0.1%)                 | 1 ( <0.1%)             | 2 ( <0.1%)             |            |
|                            |                            | not recovered/not resolved | 0                          | 1 ( <0.1%)             | 1 ( <0.1%)             |            |
|                            | Allergy to arthropod sting | recovered/resolved         | 1 ( <0.1%)                 | 1 ( <0.1%)             | 2 ( <0.1%)             |            |
|                            |                            | not recovered/not resolved | 0                          | 0                      | 0                      |            |
|                            | Allergy to chemicals       | recovered/resolved         | 0                          | 1 ( <0.1%)             | 1 ( <0.1%)             |            |
|                            |                            | not recovered/not resolved | 0                          | 0                      | 0                      |            |
|                            | Anaphylactic reaction      | recovered/resolved         | 0                          | 1 ( <0.1%)             | 1 ( <0.1%)             |            |
|                            |                            | not recovered/not resolved | 0                          | 0                      | 0                      |            |
|                            | Drug hypersensitivity      | recovered/resolved         | 7 ( 0.5%)                  | 6 ( 0.4%)              | 13 ( 0.5%)             |            |
|                            |                            | not recovered/not resolved | 1 ( <0.1%)                 | 0                      | 1 ( <0.1%)             |            |
|                            | Food allergy               | recovered/resolved         | 1 ( <0.1%)                 | 1 ( <0.1%)             | 2 ( <0.1%)             |            |
|                            |                            | not recovered/not resolved | 0                          | 0                      | 0                      |            |
|                            | Hypersensitivity           | recovered/resolved         | 13 ( 0.9%)                 | 8 ( 0.6%)              | 21 ( 0.7%)             |            |
|                            |                            | not recovered/not resolved | 0                          | 3 ( 0.2%)              | 3 ( 0.1%)              |            |
|                            | Seasonal allergy           | recovered/resolved         | 28 ( 2.0%)                 | 26 ( 1.8%)             | 54 ( 1.9%)             |            |
| not recovered/not resolved |                            | 9 ( 0.6%)                  | 17 ( 1.2%)                 | 26 ( 0.9%)             |                        |            |

**Table 14.3.1 / 14: Number of subjects with adverse events by outcome, primary system organ class and preferred term (FAS)**

| Primary system organ class<br>Preferred term<br>MedDRA version 14.0 | Maximum Derived AE outcome             | LCS12<br>N=1432 (100%) | LCS16<br>N=1452 (100%) | Total<br>N=2884 (100%) |
|---------------------------------------------------------------------|----------------------------------------|------------------------|------------------------|------------------------|
| Infections and infestations                                         | recovered/resolved                     | 653 ( 45.6%)           | 683 ( 47.0%)           | 1336 ( 46.3%)          |
|                                                                     | recovering/resolving                   | 8 ( 0.6%)              | 8 ( 0.6%)              | 16 ( 0.6%)             |
|                                                                     | not recovered/not resolved             | 55 ( 3.8%)             | 42 ( 2.9%)             | 97 ( 3.4%)             |
|                                                                     | recovered/resolved with resid. effects | 3 ( 0.2%)              | 1 ( <0.1%)             | 4 ( 0.1%)              |
| Abscess limb                                                        | recovered/resolved                     | 0                      | 1 ( <0.1%)             | 1 ( <0.1%)             |
| Acarodermatitis                                                     | recovered/resolved                     | 2 ( 0.1%)              | 0                      | 2 ( <0.1%)             |
| Acute sinusitis                                                     | recovered/resolved                     | 6 ( 0.4%)              | 3 ( 0.2%)              | 9 ( 0.3%)              |
|                                                                     | not recovered/not resolved             | 1 ( <0.1%)             | 0                      | 1 ( <0.1%)             |
| Acute tonsillitis                                                   | Continuing with change                 | 0                      | 1 ( <0.1%)             | 1 ( <0.1%)             |
|                                                                     | recovered/resolved                     | 9 ( 0.6%)              | 4 ( 0.3%)              | 13 ( 0.5%)             |
|                                                                     | recovering/resolving                   | 1 ( <0.1%)             | 0                      | 1 ( <0.1%)             |
| Anogenital warts                                                    | recovered/resolved                     | 10 ( 0.7%)             | 9 ( 0.6%)              | 19 ( 0.7%)             |
|                                                                     | not recovered/not resolved             | 1 ( <0.1%)             | 1 ( <0.1%)             | 2 ( <0.1%)             |
| Appendicitis                                                        | recovered/resolved                     | 6 ( 0.4%)              | 6 ( 0.4%)              | 12 ( 0.4%)             |
|                                                                     | recovered/resolved with resid. effects | 0                      | 1 ( <0.1%)             | 1 ( <0.1%)             |
| Arthritis rubella                                                   | recovered/resolved                     | 1 ( <0.1%)             | 0                      | 1 ( <0.1%)             |
| Bartholin's abscess                                                 | recovered/resolved                     | 2 ( 0.1%)              | 0                      | 2 ( <0.1%)             |
| Blastocystis infection                                              | recovered/resolved                     | 0                      | 1 ( <0.1%)             | 1 ( <0.1%)             |
| Body tinea                                                          | recovered/resolved                     | 1 ( <0.1%)             | 2 ( 0.1%)              | 3 ( 0.1%)              |
|                                                                     | not recovered/not resolved             | 1 ( <0.1%)             | 0                      | 1 ( <0.1%)             |
| Bronchitis                                                          | recovered/resolved                     | 57 ( 4.0%)             | 38 ( 2.6%)             | 95 ( 3.3%)             |
|                                                                     | not recovered/not resolved             | 1 ( <0.1%)             | 0                      | 1 ( <0.1%)             |
| Bronchitis viral                                                    | recovered/resolved                     | 1 ( <0.1%)             | 0                      | 1 ( <0.1%)             |
| Bronchopneumonia                                                    | recovered/resolved                     | 1 ( <0.1%)             | 0                      | 1 ( <0.1%)             |



**Table 14.3.1 / 14: Number of subjects with adverse events by outcome, primary system organ class and preferred term (FAS)**

| Primary system organ class<br>Preferred term<br>MedDRA version 14.0 | Maximum Derived AE outcome                       | LCS12<br>N=1432 (100%) | LCS16<br>N=1452 (100%)   | Total<br>N=2884 (100%)   |
|---------------------------------------------------------------------|--------------------------------------------------|------------------------|--------------------------|--------------------------|
| Bursitis infective                                                  | recovered/resolved                               | 1 ( <0.1%)             | 0                        | 1 ( <0.1%)               |
| Campylobacter infection                                             | recovered/resolved                               | 1 ( <0.1%)             | 0                        | 1 ( <0.1%)               |
| Campylobacter intestinal infection                                  | recovered/resolved                               | 0                      | 1 ( <0.1%)               | 1 ( <0.1%)               |
| Candidiasis                                                         | recovered/resolved<br>not recovered/not resolved | 9 ( 0.6%)<br>2 ( 0.1%) | 8 ( 0.6%)<br>1 ( <0.1%)  | 17 ( 0.6%)<br>3 ( 0.1%)  |
| Carbuncle                                                           | recovered/resolved                               | 0                      | 1 ( <0.1%)               | 1 ( <0.1%)               |
| Cellulitis                                                          | recovered/resolved                               | 3 ( 0.2%)              | 4 ( 0.3%)                | 7 ( 0.2%)                |
| Cervicitis                                                          | recovered/resolved<br>not recovered/not resolved | 5 ( 0.3%)<br>0         | 14 ( 1.0%)<br>1 ( <0.1%) | 19 ( 0.7%)<br>1 ( <0.1%) |
| Cervicitis gonococcal                                               | recovered/resolved                               | 1 ( <0.1%)             | 0                        | 1 ( <0.1%)               |
| Chlamydial cervicitis                                               | recovered/resolved<br>not recovered/not resolved | 2 ( 0.1%)<br>0         | 5 ( 0.3%)<br>1 ( <0.1%)  | 7 ( 0.2%)<br>1 ( <0.1%)  |
| Chlamydial infection                                                | recovered/resolved                               | 1 ( <0.1%)             | 4 ( 0.3%)                | 5 ( 0.2%)                |
| Chronic tonsillitis                                                 | recovered/resolved                               | 0                      | 1 ( <0.1%)               | 1 ( <0.1%)               |
| Clitoris abscess                                                    | recovered/resolved                               | 1 ( <0.1%)             | 0                        | 1 ( <0.1%)               |
| Conjunctivitis bacterial                                            | recovered/resolved                               | 1 ( <0.1%)             | 2 ( 0.1%)                | 3 ( 0.1%)                |
| Conjunctivitis infective                                            | recovered/resolved                               | 2 ( 0.1%)              | 0                        | 2 ( <0.1%)               |
| Conjunctivitis viral                                                | recovered/resolved                               | 1 ( <0.1%)             | 1 ( <0.1%)               | 2 ( <0.1%)               |
| Coxsackie viral infection                                           | recovered/resolved                               | 2 ( 0.1%)              | 1 ( <0.1%)               | 3 ( 0.1%)                |
| Cystitis                                                            | recovered/resolved<br>recovering/resolving       | 30 ( 2.1%)<br>0        | 25 ( 1.7%)<br>1 ( <0.1%) | 55 ( 1.9%)<br>1 ( <0.1%) |

**Table 14.3.1 / 14: Number of subjects with adverse events by outcome, primary system organ class and preferred term (FAS)**

| Primary system organ class<br>Preferred term<br>MedDRA version 14.0 | Maximum Derived AE outcome                                               | LCS12<br>N=1432 (100%)      | LCS16<br>N=1452 (100%)        | Total<br>N=2884 (100%)                 |
|---------------------------------------------------------------------|--------------------------------------------------------------------------|-----------------------------|-------------------------------|----------------------------------------|
| Dengue fever                                                        | recovered/resolved                                                       | 2 ( 0.1%)                   | 0                             | 2 ( <0.1%)                             |
| Diarrhoea infectious                                                | recovered/resolved                                                       | 1 ( <0.1%)                  | 2 ( 0.1%)                     | 3 ( 0.1%)                              |
| Diverticulitis                                                      | recovered/resolved                                                       | 1 ( <0.1%)                  | 1 ( <0.1%)                    | 2 ( <0.1%)                             |
| Ear infection                                                       | recovered/resolved<br>not recovered/not resolved                         | 27 ( 1.9%)<br>0             | 11 ( 0.8%)<br>2 ( 0.1%)       | 38 ( 1.3%)<br>2 ( <0.1%)               |
| Ear infection bacterial                                             | recovered/resolved                                                       | 1 ( <0.1%)                  | 0                             | 1 ( <0.1%)                             |
| Endometritis                                                        | recovered/resolved<br>recovering/resolving<br>not recovered/not resolved | 9 ( 0.6%)<br>0<br>2 ( 0.1%) | 10 ( 0.7%)<br>1 ( <0.1%)<br>0 | 19 ( 0.7%)<br>1 ( <0.1%)<br>2 ( <0.1%) |
| Enterobiasis                                                        | recovered/resolved                                                       | 3 ( 0.2%)                   | 1 ( <0.1%)                    | 4 ( 0.1%)                              |
| Enterocolitis infectious                                            | recovered/resolved                                                       | 2 ( 0.1%)                   | 0                             | 2 ( <0.1%)                             |
| Epstein-Barr virus infection                                        | recovered/resolved                                                       | 0                           | 1 ( <0.1%)                    | 1 ( <0.1%)                             |
| Erysipelas                                                          | recovered/resolved                                                       | 1 ( <0.1%)                  | 0                             | 1 ( <0.1%)                             |
| Erythema infectiosum                                                | recovered/resolved                                                       | 1 ( <0.1%)                  | 0                             | 1 ( <0.1%)                             |
| Escherichia urinary tract infection                                 | recovered/resolved                                                       | 0                           | 1 ( <0.1%)                    | 1 ( <0.1%)                             |
| Escherichia vaginitis                                               | recovered/resolved                                                       | 1 ( <0.1%)                  | 0                             | 1 ( <0.1%)                             |
| Eye infection                                                       | recovered/resolved                                                       | 0                           | 1 ( <0.1%)                    | 1 ( <0.1%)                             |
| Eyelid infection                                                    | recovered/resolved                                                       | 1 ( <0.1%)                  | 0                             | 1 ( <0.1%)                             |
| Folliculitis                                                        | recovered/resolved<br>not recovered/not resolved                         | 3 ( 0.2%)<br>2 ( 0.1%)      | 5 ( 0.3%)<br>1 ( <0.1%)       | 8 ( 0.3%)<br>3 ( 0.1%)                 |

**Table 14.3.1 / 14: Number of subjects with adverse events by outcome, primary system organ class and preferred term (FAS)**

| Primary system organ class<br>Preferred term<br>MedDRA version 14.0 | Maximum Derived AE outcome | LCS12<br>N=1432 (100%) | LCS16<br>N=1452 (100%) | Total<br>N=2884 (100%) |
|---------------------------------------------------------------------|----------------------------|------------------------|------------------------|------------------------|
| Fungal infection                                                    | recovered/resolved         | 5 ( 0.3%)              | 7 ( 0.5%)              | 12 ( 0.4%)             |
|                                                                     | not recovered/not resolved | 0                      | 1 (<0.1%)              | 1 (<0.1%)              |
| Fungal skin infection                                               | recovered/resolved         | 3 ( 0.2%)              | 1 (<0.1%)              | 4 ( 0.1%)              |
| Furuncle                                                            | recovered/resolved         | 1 (<0.1%)              | 1 (<0.1%)              | 2 (<0.1%)              |
| Gastritis bacterial                                                 | recovered/resolved         | 0                      | 1 (<0.1%)              | 1 (<0.1%)              |
| Gastritis viral                                                     | recovered/resolved         | 0                      | 1 (<0.1%)              | 1 (<0.1%)              |
| Gastroenteritis                                                     | Continuing with change     | 0                      | 1 (<0.1%)              | 1 (<0.1%)              |
|                                                                     | recovered/resolved         | 31 ( 2.2%)             | 28 ( 1.9%)             | 59 ( 2.0%)             |
| Gastroenteritis rotavirus                                           | recovered/resolved         | 0                      | 1 (<0.1%)              | 1 (<0.1%)              |
| Gastroenteritis viral                                               | recovered/resolved         | 7 ( 0.5%)              | 8 ( 0.6%)              | 15 ( 0.5%)             |
| Gastrointestinal bacterial infection                                | recovered/resolved         | 0                      | 1 (<0.1%)              | 1 (<0.1%)              |
| Gastrointestinal viral infection                                    | recovered/resolved         | 1 (<0.1%)              | 2 ( 0.1%)              | 3 ( 0.1%)              |
| Genital candidiasis                                                 | recovered/resolved         | 1 (<0.1%)              | 2 ( 0.1%)              | 3 ( 0.1%)              |
|                                                                     | not recovered/not resolved | 0                      | 1 (<0.1%)              | 1 (<0.1%)              |
| Genital herpes                                                      | recovered/resolved         | 8 ( 0.6%)              | 12 ( 0.8%)             | 20 ( 0.7%)             |
|                                                                     | not recovered/not resolved | 2 ( 0.1%)              | 2 ( 0.1%)              | 4 ( 0.1%)              |
| Genital infection fungal                                            | recovered/resolved         | 1 (<0.1%)              | 0                      | 1 (<0.1%)              |
| Giardiasis                                                          | recovered/resolved         | 1 (<0.1%)              | 0                      | 1 (<0.1%)              |
| Gonorrhoea                                                          | recovered/resolved         | 1 (<0.1%)              | 1 (<0.1%)              | 2 (<0.1%)              |
| Groin infection                                                     | recovered/resolved         | 2 ( 0.1%)              | 0                      | 2 (<0.1%)              |

**Table 14.3.1 / 14: Number of subjects with adverse events by outcome, primary system organ class and preferred term (FAS)**

| Primary system organ class         |                                        | LCS12         | LCS16         | Total         |
|------------------------------------|----------------------------------------|---------------|---------------|---------------|
| Preferred term                     | Maximum Derived AE outcome             | N=1432 (100%) | N=1452 (100%) | N=2884 (100%) |
| MedDRA version 14.0                |                                        |               |               |               |
| Gynaecological chlamydia infection | recovered/resolved                     | 2 ( 0.1%)     | 5 ( 0.3%)     | 7 ( 0.2%)     |
|                                    | not recovered/not resolved             | 1 ( <0.1%)    | 0             | 1 ( <0.1%)    |
| H1N1 influenza                     | recovered/resolved                     | 7 ( 0.5%)     | 5 ( 0.3%)     | 12 ( 0.4%)    |
| Haemophilus infection              | recovered/resolved                     | 0             | 1 ( <0.1%)    | 1 ( <0.1%)    |
| Hand-foot-and-mouth disease        | recovered/resolved                     | 0             | 1 ( <0.1%)    | 1 ( <0.1%)    |
| Helicobacter gastritis             | recovered/resolved                     | 1 ( <0.1%)    | 1 ( <0.1%)    | 2 ( <0.1%)    |
| Helicobacter infection             | recovered/resolved                     | 1 ( <0.1%)    | 0             | 1 ( <0.1%)    |
| Herpes dermatitis                  | recovered/resolved                     | 1 ( <0.1%)    | 1 ( <0.1%)    | 2 ( <0.1%)    |
| Herpes simplex                     | recovered/resolved                     | 1 ( <0.1%)    | 1 ( <0.1%)    | 2 ( <0.1%)    |
|                                    | not recovered/not resolved             | 0             | 2 ( 0.1%)     | 2 ( <0.1%)    |
| Herpes zoster                      | recovered/resolved                     | 7 ( 0.5%)     | 4 ( 0.3%)     | 11 ( 0.4%)    |
| Impetigo                           | recovered/resolved                     | 3 ( 0.2%)     | 2 ( 0.1%)     | 5 ( 0.2%)     |
|                                    | recovering/resolving                   | 1 ( <0.1%)    | 0             | 1 ( <0.1%)    |
| Infected bites                     | recovered/resolved                     | 2 ( 0.1%)     | 0             | 2 ( <0.1%)    |
| Infected cyst                      | recovered/resolved                     | 0             | 1 ( <0.1%)    | 1 ( <0.1%)    |
| Infection                          | recovered/resolved                     | 0             | 1 ( <0.1%)    | 1 ( <0.1%)    |
| Infectious mononucleosis           | recovered/resolved                     | 0             | 6 ( 0.4%)     | 6 ( 0.2%)     |
|                                    | not recovered/not resolved             | 1 ( <0.1%)    | 0             | 1 ( <0.1%)    |
| Influenza                          | Continuing with change                 | 0             | 1 ( <0.1%)    | 1 ( <0.1%)    |
|                                    | recovered/resolved                     | 70 ( 4.9%)    | 93 ( 6.4%)    | 163 ( 5.7%)   |
|                                    | not recovered/not resolved             | 1 ( <0.1%)    | 0             | 1 ( <0.1%)    |
|                                    | recovered/resolved with resid. effects | 1 ( <0.1%)    | 0             | 1 ( <0.1%)    |

**Table 14.3.1 / 14: Number of subjects with adverse events by outcome, primary system organ class and preferred term (FAS)**

| Primary system organ class<br>Preferred term<br>MedDRA version 14.0 | Maximum Derived AE outcome                                                                         | LCS12<br>N=1432 (100%)                                | LCS16<br>N=1452 (100%)                                | Total<br>N=2884 (100%)                                |
|---------------------------------------------------------------------|----------------------------------------------------------------------------------------------------|-------------------------------------------------------|-------------------------------------------------------|-------------------------------------------------------|
| Keratitis viral                                                     | recovered/resolved                                                                                 | 0                                                     | 1 ( <0.1%)                                            | 1 ( <0.1%)                                            |
| Kidney infection                                                    | recovered/resolved                                                                                 | 2 ( 0.1%)                                             | 4 ( 0.3%)                                             | 6 ( 0.2%)                                             |
| Labyrinthitis                                                       | recovered/resolved                                                                                 | 1 ( <0.1%)                                            | 1 ( <0.1%)                                            | 2 ( <0.1%)                                            |
| Laryngitis                                                          | recovered/resolved                                                                                 | 7 ( 0.5%)                                             | 10 ( 0.7%)                                            | 17 ( 0.6%)                                            |
| Laryngitis bacterial                                                | recovered/resolved                                                                                 | 0                                                     | 1 ( <0.1%)                                            | 1 ( <0.1%)                                            |
| Localised infection                                                 | recovered/resolved<br>recovering/resolving                                                         | 3 ( 0.2%)<br>1 ( <0.1%)                               | 2 ( 0.1%)<br>0                                        | 5 ( 0.2%)<br>1 ( <0.1%)                               |
| Lower respiratory tract infection                                   | recovered/resolved                                                                                 | 3 ( 0.2%)                                             | 1 ( <0.1%)                                            | 4 ( 0.1%)                                             |
| Lower respiratory tract infection bacterial                         | recovered/resolved                                                                                 | 1 ( <0.1%)                                            | 0                                                     | 1 ( <0.1%)                                            |
| Lymph gland infection                                               | recovered/resolved                                                                                 | 1 ( <0.1%)                                            | 0                                                     | 1 ( <0.1%)                                            |
| Malaria                                                             | recovered/resolved                                                                                 | 1 ( <0.1%)                                            | 1 ( <0.1%)                                            | 2 ( <0.1%)                                            |
| Mastitis                                                            | recovered/resolved                                                                                 | 3 ( 0.2%)                                             | 1 ( <0.1%)                                            | 4 ( 0.1%)                                             |
| Meningitis                                                          | recovered/resolved                                                                                 | 1 ( <0.1%)                                            | 0                                                     | 1 ( <0.1%)                                            |
| Meningitis viral                                                    | recovered/resolved                                                                                 | 0                                                     | 1 ( <0.1%)                                            | 1 ( <0.1%)                                            |
| Molluscum contagiosum                                               | not recovered/not resolved                                                                         | 0                                                     | 1 ( <0.1%)                                            | 1 ( <0.1%)                                            |
| Nail infection                                                      | recovered/resolved                                                                                 | 2 ( 0.1%)                                             | 1 ( <0.1%)                                            | 3 ( 0.1%)                                             |
| Nasopharyngitis                                                     | Continuing with change<br>recovered/resolved<br>recovering/resolving<br>not recovered/not resolved | 1 ( <0.1%)<br>100 ( 7.0%)<br>1 ( <0.1%)<br>1 ( <0.1%) | 1 ( <0.1%)<br>106 ( 7.3%)<br>1 ( <0.1%)<br>1 ( <0.1%) | 2 ( <0.1%)<br>206 ( 7.1%)<br>2 ( <0.1%)<br>2 ( <0.1%) |
| Nipple infection                                                    | recovering/resolving                                                                               | 0                                                     | 1 ( <0.1%)                                            | 1 ( <0.1%)                                            |

**Table 14.3.1 / 14: Number of subjects with adverse events by outcome, primary system organ class and preferred term (FAS)**

| Primary system organ class<br>Preferred term<br>MedDRA version 14.0 | Maximum Derived AE outcome | LCS12<br>N=1432 (100%) | LCS16<br>N=1452 (100%) | Total<br>N=2884 (100%) |
|---------------------------------------------------------------------|----------------------------|------------------------|------------------------|------------------------|
| Omphalitis                                                          | recovered/resolved         | 0                      | 1 ( <0.1%)             | 1 ( <0.1%)             |
| Onychomycosis                                                       | recovered/resolved         | 2 ( 0.1%)              | 3 ( 0.2%)              | 5 ( 0.2%)              |
|                                                                     | not recovered/not resolved | 1 ( <0.1%)             | 1 ( <0.1%)             | 2 ( <0.1%)             |
| Oophoritis                                                          | recovered/resolved         | 0                      | 1 ( <0.1%)             | 1 ( <0.1%)             |
| Oral candidiasis                                                    | recovered/resolved         | 0                      | 1 ( <0.1%)             | 1 ( <0.1%)             |
| Oral herpes                                                         | recovered/resolved         | 9 ( 0.6%)              | 9 ( 0.6%)              | 18 ( 0.6%)             |
|                                                                     | not recovered/not resolved | 2 ( 0.1%)              | 1 ( <0.1%)             | 3 ( 0.1%)              |
| Osteomyelitis                                                       | recovered/resolved         | 0                      | 1 ( <0.1%)             | 1 ( <0.1%)             |
| Otitis externa                                                      | recovered/resolved         | 0                      | 3 ( 0.2%)              | 3 ( 0.1%)              |
| Otitis media                                                        | recovered/resolved         | 5 ( 0.3%)              | 6 ( 0.4%)              | 11 ( 0.4%)             |
| Otitis media acute                                                  | recovered/resolved         | 0                      | 1 ( <0.1%)             | 1 ( <0.1%)             |
| Papilloma viral infection                                           | recovered/resolved         | 1 ( <0.1%)             | 1 ( <0.1%)             | 2 ( <0.1%)             |
| Parasitic gastroenteritis                                           | recovered/resolved         | 1 ( <0.1%)             | 0                      | 1 ( <0.1%)             |
| Paronychia                                                          | recovered/resolved         | 1 ( <0.1%)             | 2 ( 0.1%)              | 3 ( 0.1%)              |
| Pelvic infection                                                    | recovered/resolved         | 0                      | 1 ( <0.1%)             | 1 ( <0.1%)             |
| Pelvic inflammatory disease                                         | recovered/resolved         | 4 ( 0.3%)              | 5 ( 0.3%)              | 9 ( 0.3%)              |
|                                                                     | not recovered/not resolved | 1 ( <0.1%)             | 0                      | 1 ( <0.1%)             |
| Peritoneal abscess                                                  | recovered/resolved         | 1 ( <0.1%)             | 0                      | 1 ( <0.1%)             |
| Peritonsillar abscess                                               | recovered/resolved         | 2 ( 0.1%)              | 1 ( <0.1%)             | 3 ( 0.1%)              |
| Pharyngeal abscess                                                  | recovered/resolved         | 1 ( <0.1%)             | 0                      | 1 ( <0.1%)             |

**Table 14.3.1 / 14: Number of subjects with adverse events by outcome, primary system organ class and preferred term (FAS)**

| Primary system organ class | Preferred term                    | Maximum Derived AE outcome             | LCS12<br>N=1432 (100%) | LCS16<br>N=1452 (100%) | Total<br>N=2884 (100%) |
|----------------------------|-----------------------------------|----------------------------------------|------------------------|------------------------|------------------------|
|                            | MedDRA version 14.0               |                                        |                        |                        |                        |
|                            | Pharyngitis                       | recovered/resolved                     | 13 ( 0.9%)             | 21 ( 1.4%)             | 34 ( 1.2%)             |
|                            | Pharyngitis streptococcal         | recovered/resolved                     | 23 ( 1.6%)             | 20 ( 1.4%)             | 43 ( 1.5%)             |
|                            |                                   | not recovered/not resolved             | 0                      | 1 (<0.1%)              | 1 (<0.1%)              |
|                            | Pharyngotonsillitis               | recovered/resolved                     | 1 (<0.1%)              | 0                      | 1 (<0.1%)              |
|                            | Pneumonia                         | recovered/resolved                     | 13 ( 0.9%)             | 14 ( 1.0%)             | 27 ( 0.9%)             |
|                            |                                   | recovering/resolving                   | 0                      | 1 (<0.1%)              | 1 (<0.1%)              |
|                            |                                   | recovered/resolved with resid. effects | 1 (<0.1%)              | 0                      | 1 (<0.1%)              |
|                            | Pneumonia mycoplasmal             | recovered/resolved                     | 1 (<0.1%)              | 0                      | 1 (<0.1%)              |
|                            | Pogosta disease                   | recovered/resolved                     | 1 (<0.1%)              | 0                      | 1 (<0.1%)              |
|                            | Post procedural infection         | recovered/resolved                     | 2 ( 0.1%)              | 1 (<0.1%)              | 3 ( 0.1%)              |
|                            |                                   | recovered/resolved with resid. effects | 1 (<0.1%)              | 0                      | 1 (<0.1%)              |
|                            | Pulpitis dental                   | recovered/resolved                     | 0                      | 1 (<0.1%)              | 1 (<0.1%)              |
|                            | Pyelonephritis                    | recovered/resolved                     | 8 ( 0.6%)              | 3 ( 0.2%)              | 11 ( 0.4%)             |
|                            |                                   | not recovered/not resolved             | 1 (<0.1%)              | 0                      | 1 (<0.1%)              |
|                            | Pyelonephritis acute              | recovered/resolved                     | 2 ( 0.1%)              | 0                      | 2 (<0.1%)              |
|                            | Q fever                           | recovered/resolved                     | 1 (<0.1%)              | 0                      | 1 (<0.1%)              |
|                            | Rash pustular                     | not recovered/not resolved             | 0                      | 1 (<0.1%)              | 1 (<0.1%)              |
|                            | Respiratory tract infection       | recovered/resolved                     | 10 ( 0.7%)             | 15 ( 1.0%)             | 25 ( 0.9%)             |
|                            |                                   | not recovered/not resolved             | 0                      | 1 (<0.1%)              | 1 (<0.1%)              |
|                            | Respiratory tract infection viral | recovered/resolved                     | 2 ( 0.1%)              | 1 (<0.1%)              | 3 ( 0.1%)              |
|                            | Rhinitis                          | recovered/resolved                     | 6 ( 0.4%)              | 11 ( 0.8%)             | 17 ( 0.6%)             |
|                            |                                   | not recovered/not resolved             | 0                      | 1 (<0.1%)              | 1 (<0.1%)              |

**Table 14.3.1 / 14: Number of subjects with adverse events by outcome, primary system organ class and preferred term (FAS)**

| Primary system organ class<br>Preferred term<br>MedDRA version 14.0 | Maximum Derived AE outcome | LCS12<br>N=1432 (100%) | LCS16<br>N=1452 (100%) | Total<br>N=2884 (100%) |
|---------------------------------------------------------------------|----------------------------|------------------------|------------------------|------------------------|
| Salpingitis                                                         | not recovered/not resolved | 1 ( <0.1%)             | 0                      | 1 ( <0.1%)             |
| Salpingo-oophoritis                                                 | recovered/resolved         | 2 ( 0.1%)              | 3 ( 0.2%)              | 5 ( 0.2%)              |
| Sialoadenitis                                                       | recovered/resolved         | 1 ( <0.1%)             | 0                      | 1 ( <0.1%)             |
| Sinobronchitis                                                      | recovered/resolved         | 0                      | 1 ( <0.1%)             | 1 ( <0.1%)             |
| Sinusitis                                                           | recovered/resolved         | 86 ( 6.0%)             | 94 ( 6.5%)             | 180 ( 6.2%)            |
|                                                                     | recovering/resolving       | 1 ( <0.1%)             | 1 ( <0.1%)             | 2 ( <0.1%)             |
|                                                                     | not recovered/not resolved | 3 ( 0.2%)              | 1 ( <0.1%)             | 4 ( 0.1%)              |
| Skin bacterial infection                                            | recovered/resolved         | 1 ( <0.1%)             | 2 ( 0.1%)              | 3 ( 0.1%)              |
| Skin infection                                                      | recovered/resolved         | 1 ( <0.1%)             | 6 ( 0.4%)              | 7 ( 0.2%)              |
| Small intestinal bacterial overgrowth                               | not recovered/not resolved | 0                      | 1 ( <0.1%)             | 1 ( <0.1%)             |
| Staphylococcal infection                                            | recovered/resolved         | 1 ( <0.1%)             | 1 ( <0.1%)             | 2 ( <0.1%)             |
| Staphylococcal skin infection                                       | recovered/resolved         | 1 ( <0.1%)             | 0                      | 1 ( <0.1%)             |
| Streptococcal infection                                             | recovered/resolved         | 1 ( <0.1%)             | 0                      | 1 ( <0.1%)             |
| Streptococcal sepsis                                                | recovered/resolved         | 1 ( <0.1%)             | 0                      | 1 ( <0.1%)             |
| Subcutaneous abscess                                                | recovered/resolved         | 3 ( 0.2%)              | 2 ( 0.1%)              | 5 ( 0.2%)              |
| Sweat gland infection                                               | recovered/resolved         | 1 ( <0.1%)             | 0                      | 1 ( <0.1%)             |
| Tinea infection                                                     | recovered/resolved         | 1 ( <0.1%)             | 2 ( 0.1%)              | 3 ( 0.1%)              |
| Tinea pedis                                                         | recovered/resolved         | 0                      | 1 ( <0.1%)             | 1 ( <0.1%)             |
|                                                                     | not recovered/not resolved | 1 ( <0.1%)             | 0                      | 1 ( <0.1%)             |
| Tinea versicolour                                                   | recovered/resolved         | 0                      | 1 ( <0.1%)             | 1 ( <0.1%)             |



**Table 14.3.1 / 14: Number of subjects with adverse events by outcome, primary system organ class and preferred term (FAS)**

| Primary system organ class        |                            | LCS12         | LCS16         | Total         |
|-----------------------------------|----------------------------|---------------|---------------|---------------|
| Preferred term                    | Maximum Derived AE outcome | N=1432 (100%) | N=1452 (100%) | N=2884 (100%) |
| MedDRA version 14.0               |                            |               |               |               |
| Tonsillitis                       | recovered/resolved         | 24 ( 1.7%)    | 22 ( 1.5%)    | 46 ( 1.6%)    |
|                                   | recovering/resolving       | 0             | 1 (<0.1%)     | 1 (<0.1%)     |
|                                   | not recovered/not resolved | 1 (<0.1%)     | 0             | 1 (<0.1%)     |
| Tonsillitis streptococcal         | recovered/resolved         | 1 (<0.1%)     | 0             | 1 (<0.1%)     |
| Tooth abscess                     | recovered/resolved         | 5 ( 0.3%)     | 4 ( 0.3%)     | 9 ( 0.3%)     |
| Tooth infection                   | recovered/resolved         | 24 ( 1.7%)    | 15 ( 1.0%)    | 39 ( 1.4%)    |
|                                   | recovering/resolving       | 1 (<0.1%)     | 0             | 1 (<0.1%)     |
| Tracheitis                        | recovered/resolved         | 1 (<0.1%)     | 0             | 1 (<0.1%)     |
| Trichomoniasis                    | recovered/resolved         | 2 ( 0.1%)     | 2 ( 0.1%)     | 4 ( 0.1%)     |
| Tuberculosis                      | recovered/resolved         | 1 (<0.1%)     | 0             | 1 (<0.1%)     |
| Tubo-ovarian abscess              | recovered/resolved         | 1 (<0.1%)     | 0             | 1 (<0.1%)     |
| Typhoid fever                     | recovered/resolved         | 0             | 1 (<0.1%)     | 1 (<0.1%)     |
| Upper respiratory tract infection | recovered/resolved         | 50 ( 3.5%)    | 56 ( 3.9%)    | 106 ( 3.7%)   |
|                                   | not recovered/not resolved | 0             | 1 (<0.1%)     | 1 (<0.1%)     |
| Ureaplasma infection              | recovered/resolved         | 1 (<0.1%)     | 0             | 1 (<0.1%)     |
| Urinary tract infection           | recovered/resolved         | 149 ( 10.4%)  | 138 ( 9.5%)   | 287 ( 10.0%)  |
|                                   | recovering/resolving       | 1 (<0.1%)     | 1 (<0.1%)     | 2 (<0.1%)     |
|                                   | not recovered/not resolved | 8 ( 0.6%)     | 3 ( 0.2%)     | 11 ( 0.4%)    |
| Uterine infection                 | recovered/resolved         | 0             | 1 (<0.1%)     | 1 (<0.1%)     |
| Vaginal infection                 | recovered/resolved         | 45 ( 3.1%)    | 58 ( 4.0%)    | 103 ( 3.6%)   |
|                                   | recovering/resolving       | 1 (<0.1%)     | 0             | 1 (<0.1%)     |
|                                   | not recovered/not resolved | 2 ( 0.1%)     | 2 ( 0.1%)     | 4 ( 0.1%)     |

**Table 14.3.1 / 14: Number of subjects with adverse events by outcome, primary system organ class and preferred term (FAS)**

| Primary system organ class<br>Preferred term<br>MedDRA version 14.0 | Maximum Derived AE outcome | LCS12<br>N=1432 (100%) | LCS16<br>N=1452 (100%) | Total<br>N=2884 (100%) |
|---------------------------------------------------------------------|----------------------------|------------------------|------------------------|------------------------|
| Vaginitis bacterial                                                 | recovered/resolved         | 94 ( 6.6%)             | 119 ( 8.2%)            | 213 ( 7.4%)            |
|                                                                     | recovering/resolving       | 0                      | 1 (<0.1%)              | 1 (<0.1%)              |
|                                                                     | not recovered/not resolved | 10 ( 0.7%)             | 7 ( 0.5%)              | 17 ( 0.6%)             |
| Vaginitis chlamydial                                                | recovered/resolved         | 2 ( 0.1%)              | 1 (<0.1%)              | 3 ( 0.1%)              |
| Vaginitis gardnerella                                               | recovered/resolved         | 0                      | 3 ( 0.2%)              | 3 ( 0.1%)              |
|                                                                     | not recovered/not resolved | 0                      | 1 (<0.1%)              | 1 (<0.1%)              |
| Vestibular neuritis                                                 | recovered/resolved         | 2 ( 0.1%)              | 0                      | 2 (<0.1%)              |
| Viral infection                                                     | recovered/resolved         | 3 ( 0.2%)              | 3 ( 0.2%)              | 6 ( 0.2%)              |
| Viral pharyngitis                                                   | recovered/resolved         | 1 (<0.1%)              | 1 (<0.1%)              | 2 (<0.1%)              |
| Viral rhinitis                                                      | recovered/resolved         | 1 (<0.1%)              | 0                      | 1 (<0.1%)              |
| Viral upper respiratory tract infection                             | recovered/resolved         | 15 ( 1.0%)             | 14 ( 1.0%)             | 29 ( 1.0%)             |
| Vulval abscess                                                      | recovered/resolved         | 0                      | 1 (<0.1%)              | 1 (<0.1%)              |
| Vulvitis                                                            | recovered/resolved         | 7 ( 0.5%)              | 7 ( 0.5%)              | 14 ( 0.5%)             |
|                                                                     | not recovered/not resolved | 1 (<0.1%)              | 0                      | 1 (<0.1%)              |
| Vulvovaginal candidiasis                                            | recovered/resolved         | 66 ( 4.6%)             | 70 ( 4.8%)             | 136 ( 4.7%)            |
|                                                                     | recovering/resolving       | 0                      | 1 (<0.1%)              | 1 (<0.1%)              |
|                                                                     | not recovered/not resolved | 6 ( 0.4%)              | 1 (<0.1%)              | 7 ( 0.2%)              |
| Vulvovaginal mycotic infection                                      | recovered/resolved         | 94 ( 6.6%)             | 103 ( 7.1%)            | 197 ( 6.8%)            |
|                                                                     | recovering/resolving       | 0                      | 1 (<0.1%)              | 1 (<0.1%)              |
|                                                                     | not recovered/not resolved | 4 ( 0.3%)              | 6 ( 0.4%)              | 10 ( 0.3%)             |
| Vulvovaginitis                                                      | recovered/resolved         | 6 ( 0.4%)              | 5 ( 0.3%)              | 11 ( 0.4%)             |
|                                                                     | not recovered/not resolved | 0                      | 2 ( 0.1%)              | 2 (<0.1%)              |
| Vulvovaginitis chlamydial                                           | recovered/resolved         | 0                      | 1 (<0.1%)              | 1 (<0.1%)              |
| Vulvovaginitis streptococcal                                        | recovered/resolved         | 1 (<0.1%)              | 2 ( 0.1%)              | 3 ( 0.1%)              |

**Table 14.3.1 / 14: Number of subjects with adverse events by outcome, primary system organ class and preferred term (FAS)**

| Primary system organ class                     | Preferred term                 | Maximum Derived AE outcome             | LCS12<br>N=1432 (100%) | LCS16<br>N=1452 (100%) | Total<br>N=2884 (100%) |
|------------------------------------------------|--------------------------------|----------------------------------------|------------------------|------------------------|------------------------|
|                                                | MedDRA version 14.0            |                                        |                        |                        |                        |
|                                                | Vulvovaginitis trichomonal     | recovered/resolved                     | 4 ( 0.3%)              | 4 ( 0.3%)              | 8 ( 0.3%)              |
|                                                | Wound infection                | recovered/resolved                     | 3 ( 0.2%)              | 1 ( <0.1%)             | 4 ( 0.1%)              |
|                                                | Wound infection staphylococcal | recovered/resolved                     | 0                      | 1 ( <0.1%)             | 1 ( <0.1%)             |
| Injury, poisoning and procedural complications |                                | recovered/resolved                     | 141 ( 9.8%)            | 121 ( 8.3%)            | 262 ( 9.1%)            |
|                                                |                                | recovering/resolving                   | 2 ( 0.1%)              | 6 ( 0.4%)              | 8 ( 0.3%)              |
|                                                |                                | not recovered/not resolved             | 5 ( 0.3%)              | 5 ( 0.3%)              | 10 ( 0.3%)             |
|                                                |                                | recovered/resolved with resid. effects | 1 ( <0.1%)             | 0                      | 1 ( <0.1%)             |
|                                                | Abdominal wound dehiscence     | recovering/resolving                   | 0                      | 1 ( <0.1%)             | 1 ( <0.1%)             |
|                                                | Accident                       | recovered/resolved                     | 0                      | 1 ( <0.1%)             | 1 ( <0.1%)             |
|                                                | Animal bite                    | recovered/resolved                     | 3 ( 0.2%)              | 2 ( 0.1%)              | 5 ( 0.2%)              |
|                                                | Ankle fracture                 | recovered/resolved                     | 1 ( <0.1%)             | 2 ( 0.1%)              | 3 ( 0.1%)              |
|                                                | Arthropod bite                 | recovered/resolved                     | 5 ( 0.3%)              | 2 ( 0.1%)              | 7 ( 0.2%)              |
|                                                | Arthropod sting                | recovered/resolved                     | 0                      | 2 ( 0.1%)              | 2 ( <0.1%)             |
|                                                | Back injury                    | not recovered/not resolved             | 0                      | 1 ( <0.1%)             | 1 ( <0.1%)             |
|                                                | Burns second degree            | recovered/resolved                     | 0                      | 1 ( <0.1%)             | 1 ( <0.1%)             |
|                                                | Burns third degree             | recovered/resolved                     | 1 ( <0.1%)             | 0                      | 1 ( <0.1%)             |
|                                                | Cartilage injury               | recovered/resolved                     | 0                      | 1 ( <0.1%)             | 1 ( <0.1%)             |
|                                                | Clavicle fracture              | recovered/resolved                     | 1 ( <0.1%)             | 0                      | 1 ( <0.1%)             |
|                                                | Concussion                     | recovered/resolved                     | 3 ( 0.2%)              | 8 ( 0.6%)              | 11 ( 0.4%)             |
|                                                | Contusion                      | recovered/resolved                     | 7 ( 0.5%)              | 4 ( 0.3%)              | 11 ( 0.4%)             |
|                                                |                                | recovering/resolving                   | 0                      | 1 ( <0.1%)             | 1 ( <0.1%)             |

**Table 14.3.1 / 14: Number of subjects with adverse events by outcome, primary system organ class and preferred term (FAS)**

| Primary system organ class |                                                  | LCS12                    | LCS16          | Total                    |
|----------------------------|--------------------------------------------------|--------------------------|----------------|--------------------------|
| Preferred term             | Maximum Derived AE outcome                       | N=1432 (100%)            | N=1452 (100%)  | N=2884 (100%)            |
| MedDRA version 14.0        |                                                  |                          |                |                          |
| Epicondylitis              | recovered/resolved                               | 2 ( 0.1%)                | 4 ( 0.3%)      | 6 ( 0.2%)                |
| Excoriation                | recovered/resolved                               | 0                        | 1 ( <0.1%)     | 1 ( <0.1%)               |
| Eye injury                 | recovered/resolved                               | 1 ( <0.1%)               | 1 ( <0.1%)     | 2 ( <0.1%)               |
| Facial bones fracture      | recovered/resolved<br>not recovered/not resolved | 1 ( <0.1%)<br>1 ( <0.1%) | 0<br>0         | 1 ( <0.1%)<br>1 ( <0.1%) |
| Fall                       | recovered/resolved                               | 0                        | 1 ( <0.1%)     | 1 ( <0.1%)               |
| Foot fracture              | recovered/resolved                               | 9 ( 0.6%)                | 3 ( 0.2%)      | 12 ( 0.4%)               |
| Forearm fracture           | recovered/resolved with resid. effects           | 1 ( <0.1%)               | 0              | 1 ( <0.1%)               |
| Frostbite                  | recovered/resolved                               | 1 ( <0.1%)               | 0              | 1 ( <0.1%)               |
| Hand fracture              | recovered/resolved<br>not recovered/not resolved | 0<br>1 ( <0.1%)          | 3 ( 0.2%)<br>0 | 3 ( 0.1%)<br>1 ( <0.1%)  |
| Head injury                | recovered/resolved                               | 1 ( <0.1%)               | 1 ( <0.1%)     | 2 ( <0.1%)               |
| Humerus fracture           | recovered/resolved                               | 0                        | 1 ( <0.1%)     | 1 ( <0.1%)               |
| Injury                     | recovered/resolved                               | 0                        | 1 ( <0.1%)     | 1 ( <0.1%)               |
| Joint dislocation          | recovered/resolved                               | 5 ( 0.3%)                | 1 ( <0.1%)     | 6 ( 0.2%)                |
| Joint injury               | Continuing with change<br>recovered/resolved     | 1 ( <0.1%)<br>6 ( 0.4%)  | 0<br>6 ( 0.4%) | 1 ( <0.1%)<br>12 ( 0.4%) |
| Joint sprain               | recovered/resolved<br>not recovered/not resolved | 11 ( 0.8%)<br>2 ( 0.1%)  | 6 ( 0.4%)<br>0 | 17 ( 0.6%)<br>2 ( <0.1%) |
| Laceration                 | recovered/resolved                               | 3 ( 0.2%)                | 2 ( 0.1%)      | 5 ( 0.2%)                |
| Laryngeal injury           | recovered/resolved                               | 1 ( <0.1%)               | 0              | 1 ( <0.1%)               |

**Table 14.3.1 / 14: Number of subjects with adverse events by outcome, primary system organ class and preferred term (FAS)**

| Primary system organ class<br>Preferred term<br>MedDRA version 14.0 | Maximum Derived AE outcome                                               | LCS12<br>N=1432 (100%)       | LCS16<br>N=1452 (100%)               | Total<br>N=2884 (100%)                 |
|---------------------------------------------------------------------|--------------------------------------------------------------------------|------------------------------|--------------------------------------|----------------------------------------|
| Ligament rupture                                                    | recovered/resolved                                                       | 3 ( 0.2%)                    | 1 ( <0.1%)                           | 4 ( 0.1%)                              |
| Ligament sprain                                                     | recovered/resolved                                                       | 0                            | 1 ( <0.1%)                           | 1 ( <0.1%)                             |
| Limb crushing injury                                                | recovered/resolved                                                       | 1 ( <0.1%)                   | 0                                    | 1 ( <0.1%)                             |
| Limb injury                                                         | recovered/resolved                                                       | 1 ( <0.1%)                   | 4 ( 0.3%)                            | 5 ( 0.2%)                              |
| Lower limb fracture                                                 | recovered/resolved                                                       | 1 ( <0.1%)                   | 0                                    | 1 ( <0.1%)                             |
| Lumbar vertebral fracture                                           | recovering/resolving                                                     | 0                            | 1 ( <0.1%)                           | 1 ( <0.1%)                             |
| Meniscus lesion                                                     | recovered/resolved                                                       | 3 ( 0.2%)                    | 0                                    | 3 ( 0.1%)                              |
| Muscle injury                                                       | recovered/resolved<br>not recovered/not resolved                         | 4 ( 0.3%)<br>1 ( <0.1%)      | 2 ( 0.1%)<br>0                       | 6 ( 0.2%)<br>1 ( <0.1%)                |
| Muscle rupture                                                      | recovered/resolved                                                       | 0                            | 1 ( <0.1%)                           | 1 ( <0.1%)                             |
| Muscle strain                                                       | recovered/resolved<br>recovering/resolving<br>not recovered/not resolved | 6 ( 0.4%)<br>1 ( <0.1%)<br>0 | 7 ( 0.5%)<br>1 ( <0.1%)<br>2 ( 0.1%) | 13 ( 0.5%)<br>2 ( <0.1%)<br>2 ( <0.1%) |
| Nail avulsion                                                       | recovered/resolved                                                       | 1 ( <0.1%)                   | 0                                    | 1 ( <0.1%)                             |
| Overdose                                                            | recovering/resolving                                                     | 1 ( <0.1%)                   | 0                                    | 1 ( <0.1%)                             |
| Post concussion syndrome                                            | recovering/resolving                                                     | 0                            | 1 ( <0.1%)                           | 1 ( <0.1%)                             |
| Post procedural haemorrhage                                         | recovered/resolved                                                       | 2 ( 0.1%)                    | 2 ( 0.1%)                            | 4 ( 0.1%)                              |
| Post-traumatic pain                                                 | recovered/resolved<br>not recovered/not resolved                         | 2 ( 0.1%)<br>1 ( <0.1%)      | 4 ( 0.3%)<br>0                       | 6 ( 0.2%)<br>1 ( <0.1%)                |
| Postoperative ileus                                                 | recovered/resolved                                                       | 0                            | 1 ( <0.1%)                           | 1 ( <0.1%)                             |

**Table 14.3.1 / 14: Number of subjects with adverse events by outcome, primary system organ class and preferred term (FAS)**

| Primary system organ class<br>Preferred term<br>MedDRA version 14.0 | Maximum Derived AE outcome | LCS12<br>N=1432 (100%) | LCS16<br>N=1452 (100%) | Total<br>N=2884 (100%) |
|---------------------------------------------------------------------|----------------------------|------------------------|------------------------|------------------------|
| Procedural pain                                                     | recovered/resolved         | 58 ( 4.1%)             | 51 ( 3.5%)             | 109 ( 3.8%)            |
|                                                                     | recovering/resolving       | 0                      | 1 (<0.1%)              | 1 (<0.1%)              |
|                                                                     | not recovered/not resolved | 0                      | 1 (<0.1%)              | 1 (<0.1%)              |
| Procedural vomiting                                                 | recovered/resolved         | 1 (<0.1%)              | 0                      | 1 (<0.1%)              |
| Radius fracture                                                     | recovered/resolved         | 1 (<0.1%)              | 1 (<0.1%)              | 2 (<0.1%)              |
| Rib fracture                                                        | recovered/resolved         | 1 (<0.1%)              | 2 ( 0.1%)              | 3 ( 0.1%)              |
| Road traffic accident                                               | recovered/resolved         | 3 ( 0.2%)              | 2 ( 0.1%)              | 5 ( 0.2%)              |
| Seroma                                                              | recovered/resolved         | 1 (<0.1%)              | 0                      | 1 (<0.1%)              |
| Shunt occlusion                                                     | recovered/resolved         | 1 (<0.1%)              | 0                      | 1 (<0.1%)              |
| Skeletal injury                                                     | recovered/resolved         | 0                      | 1 (<0.1%)              | 1 (<0.1%)              |
| Skin injury                                                         | recovered/resolved         | 0                      | 1 (<0.1%)              | 1 (<0.1%)              |
| Spinal column injury                                                | recovered/resolved         | 0                      | 2 ( 0.1%)              | 2 (<0.1%)              |
| Stress fracture                                                     | recovered/resolved         | 0                      | 1 (<0.1%)              | 1 (<0.1%)              |
| Subdural haematoma                                                  | recovered/resolved         | 1 (<0.1%)              | 0                      | 1 (<0.1%)              |
| Tendon injury                                                       | recovered/resolved         | 0                      | 1 (<0.1%)              | 1 (<0.1%)              |
| Tendon rupture                                                      | recovered/resolved         | 3 ( 0.2%)              | 1 (<0.1%)              | 4 ( 0.1%)              |
| Thermal burn                                                        | recovered/resolved         | 0                      | 3 ( 0.2%)              | 3 ( 0.1%)              |
| Tibia fracture                                                      | recovered/resolved         | 1 (<0.1%)              | 1 (<0.1%)              | 2 (<0.1%)              |
| Traumatic fracture                                                  | recovered/resolved         | 1 (<0.1%)              | 0                      | 1 (<0.1%)              |

**Table 14.3.1 / 14: Number of subjects with adverse events by outcome, primary system organ class and preferred term (FAS)**

| Primary system organ class                        | Preferred term                         | Maximum Derived AE outcome | LCS12<br>N=1432 (100%) | LCS16<br>N=1452 (100%) | Total<br>N=2884 (100%) |
|---------------------------------------------------|----------------------------------------|----------------------------|------------------------|------------------------|------------------------|
| MedDRA version 14.0                               | Upper limb fracture                    | recovered/resolved         | 1 ( <0.1%)             | 1 ( <0.1%)             | 2 ( <0.1%)             |
|                                                   |                                        | not recovered/not resolved | 0                      | 1 ( <0.1%)             | 1 ( <0.1%)             |
|                                                   | Vulval laceration                      | recovered/resolved         | 0                      | 1 ( <0.1%)             | 1 ( <0.1%)             |
|                                                   | Whiplash injury                        | recovered/resolved         | 1 ( <0.1%)             | 5 ( 0.3%)              | 6 ( 0.2%)              |
|                                                   | Wound                                  | recovered/resolved         | 1 ( <0.1%)             | 0                      | 1 ( <0.1%)             |
| Wrist fracture                                    | recovered/resolved                     | 0                          | 1 ( <0.1%)             | 1 ( <0.1%)             |                        |
|                                                   | recovering/resolving                   | 0                          | 1 ( <0.1%)             | 1 ( <0.1%)             |                        |
| Investigations                                    | recovered/resolved                     | 65 ( 4.5%)                 | 60 ( 4.1%)             | 125 ( 4.3%)            |                        |
|                                                   | recovering/resolving                   | 5 ( 0.3%)                  | 6 ( 0.4%)              | 11 ( 0.4%)             |                        |
|                                                   | not recovered/not resolved             | 68 ( 4.7%)                 | 79 ( 5.4%)             | 147 ( 5.1%)            |                        |
|                                                   | recovered/resolved with resid. effects | 0                          | 1 ( <0.1%)             | 1 ( <0.1%)             |                        |
| Alanine aminotransferase increased                | recovered/resolved                     | 3 ( 0.2%)                  | 5 ( 0.3%)              | 8 ( 0.3%)              |                        |
|                                                   | not recovered/not resolved             | 5 ( 0.3%)                  | 5 ( 0.3%)              | 10 ( 0.3%)             |                        |
| Antibiotic resistant Staphylococcus test positive | recovered/resolved                     | 2 ( 0.1%)                  | 0                      | 2 ( <0.1%)             |                        |
| Aspartate aminotransferase increased              | recovered/resolved                     | 2 ( 0.1%)                  | 2 ( 0.1%)              | 4 ( 0.1%)              |                        |
|                                                   | not recovered/not resolved             | 3 ( 0.2%)                  | 2 ( 0.1%)              | 5 ( 0.2%)              |                        |
| Biopsy muscle                                     | recovered/resolved                     | 1 ( <0.1%)                 | 0                      | 1 ( <0.1%)             |                        |
| Blood alkaline phosphatase decreased              | not recovered/not resolved             | 1 ( <0.1%)                 | 0                      | 1 ( <0.1%)             |                        |
| Blood amylase increased                           | not recovered/not resolved             | 0                          | 1 ( <0.1%)             | 1 ( <0.1%)             |                        |
| Blood cholesterol increased                       | recovered/resolved                     | 2 ( 0.1%)                  | 0                      | 2 ( <0.1%)             |                        |
|                                                   | not recovered/not resolved             | 1 ( <0.1%)                 | 1 ( <0.1%)             | 2 ( <0.1%)             |                        |
| Blood iron decreased                              | not recovered/not resolved             | 0                          | 1 ( <0.1%)             | 1 ( <0.1%)             |                        |
| Blood pressure diastolic increased                | recovering/resolving                   | 0                          | 1 ( <0.1%)             | 1 ( <0.1%)             |                        |

**Table 14.3.1 / 14: Number of subjects with adverse events by outcome, primary system organ class and preferred term (FAS)**

| Primary system organ class          | Preferred term                     | Maximum Derived AE outcome             | LCS12<br>N=1432 (100%) | LCS16<br>N=1452 (100%) | Total<br>N=2884 (100%) |
|-------------------------------------|------------------------------------|----------------------------------------|------------------------|------------------------|------------------------|
| MedDRA version 14.0                 | Blood pressure increased           | recovered/resolved                     | 2 ( 0.1%)              | 1 ( <0.1%)             | 3 ( 0.1%)              |
|                                     |                                    | not recovered/not resolved             | 1 ( <0.1%)             | 0                      | 1 ( <0.1%)             |
|                                     | Blood pressure systolic increased  | recovered/resolved                     | 0                      | 1 ( <0.1%)             | 1 ( <0.1%)             |
|                                     | Blood sodium decreased             | not recovered/not resolved             | 1 ( <0.1%)             | 0                      | 1 ( <0.1%)             |
| Blood triglycerides increased       |                                    | recovered/resolved                     | 1 ( <0.1%)             | 1 ( <0.1%)             | 2 ( <0.1%)             |
|                                     |                                    | recovering/resolving                   | 0                      | 1 ( <0.1%)             | 1 ( <0.1%)             |
|                                     |                                    | not recovered/not resolved             | 0                      | 3 ( 0.2%)              | 3 ( 0.1%)              |
| Blood urine present                 |                                    | recovered/resolved                     | 1 ( <0.1%)             | 1 ( <0.1%)             | 2 ( <0.1%)             |
|                                     |                                    | not recovered/not resolved             | 2 ( 0.1%)              | 0                      | 2 ( <0.1%)             |
|                                     | Carbohydrate antigen 125 increased | recovered/resolved                     | 1 ( <0.1%)             | 0                      | 1 ( <0.1%)             |
|                                     | Cardiac murmur                     | not recovered/not resolved             | 1 ( <0.1%)             | 0                      | 1 ( <0.1%)             |
|                                     | Chlamydia test positive            | recovered/resolved                     | 7 ( 0.5%)              | 1 ( <0.1%)             | 8 ( 0.3%)              |
|                                     | Escherichia test positive          | recovered/resolved                     | 1 ( <0.1%)             | 0                      | 1 ( <0.1%)             |
| Gamma-glutamyltransferase increased |                                    | recovered/resolved                     | 1 ( <0.1%)             | 1 ( <0.1%)             | 2 ( <0.1%)             |
|                                     |                                    | recovering/resolving                   | 1 ( <0.1%)             | 0                      | 1 ( <0.1%)             |
|                                     |                                    | not recovered/not resolved             | 2 ( 0.1%)              | 9 ( 0.6%)              | 11 ( 0.4%)             |
|                                     |                                    | recovered/resolved with resid. effects | 0                      | 1 ( <0.1%)             | 1 ( <0.1%)             |
|                                     | Gastric pH decreased               | recovered/resolved                     | 0                      | 1 ( <0.1%)             | 1 ( <0.1%)             |
|                                     | Glucose urine present              | not recovered/not resolved             | 0                      | 1 ( <0.1%)             | 1 ( <0.1%)             |
|                                     | Glycosylated haemoglobin increased | not recovered/not resolved             | 5 ( 0.3%)              | 0                      | 5 ( 0.2%)              |
|                                     | Haematocrit decreased              | recovering/resolving                   | 0                      | 1 ( <0.1%)             | 1 ( <0.1%)             |
|                                     | Haematocrit increased              | not recovered/not resolved             | 2 ( 0.1%)              | 2 ( 0.1%)              | 4 ( 0.1%)              |



**Table 14.3.1 / 14: Number of subjects with adverse events by outcome, primary system organ class and preferred term (FAS)**

| Primary system organ class<br>Preferred term<br>MedDRA version 14.0 | Maximum Derived AE outcome | LCS12<br>N=1432 (100%) | LCS16<br>N=1452 (100%) | Total<br>N=2884 (100%) |
|---------------------------------------------------------------------|----------------------------|------------------------|------------------------|------------------------|
| Haemoglobin decreased                                               | recovered/resolved         | 2 ( 0.1%)              | 2 ( 0.1%)              | 4 ( 0.1%)              |
|                                                                     | recovering/resolving       | 0                      | 1 (<0.1%)              | 1 (<0.1%)              |
|                                                                     | not recovered/not resolved | 2 ( 0.1%)              | 2 ( 0.1%)              | 4 ( 0.1%)              |
| Heart rate increased                                                | recovered/resolved         | 0                      | 1 (<0.1%)              | 1 (<0.1%)              |
| Hepatic enzyme increased                                            | recovered/resolved         | 0                      | 1 (<0.1%)              | 1 (<0.1%)              |
|                                                                     | not recovered/not resolved | 1 (<0.1%)              | 0                      | 1 (<0.1%)              |
| High density lipoprotein decreased                                  | recovered/resolved         | 0                      | 1 (<0.1%)              | 1 (<0.1%)              |
|                                                                     | not recovered/not resolved | 3 ( 0.2%)              | 5 ( 0.3%)              | 8 ( 0.3%)              |
| High density lipoprotein increased                                  | not recovered/not resolved | 0                      | 1 (<0.1%)              | 1 (<0.1%)              |
| Human papilloma virus test positive                                 | recovered/resolved         | 2 ( 0.1%)              | 4 ( 0.3%)              | 6 ( 0.2%)              |
|                                                                     | recovering/resolving       | 1 (<0.1%)              | 1 (<0.1%)              | 2 (<0.1%)              |
|                                                                     | not recovered/not resolved | 2 ( 0.1%)              | 0                      | 2 (<0.1%)              |
| Liver function test abnormal                                        | recovered/resolved         | 0                      | 1 (<0.1%)              | 1 (<0.1%)              |
|                                                                     | not recovered/not resolved | 0                      | 1 (<0.1%)              | 1 (<0.1%)              |
| Low density lipoprotein increased                                   | not recovered/not resolved | 1 (<0.1%)              | 1 (<0.1%)              | 2 (<0.1%)              |
| Neisseria test positive                                             | recovered/resolved         | 2 ( 0.1%)              | 0                      | 2 (<0.1%)              |
| Platelet count decreased                                            | recovered/resolved         | 0                      | 1 (<0.1%)              | 1 (<0.1%)              |
|                                                                     | not recovered/not resolved | 2 ( 0.1%)              | 2 ( 0.1%)              | 4 ( 0.1%)              |
| Protein total decreased                                             | not recovered/not resolved | 0                      | 1 (<0.1%)              | 1 (<0.1%)              |
| Protein urine present                                               | recovered/resolved         | 0                      | 1 (<0.1%)              | 1 (<0.1%)              |
|                                                                     | not recovered/not resolved | 1 (<0.1%)              | 0                      | 1 (<0.1%)              |
| Red blood cell count decreased                                      | recovering/resolving       | 0                      | 1 (<0.1%)              | 1 (<0.1%)              |
|                                                                     | not recovered/not resolved | 0                      | 1 (<0.1%)              | 1 (<0.1%)              |
| Red blood cell count increased                                      | not recovered/not resolved | 1 (<0.1%)              | 0                      | 1 (<0.1%)              |

**Table 14.3.1 / 14: Number of subjects with adverse events by outcome, primary system organ class and preferred term (FAS)**

| Primary system organ class         |                            | LCS12         | LCS16         | Total         |
|------------------------------------|----------------------------|---------------|---------------|---------------|
| Preferred term                     | Maximum Derived AE outcome | N=1432 (100%) | N=1452 (100%) | N=2884 (100%) |
| Simplex virus test positive        | recovered/resolved         | 1 ( <0.1%)    | 0             | 1 ( <0.1%)    |
|                                    | not recovered/not resolved | 0             | 1 ( <0.1%)    | 1 ( <0.1%)    |
| Smear cervix abnormal              | recovered/resolved         | 11 ( 0.8%)    | 21 ( 1.4%)    | 32 ( 1.1%)    |
|                                    | recovering/resolving       | 2 ( 0.1%)     | 0             | 2 ( <0.1%)    |
|                                    | not recovered/not resolved | 5 ( 0.3%)     | 4 ( 0.3%)     | 9 ( 0.3%)     |
| Streptococcus test positive        | recovered/resolved         | 1 ( <0.1%)    | 0             | 1 ( <0.1%)    |
| Ultrasound ovary abnormal          | recovered/resolved         | 1 ( <0.1%)    | 0             | 1 ( <0.1%)    |
| Urine leukocyte esterase positive  | recovered/resolved         | 0             | 1 ( <0.1%)    | 1 ( <0.1%)    |
| Vitamin D decreased                | recovered/resolved         | 0             | 1 ( <0.1%)    | 1 ( <0.1%)    |
| Weight decreased                   | recovered/resolved         | 7 ( 0.5%)     | 5 ( 0.3%)     | 12 ( 0.4%)    |
|                                    | recovering/resolving       | 1 ( <0.1%)    | 0             | 1 ( <0.1%)    |
|                                    | not recovered/not resolved | 1 ( <0.1%)    | 2 ( 0.1%)     | 3 ( 0.1%)     |
| Weight increased                   | recovered/resolved         | 21 ( 1.5%)    | 17 ( 1.2%)    | 38 ( 1.3%)    |
|                                    | recovering/resolving       | 0             | 2 ( 0.1%)     | 2 ( <0.1%)    |
|                                    | not recovered/not resolved | 28 ( 2.0%)    | 43 ( 3.0%)    | 71 ( 2.5%)    |
| White blood cell count decreased   | recovered/resolved         | 1 ( <0.1%)    | 2 ( 0.1%)     | 3 ( 0.1%)     |
|                                    | recovering/resolving       | 1 ( <0.1%)    | 0             | 1 ( <0.1%)    |
|                                    | not recovered/not resolved | 1 ( <0.1%)    | 0             | 1 ( <0.1%)    |
| White blood cell count increased   | recovered/resolved         | 1 ( <0.1%)    | 0             | 1 ( <0.1%)    |
|                                    | not recovered/not resolved | 4 ( 0.3%)     | 2 ( 0.1%)     | 6 ( 0.2%)     |
| White blood cells urine positive   | recovered/resolved         | 3 ( 0.2%)     | 1 ( <0.1%)    | 4 ( 0.1%)     |
|                                    | not recovered/not resolved | 0             | 1 ( <0.1%)    | 1 ( <0.1%)    |
| Metabolism and nutrition disorders | recovered/resolved         | 10 ( 0.7%)    | 8 ( 0.6%)     | 18 ( 0.6%)    |
|                                    | recovering/resolving       | 0             | 3 ( 0.2%)     | 3 ( 0.1%)     |
|                                    | not recovered/not resolved | 7 ( 0.5%)     | 5 ( 0.3%)     | 12 ( 0.4%)    |
| Abnormal loss of weight            | recovered/resolved         | 0             | 1 ( <0.1%)    | 1 ( <0.1%)    |

**Table 14.3.1 / 14: Number of subjects with adverse events by outcome, primary system organ class and preferred term (FAS)**

| Primary system organ class<br>Preferred term<br>MedDRA version 14.0 | Maximum Derived AE outcome | LCS12<br>N=1432 (100%) | LCS16<br>N=1452 (100%) | Total<br>N=2884 (100%) |
|---------------------------------------------------------------------|----------------------------|------------------------|------------------------|------------------------|
| Abnormal weight gain                                                | recovering/resolving       | 0                      | 1 ( <0.1%)             | 1 ( <0.1%)             |
| Cell death                                                          | recovered/resolved         | 1 ( <0.1%)             | 0                      | 1 ( <0.1%)             |
| Cholesterosis                                                       | recovered/resolved         | 1 ( <0.1%)             | 0                      | 1 ( <0.1%)             |
| Decreased appetite                                                  | recovered/resolved         | 2 ( 0.1%)              | 1 ( <0.1%)             | 3 ( 0.1%)              |
| Dehydration                                                         | recovered/resolved         | 0                      | 2 ( 0.1%)              | 2 ( <0.1%)             |
| Diabetic ketoacidosis                                               | recovered/resolved         | 0                      | 1 ( <0.1%)             | 1 ( <0.1%)             |
| Dyslipidaemia                                                       | not recovered/not resolved | 0                      | 1 ( <0.1%)             | 1 ( <0.1%)             |
| Fluid retention                                                     | recovered/resolved         | 1 ( <0.1%)             | 1 ( <0.1%)             | 2 ( <0.1%)             |
|                                                                     | recovering/resolving       | 0                      | 1 ( <0.1%)             | 1 ( <0.1%)             |
|                                                                     | not recovered/not resolved | 1 ( <0.1%)             | 0                      | 1 ( <0.1%)             |
| Glucose tolerance impaired                                          | not recovered/not resolved | 1 ( <0.1%)             | 0                      | 1 ( <0.1%)             |
| Hypokalaemia                                                        | recovered/resolved         | 2 ( 0.1%)              | 0                      | 2 ( <0.1%)             |
| Hyponatraemia                                                       | recovered/resolved         | 1 ( <0.1%)             | 0                      | 1 ( <0.1%)             |
| Increased appetite                                                  | recovered/resolved         | 1 ( <0.1%)             | 1 ( <0.1%)             | 2 ( <0.1%)             |
|                                                                     | recovering/resolving       | 0                      | 1 ( <0.1%)             | 1 ( <0.1%)             |
| Insulin resistance                                                  | not recovered/not resolved | 2 ( 0.1%)              | 1 ( <0.1%)             | 3 ( 0.1%)              |
| Lactose intolerance                                                 | recovered/resolved         | 1 ( <0.1%)             | 0                      | 1 ( <0.1%)             |
|                                                                     | not recovered/not resolved | 1 ( <0.1%)             | 0                      | 1 ( <0.1%)             |
| Obesity                                                             | recovered/resolved         | 0                      | 1 ( <0.1%)             | 1 ( <0.1%)             |
| Overweight                                                          | not recovered/not resolved | 0                      | 1 ( <0.1%)             | 1 ( <0.1%)             |
| Type 2 diabetes mellitus                                            | not recovered/not resolved | 1 ( <0.1%)             | 0                      | 1 ( <0.1%)             |

**Table 14.3.1 / 14: Number of subjects with adverse events by outcome, primary system organ class and preferred term (FAS)**

| Primary system organ class                      | Preferred term         | Maximum Derived AE outcome             | LCS12<br>N=1432 (100%) | LCS16<br>N=1452 (100%) | Total<br>N=2884 (100%) |
|-------------------------------------------------|------------------------|----------------------------------------|------------------------|------------------------|------------------------|
| MedDRA version 14.0                             | Vitamin B12 deficiency | recovered/resolved                     | 1 ( <0.1%)             | 0                      | 1 ( <0.1%)             |
|                                                 |                        | not recovered/not resolved             | 0                      | 1 ( <0.1%)             | 1 ( <0.1%)             |
|                                                 | Vitamin D deficiency   | not recovered/not resolved             | 1 ( <0.1%)             | 1 ( <0.1%)             | 2 ( <0.1%)             |
|                                                 | Weight fluctuation     | recovered/resolved                     | 0                      | 1 ( <0.1%)             | 1 ( <0.1%)             |
| Musculoskeletal and connective tissue disorders |                        | recovered/resolved                     | 102 ( 7.1%)            | 141 ( 9.7%)            | 243 ( 8.4%)            |
|                                                 |                        | recovering/resolving                   | 4 ( 0.3%)              | 5 ( 0.3%)              | 9 ( 0.3%)              |
|                                                 |                        | not recovered/not resolved             | 33 ( 2.3%)             | 36 ( 2.5%)             | 69 ( 2.4%)             |
|                                                 |                        | recovered/resolved with resid. effects | 0                      | 1 ( <0.1%)             | 1 ( <0.1%)             |
|                                                 | Ankylosing spondylitis | not recovered/not resolved             | 1 ( <0.1%)             | 0                      | 1 ( <0.1%)             |
|                                                 | Arthralgia             | recovered/resolved                     | 16 ( 1.1%)             | 25 ( 1.7%)             | 41 ( 1.4%)             |
|                                                 |                        | not recovered/not resolved             | 5 ( 0.3%)              | 6 ( 0.4%)              | 11 ( 0.4%)             |
|                                                 | Arthritis              | recovered/resolved                     | 0                      | 3 ( 0.2%)              | 3 ( 0.1%)              |
|                                                 |                        | not recovered/not resolved             | 1 ( <0.1%)             | 2 ( 0.1%)              | 3 ( 0.1%)              |
|                                                 | Axillary mass          | recovered/resolved                     | 0                      | 1 ( <0.1%)             | 1 ( <0.1%)             |
|                                                 | Back pain              | recovered/resolved                     | 41 ( 2.9%)             | 51 ( 3.5%)             | 92 ( 3.2%)             |
|                                                 |                        | recovering/resolving                   | 1 ( <0.1%)             | 2 ( 0.1%)              | 3 ( 0.1%)              |
|                                                 |                        | not recovered/not resolved             | 15 ( 1.0%)             | 11 ( 0.8%)             | 26 ( 0.9%)             |
|                                                 | Bone pain              | recovered/resolved                     | 1 ( <0.1%)             | 3 ( 0.2%)              | 4 ( 0.1%)              |
|                                                 | Bursitis               | recovered/resolved                     | 1 ( <0.1%)             | 1 ( <0.1%)             | 2 ( <0.1%)             |
|                                                 |                        | not recovered/not resolved             | 1 ( <0.1%)             | 0                      | 1 ( <0.1%)             |
|                                                 | Compartment syndrome   | recovered/resolved                     | 0                      | 1 ( <0.1%)             | 1 ( <0.1%)             |
|                                                 | Costochondritis        | recovered/resolved                     | 2 ( 0.1%)              | 1 ( <0.1%)             | 3 ( 0.1%)              |
|                                                 |                        | not recovered/not resolved             | 1 ( <0.1%)             | 0                      | 1 ( <0.1%)             |
|                                                 | Exostosis              | recovered/resolved                     | 0                      | 3 ( 0.2%)              | 3 ( 0.1%)              |
|                                                 |                        | not recovered/not resolved             | 1 ( <0.1%)             | 0                      | 1 ( <0.1%)             |

**Table 14.3.1 / 14: Number of subjects with adverse events by outcome, primary system organ class and preferred term (FAS)**

| Primary system organ class<br>Preferred term<br>MedDRA version 14.0 | Maximum Derived AE outcome             | LCS12<br>N=1432 (100%) | LCS16<br>N=1452 (100%) | Total<br>N=2884 (100%) |
|---------------------------------------------------------------------|----------------------------------------|------------------------|------------------------|------------------------|
| Fibromyalgia                                                        | not recovered/not resolved             | 0                      | 2 ( 0.1%)              | 2 ( <0.1%)             |
| Flank pain                                                          | recovered/resolved                     | 2 ( 0.1%)              | 3 ( 0.2%)              | 5 ( 0.2%)              |
| Groin pain                                                          | recovered/resolved                     | 2 ( 0.1%)              | 4 ( 0.3%)              | 6 ( 0.2%)              |
| Hand deformity                                                      | recovered/resolved                     | 0                      | 1 ( <0.1%)             | 1 ( <0.1%)             |
| Intervertebral disc disorder                                        | recovered/resolved                     | 1 ( <0.1%)             | 1 ( <0.1%)             | 2 ( <0.1%)             |
| Intervertebral disc protrusion                                      | recovered/resolved                     | 0                      | 1 ( <0.1%)             | 1 ( <0.1%)             |
|                                                                     | not recovered/not resolved             | 1 ( <0.1%)             | 2 ( 0.1%)              | 3 ( 0.1%)              |
| Joint effusion                                                      | recovered/resolved                     | 1 ( <0.1%)             | 0                      | 1 ( <0.1%)             |
| Joint instability                                                   | recovered/resolved                     | 1 ( <0.1%)             | 0                      | 1 ( <0.1%)             |
|                                                                     | recovering/resolving                   | 0                      | 1 ( <0.1%)             | 1 ( <0.1%)             |
| Joint stiffness                                                     | not recovered/not resolved             | 0                      | 1 ( <0.1%)             | 1 ( <0.1%)             |
| Joint swelling                                                      | recovered/resolved                     | 0                      | 1 ( <0.1%)             | 1 ( <0.1%)             |
| Loose body in joint                                                 | recovered/resolved with resid. effects | 0                      | 1 ( <0.1%)             | 1 ( <0.1%)             |
| Medial tibial stress syndrome                                       | recovered/resolved                     | 1 ( <0.1%)             | 2 ( 0.1%)              | 3 ( 0.1%)              |
|                                                                     | recovering/resolving                   | 1 ( <0.1%)             | 0                      | 1 ( <0.1%)             |
| Muscle contracture                                                  | recovered/resolved                     | 1 ( <0.1%)             | 2 ( 0.1%)              | 3 ( 0.1%)              |
| Muscle spasms                                                       | recovered/resolved                     | 5 ( 0.3%)              | 7 ( 0.5%)              | 12 ( 0.4%)             |
|                                                                     | not recovered/not resolved             | 0                      | 1 ( <0.1%)             | 1 ( <0.1%)             |
| Muscle tightness                                                    | recovered/resolved                     | 6 ( 0.4%)              | 6 ( 0.4%)              | 12 ( 0.4%)             |
|                                                                     | not recovered/not resolved             | 2 ( 0.1%)              | 4 ( 0.3%)              | 6 ( 0.2%)              |
| Musculoskeletal chest pain                                          | recovered/resolved                     | 0                      | 2 ( 0.1%)              | 2 ( <0.1%)             |
|                                                                     | not recovered/not resolved             | 2 ( 0.1%)              | 0                      | 2 ( <0.1%)             |

**Table 14.3.1 / 14: Number of subjects with adverse events by outcome, primary system organ class and preferred term (FAS)**

| Primary system organ class<br>Preferred term<br>MedDRA version 14.0 | Maximum Derived AE outcome | LCS12<br>N=1432 (100%) | LCS16<br>N=1452 (100%) | Total<br>N=2884 (100%) |
|---------------------------------------------------------------------|----------------------------|------------------------|------------------------|------------------------|
| Musculoskeletal discomfort                                          | recovered/resolved         | 0                      | 1 ( <0.1%)             | 1 ( <0.1%)             |
| Musculoskeletal pain                                                | recovered/resolved         | 5 ( 0.3%)              | 10 ( 0.7%)             | 15 ( 0.5%)             |
|                                                                     | not recovered/not resolved | 2 ( 0.1%)              | 0                      | 2 ( <0.1%)             |
| Musculoskeletal stiffness                                           | recovered/resolved         | 0                      | 1 ( <0.1%)             | 1 ( <0.1%)             |
| Myalgia                                                             | recovered/resolved         | 7 ( 0.5%)              | 11 ( 0.8%)             | 18 ( 0.6%)             |
|                                                                     | recovering/resolving       | 1 ( <0.1%)             | 1 ( <0.1%)             | 2 ( <0.1%)             |
|                                                                     | not recovered/not resolved | 1 ( <0.1%)             | 0                      | 1 ( <0.1%)             |
| Myositis                                                            | recovered/resolved         | 0                      | 1 ( <0.1%)             | 1 ( <0.1%)             |
| Neck pain                                                           | recovered/resolved         | 12 ( 0.8%)             | 9 ( 0.6%)              | 21 ( 0.7%)             |
| Osteitis                                                            | recovered/resolved         | 2 ( 0.1%)              | 0                      | 2 ( <0.1%)             |
| Osteoarthritis                                                      | not recovered/not resolved | 0                      | 2 ( 0.1%)              | 2 ( <0.1%)             |
| Osteochondrosis                                                     | recovered/resolved         | 0                      | 2 ( 0.1%)              | 2 ( <0.1%)             |
| Osteopenia                                                          | not recovered/not resolved | 0                      | 1 ( <0.1%)             | 1 ( <0.1%)             |
| Pain in extremity                                                   | recovered/resolved         | 6 ( 0.4%)              | 11 ( 0.8%)             | 17 ( 0.6%)             |
|                                                                     | recovering/resolving       | 0                      | 1 ( <0.1%)             | 1 ( <0.1%)             |
|                                                                     | not recovered/not resolved | 0                      | 3 ( 0.2%)              | 3 ( 0.1%)              |
| Pain in jaw                                                         | recovered/resolved         | 0                      | 1 ( <0.1%)             | 1 ( <0.1%)             |
| Patellofemoral pain syndrome                                        | not recovered/not resolved | 1 ( <0.1%)             | 0                      | 1 ( <0.1%)             |
| Plantar fasciitis                                                   | recovered/resolved         | 0                      | 1 ( <0.1%)             | 1 ( <0.1%)             |
| Psoriatic arthropathy                                               | recovering/resolving       | 1 ( <0.1%)             | 0                      | 1 ( <0.1%)             |
| Rotator cuff syndrome                                               | recovered/resolved         | 1 ( <0.1%)             | 4 ( 0.3%)              | 5 ( 0.2%)              |
|                                                                     | not recovered/not resolved | 0                      | 2 ( 0.1%)              | 2 ( <0.1%)             |

**Table 14.3.1 / 14: Number of subjects with adverse events by outcome, primary system organ class and preferred term (FAS)**

| Primary system organ class<br>Preferred term<br>MedDRA version 14.0    | Maximum Derived AE outcome             | LCS12<br>N=1432 (100%) | LCS16<br>N=1452 (100%) | Total<br>N=2884 (100%) |
|------------------------------------------------------------------------|----------------------------------------|------------------------|------------------------|------------------------|
| Scleroderma                                                            | recovered/resolved                     | 1 ( <0.1%)             | 0                      | 1 ( <0.1%)             |
| Sensation of heaviness                                                 | recovered/resolved                     | 0                      | 1 ( <0.1%)             | 1 ( <0.1%)             |
| Spinal osteoarthritis                                                  | recovered/resolved                     | 1 ( <0.1%)             | 0                      | 1 ( <0.1%)             |
| Synovitis                                                              | recovered/resolved                     | 1 ( <0.1%)             | 0                      | 1 ( <0.1%)             |
| Temporomandibular joint syndrome                                       | recovered/resolved                     | 1 ( <0.1%)             | 0                      | 1 ( <0.1%)             |
|                                                                        | not recovered/not resolved             | 0                      | 1 ( <0.1%)             | 1 ( <0.1%)             |
| Tendon pain                                                            | recovered/resolved                     | 1 ( <0.1%)             | 1 ( <0.1%)             | 2 ( <0.1%)             |
| Tendonitis                                                             | recovered/resolved                     | 4 ( 0.3%)              | 2 ( 0.1%)              | 6 ( 0.2%)              |
|                                                                        | not recovered/not resolved             | 1 ( <0.1%)             | 2 ( 0.1%)              | 3 ( 0.1%)              |
| Tenosynovitis                                                          | recovered/resolved                     | 0                      | 1 ( <0.1%)             | 1 ( <0.1%)             |
| Torticollis                                                            | recovered/resolved                     | 1 ( <0.1%)             | 2 ( 0.1%)              | 3 ( 0.1%)              |
| Neoplasms benign, malignant and unspecified (incl<br>cysts and polyps) | Continuing with change                 | 0                      | 3 ( 0.2%)              | 3 ( 0.1%)              |
|                                                                        | recovered/resolved                     | 24 ( 1.7%)             | 26 ( 1.8%)             | 50 ( 1.7%)             |
|                                                                        | recovering/resolving                   | 0                      | 1 ( <0.1%)             | 1 ( <0.1%)             |
|                                                                        | not recovered/not resolved             | 16 ( 1.1%)             | 9 ( 0.6%)              | 25 ( 0.9%)             |
|                                                                        | recovered/resolved with resid. effects | 3 ( 0.2%)              | 1 ( <0.1%)             | 4 ( 0.1%)              |
| Acoustic neuroma                                                       | not recovered/not resolved             | 0                      | 1 ( <0.1%)             | 1 ( <0.1%)             |
| Acrochordon                                                            | recovered/resolved                     | 1 ( <0.1%)             | 3 ( 0.2%)              | 4 ( 0.1%)              |
| Acute leukaemia                                                        | not recovered/not resolved             | 1 ( <0.1%)             | 0                      | 1 ( <0.1%)             |
| Adenoma benign                                                         | recovered/resolved                     | 0                      | 1 ( <0.1%)             | 1 ( <0.1%)             |
| Astrocytoma, low grade                                                 | recovered/resolved                     | 1 ( <0.1%)             | 0                      | 1 ( <0.1%)             |

**Table 14.3.1 / 14: Number of subjects with adverse events by outcome, primary system organ class and preferred term (FAS)**

| Primary system organ class<br>Preferred term<br>MedDRA version 14.0 | Maximum Derived AE outcome             | LCS12<br>N=1432 (100%) | LCS16<br>N=1452 (100%) | Total<br>N=2884 (100%) |
|---------------------------------------------------------------------|----------------------------------------|------------------------|------------------------|------------------------|
| Benign breast neoplasm                                              | recovered/resolved                     | 2 ( 0.1%)              | 0                      | 2 ( <0.1%)             |
|                                                                     | recovered/resolved with resid. effects | 0                      | 1 ( <0.1%)             | 1 ( <0.1%)             |
| Cervicitis human papilloma virus                                    | recovered/resolved                     | 0                      | 1 ( <0.1%)             | 1 ( <0.1%)             |
|                                                                     | not recovered/not resolved             | 1 ( <0.1%)             | 1 ( <0.1%)             | 2 ( <0.1%)             |
| Cervix carcinoma stage 0                                            | recovering/resolving                   | 0                      | 1 ( <0.1%)             | 1 ( <0.1%)             |
| Cervix neoplasm                                                     | recovered/resolved with resid. effects | 1 ( <0.1%)             | 0                      | 1 ( <0.1%)             |
| Enchondroma                                                         | recovered/resolved                     | 0                      | 1 ( <0.1%)             | 1 ( <0.1%)             |
| Fibroadenoma of breast                                              | recovered/resolved                     | 1 ( <0.1%)             | 2 ( 0.1%)              | 3 ( 0.1%)              |
|                                                                     | not recovered/not resolved             | 5 ( 0.3%)              | 0                      | 5 ( 0.2%)              |
|                                                                     | recovered/resolved with resid. effects | 1 ( <0.1%)             | 0                      | 1 ( <0.1%)             |
| Glomus tumour                                                       | recovered/resolved                     | 1 ( <0.1%)             | 0                      | 1 ( <0.1%)             |
| Haemangioma                                                         | recovered/resolved                     | 1 ( <0.1%)             | 0                      | 1 ( <0.1%)             |
| Haemangioma of liver                                                | not recovered/not resolved             | 0                      | 1 ( <0.1%)             | 1 ( <0.1%)             |
| Lipoma of breast                                                    | recovered/resolved                     | 1 ( <0.1%)             | 0                      | 1 ( <0.1%)             |
|                                                                     | not recovered/not resolved             | 1 ( <0.1%)             | 0                      | 1 ( <0.1%)             |
| Malignant melanoma                                                  | recovered/resolved                     | 0                      | 1 ( <0.1%)             | 1 ( <0.1%)             |
| Melanocytic naevus                                                  | recovered/resolved                     | 6 ( 0.4%)              | 2 ( 0.1%)              | 8 ( 0.3%)              |
|                                                                     | not recovered/not resolved             | 0                      | 2 ( 0.1%)              | 2 ( <0.1%)             |
| Neurilemmoma                                                        | Continuing with change                 | 0                      | 1 ( <0.1%)             | 1 ( <0.1%)             |
| Ovarian germ cell teratoma benign                                   | recovered/resolved                     | 4 ( 0.3%)              | 3 ( 0.2%)              | 7 ( 0.2%)              |
|                                                                     | not recovered/not resolved             | 1 ( <0.1%)             | 0                      | 1 ( <0.1%)             |
| Ovarian neoplasm                                                    | recovered/resolved                     | 0                      | 2 ( 0.1%)              | 2 ( <0.1%)             |



**Table 14.3.1 / 14: Number of subjects with adverse events by outcome, primary system organ class and preferred term (FAS)**

| Primary system organ class                   | Preferred term      | Maximum Derived AE outcome             | LCS12<br>N=1432 (100%) | LCS16<br>N=1452 (100%) | Total<br>N=2884 (100%) |
|----------------------------------------------|---------------------|----------------------------------------|------------------------|------------------------|------------------------|
| Pancreatic carcinoma                         | MedDRA version 14.0 | not recovered/not resolved             | 0                      | 1 ( <0.1%)             | 1 ( <0.1%)             |
|                                              |                     | recovered/resolved                     | 1 ( <0.1%)             | 2 ( 0.1%)              | 3 ( 0.1%)              |
| Teratoma benign                              |                     | recovered/resolved                     | 0                      | 1 ( <0.1%)             | 1 ( <0.1%)             |
| Thyroid cancer                               |                     | recovered/resolved with resid. effects | 1 ( <0.1%)             | 0                      | 1 ( <0.1%)             |
| Thyroid neoplasm                             | MedDRA version 14.0 | recovered/resolved                     | 0                      | 1 ( <0.1%)             | 1 ( <0.1%)             |
|                                              |                     | not recovered/not resolved             | 0                      | 1 ( <0.1%)             | 1 ( <0.1%)             |
| Uterine leiomyoma                            | MedDRA version 14.0 | Continuing with change                 | 0                      | 2 ( 0.1%)              | 2 ( <0.1%)             |
|                                              |                     | recovered/resolved                     | 2 ( 0.1%)              | 2 ( 0.1%)              | 4 ( 0.1%)              |
|                                              |                     | not recovered/not resolved             | 5 ( 0.3%)              | 2 ( 0.1%)              | 7 ( 0.2%)              |
| Vulvovaginal human papilloma virus infection | MedDRA version 14.0 | recovered/resolved                     | 3 ( 0.2%)              | 6 ( 0.4%)              | 9 ( 0.3%)              |
|                                              |                     | not recovered/not resolved             | 2 ( 0.1%)              | 0                      | 2 ( <0.1%)             |
| Nervous system disorders                     | MedDRA version 14.0 | recovered/resolved                     | 134 ( 9.4%)            | 158 ( 10.9%)           | 292 ( 10.1%)           |
|                                              |                     | recovering/resolving                   | 4 ( 0.3%)              | 4 ( 0.3%)              | 8 ( 0.3%)              |
|                                              |                     | not recovered/not resolved             | 57 ( 4.0%)             | 52 ( 3.6%)             | 109 ( 3.8%)            |
|                                              |                     | recovered/resolved with resid. effects | 1 ( <0.1%)             | 0                      | 1 ( <0.1%)             |
| Amnesia                                      | MedDRA version 14.0 | recovering/resolving                   | 1 ( <0.1%)             | 0                      | 1 ( <0.1%)             |
|                                              |                     | not recovered/not resolved             | 0                      | 1 ( <0.1%)             | 1 ( <0.1%)             |
| Aphonia                                      |                     | recovered/resolved                     | 0                      | 1 ( <0.1%)             | 1 ( <0.1%)             |
| Burning sensation                            |                     | recovered/resolved                     | 1 ( <0.1%)             | 0                      | 1 ( <0.1%)             |
| Carpal tunnel syndrome                       | MedDRA version 14.0 | recovered/resolved                     | 0                      | 3 ( 0.2%)              | 3 ( 0.1%)              |
|                                              |                     | not recovered/not resolved             | 1 ( <0.1%)             | 3 ( 0.2%)              | 4 ( 0.1%)              |
| Cervicogenic headache                        |                     | recovered/resolved                     | 1 ( <0.1%)             | 0                      | 1 ( <0.1%)             |
| Cluster headache                             |                     | recovered/resolved                     | 0                      | 1 ( <0.1%)             | 1 ( <0.1%)             |

**Table 14.3.1 / 14: Number of subjects with adverse events by outcome, primary system organ class and preferred term (FAS)**

| Primary system organ class | Preferred term | Maximum Derived AE outcome             | LCS12<br>N=1432 (100%) | LCS16<br>N=1452 (100%) | Total<br>N=2884 (100%) |
|----------------------------|----------------|----------------------------------------|------------------------|------------------------|------------------------|
| Convulsion                 |                | recovered/resolved                     | 1 ( <0.1%)             | 1 ( <0.1%)             | 2 ( <0.1%)             |
|                            |                | not recovered/not resolved             | 0                      | 1 ( <0.1%)             | 1 ( <0.1%)             |
| Disturbance in attention   |                | recovered/resolved                     | 0                      | 1 ( <0.1%)             | 1 ( <0.1%)             |
|                            |                | not recovered/not resolved             | 0                      | 1 ( <0.1%)             | 1 ( <0.1%)             |
| Dizziness                  |                | recovered/resolved                     | 7 ( 0.5%)              | 19 ( 1.3%)             | 26 ( 0.9%)             |
|                            |                | recovering/resolving                   | 0                      | 1 ( <0.1%)             | 1 ( <0.1%)             |
|                            |                | not recovered/not resolved             | 2 ( 0.1%)              | 1 ( <0.1%)             | 3 ( 0.1%)              |
| Dizziness postural         |                | recovered/resolved                     | 1 ( <0.1%)             | 0                      | 1 ( <0.1%)             |
| Facial spasm               |                | recovered/resolved                     | 1 ( <0.1%)             | 0                      | 1 ( <0.1%)             |
| Headache                   |                | Continuing with change                 | 0                      | 1 ( <0.1%)             | 1 ( <0.1%)             |
|                            |                | recovered/resolved                     | 87 ( 6.1%)             | 102 ( 7.0%)            | 189 ( 6.6%)            |
|                            |                | recovering/resolving                   | 2 ( 0.1%)              | 3 ( 0.2%)              | 5 ( 0.2%)              |
|                            |                | not recovered/not resolved             | 39 ( 2.7%)             | 26 ( 1.8%)             | 65 ( 2.3%)             |
|                            |                | recovered/resolved with resid. effects | 1 ( <0.1%)             | 0                      | 1 ( <0.1%)             |
| Hypoaesthesia              |                | recovered/resolved                     | 1 ( <0.1%)             | 3 ( 0.2%)              | 4 ( 0.1%)              |
|                            |                | not recovered/not resolved             | 1 ( <0.1%)             | 1 ( <0.1%)             | 2 ( <0.1%)             |
| Loss of consciousness      |                | recovered/resolved                     | 0                      | 1 ( <0.1%)             | 1 ( <0.1%)             |
| Migraine                   |                | Continuing with change                 | 1 ( <0.1%)             | 0                      | 1 ( <0.1%)             |
|                            |                | recovered/resolved                     | 20 ( 1.4%)             | 23 ( 1.6%)             | 43 ( 1.5%)             |
|                            |                | recovering/resolving                   | 1 ( <0.1%)             | 1 ( <0.1%)             | 2 ( <0.1%)             |
|                            |                | not recovered/not resolved             | 11 ( 0.8%)             | 13 ( 0.9%)             | 24 ( 0.8%)             |
| Migraine with aura         |                | recovered/resolved                     | 3 ( 0.2%)              | 1 ( <0.1%)             | 4 ( 0.1%)              |
|                            |                | not recovered/not resolved             | 1 ( <0.1%)             | 1 ( <0.1%)             | 2 ( <0.1%)             |
| Migraine without aura      |                | recovered/resolved                     | 1 ( <0.1%)             | 0                      | 1 ( <0.1%)             |
| Morton's neuralgia         |                | not recovered/not resolved             | 1 ( <0.1%)             | 0                      | 1 ( <0.1%)             |
| Multiple sclerosis         |                | not recovered/not resolved             | 1 ( <0.1%)             | 0                      | 1 ( <0.1%)             |

**Table 14.3.1 / 14: Number of subjects with adverse events by outcome, primary system organ class and preferred term (FAS)**

| Primary system organ class<br>Preferred term<br>MedDRA version 14.0 | Maximum Derived AE outcome | LCS12<br>N=1432 (100%) | LCS16<br>N=1452 (100%) | Total<br>N=2884 (100%) |
|---------------------------------------------------------------------|----------------------------|------------------------|------------------------|------------------------|
| Muscle contractions involuntary                                     | recovered/resolved         | 0                      | 1 ( <0.1%)             | 1 ( <0.1%)             |
| Nerve compression                                                   | recovered/resolved         | 2 ( 0.1%)              | 0                      | 2 ( <0.1%)             |
| Nervous system disorder                                             | not recovered/not resolved | 0                      | 1 ( <0.1%)             | 1 ( <0.1%)             |
| Paraesthesia                                                        | recovered/resolved         | 0                      | 4 ( 0.3%)              | 4 ( 0.1%)              |
|                                                                     | not recovered/not resolved | 0                      | 1 ( <0.1%)             | 1 ( <0.1%)             |
| Presyncope                                                          | recovered/resolved         | 4 ( 0.3%)              | 9 ( 0.6%)              | 13 ( 0.5%)             |
| Restless legs syndrome                                              | not recovered/not resolved | 1 ( <0.1%)             | 0                      | 1 ( <0.1%)             |
| Sciatica                                                            | recovered/resolved         | 4 ( 0.3%)              | 2 ( 0.1%)              | 6 ( 0.2%)              |
|                                                                     | not recovered/not resolved | 0                      | 1 ( <0.1%)             | 1 ( <0.1%)             |
| Sinus headache                                                      | recovered/resolved         | 1 ( <0.1%)             | 1 ( <0.1%)             | 2 ( <0.1%)             |
|                                                                     | not recovered/not resolved | 0                      | 1 ( <0.1%)             | 1 ( <0.1%)             |
| Somnolence                                                          | recovered/resolved         | 1 ( <0.1%)             | 1 ( <0.1%)             | 2 ( <0.1%)             |
|                                                                     | not recovered/not resolved | 1 ( <0.1%)             | 0                      | 1 ( <0.1%)             |
| Spinal cord herniation                                              | recovered/resolved         | 0                      | 1 ( <0.1%)             | 1 ( <0.1%)             |
| Status migrainosus                                                  | recovered/resolved         | 1 ( <0.1%)             | 0                      | 1 ( <0.1%)             |
| Syncope                                                             | recovered/resolved         | 6 ( 0.4%)              | 5 ( 0.3%)              | 11 ( 0.4%)             |
| Tension headache                                                    | recovered/resolved         | 6 ( 0.4%)              | 7 ( 0.5%)              | 13 ( 0.5%)             |
|                                                                     | not recovered/not resolved | 6 ( 0.4%)              | 2 ( 0.1%)              | 8 ( 0.3%)              |
| Thoracic outlet syndrome                                            | not recovered/not resolved | 1 ( <0.1%)             | 0                      | 1 ( <0.1%)             |
| VIIth nerve paralysis                                               | recovered/resolved         | 2 ( 0.1%)              | 0                      | 2 ( <0.1%)             |
| Pregnancy, puerperium and perinatal conditions                      | recovered/resolved         | 6 ( 0.4%)              | 10 ( 0.7%)             | 16 ( 0.6%)             |

**Table 14.3.1 / 14: Number of subjects with adverse events by outcome, primary system organ class and preferred term (FAS)**

| Primary system organ class | Preferred term                   | Maximum Derived AE outcome | LCS12<br>N=1432 (100%)     | LCS16<br>N=1452 (100%) | Total<br>N=2884 (100%) |             |
|----------------------------|----------------------------------|----------------------------|----------------------------|------------------------|------------------------|-------------|
| MedDRA version 14.0        | Abortion spontaneous             | recovered/resolved         | 3 ( 0.2%)                  | 0                      | 3 ( 0.1%)              |             |
|                            | Abortion spontaneous incomplete  | recovered/resolved         | 0                          | 1 ( <0.1%)             | 1 ( <0.1%)             |             |
|                            | Blighted ovum                    | recovered/resolved         | 0                          | 1 ( <0.1%)             | 1 ( <0.1%)             |             |
|                            | Ectopic pregnancy                | recovered/resolved         | 3 ( 0.2%)                  | 6 ( 0.4%)              | 9 ( 0.3%)              |             |
|                            | Premature separation of placenta | recovered/resolved         | 1 ( <0.1%)                 | 0                      | 1 ( <0.1%)             |             |
|                            | Ruptured ectopic pregnancy       | recovered/resolved         | 0                          | 1 ( <0.1%)             | 1 ( <0.1%)             |             |
|                            | Uterine contractions abnormal    | recovered/resolved         | 0                          | 1 ( <0.1%)             | 1 ( <0.1%)             |             |
|                            | Psychiatric disorders            |                            | recovered/resolved         | 71 ( 5.0%)             | 63 ( 4.3%)             | 134 ( 4.6%) |
|                            |                                  | recovering/resolving       | 10 ( 0.7%)                 | 10 ( 0.7%)             | 20 ( 0.7%)             |             |
|                            |                                  | not recovered/not resolved | 83 ( 5.8%)                 | 90 ( 6.2%)             | 173 ( 6.0%)            |             |
|                            |                                  | fatal                      | 0                          | 1 ( <0.1%)             | 1 ( <0.1%)             |             |
| Acute stress disorder      |                                  | recovered/resolved         | 0                          | 1 ( <0.1%)             | 1 ( <0.1%)             |             |
| Adjustment disorder        |                                  | recovered/resolved         | 1 ( <0.1%)                 | 0                      | 1 ( <0.1%)             |             |
| Affect lability            |                                  | recovered/resolved         | 3 ( 0.2%)                  | 0                      | 3 ( 0.1%)              |             |
|                            |                                  | not recovered/not resolved | 1 ( <0.1%)                 | 1 ( <0.1%)             | 2 ( <0.1%)             |             |
| Affective disorder         |                                  | recovered/resolved         | 0                          | 1 ( <0.1%)             | 1 ( <0.1%)             |             |
| Aggression                 |                                  | recovered/resolved         | 1 ( <0.1%)                 | 0                      | 1 ( <0.1%)             |             |
| Alcohol abuse              |                                  | recovered/resolved         | 0                          | 1 ( <0.1%)             | 1 ( <0.1%)             |             |
| Alcoholism                 |                                  | recovering/resolving       | 0                          | 1 ( <0.1%)             | 1 ( <0.1%)             |             |
| Anxiety                    |                                  |                            | recovered/resolved         | 12 ( 0.8%)             | 14 ( 1.0%)             | 26 ( 0.9%)  |
|                            |                                  |                            | recovering/resolving       | 2 ( 0.1%)              | 5 ( 0.3%)              | 7 ( 0.2%)   |
|                            |                                  |                            | not recovered/not resolved | 21 ( 1.5%)             | 18 ( 1.2%)             | 39 ( 1.4%)  |

**Table 14.3.1 / 14: Number of subjects with adverse events by outcome, primary system organ class and preferred term (FAS)**

| Primary system organ class               | Preferred term      | Maximum Derived AE outcome | LCS12<br>N=1432 (100%) | LCS16<br>N=1452 (100%) | Total<br>N=2884 (100%) |
|------------------------------------------|---------------------|----------------------------|------------------------|------------------------|------------------------|
| Anxiety disorder                         | MedDRA version 14.0 | recovered/resolved         | 0                      | 1 ( <0.1%)             | 1 ( <0.1%)             |
|                                          |                     | not recovered/not resolved | 1 ( <0.1%)             | 3 ( 0.2%)              | 4 ( 0.1%)              |
| Attention deficit/hyperactivity disorder |                     | not recovered/not resolved | 4 ( 0.3%)              | 4 ( 0.3%)              | 8 ( 0.3%)              |
| Bipolar I disorder                       |                     | not recovered/not resolved | 1 ( <0.1%)             | 0                      | 1 ( <0.1%)             |
| Bipolar disorder                         |                     | not recovered/not resolved | 1 ( <0.1%)             | 5 ( 0.3%)              | 6 ( 0.2%)              |
| Bulimia nervosa                          |                     | recovered/resolved         | 0                      | 1 ( <0.1%)             | 1 ( <0.1%)             |
| Burnout syndrome                         |                     | recovered/resolved         | 1 ( <0.1%)             | 2 ( 0.1%)              | 3 ( 0.1%)              |
| Completed suicide                        |                     | fatal                      | 0                      | 1 ( <0.1%)             | 1 ( <0.1%)             |
| Daydreaming                              |                     | recovered/resolved         | 1 ( <0.1%)             | 0                      | 1 ( <0.1%)             |
| Depressed mood                           |                     | recovered/resolved         | 2 ( 0.1%)              | 1 ( <0.1%)             | 3 ( 0.1%)              |
|                                          |                     | not recovered/not resolved | 3 ( 0.2%)              | 1 ( <0.1%)             | 4 ( 0.1%)              |
| Depression                               |                     | recovered/resolved         | 23 ( 1.6%)             | 20 ( 1.4%)             | 43 ( 1.5%)             |
|                                          |                     | recovering/resolving       | 3 ( 0.2%)              | 2 ( 0.1%)              | 5 ( 0.2%)              |
|                                          |                     | not recovered/not resolved | 23 ( 1.6%)             | 25 ( 1.7%)             | 48 ( 1.7%)             |
| Depression suicidal                      |                     | Continuing with change     | 1 ( <0.1%)             | 0                      | 1 ( <0.1%)             |
| Depressive symptom                       |                     | recovered/resolved         | 1 ( <0.1%)             | 0                      | 1 ( <0.1%)             |
| Disorientation                           |                     | recovered/resolved         | 0                      | 1 ( <0.1%)             | 1 ( <0.1%)             |
| Drug dependence                          |                     | recovering/resolving       | 0                      | 1 ( <0.1%)             | 1 ( <0.1%)             |
|                                          |                     | not recovered/not resolved | 1 ( <0.1%)             | 0                      | 1 ( <0.1%)             |
| Fear                                     |                     | recovered/resolved         | 1 ( <0.1%)             | 1 ( <0.1%)             | 2 ( <0.1%)             |
| Generalised anxiety disorder             |                     | recovering/resolving       | 2 ( 0.1%)              | 0                      | 2 ( <0.1%)             |
|                                          |                     | not recovered/not resolved | 1 ( <0.1%)             | 0                      | 1 ( <0.1%)             |

**Table 14.3.1 / 14: Number of subjects with adverse events by outcome, primary system organ class and preferred term (FAS)**

| Primary system organ class<br>Preferred term<br>MedDRA version 14.0 | Maximum Derived AE outcome | LCS12<br>N=1432 (100%) | LCS16<br>N=1452 (100%) | Total<br>N=2884 (100%) |
|---------------------------------------------------------------------|----------------------------|------------------------|------------------------|------------------------|
| Hallucination, auditory                                             | recovered/resolved         | 1 ( <0.1%)             | 0                      | 1 ( <0.1%)             |
| Insomnia                                                            | recovered/resolved         | 13 ( 0.9%)             | 16 ( 1.1%)             | 29 ( 1.0%)             |
|                                                                     | recovering/resolving       | 1 ( <0.1%)             | 0                      | 1 ( <0.1%)             |
|                                                                     | not recovered/not resolved | 7 ( 0.5%)              | 13 ( 0.9%)             | 20 ( 0.7%)             |
| Libido decreased                                                    | recovered/resolved         | 9 ( 0.6%)              | 6 ( 0.4%)              | 15 ( 0.5%)             |
|                                                                     | recovering/resolving       | 0                      | 2 ( 0.1%)              | 2 ( <0.1%)             |
|                                                                     | not recovered/not resolved | 14 ( 1.0%)             | 14 ( 1.0%)             | 28 ( 1.0%)             |
| Libido increased                                                    | recovered/resolved         | 1 ( <0.1%)             | 1 ( <0.1%)             | 2 ( <0.1%)             |
|                                                                     | not recovered/not resolved | 1 ( <0.1%)             | 1 ( <0.1%)             | 2 ( <0.1%)             |
| Loss of libido                                                      | recovered/resolved         | 2 ( 0.1%)              | 1 ( <0.1%)             | 3 ( 0.1%)              |
|                                                                     | not recovered/not resolved | 2 ( 0.1%)              | 1 ( <0.1%)             | 3 ( 0.1%)              |
| Mental status changes                                               | not recovered/not resolved | 0                      | 1 ( <0.1%)             | 1 ( <0.1%)             |
| Mood altered                                                        | recovered/resolved         | 4 ( 0.3%)              | 6 ( 0.4%)              | 10 ( 0.3%)             |
|                                                                     | recovering/resolving       | 1 ( <0.1%)             | 0                      | 1 ( <0.1%)             |
|                                                                     | not recovered/not resolved | 8 ( 0.6%)              | 2 ( 0.1%)              | 10 ( 0.3%)             |
| Mood swings                                                         | recovered/resolved         | 3 ( 0.2%)              | 7 ( 0.5%)              | 10 ( 0.3%)             |
|                                                                     | recovering/resolving       | 2 ( 0.1%)              | 0                      | 2 ( <0.1%)             |
|                                                                     | not recovered/not resolved | 7 ( 0.5%)              | 2 ( 0.1%)              | 9 ( 0.3%)              |
| Nervousness                                                         | recovered/resolved         | 0                      | 1 ( <0.1%)             | 1 ( <0.1%)             |
|                                                                     | not recovered/not resolved | 0                      | 1 ( <0.1%)             | 1 ( <0.1%)             |
| Nicotine dependence                                                 | recovered/resolved         | 1 ( <0.1%)             | 0                      | 1 ( <0.1%)             |
| Obsessive-compulsive personality disorder                           | not recovered/not resolved | 0                      | 1 ( <0.1%)             | 1 ( <0.1%)             |
| Panic attack                                                        | recovered/resolved         | 1 ( <0.1%)             | 0                      | 1 ( <0.1%)             |
|                                                                     | not recovered/not resolved | 0                      | 1 ( <0.1%)             | 1 ( <0.1%)             |
| Panic disorder                                                      | recovered/resolved         | 0                      | 1 ( <0.1%)             | 1 ( <0.1%)             |
|                                                                     | not recovered/not resolved | 1 ( <0.1%)             | 4 ( 0.3%)              | 5 ( 0.2%)              |

**Table 14.3.1 / 14: Number of subjects with adverse events by outcome, primary system organ class and preferred term (FAS)**

| Primary system organ class  | Preferred term                 | Maximum Derived AE outcome | LCS12<br>N=1432 (100%) | LCS16<br>N=1452 (100%) | Total<br>N=2884 (100%) |
|-----------------------------|--------------------------------|----------------------------|------------------------|------------------------|------------------------|
|                             | MedDRA version 14.0            |                            |                        |                        |                        |
|                             | Personality disorder           | recovered/resolved         | 1 ( <0.1%)             | 0                      | 1 ( <0.1%)             |
|                             | Phobia of flying               | not recovered/not resolved | 0                      | 1 ( <0.1%)             | 1 ( <0.1%)             |
|                             | Polysubstance dependence       | recovered/resolved         | 0                      | 1 ( <0.1%)             | 1 ( <0.1%)             |
|                             | Post-traumatic stress disorder | recovering/resolving       | 0                      | 1 ( <0.1%)             | 1 ( <0.1%)             |
|                             |                                | not recovered/not resolved | 1 ( <0.1%)             | 0                      | 1 ( <0.1%)             |
|                             | Psychotic disorder             | not recovered/not resolved | 0                      | 1 ( <0.1%)             | 1 ( <0.1%)             |
|                             | Sleep disorder                 | recovered/resolved         | 4 ( 0.3%)              | 1 ( <0.1%)             | 5 ( 0.2%)              |
|                             |                                | not recovered/not resolved | 1 ( <0.1%)             | 1 ( <0.1%)             | 2 ( <0.1%)             |
|                             | Social phobia                  | recovered/resolved         | 0                      | 1 ( <0.1%)             | 1 ( <0.1%)             |
|                             | Stress                         | recovered/resolved         | 2 ( 0.1%)              | 2 ( 0.1%)              | 4 ( 0.1%)              |
|                             |                                | not recovered/not resolved | 1 ( <0.1%)             | 2 ( 0.1%)              | 3 ( 0.1%)              |
|                             | Suicide attempt                | recovered/resolved         | 1 ( <0.1%)             | 0                      | 1 ( <0.1%)             |
| Renal and urinary disorders |                                | recovered/resolved         | 36 ( 2.5%)             | 24 ( 1.7%)             | 60 ( 2.1%)             |
|                             |                                | recovering/resolving       | 1 ( <0.1%)             | 0                      | 1 ( <0.1%)             |
|                             |                                | not recovered/not resolved | 3 ( 0.2%)              | 5 ( 0.3%)              | 8 ( 0.3%)              |
|                             | Calculus bladder               | recovered/resolved         | 1 ( <0.1%)             | 0                      | 1 ( <0.1%)             |
|                             | Calculus urinary               | recovered/resolved         | 0                      | 1 ( <0.1%)             | 1 ( <0.1%)             |
|                             | Chromaturia                    | recovered/resolved         | 0                      | 1 ( <0.1%)             | 1 ( <0.1%)             |
|                             | Cystitis haemorrhagic          | recovered/resolved         | 1 ( <0.1%)             | 0                      | 1 ( <0.1%)             |
|                             | Dysuria                        | recovered/resolved         | 13 ( 0.9%)             | 7 ( 0.5%)              | 20 ( 0.7%)             |
|                             |                                | recovering/resolving       | 1 ( <0.1%)             | 0                      | 1 ( <0.1%)             |
|                             | Haematuria                     | recovered/resolved         | 2 ( 0.1%)              | 2 ( 0.1%)              | 4 ( 0.1%)              |

**Table 14.3.1 / 14: Number of subjects with adverse events by outcome, primary system organ class and preferred term (FAS)**

| Primary system organ class<br>Preferred term<br>MedDRA version 14.0 | Maximum Derived AE outcome | LCS12<br>N=1432 (100%) | LCS16<br>N=1452 (100%) | Total<br>N=2884 (100%) |
|---------------------------------------------------------------------|----------------------------|------------------------|------------------------|------------------------|
| Hypertonic bladder                                                  | recovered/resolved         | 0                      | 1 ( <0.1%)             | 1 ( <0.1%)             |
|                                                                     | not recovered/not resolved | 0                      | 1 ( <0.1%)             | 1 ( <0.1%)             |
| Micturition urgency                                                 | recovered/resolved         | 2 ( 0.1%)              | 3 ( 0.2%)              | 5 ( 0.2%)              |
| Nephrolithiasis                                                     | recovered/resolved         | 7 ( 0.5%)              | 2 ( 0.1%)              | 9 ( 0.3%)              |
|                                                                     | not recovered/not resolved | 1 ( <0.1%)             | 0                      | 1 ( <0.1%)             |
| Pollakiuria                                                         | recovered/resolved         | 2 ( 0.1%)              | 7 ( 0.5%)              | 9 ( 0.3%)              |
|                                                                     | recovering/resolving       | 1 ( <0.1%)             | 0                      | 1 ( <0.1%)             |
|                                                                     | not recovered/not resolved | 1 ( <0.1%)             | 1 ( <0.1%)             | 2 ( <0.1%)             |
| Polyuria                                                            | recovered/resolved         | 1 ( <0.1%)             | 1 ( <0.1%)             | 2 ( <0.1%)             |
| Renal pain                                                          | recovered/resolved         | 1 ( <0.1%)             | 0                      | 1 ( <0.1%)             |
| Strangury                                                           | recovered/resolved         | 1 ( <0.1%)             | 0                      | 1 ( <0.1%)             |
| Stress urinary incontinence                                         | recovered/resolved         | 1 ( <0.1%)             | 0                      | 1 ( <0.1%)             |
|                                                                     | not recovered/not resolved | 0                      | 2 ( 0.1%)              | 2 ( <0.1%)             |
| Ureteric obstruction                                                | recovered/resolved         | 0                      | 1 ( <0.1%)             | 1 ( <0.1%)             |
| Urethral cyst                                                       | not recovered/not resolved | 0                      | 1 ( <0.1%)             | 1 ( <0.1%)             |
| Urinary incontinence                                                | recovered/resolved         | 2 ( 0.1%)              | 1 ( <0.1%)             | 3 ( 0.1%)              |
|                                                                     | not recovered/not resolved | 1 ( <0.1%)             | 0                      | 1 ( <0.1%)             |
| Urinary retention                                                   | recovered/resolved         | 0                      | 1 ( <0.1%)             | 1 ( <0.1%)             |
| Urinary tract inflammation                                          | recovered/resolved         | 1 ( <0.1%)             | 0                      | 1 ( <0.1%)             |
| Urinary tract pain                                                  | recovered/resolved         | 2 ( 0.1%)              | 1 ( <0.1%)             | 3 ( 0.1%)              |
| Urine odour abnormal                                                | recovered/resolved         | 0                      | 1 ( <0.1%)             | 1 ( <0.1%)             |



**Table 14.3.1 / 14: Number of subjects with adverse events by outcome, primary system organ class and preferred term (FAS)**

| Primary system organ class               | Preferred term | Maximum Derived AE outcome             | LCS12<br>N=1432 (100%) | LCS16<br>N=1452 (100%) | Total<br>N=2884 (100%) |
|------------------------------------------|----------------|----------------------------------------|------------------------|------------------------|------------------------|
| Reproductive system and breast disorders |                | recovered/resolved                     | 425 ( 29.7%)           | 494 ( 34.0%)           | 919 ( 31.9%)           |
|                                          |                | recovering/resolving                   | 26 ( 1.8%)             | 23 ( 1.6%)             | 49 ( 1.7%)             |
|                                          |                | not recovered/not resolved             | 202 ( 14.1%)           | 223 ( 15.4%)           | 425 ( 14.7%)           |
|                                          |                | recovered/resolved with resid. effects | 1 ( <0.1%)             | 2 ( 0.1%)              | 3 ( 0.1%)              |
| Adenomyosis                              |                | not recovered/not resolved             | 1 ( <0.1%)             | 0                      | 1 ( <0.1%)             |
| Adnexa uteri mass                        |                | recovered/resolved                     | 1 ( <0.1%)             | 0                      | 1 ( <0.1%)             |
| Adnexa uteri pain                        |                | recovered/resolved                     | 2 ( 0.1%)              | 5 ( 0.3%)              | 7 ( 0.2%)              |
| Amenorrhoea                              |                | recovered/resolved                     | 0                      | 4 ( 0.3%)              | 4 ( 0.1%)              |
|                                          |                | not recovered/not resolved             | 0                      | 1 ( <0.1%)             | 1 ( <0.1%)             |
| Atrophic vulvovaginitis                  |                | not recovered/not resolved             | 1 ( <0.1%)             | 0                      | 1 ( <0.1%)             |
| Bartholin's cyst                         |                | not recovered/not resolved             | 0                      | 1 ( <0.1%)             | 1 ( <0.1%)             |
| Breast calcifications                    |                | recovered/resolved                     | 1 ( <0.1%)             | 0                      | 1 ( <0.1%)             |
| Breast cyst                              |                | recovered/resolved                     | 1 ( <0.1%)             | 2 ( 0.1%)              | 3 ( 0.1%)              |
|                                          |                | not recovered/not resolved             | 2 ( 0.1%)              | 0                      | 2 ( <0.1%)             |
| Breast discharge                         |                | recovered/resolved                     | 0                      | 9 ( 0.6%)              | 9 ( 0.3%)              |
|                                          |                | not recovered/not resolved             | 0                      | 1 ( <0.1%)             | 1 ( <0.1%)             |
| Breast discomfort                        |                | recovered/resolved                     | 3 ( 0.2%)              | 5 ( 0.3%)              | 8 ( 0.3%)              |
|                                          |                | not recovered/not resolved             | 0                      | 3 ( 0.2%)              | 3 ( 0.1%)              |
| Breast disorder female                   |                | recovered/resolved                     | 0                      | 1 ( <0.1%)             | 1 ( <0.1%)             |
| Breast dysplasia                         |                | recovered/resolved                     | 1 ( <0.1%)             | 0                      | 1 ( <0.1%)             |
| Breast engorgement                       |                | recovered/resolved                     | 1 ( <0.1%)             | 0                      | 1 ( <0.1%)             |
| Breast enlargement                       |                | recovered/resolved                     | 0                      | 1 ( <0.1%)             | 1 ( <0.1%)             |
|                                          |                | not recovered/not resolved             | 0                      | 3 ( 0.2%)              | 3 ( 0.1%)              |

**Table 14.3.1 / 14: Number of subjects with adverse events by outcome, primary system organ class and preferred term (FAS)**

| Primary system organ class<br>Preferred term<br>MedDRA version 14.0 | Maximum Derived AE outcome             | LCS12<br>N=1432 (100%) | LCS16<br>N=1452 (100%) | Total<br>N=2884 (100%) |
|---------------------------------------------------------------------|----------------------------------------|------------------------|------------------------|------------------------|
| Breast mass                                                         | recovered/resolved                     | 4 ( 0.3%)              | 5 ( 0.3%)              | 9 ( 0.3%)              |
|                                                                     | not recovered/not resolved             | 2 ( 0.1%)              | 1 (<0.1%)              | 3 ( 0.1%)              |
| Breast pain                                                         | recovered/resolved                     | 28 ( 2.0%)             | 30 ( 2.1%)             | 58 ( 2.0%)             |
|                                                                     | recovering/resolving                   | 2 ( 0.1%)              | 0                      | 2 (<0.1%)              |
|                                                                     | not recovered/not resolved             | 6 ( 0.4%)              | 12 ( 0.8%)             | 18 ( 0.6%)             |
|                                                                     | recovered/resolved with resid. effects | 0                      | 1 (<0.1%)              | 1 (<0.1%)              |
| Breast swelling                                                     | recovered/resolved                     | 1 (<0.1%)              | 2 ( 0.1%)              | 3 ( 0.1%)              |
| Breast tenderness                                                   | recovered/resolved                     | 23 ( 1.6%)             | 25 ( 1.7%)             | 48 ( 1.7%)             |
|                                                                     | recovering/resolving                   | 1 (<0.1%)              | 1 (<0.1%)              | 2 (<0.1%)              |
|                                                                     | not recovered/not resolved             | 8 ( 0.6%)              | 7 ( 0.5%)              | 15 ( 0.5%)             |
| Cervical cyst                                                       | recovered/resolved                     | 0                      | 1 (<0.1%)              | 1 (<0.1%)              |
| Cervical discharge                                                  | recovering/resolving                   | 1 (<0.1%)              | 0                      | 1 (<0.1%)              |
| Cervical dysplasia                                                  | recovered/resolved                     | 68 ( 4.7%)             | 77 ( 5.3%)             | 145 ( 5.0%)            |
|                                                                     | recovering/resolving                   | 1 (<0.1%)              | 4 ( 0.3%)              | 5 ( 0.2%)              |
|                                                                     | not recovered/not resolved             | 32 ( 2.2%)             | 29 ( 2.0%)             | 61 ( 2.1%)             |
|                                                                     | recovered/resolved with resid. effects | 1 (<0.1%)              | 1 (<0.1%)              | 2 (<0.1%)              |
| Cervical friability                                                 | recovered/resolved                     | 0                      | 1 (<0.1%)              | 1 (<0.1%)              |
| Cervical polyp                                                      | recovered/resolved                     | 1 (<0.1%)              | 2 ( 0.1%)              | 3 ( 0.1%)              |
| Cervix disorder                                                     | recovered/resolved                     | 0                      | 1 (<0.1%)              | 1 (<0.1%)              |
| Cervix erythema                                                     | recovered/resolved                     | 0                      | 1 (<0.1%)              | 1 (<0.1%)              |
|                                                                     | not recovered/not resolved             | 0                      | 1 (<0.1%)              | 1 (<0.1%)              |
| Cervix haemorrhage uterine                                          | recovered/resolved                     | 0                      | 1 (<0.1%)              | 1 (<0.1%)              |
| Cervix inflammation                                                 | recovered/resolved                     | 1 (<0.1%)              | 0                      | 1 (<0.1%)              |
| Cervix oedema                                                       | recovered/resolved                     | 0                      | 1 (<0.1%)              | 1 (<0.1%)              |

**Table 14.3.1 / 14: Number of subjects with adverse events by outcome, primary system organ class and preferred term (FAS)**

| Primary system organ class     |                            | LCS12         | LCS16         | Total         |
|--------------------------------|----------------------------|---------------|---------------|---------------|
| Preferred term                 | Maximum Derived AE outcome | N=1432 (100%) | N=1452 (100%) | N=2884 (100%) |
| MedDRA version 14.0            |                            |               |               |               |
| Coital bleeding                | recovered/resolved         | 7 ( 0.5%)     | 10 ( 0.7%)    | 17 ( 0.6%)    |
|                                | recovering/resolving       | 1 (<0.1%)     | 0             | 1 (<0.1%)     |
|                                | not recovered/not resolved | 6 ( 0.4%)     | 4 ( 0.3%)     | 10 ( 0.3%)    |
| Dysfunctional uterine bleeding | recovered/resolved         | 2 ( 0.1%)     | 2 ( 0.1%)     | 4 ( 0.1%)     |
|                                | not recovered/not resolved | 1 (<0.1%)     | 2 ( 0.1%)     | 3 ( 0.1%)     |
| Dysmenorrhoea                  | recovered/resolved         | 77 ( 5.4%)    | 74 ( 5.1%)    | 151 ( 5.2%)   |
|                                | recovering/resolving       | 4 ( 0.3%)     | 2 ( 0.1%)     | 6 ( 0.2%)     |
|                                | not recovered/not resolved | 45 ( 3.1%)    | 30 ( 2.1%)    | 75 ( 2.6%)    |
| Dyspareunia                    | recovered/resolved         | 19 ( 1.3%)    | 19 ( 1.3%)    | 38 ( 1.3%)    |
|                                | recovering/resolving       | 2 ( 0.1%)     | 2 ( 0.1%)     | 4 ( 0.1%)     |
|                                | not recovered/not resolved | 9 ( 0.6%)     | 6 ( 0.4%)     | 15 ( 0.5%)    |
| Ectropion of cervix            | recovered/resolved         | 1 (<0.1%)     | 1 (<0.1%)     | 2 (<0.1%)     |
|                                | not recovered/not resolved | 1 (<0.1%)     | 0             | 1 (<0.1%)     |
| Endometriosis                  | Continuing with change     | 0             | 1 (<0.1%)     | 1 (<0.1%)     |
|                                | recovered/resolved         | 2 ( 0.1%)     | 0             | 2 (<0.1%)     |
|                                | not recovered/not resolved | 4 ( 0.3%)     | 2 ( 0.1%)     | 6 ( 0.2%)     |
| Fibrocystic breast disease     | recovered/resolved         | 2 ( 0.1%)     | 2 ( 0.1%)     | 4 ( 0.1%)     |
|                                | not recovered/not resolved | 1 (<0.1%)     | 1 (<0.1%)     | 2 (<0.1%)     |
| Galactorrhoea                  | recovered/resolved         | 1 (<0.1%)     | 7 ( 0.5%)     | 8 ( 0.3%)     |
|                                | not recovered/not resolved | 3 ( 0.2%)     | 1 (<0.1%)     | 4 ( 0.1%)     |
| Genital cyst                   | not recovered/not resolved | 0             | 1 (<0.1%)     | 1 (<0.1%)     |
| Genital discharge              | recovered/resolved         | 7 ( 0.5%)     | 7 ( 0.5%)     | 14 ( 0.5%)    |
|                                | not recovered/not resolved | 1 (<0.1%)     | 2 ( 0.1%)     | 3 ( 0.1%)     |
| Genital haemorrhage            | recovered/resolved         | 1 (<0.1%)     | 0             | 1 (<0.1%)     |
| Genital lesion                 | recovered/resolved         | 2 ( 0.1%)     | 0             | 2 (<0.1%)     |
| Genital rash                   | recovered/resolved         | 0             | 1 (<0.1%)     | 1 (<0.1%)     |

**Table 14.3.1 / 14: Number of subjects with adverse events by outcome, primary system organ class and preferred term (FAS)**

| Primary system organ class<br>Preferred term<br>MedDRA version 14.0 | Maximum Derived AE outcome | LCS12<br>N=1432 (100%) | LCS16<br>N=1452 (100%) | Total<br>N=2884 (100%) |
|---------------------------------------------------------------------|----------------------------|------------------------|------------------------|------------------------|
| Haemorrhagic ovarian cyst                                           | recovered/resolved         | 10 ( 0.7%)             | 17 ( 1.2%)             | 27 ( 0.9%)             |
|                                                                     | recovering/resolving       | 2 ( 0.1%)              | 0                      | 2 ( <0.1%)             |
|                                                                     | not recovered/not resolved | 1 ( <0.1%)             | 2 ( 0.1%)              | 3 ( 0.1%)              |
| Hydrometra                                                          | recovered/resolved         | 2 ( 0.1%)              | 0                      | 2 ( <0.1%)             |
| Hypomenorrhoea                                                      | recovered/resolved         | 1 ( <0.1%)             | 0                      | 1 ( <0.1%)             |
|                                                                     | not recovered/not resolved | 1 ( <0.1%)             | 1 ( <0.1%)             | 2 ( <0.1%)             |
| Menometrorrhagia                                                    | not recovered/not resolved | 2 ( 0.1%)              | 0                      | 2 ( <0.1%)             |
| Menorrhagia                                                         | recovered/resolved         | 3 ( 0.2%)              | 3 ( 0.2%)              | 6 ( 0.2%)              |
|                                                                     | recovering/resolving       | 0                      | 1 ( <0.1%)             | 1 ( <0.1%)             |
|                                                                     | not recovered/not resolved | 3 ( 0.2%)              | 4 ( 0.3%)              | 7 ( 0.2%)              |
| Menstrual disorder                                                  | recovered/resolved         | 1 ( <0.1%)             | 1 ( <0.1%)             | 2 ( <0.1%)             |
|                                                                     | not recovered/not resolved | 2 ( 0.1%)              | 0                      | 2 ( <0.1%)             |
| Menstruation irregular                                              | recovered/resolved         | 4 ( 0.3%)              | 0                      | 4 ( 0.1%)              |
|                                                                     | recovering/resolving       | 0                      | 1 ( <0.1%)             | 1 ( <0.1%)             |
|                                                                     | not recovered/not resolved | 0                      | 2 ( 0.1%)              | 2 ( <0.1%)             |
| Metrorrhagia                                                        | recovered/resolved         | 12 ( 0.8%)             | 7 ( 0.5%)              | 19 ( 0.7%)             |
|                                                                     | recovering/resolving       | 1 ( <0.1%)             | 0                      | 1 ( <0.1%)             |
|                                                                     | not recovered/not resolved | 2 ( 0.1%)              | 3 ( 0.2%)              | 5 ( 0.2%)              |
| Nipple exudate bloody                                               | recovered/resolved         | 0                      | 1 ( <0.1%)             | 1 ( <0.1%)             |
| Nipple pain                                                         | recovered/resolved         | 3 ( 0.2%)              | 2 ( 0.1%)              | 5 ( 0.2%)              |
| Oligomenorrhoea                                                     | recovered/resolved         | 0                      | 2 ( 0.1%)              | 2 ( <0.1%)             |
| Ovarian cyst                                                        | recovered/resolved         | 147 ( 10.3%)           | 251 ( 17.3%)           | 398 ( 13.8%)           |
|                                                                     | recovering/resolving       | 3 ( 0.2%)              | 4 ( 0.3%)              | 7 ( 0.2%)              |
|                                                                     | not recovered/not resolved | 26 ( 1.8%)             | 45 ( 3.1%)             | 71 ( 2.5%)             |
| Ovarian cyst ruptured                                               | recovered/resolved         | 2 ( 0.1%)              | 6 ( 0.4%)              | 8 ( 0.3%)              |
|                                                                     | recovering/resolving       | 0                      | 1 ( <0.1%)             | 1 ( <0.1%)             |

**Table 14.3.1 / 14: Number of subjects with adverse events by outcome, primary system organ class and preferred term (FAS)**

| Primary system organ class<br>Preferred term<br>MedDRA version 14.0 | Maximum Derived AE outcome | LCS12<br>N=1432 (100%) | LCS16<br>N=1452 (100%) | Total<br>N=2884 (100%) |
|---------------------------------------------------------------------|----------------------------|------------------------|------------------------|------------------------|
| Ovarian cyst torsion                                                | recovered/resolved         | 0                      | 1 ( <0.1%)             | 1 ( <0.1%)             |
| Ovarian disorder                                                    | not recovered/not resolved | 0                      | 1 ( <0.1%)             | 1 ( <0.1%)             |
| Ovarian enlargement                                                 | recovered/resolved         | 1 ( <0.1%)             | 1 ( <0.1%)             | 2 ( <0.1%)             |
| Ovarian mass                                                        | recovered/resolved         | 1 ( <0.1%)             | 2 ( 0.1%)              | 3 ( 0.1%)              |
| Ovulation pain                                                      | recovered/resolved         | 4 ( 0.3%)              | 1 ( <0.1%)             | 5 ( 0.2%)              |
|                                                                     | recovering/resolving       | 2 ( 0.1%)              | 0                      | 2 ( <0.1%)             |
|                                                                     | not recovered/not resolved | 0                      | 1 ( <0.1%)             | 1 ( <0.1%)             |
| Parovarian cyst                                                     | recovered/resolved         | 2 ( 0.1%)              | 0                      | 2 ( <0.1%)             |
| Pelvic adhesions                                                    | recovered/resolved         | 0                      | 1 ( <0.1%)             | 1 ( <0.1%)             |
| Pelvic congestion                                                   | recovered/resolved         | 1 ( <0.1%)             | 0                      | 1 ( <0.1%)             |
| Pelvic discomfort                                                   | recovered/resolved         | 4 ( 0.3%)              | 1 ( <0.1%)             | 5 ( 0.2%)              |
|                                                                     | not recovered/not resolved | 1 ( <0.1%)             | 1 ( <0.1%)             | 2 ( <0.1%)             |
| Pelvic fluid collection                                             | recovered/resolved         | 1 ( <0.1%)             | 0                      | 1 ( <0.1%)             |
| Pelvic pain                                                         | Continuing with change     | 1 ( <0.1%)             | 1 ( <0.1%)             | 2 ( <0.1%)             |
|                                                                     | recovered/resolved         | 73 ( 5.1%)             | 80 ( 5.5%)             | 153 ( 5.3%)            |
|                                                                     | recovering/resolving       | 2 ( 0.1%)              | 6 ( 0.4%)              | 8 ( 0.3%)              |
|                                                                     | not recovered/not resolved | 14 ( 1.0%)             | 31 ( 2.1%)             | 45 ( 1.6%)             |
| Pelvic prolapse                                                     | recovered/resolved         | 1 ( <0.1%)             | 0                      | 1 ( <0.1%)             |
| Perineal pain                                                       | not recovered/not resolved | 1 ( <0.1%)             | 0                      | 1 ( <0.1%)             |
| Polycystic ovaries                                                  | recovered/resolved         | 2 ( 0.1%)              | 1 ( <0.1%)             | 3 ( 0.1%)              |
|                                                                     | not recovered/not resolved | 2 ( 0.1%)              | 1 ( <0.1%)             | 3 ( 0.1%)              |
| Polymenorrhoea                                                      | recovered/resolved         | 1 ( <0.1%)             | 0                      | 1 ( <0.1%)             |
|                                                                     | not recovered/not resolved | 0                      | 1 ( <0.1%)             | 1 ( <0.1%)             |

**Table 14.3.1 / 14: Number of subjects with adverse events by outcome, primary system organ class and preferred term (FAS)**

| Primary system organ class<br>Preferred term<br>MedDRA version 14.0 | Maximum Derived AE outcome | LCS12<br>N=1432 (100%) | LCS16<br>N=1452 (100%) | Total<br>N=2884 (100%) |
|---------------------------------------------------------------------|----------------------------|------------------------|------------------------|------------------------|
| Premenstrual syndrome                                               | recovered/resolved         | 9 ( 0.6%)              | 3 ( 0.2%)              | 12 ( 0.4%)             |
|                                                                     | not recovered/not resolved | 8 ( 0.6%)              | 9 ( 0.6%)              | 17 ( 0.6%)             |
| Pruritus genital                                                    | recovered/resolved         | 1 ( <0.1%)             | 0                      | 1 ( <0.1%)             |
| Uterine cervical erosion                                            | recovered/resolved         | 1 ( <0.1%)             | 0                      | 1 ( <0.1%)             |
| Uterine cervical pain                                               | recovered/resolved         | 2 ( 0.1%)              | 0                      | 2 ( <0.1%)             |
| Uterine haemorrhage                                                 | recovered/resolved         | 4 ( 0.3%)              | 5 ( 0.3%)              | 9 ( 0.3%)              |
|                                                                     | not recovered/not resolved | 3 ( 0.2%)              | 1 ( <0.1%)             | 4 ( 0.1%)              |
| Uterine inflammation                                                | recovered/resolved         | 0                      | 1 ( <0.1%)             | 1 ( <0.1%)             |
| Uterine pain                                                        | recovered/resolved         | 2 ( 0.1%)              | 0                      | 2 ( <0.1%)             |
|                                                                     | recovering/resolving       | 0                      | 1 ( <0.1%)             | 1 ( <0.1%)             |
|                                                                     | not recovered/not resolved | 0                      | 1 ( <0.1%)             | 1 ( <0.1%)             |
| Uterine polyp                                                       | recovered/resolved         | 2 ( 0.1%)              | 1 ( <0.1%)             | 3 ( 0.1%)              |
| Uterine prolapse                                                    | recovered/resolved         | 1 ( <0.1%)             | 0                      | 1 ( <0.1%)             |
| Uterine spasm                                                       | recovered/resolved         | 23 ( 1.6%)             | 31 ( 2.1%)             | 54 ( 1.9%)             |
|                                                                     | recovering/resolving       | 2 ( 0.1%)              | 2 ( 0.1%)              | 4 ( 0.1%)              |
|                                                                     | not recovered/not resolved | 5 ( 0.3%)              | 5 ( 0.3%)              | 10 ( 0.3%)             |
| Uterine tenderness                                                  | recovered/resolved         | 0                      | 1 ( <0.1%)             | 1 ( <0.1%)             |
|                                                                     | not recovered/not resolved | 0                      | 1 ( <0.1%)             | 1 ( <0.1%)             |
| Vaginal cyst                                                        | not recovered/not resolved | 1 ( <0.1%)             | 0                      | 1 ( <0.1%)             |
| Vaginal discharge                                                   | recovered/resolved         | 40 ( 2.8%)             | 52 ( 3.6%)             | 92 ( 3.2%)             |
|                                                                     | recovering/resolving       | 3 ( 0.2%)              | 2 ( 0.1%)              | 5 ( 0.2%)              |
|                                                                     | not recovered/not resolved | 10 ( 0.7%)             | 4 ( 0.3%)              | 14 ( 0.5%)             |
| Vaginal disorder                                                    | recovered/resolved         | 4 ( 0.3%)              | 4 ( 0.3%)              | 8 ( 0.3%)              |

**Table 14.3.1 / 14: Number of subjects with adverse events by outcome, primary system organ class and preferred term (FAS)**

| Primary system organ class<br>Preferred term<br>MedDRA version 14.0 | Maximum Derived AE outcome | LCS12<br>N=1432 (100%) | LCS16<br>N=1452 (100%) | Total<br>N=2884 (100%) |
|---------------------------------------------------------------------|----------------------------|------------------------|------------------------|------------------------|
| Vaginal haemorrhage                                                 | recovered/resolved         | 30 ( 2.1%)             | 37 ( 2.5%)             | 67 ( 2.3%)             |
|                                                                     | recovering/resolving       | 3 ( 0.2%)              | 4 ( 0.3%)              | 7 ( 0.2%)              |
|                                                                     | not recovered/not resolved | 27 ( 1.9%)             | 28 ( 1.9%)             | 55 ( 1.9%)             |
| Vaginal lesion                                                      | recovered/resolved         | 1 ( <0.1%)             | 0                      | 1 ( <0.1%)             |
| Vaginal odour                                                       | recovered/resolved         | 5 ( 0.3%)              | 7 ( 0.5%)              | 12 ( 0.4%)             |
|                                                                     | not recovered/not resolved | 1 ( <0.1%)             | 0                      | 1 ( <0.1%)             |
| Vaginal perforation                                                 | recovered/resolved         | 0                      | 1 ( <0.1%)             | 1 ( <0.1%)             |
| Vaginal ulceration                                                  | recovered/resolved         | 0                      | 1 ( <0.1%)             | 1 ( <0.1%)             |
| Vaginal wall congestion                                             | recovered/resolved         | 1 ( <0.1%)             | 0                      | 1 ( <0.1%)             |
| Vulval disorder                                                     | recovered/resolved         | 1 ( <0.1%)             | 0                      | 1 ( <0.1%)             |
| Vulvovaginal burning sensation                                      | recovered/resolved         | 1 ( <0.1%)             | 4 ( 0.3%)              | 5 ( 0.2%)              |
| Vulvovaginal discomfort                                             | recovered/resolved         | 5 ( 0.3%)              | 2 ( 0.1%)              | 7 ( 0.2%)              |
| Vulvovaginal dryness                                                | recovered/resolved         | 2 ( 0.1%)              | 2 ( 0.1%)              | 4 ( 0.1%)              |
|                                                                     | not recovered/not resolved | 1 ( <0.1%)             | 3 ( 0.2%)              | 4 ( 0.1%)              |
| Vulvovaginal erythema                                               | recovered/resolved         | 0                      | 2 ( 0.1%)              | 2 ( <0.1%)             |
| Vulvovaginal pain                                                   | recovered/resolved         | 1 ( <0.1%)             | 2 ( 0.1%)              | 3 ( 0.1%)              |
|                                                                     | not recovered/not resolved | 2 ( 0.1%)              | 0                      | 2 ( <0.1%)             |
| Vulvovaginal pruritus                                               | recovered/resolved         | 14 ( 1.0%)             | 16 ( 1.1%)             | 30 ( 1.0%)             |
|                                                                     | recovering/resolving       | 2 ( 0.1%)              | 0                      | 2 ( <0.1%)             |
|                                                                     | not recovered/not resolved | 0                      | 1 ( <0.1%)             | 1 ( <0.1%)             |
| Vulvovaginal swelling                                               | recovered/resolved         | 1 ( <0.1%)             | 1 ( <0.1%)             | 2 ( <0.1%)             |
| Respiratory, thoracic and mediastinal disorders                     | recovered/resolved         | 55 ( 3.8%)             | 50 ( 3.4%)             | 105 ( 3.6%)            |
|                                                                     | recovering/resolving       | 0                      | 1 ( <0.1%)             | 1 ( <0.1%)             |
|                                                                     | not recovered/not resolved | 15 ( 1.0%)             | 18 ( 1.2%)             | 33 ( 1.1%)             |

**Table 14.3.1 / 14: Number of subjects with adverse events by outcome, primary system organ class and preferred term (FAS)**

| Primary system organ class |                            | LCS12         | LCS16         | Total         |
|----------------------------|----------------------------|---------------|---------------|---------------|
| Preferred term             | Maximum Derived AE outcome | N=1432 (100%) | N=1452 (100%) | N=2884 (100%) |
| MedDRA version 14.0        |                            |               |               |               |
| Allergic sinusitis         | recovered/resolved         | 1 ( <0.1%)    | 1 ( <0.1%)    | 2 ( <0.1%)    |
| Asthma                     | recovered/resolved         | 3 ( 0.2%)     | 3 ( 0.2%)     | 6 ( 0.2%)     |
|                            | not recovered/not resolved | 8 ( 0.6%)     | 8 ( 0.6%)     | 16 ( 0.6%)    |
| Atelectasis                | recovered/resolved         | 0             | 1 ( <0.1%)    | 1 ( <0.1%)    |
| Bronchospasm               | recovered/resolved         | 2 ( 0.1%)     | 2 ( 0.1%)     | 4 ( 0.1%)     |
| Cough                      | recovered/resolved         | 11 ( 0.8%)    | 12 ( 0.8%)    | 23 ( 0.8%)    |
|                            | recovering/resolving       | 0             | 1 ( <0.1%)    | 1 ( <0.1%)    |
|                            | not recovered/not resolved | 2 ( 0.1%)     | 0             | 2 ( <0.1%)    |
| Diaphragmatic hernia       | not recovered/not resolved | 0             | 1 ( <0.1%)    | 1 ( <0.1%)    |
| Dyspnoea                   | recovered/resolved         | 1 ( <0.1%)    | 1 ( <0.1%)    | 2 ( <0.1%)    |
|                            | not recovered/not resolved | 0             | 1 ( <0.1%)    | 1 ( <0.1%)    |
| Epiglottic cyst            | recovered/resolved         | 1 ( <0.1%)    | 0             | 1 ( <0.1%)    |
| Epistaxis                  | recovered/resolved         | 3 ( 0.2%)     | 1 ( <0.1%)    | 4 ( 0.1%)     |
| Hyperventilation           | recovered/resolved         | 1 ( <0.1%)    | 1 ( <0.1%)    | 2 ( <0.1%)    |
| Hypoxia                    | recovered/resolved         | 0             | 1 ( <0.1%)    | 1 ( <0.1%)    |
| Nasal congestion           | recovered/resolved         | 1 ( <0.1%)    | 1 ( <0.1%)    | 2 ( <0.1%)    |
|                            | not recovered/not resolved | 1 ( <0.1%)    | 0             | 1 ( <0.1%)    |
| Nasal disorder             | recovered/resolved         | 1 ( <0.1%)    | 0             | 1 ( <0.1%)    |
| Nasal oedema               | recovered/resolved         | 1 ( <0.1%)    | 0             | 1 ( <0.1%)    |
| Nasal polyps               | not recovered/not resolved | 1 ( <0.1%)    | 1 ( <0.1%)    | 2 ( <0.1%)    |
| Oropharyngeal pain         | recovered/resolved         | 16 ( 1.1%)    | 17 ( 1.2%)    | 33 ( 1.1%)    |



**Table 14.3.1 / 14: Number of subjects with adverse events by outcome, primary system organ class and preferred term (FAS)**

| Primary system organ class             | Preferred term                       | Maximum Derived AE outcome                                                                         | LCS12<br>N=1432 (100%)                       | LCS16<br>N=1452 (100%)                                | Total<br>N=2884 (100%)                                 |
|----------------------------------------|--------------------------------------|----------------------------------------------------------------------------------------------------|----------------------------------------------|-------------------------------------------------------|--------------------------------------------------------|
|                                        | MedDRA version 14.0                  |                                                                                                    |                                              |                                                       |                                                        |
|                                        | Pleural effusion                     | recovered/resolved                                                                                 | 0                                            | 1 ( <0.1%)                                            | 1 ( <0.1%)                                             |
|                                        | Pleurisy                             | recovered/resolved                                                                                 | 1 ( <0.1%)                                   | 1 ( <0.1%)                                            | 2 ( <0.1%)                                             |
|                                        | Pneumonitis                          | recovered/resolved                                                                                 | 0                                            | 1 ( <0.1%)                                            | 1 ( <0.1%)                                             |
|                                        | Pneumothorax                         | recovered/resolved                                                                                 | 1 ( <0.1%)                                   | 0                                                     | 1 ( <0.1%)                                             |
|                                        | Pulmonary congestion                 | recovered/resolved                                                                                 | 1 ( <0.1%)                                   | 0                                                     | 1 ( <0.1%)                                             |
|                                        | Respiratory tract congestion         | recovered/resolved                                                                                 | 1 ( <0.1%)                                   | 0                                                     | 1 ( <0.1%)                                             |
|                                        | Respiratory tract inflammation       | recovered/resolved                                                                                 | 1 ( <0.1%)                                   | 0                                                     | 1 ( <0.1%)                                             |
|                                        | Rhinitis allergic                    | recovered/resolved<br>not recovered/not resolved                                                   | 7 ( 0.5%)<br>3 ( 0.2%)                       | 7 ( 0.5%)<br>4 ( 0.3%)                                | 14 ( 0.5%)<br>7 ( 0.2%)                                |
|                                        | Rhinitis seasonal                    | not recovered/not resolved                                                                         | 1 ( <0.1%)                                   | 1 ( <0.1%)                                            | 2 ( <0.1%)                                             |
|                                        | Rhinorrhoea                          | recovered/resolved                                                                                 | 1 ( <0.1%)                                   | 0                                                     | 1 ( <0.1%)                                             |
|                                        | Sinus congestion                     | recovered/resolved                                                                                 | 5 ( 0.3%)                                    | 2 ( 0.1%)                                             | 7 ( 0.2%)                                              |
|                                        | Sinus polyp                          | recovered/resolved                                                                                 | 0                                            | 1 ( <0.1%)                                            | 1 ( <0.1%)                                             |
|                                        | Sleep apnoea syndrome                | not recovered/not resolved                                                                         | 0                                            | 1 ( <0.1%)                                            | 1 ( <0.1%)                                             |
|                                        | Tonsillar disorder                   | not recovered/not resolved                                                                         | 0                                            | 1 ( <0.1%)                                            | 1 ( <0.1%)                                             |
|                                        | Upper respiratory tract inflammation | recovered/resolved                                                                                 | 0                                            | 2 ( 0.1%)                                             | 2 ( <0.1%)                                             |
|                                        | Wheezing                             | recovered/resolved                                                                                 | 1 ( <0.1%)                                   | 0                                                     | 1 ( <0.1%)                                             |
| Skin and subcutaneous tissue disorders |                                      | Continuing with change<br>recovered/resolved<br>recovering/resolving<br>not recovered/not resolved | 0<br>115 ( 8.0%)<br>9 ( 0.6%)<br>113 ( 7.9%) | 1 ( <0.1%)<br>124 ( 8.5%)<br>8 ( 0.6%)<br>114 ( 7.9%) | 1 ( <0.1%)<br>239 ( 8.3%)<br>17 ( 0.6%)<br>227 ( 7.9%) |

**Table 14.3.1 / 14: Number of subjects with adverse events by outcome, primary system organ class and preferred term (FAS)**

| Primary system organ class<br>Preferred term<br>MedDRA version 14.0 | Maximum Derived AE outcome | LCS12<br>N=1432 (100%) | LCS16<br>N=1452 (100%) | Total<br>N=2884 (100%) |
|---------------------------------------------------------------------|----------------------------|------------------------|------------------------|------------------------|
| Acne                                                                | Continuing with change     | 0                      | 1 ( <0.1%)             | 1 ( <0.1%)             |
|                                                                     | recovered/resolved         | 67 ( 4.7%)             | 67 ( 4.6%)             | 134 ( 4.6%)            |
|                                                                     | recovering/resolving       | 7 ( 0.5%)              | 7 ( 0.5%)              | 14 ( 0.5%)             |
|                                                                     | not recovered/not resolved | 85 ( 5.9%)             | 87 ( 6.0%)             | 172 ( 6.0%)            |
| Acne cystic                                                         | not recovered/not resolved | 2 ( 0.1%)              | 0                      | 2 ( <0.1%)             |
| Alopecia                                                            | recovered/resolved         | 5 ( 0.3%)              | 7 ( 0.5%)              | 12 ( 0.4%)             |
|                                                                     | recovering/resolving       | 2 ( 0.1%)              | 0                      | 2 ( <0.1%)             |
|                                                                     | not recovered/not resolved | 8 ( 0.6%)              | 6 ( 0.4%)              | 14 ( 0.5%)             |
| Alopecia areata                                                     | recovered/resolved         | 1 ( <0.1%)             | 0                      | 1 ( <0.1%)             |
|                                                                     | recovering/resolving       | 1 ( <0.1%)             | 0                      | 1 ( <0.1%)             |
| Chloasma                                                            | recovered/resolved         | 2 ( 0.1%)              | 0                      | 2 ( <0.1%)             |
|                                                                     | recovering/resolving       | 1 ( <0.1%)             | 0                      | 1 ( <0.1%)             |
| Cold sweat                                                          | recovered/resolved         | 1 ( <0.1%)             | 0                      | 1 ( <0.1%)             |
| Dandruff                                                            | not recovered/not resolved | 1 ( <0.1%)             | 1 ( <0.1%)             | 2 ( <0.1%)             |
| Dermal cyst                                                         | recovered/resolved         | 2 ( 0.1%)              | 0                      | 2 ( <0.1%)             |
| Dermatitis                                                          | recovered/resolved         | 7 ( 0.5%)              | 7 ( 0.5%)              | 14 ( 0.5%)             |
|                                                                     | not recovered/not resolved | 1 ( <0.1%)             | 0                      | 1 ( <0.1%)             |
| Dermatitis allergic                                                 | recovered/resolved         | 5 ( 0.3%)              | 5 ( 0.3%)              | 10 ( 0.3%)             |
|                                                                     | not recovered/not resolved | 1 ( <0.1%)             | 0                      | 1 ( <0.1%)             |
| Dermatitis atopic                                                   | recovered/resolved         | 1 ( <0.1%)             | 3 ( 0.2%)              | 4 ( 0.1%)              |
|                                                                     | not recovered/not resolved | 1 ( <0.1%)             | 2 ( 0.1%)              | 3 ( 0.1%)              |
| Dermatitis contact                                                  | recovered/resolved         | 2 ( 0.1%)              | 4 ( 0.3%)              | 6 ( 0.2%)              |
|                                                                     | not recovered/not resolved | 0                      | 1 ( <0.1%)             | 1 ( <0.1%)             |
| Drug eruption                                                       | recovered/resolved         | 1 ( <0.1%)             | 0                      | 1 ( <0.1%)             |
| Dry skin                                                            | not recovered/not resolved | 0                      | 1 ( <0.1%)             | 1 ( <0.1%)             |

**Table 14.3.1 / 14: Number of subjects with adverse events by outcome, primary system organ class and preferred term (FAS)**

| Primary system organ class | Preferred term               | Maximum Derived AE outcome | LCS12<br>N=1432 (100%) | LCS16<br>N=1452 (100%) | Total<br>N=2884 (100%) |
|----------------------------|------------------------------|----------------------------|------------------------|------------------------|------------------------|
|                            | MedDRA version 14.0          |                            |                        |                        |                        |
|                            | Dyshidrosis                  | recovered/resolved         | 1 ( <0.1%)             | 0                      | 1 ( <0.1%)             |
|                            | Eczema                       | recovered/resolved         | 3 ( 0.2%)              | 4 ( 0.3%)              | 7 ( 0.2%)              |
|                            |                              | not recovered/not resolved | 3 ( 0.2%)              | 4 ( 0.3%)              | 7 ( 0.2%)              |
|                            | Erythema                     | recovered/resolved         | 2 ( 0.1%)              | 0                      | 2 ( <0.1%)             |
|                            | Erythema multiforme          | recovered/resolved         | 1 ( <0.1%)             | 0                      | 1 ( <0.1%)             |
|                            | Hidradenitis                 | recovered/resolved         | 1 ( <0.1%)             | 0                      | 1 ( <0.1%)             |
|                            | Hirsutism                    | recovered/resolved         | 1 ( <0.1%)             | 2 ( 0.1%)              | 3 ( 0.1%)              |
|                            |                              | recovering/resolving       | 1 ( <0.1%)             | 0                      | 1 ( <0.1%)             |
|                            |                              | not recovered/not resolved | 5 ( 0.3%)              | 8 ( 0.6%)              | 13 ( 0.5%)             |
|                            | Hyperhidrosis                | recovered/resolved         | 2 ( 0.1%)              | 2 ( 0.1%)              | 4 ( 0.1%)              |
|                            |                              | not recovered/not resolved | 1 ( <0.1%)             | 0                      | 1 ( <0.1%)             |
|                            | Hyperkeratosis               | not recovered/not resolved | 1 ( <0.1%)             | 0                      | 1 ( <0.1%)             |
|                            | Hypertrichosis               | not recovered/not resolved | 2 ( 0.1%)              | 1 ( <0.1%)             | 3 ( 0.1%)              |
|                            | Idiopathic urticaria         | recovered/resolved         | 1 ( <0.1%)             | 0                      | 1 ( <0.1%)             |
|                            | Increased tendency to bruise | recovered/resolved         | 1 ( <0.1%)             | 0                      | 1 ( <0.1%)             |
|                            | Ingrown hair                 | recovered/resolved         | 1 ( <0.1%)             | 0                      | 1 ( <0.1%)             |
|                            | Intertrigo                   | recovered/resolved         | 1 ( <0.1%)             | 0                      | 1 ( <0.1%)             |
|                            | Lentigo                      | recovered/resolved         | 1 ( <0.1%)             | 0                      | 1 ( <0.1%)             |
|                            | Lichen sclerosus             | recovered/resolved         | 0                      | 2 ( 0.1%)              | 2 ( <0.1%)             |
|                            |                              | not recovered/not resolved | 1 ( <0.1%)             | 0                      | 1 ( <0.1%)             |
|                            | Neurodermatitis              | recovered/resolved         | 0                      | 1 ( <0.1%)             | 1 ( <0.1%)             |

**Table 14.3.1 / 14: Number of subjects with adverse events by outcome, primary system organ class and preferred term (FAS)**

| Primary system organ class |                            | LCS12         | LCS16         | Total         |
|----------------------------|----------------------------|---------------|---------------|---------------|
| Preferred term             | Maximum Derived AE outcome | N=1432 (100%) | N=1452 (100%) | N=2884 (100%) |
| Night sweats               | not recovered/not resolved | 0             | 1 ( <0.1%)    | 1 ( <0.1%)    |
| Photosensitivity reaction  | recovered/resolved         | 0             | 1 ( <0.1%)    | 1 ( <0.1%)    |
| Pityriasis rosea           | recovered/resolved         | 1 ( <0.1%)    | 2 ( 0.1%)     | 3 ( 0.1%)     |
| Precancerous skin lesion   | recovered/resolved         | 0             | 1 ( <0.1%)    | 1 ( <0.1%)    |
| Pruritus                   | recovered/resolved         | 4 ( 0.3%)     | 3 ( 0.2%)     | 7 ( 0.2%)     |
| Pruritus allergic          | recovered/resolved         | 0             | 2 ( 0.1%)     | 2 ( <0.1%)    |
| Psoriasis                  | not recovered/not resolved | 0             | 2 ( 0.1%)     | 2 ( <0.1%)    |
| Rash                       | Continuing with change     | 1 ( <0.1%)    | 0             | 1 ( <0.1%)    |
|                            | recovered/resolved         | 8 ( 0.6%)     | 6 ( 0.4%)     | 14 ( 0.5%)    |
|                            | not recovered/not resolved | 1 ( <0.1%)    | 2 ( 0.1%)     | 3 ( 0.1%)     |
| Rash macular               | recovered/resolved         | 0             | 1 ( <0.1%)    | 1 ( <0.1%)    |
| Rash papular               | recovered/resolved         | 2 ( 0.1%)     | 1 ( <0.1%)    | 3 ( 0.1%)     |
| Rosacea                    | recovered/resolved         | 1 ( <0.1%)    | 1 ( <0.1%)    | 2 ( <0.1%)    |
|                            | not recovered/not resolved | 0             | 1 ( <0.1%)    | 1 ( <0.1%)    |
| Scar                       | recovered/resolved         | 0             | 1 ( <0.1%)    | 1 ( <0.1%)    |
| Seborrhoea                 | recovered/resolved         | 3 ( 0.2%)     | 5 ( 0.3%)     | 8 ( 0.3%)     |
|                            | not recovered/not resolved | 3 ( 0.2%)     | 5 ( 0.3%)     | 8 ( 0.3%)     |
| Skin dystrophy             | not recovered/not resolved | 1 ( <0.1%)    | 0             | 1 ( <0.1%)    |
| Skin fissures              | recovered/resolved         | 0             | 2 ( 0.1%)     | 2 ( <0.1%)    |
| Skin hypopigmentation      | recovered/resolved         | 0             | 1 ( <0.1%)    | 1 ( <0.1%)    |
| Skin irritation            | recovered/resolved         | 1 ( <0.1%)    | 2 ( 0.1%)     | 3 ( 0.1%)     |

**Table 14.3.1 / 14: Number of subjects with adverse events by outcome, primary system organ class and preferred term (FAS)**

| Primary system organ class       | Preferred term             | Maximum Derived AE outcome | LCS12<br>N=1432 (100%) | LCS16<br>N=1452 (100%) | Total<br>N=2884 (100%) |
|----------------------------------|----------------------------|----------------------------|------------------------|------------------------|------------------------|
| MedDRA version 14.0              | Skin lesion                | recovered/resolved         | 0                      | 1 ( <0.1%)             | 1 ( <0.1%)             |
|                                  | Skin odour abnormal        | not recovered/not resolved | 0                      | 1 ( <0.1%)             | 1 ( <0.1%)             |
|                                  | Skin reaction              | recovered/resolved         | 2 ( 0.1%)              | 0                      | 2 ( <0.1%)             |
|                                  | Urticaria                  | recovered/resolved         | 9 ( 0.6%)              | 8 ( 0.6%)              | 17 ( 0.6%)             |
|                                  |                            | recovering/resolving       | 0                      | 2 ( 0.1%)              | 2 ( <0.1%)             |
| not recovered/not resolved       |                            | 2 ( 0.1%)                  | 0                      | 2 ( <0.1%)             |                        |
| Vitiligo                         | recovered/resolved         | 0                          | 1 ( <0.1%)             | 1 ( <0.1%)             |                        |
| Social circumstances             | recovered/resolved         | 1 ( <0.1%)                 | 0                      | 1 ( <0.1%)             |                        |
|                                  | not recovered/not resolved | 0                          | 1 ( <0.1%)             | 1 ( <0.1%)             |                        |
| Exposure to communicable disease | recovered/resolved         | 1 ( <0.1%)                 | 0                      | 1 ( <0.1%)             |                        |
| Hearing disability               | not recovered/not resolved | 0                          | 1 ( <0.1%)             | 1 ( <0.1%)             |                        |
| Surgical and medical procedures  | recovered/resolved         | 39 ( 2.7%)                 | 43 ( 3.0%)             | 82 ( 2.8%)             |                        |
|                                  | recovering/resolving       | 0                          | 2 ( 0.1%)              | 2 ( <0.1%)             |                        |
|                                  | not recovered/not resolved | 1 ( <0.1%)                 | 0                      | 1 ( <0.1%)             |                        |
| Abdominoplasty                   | recovered/resolved         | 4 ( 0.3%)                  | 1 ( <0.1%)             | 5 ( 0.2%)              |                        |
| Anal fissure excision            | recovered/resolved         | 1 ( <0.1%)                 | 0                      | 1 ( <0.1%)             |                        |
| Anal sphincterotomy              | recovered/resolved         | 0                          | 1 ( <0.1%)             | 1 ( <0.1%)             |                        |
| Apicectomy                       | recovered/resolved         | 0                          | 1 ( <0.1%)             | 1 ( <0.1%)             |                        |
| Breast prosthesis implantation   | recovered/resolved         | 3 ( 0.2%)                  | 0                      | 3 ( 0.1%)              |                        |
|                                  | recovering/resolving       | 0                          | 1 ( <0.1%)             | 1 ( <0.1%)             |                        |
| Bunion operation                 | recovered/resolved         | 2 ( 0.1%)                  | 1 ( <0.1%)             | 3 ( 0.1%)              |                        |
| Cervix cautery                   | recovered/resolved         | 0                          | 1 ( <0.1%)             | 1 ( <0.1%)             |                        |

**Table 14.3.1 / 14: Number of subjects with adverse events by outcome, primary system organ class and preferred term (FAS)**

| Primary system organ class<br>Preferred term<br>MedDRA version 14.0 | Maximum Derived AE outcome                       | LCS12<br>N=1432 (100%) | LCS16<br>N=1452 (100%) | Total<br>N=2884 (100%)   |
|---------------------------------------------------------------------|--------------------------------------------------|------------------------|------------------------|--------------------------|
| Cholecystectomy                                                     | recovered/resolved                               | 1 ( <0.1%)             | 0                      | 1 ( <0.1%)               |
| Dental cosmetic procedure                                           | recovered/resolved                               | 1 ( <0.1%)             | 0                      | 1 ( <0.1%)               |
| Dental operation                                                    | recovered/resolved                               | 1 ( <0.1%)             | 3 ( 0.2%)              | 4 ( 0.1%)                |
| Detoxification                                                      | recovered/resolved<br>not recovered/not resolved | 0<br>1 ( <0.1%)        | 1 ( <0.1%)<br>0        | 1 ( <0.1%)<br>1 ( <0.1%) |
| Endodontic procedure                                                | recovered/resolved                               | 0                      | 2 ( 0.1%)              | 2 ( <0.1%)               |
| Eye laser surgery                                                   | recovered/resolved                               | 0                      | 1 ( <0.1%)             | 1 ( <0.1%)               |
| Gallbladder operation                                               | recovered/resolved                               | 0                      | 1 ( <0.1%)             | 1 ( <0.1%)               |
| Gastric banding                                                     | recovered/resolved                               | 1 ( <0.1%)             | 0                      | 1 ( <0.1%)               |
| Gastric bypass                                                      | recovered/resolved                               | 0                      | 1 ( <0.1%)             | 1 ( <0.1%)               |
| Haemorrhoid operation                                               | recovered/resolved                               | 0                      | 1 ( <0.1%)             | 1 ( <0.1%)               |
| Keratomileusis                                                      | recovered/resolved                               | 0                      | 1 ( <0.1%)             | 1 ( <0.1%)               |
| Ligament operation                                                  | recovered/resolved                               | 1 ( <0.1%)             | 0                      | 1 ( <0.1%)               |
| Lipoma excision                                                     | recovered/resolved                               | 1 ( <0.1%)             | 0                      | 1 ( <0.1%)               |
| Mammoplasty                                                         | recovered/resolved                               | 6 ( 0.4%)              | 3 ( 0.2%)              | 9 ( 0.3%)                |
| Maxillary antrum operation                                          | recovered/resolved                               | 1 ( <0.1%)             | 0                      | 1 ( <0.1%)               |
| Meniscus operation                                                  | recovered/resolved                               | 0                      | 1 ( <0.1%)             | 1 ( <0.1%)               |
| Mole excision                                                       | recovered/resolved                               | 2 ( 0.1%)              | 2 ( 0.1%)              | 4 ( 0.1%)                |
| Nasal polypectomy                                                   | recovered/resolved                               | 0                      | 1 ( <0.1%)             | 1 ( <0.1%)               |

**Table 14.3.1 / 14: Number of subjects with adverse events by outcome, primary system organ class and preferred term (FAS)**

| Primary system organ class | Preferred term                  | Maximum Derived AE outcome             | LCS12<br>N=1432 (100%) | LCS16<br>N=1452 (100%) | Total<br>N=2884 (100%) |
|----------------------------|---------------------------------|----------------------------------------|------------------------|------------------------|------------------------|
|                            | MedDRA version 14.0             |                                        |                        |                        |                        |
|                            | Parasitic infection prophylaxis | recovered/resolved                     | 0                      | 1 ( <0.1%)             | 1 ( <0.1%)             |
|                            | Plastic surgery                 | recovered/resolved                     | 0                      | 1 ( <0.1%)             | 1 ( <0.1%)             |
|                            | Postoperative analgesia         | recovered/resolved                     | 1 ( <0.1%)             | 0                      | 1 ( <0.1%)             |
|                            | Rotator cuff repair             | recovered/resolved                     | 0                      | 1 ( <0.1%)             | 1 ( <0.1%)             |
|                            |                                 | recovering/resolving                   | 0                      | 1 ( <0.1%)             | 1 ( <0.1%)             |
|                            | Scar excision                   | recovered/resolved                     | 0                      | 1 ( <0.1%)             | 1 ( <0.1%)             |
|                            | Skin neoplasm excision          | recovered/resolved                     | 0                      | 1 ( <0.1%)             | 1 ( <0.1%)             |
|                            | Tenolysis                       | recovered/resolved                     | 0                      | 1 ( <0.1%)             | 1 ( <0.1%)             |
|                            | Tonsillectomy                   | recovered/resolved                     | 1 ( <0.1%)             | 2 ( 0.1%)              | 3 ( 0.1%)              |
|                            | Tooth extraction                | recovered/resolved                     | 6 ( 0.4%)              | 9 ( 0.6%)              | 15 ( 0.5%)             |
|                            | Umbilical hernia repair         | recovered/resolved                     | 0                      | 1 ( <0.1%)             | 1 ( <0.1%)             |
|                            | Varicose vein operation         | recovered/resolved                     | 1 ( <0.1%)             | 0                      | 1 ( <0.1%)             |
|                            | Wisdom teeth removal            | recovered/resolved                     | 7 ( 0.5%)              | 5 ( 0.3%)              | 12 ( 0.4%)             |
|                            | Wrist surgery                   | recovered/resolved                     | 0                      | 1 ( <0.1%)             | 1 ( <0.1%)             |
| Vascular disorders         |                                 | recovered/resolved                     | 10 ( 0.7%)             | 13 ( 0.9%)             | 23 ( 0.8%)             |
|                            |                                 | recovering/resolving                   | 2 ( 0.1%)              | 2 ( 0.1%)              | 4 ( 0.1%)              |
|                            |                                 | not recovered/not resolved             | 7 ( 0.5%)              | 9 ( 0.6%)              | 16 ( 0.6%)             |
|                            |                                 | recovered/resolved with resid. effects | 1 ( <0.1%)             | 1 ( <0.1%)             | 2 ( <0.1%)             |
|                            | Deep vein thrombosis            | recovered/resolved                     | 1 ( <0.1%)             | 0                      | 1 ( <0.1%)             |
|                            | Hot flush                       | recovered/resolved                     | 2 ( 0.1%)              | 1 ( <0.1%)             | 3 ( 0.1%)              |
|                            |                                 | not recovered/not resolved             | 2 ( 0.1%)              | 2 ( 0.1%)              | 4 ( 0.1%)              |

**Table 14.3.1 / 14: Number of subjects with adverse events by outcome, primary system organ class and preferred term (FAS)**

| Primary system organ class   |                                        | LCS12         | LCS16         | Total         |
|------------------------------|----------------------------------------|---------------|---------------|---------------|
| Preferred term               | Maximum Derived AE outcome             | N=1432 (100%) | N=1452 (100%) | N=2884 (100%) |
| MedDRA version 14.0          |                                        |               |               |               |
| Hypertension                 | recovered/resolved                     | 3 ( 0.2%)     | 6 ( 0.4%)     | 9 ( 0.3%)     |
|                              | recovering/resolving                   | 2 ( 0.1%)     | 2 ( 0.1%)     | 4 ( 0.1%)     |
|                              | not recovered/not resolved             | 5 ( 0.3%)     | 6 ( 0.4%)     | 11 ( 0.4%)    |
|                              | recovered/resolved with resid. effects | 1 ( <0.1%)    | 1 ( <0.1%)    | 2 ( <0.1%)    |
| Hypotension                  | recovered/resolved                     | 1 ( <0.1%)    | 2 ( 0.1%)     | 3 ( 0.1%)     |
| Neurogenic shock             | recovered/resolved                     | 2 ( 0.1%)     | 0             | 2 ( <0.1%)    |
| Phlebitis                    | recovered/resolved                     | 0             | 1 ( <0.1%)    | 1 ( <0.1%)    |
| Thrombophlebitis superficial | recovered/resolved                     | 1 ( <0.1%)    | 0             | 1 ( <0.1%)    |
| Varicose vein                | recovered/resolved                     | 1 ( <0.1%)    | 3 ( 0.2%)     | 4 ( 0.1%)     |
|                              | not recovered/not resolved             | 0             | 2 ( 0.1%)     | 2 ( <0.1%)    |
| Vein pain                    | not recovered/not resolved             | 0             | 1 ( <0.1%)    | 1 ( <0.1%)    |

Note: A subject is counted only once within each preferred term of any primary SOC.

Note: Adverse events are sorted in alphabetical order by primary SOC and preferred term.

Note: Only the most severe outcome is counted for multiple occurrences of the same AE in one individual.

Code for outcome=continuing with change is recoded to 0.5 with the possible smallest code for outcome

Global Biostatistics: /by-sasp/patdb/projects/de04209/310442/stat/prod\_interim03/pgms/t-ae.sas epkl 12OCT2011 11:24

End of table



**Table 14.3.1 / 15: Number of subjects with common (=> 1%) adverse events by preferred term (FAS)**

| Preferred term<br>MedDRA version 14.0 | LCS12<br>N=1432 (100%) | LCS16<br>N=1452 (100%) | Total<br>N=2884 (100%) |
|---------------------------------------|------------------------|------------------------|------------------------|
| Ovarian cyst                          | 186 ( 13.0%)           | 304 ( 20.9%)           | 490 ( 17.0%)           |
| Acne                                  | 163 ( 11.4%)           | 169 ( 11.6%)           | 332 ( 11.5%)           |
| Urinary tract infection               | 158 ( 11.0%)           | 145 ( 10.0%)           | 303 ( 10.5%)           |
| Headache                              | 133 ( 9.3%)            | 137 ( 9.4%)            | 270 ( 9.4%)            |
| Dysmenorrhoea                         | 130 ( 9.1%)            | 108 ( 7.4%)            | 238 ( 8.3%)            |
| Cervical dysplasia                    | 107 ( 7.5%)            | 115 ( 7.9%)            | 222 ( 7.7%)            |
| Vaginitis bacterial                   | 105 ( 7.3%)            | 127 ( 8.7%)            | 232 ( 8.0%)            |
| Nasopharyngitis                       | 103 ( 7.2%)            | 109 ( 7.5%)            | 212 ( 7.4%)            |
| Abdominal pain                        | 100 ( 7.0%)            | 101 ( 7.0%)            | 201 ( 7.0%)            |
| Vulvovaginal mycotic infection        | 99 ( 6.9%)             | 110 ( 7.6%)            | 209 ( 7.2%)            |
| Pelvic pain                           | 96 ( 6.7%)             | 123 ( 8.5%)            | 219 ( 7.6%)            |
| Sinusitis                             | 90 ( 6.3%)             | 96 ( 6.6%)             | 186 ( 6.4%)            |
| Nausea                                | 74 ( 5.2%)             | 58 ( 4.0%)             | 132 ( 4.6%)            |
| Influenza                             | 72 ( 5.0%)             | 94 ( 6.5%)             | 166 ( 5.8%)            |
| Vulvovaginal candidiasis              | 72 ( 5.0%)             | 72 ( 5.0%)             | 144 ( 5.0%)            |
| Abdominal pain lower                  | 67 ( 4.7%)             | 61 ( 4.2%)             | 128 ( 4.4%)            |
| Vaginal haemorrhage                   | 66 ( 4.6%)             | 73 ( 5.0%)             | 139 ( 4.8%)            |
| Back pain                             | 59 ( 4.1%)             | 65 ( 4.5%)             | 124 ( 4.3%)            |
| Bronchitis                            | 58 ( 4.1%)             | 38 ( 2.6%)             | 96 ( 3.3%)             |
| Procedural pain                       | 58 ( 4.1%)             | 54 ( 3.7%)             | 112 ( 3.9%)            |
| Weight increased                      | 56 ( 3.9%)             | 68 ( 4.7%)             | 124 ( 4.3%)            |
| Vaginal discharge                     | 55 ( 3.8%)             | 58 ( 4.0%)             | 113 ( 3.9%)            |
| Depression                            | 51 ( 3.6%)             | 49 ( 3.4%)             | 100 ( 3.5%)            |
| Upper respiratory tract infection     | 51 ( 3.6%)             | 57 ( 3.9%)             | 108 ( 3.7%)            |
| Vaginal infection                     | 48 ( 3.4%)             | 60 ( 4.1%)             | 108 ( 3.7%)            |
| Device expulsion                      | 46 ( 3.2%)             | 37 ( 2.5%)             | 83 ( 2.9%)             |
| Seasonal allergy                      | 39 ( 2.7%)             | 44 ( 3.0%)             | 83 ( 2.9%)             |
| Anxiety                               | 37 ( 2.6%)             | 37 ( 2.5%)             | 74 ( 2.6%)             |
| Breast pain                           | 36 ( 2.5%)             | 43 ( 3.0%)             | 79 ( 2.7%)             |
| Migraine                              | 34 ( 2.4%)             | 38 ( 2.6%)             | 72 ( 2.5%)             |
| Dyspareunia                           | 33 ( 2.3%)             | 28 ( 1.9%)             | 61 ( 2.1%)             |
| Breast tenderness                     | 32 ( 2.2%)             | 35 ( 2.4%)             | 67 ( 2.3%)             |
| Gastroenteritis                       | 31 ( 2.2%)             | 29 ( 2.0%)             | 60 ( 2.1%)             |
| Cystitis                              | 30 ( 2.1%)             | 26 ( 1.8%)             | 56 ( 1.9%)             |
| Uterine spasm                         | 30 ( 2.1%)             | 39 ( 2.7%)             | 69 ( 2.4%)             |
| Ear infection                         | 27 ( 1.9%)             | 13 ( 0.9%)             | 40 ( 1.4%)             |
| Libido decreased                      | 27 ( 1.9%)             | 25 ( 1.7%)             | 52 ( 1.8%)             |
| Tonsillitis                           | 25 ( 1.7%)             | 24 ( 1.7%)             | 49 ( 1.7%)             |
| Tooth infection                       | 25 ( 1.7%)             | 15 ( 1.0%)             | 40 ( 1.4%)             |
| Fatigue                               | 24 ( 1.7%)             | 27 ( 1.9%)             | 51 ( 1.8%)             |
| Pharyngitis streptococcal             | 23 ( 1.6%)             | 21 ( 1.4%)             | 44 ( 1.5%)             |
| Insomnia                              | 22 ( 1.5%)             | 29 ( 2.0%)             | 51 ( 1.8%)             |
| Abdominal distension                  | 21 ( 1.5%)             | 11 ( 0.8%)             | 32 ( 1.1%)             |
| Arthralgia                            | 21 ( 1.5%)             | 31 ( 2.1%)             | 52 ( 1.8%)             |
| Diarrhoea                             | 19 ( 1.3%)             | 27 ( 1.9%)             | 46 ( 1.6%)             |

**Table 14.3.1 / 15: Number of subjects with common (=> 1%) adverse events by preferred term (FAS)**

| Preferred term<br>MedDRA version 14.0   | LCS12<br>N=1432 (100%) | LCS16<br>N=1452 (100%) | Total<br>N=2884 (100%) |
|-----------------------------------------|------------------------|------------------------|------------------------|
| Pyrexia                                 | 18 ( 1.3%)             | 16 ( 1.1%)             | 34 ( 1.2%)             |
| Smear cervix abnormal                   | 18 ( 1.3%)             | 28 ( 1.9%)             | 46 ( 1.6%)             |
| Oropharyngeal pain                      | 17 ( 1.2%)             | 17 ( 1.2%)             | 34 ( 1.2%)             |
| Premenstrual syndrome                   | 17 ( 1.2%)             | 12 ( 0.8%)             | 29 ( 1.0%)             |
| Toothache                               | 17 ( 1.2%)             | 26 ( 1.8%)             | 43 ( 1.5%)             |
| Vomiting                                | 17 ( 1.2%)             | 24 ( 1.7%)             | 41 ( 1.4%)             |
| Constipation                            | 16 ( 1.1%)             | 18 ( 1.2%)             | 34 ( 1.2%)             |
| Metrorrhagia                            | 16 ( 1.1%)             | 12 ( 0.8%)             | 28 ( 1.0%)             |
| Vulvovaginal pruritus                   | 16 ( 1.1%)             | 17 ( 1.2%)             | 33 ( 1.1%)             |
| Alopecia                                | 15 ( 1.0%)             | 13 ( 0.9%)             | 28 ( 1.0%)             |
| Conjunctivitis                          | 15 ( 1.0%)             | 15 ( 1.0%)             | 30 ( 1.0%)             |
| Mood altered                            | 15 ( 1.0%)             | 10 ( 0.7%)             | 25 ( 0.9%)             |
| Viral upper respiratory tract infection | 15 ( 1.0%)             | 14 ( 1.0%)             | 29 ( 1.0%)             |
| Pneumonia                               | 14 ( 1.0%)             | 15 ( 1.0%)             | 29 ( 1.0%)             |
| Gastritis                               | 13 ( 0.9%)             | 16 ( 1.1%)             | 29 ( 1.0%)             |
| Haemorrhagic ovarian cyst               | 13 ( 0.9%)             | 19 ( 1.3%)             | 32 ( 1.1%)             |
| Pharyngitis                             | 13 ( 0.9%)             | 21 ( 1.4%)             | 34 ( 1.2%)             |
| Hypertension                            | 11 ( 0.8%)             | 16 ( 1.1%)             | 27 ( 0.9%)             |
| Respiratory tract infection             | 10 ( 0.7%)             | 16 ( 1.1%)             | 26 ( 0.9%)             |
| Dizziness                               | 9 ( 0.6%)              | 22 ( 1.5%)             | 31 ( 1.1%)             |
| Pain in extremity                       | 6 ( 0.4%)              | 15 ( 1.0%)             | 21 ( 0.7%)             |
| Cervicitis                              | 5 ( 0.3%)              | 15 ( 1.0%)             | 20 ( 0.7%)             |

Note: A subject is counted only once within each preferred term.

Note: Adverse events are sorted by decreasing frequency of the LCS12 treatment arm.

Global Biostatistics: /by-sasp/patdb/projects/de04209/310442/stat/prod\_interim03/pgms/t-ae.sas epkl 12OCT2011 11:24

End of table

**Table 14.3.1 / 16: Number of subjects with adverse events by maximum intensity, primary system organ class and preferred term (FAS)**

| Primary system organ class<br>Preferred term<br>MedDRA version 14.0 | Maximum AE<br>maximum<br>intensity | LCS12<br>N=1432 (100%) | LCS16<br>N=1452 (100%) | Total<br>N=2884 (100%) |
|---------------------------------------------------------------------|------------------------------------|------------------------|------------------------|------------------------|
| <b>Number of subjects (%) with at least one AE</b>                  |                                    |                        |                        |                        |
|                                                                     | mild                               | 313 ( 21.9%)           | 353 ( 24.3%)           | 666 ( 23.1%)           |
|                                                                     | moderate                           | 616 ( 43.0%)           | 633 ( 43.6%)           | 1249 ( 43.3%)          |
|                                                                     | severe                             | 261 ( 18.2%)           | 250 ( 17.2%)           | 511 ( 17.7%)           |
| <b>Blood and lymphatic system disorders</b>                         |                                    |                        |                        |                        |
|                                                                     | mild                               | 12 ( 0.8%)             | 6 ( 0.4%)              | 18 ( 0.6%)             |
|                                                                     | moderate                           | 2 ( 0.1%)              | 2 ( 0.1%)              | 4 ( 0.1%)              |
|                                                                     | severe                             | 1 (<0.1%)              | 0                      | 1 (<0.1%)              |
| Anaemia                                                             | mild                               | 5 ( 0.3%)              | 3 ( 0.2%)              | 8 ( 0.3%)              |
|                                                                     | moderate                           | 1 (<0.1%)              | 0                      | 1 (<0.1%)              |
| Iron deficiency anaemia                                             | mild                               | 1 (<0.1%)              | 1 (<0.1%)              | 2 (<0.1%)              |
| Leukocytosis                                                        | moderate                           | 1 (<0.1%)              | 0                      | 1 (<0.1%)              |
| Lymphadenitis                                                       | mild                               | 2 ( 0.1%)              | 0                      | 2 (<0.1%)              |
|                                                                     | moderate                           | 1 (<0.1%)              | 0                      | 1 (<0.1%)              |
| Lymphadenopathy                                                     | mild                               | 3 ( 0.2%)              | 1 (<0.1%)              | 4 ( 0.1%)              |
|                                                                     | moderate                           | 0                      | 2 ( 0.1%)              | 2 (<0.1%)              |
| Pancytopenia                                                        | mild                               | 0                      | 1 (<0.1%)              | 1 (<0.1%)              |
| Spherocytic anaemia                                                 | severe                             | 1 (<0.1%)              | 0                      | 1 (<0.1%)              |
| Splenic cyst                                                        | mild                               | 1 (<0.1%)              | 0                      | 1 (<0.1%)              |
| Splenomegaly                                                        | moderate                           | 1 (<0.1%)              | 0                      | 1 (<0.1%)              |
| <b>Cardiac disorders</b>                                            |                                    |                        |                        |                        |
|                                                                     | mild                               | 6 ( 0.4%)              | 10 ( 0.7%)             | 16 ( 0.6%)             |
|                                                                     | moderate                           | 3 ( 0.2%)              | 3 ( 0.2%)              | 6 ( 0.2%)              |
|                                                                     | severe                             | 0                      | 1 (<0.1%)              | 1 (<0.1%)              |
| Arrhythmia                                                          | mild                               | 0                      | 2 ( 0.1%)              | 2 (<0.1%)              |
|                                                                     | moderate                           | 1 (<0.1%)              | 0                      | 1 (<0.1%)              |
| Extrasystoles                                                       | mild                               | 0                      | 2 ( 0.1%)              | 2 (<0.1%)              |

**Table 14.3.1 / 16: Number of subjects with adverse events by maximum intensity, primary system organ class and preferred term (FAS)**

| Primary system organ class<br>Preferred term<br>MedDRA version 14.0 | Maximum AE<br>maximum<br>intensity | LCS12<br>N=1432 (100%) | LCS16<br>N=1452 (100%) | Total<br>N=2884 (100%) |
|---------------------------------------------------------------------|------------------------------------|------------------------|------------------------|------------------------|
| Mitral valve prolapse                                               | mild                               | 0                      | 2 ( 0.1%)              | 2 ( <0.1%)             |
| Palpitations                                                        | mild                               | 2 ( 0.1%)              | 4 ( 0.3%)              | 6 ( 0.2%)              |
|                                                                     | moderate                           | 2 ( 0.1%)              | 1 ( <0.1%)             | 3 ( 0.1%)              |
|                                                                     | severe                             | 0                      | 1 ( <0.1%)             | 1 ( <0.1%)             |
| Sinus tachycardia                                                   | moderate                           | 0                      | 1 ( <0.1%)             | 1 ( <0.1%)             |
| Tachycardia                                                         | mild                               | 4 ( 0.3%)              | 1 ( <0.1%)             | 5 ( 0.2%)              |
|                                                                     | moderate                           | 0                      | 1 ( <0.1%)             | 1 ( <0.1%)             |
| Ventricular extrasystoles                                           | mild                               | 0                      | 1 ( <0.1%)             | 1 ( <0.1%)             |
| Congenital, familial and genetic disorders                          | mild                               | 3 ( 0.2%)              | 1 ( <0.1%)             | 4 ( 0.1%)              |
| Congenital hydronephrosis                                           | mild                               | 1 ( <0.1%)             | 0                      | 1 ( <0.1%)             |
| Dermoid cyst                                                        | mild                               | 1 ( <0.1%)             | 0                      | 1 ( <0.1%)             |
| Myotonia congenita                                                  | mild                               | 0                      | 1 ( <0.1%)             | 1 ( <0.1%)             |
| Urethral intrinsic sphincter deficiency                             | mild                               | 1 ( <0.1%)             | 0                      | 1 ( <0.1%)             |
| Ear and labyrinth disorders                                         | mild                               | 10 ( 0.7%)             | 7 ( 0.5%)              | 17 ( 0.6%)             |
|                                                                     | moderate                           | 4 ( 0.3%)              | 6 ( 0.4%)              | 10 ( 0.3%)             |
|                                                                     | severe                             | 2 ( 0.1%)              | 1 ( <0.1%)             | 3 ( 0.1%)              |
| Deafness bilateral                                                  | severe                             | 1 ( <0.1%)             | 0                      | 1 ( <0.1%)             |
| Ear pain                                                            | mild                               | 0                      | 2 ( 0.1%)              | 2 ( <0.1%)             |
|                                                                     | moderate                           | 0                      | 1 ( <0.1%)             | 1 ( <0.1%)             |
| Ear pruritus                                                        | mild                               | 1 ( <0.1%)             | 0                      | 1 ( <0.1%)             |
| Meniere's disease                                                   | moderate                           | 0                      | 1 ( <0.1%)             | 1 ( <0.1%)             |
| Middle ear effusion                                                 | mild                               | 0                      | 2 ( 0.1%)              | 2 ( <0.1%)             |

**Table 14.3.1 / 16: Number of subjects with adverse events by maximum intensity, primary system organ class and preferred term (FAS)**

| Primary system organ class<br>Preferred term<br>MedDRA version 14.0 | Maximum AE<br>maximum<br>intensity | LCS12<br>N=1432 (100%) | LCS16<br>N=1452 (100%) | Total<br>N=2884 (100%) |
|---------------------------------------------------------------------|------------------------------------|------------------------|------------------------|------------------------|
| Motion sickness                                                     | mild                               | 4 ( 0.3%)              | 2 ( 0.1%)              | 6 ( 0.2%)              |
|                                                                     | moderate                           | 0                      | 1 (<0.1%)              | 1 (<0.1%)              |
| Otorrhoea                                                           | moderate                           | 1 (<0.1%)              | 1 (<0.1%)              | 2 (<0.1%)              |
| Sudden hearing loss                                                 | moderate                           | 1 (<0.1%)              | 0                      | 1 (<0.1%)              |
| Tinnitus                                                            | mild                               | 2 ( 0.1%)              | 0                      | 2 (<0.1%)              |
| Tympanic membrane perforation                                       | moderate                           | 1 (<0.1%)              | 0                      | 1 (<0.1%)              |
|                                                                     | severe                             | 1 (<0.1%)              | 0                      | 1 (<0.1%)              |
| Vertigo                                                             | mild                               | 3 ( 0.2%)              | 3 ( 0.2%)              | 6 ( 0.2%)              |
|                                                                     | moderate                           | 1 (<0.1%)              | 2 ( 0.1%)              | 3 ( 0.1%)              |
|                                                                     | severe                             | 0                      | 1 (<0.1%)              | 1 (<0.1%)              |
| Vertigo labyrinthine                                                | mild                               | 1 (<0.1%)              | 0                      | 1 (<0.1%)              |
| Vertigo positional                                                  | mild                               | 1 (<0.1%)              | 0                      | 1 (<0.1%)              |
|                                                                     | moderate                           | 1 (<0.1%)              | 0                      | 1 (<0.1%)              |
| Endocrine disorders                                                 | mild                               | 8 ( 0.6%)              | 14 ( 1.0%)             | 22 ( 0.8%)             |
|                                                                     | moderate                           | 1 (<0.1%)              | 6 ( 0.4%)              | 7 ( 0.2%)              |
|                                                                     | severe                             | 1 (<0.1%)              | 1 (<0.1%)              | 2 (<0.1%)              |
| Goitre                                                              | mild                               | 1 (<0.1%)              | 2 ( 0.1%)              | 3 ( 0.1%)              |
|                                                                     | moderate                           | 0                      | 3 ( 0.2%)              | 3 ( 0.1%)              |
|                                                                     | severe                             | 1 (<0.1%)              | 0                      | 1 (<0.1%)              |
| Hyperthyroidism                                                     | mild                               | 0                      | 1 (<0.1%)              | 1 (<0.1%)              |
|                                                                     | moderate                           | 0                      | 1 (<0.1%)              | 1 (<0.1%)              |
| Hypothyroidism                                                      | mild                               | 6 ( 0.4%)              | 10 ( 0.7%)             | 16 ( 0.6%)             |
|                                                                     | moderate                           | 1 (<0.1%)              | 2 ( 0.1%)              | 3 ( 0.1%)              |
|                                                                     | severe                             | 0                      | 1 (<0.1%)              | 1 (<0.1%)              |
| Thyroid mass                                                        | mild                               | 0                      | 1 (<0.1%)              | 1 (<0.1%)              |

**Table 14.3.1 / 16: Number of subjects with adverse events by maximum intensity, primary system organ class and preferred term (FAS)**

| Primary system organ class<br>Preferred term<br>MedDRA version 14.0 | Maximum AE<br>maximum<br>intensity | LCS12<br>N=1432 (100%) | LCS16<br>N=1452 (100%) | Total<br>N=2884 (100%) |
|---------------------------------------------------------------------|------------------------------------|------------------------|------------------------|------------------------|
| Thyroiditis                                                         | mild                               | 1 ( <0.1%)             | 0                      | 1 ( <0.1%)             |
| Eye disorders                                                       | mild                               | 9 ( 0.6%)              | 9 ( 0.6%)              | 18 ( 0.6%)             |
|                                                                     | moderate                           | 15 ( 1.0%)             | 13 ( 0.9%)             | 28 ( 1.0%)             |
|                                                                     | severe                             | 1 ( <0.1%)             | 1 ( <0.1%)             | 2 ( <0.1%)             |
| Blepharitis                                                         | mild                               | 0                      | 1 ( <0.1%)             | 1 ( <0.1%)             |
|                                                                     | severe                             | 1 ( <0.1%)             | 1 ( <0.1%)             | 2 ( <0.1%)             |
| Chalazion                                                           | mild                               | 0                      | 1 ( <0.1%)             | 1 ( <0.1%)             |
| Conjunctivitis                                                      | mild                               | 7 ( 0.5%)              | 7 ( 0.5%)              | 14 ( 0.5%)             |
|                                                                     | moderate                           | 8 ( 0.6%)              | 7 ( 0.5%)              | 15 ( 0.5%)             |
|                                                                     | severe                             | 0                      | 1 ( <0.1%)             | 1 ( <0.1%)             |
| Conjunctivitis allergic                                             | moderate                           | 2 ( 0.1%)              | 2 ( 0.1%)              | 4 ( 0.1%)              |
| Dry eye                                                             | moderate                           | 2 ( 0.1%)              | 0                      | 2 ( <0.1%)             |
| Eye inflammation                                                    | moderate                           | 0                      | 1 ( <0.1%)             | 1 ( <0.1%)             |
| Eyelid cyst                                                         | moderate                           | 0                      | 1 ( <0.1%)             | 1 ( <0.1%)             |
| Heterophoria                                                        | moderate                           | 1 ( <0.1%)             | 0                      | 1 ( <0.1%)             |
| Iridocyclitis                                                       | moderate                           | 1 ( <0.1%)             | 0                      | 1 ( <0.1%)             |
| Iritis                                                              | moderate                           | 0                      | 2 ( 0.1%)              | 2 ( <0.1%)             |
| Meibomianitis                                                       | mild                               | 1 ( <0.1%)             | 0                      | 1 ( <0.1%)             |
| Myopia                                                              | moderate                           | 0                      | 1 ( <0.1%)             | 1 ( <0.1%)             |
| Ocular icterus                                                      | mild                               | 0                      | 1 ( <0.1%)             | 1 ( <0.1%)             |
| Panophthalmitis                                                     | mild                               | 1 ( <0.1%)             | 0                      | 1 ( <0.1%)             |

**Table 14.3.1 / 16: Number of subjects with adverse events by maximum intensity, primary system organ class and preferred term (FAS)**

| Primary system organ class<br>Preferred term<br>MedDRA version 14.0 | Maximum AE<br>maximum<br>intensity | LCS12<br>N=1432 (100%) | LCS16<br>N=1452 (100%) | Total<br>N=2884 (100%) |
|---------------------------------------------------------------------|------------------------------------|------------------------|------------------------|------------------------|
| Scotoma                                                             | moderate                           | 1 ( <0.1%)             | 0                      | 1 ( <0.1%)             |
| Vision blurred                                                      | mild                               | 1 ( <0.1%)             | 0                      | 1 ( <0.1%)             |
| Gastrointestinal disorders                                          | mild                               | 129 ( 9.0%)            | 107 ( 7.4%)            | 236 ( 8.2%)            |
|                                                                     | moderate                           | 146 ( 10.2%)           | 172 ( 11.8%)           | 318 ( 11.0%)           |
|                                                                     | severe                             | 59 ( 4.1%)             | 40 ( 2.8%)             | 99 ( 3.4%)             |
| Abdominal adhesions                                                 | severe                             | 1 ( <0.1%)             | 0                      | 1 ( <0.1%)             |
| Abdominal discomfort                                                | mild                               | 3 ( 0.2%)              | 4 ( 0.3%)              | 7 ( 0.2%)              |
|                                                                     | moderate                           | 1 ( <0.1%)             | 2 ( 0.1%)              | 3 ( 0.1%)              |
|                                                                     | severe                             | 1 ( <0.1%)             | 0                      | 1 ( <0.1%)             |
| Abdominal distension                                                | mild                               | 9 ( 0.6%)              | 8 ( 0.6%)              | 17 ( 0.6%)             |
|                                                                     | moderate                           | 11 ( 0.8%)             | 3 ( 0.2%)              | 14 ( 0.5%)             |
|                                                                     | severe                             | 1 ( <0.1%)             | 0                      | 1 ( <0.1%)             |
| Abdominal hernia                                                    | moderate                           | 2 ( 0.1%)              | 0                      | 2 ( <0.1%)             |
| Abdominal mass                                                      | mild                               | 1 ( <0.1%)             | 0                      | 1 ( <0.1%)             |
| Abdominal pain                                                      | mild                               | 27 ( 1.9%)             | 27 ( 1.9%)             | 54 ( 1.9%)             |
|                                                                     | moderate                           | 44 ( 3.1%)             | 55 ( 3.8%)             | 99 ( 3.4%)             |
|                                                                     | severe                             | 28 ( 2.0%)             | 19 ( 1.3%)             | 47 ( 1.6%)             |
| Abdominal pain lower                                                | mild                               | 20 ( 1.4%)             | 14 ( 1.0%)             | 34 ( 1.2%)             |
|                                                                     | moderate                           | 38 ( 2.7%)             | 41 ( 2.8%)             | 79 ( 2.7%)             |
|                                                                     | severe                             | 9 ( 0.6%)              | 6 ( 0.4%)              | 15 ( 0.5%)             |
| Abdominal pain upper                                                | mild                               | 3 ( 0.2%)              | 6 ( 0.4%)              | 9 ( 0.3%)              |
|                                                                     | moderate                           | 3 ( 0.2%)              | 4 ( 0.3%)              | 7 ( 0.2%)              |
|                                                                     | severe                             | 1 ( <0.1%)             | 1 ( <0.1%)             | 2 ( <0.1%)             |
| Abdominal tenderness                                                | mild                               | 1 ( <0.1%)             | 0                      | 1 ( <0.1%)             |
|                                                                     | moderate                           | 1 ( <0.1%)             | 0                      | 1 ( <0.1%)             |

**Table 14.3.1 / 16: Number of subjects with adverse events by maximum intensity, primary system organ class and preferred term (FAS)**

| Primary system organ class<br>Preferred term<br>MedDRA version 14.0 | Maximum AE<br>maximum<br>intensity | LCS12<br>N=1432 (100%) | LCS16<br>N=1452 (100%) | Total<br>N=2884 (100%) |
|---------------------------------------------------------------------|------------------------------------|------------------------|------------------------|------------------------|
| Anal fissure                                                        | mild                               | 0                      | 1 (<0.1%)              | 1 (<0.1%)              |
|                                                                     | moderate                           | 0                      | 1 (<0.1%)              | 1 (<0.1%)              |
|                                                                     | severe                             | 1 (<0.1%)              | 0                      | 1 (<0.1%)              |
| Anal pruritus                                                       | mild                               | 2 ( 0.1%)              | 1 (<0.1%)              | 3 ( 0.1%)              |
|                                                                     | moderate                           | 1 (<0.1%)              | 1 (<0.1%)              | 2 (<0.1%)              |
| Anal skin tags                                                      | moderate                           | 0                      | 1 (<0.1%)              | 1 (<0.1%)              |
| Aphthous stomatitis                                                 | severe                             | 0                      | 1 (<0.1%)              | 1 (<0.1%)              |
| Breath odour                                                        | mild                               | 1 (<0.1%)              | 0                      | 1 (<0.1%)              |
| Coeliac disease                                                     | mild                               | 1 (<0.1%)              | 0                      | 1 (<0.1%)              |
| Colitis                                                             | mild                               | 0                      | 1 (<0.1%)              | 1 (<0.1%)              |
|                                                                     | moderate                           | 1 (<0.1%)              | 2 ( 0.1%)              | 3 ( 0.1%)              |
| Colitis ulcerative                                                  | mild                               | 1 (<0.1%)              | 0                      | 1 (<0.1%)              |
|                                                                     | moderate                           | 1 (<0.1%)              | 0                      | 1 (<0.1%)              |
| Colonic polyp                                                       | moderate                           | 1 (<0.1%)              | 0                      | 1 (<0.1%)              |
| Constipation                                                        | mild                               | 7 ( 0.5%)              | 6 ( 0.4%)              | 13 ( 0.5%)             |
|                                                                     | moderate                           | 6 ( 0.4%)              | 9 ( 0.6%)              | 15 ( 0.5%)             |
|                                                                     | severe                             | 3 ( 0.2%)              | 3 ( 0.2%)              | 6 ( 0.2%)              |
| Crohn's disease                                                     | moderate                           | 1 (<0.1%)              | 0                      | 1 (<0.1%)              |
|                                                                     | severe                             | 1 (<0.1%)              | 0                      | 1 (<0.1%)              |
| Dental caries                                                       | mild                               | 1 (<0.1%)              | 0                      | 1 (<0.1%)              |
|                                                                     | moderate                           | 0                      | 3 ( 0.2%)              | 3 ( 0.1%)              |
| Diarrhoea                                                           | mild                               | 11 ( 0.8%)             | 11 ( 0.8%)             | 22 ( 0.8%)             |
|                                                                     | moderate                           | 7 ( 0.5%)              | 14 ( 1.0%)             | 21 ( 0.7%)             |
|                                                                     | severe                             | 1 (<0.1%)              | 2 ( 0.1%)              | 3 ( 0.1%)              |
| Dry mouth                                                           | mild                               | 0                      | 1 (<0.1%)              | 1 (<0.1%)              |



**Table 14.3.1 / 16: Number of subjects with adverse events by maximum intensity, primary system organ class and preferred term (FAS)**

| Primary system organ class<br>Preferred term<br>MedDRA version 14.0 | Maximum AE<br>maximum<br>intensity | LCS12<br>N=1432 (100%) | LCS16<br>N=1452 (100%) | Total<br>N=2884 (100%) |
|---------------------------------------------------------------------|------------------------------------|------------------------|------------------------|------------------------|
| Duodenal ulcer                                                      | mild                               | 1 ( <0.1%)             | 0                      | 1 ( <0.1%)             |
| Dyspepsia                                                           | mild                               | 8 ( 0.6%)              | 6 ( 0.4%)              | 14 ( 0.5%)             |
|                                                                     | moderate                           | 5 ( 0.3%)              | 6 ( 0.4%)              | 11 ( 0.4%)             |
|                                                                     | severe                             | 1 ( <0.1%)             | 0                      | 1 ( <0.1%)             |
| Dysphagia                                                           | moderate                           | 1 ( <0.1%)             | 0                      | 1 ( <0.1%)             |
|                                                                     | severe                             | 0                      | 1 ( <0.1%)             | 1 ( <0.1%)             |
| Flatulence                                                          | mild                               | 2 ( 0.1%)              | 1 ( <0.1%)             | 3 ( 0.1%)              |
|                                                                     | moderate                           | 0                      | 1 ( <0.1%)             | 1 ( <0.1%)             |
| Food poisoning                                                      | moderate                           | 1 ( <0.1%)             | 4 ( 0.3%)              | 5 ( 0.2%)              |
|                                                                     | severe                             | 0                      | 2 ( 0.1%)              | 2 ( <0.1%)             |
| Frequent bowel movements                                            | mild                               | 1 ( <0.1%)             | 0                      | 1 ( <0.1%)             |
|                                                                     | moderate                           | 1 ( <0.1%)             | 0                      | 1 ( <0.1%)             |
| Gastric ulcer                                                       | mild                               | 2 ( 0.1%)              | 0                      | 2 ( <0.1%)             |
|                                                                     | moderate                           | 0                      | 1 ( <0.1%)             | 1 ( <0.1%)             |
| Gastritis                                                           | mild                               | 6 ( 0.4%)              | 6 ( 0.4%)              | 12 ( 0.4%)             |
|                                                                     | moderate                           | 5 ( 0.3%)              | 8 ( 0.6%)              | 13 ( 0.5%)             |
|                                                                     | severe                             | 2 ( 0.1%)              | 2 ( 0.1%)              | 4 ( 0.1%)              |
| Gastrointestinal disorder                                           | moderate                           | 1 ( <0.1%)             | 0                      | 1 ( <0.1%)             |
| Gastrointestinal pain                                               | mild                               | 1 ( <0.1%)             | 0                      | 1 ( <0.1%)             |
|                                                                     | moderate                           | 0                      | 1 ( <0.1%)             | 1 ( <0.1%)             |
| Gastroesophageal reflux disease                                     | mild                               | 4 ( 0.3%)              | 7 ( 0.5%)              | 11 ( 0.4%)             |
|                                                                     | moderate                           | 5 ( 0.3%)              | 4 ( 0.3%)              | 9 ( 0.3%)              |
| Gingival oedema                                                     | mild                               | 1 ( <0.1%)             | 0                      | 1 ( <0.1%)             |
| Gingival recession                                                  | moderate                           | 1 ( <0.1%)             | 0                      | 1 ( <0.1%)             |

**Table 14.3.1 / 16: Number of subjects with adverse events by maximum intensity, primary system organ class and preferred term (FAS)**

| Primary system organ class<br>Preferred term<br>MedDRA version 14.0 | Maximum AE<br>maximum<br>intensity | LCS12<br>N=1432 (100%) | LCS16<br>N=1452 (100%) | Total<br>N=2884 (100%) |
|---------------------------------------------------------------------|------------------------------------|------------------------|------------------------|------------------------|
| Gingivitis                                                          | mild                               | 0                      | 1 (<0.1%)              | 1 (<0.1%)              |
|                                                                     | moderate                           | 1 (<0.1%)              | 0                      | 1 (<0.1%)              |
| Haematochezia                                                       | mild                               | 1 (<0.1%)              | 0                      | 1 (<0.1%)              |
|                                                                     | moderate                           | 0                      | 1 (<0.1%)              | 1 (<0.1%)              |
| Haemorrhoids                                                        | mild                               | 3 ( 0.2%)              | 5 ( 0.3%)              | 8 ( 0.3%)              |
|                                                                     | moderate                           | 3 ( 0.2%)              | 3 ( 0.2%)              | 6 ( 0.2%)              |
|                                                                     | severe                             | 1 (<0.1%)              | 0                      | 1 (<0.1%)              |
| Hiatus hernia                                                       | moderate                           | 0                      | 1 (<0.1%)              | 1 (<0.1%)              |
| Hyperchlorhydria                                                    | mild                               | 2 ( 0.1%)              | 1 (<0.1%)              | 3 ( 0.1%)              |
| Impaired gastric emptying                                           | severe                             | 1 (<0.1%)              | 0                      | 1 (<0.1%)              |
| Inflammatory bowel disease                                          | mild                               | 0                      | 1 (<0.1%)              | 1 (<0.1%)              |
| Inguinal hernia                                                     | moderate                           | 1 (<0.1%)              | 0                      | 1 (<0.1%)              |
| Irritable bowel syndrome                                            | mild                               | 8 ( 0.6%)              | 5 ( 0.3%)              | 13 ( 0.5%)             |
|                                                                     | moderate                           | 1 (<0.1%)              | 0                      | 1 (<0.1%)              |
|                                                                     | severe                             | 2 ( 0.1%)              | 0                      | 2 (<0.1%)              |
| Mouth ulceration                                                    | mild                               | 0                      | 1 (<0.1%)              | 1 (<0.1%)              |
|                                                                     | moderate                           | 0                      | 1 (<0.1%)              | 1 (<0.1%)              |
| Nausea                                                              | mild                               | 44 ( 3.1%)             | 31 ( 2.1%)             | 75 ( 2.6%)             |
|                                                                     | moderate                           | 23 ( 1.6%)             | 25 ( 1.7%)             | 48 ( 1.7%)             |
|                                                                     | severe                             | 7 ( 0.5%)              | 1 (<0.1%)              | 8 ( 0.3%)              |
| Odynophagia                                                         | severe                             | 0                      | 1 (<0.1%)              | 1 (<0.1%)              |
| Oesophageal stenosis                                                | moderate                           | 0                      | 1 (<0.1%)              | 1 (<0.1%)              |
| Oesophagitis                                                        | mild                               | 1 (<0.1%)              | 0                      | 1 (<0.1%)              |
| Oral pain                                                           | moderate                           | 0                      | 1 (<0.1%)              | 1 (<0.1%)              |

**Table 14.3.1 / 16: Number of subjects with adverse events by maximum intensity, primary system organ class and preferred term (FAS)**

| Primary system organ class<br>Preferred term<br>MedDRA version 14.0 | Maximum AE<br>maximum<br>intensity | LCS12<br>N=1432 (100%) | LCS16<br>N=1452 (100%) | Total<br>N=2884 (100%) |
|---------------------------------------------------------------------|------------------------------------|------------------------|------------------------|------------------------|
| Peptic ulcer                                                        | moderate                           | 1 ( <0.1%)             | 0                      | 1 ( <0.1%)             |
| Periodontitis                                                       | mild                               | 2 ( 0.1%)              | 0                      | 2 ( <0.1%)             |
|                                                                     | moderate                           | 0                      | 1 ( <0.1%)             | 1 ( <0.1%)             |
| Peritonitis                                                         | severe                             | 1 ( <0.1%)             | 0                      | 1 ( <0.1%)             |
| Proctalgia                                                          | moderate                           | 2 ( 0.1%)              | 1 ( <0.1%)             | 3 ( 0.1%)              |
| Rectal haemorrhage                                                  | mild                               | 0                      | 1 ( <0.1%)             | 1 ( <0.1%)             |
|                                                                     | moderate                           | 0                      | 2 ( 0.1%)              | 2 ( <0.1%)             |
| Reflux oesophagitis                                                 | moderate                           | 0                      | 1 ( <0.1%)             | 1 ( <0.1%)             |
| Salivary gland calculus                                             | severe                             | 0                      | 1 ( <0.1%)             | 1 ( <0.1%)             |
| Tooth disorder                                                      | mild                               | 1 ( <0.1%)             | 1 ( <0.1%)             | 2 ( <0.1%)             |
|                                                                     | moderate                           | 2 ( 0.1%)              | 0                      | 2 ( <0.1%)             |
| Tooth impacted                                                      | mild                               | 1 ( <0.1%)             | 0                      | 1 ( <0.1%)             |
|                                                                     | moderate                           | 1 ( <0.1%)             | 0                      | 1 ( <0.1%)             |
| Toothache                                                           | mild                               | 2 ( 0.1%)              | 9 ( 0.6%)              | 11 ( 0.4%)             |
|                                                                     | moderate                           | 10 ( 0.7%)             | 13 ( 0.9%)             | 23 ( 0.8%)             |
|                                                                     | severe                             | 5 ( 0.3%)              | 4 ( 0.3%)              | 9 ( 0.3%)              |
| Umbilical hernia                                                    | moderate                           | 0                      | 1 ( <0.1%)             | 1 ( <0.1%)             |
| Vomiting                                                            | mild                               | 7 ( 0.5%)              | 9 ( 0.6%)              | 16 ( 0.6%)             |
|                                                                     | moderate                           | 8 ( 0.6%)              | 14 ( 1.0%)             | 22 ( 0.8%)             |
|                                                                     | severe                             | 2 ( 0.1%)              | 1 ( <0.1%)             | 3 ( 0.1%)              |
| General disorders and administration site conditions                | mild                               | 60 ( 4.2%)             | 70 ( 4.8%)             | 130 ( 4.5%)            |
|                                                                     | moderate                           | 41 ( 2.9%)             | 37 ( 2.5%)             | 78 ( 2.7%)             |
|                                                                     | severe                             | 10 ( 0.7%)             | 10 ( 0.7%)             | 20 ( 0.7%)             |
| Asthenia                                                            | mild                               | 1 ( <0.1%)             | 0                      | 1 ( <0.1%)             |
|                                                                     | moderate                           | 1 ( <0.1%)             | 1 ( <0.1%)             | 2 ( <0.1%)             |

**Table 14.3.1 / 16: Number of subjects with adverse events by maximum intensity, primary system organ class and preferred term (FAS)**

| Primary system organ class<br>Preferred term<br>MedDRA version 14.0 | Maximum AE<br>maximum<br>intensity | LCS12<br>N=1432 (100%) | LCS16<br>N=1452 (100%) | Total<br>N=2884 (100%) |
|---------------------------------------------------------------------|------------------------------------|------------------------|------------------------|------------------------|
| Axillary pain                                                       | mild                               | 1 ( <0.1%)             | 0                      | 1 ( <0.1%)             |
|                                                                     | severe                             | 0                      | 1 ( <0.1%)             | 1 ( <0.1%)             |
| Chest pain                                                          | mild                               | 1 ( <0.1%)             | 4 ( 0.3%)              | 5 ( 0.2%)              |
|                                                                     | moderate                           | 2 ( 0.1%)              | 3 ( 0.2%)              | 5 ( 0.2%)              |
|                                                                     | severe                             | 2 ( 0.1%)              | 0                      | 2 ( <0.1%)             |
| Chills                                                              | mild                               | 0                      | 1 ( <0.1%)             | 1 ( <0.1%)             |
|                                                                     | moderate                           | 0                      | 1 ( <0.1%)             | 1 ( <0.1%)             |
| Cyst                                                                | mild                               | 3 ( 0.2%)              | 1 ( <0.1%)             | 4 ( 0.1%)              |
| Device dislocation                                                  | mild                               | 3 ( 0.2%)              | 2 ( 0.1%)              | 5 ( 0.2%)              |
|                                                                     | moderate                           | 0                      | 3 ( 0.2%)              | 3 ( 0.1%)              |
| Device expulsion                                                    | mild                               | 34 ( 2.4%)             | 28 ( 1.9%)             | 62 ( 2.1%)             |
|                                                                     | moderate                           | 6 ( 0.4%)              | 1 ( <0.1%)             | 7 ( 0.2%)              |
|                                                                     | severe                             | 4 ( 0.3%)              | 6 ( 0.4%)              | 10 ( 0.3%)             |
| Discomfort                                                          | mild                               | 1 ( <0.1%)             | 1 ( <0.1%)             | 2 ( <0.1%)             |
|                                                                     | moderate                           | 1 ( <0.1%)             | 0                      | 1 ( <0.1%)             |
| Drug withdrawal syndrome                                            | severe                             | 1 ( <0.1%)             | 0                      | 1 ( <0.1%)             |
| Fatigue                                                             | mild                               | 5 ( 0.3%)              | 16 ( 1.1%)             | 21 ( 0.7%)             |
|                                                                     | moderate                           | 17 ( 1.2%)             | 9 ( 0.6%)              | 26 ( 0.9%)             |
|                                                                     | severe                             | 2 ( 0.1%)              | 2 ( 0.1%)              | 4 ( 0.1%)              |
| Feeling cold                                                        | mild                               | 0                      | 2 ( 0.1%)              | 2 ( <0.1%)             |
| Feeling hot                                                         | mild                               | 0                      | 1 ( <0.1%)             | 1 ( <0.1%)             |
| Generalised oedema                                                  | moderate                           | 1 ( <0.1%)             | 0                      | 1 ( <0.1%)             |
| Hangover                                                            | moderate                           | 1 ( <0.1%)             | 0                      | 1 ( <0.1%)             |
| Hunger                                                              | severe                             | 0                      | 1 ( <0.1%)             | 1 ( <0.1%)             |

**Table 14.3.1 / 16: Number of subjects with adverse events by maximum intensity, primary system organ class and preferred term (FAS)**

| Primary system organ class<br>Preferred term<br>MedDRA version 14.0 | Maximum AE<br>maximum<br>intensity | LCS12<br>N=1432 (100%) | LCS16<br>N=1452 (100%) | Total<br>N=2884 (100%) |
|---------------------------------------------------------------------|------------------------------------|------------------------|------------------------|------------------------|
| Inflammation                                                        | mild                               | 0                      | 1 (<0.1%)              | 1 (<0.1%)              |
|                                                                     | moderate                           | 1 (<0.1%)              | 0                      | 1 (<0.1%)              |
| Influenza like illness                                              | moderate                           | 1 (<0.1%)              | 1 (<0.1%)              | 2 (<0.1%)              |
| Injury associated with device                                       | mild                               | 0                      | 1 (<0.1%)              | 1 (<0.1%)              |
| Irritability                                                        | mild                               | 2 ( 0.1%)              | 1 (<0.1%)              | 3 ( 0.1%)              |
|                                                                     | moderate                           | 0                      | 5 ( 0.3%)              | 5 ( 0.2%)              |
| Localised oedema                                                    | mild                               | 0                      | 1 (<0.1%)              | 1 (<0.1%)              |
| Malaise                                                             | moderate                           | 0                      | 1 (<0.1%)              | 1 (<0.1%)              |
| Oedema                                                              | mild                               | 0                      | 1 (<0.1%)              | 1 (<0.1%)              |
| Oedema peripheral                                                   | mild                               | 1 (<0.1%)              | 5 ( 0.3%)              | 6 ( 0.2%)              |
|                                                                     | moderate                           | 3 ( 0.2%)              | 1 (<0.1%)              | 4 ( 0.1%)              |
| Pain                                                                | mild                               | 4 ( 0.3%)              | 1 (<0.1%)              | 5 ( 0.2%)              |
|                                                                     | moderate                           | 1 (<0.1%)              | 4 ( 0.3%)              | 5 ( 0.2%)              |
|                                                                     | severe                             | 1 (<0.1%)              | 0                      | 1 (<0.1%)              |
| Pyrexia                                                             | mild                               | 8 ( 0.6%)              | 7 ( 0.5%)              | 15 ( 0.5%)             |
|                                                                     | moderate                           | 10 ( 0.7%)             | 9 ( 0.6%)              | 19 ( 0.7%)             |
| Vaccination site pain                                               | mild                               | 1 (<0.1%)              | 1 (<0.1%)              | 2 (<0.1%)              |
| Hepatobiliary disorders                                             | mild                               | 2 ( 0.1%)              | 2 ( 0.1%)              | 4 ( 0.1%)              |
|                                                                     | moderate                           | 2 ( 0.1%)              | 5 ( 0.3%)              | 7 ( 0.2%)              |
|                                                                     | severe                             | 4 ( 0.3%)              | 4 ( 0.3%)              | 8 ( 0.3%)              |
| Biliary colic                                                       | moderate                           | 0                      | 1 (<0.1%)              | 1 (<0.1%)              |
|                                                                     | severe                             | 0                      | 1 (<0.1%)              | 1 (<0.1%)              |
| Biliary dyskinesia                                                  | moderate                           | 1 (<0.1%)              | 0                      | 1 (<0.1%)              |
|                                                                     | severe                             | 0                      | 1 (<0.1%)              | 1 (<0.1%)              |

**Table 14.3.1 / 16: Number of subjects with adverse events by maximum intensity, primary system organ class and preferred term (FAS)**

| Primary system organ class<br>Preferred term<br>MedDRA version 14.0 | Maximum AE<br>maximum<br>intensity | LCS12<br>N=1432 (100%) | LCS16<br>N=1452 (100%) | Total<br>N=2884 (100%) |
|---------------------------------------------------------------------|------------------------------------|------------------------|------------------------|------------------------|
| Cholecystitis                                                       | moderate                           | 1 ( <0.1%)             | 1 ( <0.1%)             | 2 ( <0.1%)             |
|                                                                     | severe                             | 2 ( 0.1%)              | 1 ( <0.1%)             | 3 ( 0.1%)              |
| Cholecystitis chronic                                               | mild                               | 1 ( <0.1%)             | 0                      | 1 ( <0.1%)             |
|                                                                     | severe                             | 1 ( <0.1%)             | 0                      | 1 ( <0.1%)             |
| Cholelithiasis                                                      | mild                               | 1 ( <0.1%)             | 0                      | 1 ( <0.1%)             |
|                                                                     | moderate                           | 2 ( 0.1%)              | 3 ( 0.2%)              | 5 ( 0.2%)              |
|                                                                     | severe                             | 1 ( <0.1%)             | 1 ( <0.1%)             | 2 ( <0.1%)             |
| Gallbladder pain                                                    | moderate                           | 0                      | 1 ( <0.1%)             | 1 ( <0.1%)             |
| Gallbladder polyp                                                   | moderate                           | 1 ( <0.1%)             | 0                      | 1 ( <0.1%)             |
| Hepatic steatosis                                                   | mild                               | 0                      | 1 ( <0.1%)             | 1 ( <0.1%)             |
| Hyperbilirubinaemia                                                 | mild                               | 0                      | 1 ( <0.1%)             | 1 ( <0.1%)             |
| Immune system disorders                                             | mild                               | 31 ( 2.2%)             | 40 ( 2.8%)             | 71 ( 2.5%)             |
|                                                                     | moderate                           | 30 ( 2.1%)             | 24 ( 1.7%)             | 54 ( 1.9%)             |
|                                                                     | severe                             | 2 ( 0.1%)              | 2 ( 0.1%)              | 4 ( 0.1%)              |
| Allergy to animal                                                   | mild                               | 0                      | 2 ( 0.1%)              | 2 ( <0.1%)             |
|                                                                     | moderate                           | 1 ( <0.1%)             | 0                      | 1 ( <0.1%)             |
| Allergy to arthropod bite                                           | moderate                           | 1 ( <0.1%)             | 1 ( <0.1%)             | 2 ( <0.1%)             |
| Allergy to arthropod sting                                          | moderate                           | 0                      | 1 ( <0.1%)             | 1 ( <0.1%)             |
| Allergy to chemicals                                                | mild                               | 1 ( <0.1%)             | 0                      | 1 ( <0.1%)             |
| Anaphylactic reaction                                               | severe                             | 0                      | 1 ( <0.1%)             | 1 ( <0.1%)             |
| Drug hypersensitivity                                               | mild                               | 4 ( 0.3%)              | 1 ( <0.1%)             | 5 ( 0.2%)              |
|                                                                     | moderate                           | 4 ( 0.3%)              | 5 ( 0.3%)              | 9 ( 0.3%)              |
|                                                                     | severe                             | 1 ( <0.1%)             | 0                      | 1 ( <0.1%)             |

**Table 14.3.1 / 16: Number of subjects with adverse events by maximum intensity, primary system organ class and preferred term (FAS)**

| Primary system organ class<br>Preferred term<br>MedDRA version 14.0 | Maximum AE<br>maximum<br>intensity | LCS12<br>N=1432 (100%) | LCS16<br>N=1452 (100%) | Total<br>N=2884 (100%) |
|---------------------------------------------------------------------|------------------------------------|------------------------|------------------------|------------------------|
| Food allergy                                                        | mild                               | 0                      | 1 (<0.1%)              | 1 (<0.1%)              |
|                                                                     | moderate                           | 1 (<0.1%)              | 0                      | 1 (<0.1%)              |
| Hypersensitivity                                                    | mild                               | 5 ( 0.3%)              | 4 ( 0.3%)              | 9 ( 0.3%)              |
|                                                                     | moderate                           | 7 ( 0.5%)              | 6 ( 0.4%)              | 13 ( 0.5%)             |
|                                                                     | severe                             | 1 (<0.1%)              | 1 (<0.1%)              | 2 (<0.1%)              |
| Seasonal allergy                                                    | mild                               | 23 ( 1.6%)             | 32 ( 2.2%)             | 55 ( 1.9%)             |
|                                                                     | moderate                           | 16 ( 1.1%)             | 12 ( 0.8%)             | 28 ( 1.0%)             |
| Infections and infestations                                         | mild                               | 270 ( 18.9%)           | 290 ( 20.0%)           | 560 ( 19.4%)           |
|                                                                     | moderate                           | 389 ( 27.2%)           | 392 ( 27.0%)           | 781 ( 27.1%)           |
|                                                                     | severe                             | 63 ( 4.4%)             | 54 ( 3.7%)             | 117 ( 4.1%)            |
| Abscess limb                                                        | mild                               | 0                      | 1 (<0.1%)              | 1 (<0.1%)              |
| Acarodermatitis                                                     | moderate                           | 1 (<0.1%)              | 0                      | 1 (<0.1%)              |
|                                                                     | severe                             | 1 (<0.1%)              | 0                      | 1 (<0.1%)              |
| Acute sinusitis                                                     | mild                               | 3 ( 0.2%)              | 1 (<0.1%)              | 4 ( 0.1%)              |
|                                                                     | moderate                           | 4 ( 0.3%)              | 2 ( 0.1%)              | 6 ( 0.2%)              |
| Acute tonsillitis                                                   | mild                               | 6 ( 0.4%)              | 4 ( 0.3%)              | 10 ( 0.3%)             |
|                                                                     | moderate                           | 4 ( 0.3%)              | 1 (<0.1%)              | 5 ( 0.2%)              |
| Anogenital warts                                                    | mild                               | 7 ( 0.5%)              | 8 ( 0.6%)              | 15 ( 0.5%)             |
|                                                                     | moderate                           | 3 ( 0.2%)              | 2 ( 0.1%)              | 5 ( 0.2%)              |
|                                                                     | severe                             | 1 (<0.1%)              | 0                      | 1 (<0.1%)              |
| Appendicitis                                                        | moderate                           | 2 ( 0.1%)              | 1 (<0.1%)              | 3 ( 0.1%)              |
|                                                                     | severe                             | 4 ( 0.3%)              | 6 ( 0.4%)              | 10 ( 0.3%)             |
| Arthritis rubella                                                   | moderate                           | 1 (<0.1%)              | 0                      | 1 (<0.1%)              |
| Bartholin's abscess                                                 | mild                               | 2 ( 0.1%)              | 0                      | 2 (<0.1%)              |
|                                                                     | moderate                           | 1 (<0.1%)              | 0                      | 1 (<0.1%)              |
| Blastocystis infection                                              | moderate                           | 0                      | 1 (<0.1%)              | 1 (<0.1%)              |

**Table 14.3.1 / 16: Number of subjects with adverse events by maximum intensity, primary system organ class and preferred term (FAS)**

| Primary system organ class<br>Preferred term<br>MedDRA version 14.0 | Maximum AE<br>maximum<br>intensity | LCS12<br>N=1432 (100%) | LCS16<br>N=1452 (100%) | Total<br>N=2884 (100%) |
|---------------------------------------------------------------------|------------------------------------|------------------------|------------------------|------------------------|
| Body tinea                                                          | mild                               | 1 ( <0.1%)             | 2 ( 0.1%)              | 3 ( 0.1%)              |
|                                                                     | moderate                           | 1 ( <0.1%)             | 0                      | 1 ( <0.1%)             |
| Breast abscess                                                      | moderate                           | 1 ( <0.1%)             | 0                      | 1 ( <0.1%)             |
| Bronchitis                                                          | mild                               | 21 ( 1.5%)             | 13 ( 0.9%)             | 34 ( 1.2%)             |
|                                                                     | moderate                           | 36 ( 2.5%)             | 23 ( 1.6%)             | 59 ( 2.0%)             |
|                                                                     | severe                             | 1 ( <0.1%)             | 2 ( 0.1%)              | 3 ( 0.1%)              |
| Bronchitis viral                                                    | mild                               | 1 ( <0.1%)             | 0                      | 1 ( <0.1%)             |
| Bronchopneumonia                                                    | severe                             | 1 ( <0.1%)             | 0                      | 1 ( <0.1%)             |
| Bursitis infective                                                  | mild                               | 1 ( <0.1%)             | 0                      | 1 ( <0.1%)             |
| Campylobacter infection                                             | moderate                           | 1 ( <0.1%)             | 0                      | 1 ( <0.1%)             |
| Campylobacter intestinal infection                                  | severe                             | 0                      | 1 ( <0.1%)             | 1 ( <0.1%)             |
| Candidiasis                                                         | mild                               | 8 ( 0.6%)              | 7 ( 0.5%)              | 15 ( 0.5%)             |
|                                                                     | moderate                           | 2 ( 0.1%)              | 1 ( <0.1%)             | 3 ( 0.1%)              |
|                                                                     | severe                             | 1 ( <0.1%)             | 1 ( <0.1%)             | 2 ( <0.1%)             |
| Carbuncle                                                           | mild                               | 0                      | 1 ( <0.1%)             | 1 ( <0.1%)             |
| Cellulitis                                                          | mild                               | 0                      | 1 ( <0.1%)             | 1 ( <0.1%)             |
|                                                                     | moderate                           | 2 ( 0.1%)              | 2 ( 0.1%)              | 4 ( 0.1%)              |
|                                                                     | severe                             | 1 ( <0.1%)             | 1 ( <0.1%)             | 2 ( <0.1%)             |
| Cervicitis                                                          | mild                               | 4 ( 0.3%)              | 10 ( 0.7%)             | 14 ( 0.5%)             |
|                                                                     | moderate                           | 1 ( <0.1%)             | 4 ( 0.3%)              | 5 ( 0.2%)              |
|                                                                     | severe                             | 0                      | 1 ( <0.1%)             | 1 ( <0.1%)             |
| Cervicitis gonococcal                                               | mild                               | 1 ( <0.1%)             | 0                      | 1 ( <0.1%)             |
| Chlamydial cervicitis                                               | mild                               | 2 ( 0.1%)              | 4 ( 0.3%)              | 6 ( 0.2%)              |
|                                                                     | moderate                           | 0                      | 2 ( 0.1%)              | 2 ( <0.1%)             |



**Table 14.3.1 / 16: Number of subjects with adverse events by maximum intensity, primary system organ class and preferred term (FAS)**

| Primary system organ class<br>Preferred term<br>MedDRA version 14.0 | Maximum AE<br>maximum<br>intensity | LCS12<br>N=1432 (100%) | LCS16<br>N=1452 (100%) | Total<br>N=2884 (100%) |
|---------------------------------------------------------------------|------------------------------------|------------------------|------------------------|------------------------|
| Chlamydial infection                                                | mild                               | 1 ( <0.1%)             | 3 ( 0.2%)              | 4 ( 0.1%)              |
|                                                                     | moderate                           | 0                      | 1 ( <0.1%)             | 1 ( <0.1%)             |
| Chronic tonsillitis                                                 | moderate                           | 0                      | 1 ( <0.1%)             | 1 ( <0.1%)             |
| Clitoris abscess                                                    | moderate                           | 1 ( <0.1%)             | 0                      | 1 ( <0.1%)             |
| Conjunctivitis bacterial                                            | mild                               | 0                      | 1 ( <0.1%)             | 1 ( <0.1%)             |
|                                                                     | moderate                           | 1 ( <0.1%)             | 1 ( <0.1%)             | 2 ( <0.1%)             |
| Conjunctivitis infective                                            | mild                               | 1 ( <0.1%)             | 0                      | 1 ( <0.1%)             |
|                                                                     | moderate                           | 1 ( <0.1%)             | 0                      | 1 ( <0.1%)             |
| Conjunctivitis viral                                                | mild                               | 1 ( <0.1%)             | 0                      | 1 ( <0.1%)             |
|                                                                     | moderate                           | 0                      | 1 ( <0.1%)             | 1 ( <0.1%)             |
| Coxsackie viral infection                                           | mild                               | 1 ( <0.1%)             | 0                      | 1 ( <0.1%)             |
|                                                                     | moderate                           | 1 ( <0.1%)             | 1 ( <0.1%)             | 2 ( <0.1%)             |
| Cystitis                                                            | mild                               | 11 ( 0.8%)             | 14 ( 1.0%)             | 25 ( 0.9%)             |
|                                                                     | moderate                           | 16 ( 1.1%)             | 10 ( 0.7%)             | 26 ( 0.9%)             |
|                                                                     | severe                             | 3 ( 0.2%)              | 2 ( 0.1%)              | 5 ( 0.2%)              |
| Dengue fever                                                        | mild                               | 1 ( <0.1%)             | 0                      | 1 ( <0.1%)             |
|                                                                     | moderate                           | 1 ( <0.1%)             | 0                      | 1 ( <0.1%)             |
| Diarrhoea infectious                                                | mild                               | 1 ( <0.1%)             | 1 ( <0.1%)             | 2 ( <0.1%)             |
|                                                                     | severe                             | 0                      | 1 ( <0.1%)             | 1 ( <0.1%)             |
| Diverticulitis                                                      | moderate                           | 0                      | 1 ( <0.1%)             | 1 ( <0.1%)             |
|                                                                     | severe                             | 1 ( <0.1%)             | 0                      | 1 ( <0.1%)             |
| Ear infection                                                       | mild                               | 8 ( 0.6%)              | 1 ( <0.1%)             | 9 ( 0.3%)              |
|                                                                     | moderate                           | 16 ( 1.1%)             | 11 ( 0.8%)             | 27 ( 0.9%)             |
|                                                                     | severe                             | 3 ( 0.2%)              | 1 ( <0.1%)             | 4 ( 0.1%)              |
| Ear infection bacterial                                             | moderate                           | 1 ( <0.1%)             | 0                      | 1 ( <0.1%)             |

**Table 14.3.1 / 16: Number of subjects with adverse events by maximum intensity, primary system organ class and preferred term (FAS)**

| Primary system organ class<br>Preferred term<br>MedDRA version 14.0 | Maximum AE<br>maximum<br>intensity | LCS12<br>N=1432 (100%) | LCS16<br>N=1452 (100%) | Total<br>N=2884 (100%) |
|---------------------------------------------------------------------|------------------------------------|------------------------|------------------------|------------------------|
| Endometritis                                                        | mild                               | 5 ( 0.3%)              | 3 ( 0.2%)              | 8 ( 0.3%)              |
|                                                                     | moderate                           | 5 ( 0.3%)              | 8 ( 0.6%)              | 13 ( 0.5%)             |
|                                                                     | severe                             | 1 ( <0.1%)             | 0                      | 1 ( <0.1%)             |
| Enterobiasis                                                        | mild                               | 3 ( 0.2%)              | 0                      | 3 ( 0.1%)              |
|                                                                     | moderate                           | 0                      | 1 ( <0.1%)             | 1 ( <0.1%)             |
| Enterocolitis infectious                                            | moderate                           | 2 ( 0.1%)              | 0                      | 2 ( <0.1%)             |
| Epstein-Barr virus infection                                        | mild                               | 0                      | 1 ( <0.1%)             | 1 ( <0.1%)             |
| Erysipelas                                                          | mild                               | 1 ( <0.1%)             | 0                      | 1 ( <0.1%)             |
| Erythema infectiosum                                                | moderate                           | 1 ( <0.1%)             | 0                      | 1 ( <0.1%)             |
| Escherichia urinary tract infection                                 | mild                               | 0                      | 1 ( <0.1%)             | 1 ( <0.1%)             |
| Escherichia vaginitis                                               | mild                               | 1 ( <0.1%)             | 0                      | 1 ( <0.1%)             |
| Eye infection                                                       | mild                               | 0                      | 1 ( <0.1%)             | 1 ( <0.1%)             |
| Eyelid infection                                                    | mild                               | 1 ( <0.1%)             | 0                      | 1 ( <0.1%)             |
|                                                                     | moderate                           | 0                      | 0                      | 0                      |
| Folliculitis                                                        | mild                               | 3 ( 0.2%)              | 3 ( 0.2%)              | 6 ( 0.2%)              |
|                                                                     | moderate                           | 2 ( 0.1%)              | 3 ( 0.2%)              | 5 ( 0.2%)              |
| Fungal infection                                                    | mild                               | 3 ( 0.2%)              | 7 ( 0.5%)              | 10 ( 0.3%)             |
|                                                                     | moderate                           | 2 ( 0.1%)              | 1 ( <0.1%)             | 3 ( 0.1%)              |
| Fungal skin infection                                               | mild                               | 2 ( 0.1%)              | 1 ( <0.1%)             | 3 ( 0.1%)              |
|                                                                     | moderate                           | 1 ( <0.1%)             | 0                      | 1 ( <0.1%)             |
| Furuncle                                                            | mild                               | 1 ( <0.1%)             | 0                      | 1 ( <0.1%)             |
|                                                                     | moderate                           | 0                      | 1 ( <0.1%)             | 1 ( <0.1%)             |
| Gastritis bacterial                                                 | mild                               | 0                      | 1 ( <0.1%)             | 1 ( <0.1%)             |

**Table 14.3.1 / 16: Number of subjects with adverse events by maximum intensity, primary system organ class and preferred term (FAS)**

| Primary system organ class<br>Preferred term<br>MedDRA version 14.0 | Maximum AE<br>maximum<br>intensity | LCS12<br>N=1432 (100%) | LCS16<br>N=1452 (100%) | Total<br>N=2884 (100%) |
|---------------------------------------------------------------------|------------------------------------|------------------------|------------------------|------------------------|
| Gastritis viral                                                     | mild                               | 0                      | 1 (<0.1%)              | 1 (<0.1%)              |
| Gastroenteritis                                                     | mild                               | 9 ( 0.6%)              | 9 ( 0.6%)              | 18 ( 0.6%)             |
|                                                                     | moderate                           | 19 ( 1.3%)             | 18 ( 1.2%)             | 37 ( 1.3%)             |
|                                                                     | severe                             | 3 ( 0.2%)              | 2 ( 0.1%)              | 5 ( 0.2%)              |
| Gastroenteritis rotavirus                                           | mild                               | 0                      | 1 (<0.1%)              | 1 (<0.1%)              |
| Gastroenteritis viral                                               | mild                               | 3 ( 0.2%)              | 2 ( 0.1%)              | 5 ( 0.2%)              |
|                                                                     | moderate                           | 3 ( 0.2%)              | 5 ( 0.3%)              | 8 ( 0.3%)              |
|                                                                     | severe                             | 1 (<0.1%)              | 1 (<0.1%)              | 2 (<0.1%)              |
| Gastrointestinal bacterial infection                                | mild                               | 0                      | 1 (<0.1%)              | 1 (<0.1%)              |
| Gastrointestinal viral infection                                    | mild                               | 0                      | 1 (<0.1%)              | 1 (<0.1%)              |
|                                                                     | moderate                           | 1 (<0.1%)              | 1 (<0.1%)              | 2 (<0.1%)              |
| Genital candidiasis                                                 | mild                               | 1 (<0.1%)              | 1 (<0.1%)              | 2 (<0.1%)              |
|                                                                     | moderate                           | 0                      | 2 ( 0.1%)              | 2 (<0.1%)              |
| Genital herpes                                                      | mild                               | 4 ( 0.3%)              | 4 ( 0.3%)              | 8 ( 0.3%)              |
|                                                                     | moderate                           | 5 ( 0.3%)              | 10 ( 0.7%)             | 15 ( 0.5%)             |
|                                                                     | severe                             | 1 (<0.1%)              | 0                      | 1 (<0.1%)              |
| Genital infection fungal                                            | moderate                           | 1 (<0.1%)              | 0                      | 1 (<0.1%)              |
| Giardiasis                                                          | mild                               | 1 (<0.1%)              | 0                      | 1 (<0.1%)              |
| Gonorrhoea                                                          | mild                               | 0                      | 1 (<0.1%)              | 1 (<0.1%)              |
|                                                                     | moderate                           | 1 (<0.1%)              | 0                      | 1 (<0.1%)              |
| Groin infection                                                     | mild                               | 2 ( 0.1%)              | 0                      | 2 (<0.1%)              |
| Gynaecological chlamydia infection                                  | mild                               | 2 ( 0.1%)              | 3 ( 0.2%)              | 5 ( 0.2%)              |
|                                                                     | moderate                           | 1 (<0.1%)              | 2 ( 0.1%)              | 3 ( 0.1%)              |

**Table 14.3.1 / 16: Number of subjects with adverse events by maximum intensity, primary system organ class and preferred term (FAS)**

| Primary system organ class<br>Preferred term<br>MedDRA version 14.0 | Maximum AE<br>maximum<br>intensity | LCS12<br>N=1432 (100%) | LCS16<br>N=1452 (100%) | Total<br>N=2884 (100%) |
|---------------------------------------------------------------------|------------------------------------|------------------------|------------------------|------------------------|
| H1N1 influenza                                                      | mild                               | 2 ( 0.1%)              | 1 (<0.1%)              | 3 ( 0.1%)              |
|                                                                     | moderate                           | 4 ( 0.3%)              | 4 ( 0.3%)              | 8 ( 0.3%)              |
|                                                                     | severe                             | 1 (<0.1%)              | 0                      | 1 (<0.1%)              |
| Haemophilus infection                                               | mild                               | 0                      | 1 (<0.1%)              | 1 (<0.1%)              |
| Hand-foot-and-mouth disease                                         | moderate                           | 0                      | 1 (<0.1%)              | 1 (<0.1%)              |
| Helicobacter gastritis                                              | mild                               | 1 (<0.1%)              | 1 (<0.1%)              | 2 (<0.1%)              |
| Helicobacter infection                                              | mild                               | 1 (<0.1%)              | 0                      | 1 (<0.1%)              |
| Herpes dermatitis                                                   | moderate                           | 1 (<0.1%)              | 1 (<0.1%)              | 2 (<0.1%)              |
| Herpes simplex                                                      | mild                               | 0                      | 1 (<0.1%)              | 1 (<0.1%)              |
|                                                                     | moderate                           | 0                      | 2 ( 0.1%)              | 2 (<0.1%)              |
|                                                                     | severe                             | 1 (<0.1%)              | 0                      | 1 (<0.1%)              |
| Herpes zoster                                                       | mild                               | 2 ( 0.1%)              | 0                      | 2 (<0.1%)              |
|                                                                     | moderate                           | 4 ( 0.3%)              | 4 ( 0.3%)              | 8 ( 0.3%)              |
|                                                                     | severe                             | 1 (<0.1%)              | 0                      | 1 (<0.1%)              |
| Impetigo                                                            | mild                               | 1 (<0.1%)              | 2 ( 0.1%)              | 3 ( 0.1%)              |
|                                                                     | moderate                           | 3 ( 0.2%)              | 0                      | 3 ( 0.1%)              |
| Infected bites                                                      | mild                               | 2 ( 0.1%)              | 0                      | 2 (<0.1%)              |
| Infected cyst                                                       | mild                               | 0                      | 1 (<0.1%)              | 1 (<0.1%)              |
| Infection                                                           | moderate                           | 0                      | 1 (<0.1%)              | 1 (<0.1%)              |
| Infectious mononucleosis                                            | mild                               | 0                      | 2 ( 0.1%)              | 2 (<0.1%)              |
|                                                                     | moderate                           | 1 (<0.1%)              | 4 ( 0.3%)              | 5 ( 0.2%)              |
| Influenza                                                           | mild                               | 25 ( 1.7%)             | 31 ( 2.1%)             | 56 ( 1.9%)             |
|                                                                     | moderate                           | 42 ( 2.9%)             | 55 ( 3.8%)             | 97 ( 3.4%)             |
|                                                                     | severe                             | 5 ( 0.3%)              | 8 ( 0.6%)              | 13 ( 0.5%)             |

**Table 14.3.1 / 16: Number of subjects with adverse events by maximum intensity, primary system organ class and preferred term (FAS)**

| Primary system organ class<br>Preferred term<br>MedDRA version 14.0 | Maximum AE<br>maximum<br>intensity | LCS12<br>N=1432 (100%) | LCS16<br>N=1452 (100%) | Total<br>N=2884 (100%) |
|---------------------------------------------------------------------|------------------------------------|------------------------|------------------------|------------------------|
| Keratitis viral                                                     | moderate                           | 0                      | 1 (<0.1%)              | 1 (<0.1%)              |
| Kidney infection                                                    | mild                               | 1 (<0.1%)              | 0                      | 1 (<0.1%)              |
|                                                                     | moderate                           | 1 (<0.1%)              | 4 ( 0.3%)              | 5 ( 0.2%)              |
| Labyrinthitis                                                       | moderate                           | 1 (<0.1%)              | 1 (<0.1%)              | 2 (<0.1%)              |
| Laryngitis                                                          | mild                               | 2 ( 0.1%)              | 5 ( 0.3%)              | 7 ( 0.2%)              |
|                                                                     | moderate                           | 4 ( 0.3%)              | 4 ( 0.3%)              | 8 ( 0.3%)              |
|                                                                     | severe                             | 1 (<0.1%)              | 1 (<0.1%)              | 2 (<0.1%)              |
| Laryngitis bacterial                                                | moderate                           | 0                      | 1 (<0.1%)              | 1 (<0.1%)              |
| Localised infection                                                 | mild                               | 3 ( 0.2%)              | 1 (<0.1%)              | 4 ( 0.1%)              |
|                                                                     | moderate                           | 1 (<0.1%)              | 0                      | 1 (<0.1%)              |
|                                                                     | severe                             | 0                      | 1 (<0.1%)              | 1 (<0.1%)              |
| Lower respiratory tract infection                                   | mild                               | 1 (<0.1%)              | 0                      | 1 (<0.1%)              |
|                                                                     | moderate                           | 2 ( 0.1%)              | 1 (<0.1%)              | 3 ( 0.1%)              |
| Lower respiratory tract infection bacterial                         | moderate                           | 1 (<0.1%)              | 0                      | 1 (<0.1%)              |
| Lymph gland infection                                               | moderate                           | 1 (<0.1%)              | 0                      | 1 (<0.1%)              |
| Malaria                                                             | moderate                           | 1 (<0.1%)              | 1 (<0.1%)              | 2 (<0.1%)              |
| Mastitis                                                            | mild                               | 1 (<0.1%)              | 0                      | 1 (<0.1%)              |
|                                                                     | moderate                           | 2 ( 0.1%)              | 1 (<0.1%)              | 3 ( 0.1%)              |
| Meningitis                                                          | moderate                           | 1 (<0.1%)              | 0                      | 1 (<0.1%)              |
| Meningitis viral                                                    | severe                             | 0                      | 1 (<0.1%)              | 1 (<0.1%)              |
| Molluscum contagiosum                                               | mild                               | 0                      | 1 (<0.1%)              | 1 (<0.1%)              |
| Nail infection                                                      | moderate                           | 2 ( 0.1%)              | 1 (<0.1%)              | 3 ( 0.1%)              |

**Table 14.3.1 / 16: Number of subjects with adverse events by maximum intensity, primary system organ class and preferred term (FAS)**

| Primary system organ class<br>Preferred term<br>MedDRA version 14.0 | Maximum AE<br>maximum<br>intensity | LCS12<br>N=1432 (100%) | LCS16<br>N=1452 (100%) | Total<br>N=2884 (100%) |
|---------------------------------------------------------------------|------------------------------------|------------------------|------------------------|------------------------|
| Nasopharyngitis                                                     | mild                               | 65 ( 4.5%)             | 61 ( 4.2%)             | 126 ( 4.4%)            |
|                                                                     | moderate                           | 35 ( 2.4%)             | 45 ( 3.1%)             | 80 ( 2.8%)             |
|                                                                     | severe                             | 3 ( 0.2%)              | 3 ( 0.2%)              | 6 ( 0.2%)              |
| Nipple infection                                                    | moderate                           | 0                      | 1 ( <0.1%)             | 1 ( <0.1%)             |
| Omphalitis                                                          | mild                               | 0                      | 1 ( <0.1%)             | 1 ( <0.1%)             |
| Onychomycosis                                                       | mild                               | 1 ( <0.1%)             | 3 ( 0.2%)              | 4 ( 0.1%)              |
|                                                                     | moderate                           | 2 ( 0.1%)              | 1 ( <0.1%)             | 3 ( 0.1%)              |
| Oophoritis                                                          | mild                               | 0                      | 1 ( <0.1%)             | 1 ( <0.1%)             |
| Oral candidiasis                                                    | mild                               | 0                      | 1 ( <0.1%)             | 1 ( <0.1%)             |
| Oral herpes                                                         | mild                               | 6 ( 0.4%)              | 7 ( 0.5%)              | 13 ( 0.5%)             |
|                                                                     | moderate                           | 5 ( 0.3%)              | 3 ( 0.2%)              | 8 ( 0.3%)              |
| Osteomyelitis                                                       | severe                             | 0                      | 1 ( <0.1%)             | 1 ( <0.1%)             |
| Otitis externa                                                      | mild                               | 0                      | 1 ( <0.1%)             | 1 ( <0.1%)             |
|                                                                     | moderate                           | 0                      | 2 ( 0.1%)              | 2 ( <0.1%)             |
| Otitis media                                                        | mild                               | 0                      | 3 ( 0.2%)              | 3 ( 0.1%)              |
|                                                                     | moderate                           | 5 ( 0.3%)              | 3 ( 0.2%)              | 8 ( 0.3%)              |
| Otitis media acute                                                  | moderate                           | 0                      | 1 ( <0.1%)             | 1 ( <0.1%)             |
| Papilloma viral infection                                           | mild                               | 2 ( 0.1%)              | 1 ( <0.1%)             | 3 ( 0.1%)              |
| Parasitic gastroenteritis                                           | mild                               | 1 ( <0.1%)             | 0                      | 1 ( <0.1%)             |
| Paronychia                                                          | mild                               | 0                      | 2 ( 0.1%)              | 2 ( <0.1%)             |
|                                                                     | moderate                           | 1 ( <0.1%)             | 0                      | 1 ( <0.1%)             |
| Pelvic infection                                                    | mild                               | 0                      | 1 ( <0.1%)             | 1 ( <0.1%)             |

**Table 14.3.1 / 16: Number of subjects with adverse events by maximum intensity, primary system organ class and preferred term (FAS)**

| Primary system organ class<br>Preferred term<br>MedDRA version 14.0 | Maximum AE<br>maximum<br>intensity | LCS12<br>N=1432 (100%) | LCS16<br>N=1452 (100%) | Total<br>N=2884 (100%) |
|---------------------------------------------------------------------|------------------------------------|------------------------|------------------------|------------------------|
| Pelvic inflammatory disease                                         | mild                               | 0                      | 1 (<0.1%)              | 1 (<0.1%)              |
|                                                                     | moderate                           | 3 ( 0.2%)              | 2 ( 0.1%)              | 5 ( 0.2%)              |
|                                                                     | severe                             | 2 ( 0.1%)              | 2 ( 0.1%)              | 4 ( 0.1%)              |
| Peritoneal abscess                                                  | moderate                           | 1 (<0.1%)              | 0                      | 1 (<0.1%)              |
| Peritonsillar abscess                                               | moderate                           | 2 ( 0.1%)              | 0                      | 2 (<0.1%)              |
|                                                                     | severe                             | 0                      | 1 (<0.1%)              | 1 (<0.1%)              |
| Pharyngeal abscess                                                  | moderate                           | 1 (<0.1%)              | 0                      | 1 (<0.1%)              |
| Pharyngitis                                                         | mild                               | 4 ( 0.3%)              | 9 ( 0.6%)              | 13 ( 0.5%)             |
|                                                                     | moderate                           | 9 ( 0.6%)              | 12 ( 0.8%)             | 21 ( 0.7%)             |
| Pharyngitis streptococcal                                           | mild                               | 6 ( 0.4%)              | 10 ( 0.7%)             | 16 ( 0.6%)             |
|                                                                     | moderate                           | 15 ( 1.0%)             | 9 ( 0.6%)              | 24 ( 0.8%)             |
|                                                                     | severe                             | 2 ( 0.1%)              | 2 ( 0.1%)              | 4 ( 0.1%)              |
| Pharyngotonsillitis                                                 | mild                               | 1 (<0.1%)              | 0                      | 1 (<0.1%)              |
| Pilonidal cyst                                                      | moderate                           | 1 (<0.1%)              | 0                      | 1 (<0.1%)              |
| Pneumonia                                                           | mild                               | 1 (<0.1%)              | 1 (<0.1%)              | 2 (<0.1%)              |
|                                                                     | moderate                           | 11 ( 0.8%)             | 11 ( 0.8%)             | 22 ( 0.8%)             |
|                                                                     | severe                             | 2 ( 0.1%)              | 3 ( 0.2%)              | 5 ( 0.2%)              |
| Pneumonia mycoplasmal                                               | moderate                           | 1 (<0.1%)              | 0                      | 1 (<0.1%)              |
| Pogosta disease                                                     | mild                               | 1 (<0.1%)              | 0                      | 1 (<0.1%)              |
| Post procedural infection                                           | moderate                           | 2 ( 0.1%)              | 1 (<0.1%)              | 3 ( 0.1%)              |
|                                                                     | severe                             | 1 (<0.1%)              | 0                      | 1 (<0.1%)              |
| Pulpitis dental                                                     | severe                             | 0                      | 1 (<0.1%)              | 1 (<0.1%)              |
| Pyelonephritis                                                      | mild                               | 1 (<0.1%)              | 0                      | 1 (<0.1%)              |
|                                                                     | moderate                           | 4 ( 0.3%)              | 1 (<0.1%)              | 5 ( 0.2%)              |
|                                                                     | severe                             | 4 ( 0.3%)              | 2 ( 0.1%)              | 6 ( 0.2%)              |

**Table 14.3.1 / 16: Number of subjects with adverse events by maximum intensity, primary system organ class and preferred term (FAS)**

| Primary system organ class<br>Preferred term<br>MedDRA version 14.0 | Maximum AE<br>maximum<br>intensity | LCS12<br>N=1432 (100%) | LCS16<br>N=1452 (100%) | Total<br>N=2884 (100%) |
|---------------------------------------------------------------------|------------------------------------|------------------------|------------------------|------------------------|
| Pyelonephritis acute                                                | moderate                           | 1 ( <0.1%)             | 0                      | 1 ( <0.1%)             |
|                                                                     | severe                             | 1 ( <0.1%)             | 0                      | 1 ( <0.1%)             |
| Q fever                                                             | severe                             | 1 ( <0.1%)             | 0                      | 1 ( <0.1%)             |
| Rash pustular                                                       | mild                               | 0                      | 1 ( <0.1%)             | 1 ( <0.1%)             |
| Respiratory tract infection                                         | mild                               | 4 ( 0.3%)              | 4 ( 0.3%)              | 8 ( 0.3%)              |
|                                                                     | moderate                           | 6 ( 0.4%)              | 11 ( 0.8%)             | 17 ( 0.6%)             |
|                                                                     | severe                             | 0                      | 1 ( <0.1%)             | 1 ( <0.1%)             |
| Respiratory tract infection viral                                   | moderate                           | 2 ( 0.1%)              | 1 ( <0.1%)             | 3 ( 0.1%)              |
| Rhinitis                                                            | mild                               | 5 ( 0.3%)              | 8 ( 0.6%)              | 13 ( 0.5%)             |
|                                                                     | moderate                           | 1 ( <0.1%)             | 4 ( 0.3%)              | 5 ( 0.2%)              |
| Salpingitis                                                         | mild                               | 1 ( <0.1%)             | 0                      | 1 ( <0.1%)             |
| Salpingo-oophoritis                                                 | mild                               | 1 ( <0.1%)             | 3 ( 0.2%)              | 4 ( 0.1%)              |
|                                                                     | moderate                           | 1 ( <0.1%)             | 0                      | 1 ( <0.1%)             |
| Sialoadenitis                                                       | moderate                           | 1 ( <0.1%)             | 0                      | 1 ( <0.1%)             |
| Sinobronchitis                                                      | moderate                           | 0                      | 1 ( <0.1%)             | 1 ( <0.1%)             |
| Sinusitis                                                           | mild                               | 26 ( 1.8%)             | 29 ( 2.0%)             | 55 ( 1.9%)             |
|                                                                     | moderate                           | 62 ( 4.3%)             | 62 ( 4.3%)             | 124 ( 4.3%)            |
|                                                                     | severe                             | 2 ( 0.1%)              | 5 ( 0.3%)              | 7 ( 0.2%)              |
| Skin bacterial infection                                            | mild                               | 0                      | 1 ( <0.1%)             | 1 ( <0.1%)             |
|                                                                     | moderate                           | 1 ( <0.1%)             | 1 ( <0.1%)             | 2 ( <0.1%)             |
| Skin candida                                                        | mild                               | 1 ( <0.1%)             | 0                      | 1 ( <0.1%)             |
| Skin infection                                                      | mild                               | 1 ( <0.1%)             | 3 ( 0.2%)              | 4 ( 0.1%)              |
|                                                                     | moderate                           | 0                      | 3 ( 0.2%)              | 3 ( 0.1%)              |
| Small intestinal bacterial overgrowth                               | moderate                           | 0                      | 1 ( <0.1%)             | 1 ( <0.1%)             |



**Table 14.3.1 / 16: Number of subjects with adverse events by maximum intensity, primary system organ class and preferred term (FAS)**

| Primary system organ class<br>Preferred term<br>MedDRA version 14.0 | Maximum AE<br>maximum<br>intensity | LCS12<br>N=1432 (100%) | LCS16<br>N=1452 (100%) | Total<br>N=2884 (100%) |
|---------------------------------------------------------------------|------------------------------------|------------------------|------------------------|------------------------|
| Staphylococcal infection                                            | moderate                           | 1 ( <0.1%)             | 1 ( <0.1%)             | 2 ( <0.1%)             |
| Staphylococcal skin infection                                       | moderate                           | 1 ( <0.1%)             | 0                      | 1 ( <0.1%)             |
| Streptococcal infection                                             | moderate                           | 1 ( <0.1%)             | 0                      | 1 ( <0.1%)             |
| Streptococcal sepsis                                                | severe                             | 1 ( <0.1%)             | 0                      | 1 ( <0.1%)             |
| Subcutaneous abscess                                                | mild                               | 0                      | 1 ( <0.1%)             | 1 ( <0.1%)             |
|                                                                     | moderate                           | 3 ( 0.2%)              | 0                      | 3 ( 0.1%)              |
|                                                                     | severe                             | 0                      | 1 ( <0.1%)             | 1 ( <0.1%)             |
| Sweat gland infection                                               | moderate                           | 1 ( <0.1%)             | 0                      | 1 ( <0.1%)             |
| Tinea infection                                                     | mild                               | 1 ( <0.1%)             | 0                      | 1 ( <0.1%)             |
|                                                                     | moderate                           | 0                      | 2 ( 0.1%)              | 2 ( <0.1%)             |
| Tinea pedis                                                         | mild                               | 0                      | 1 ( <0.1%)             | 1 ( <0.1%)             |
|                                                                     | moderate                           | 1 ( <0.1%)             | 0                      | 1 ( <0.1%)             |
| Tinea versicolour                                                   | mild                               | 0                      | 1 ( <0.1%)             | 1 ( <0.1%)             |
| Tonsillitis                                                         | mild                               | 8 ( 0.6%)              | 4 ( 0.3%)              | 12 ( 0.4%)             |
|                                                                     | moderate                           | 16 ( 1.1%)             | 19 ( 1.3%)             | 35 ( 1.2%)             |
|                                                                     | severe                             | 1 ( <0.1%)             | 1 ( <0.1%)             | 2 ( <0.1%)             |
| Tonsillitis streptococcal                                           | moderate                           | 1 ( <0.1%)             | 0                      | 1 ( <0.1%)             |
| Tooth abscess                                                       | mild                               | 0                      | 1 ( <0.1%)             | 1 ( <0.1%)             |
|                                                                     | moderate                           | 3 ( 0.2%)              | 2 ( 0.1%)              | 5 ( 0.2%)              |
|                                                                     | severe                             | 2 ( 0.1%)              | 1 ( <0.1%)             | 3 ( 0.1%)              |
| Tooth infection                                                     | mild                               | 12 ( 0.8%)             | 4 ( 0.3%)              | 16 ( 0.6%)             |
|                                                                     | moderate                           | 10 ( 0.7%)             | 9 ( 0.6%)              | 19 ( 0.7%)             |
|                                                                     | severe                             | 3 ( 0.2%)              | 2 ( 0.1%)              | 5 ( 0.2%)              |
| Tracheitis                                                          | moderate                           | 1 ( <0.1%)             | 0                      | 1 ( <0.1%)             |

**Table 14.3.1 / 16: Number of subjects with adverse events by maximum intensity, primary system organ class and preferred term (FAS)**

| Primary system organ class<br>Preferred term<br>MedDRA version 14.0 | Maximum AE<br>maximum<br>intensity | LCS12<br>N=1432 (100%) | LCS16<br>N=1452 (100%) | Total<br>N=2884 (100%) |
|---------------------------------------------------------------------|------------------------------------|------------------------|------------------------|------------------------|
| Trichomoniasis                                                      | mild                               | 2 ( 0.1%)              | 1 (<0.1%)              | 3 ( 0.1%)              |
|                                                                     | moderate                           | 0                      | 1 (<0.1%)              | 1 (<0.1%)              |
| Tuberculosis                                                        | moderate                           | 1 (<0.1%)              | 0                      | 1 (<0.1%)              |
| Tubo-ovarian abscess                                                | severe                             | 1 (<0.1%)              | 0                      | 1 (<0.1%)              |
| Typhoid fever                                                       | mild                               | 0                      | 1 (<0.1%)              | 1 (<0.1%)              |
| Upper respiratory tract infection                                   | mild                               | 28 ( 2.0%)             | 32 ( 2.2%)             | 60 ( 2.1%)             |
|                                                                     | moderate                           | 22 ( 1.5%)             | 24 ( 1.7%)             | 46 ( 1.6%)             |
|                                                                     | severe                             | 1 (<0.1%)              | 1 (<0.1%)              | 2 (<0.1%)              |
| Ureaplasma infection                                                | mild                               | 1 (<0.1%)              | 0                      | 1 (<0.1%)              |
| Urinary tract infection                                             | mild                               | 71 ( 5.0%)             | 70 ( 4.8%)             | 141 ( 4.9%)            |
|                                                                     | moderate                           | 79 ( 5.5%)             | 73 ( 5.0%)             | 152 ( 5.3%)            |
|                                                                     | severe                             | 8 ( 0.6%)              | 2 ( 0.1%)              | 10 ( 0.3%)             |
| Uterine infection                                                   | severe                             | 0                      | 1 (<0.1%)              | 1 (<0.1%)              |
| Vaginal infection                                                   | mild                               | 28 ( 2.0%)             | 36 ( 2.5%)             | 64 ( 2.2%)             |
|                                                                     | moderate                           | 19 ( 1.3%)             | 22 ( 1.5%)             | 41 ( 1.4%)             |
|                                                                     | severe                             | 1 (<0.1%)              | 2 ( 0.1%)              | 3 ( 0.1%)              |
| Vaginitis bacterial                                                 | mild                               | 73 ( 5.1%)             | 84 ( 5.8%)             | 157 ( 5.4%)            |
|                                                                     | moderate                           | 30 ( 2.1%)             | 43 ( 3.0%)             | 73 ( 2.5%)             |
|                                                                     | severe                             | 2 ( 0.1%)              | 0                      | 2 (<0.1%)              |
| Vaginitis chlamydial                                                | mild                               | 2 ( 0.1%)              | 1 (<0.1%)              | 3 ( 0.1%)              |
| Vaginitis gardnerella                                               | mild                               | 0                      | 3 ( 0.2%)              | 3 ( 0.1%)              |
|                                                                     | moderate                           | 0                      | 1 (<0.1%)              | 1 (<0.1%)              |
| Vestibular neuritis                                                 | moderate                           | 1 (<0.1%)              | 0                      | 1 (<0.1%)              |
|                                                                     | severe                             | 1 (<0.1%)              | 0                      | 1 (<0.1%)              |

**Table 14.3.1 / 16: Number of subjects with adverse events by maximum intensity, primary system organ class and preferred term (FAS)**

| Primary system organ class<br>Preferred term<br>MedDRA version 14.0 | Maximum AE<br>maximum<br>intensity | LCS12<br>N=1432 (100%) | LCS16<br>N=1452 (100%) | Total<br>N=2884 (100%) |
|---------------------------------------------------------------------|------------------------------------|------------------------|------------------------|------------------------|
| Viral infection                                                     | mild                               | 1 ( <0.1%)             | 1 ( <0.1%)             | 2 ( <0.1%)             |
|                                                                     | moderate                           | 2 ( 0.1%)              | 1 ( <0.1%)             | 3 ( 0.1%)              |
|                                                                     | severe                             | 0                      | 1 ( <0.1%)             | 1 ( <0.1%)             |
| Viral pharyngitis                                                   | mild                               | 1 ( <0.1%)             | 1 ( <0.1%)             | 2 ( <0.1%)             |
| Viral rhinitis                                                      | mild                               | 1 ( <0.1%)             | 0                      | 1 ( <0.1%)             |
| Viral upper respiratory tract infection                             | mild                               | 6 ( 0.4%)              | 3 ( 0.2%)              | 9 ( 0.3%)              |
|                                                                     | moderate                           | 9 ( 0.6%)              | 11 ( 0.8%)             | 20 ( 0.7%)             |
| Vulval abscess                                                      | moderate                           | 0                      | 1 ( <0.1%)             | 1 ( <0.1%)             |
| Vulvitis                                                            | mild                               | 4 ( 0.3%)              | 5 ( 0.3%)              | 9 ( 0.3%)              |
|                                                                     | moderate                           | 4 ( 0.3%)              | 2 ( 0.1%)              | 6 ( 0.2%)              |
| Vulvovaginal candidiasis                                            | mild                               | 39 ( 2.7%)             | 48 ( 3.3%)             | 87 ( 3.0%)             |
|                                                                     | moderate                           | 32 ( 2.2%)             | 24 ( 1.7%)             | 56 ( 1.9%)             |
|                                                                     | severe                             | 1 ( <0.1%)             | 0                      | 1 ( <0.1%)             |
| Vulvovaginal mycotic infection                                      | mild                               | 69 ( 4.8%)             | 73 ( 5.0%)             | 142 ( 4.9%)            |
|                                                                     | moderate                           | 28 ( 2.0%)             | 36 ( 2.5%)             | 64 ( 2.2%)             |
|                                                                     | severe                             | 2 ( 0.1%)              | 1 ( <0.1%)             | 3 ( 0.1%)              |
| Vulvovaginitis                                                      | mild                               | 3 ( 0.2%)              | 3 ( 0.2%)              | 6 ( 0.2%)              |
|                                                                     | moderate                           | 2 ( 0.1%)              | 4 ( 0.3%)              | 6 ( 0.2%)              |
|                                                                     | severe                             | 1 ( <0.1%)             | 0                      | 1 ( <0.1%)             |
| Vulvovaginitis chlamydial                                           | moderate                           | 0                      | 1 ( <0.1%)             | 1 ( <0.1%)             |
| Vulvovaginitis streptococcal                                        | mild                               | 0                      | 1 ( <0.1%)             | 1 ( <0.1%)             |
|                                                                     | moderate                           | 1 ( <0.1%)             | 1 ( <0.1%)             | 2 ( <0.1%)             |
| Vulvovaginitis trichomonal                                          | mild                               | 2 ( 0.1%)              | 3 ( 0.2%)              | 5 ( 0.2%)              |
|                                                                     | moderate                           | 1 ( <0.1%)             | 1 ( <0.1%)             | 2 ( <0.1%)             |
|                                                                     | severe                             | 1 ( <0.1%)             | 0                      | 1 ( <0.1%)             |

**Table 14.3.1 / 16: Number of subjects with adverse events by maximum intensity, primary system organ class and preferred term (FAS)**

| Primary system organ class<br>Preferred term<br>MedDRA version 14.0 | Maximum AE<br>maximum<br>intensity | LCS12<br>N=1432 (100%) | LCS16<br>N=1452 (100%) | Total<br>N=2884 (100%) |
|---------------------------------------------------------------------|------------------------------------|------------------------|------------------------|------------------------|
| Wound infection                                                     | mild                               | 2 ( 0.1%)              | 0                      | 2 ( <0.1%)             |
|                                                                     | moderate                           | 1 ( <0.1%)             | 1 ( <0.1%)             | 2 ( <0.1%)             |
| Wound infection staphylococcal                                      | mild                               | 0                      | 1 ( <0.1%)             | 1 ( <0.1%)             |
| Injury, poisoning and procedural complications                      | mild                               | 38 ( 2.7%)             | 35 ( 2.4%)             | 73 ( 2.5%)             |
|                                                                     | moderate                           | 80 ( 5.6%)             | 80 ( 5.5%)             | 160 ( 5.5%)            |
|                                                                     | severe                             | 31 ( 2.2%)             | 18 ( 1.2%)             | 49 ( 1.7%)             |
| Abdominal wound dehiscence                                          | mild                               | 0                      | 1 ( <0.1%)             | 1 ( <0.1%)             |
| Accident                                                            | severe                             | 0                      | 1 ( <0.1%)             | 1 ( <0.1%)             |
| Animal bite                                                         | mild                               | 3 ( 0.2%)              | 2 ( 0.1%)              | 5 ( 0.2%)              |
| Ankle fracture                                                      | mild                               | 0                      | 1 ( <0.1%)             | 1 ( <0.1%)             |
|                                                                     | moderate                           | 0                      | 1 ( <0.1%)             | 1 ( <0.1%)             |
|                                                                     | severe                             | 1 ( <0.1%)             | 0                      | 1 ( <0.1%)             |
| Arthropod bite                                                      | mild                               | 2 ( 0.1%)              | 1 ( <0.1%)             | 3 ( 0.1%)              |
|                                                                     | moderate                           | 2 ( 0.1%)              | 1 ( <0.1%)             | 3 ( 0.1%)              |
|                                                                     | severe                             | 1 ( <0.1%)             | 0                      | 1 ( <0.1%)             |
| Arthropod sting                                                     | moderate                           | 0                      | 2 ( 0.1%)              | 2 ( <0.1%)             |
| Back injury                                                         | moderate                           | 0                      | 1 ( <0.1%)             | 1 ( <0.1%)             |
| Burns second degree                                                 | severe                             | 0                      | 1 ( <0.1%)             | 1 ( <0.1%)             |
| Burns third degree                                                  | severe                             | 1 ( <0.1%)             | 0                      | 1 ( <0.1%)             |
| Cartilage injury                                                    | mild                               | 0                      | 1 ( <0.1%)             | 1 ( <0.1%)             |
| Clavicle fracture                                                   | moderate                           | 1 ( <0.1%)             | 0                      | 1 ( <0.1%)             |
| Concussion                                                          | mild                               | 0                      | 4 ( 0.3%)              | 4 ( 0.1%)              |
|                                                                     | moderate                           | 2 ( 0.1%)              | 2 ( 0.1%)              | 4 ( 0.1%)              |
|                                                                     | severe                             | 1 ( <0.1%)             | 2 ( 0.1%)              | 3 ( 0.1%)              |

**Table 14.3.1 / 16: Number of subjects with adverse events by maximum intensity, primary system organ class and preferred term (FAS)**

| Primary system organ class<br>Preferred term<br>MedDRA version 14.0 | Maximum AE<br>maximum<br>intensity | LCS12<br>N=1432 (100%) | LCS16<br>N=1452 (100%) | Total<br>N=2884 (100%) |
|---------------------------------------------------------------------|------------------------------------|------------------------|------------------------|------------------------|
| Contusion                                                           | mild                               | 2 ( 0.1%)              | 3 ( 0.2%)              | 5 ( 0.2%)              |
|                                                                     | moderate                           | 5 ( 0.3%)              | 2 ( 0.1%)              | 7 ( 0.2%)              |
| Epicondylitis                                                       | mild                               | 1 ( <0.1%)             | 0                      | 1 ( <0.1%)             |
|                                                                     | moderate                           | 1 ( <0.1%)             | 3 ( 0.2%)              | 4 ( 0.1%)              |
|                                                                     | severe                             | 0                      | 1 ( <0.1%)             | 1 ( <0.1%)             |
| Excoriation                                                         | mild                               | 0                      | 1 ( <0.1%)             | 1 ( <0.1%)             |
| Eye injury                                                          | mild                               | 1 ( <0.1%)             | 0                      | 1 ( <0.1%)             |
|                                                                     | moderate                           | 0                      | 1 ( <0.1%)             | 1 ( <0.1%)             |
| Facial bones fracture                                               | mild                               | 1 ( <0.1%)             | 0                      | 1 ( <0.1%)             |
|                                                                     | moderate                           | 1 ( <0.1%)             | 0                      | 1 ( <0.1%)             |
| Fall                                                                | mild                               | 0                      | 1 ( <0.1%)             | 1 ( <0.1%)             |
| Foot fracture                                                       | mild                               | 2 ( 0.1%)              | 1 ( <0.1%)             | 3 ( 0.1%)              |
|                                                                     | moderate                           | 4 ( 0.3%)              | 1 ( <0.1%)             | 5 ( 0.2%)              |
|                                                                     | severe                             | 3 ( 0.2%)              | 1 ( <0.1%)             | 4 ( 0.1%)              |
| Forearm fracture                                                    | severe                             | 1 ( <0.1%)             | 0                      | 1 ( <0.1%)             |
| Frostbite                                                           | moderate                           | 1 ( <0.1%)             | 0                      | 1 ( <0.1%)             |
| Hand fracture                                                       | moderate                           | 1 ( <0.1%)             | 3 ( 0.2%)              | 4 ( 0.1%)              |
| Head injury                                                         | mild                               | 1 ( <0.1%)             | 0                      | 1 ( <0.1%)             |
|                                                                     | moderate                           | 0                      | 1 ( <0.1%)             | 1 ( <0.1%)             |
| Humerus fracture                                                    | moderate                           | 0                      | 1 ( <0.1%)             | 1 ( <0.1%)             |
| Injury                                                              | moderate                           | 0                      | 1 ( <0.1%)             | 1 ( <0.1%)             |
| Joint dislocation                                                   | mild                               | 2 ( 0.1%)              | 1 ( <0.1%)             | 3 ( 0.1%)              |
|                                                                     | moderate                           | 3 ( 0.2%)              | 0                      | 3 ( 0.1%)              |

**Table 14.3.1 / 16: Number of subjects with adverse events by maximum intensity, primary system organ class and preferred term (FAS)**

| Primary system organ class<br>Preferred term<br>MedDRA version 14.0 | Maximum AE<br>maximum<br>intensity | LCS12<br>N=1432 (100%) | LCS16<br>N=1452 (100%) | Total<br>N=2884 (100%) |
|---------------------------------------------------------------------|------------------------------------|------------------------|------------------------|------------------------|
| Joint injury                                                        | mild                               | 2 ( 0.1%)              | 2 ( 0.1%)              | 4 ( 0.1%)              |
|                                                                     | moderate                           | 3 ( 0.2%)              | 4 ( 0.3%)              | 7 ( 0.2%)              |
|                                                                     | severe                             | 2 ( 0.1%)              | 0                      | 2 ( <0.1%)             |
| Joint sprain                                                        | mild                               | 5 ( 0.3%)              | 2 ( 0.1%)              | 7 ( 0.2%)              |
|                                                                     | moderate                           | 5 ( 0.3%)              | 4 ( 0.3%)              | 9 ( 0.3%)              |
|                                                                     | severe                             | 3 ( 0.2%)              | 0                      | 3 ( 0.1%)              |
| Laceration                                                          | mild                               | 1 ( <0.1%)             | 1 ( <0.1%)             | 2 ( <0.1%)             |
|                                                                     | moderate                           | 2 ( 0.1%)              | 1 ( <0.1%)             | 3 ( 0.1%)              |
| Laryngeal injury                                                    | moderate                           | 1 ( <0.1%)             | 0                      | 1 ( <0.1%)             |
| Ligament rupture                                                    | mild                               | 0                      | 1 ( <0.1%)             | 1 ( <0.1%)             |
|                                                                     | moderate                           | 1 ( <0.1%)             | 0                      | 1 ( <0.1%)             |
|                                                                     | severe                             | 2 ( 0.1%)              | 0                      | 2 ( <0.1%)             |
| Ligament sprain                                                     | moderate                           | 0                      | 1 ( <0.1%)             | 1 ( <0.1%)             |
| Limb crushing injury                                                | mild                               | 1 ( <0.1%)             | 0                      | 1 ( <0.1%)             |
| Limb injury                                                         | mild                               | 1 ( <0.1%)             | 2 ( 0.1%)              | 3 ( 0.1%)              |
|                                                                     | moderate                           | 0                      | 2 ( 0.1%)              | 2 ( <0.1%)             |
| Lower limb fracture                                                 | moderate                           | 1 ( <0.1%)             | 0                      | 1 ( <0.1%)             |
| Lumbar vertebral fracture                                           | moderate                           | 0                      | 1 ( <0.1%)             | 1 ( <0.1%)             |
| Meniscus lesion                                                     | mild                               | 1 ( <0.1%)             | 0                      | 1 ( <0.1%)             |
|                                                                     | moderate                           | 2 ( 0.1%)              | 0                      | 2 ( <0.1%)             |
| Muscle injury                                                       | moderate                           | 4 ( 0.3%)              | 1 ( <0.1%)             | 5 ( 0.2%)              |
|                                                                     | severe                             | 1 ( <0.1%)             | 1 ( <0.1%)             | 2 ( <0.1%)             |
| Muscle rupture                                                      | moderate                           | 0                      | 1 ( <0.1%)             | 1 ( <0.1%)             |

**Table 14.3.1 / 16: Number of subjects with adverse events by maximum intensity, primary system organ class and preferred term (FAS)**

| Primary system organ class<br>Preferred term<br>MedDRA version 14.0 | Maximum AE<br>maximum<br>intensity | LCS12<br>N=1432 (100%) | LCS16<br>N=1452 (100%) | Total<br>N=2884 (100%) |
|---------------------------------------------------------------------|------------------------------------|------------------------|------------------------|------------------------|
| Muscle strain                                                       | mild                               | 3 ( 0.2%)              | 3 ( 0.2%)              | 6 ( 0.2%)              |
|                                                                     | moderate                           | 2 ( 0.1%)              | 5 ( 0.3%)              | 7 ( 0.2%)              |
|                                                                     | severe                             | 2 ( 0.1%)              | 2 ( 0.1%)              | 4 ( 0.1%)              |
| Nail avulsion                                                       | severe                             | 1 ( <0.1%)             | 0                      | 1 ( <0.1%)             |
| Overdose                                                            | severe                             | 1 ( <0.1%)             | 0                      | 1 ( <0.1%)             |
| Post concussion syndrome                                            | moderate                           | 0                      | 1 ( <0.1%)             | 1 ( <0.1%)             |
| Post procedural haemorrhage                                         | mild                               | 1 ( <0.1%)             | 1 ( <0.1%)             | 2 ( <0.1%)             |
|                                                                     | moderate                           | 1 ( <0.1%)             | 1 ( <0.1%)             | 2 ( <0.1%)             |
| Post-traumatic pain                                                 | mild                               | 0                      | 1 ( <0.1%)             | 1 ( <0.1%)             |
|                                                                     | moderate                           | 3 ( 0.2%)              | 1 ( <0.1%)             | 4 ( 0.1%)              |
|                                                                     | severe                             | 0                      | 2 ( 0.1%)              | 2 ( <0.1%)             |
| Postoperative ileus                                                 | moderate                           | 0                      | 1 ( <0.1%)             | 1 ( <0.1%)             |
| Procedural pain                                                     | mild                               | 13 ( 0.9%)             | 14 ( 1.0%)             | 27 ( 0.9%)             |
|                                                                     | moderate                           | 35 ( 2.4%)             | 33 ( 2.3%)             | 68 ( 2.4%)             |
|                                                                     | severe                             | 10 ( 0.7%)             | 7 ( 0.5%)              | 17 ( 0.6%)             |
| Procedural vomiting                                                 | severe                             | 1 ( <0.1%)             | 0                      | 1 ( <0.1%)             |
| Radius fracture                                                     | moderate                           | 1 ( <0.1%)             | 1 ( <0.1%)             | 2 ( <0.1%)             |
| Rib fracture                                                        | moderate                           | 1 ( <0.1%)             | 2 ( 0.1%)              | 3 ( 0.1%)              |
| Road traffic accident                                               | mild                               | 1 ( <0.1%)             | 1 ( <0.1%)             | 2 ( <0.1%)             |
|                                                                     | moderate                           | 2 ( 0.1%)              | 1 ( <0.1%)             | 3 ( 0.1%)              |
| Seroma                                                              | mild                               | 1 ( <0.1%)             | 0                      | 1 ( <0.1%)             |
| Shunt occlusion                                                     | severe                             | 1 ( <0.1%)             | 0                      | 1 ( <0.1%)             |
| Skeletal injury                                                     | mild                               | 0                      | 1 ( <0.1%)             | 1 ( <0.1%)             |

**Table 14.3.1 / 16: Number of subjects with adverse events by maximum intensity, primary system organ class and preferred term (FAS)**

| Primary system organ class<br>Preferred term<br>MedDRA version 14.0 | Maximum AE<br>maximum<br>intensity | LCS12<br>N=1432 (100%) | LCS16<br>N=1452 (100%) | Total<br>N=2884 (100%) |
|---------------------------------------------------------------------|------------------------------------|------------------------|------------------------|------------------------|
| Skin injury                                                         | moderate                           | 0                      | 1 ( <0.1%)             | 1 ( <0.1%)             |
| Spinal column injury                                                | moderate                           | 0                      | 2 ( 0.1%)              | 2 ( <0.1%)             |
| Stress fracture                                                     | moderate                           | 0                      | 1 ( <0.1%)             | 1 ( <0.1%)             |
| Subdural haematoma                                                  | severe                             | 1 ( <0.1%)             | 0                      | 1 ( <0.1%)             |
| Tendon injury                                                       | moderate                           | 0                      | 1 ( <0.1%)             | 1 ( <0.1%)             |
| Tendon rupture                                                      | mild                               | 1 ( <0.1%)             | 0                      | 1 ( <0.1%)             |
|                                                                     | moderate                           | 2 ( 0.1%)              | 0                      | 2 ( <0.1%)             |
|                                                                     | severe                             | 0                      | 1 ( <0.1%)             | 1 ( <0.1%)             |
| Thermal burn                                                        | mild                               | 0                      | 1 ( <0.1%)             | 1 ( <0.1%)             |
|                                                                     | moderate                           | 0                      | 1 ( <0.1%)             | 1 ( <0.1%)             |
|                                                                     | severe                             | 0                      | 1 ( <0.1%)             | 1 ( <0.1%)             |
| Tibia fracture                                                      | moderate                           | 1 ( <0.1%)             | 1 ( <0.1%)             | 2 ( <0.1%)             |
| Traumatic fracture                                                  | mild                               | 1 ( <0.1%)             | 0                      | 1 ( <0.1%)             |
| Upper limb fracture                                                 | moderate                           | 0                      | 2 ( 0.1%)              | 2 ( <0.1%)             |
|                                                                     | severe                             | 1 ( <0.1%)             | 0                      | 1 ( <0.1%)             |
| Vulval laceration                                                   | mild                               | 0                      | 1 ( <0.1%)             | 1 ( <0.1%)             |
| Whiplash injury                                                     | mild                               | 0                      | 1 ( <0.1%)             | 1 ( <0.1%)             |
|                                                                     | moderate                           | 1 ( <0.1%)             | 4 ( 0.3%)              | 5 ( 0.2%)              |
| Wound                                                               | mild                               | 1 ( <0.1%)             | 0                      | 1 ( <0.1%)             |
| Wrist fracture                                                      | moderate                           | 0                      | 1 ( <0.1%)             | 1 ( <0.1%)             |
|                                                                     | severe                             | 0                      | 1 ( <0.1%)             | 1 ( <0.1%)             |
| Investigations                                                      | mild                               | 65 ( 4.5%)             | 68 ( 4.7%)             | 133 ( 4.6%)            |
|                                                                     | moderate                           | 39 ( 2.7%)             | 44 ( 3.0%)             | 83 ( 2.9%)             |
|                                                                     | severe                             | 4 ( 0.3%)              | 2 ( 0.1%)              | 6 ( 0.2%)              |



**Table 14.3.1 / 16: Number of subjects with adverse events by maximum intensity, primary system organ class and preferred term (FAS)**

| Primary system organ class<br>Preferred term<br>MedDRA version 14.0 | Maximum AE<br>maximum<br>intensity | LCS12<br>N=1432 (100%) | LCS16<br>N=1452 (100%) | Total<br>N=2884 (100%) |
|---------------------------------------------------------------------|------------------------------------|------------------------|------------------------|------------------------|
| Alanine aminotransferase increased                                  | mild                               | 1 ( <0.1%)             | 1 ( <0.1%)             | 2 ( <0.1%)             |
| Antibiotic resistant Staphylococcus test positive                   | mild                               | 1 ( <0.1%)             | 0                      | 1 ( <0.1%)             |
|                                                                     | moderate                           | 1 ( <0.1%)             | 0                      | 1 ( <0.1%)             |
| Biopsy muscle                                                       | severe                             | 1 ( <0.1%)             | 0                      | 1 ( <0.1%)             |
| Blood cholesterol increased                                         | mild                               | 1 ( <0.1%)             | 0                      | 1 ( <0.1%)             |
|                                                                     | severe                             | 1 ( <0.1%)             | 0                      | 1 ( <0.1%)             |
| Blood pressure diastolic increased                                  | mild                               | 0                      | 1 ( <0.1%)             | 1 ( <0.1%)             |
| Blood pressure increased                                            | mild                               | 2 ( 0.1%)              | 1 ( <0.1%)             | 3 ( 0.1%)              |
|                                                                     | moderate                           | 1 ( <0.1%)             | 0                      | 1 ( <0.1%)             |
| Blood pressure systolic increased                                   | mild                               | 0                      | 1 ( <0.1%)             | 1 ( <0.1%)             |
| Cardiac murmur                                                      | mild                               | 1 ( <0.1%)             | 0                      | 1 ( <0.1%)             |
|                                                                     | moderate                           | 1 ( <0.1%)             | 0                      | 1 ( <0.1%)             |
| Chlamydia test positive                                             | mild                               | 6 ( 0.4%)              | 1 ( <0.1%)             | 7 ( 0.2%)              |
|                                                                     | moderate                           | 1 ( <0.1%)             | 0                      | 1 ( <0.1%)             |
| Gamma-glutamyltransferase increased                                 | mild                               | 1 ( <0.1%)             | 0                      | 1 ( <0.1%)             |
| Gastric pH decreased                                                | mild                               | 0                      | 1 ( <0.1%)             | 1 ( <0.1%)             |
| Haemoglobin decreased                                               | mild                               | 2 ( 0.1%)              | 1 ( <0.1%)             | 3 ( 0.1%)              |
|                                                                     | severe                             | 0                      | 1 ( <0.1%)             | 1 ( <0.1%)             |
| Heart rate increased                                                | moderate                           | 0                      | 1 ( <0.1%)             | 1 ( <0.1%)             |
| Human papilloma virus test positive                                 | mild                               | 4 ( 0.3%)              | 4 ( 0.3%)              | 8 ( 0.3%)              |
|                                                                     | moderate                           | 1 ( <0.1%)             | 1 ( <0.1%)             | 2 ( <0.1%)             |
| Liver function test abnormal                                        | mild                               | 0                      | 1 ( <0.1%)             | 1 ( <0.1%)             |
|                                                                     | moderate                           | 0                      | 1 ( <0.1%)             | 1 ( <0.1%)             |

**Table 14.3.1 / 16: Number of subjects with adverse events by maximum intensity, primary system organ class and preferred term (FAS)**

| Primary system organ class<br>Preferred term<br>MedDRA version 14.0 | Maximum AE<br>maximum<br>intensity | LCS12<br>N=1432 (100%) | LCS16<br>N=1452 (100%) | Total<br>N=2884 (100%) |
|---------------------------------------------------------------------|------------------------------------|------------------------|------------------------|------------------------|
| Neisseria test positive                                             | moderate                           | 2 ( 0.1%)              | 0                      | 2 ( <0.1%)             |
| Simplex virus test positive                                         | mild                               | 1 ( <0.1%)             | 1 ( <0.1%)             | 2 ( <0.1%)             |
|                                                                     | moderate                           | 1 ( <0.1%)             | 0                      | 1 ( <0.1%)             |
| Smear cervix abnormal                                               | mild                               | 14 ( 1.0%)             | 23 ( 1.6%)             | 37 ( 1.3%)             |
|                                                                     | moderate                           | 4 ( 0.3%)              | 4 ( 0.3%)              | 8 ( 0.3%)              |
| Streptococcus test positive                                         | mild                               | 1 ( <0.1%)             | 0                      | 1 ( <0.1%)             |
| Ultrasound ovary abnormal                                           | mild                               | 1 ( <0.1%)             | 0                      | 1 ( <0.1%)             |
| Vitamin D decreased                                                 | moderate                           | 0                      | 1 ( <0.1%)             | 1 ( <0.1%)             |
| Weight decreased                                                    | mild                               | 5 ( 0.3%)              | 3 ( 0.2%)              | 8 ( 0.3%)              |
|                                                                     | moderate                           | 4 ( 0.3%)              | 4 ( 0.3%)              | 8 ( 0.3%)              |
| Weight increased                                                    | mild                               | 27 ( 1.9%)             | 34 ( 2.3%)             | 61 ( 2.1%)             |
|                                                                     | moderate                           | 27 ( 1.9%)             | 33 ( 2.3%)             | 60 ( 2.1%)             |
|                                                                     | severe                             | 2 ( 0.1%)              | 1 ( <0.1%)             | 3 ( 0.1%)              |
| White blood cell count increased                                    | mild                               | 1 ( <0.1%)             | 0                      | 1 ( <0.1%)             |
| Metabolism and nutrition disorders                                  | mild                               | 13 ( 0.9%)             | 8 ( 0.6%)              | 21 ( 0.7%)             |
|                                                                     | moderate                           | 5 ( 0.3%)              | 9 ( 0.6%)              | 14 ( 0.5%)             |
| Abnormal loss of weight                                             | mild                               | 0                      | 1 ( <0.1%)             | 1 ( <0.1%)             |
| Abnormal weight gain                                                | moderate                           | 0                      | 1 ( <0.1%)             | 1 ( <0.1%)             |
| Cell death                                                          | mild                               | 1 ( <0.1%)             | 0                      | 1 ( <0.1%)             |
| Cholesterosis                                                       | mild                               | 1 ( <0.1%)             | 0                      | 1 ( <0.1%)             |
| Decreased appetite                                                  | mild                               | 1 ( <0.1%)             | 1 ( <0.1%)             | 2 ( <0.1%)             |
|                                                                     | moderate                           | 1 ( <0.1%)             | 0                      | 1 ( <0.1%)             |

**Table 14.3.1 / 16: Number of subjects with adverse events by maximum intensity, primary system organ class and preferred term (FAS)**

| Primary system organ class<br>Preferred term<br>MedDRA version 14.0 | Maximum AE<br>maximum<br>intensity | LCS12<br>N=1432 (100%) | LCS16<br>N=1452 (100%) | Total<br>N=2884 (100%) |
|---------------------------------------------------------------------|------------------------------------|------------------------|------------------------|------------------------|
| Dehydration                                                         | mild                               | 0                      | 1 (<0.1%)              | 1 (<0.1%)              |
|                                                                     | moderate                           | 0                      | 1 (<0.1%)              | 1 (<0.1%)              |
| Diabetic ketoacidosis                                               | moderate                           | 0                      | 1 (<0.1%)              | 1 (<0.1%)              |
| Dyslipidaemia                                                       | mild                               | 0                      | 1 (<0.1%)              | 1 (<0.1%)              |
| Fluid retention                                                     | mild                               | 2 ( 0.1%)              | 0                      | 2 (<0.1%)              |
|                                                                     | moderate                           | 1 (<0.1%)              | 2 ( 0.1%)              | 3 ( 0.1%)              |
| Glucose tolerance impaired                                          | mild                               | 1 (<0.1%)              | 0                      | 1 (<0.1%)              |
| Hypokalaemia                                                        | moderate                           | 2 ( 0.1%)              | 0                      | 2 (<0.1%)              |
| Hyponatraemia                                                       | moderate                           | 1 (<0.1%)              | 0                      | 1 (<0.1%)              |
| Increased appetite                                                  | mild                               | 1 (<0.1%)              | 1 (<0.1%)              | 2 (<0.1%)              |
|                                                                     | moderate                           | 0                      | 1 (<0.1%)              | 1 (<0.1%)              |
| Insulin resistance                                                  | mild                               | 2 ( 0.1%)              | 1 (<0.1%)              | 3 ( 0.1%)              |
| Lactose intolerance                                                 | mild                               | 2 ( 0.1%)              | 0                      | 2 (<0.1%)              |
| Obesity                                                             | mild                               | 0                      | 1 (<0.1%)              | 1 (<0.1%)              |
| Overweight                                                          | moderate                           | 0                      | 1 (<0.1%)              | 1 (<0.1%)              |
| Type 2 diabetes mellitus                                            | mild                               | 1 (<0.1%)              | 0                      | 1 (<0.1%)              |
| Vitamin B12 deficiency                                              | mild                               | 1 (<0.1%)              | 0                      | 1 (<0.1%)              |
|                                                                     | moderate                           | 0                      | 1 (<0.1%)              | 1 (<0.1%)              |
| Vitamin D deficiency                                                | mild                               | 0                      | 2 ( 0.1%)              | 2 (<0.1%)              |
|                                                                     | moderate                           | 1 (<0.1%)              | 0                      | 1 (<0.1%)              |
| Weight fluctuation                                                  | moderate                           | 0                      | 1 (<0.1%)              | 1 (<0.1%)              |

**Table 14.3.1 / 16: Number of subjects with adverse events by maximum intensity, primary system organ class and preferred term (FAS)**

| Primary system organ class<br>Preferred term<br>MedDRA version 14.0 | Maximum AE<br>maximum<br>intensity | LCS12<br>N=1432 (100%) | LCS16<br>N=1452 (100%) | Total<br>N=2884 (100%) |
|---------------------------------------------------------------------|------------------------------------|------------------------|------------------------|------------------------|
| Musculoskeletal and connective tissue disorders                     | mild                               | 52 ( 3.6%)             | 65 ( 4.5%)             | 117 ( 4.1%)            |
|                                                                     | moderate                           | 76 ( 5.3%)             | 108 ( 7.4%)            | 184 ( 6.4%)            |
|                                                                     | severe                             | 16 ( 1.1%)             | 14 ( 1.0%)             | 30 ( 1.0%)             |
| Ankylosing spondylitis                                              | moderate                           | 1 ( <0.1%)             | 0                      | 1 ( <0.1%)             |
| Arthralgia                                                          | mild                               | 10 ( 0.7%)             | 12 ( 0.8%)             | 22 ( 0.8%)             |
|                                                                     | moderate                           | 10 ( 0.7%)             | 18 ( 1.2%)             | 28 ( 1.0%)             |
|                                                                     | severe                             | 1 ( <0.1%)             | 1 ( <0.1%)             | 2 ( <0.1%)             |
| Arthritis                                                           | mild                               | 0                      | 2 ( 0.1%)              | 2 ( <0.1%)             |
|                                                                     | moderate                           | 0                      | 2 ( 0.1%)              | 2 ( <0.1%)             |
|                                                                     | severe                             | 1 ( <0.1%)             | 1 ( <0.1%)             | 2 ( <0.1%)             |
| Axillary mass                                                       | moderate                           | 0                      | 1 ( <0.1%)             | 1 ( <0.1%)             |
| Back pain                                                           | mild                               | 19 ( 1.3%)             | 21 ( 1.4%)             | 40 ( 1.4%)             |
|                                                                     | moderate                           | 35 ( 2.4%)             | 38 ( 2.6%)             | 73 ( 2.5%)             |
|                                                                     | severe                             | 5 ( 0.3%)              | 6 ( 0.4%)              | 11 ( 0.4%)             |
| Bone pain                                                           | mild                               | 1 ( <0.1%)             | 1 ( <0.1%)             | 2 ( <0.1%)             |
|                                                                     | moderate                           | 0                      | 1 ( <0.1%)             | 1 ( <0.1%)             |
|                                                                     | severe                             | 0                      | 1 ( <0.1%)             | 1 ( <0.1%)             |
| Bursitis                                                            | mild                               | 1 ( <0.1%)             | 1 ( <0.1%)             | 2 ( <0.1%)             |
|                                                                     | moderate                           | 1 ( <0.1%)             | 0                      | 1 ( <0.1%)             |
| Compartment syndrome                                                | moderate                           | 0                      | 1 ( <0.1%)             | 1 ( <0.1%)             |
| Costochondritis                                                     | mild                               | 1 ( <0.1%)             | 0                      | 1 ( <0.1%)             |
|                                                                     | moderate                           | 1 ( <0.1%)             | 1 ( <0.1%)             | 2 ( <0.1%)             |
|                                                                     | severe                             | 1 ( <0.1%)             | 0                      | 1 ( <0.1%)             |
| Exostosis                                                           | mild                               | 1 ( <0.1%)             | 1 ( <0.1%)             | 2 ( <0.1%)             |
|                                                                     | moderate                           | 0                      | 2 ( 0.1%)              | 2 ( <0.1%)             |
| Fibromyalgia                                                        | mild                               | 1 ( <0.1%)             | 2 ( 0.1%)              | 3 ( 0.1%)              |

**Table 14.3.1 / 16: Number of subjects with adverse events by maximum intensity, primary system organ class and preferred term (FAS)**

| Primary system organ class<br>Preferred term<br>MedDRA version 14.0 | Maximum AE<br>maximum<br>intensity | LCS12<br>N=1432 (100%) | LCS16<br>N=1452 (100%) | Total<br>N=2884 (100%) |
|---------------------------------------------------------------------|------------------------------------|------------------------|------------------------|------------------------|
| Flank pain                                                          | moderate                           | 2 ( 0.1%)              | 3 ( 0.2%)              | 5 ( 0.2%)              |
| Groin pain                                                          | mild                               | 2 ( 0.1%)              | 3 ( 0.2%)              | 5 ( 0.2%)              |
|                                                                     | severe                             | 0                      | 1 (<0.1%)              | 1 (<0.1%)              |
| Hand deformity                                                      | mild                               | 0                      | 1 (<0.1%)              | 1 (<0.1%)              |
|                                                                     | moderate                           | 0                      | 1 (<0.1%)              | 1 (<0.1%)              |
| Intervertebral disc disorder                                        | moderate                           | 0                      | 1 (<0.1%)              | 1 (<0.1%)              |
|                                                                     | severe                             | 1 (<0.1%)              | 0                      | 1 (<0.1%)              |
| Intervertebral disc protrusion                                      | moderate                           | 1 (<0.1%)              | 2 ( 0.1%)              | 3 ( 0.1%)              |
|                                                                     | severe                             | 0                      | 1 (<0.1%)              | 1 (<0.1%)              |
| Joint effusion                                                      | severe                             | 1 (<0.1%)              | 0                      | 1 (<0.1%)              |
| Joint instability                                                   | moderate                           | 1 (<0.1%)              | 1 (<0.1%)              | 2 (<0.1%)              |
| Joint stiffness                                                     | moderate                           | 0                      | 1 (<0.1%)              | 1 (<0.1%)              |
| Joint swelling                                                      | moderate                           | 1 (<0.1%)              | 1 (<0.1%)              | 2 (<0.1%)              |
| Loose body in joint                                                 | moderate                           | 0                      | 1 (<0.1%)              | 1 (<0.1%)              |
| Medial tibial stress syndrome                                       | mild                               | 1 (<0.1%)              | 1 (<0.1%)              | 2 (<0.1%)              |
|                                                                     | moderate                           | 1 (<0.1%)              | 1 (<0.1%)              | 2 (<0.1%)              |
| Muscle contracture                                                  | mild                               | 0                      | 1 (<0.1%)              | 1 (<0.1%)              |
|                                                                     | moderate                           | 0                      | 1 (<0.1%)              | 1 (<0.1%)              |
|                                                                     | severe                             | 1 (<0.1%)              | 0                      | 1 (<0.1%)              |
| Muscle spasms                                                       | mild                               | 3 ( 0.2%)              | 3 ( 0.2%)              | 6 ( 0.2%)              |
|                                                                     | moderate                           | 2 ( 0.1%)              | 5 ( 0.3%)              | 7 ( 0.2%)              |
| Muscle tightness                                                    | mild                               | 3 ( 0.2%)              | 2 ( 0.1%)              | 5 ( 0.2%)              |
|                                                                     | moderate                           | 5 ( 0.3%)              | 8 ( 0.6%)              | 13 ( 0.5%)             |
| Musculoskeletal chest pain                                          | moderate                           | 2 ( 0.1%)              | 2 ( 0.1%)              | 4 ( 0.1%)              |

**Table 14.3.1 / 16: Number of subjects with adverse events by maximum intensity, primary system organ class and preferred term (FAS)**

| Primary system organ class<br>Preferred term<br>MedDRA version 14.0 | Maximum AE<br>maximum<br>intensity | LCS12<br>N=1432 (100%) | LCS16<br>N=1452 (100%) | Total<br>N=2884 (100%) |
|---------------------------------------------------------------------|------------------------------------|------------------------|------------------------|------------------------|
| Musculoskeletal discomfort                                          | mild                               | 0                      | 1 (<0.1%)              | 1 (<0.1%)              |
| Musculoskeletal pain                                                | mild                               | 5 ( 0.3%)              | 2 ( 0.1%)              | 7 ( 0.2%)              |
|                                                                     | moderate                           | 3 ( 0.2%)              | 8 ( 0.6%)              | 11 ( 0.4%)             |
|                                                                     | severe                             | 1 (<0.1%)              | 1 (<0.1%)              | 2 (<0.1%)              |
| Musculoskeletal stiffness                                           | moderate                           | 0                      | 1 (<0.1%)              | 1 (<0.1%)              |
| Myalgia                                                             | mild                               | 4 ( 0.3%)              | 5 ( 0.3%)              | 9 ( 0.3%)              |
|                                                                     | moderate                           | 5 ( 0.3%)              | 6 ( 0.4%)              | 11 ( 0.4%)             |
|                                                                     | severe                             | 0                      | 1 (<0.1%)              | 1 (<0.1%)              |
| Myositis                                                            | moderate                           | 0                      | 1 (<0.1%)              | 1 (<0.1%)              |
| Neck pain                                                           | mild                               | 5 ( 0.3%)              | 3 ( 0.2%)              | 8 ( 0.3%)              |
|                                                                     | moderate                           | 7 ( 0.5%)              | 6 ( 0.4%)              | 13 ( 0.5%)             |
|                                                                     | severe                             | 0                      | 1 (<0.1%)              | 1 (<0.1%)              |
| Osteitis                                                            | mild                               | 1 (<0.1%)              | 0                      | 1 (<0.1%)              |
|                                                                     | severe                             | 1 (<0.1%)              | 0                      | 1 (<0.1%)              |
| Osteoarthritis                                                      | moderate                           | 0                      | 2 ( 0.1%)              | 2 (<0.1%)              |
| Osteochondrosis                                                     | mild                               | 0                      | 1 (<0.1%)              | 1 (<0.1%)              |
|                                                                     | severe                             | 0                      | 1 (<0.1%)              | 1 (<0.1%)              |
| Osteopenia                                                          | mild                               | 0                      | 1 (<0.1%)              | 1 (<0.1%)              |
| Pain in extremity                                                   | mild                               | 2 ( 0.1%)              | 10 ( 0.7%)             | 12 ( 0.4%)             |
|                                                                     | moderate                           | 4 ( 0.3%)              | 5 ( 0.3%)              | 9 ( 0.3%)              |
| Pain in jaw                                                         | moderate                           | 0                      | 1 (<0.1%)              | 1 (<0.1%)              |
| Patellofemoral pain syndrome                                        | moderate                           | 1 (<0.1%)              | 0                      | 1 (<0.1%)              |
| Plantar fasciitis                                                   | moderate                           | 0                      | 1 (<0.1%)              | 1 (<0.1%)              |
| Psoriatic arthropathy                                               | severe                             | 1 (<0.1%)              | 0                      | 1 (<0.1%)              |

**Table 14.3.1 / 16: Number of subjects with adverse events by maximum intensity, primary system organ class and preferred term (FAS)**

| Primary system organ class<br>Preferred term<br>MedDRA version 14.0 | Maximum AE<br>maximum<br>intensity | LCS12<br>N=1432 (100%) | LCS16<br>N=1452 (100%) | Total<br>N=2884 (100%) |
|---------------------------------------------------------------------|------------------------------------|------------------------|------------------------|------------------------|
| Rotator cuff syndrome                                               | mild                               | 1 ( <0.1%)             | 2 ( 0.1%)              | 3 ( 0.1%)              |
|                                                                     | moderate                           | 0                      | 4 ( 0.3%)              | 4 ( 0.1%)              |
| Scleroderma                                                         | mild                               | 1 ( <0.1%)             | 0                      | 1 ( <0.1%)             |
| Sensation of heaviness                                              | moderate                           | 0                      | 1 ( <0.1%)             | 1 ( <0.1%)             |
| Spinal osteoarthritis                                               | mild                               | 1 ( <0.1%)             | 0                      | 1 ( <0.1%)             |
| Synovitis                                                           | severe                             | 1 ( <0.1%)             | 0                      | 1 ( <0.1%)             |
| Temporomandibular joint syndrome                                    | mild                               | 1 ( <0.1%)             | 1 ( <0.1%)             | 2 ( <0.1%)             |
| Tendon pain                                                         | mild                               | 0                      | 1 ( <0.1%)             | 1 ( <0.1%)             |
|                                                                     | moderate                           | 1 ( <0.1%)             | 0                      | 1 ( <0.1%)             |
| Tendonitis                                                          | mild                               | 3 ( 0.2%)              | 1 ( <0.1%)             | 4 ( 0.1%)              |
|                                                                     | moderate                           | 1 ( <0.1%)             | 4 ( 0.3%)              | 5 ( 0.2%)              |
|                                                                     | severe                             | 1 ( <0.1%)             | 0                      | 1 ( <0.1%)             |
| Tenosynovitis                                                       | moderate                           | 0                      | 1 ( <0.1%)             | 1 ( <0.1%)             |
| Torticollis                                                         | mild                               | 0                      | 2 ( 0.1%)              | 2 ( <0.1%)             |
|                                                                     | moderate                           | 1 ( <0.1%)             | 0                      | 1 ( <0.1%)             |
| Neoplasms benign, malignant and unspecified (incl cysts and polyps) | mild                               | 33 ( 2.3%)             | 29 ( 2.0%)             | 62 ( 2.1%)             |
|                                                                     | moderate                           | 8 ( 0.6%)              | 11 ( 0.8%)             | 19 ( 0.7%)             |
|                                                                     | severe                             | 4 ( 0.3%)              | 3 ( 0.2%)              | 7 ( 0.2%)              |
| Acoustic neuroma                                                    | moderate                           | 0                      | 1 ( <0.1%)             | 1 ( <0.1%)             |
| Acrochordon                                                         | mild                               | 1 ( <0.1%)             | 3 ( 0.2%)              | 4 ( 0.1%)              |
| Acute leukaemia                                                     | severe                             | 1 ( <0.1%)             | 0                      | 1 ( <0.1%)             |
| Adenoma benign                                                      | mild                               | 0                      | 1 ( <0.1%)             | 1 ( <0.1%)             |

**Table 14.3.1 / 16: Number of subjects with adverse events by maximum intensity, primary system organ class and preferred term (FAS)**

| Primary system organ class<br>Preferred term<br>MedDRA version 14.0 | Maximum AE<br>maximum<br>intensity | LCS12<br>N=1432 (100%) | LCS16<br>N=1452 (100%) | Total<br>N=2884 (100%) |
|---------------------------------------------------------------------|------------------------------------|------------------------|------------------------|------------------------|
| Astrocytoma, low grade                                              | severe                             | 1 ( <0.1%)             | 0                      | 1 ( <0.1%)             |
| Benign breast neoplasm                                              | mild                               | 1 ( <0.1%)             | 1 ( <0.1%)             | 2 ( <0.1%)             |
|                                                                     | moderate                           | 1 ( <0.1%)             | 0                      | 1 ( <0.1%)             |
| Cervicitis human papilloma virus                                    | mild                               | 1 ( <0.1%)             | 4 ( 0.3%)              | 5 ( 0.2%)              |
| Cervix carcinoma stage 0                                            | severe                             | 0                      | 1 ( <0.1%)             | 1 ( <0.1%)             |
| Cervix neoplasm                                                     | moderate                           | 1 ( <0.1%)             | 0                      | 1 ( <0.1%)             |
| Enchondroma                                                         | moderate                           | 0                      | 1 ( <0.1%)             | 1 ( <0.1%)             |
| Fibroadenoma of breast                                              | mild                               | 6 ( 0.4%)              | 1 ( <0.1%)             | 7 ( 0.2%)              |
|                                                                     | moderate                           | 1 ( <0.1%)             | 1 ( <0.1%)             | 2 ( <0.1%)             |
| Glomus tumour                                                       | moderate                           | 1 ( <0.1%)             | 0                      | 1 ( <0.1%)             |
| Haemangioma                                                         | mild                               | 1 ( <0.1%)             | 0                      | 1 ( <0.1%)             |
| Haemangioma of liver                                                | moderate                           | 0                      | 1 ( <0.1%)             | 1 ( <0.1%)             |
| Leiomyoma                                                           | mild                               | 0                      | 1 ( <0.1%)             | 1 ( <0.1%)             |
| Lipoma of breast                                                    | mild                               | 2 ( 0.1%)              | 0                      | 2 ( <0.1%)             |
| Malignant melanoma                                                  | severe                             | 0                      | 1 ( <0.1%)             | 1 ( <0.1%)             |
| Melanocytic naevus                                                  | mild                               | 6 ( 0.4%)              | 3 ( 0.2%)              | 9 ( 0.3%)              |
|                                                                     | moderate                           | 0                      | 1 ( <0.1%)             | 1 ( <0.1%)             |
| Neurilemmoma                                                        | moderate                           | 0                      | 1 ( <0.1%)             | 1 ( <0.1%)             |
| Ovarian germ cell teratoma benign                                   | mild                               | 3 ( 0.2%)              | 1 ( <0.1%)             | 4 ( 0.1%)              |
|                                                                     | moderate                           | 2 ( 0.1%)              | 2 ( 0.1%)              | 4 ( 0.1%)              |
| Ovarian neoplasm                                                    | mild                               | 0                      | 2 ( 0.1%)              | 2 ( <0.1%)             |



**Table 14.3.1 / 16: Number of subjects with adverse events by maximum intensity, primary system organ class and preferred term (FAS)**

| Primary system organ class<br>Preferred term<br>MedDRA version 14.0 | Maximum AE<br>maximum<br>intensity | LCS12<br>N=1432 (100%) | LCS16<br>N=1452 (100%) | Total<br>N=2884 (100%) |
|---------------------------------------------------------------------|------------------------------------|------------------------|------------------------|------------------------|
| Pancreatic carcinoma                                                | severe                             | 0                      | 1 ( <0.1%)             | 1 ( <0.1%)             |
| Skin papilloma                                                      | mild                               | 0                      | 2 ( 0.1%)              | 2 ( <0.1%)             |
|                                                                     | moderate                           | 1 ( <0.1%)             | 0                      | 1 ( <0.1%)             |
| Teratoma benign                                                     | mild                               | 0                      | 1 ( <0.1%)             | 1 ( <0.1%)             |
| Thyroid cancer                                                      | severe                             | 2 ( 0.1%)              | 0                      | 2 ( <0.1%)             |
| Thyroid neoplasm                                                    | mild                               | 0                      | 2 ( 0.1%)              | 2 ( <0.1%)             |
| Uterine leiomyoma                                                   | mild                               | 7 ( 0.5%)              | 4 ( 0.3%)              | 11 ( 0.4%)             |
|                                                                     | moderate                           | 1 ( <0.1%)             | 2 ( 0.1%)              | 3 ( 0.1%)              |
| Vulvovaginal human papilloma virus infection                        | mild                               | 5 ( 0.3%)              | 5 ( 0.3%)              | 10 ( 0.3%)             |
|                                                                     | moderate                           | 0                      | 1 ( <0.1%)             | 1 ( <0.1%)             |
| Nervous system disorders                                            | mild                               | 83 ( 5.8%)             | 80 ( 5.5%)             | 163 ( 5.7%)            |
|                                                                     | moderate                           | 85 ( 5.9%)             | 108 ( 7.4%)            | 193 ( 6.7%)            |
|                                                                     | severe                             | 32 ( 2.2%)             | 32 ( 2.2%)             | 64 ( 2.2%)             |
| Amnesia                                                             | mild                               | 0                      | 1 ( <0.1%)             | 1 ( <0.1%)             |
|                                                                     | severe                             | 1 ( <0.1%)             | 0                      | 1 ( <0.1%)             |
| Aphonia                                                             | moderate                           | 0                      | 1 ( <0.1%)             | 1 ( <0.1%)             |
| Burning sensation                                                   | moderate                           | 1 ( <0.1%)             | 0                      | 1 ( <0.1%)             |
| Carpal tunnel syndrome                                              | moderate                           | 1 ( <0.1%)             | 6 ( 0.4%)              | 7 ( 0.2%)              |
| Cervicobrachial syndrome                                            | mild                               | 0                      | 1 ( <0.1%)             | 1 ( <0.1%)             |
| Cervicogenic headache                                               | moderate                           | 1 ( <0.1%)             | 0                      | 1 ( <0.1%)             |
| Cluster headache                                                    | moderate                           | 0                      | 1 ( <0.1%)             | 1 ( <0.1%)             |

**Table 14.3.1 / 16: Number of subjects with adverse events by maximum intensity, primary system organ class and preferred term (FAS)**

| Primary system organ class<br>Preferred term<br>MedDRA version 14.0 | Maximum AE<br>maximum<br>intensity | LCS12<br>N=1432 (100%) | LCS16<br>N=1452 (100%) | Total<br>N=2884 (100%) |
|---------------------------------------------------------------------|------------------------------------|------------------------|------------------------|------------------------|
| Convulsion                                                          | mild                               | 1 ( <0.1%)             | 1 ( <0.1%)             | 2 ( <0.1%)             |
|                                                                     | moderate                           | 0                      | 1 ( <0.1%)             | 1 ( <0.1%)             |
| Disturbance in attention                                            | mild                               | 0                      | 1 ( <0.1%)             | 1 ( <0.1%)             |
|                                                                     | moderate                           | 0                      | 1 ( <0.1%)             | 1 ( <0.1%)             |
| Dizziness                                                           | mild                               | 5 ( 0.3%)              | 9 ( 0.6%)              | 14 ( 0.5%)             |
|                                                                     | moderate                           | 3 ( 0.2%)              | 11 ( 0.8%)             | 14 ( 0.5%)             |
|                                                                     | severe                             | 1 ( <0.1%)             | 1 ( <0.1%)             | 2 ( <0.1%)             |
| Dizziness postural                                                  | mild                               | 1 ( <0.1%)             | 0                      | 1 ( <0.1%)             |
| Facial spasm                                                        | severe                             | 1 ( <0.1%)             | 0                      | 1 ( <0.1%)             |
| Headache                                                            | mild                               | 65 ( 4.5%)             | 56 ( 3.9%)             | 121 ( 4.2%)            |
|                                                                     | moderate                           | 50 ( 3.5%)             | 59 ( 4.1%)             | 109 ( 3.8%)            |
|                                                                     | severe                             | 18 ( 1.3%)             | 22 ( 1.5%)             | 40 ( 1.4%)             |
| Hypoaesthesia                                                       | mild                               | 1 ( <0.1%)             | 2 ( 0.1%)              | 3 ( 0.1%)              |
|                                                                     | moderate                           | 1 ( <0.1%)             | 2 ( 0.1%)              | 3 ( 0.1%)              |
| Loss of consciousness                                               | mild                               | 0                      | 1 ( <0.1%)             | 1 ( <0.1%)             |
| Migraine                                                            | mild                               | 10 ( 0.7%)             | 10 ( 0.7%)             | 20 ( 0.7%)             |
|                                                                     | moderate                           | 18 ( 1.3%)             | 19 ( 1.3%)             | 37 ( 1.3%)             |
|                                                                     | severe                             | 6 ( 0.4%)              | 9 ( 0.6%)              | 15 ( 0.5%)             |
| Migraine with aura                                                  | mild                               | 1 ( <0.1%)             | 0                      | 1 ( <0.1%)             |
|                                                                     | moderate                           | 3 ( 0.2%)              | 2 ( 0.1%)              | 5 ( 0.2%)              |
| Migraine without aura                                               | mild                               | 1 ( <0.1%)             | 0                      | 1 ( <0.1%)             |
| Morton's neuralgia                                                  | mild                               | 1 ( <0.1%)             | 0                      | 1 ( <0.1%)             |
| Multiple sclerosis                                                  | mild                               | 1 ( <0.1%)             | 0                      | 1 ( <0.1%)             |
| Muscle contractions involuntary                                     | mild                               | 0                      | 1 ( <0.1%)             | 1 ( <0.1%)             |

**Table 14.3.1 / 16: Number of subjects with adverse events by maximum intensity, primary system organ class and preferred term (FAS)**

| Primary system organ class<br>Preferred term<br>MedDRA version 14.0 | Maximum AE<br>maximum<br>intensity | LCS12<br>N=1432 (100%) | LCS16<br>N=1452 (100%) | Total<br>N=2884 (100%) |
|---------------------------------------------------------------------|------------------------------------|------------------------|------------------------|------------------------|
| Nerve compression                                                   | moderate                           | 2 ( 0.1%)              | 0                      | 2 ( <0.1%)             |
| Nervous system disorder                                             | moderate                           | 0                      | 1 ( <0.1%)             | 1 ( <0.1%)             |
| Paraesthesia                                                        | mild                               | 0                      | 2 ( 0.1%)              | 2 ( <0.1%)             |
|                                                                     | moderate                           | 0                      | 2 ( 0.1%)              | 2 ( <0.1%)             |
|                                                                     | severe                             | 0                      | 1 ( <0.1%)             | 1 ( <0.1%)             |
| Presyncope                                                          | mild                               | 0                      | 5 ( 0.3%)              | 5 ( 0.2%)              |
|                                                                     | moderate                           | 3 ( 0.2%)              | 4 ( 0.3%)              | 7 ( 0.2%)              |
|                                                                     | severe                             | 1 ( <0.1%)             | 0                      | 1 ( <0.1%)             |
| Restless legs syndrome                                              | mild                               | 1 ( <0.1%)             | 0                      | 1 ( <0.1%)             |
| Sciatica                                                            | mild                               | 2 ( 0.1%)              | 1 ( <0.1%)             | 3 ( 0.1%)              |
|                                                                     | moderate                           | 1 ( <0.1%)             | 2 ( 0.1%)              | 3 ( 0.1%)              |
|                                                                     | severe                             | 1 ( <0.1%)             | 0                      | 1 ( <0.1%)             |
| Sinus headache                                                      | mild                               | 1 ( <0.1%)             | 1 ( <0.1%)             | 2 ( <0.1%)             |
|                                                                     | moderate                           | 0                      | 1 ( <0.1%)             | 1 ( <0.1%)             |
| Somnolence                                                          | mild                               | 1 ( <0.1%)             | 1 ( <0.1%)             | 2 ( <0.1%)             |
|                                                                     | moderate                           | 1 ( <0.1%)             | 0                      | 1 ( <0.1%)             |
| Spinal cord herniation                                              | moderate                           | 0                      | 1 ( <0.1%)             | 1 ( <0.1%)             |
| Status migrainosus                                                  | severe                             | 1 ( <0.1%)             | 0                      | 1 ( <0.1%)             |
| Syncope                                                             | mild                               | 3 ( 0.2%)              | 3 ( 0.2%)              | 6 ( 0.2%)              |
|                                                                     | moderate                           | 2 ( 0.1%)              | 2 ( 0.1%)              | 4 ( 0.1%)              |
|                                                                     | severe                             | 1 ( <0.1%)             | 0                      | 1 ( <0.1%)             |
| Tension headache                                                    | mild                               | 4 ( 0.3%)              | 3 ( 0.2%)              | 7 ( 0.2%)              |
|                                                                     | moderate                           | 7 ( 0.5%)              | 6 ( 0.4%)              | 13 ( 0.5%)             |
|                                                                     | severe                             | 1 ( <0.1%)             | 0                      | 1 ( <0.1%)             |
| Thoracic outlet syndrome                                            | moderate                           | 1 ( <0.1%)             | 0                      | 1 ( <0.1%)             |

**Table 14.3.1 / 16: Number of subjects with adverse events by maximum intensity, primary system organ class and preferred term (FAS)**

| Primary system organ class<br>Preferred term<br>MedDRA version 14.0 | Maximum AE<br>maximum<br>intensity | LCS12<br>N=1432 (100%) | LCS16<br>N=1452 (100%) | Total<br>N=2884 (100%) |
|---------------------------------------------------------------------|------------------------------------|------------------------|------------------------|------------------------|
| VIIIth nerve paralysis                                              | mild                               | 1 ( <0.1%)             | 0                      | 1 ( <0.1%)             |
|                                                                     | severe                             | 1 ( <0.1%)             | 0                      | 1 ( <0.1%)             |
| Pregnancy, puerperium and perinatal conditions                      | mild                               | 3 ( 0.2%)              | 1 ( <0.1%)             | 4 ( 0.1%)              |
|                                                                     | moderate                           | 1 ( <0.1%)             | 4 ( 0.3%)              | 5 ( 0.2%)              |
|                                                                     | severe                             | 2 ( 0.1%)              | 5 ( 0.3%)              | 7 ( 0.2%)              |
| Abortion spontaneous                                                | mild                               | 1 ( <0.1%)             | 0                      | 1 ( <0.1%)             |
|                                                                     | moderate                           | 1 ( <0.1%)             | 0                      | 1 ( <0.1%)             |
|                                                                     | severe                             | 1 ( <0.1%)             | 0                      | 1 ( <0.1%)             |
| Abortion spontaneous incomplete                                     | moderate                           | 0                      | 1 ( <0.1%)             | 1 ( <0.1%)             |
| Blighted ovum                                                       | severe                             | 0                      | 1 ( <0.1%)             | 1 ( <0.1%)             |
| Ectopic pregnancy                                                   | mild                               | 2 ( 0.1%)              | 1 ( <0.1%)             | 3 ( 0.1%)              |
|                                                                     | moderate                           | 0                      | 2 ( 0.1%)              | 2 ( <0.1%)             |
|                                                                     | severe                             | 1 ( <0.1%)             | 3 ( 0.2%)              | 4 ( 0.1%)              |
| Premature separation of placenta                                    | moderate                           | 1 ( <0.1%)             | 0                      | 1 ( <0.1%)             |
| Ruptured ectopic pregnancy                                          | severe                             | 0                      | 1 ( <0.1%)             | 1 ( <0.1%)             |
| Uterine contractions abnormal                                       | moderate                           | 0                      | 1 ( <0.1%)             | 1 ( <0.1%)             |
| Psychiatric disorders                                               | mild                               | 76 ( 5.3%)             | 85 ( 5.9%)             | 161 ( 5.6%)            |
|                                                                     | moderate                           | 84 ( 5.9%)             | 72 ( 5.0%)             | 156 ( 5.4%)            |
|                                                                     | severe                             | 13 ( 0.9%)             | 15 ( 1.0%)             | 28 ( 1.0%)             |
| Acute stress disorder                                               | moderate                           | 0                      | 1 ( <0.1%)             | 1 ( <0.1%)             |
| Adjustment disorder                                                 | mild                               | 1 ( <0.1%)             | 0                      | 1 ( <0.1%)             |
| Affect lability                                                     | mild                               | 2 ( 0.1%)              | 1 ( <0.1%)             | 3 ( 0.1%)              |
|                                                                     | moderate                           | 2 ( 0.1%)              | 0                      | 2 ( <0.1%)             |
| Affective disorder                                                  | severe                             | 0                      | 1 ( <0.1%)             | 1 ( <0.1%)             |

**Table 14.3.1 / 16: Number of subjects with adverse events by maximum intensity, primary system organ class and preferred term (FAS)**

| Primary system organ class<br>Preferred term<br>MedDRA version 14.0 | Maximum AE<br>maximum<br>intensity | LCS12<br>N=1432 (100%) | LCS16<br>N=1452 (100%) | Total<br>N=2884 (100%) |
|---------------------------------------------------------------------|------------------------------------|------------------------|------------------------|------------------------|
| Aggression                                                          | moderate                           | 1 ( <0.1%)             | 0                      | 1 ( <0.1%)             |
| Alcohol abuse                                                       | mild                               | 0                      | 1 ( <0.1%)             | 1 ( <0.1%)             |
| Alcoholism                                                          | severe                             | 0                      | 1 ( <0.1%)             | 1 ( <0.1%)             |
| Anxiety                                                             | mild                               | 16 ( 1.1%)             | 13 ( 0.9%)             | 29 ( 1.0%)             |
|                                                                     | moderate                           | 17 ( 1.2%)             | 21 ( 1.4%)             | 38 ( 1.3%)             |
|                                                                     | severe                             | 4 ( 0.3%)              | 3 ( 0.2%)              | 7 ( 0.2%)              |
| Anxiety disorder                                                    | mild                               | 1 ( <0.1%)             | 3 ( 0.2%)              | 4 ( 0.1%)              |
|                                                                     | moderate                           | 0                      | 1 ( <0.1%)             | 1 ( <0.1%)             |
| Attention deficit/hyperactivity disorder                            | mild                               | 0                      | 3 ( 0.2%)              | 3 ( 0.1%)              |
|                                                                     | moderate                           | 4 ( 0.3%)              | 1 ( <0.1%)             | 5 ( 0.2%)              |
| Bipolar I disorder                                                  | moderate                           | 1 ( <0.1%)             | 0                      | 1 ( <0.1%)             |
| Bipolar disorder                                                    | mild                               | 0                      | 4 ( 0.3%)              | 4 ( 0.1%)              |
|                                                                     | moderate                           | 1 ( <0.1%)             | 1 ( <0.1%)             | 2 ( <0.1%)             |
|                                                                     | severe                             | 0                      | 1 ( <0.1%)             | 1 ( <0.1%)             |
| Bulimia nervosa                                                     | mild                               | 0                      | 1 ( <0.1%)             | 1 ( <0.1%)             |
| Burnout syndrome                                                    | mild                               | 0                      | 1 ( <0.1%)             | 1 ( <0.1%)             |
|                                                                     | moderate                           | 1 ( <0.1%)             | 1 ( <0.1%)             | 2 ( <0.1%)             |
| Completed suicide                                                   | severe                             | 0                      | 1 ( <0.1%)             | 1 ( <0.1%)             |
| Daydreaming                                                         | moderate                           | 1 ( <0.1%)             | 0                      | 1 ( <0.1%)             |
| Depressed mood                                                      | mild                               | 2 ( 0.1%)              | 1 ( <0.1%)             | 3 ( 0.1%)              |
|                                                                     | moderate                           | 3 ( 0.2%)              | 2 ( 0.1%)              | 5 ( 0.2%)              |
| Depression                                                          | mild                               | 25 ( 1.7%)             | 27 ( 1.9%)             | 52 ( 1.8%)             |
|                                                                     | moderate                           | 22 ( 1.5%)             | 18 ( 1.2%)             | 40 ( 1.4%)             |
|                                                                     | severe                             | 4 ( 0.3%)              | 4 ( 0.3%)              | 8 ( 0.3%)              |

**Table 14.3.1 / 16: Number of subjects with adverse events by maximum intensity, primary system organ class and preferred term (FAS)**

| Primary system organ class<br>Preferred term<br>MedDRA version 14.0 | Maximum AE<br>maximum<br>intensity | LCS12<br>N=1432 (100%) | LCS16<br>N=1452 (100%) | Total<br>N=2884 (100%) |
|---------------------------------------------------------------------|------------------------------------|------------------------|------------------------|------------------------|
| Depression suicidal                                                 | severe                             | 1 ( <0.1%)             | 0                      | 1 ( <0.1%)             |
| Depressive symptom                                                  | mild                               | 1 ( <0.1%)             | 0                      | 1 ( <0.1%)             |
| Disorientation                                                      | moderate                           | 0                      | 1 ( <0.1%)             | 1 ( <0.1%)             |
| Drug dependence                                                     | moderate                           | 1 ( <0.1%)             | 0                      | 1 ( <0.1%)             |
|                                                                     | severe                             | 0                      | 1 ( <0.1%)             | 1 ( <0.1%)             |
| Fear                                                                | mild                               | 1 ( <0.1%)             | 0                      | 1 ( <0.1%)             |
|                                                                     | moderate                           | 0                      | 1 ( <0.1%)             | 1 ( <0.1%)             |
| Generalised anxiety disorder                                        | mild                               | 2 ( 0.1%)              | 0                      | 2 ( <0.1%)             |
|                                                                     | moderate                           | 1 ( <0.1%)             | 0                      | 1 ( <0.1%)             |
| Hallucination, auditory                                             | moderate                           | 1 ( <0.1%)             | 0                      | 1 ( <0.1%)             |
| Insomnia                                                            | mild                               | 14 ( 1.0%)             | 14 ( 1.0%)             | 28 ( 1.0%)             |
|                                                                     | moderate                           | 6 ( 0.4%)              | 13 ( 0.9%)             | 19 ( 0.7%)             |
|                                                                     | severe                             | 2 ( 0.1%)              | 2 ( 0.1%)              | 4 ( 0.1%)              |
| Libido decreased                                                    | mild                               | 16 ( 1.1%)             | 16 ( 1.1%)             | 32 ( 1.1%)             |
|                                                                     | moderate                           | 9 ( 0.6%)              | 9 ( 0.6%)              | 18 ( 0.6%)             |
|                                                                     | severe                             | 2 ( 0.1%)              | 0                      | 2 ( <0.1%)             |
| Libido increased                                                    | mild                               | 0                      | 2 ( 0.1%)              | 2 ( <0.1%)             |
|                                                                     | moderate                           | 2 ( 0.1%)              | 0                      | 2 ( <0.1%)             |
| Loss of libido                                                      | mild                               | 0                      | 1 ( <0.1%)             | 1 ( <0.1%)             |
|                                                                     | moderate                           | 4 ( 0.3%)              | 0                      | 4 ( 0.1%)              |
|                                                                     | severe                             | 0                      | 1 ( <0.1%)             | 1 ( <0.1%)             |
| Mental status changes                                               | mild                               | 0                      | 1 ( <0.1%)             | 1 ( <0.1%)             |
| Mood altered                                                        | mild                               | 5 ( 0.3%)              | 7 ( 0.5%)              | 12 ( 0.4%)             |
|                                                                     | moderate                           | 9 ( 0.6%)              | 3 ( 0.2%)              | 12 ( 0.4%)             |
|                                                                     | severe                             | 1 ( <0.1%)             | 0                      | 1 ( <0.1%)             |

**Table 14.3.1 / 16: Number of subjects with adverse events by maximum intensity, primary system organ class and preferred term (FAS)**

| Primary system organ class<br>Preferred term<br>MedDRA version 14.0 | Maximum AE<br>maximum<br>intensity | LCS12<br>N=1432 (100%) | LCS16<br>N=1452 (100%) | Total<br>N=2884 (100%) |
|---------------------------------------------------------------------|------------------------------------|------------------------|------------------------|------------------------|
| Mood swings                                                         | mild                               | 6 ( 0.4%)              | 3 ( 0.2%)              | 9 ( 0.3%)              |
|                                                                     | moderate                           | 5 ( 0.3%)              | 4 ( 0.3%)              | 9 ( 0.3%)              |
|                                                                     | severe                             | 1 ( <0.1%)             | 2 ( 0.1%)              | 3 ( 0.1%)              |
| Nervousness                                                         | mild                               | 0                      | 1 ( <0.1%)             | 1 ( <0.1%)             |
|                                                                     | moderate                           | 0                      | 1 ( <0.1%)             | 1 ( <0.1%)             |
| Nicotine dependence                                                 | moderate                           | 1 ( <0.1%)             | 0                      | 1 ( <0.1%)             |
| Obsessive-compulsive personality disorder                           | moderate                           | 0                      | 1 ( <0.1%)             | 1 ( <0.1%)             |
| Panic attack                                                        | mild                               | 1 ( <0.1%)             | 1 ( <0.1%)             | 2 ( <0.1%)             |
| Panic disorder                                                      | mild                               | 0                      | 2 ( 0.1%)              | 2 ( <0.1%)             |
|                                                                     | moderate                           | 1 ( <0.1%)             | 1 ( <0.1%)             | 2 ( <0.1%)             |
|                                                                     | severe                             | 0                      | 2 ( 0.1%)              | 2 ( <0.1%)             |
| Personality disorder                                                | mild                               | 1 ( <0.1%)             | 0                      | 1 ( <0.1%)             |
| Phobia of flying                                                    | mild                               | 0                      | 1 ( <0.1%)             | 1 ( <0.1%)             |
| Polysubstance dependence                                            | severe                             | 0                      | 1 ( <0.1%)             | 1 ( <0.1%)             |
| Post-traumatic stress disorder                                      | mild                               | 0                      | 1 ( <0.1%)             | 1 ( <0.1%)             |
|                                                                     | moderate                           | 1 ( <0.1%)             | 0                      | 1 ( <0.1%)             |
| Psychotic disorder                                                  | severe                             | 0                      | 1 ( <0.1%)             | 1 ( <0.1%)             |
| Sleep disorder                                                      | mild                               | 3 ( 0.2%)              | 1 ( <0.1%)             | 4 ( 0.1%)              |
|                                                                     | moderate                           | 2 ( 0.1%)              | 1 ( <0.1%)             | 3 ( 0.1%)              |
| Social phobia                                                       | moderate                           | 0                      | 1 ( <0.1%)             | 1 ( <0.1%)             |
| Stress                                                              | mild                               | 0                      | 2 ( 0.1%)              | 2 ( <0.1%)             |
|                                                                     | moderate                           | 2 ( 0.1%)              | 2 ( 0.1%)              | 4 ( 0.1%)              |
|                                                                     | severe                             | 1 ( <0.1%)             | 0                      | 1 ( <0.1%)             |
| Suicide attempt                                                     | severe                             | 1 ( <0.1%)             | 0                      | 1 ( <0.1%)             |

**Table 14.3.1 / 16: Number of subjects with adverse events by maximum intensity, primary system organ class and preferred term (FAS)**

| Primary system organ class<br>Preferred term<br>MedDRA version 14.0 | Maximum AE<br>maximum<br>intensity | LCS12<br>N=1432 (100%) | LCS16<br>N=1452 (100%) | Total<br>N=2884 (100%) |
|---------------------------------------------------------------------|------------------------------------|------------------------|------------------------|------------------------|
| Renal and urinary disorders                                         | mild                               | 18 ( 1.3%)             | 21 ( 1.4%)             | 39 ( 1.4%)             |
|                                                                     | moderate                           | 14 ( 1.0%)             | 7 ( 0.5%)              | 21 ( 0.7%)             |
|                                                                     | severe                             | 8 ( 0.6%)              | 3 ( 0.2%)              | 11 ( 0.4%)             |
| Calculus bladder                                                    | severe                             | 1 ( <0.1%)             | 0                      | 1 ( <0.1%)             |
| Calculus urinary                                                    | mild                               | 0                      | 1 ( <0.1%)             | 1 ( <0.1%)             |
| Chromaturia                                                         | mild                               | 0                      | 1 ( <0.1%)             | 1 ( <0.1%)             |
| Cystitis haemorrhagic                                               | severe                             | 1 ( <0.1%)             | 0                      | 1 ( <0.1%)             |
| Dysuria                                                             | mild                               | 8 ( 0.6%)              | 6 ( 0.4%)              | 14 ( 0.5%)             |
|                                                                     | moderate                           | 4 ( 0.3%)              | 1 ( <0.1%)             | 5 ( 0.2%)              |
|                                                                     | severe                             | 2 ( 0.1%)              | 0                      | 2 ( <0.1%)             |
| Haematuria                                                          | mild                               | 0                      | 2 ( 0.1%)              | 2 ( <0.1%)             |
|                                                                     | severe                             | 1 ( <0.1%)             | 0                      | 1 ( <0.1%)             |
| Hypertonic bladder                                                  | mild                               | 0                      | 2 ( 0.1%)              | 2 ( <0.1%)             |
| Micturition urgency                                                 | mild                               | 2 ( 0.1%)              | 3 ( 0.2%)              | 5 ( 0.2%)              |
| Nephrolithiasis                                                     | mild                               | 2 ( 0.1%)              | 1 ( <0.1%)             | 3 ( 0.1%)              |
|                                                                     | moderate                           | 4 ( 0.3%)              | 1 ( <0.1%)             | 5 ( 0.2%)              |
|                                                                     | severe                             | 2 ( 0.1%)              | 1 ( <0.1%)             | 3 ( 0.1%)              |
| Pollakiuria                                                         | mild                               | 2 ( 0.1%)              | 4 ( 0.3%)              | 6 ( 0.2%)              |
|                                                                     | moderate                           | 2 ( 0.1%)              | 4 ( 0.3%)              | 6 ( 0.2%)              |
| Polyuria                                                            | mild                               | 1 ( <0.1%)             | 1 ( <0.1%)             | 2 ( <0.1%)             |
| Renal cyst                                                          | mild                               | 0                      | 1 ( <0.1%)             | 1 ( <0.1%)             |
| Renal pain                                                          | moderate                           | 1 ( <0.1%)             | 0                      | 1 ( <0.1%)             |
| Strangury                                                           | moderate                           | 1 ( <0.1%)             | 0                      | 1 ( <0.1%)             |



**Table 14.3.1 / 16: Number of subjects with adverse events by maximum intensity, primary system organ class and preferred term (FAS)**

| Primary system organ class<br>Preferred term<br>MedDRA version 14.0 | Maximum AE<br>maximum<br>intensity | LCS12<br>N=1432 (100%) | LCS16<br>N=1452 (100%) | Total<br>N=2884 (100%) |
|---------------------------------------------------------------------|------------------------------------|------------------------|------------------------|------------------------|
| Stress urinary incontinence                                         | mild                               | 0                      | 1 (<0.1%)              | 1 (<0.1%)              |
|                                                                     | severe                             | 1 (<0.1%)              | 1 (<0.1%)              | 2 (<0.1%)              |
| Ureteric obstruction                                                | moderate                           | 0                      | 1 (<0.1%)              | 1 (<0.1%)              |
| Urethral cyst                                                       | mild                               | 0                      | 1 (<0.1%)              | 1 (<0.1%)              |
| Urinary incontinence                                                | mild                               | 2 ( 0.1%)              | 0                      | 2 (<0.1%)              |
|                                                                     | moderate                           | 1 (<0.1%)              | 0                      | 1 (<0.1%)              |
|                                                                     | severe                             | 0                      | 1 (<0.1%)              | 1 (<0.1%)              |
| Urinary retention                                                   | mild                               | 0                      | 1 (<0.1%)              | 1 (<0.1%)              |
| Urinary tract disorder                                              | moderate                           | 1 (<0.1%)              | 0                      | 1 (<0.1%)              |
| Urinary tract inflammation                                          | mild                               | 1 (<0.1%)              | 0                      | 1 (<0.1%)              |
| Urinary tract pain                                                  | mild                               | 2 ( 0.1%)              | 1 (<0.1%)              | 3 ( 0.1%)              |
| Urine odour abnormal                                                | mild                               | 0                      | 1 (<0.1%)              | 1 (<0.1%)              |
| Reproductive system and breast disorders                            | mild                               | 323 ( 22.6%)           | 378 ( 26.0%)           | 701 ( 24.3%)           |
|                                                                     | moderate                           | 269 ( 18.8%)           | 292 ( 20.1%)           | 561 ( 19.5%)           |
|                                                                     | severe                             | 88 ( 6.1%)             | 93 ( 6.4%)             | 181 ( 6.3%)            |
| Adenomyosis                                                         | mild                               | 1 (<0.1%)              | 0                      | 1 (<0.1%)              |
| Adnexa uteri mass                                                   | moderate                           | 1 (<0.1%)              | 0                      | 1 (<0.1%)              |
| Adnexa uteri pain                                                   | mild                               | 0                      | 2 ( 0.1%)              | 2 (<0.1%)              |
|                                                                     | moderate                           | 3 ( 0.2%)              | 2 ( 0.1%)              | 5 ( 0.2%)              |
|                                                                     | severe                             | 0                      | 1 (<0.1%)              | 1 (<0.1%)              |
| Amenorrhoea                                                         | mild                               | 0                      | 5 ( 0.3%)              | 5 ( 0.2%)              |
|                                                                     | moderate                           | 0                      | 1 (<0.1%)              | 1 (<0.1%)              |
| Atrophic vulvovaginitis                                             | mild                               | 1 (<0.1%)              | 0                      | 1 (<0.1%)              |

**Table 14.3.1 / 16: Number of subjects with adverse events by maximum intensity, primary system organ class and preferred term (FAS)**

| Primary system organ class<br>Preferred term<br>MedDRA version 14.0 | Maximum AE<br>maximum<br>intensity | LCS12<br>N=1432 (100%)                 | LCS16<br>N=1452 (100%)                | Total<br>N=2884 (100%)                 |
|---------------------------------------------------------------------|------------------------------------|----------------------------------------|---------------------------------------|----------------------------------------|
| Bartholin's cyst                                                    | mild                               | 0                                      | 1 ( <0.1%)                            | 1 ( <0.1%)                             |
| Breast calcifications                                               | mild                               | 1 ( <0.1%)                             | 0                                     | 1 ( <0.1%)                             |
| Breast cyst                                                         | mild                               | 3 ( 0.2%)                              | 2 ( 0.1%)                             | 5 ( 0.2%)                              |
| Breast discharge                                                    | mild<br>moderate                   | 0<br>0                                 | 8 ( 0.6%)<br>2 ( 0.1%)                | 8 ( 0.3%)<br>2 ( <0.1%)                |
| Breast discomfort                                                   | mild<br>moderate                   | 3 ( 0.2%)<br>1 ( <0.1%)                | 2 ( 0.1%)<br>6 ( 0.4%)                | 5 ( 0.2%)<br>7 ( 0.2%)                 |
| Breast disorder female                                              | mild                               | 0                                      | 1 ( <0.1%)                            | 1 ( <0.1%)                             |
| Breast dysplasia                                                    | moderate                           | 1 ( <0.1%)                             | 0                                     | 1 ( <0.1%)                             |
| Breast engorgement                                                  | mild                               | 1 ( <0.1%)                             | 0                                     | 1 ( <0.1%)                             |
| Breast enlargement                                                  | mild<br>severe                     | 0<br>0                                 | 3 ( 0.2%)<br>1 ( <0.1%)               | 3 ( 0.1%)<br>1 ( <0.1%)                |
| Breast mass                                                         | mild<br>moderate<br>severe         | 6 ( 0.4%)<br>0<br>1 ( <0.1%)           | 5 ( 0.3%)<br>2 ( 0.1%)<br>0           | 11 ( 0.4%)<br>2 ( <0.1%)<br>1 ( <0.1%) |
| Breast pain                                                         | mild<br>moderate<br>severe         | 21 ( 1.5%)<br>13 ( 0.9%)<br>2 ( 0.1%)  | 17 ( 1.2%)<br>21 ( 1.4%)<br>5 ( 0.3%) | 38 ( 1.3%)<br>34 ( 1.2%)<br>7 ( 0.2%)  |
| Breast swelling                                                     | mild<br>moderate                   | 0<br>1 ( <0.1%)                        | 1 ( <0.1%)<br>1 ( <0.1%)              | 1 ( <0.1%)<br>2 ( <0.1%)               |
| Breast tenderness                                                   | mild<br>moderate<br>severe         | 20 ( 1.4%)<br>11 ( 0.8%)<br>1 ( <0.1%) | 20 ( 1.4%)<br>12 ( 0.8%)<br>3 ( 0.2%) | 40 ( 1.4%)<br>23 ( 0.8%)<br>4 ( 0.1%)  |
| Cervical cyst                                                       | mild                               | 0                                      | 1 ( <0.1%)                            | 1 ( <0.1%)                             |

**Table 14.3.1 / 16: Number of subjects with adverse events by maximum intensity, primary system organ class and preferred term (FAS)**

| Primary system organ class<br>Preferred term<br>MedDRA version 14.0 | Maximum AE<br>maximum<br>intensity | LCS12<br>N=1432 (100%) | LCS16<br>N=1452 (100%) | Total<br>N=2884 (100%) |
|---------------------------------------------------------------------|------------------------------------|------------------------|------------------------|------------------------|
| Cervical discharge                                                  | mild                               | 2 ( 0.1%)              | 0                      | 2 ( <0.1%)             |
| Cervical dysplasia                                                  | mild                               | 79 ( 5.5%)             | 89 ( 6.1%)             | 168 ( 5.8%)            |
|                                                                     | moderate                           | 26 ( 1.8%)             | 25 ( 1.7%)             | 51 ( 1.8%)             |
|                                                                     | severe                             | 1 ( <0.1%)             | 1 ( <0.1%)             | 2 ( <0.1%)             |
| Cervical friability                                                 | mild                               | 0                      | 1 ( <0.1%)             | 1 ( <0.1%)             |
| Cervical polyp                                                      | mild                               | 1 ( <0.1%)             | 2 ( 0.1%)              | 3 ( 0.1%)              |
| Cervix disorder                                                     | severe                             | 0                      | 1 ( <0.1%)             | 1 ( <0.1%)             |
| Cervix erythema                                                     | mild                               | 0                      | 2 ( 0.1%)              | 2 ( <0.1%)             |
| Cervix haemorrhage uterine                                          | mild                               | 0                      | 1 ( <0.1%)             | 1 ( <0.1%)             |
| Cervix inflammation                                                 | mild                               | 1 ( <0.1%)             | 0                      | 1 ( <0.1%)             |
| Cervix oedema                                                       | moderate                           | 0                      | 1 ( <0.1%)             | 1 ( <0.1%)             |
| Coital bleeding                                                     | mild                               | 8 ( 0.6%)              | 11 ( 0.8%)             | 19 ( 0.7%)             |
|                                                                     | moderate                           | 6 ( 0.4%)              | 2 ( 0.1%)              | 8 ( 0.3%)              |
|                                                                     | severe                             | 0                      | 1 ( <0.1%)             | 1 ( <0.1%)             |
| Dysfunctional uterine bleeding                                      | mild                               | 1 ( <0.1%)             | 0                      | 1 ( <0.1%)             |
|                                                                     | moderate                           | 2 ( 0.1%)              | 4 ( 0.3%)              | 6 ( 0.2%)              |
| Dysmenorrhoea                                                       | mild                               | 43 ( 3.0%)             | 24 ( 1.7%)             | 67 ( 2.3%)             |
|                                                                     | moderate                           | 66 ( 4.6%)             | 61 ( 4.2%)             | 127 ( 4.4%)            |
|                                                                     | severe                             | 21 ( 1.5%)             | 23 ( 1.6%)             | 44 ( 1.5%)             |
| Dyspareunia                                                         | mild                               | 12 ( 0.8%)             | 11 ( 0.8%)             | 23 ( 0.8%)             |
|                                                                     | moderate                           | 19 ( 1.3%)             | 14 ( 1.0%)             | 33 ( 1.1%)             |
|                                                                     | severe                             | 2 ( 0.1%)              | 3 ( 0.2%)              | 5 ( 0.2%)              |
| Ectropion of cervix                                                 | mild                               | 1 ( <0.1%)             | 0                      | 1 ( <0.1%)             |
|                                                                     | severe                             | 1 ( <0.1%)             | 1 ( <0.1%)             | 2 ( <0.1%)             |

**Table 14.3.1 / 16: Number of subjects with adverse events by maximum intensity, primary system organ class and preferred term (FAS)**

| Primary system organ class<br>Preferred term<br>MedDRA version 14.0 | Maximum AE<br>maximum<br>intensity | LCS12<br>N=1432 (100%) | LCS16<br>N=1452 (100%) | Total<br>N=2884 (100%) |
|---------------------------------------------------------------------|------------------------------------|------------------------|------------------------|------------------------|
| Endometriosis                                                       | mild                               | 3 ( 0.2%)              | 1 (<0.1%)              | 4 ( 0.1%)              |
|                                                                     | moderate                           | 2 ( 0.1%)              | 1 (<0.1%)              | 3 ( 0.1%)              |
|                                                                     | severe                             | 3 ( 0.2%)              | 1 (<0.1%)              | 4 ( 0.1%)              |
| Fibrocystic breast disease                                          | mild                               | 3 ( 0.2%)              | 2 ( 0.1%)              | 5 ( 0.2%)              |
|                                                                     | moderate                           | 0                      | 3 ( 0.2%)              | 3 ( 0.1%)              |
| Galactorrhoea                                                       | mild                               | 4 ( 0.3%)              | 8 ( 0.6%)              | 12 ( 0.4%)             |
| Genital cyst                                                        | mild                               | 0                      | 1 (<0.1%)              | 1 (<0.1%)              |
| Genital discharge                                                   | mild                               | 7 ( 0.5%)              | 7 ( 0.5%)              | 14 ( 0.5%)             |
|                                                                     | moderate                           | 2 ( 0.1%)              | 2 ( 0.1%)              | 4 ( 0.1%)              |
| Genital haemorrhage                                                 | mild                               | 1 (<0.1%)              | 0                      | 1 (<0.1%)              |
| Genital lesion                                                      | mild                               | 2 ( 0.1%)              | 0                      | 2 (<0.1%)              |
| Genital rash                                                        | mild                               | 0                      | 1 (<0.1%)              | 1 (<0.1%)              |
| Haemorrhagic ovarian cyst                                           | mild                               | 8 ( 0.6%)              | 12 ( 0.8%)             | 20 ( 0.7%)             |
|                                                                     | moderate                           | 3 ( 0.2%)              | 5 ( 0.3%)              | 8 ( 0.3%)              |
|                                                                     | severe                             | 2 ( 0.1%)              | 2 ( 0.1%)              | 4 ( 0.1%)              |
| Hydrometra                                                          | mild                               | 2 ( 0.1%)              | 0                      | 2 (<0.1%)              |
| Hypomenorrhoea                                                      | mild                               | 2 ( 0.1%)              | 1 (<0.1%)              | 3 ( 0.1%)              |
| Menometrorrhagia                                                    | severe                             | 2 ( 0.1%)              | 0                      | 2 (<0.1%)              |
| Menorrhagia                                                         | mild                               | 1 (<0.1%)              | 3 ( 0.2%)              | 4 ( 0.1%)              |
|                                                                     | moderate                           | 3 ( 0.2%)              | 5 ( 0.3%)              | 8 ( 0.3%)              |
|                                                                     | severe                             | 2 ( 0.1%)              | 2 ( 0.1%)              | 4 ( 0.1%)              |
| Menstrual disorder                                                  | mild                               | 3 ( 0.2%)              | 0                      | 3 ( 0.1%)              |
|                                                                     | moderate                           | 0                      | 1 (<0.1%)              | 1 (<0.1%)              |

**Table 14.3.1 / 16: Number of subjects with adverse events by maximum intensity, primary system organ class and preferred term (FAS)**

| Primary system organ class<br>Preferred term<br>MedDRA version 14.0 | Maximum AE<br>maximum<br>intensity | LCS12<br>N=1432 (100%) | LCS16<br>N=1452 (100%) | Total<br>N=2884 (100%) |
|---------------------------------------------------------------------|------------------------------------|------------------------|------------------------|------------------------|
| Menstruation irregular                                              | mild                               | 1 ( <0.1%)             | 1 ( <0.1%)             | 2 ( <0.1%)             |
|                                                                     | moderate                           | 3 ( 0.2%)              | 2 ( 0.1%)              | 5 ( 0.2%)              |
| Metrorrhagia                                                        | mild                               | 6 ( 0.4%)              | 7 ( 0.5%)              | 13 ( 0.5%)             |
|                                                                     | moderate                           | 8 ( 0.6%)              | 3 ( 0.2%)              | 11 ( 0.4%)             |
|                                                                     | severe                             | 2 ( 0.1%)              | 2 ( 0.1%)              | 4 ( 0.1%)              |
| Nipple exudate bloody                                               | mild                               | 0                      | 1 ( <0.1%)             | 1 ( <0.1%)             |
| Nipple pain                                                         | mild                               | 1 ( <0.1%)             | 1 ( <0.1%)             | 2 ( <0.1%)             |
|                                                                     | moderate                           | 1 ( <0.1%)             | 1 ( <0.1%)             | 2 ( <0.1%)             |
|                                                                     | severe                             | 1 ( <0.1%)             | 0                      | 1 ( <0.1%)             |
| Oligomenorrhoea                                                     | moderate                           | 0                      | 2 ( 0.1%)              | 2 ( <0.1%)             |
| Ovarian cyst                                                        | mild                               | 154 ( 10.8%)           | 247 ( 17.0%)           | 401 ( 13.9%)           |
|                                                                     | moderate                           | 25 ( 1.7%)             | 50 ( 3.4%)             | 75 ( 2.6%)             |
|                                                                     | severe                             | 7 ( 0.5%)              | 7 ( 0.5%)              | 14 ( 0.5%)             |
| Ovarian cyst ruptured                                               | mild                               | 0                      | 1 ( <0.1%)             | 1 ( <0.1%)             |
|                                                                     | moderate                           | 1 ( <0.1%)             | 2 ( 0.1%)              | 3 ( 0.1%)              |
|                                                                     | severe                             | 1 ( <0.1%)             | 4 ( 0.3%)              | 5 ( 0.2%)              |
| Ovarian cyst torsion                                                | severe                             | 0                      | 1 ( <0.1%)             | 1 ( <0.1%)             |
| Ovarian disorder                                                    | mild                               | 0                      | 1 ( <0.1%)             | 1 ( <0.1%)             |
| Ovarian enlargement                                                 | mild                               | 1 ( <0.1%)             | 1 ( <0.1%)             | 2 ( <0.1%)             |
| Ovarian mass                                                        | mild                               | 1 ( <0.1%)             | 2 ( 0.1%)              | 3 ( 0.1%)              |
| Ovulation pain                                                      | mild                               | 1 ( <0.1%)             | 2 ( 0.1%)              | 3 ( 0.1%)              |
|                                                                     | moderate                           | 5 ( 0.3%)              | 0                      | 5 ( 0.2%)              |
| Parovarian cyst                                                     | mild                               | 2 ( 0.1%)              | 0                      | 2 ( <0.1%)             |
|                                                                     | moderate                           | 1 ( <0.1%)             | 0                      | 1 ( <0.1%)             |
| Pelvic adhesions                                                    | moderate                           | 0                      | 1 ( <0.1%)             | 1 ( <0.1%)             |

**Table 14.3.1 / 16: Number of subjects with adverse events by maximum intensity, primary system organ class and preferred term (FAS)**

| Primary system organ class<br>Preferred term<br>MedDRA version 14.0 | Maximum AE<br>maximum<br>intensity | LCS12<br>N=1432 (100%) | LCS16<br>N=1452 (100%) | Total<br>N=2884 (100%) |
|---------------------------------------------------------------------|------------------------------------|------------------------|------------------------|------------------------|
| Pelvic congestion                                                   | mild                               | 1 ( <0.1%)             | 0                      | 1 ( <0.1%)             |
| Pelvic discomfort                                                   | mild                               | 0                      | 1 ( <0.1%)             | 1 ( <0.1%)             |
|                                                                     | moderate                           | 6 ( 0.4%)              | 1 ( <0.1%)             | 7 ( 0.2%)              |
| Pelvic fluid collection                                             | moderate                           | 1 ( <0.1%)             | 0                      | 1 ( <0.1%)             |
| Pelvic pain                                                         | mild                               | 18 ( 1.3%)             | 32 ( 2.2%)             | 50 ( 1.7%)             |
|                                                                     | moderate                           | 52 ( 3.6%)             | 59 ( 4.1%)             | 111 ( 3.8%)            |
|                                                                     | severe                             | 26 ( 1.8%)             | 32 ( 2.2%)             | 58 ( 2.0%)             |
| Pelvic prolapse                                                     | moderate                           | 1 ( <0.1%)             | 0                      | 1 ( <0.1%)             |
| Perineal pain                                                       | moderate                           | 1 ( <0.1%)             | 0                      | 1 ( <0.1%)             |
| Polycystic ovaries                                                  | mild                               | 4 ( 0.3%)              | 2 ( 0.1%)              | 6 ( 0.2%)              |
| Polymenorrhoea                                                      | mild                               | 1 ( <0.1%)             | 1 ( <0.1%)             | 2 ( <0.1%)             |
| Premenstrual syndrome                                               | mild                               | 8 ( 0.6%)              | 4 ( 0.3%)              | 12 ( 0.4%)             |
|                                                                     | moderate                           | 8 ( 0.6%)              | 6 ( 0.4%)              | 14 ( 0.5%)             |
|                                                                     | severe                             | 1 ( <0.1%)             | 2 ( 0.1%)              | 3 ( 0.1%)              |
| Pruritus genital                                                    | mild                               | 1 ( <0.1%)             | 0                      | 1 ( <0.1%)             |
| Uterine cervical erosion                                            | mild                               | 1 ( <0.1%)             | 0                      | 1 ( <0.1%)             |
| Uterine cervical pain                                               | mild                               | 2 ( 0.1%)              | 0                      | 2 ( <0.1%)             |
| Uterine haemorrhage                                                 | mild                               | 1 ( <0.1%)             | 5 ( 0.3%)              | 6 ( 0.2%)              |
|                                                                     | moderate                           | 4 ( 0.3%)              | 2 ( 0.1%)              | 6 ( 0.2%)              |
|                                                                     | severe                             | 3 ( 0.2%)              | 0                      | 3 ( 0.1%)              |
| Uterine inflammation                                                | mild                               | 0                      | 1 ( <0.1%)             | 1 ( <0.1%)             |
| Uterine pain                                                        | mild                               | 1 ( <0.1%)             | 1 ( <0.1%)             | 2 ( <0.1%)             |
|                                                                     | moderate                           | 1 ( <0.1%)             | 1 ( <0.1%)             | 2 ( <0.1%)             |

**Table 14.3.1 / 16: Number of subjects with adverse events by maximum intensity, primary system organ class and preferred term (FAS)**

| Primary system organ class<br>Preferred term<br>MedDRA version 14.0 | Maximum AE<br>maximum<br>intensity | LCS12<br>N=1432 (100%) | LCS16<br>N=1452 (100%) | Total<br>N=2884 (100%) |
|---------------------------------------------------------------------|------------------------------------|------------------------|------------------------|------------------------|
| Uterine polyp                                                       | mild                               | 2 ( 0.1%)              | 1 ( <0.1%)             | 3 ( 0.1%)              |
| Uterine prolapse                                                    | severe                             | 1 ( <0.1%)             | 0                      | 1 ( <0.1%)             |
| Uterine spasm                                                       | mild                               | 6 ( 0.4%)              | 9 ( 0.6%)              | 15 ( 0.5%)             |
|                                                                     | moderate                           | 15 ( 1.0%)             | 21 ( 1.4%)             | 36 ( 1.2%)             |
|                                                                     | severe                             | 9 ( 0.6%)              | 9 ( 0.6%)              | 18 ( 0.6%)             |
| Uterine tenderness                                                  | mild                               | 1 ( <0.1%)             | 1 ( <0.1%)             | 2 ( <0.1%)             |
|                                                                     | moderate                           | 0                      | 1 ( <0.1%)             | 1 ( <0.1%)             |
| Vaginal cyst                                                        | mild                               | 1 ( <0.1%)             | 0                      | 1 ( <0.1%)             |
| Vaginal discharge                                                   | mild                               | 33 ( 2.3%)             | 35 ( 2.4%)             | 68 ( 2.4%)             |
|                                                                     | moderate                           | 18 ( 1.3%)             | 18 ( 1.2%)             | 36 ( 1.2%)             |
|                                                                     | severe                             | 4 ( 0.3%)              | 5 ( 0.3%)              | 9 ( 0.3%)              |
| Vaginal disorder                                                    | mild                               | 3 ( 0.2%)              | 3 ( 0.2%)              | 6 ( 0.2%)              |
|                                                                     | moderate                           | 1 ( <0.1%)             | 1 ( <0.1%)             | 2 ( <0.1%)             |
| Vaginal haemorrhage                                                 | mild                               | 28 ( 2.0%)             | 31 ( 2.1%)             | 59 ( 2.0%)             |
|                                                                     | moderate                           | 36 ( 2.5%)             | 39 ( 2.7%)             | 75 ( 2.6%)             |
|                                                                     | severe                             | 2 ( 0.1%)              | 3 ( 0.2%)              | 5 ( 0.2%)              |
| Vaginal lesion                                                      | moderate                           | 1 ( <0.1%)             | 0                      | 1 ( <0.1%)             |
| Vaginal odour                                                       | mild                               | 5 ( 0.3%)              | 6 ( 0.4%)              | 11 ( 0.4%)             |
|                                                                     | moderate                           | 1 ( <0.1%)             | 1 ( <0.1%)             | 2 ( <0.1%)             |
| Vaginal perforation                                                 | mild                               | 0                      | 1 ( <0.1%)             | 1 ( <0.1%)             |
| Vaginal ulceration                                                  | mild                               | 0                      | 1 ( <0.1%)             | 1 ( <0.1%)             |
| Vaginal wall congestion                                             | mild                               | 1 ( <0.1%)             | 0                      | 1 ( <0.1%)             |
| Vulval disorder                                                     | moderate                           | 1 ( <0.1%)             | 0                      | 1 ( <0.1%)             |

**Table 14.3.1 / 16: Number of subjects with adverse events by maximum intensity, primary system organ class and preferred term (FAS)**

| Primary system organ class<br>Preferred term<br>MedDRA version 14.0 | Maximum AE<br>maximum<br>intensity | LCS12<br>N=1432 (100%) | LCS16<br>N=1452 (100%) | Total<br>N=2884 (100%) |
|---------------------------------------------------------------------|------------------------------------|------------------------|------------------------|------------------------|
| Vulvovaginal burning sensation                                      | mild                               | 1 ( <0.1%)             | 3 ( 0.2%)              | 4 ( 0.1%)              |
|                                                                     | moderate                           | 0                      | 1 ( <0.1%)             | 1 ( <0.1%)             |
| Vulvovaginal discomfort                                             | mild                               | 2 ( 0.1%)              | 2 ( 0.1%)              | 4 ( 0.1%)              |
|                                                                     | moderate                           | 4 ( 0.3%)              | 0                      | 4 ( 0.1%)              |
| Vulvovaginal dryness                                                | mild                               | 1 ( <0.1%)             | 4 ( 0.3%)              | 5 ( 0.2%)              |
|                                                                     | moderate                           | 2 ( 0.1%)              | 1 ( <0.1%)             | 3 ( 0.1%)              |
| Vulvovaginal erythema                                               | mild                               | 0                      | 2 ( 0.1%)              | 2 ( <0.1%)             |
| Vulvovaginal pain                                                   | mild                               | 2 ( 0.1%)              | 1 ( <0.1%)             | 3 ( 0.1%)              |
|                                                                     | moderate                           | 1 ( <0.1%)             | 1 ( <0.1%)             | 2 ( <0.1%)             |
| Vulvovaginal pruritus                                               | mild                               | 8 ( 0.6%)              | 14 ( 1.0%)             | 22 ( 0.8%)             |
|                                                                     | moderate                           | 7 ( 0.5%)              | 3 ( 0.2%)              | 10 ( 0.3%)             |
|                                                                     | severe                             | 1 ( <0.1%)             | 0                      | 1 ( <0.1%)             |
| Vulvovaginal swelling                                               | mild                               | 1 ( <0.1%)             | 0                      | 1 ( <0.1%)             |
|                                                                     | moderate                           | 0                      | 1 ( <0.1%)             | 1 ( <0.1%)             |
| Respiratory, thoracic and mediastinal disorders                     | mild                               | 33 ( 2.3%)             | 27 ( 1.9%)             | 60 ( 2.1%)             |
|                                                                     | moderate                           | 31 ( 2.2%)             | 34 ( 2.3%)             | 65 ( 2.3%)             |
|                                                                     | severe                             | 7 ( 0.5%)              | 9 ( 0.6%)              | 16 ( 0.6%)             |
| Allergic sinusitis                                                  | mild                               | 1 ( <0.1%)             | 1 ( <0.1%)             | 2 ( <0.1%)             |
| Asthma                                                              | mild                               | 4 ( 0.3%)              | 1 ( <0.1%)             | 5 ( 0.2%)              |
|                                                                     | moderate                           | 6 ( 0.4%)              | 8 ( 0.6%)              | 14 ( 0.5%)             |
|                                                                     | severe                             | 1 ( <0.1%)             | 2 ( 0.1%)              | 3 ( 0.1%)              |
| Atelectasis                                                         | moderate                           | 0                      | 1 ( <0.1%)             | 1 ( <0.1%)             |
| Bronchospasm                                                        | moderate                           | 2 ( 0.1%)              | 1 ( <0.1%)             | 3 ( 0.1%)              |
|                                                                     | severe                             | 0                      | 1 ( <0.1%)             | 1 ( <0.1%)             |



**Table 14.3.1 / 16: Number of subjects with adverse events by maximum intensity, primary system organ class and preferred term (FAS)**

| Primary system organ class<br>Preferred term<br>MedDRA version 14.0 | Maximum AE<br>maximum<br>intensity | LCS12<br>N=1432 (100%) | LCS16<br>N=1452 (100%) | Total<br>N=2884 (100%) |
|---------------------------------------------------------------------|------------------------------------|------------------------|------------------------|------------------------|
| Cough                                                               | mild                               | 6 ( 0.4%)              | 4 ( 0.3%)              | 10 ( 0.3%)             |
|                                                                     | moderate                           | 5 ( 0.3%)              | 7 ( 0.5%)              | 12 ( 0.4%)             |
|                                                                     | severe                             | 2 ( 0.1%)              | 2 ( 0.1%)              | 4 ( 0.1%)              |
| Diaphragmatic hernia                                                | moderate                           | 0                      | 1 ( <0.1%)             | 1 ( <0.1%)             |
| Dyspnoea                                                            | mild                               | 0                      | 1 ( <0.1%)             | 1 ( <0.1%)             |
|                                                                     | moderate                           | 1 ( <0.1%)             | 0                      | 1 ( <0.1%)             |
|                                                                     | severe                             | 0                      | 1 ( <0.1%)             | 1 ( <0.1%)             |
| Epiglottic cyst                                                     | moderate                           | 1 ( <0.1%)             | 0                      | 1 ( <0.1%)             |
| Epistaxis                                                           | mild                               | 3 ( 0.2%)              | 0                      | 3 ( 0.1%)              |
|                                                                     | moderate                           | 0                      | 1 ( <0.1%)             | 1 ( <0.1%)             |
| Hyperventilation                                                    | mild                               | 1 ( <0.1%)             | 0                      | 1 ( <0.1%)             |
|                                                                     | severe                             | 0                      | 1 ( <0.1%)             | 1 ( <0.1%)             |
| Hypoxia                                                             | moderate                           | 0                      | 1 ( <0.1%)             | 1 ( <0.1%)             |
| Nasal congestion                                                    | mild                               | 1 ( <0.1%)             | 0                      | 1 ( <0.1%)             |
|                                                                     | moderate                           | 1 ( <0.1%)             | 1 ( <0.1%)             | 2 ( <0.1%)             |
| Nasal disorder                                                      | mild                               | 1 ( <0.1%)             | 0                      | 1 ( <0.1%)             |
| Nasal oedema                                                        | moderate                           | 1 ( <0.1%)             | 0                      | 1 ( <0.1%)             |
| Nasal polyps                                                        | moderate                           | 1 ( <0.1%)             | 1 ( <0.1%)             | 2 ( <0.1%)             |
| Oropharyngeal pain                                                  | mild                               | 5 ( 0.3%)              | 9 ( 0.6%)              | 14 ( 0.5%)             |
|                                                                     | moderate                           | 8 ( 0.6%)              | 8 ( 0.6%)              | 16 ( 0.6%)             |
|                                                                     | severe                             | 4 ( 0.3%)              | 0                      | 4 ( 0.1%)              |
| Pleural effusion                                                    | moderate                           | 0                      | 1 ( <0.1%)             | 1 ( <0.1%)             |
| Pleurisy                                                            | severe                             | 1 ( <0.1%)             | 1 ( <0.1%)             | 2 ( <0.1%)             |
| Pneumonitis                                                         | moderate                           | 0                      | 1 ( <0.1%)             | 1 ( <0.1%)             |

**Table 14.3.1 / 16: Number of subjects with adverse events by maximum intensity, primary system organ class and preferred term (FAS)**

| Primary system organ class<br>Preferred term<br>MedDRA version 14.0 | Maximum AE<br>maximum<br>intensity | LCS12<br>N=1432 (100%) | LCS16<br>N=1452 (100%) | Total<br>N=2884 (100%) |
|---------------------------------------------------------------------|------------------------------------|------------------------|------------------------|------------------------|
| Pneumothorax                                                        | moderate                           | 1 ( <0.1%)             | 0                      | 1 ( <0.1%)             |
| Pulmonary congestion                                                | mild                               | 1 ( <0.1%)             | 0                      | 1 ( <0.1%)             |
| Respiratory tract congestion                                        | moderate                           | 1 ( <0.1%)             | 0                      | 1 ( <0.1%)             |
| Respiratory tract inflammation                                      | mild                               | 1 ( <0.1%)             | 0                      | 1 ( <0.1%)             |
| Rhinitis allergic                                                   | mild                               | 6 ( 0.4%)              | 6 ( 0.4%)              | 12 ( 0.4%)             |
|                                                                     | moderate                           | 4 ( 0.3%)              | 5 ( 0.3%)              | 9 ( 0.3%)              |
| Rhinitis seasonal                                                   | mild                               | 0                      | 1 ( <0.1%)             | 1 ( <0.1%)             |
|                                                                     | moderate                           | 1 ( <0.1%)             | 1 ( <0.1%)             | 2 ( <0.1%)             |
| Rhinorrhoea                                                         | mild                               | 1 ( <0.1%)             | 0                      | 1 ( <0.1%)             |
| Sinus congestion                                                    | mild                               | 5 ( 0.3%)              | 2 ( 0.1%)              | 7 ( 0.2%)              |
|                                                                     | moderate                           | 1 ( <0.1%)             | 0                      | 1 ( <0.1%)             |
| Sinus polyp                                                         | severe                             | 0                      | 1 ( <0.1%)             | 1 ( <0.1%)             |
| Sleep apnoea syndrome                                               | severe                             | 0                      | 1 ( <0.1%)             | 1 ( <0.1%)             |
| Tonsillar disorder                                                  | mild                               | 0                      | 1 ( <0.1%)             | 1 ( <0.1%)             |
| Upper respiratory tract inflammation                                | mild                               | 0                      | 2 ( 0.1%)              | 2 ( <0.1%)             |
| Wheezing                                                            | mild                               | 1 ( <0.1%)             | 0                      | 1 ( <0.1%)             |
| Skin and subcutaneous tissue disorders                              | mild                               | 120 ( 8.4%)            | 145 ( 10.0%)           | 265 ( 9.2%)            |
|                                                                     | moderate                           | 104 ( 7.3%)            | 98 ( 6.7%)             | 202 ( 7.0%)            |
|                                                                     | severe                             | 18 ( 1.3%)             | 11 ( 0.8%)             | 29 ( 1.0%)             |
| Acne                                                                | mild                               | 81 ( 5.7%)             | 104 ( 7.2%)            | 185 ( 6.4%)            |
|                                                                     | moderate                           | 70 ( 4.9%)             | 58 ( 4.0%)             | 128 ( 4.4%)            |
|                                                                     | severe                             | 12 ( 0.8%)             | 7 ( 0.5%)              | 19 ( 0.7%)             |

**Table 14.3.1 / 16: Number of subjects with adverse events by maximum intensity, primary system organ class and preferred term (FAS)**

| Primary system organ class<br>Preferred term<br>MedDRA version 14.0 | Maximum AE<br>maximum<br>intensity | LCS12<br>N=1432 (100%) | LCS16<br>N=1452 (100%) | Total<br>N=2884 (100%) |
|---------------------------------------------------------------------|------------------------------------|------------------------|------------------------|------------------------|
| Acne cystic                                                         | mild                               | 1 ( <0.1%)             | 0                      | 1 ( <0.1%)             |
|                                                                     | severe                             | 1 ( <0.1%)             | 0                      | 1 ( <0.1%)             |
| Alopecia                                                            | mild                               | 10 ( 0.7%)             | 8 ( 0.6%)              | 18 ( 0.6%)             |
|                                                                     | moderate                           | 4 ( 0.3%)              | 4 ( 0.3%)              | 8 ( 0.3%)              |
|                                                                     | severe                             | 1 ( <0.1%)             | 1 ( <0.1%)             | 2 ( <0.1%)             |
| Alopecia areata                                                     | mild                               | 1 ( <0.1%)             | 0                      | 1 ( <0.1%)             |
|                                                                     | moderate                           | 1 ( <0.1%)             | 0                      | 1 ( <0.1%)             |
| Chloasma                                                            | mild                               | 2 ( 0.1%)              | 0                      | 2 ( <0.1%)             |
|                                                                     | moderate                           | 1 ( <0.1%)             | 0                      | 1 ( <0.1%)             |
| Cold sweat                                                          | mild                               | 1 ( <0.1%)             | 0                      | 1 ( <0.1%)             |
| Dandruff                                                            | mild                               | 1 ( <0.1%)             | 1 ( <0.1%)             | 2 ( <0.1%)             |
| Dermal cyst                                                         | mild                               | 2 ( 0.1%)              | 0                      | 2 ( <0.1%)             |
| Dermatitis                                                          | mild                               | 7 ( 0.5%)              | 3 ( 0.2%)              | 10 ( 0.3%)             |
|                                                                     | moderate                           | 1 ( <0.1%)             | 4 ( 0.3%)              | 5 ( 0.2%)              |
| Dermatitis allergic                                                 | mild                               | 3 ( 0.2%)              | 2 ( 0.1%)              | 5 ( 0.2%)              |
|                                                                     | moderate                           | 3 ( 0.2%)              | 3 ( 0.2%)              | 6 ( 0.2%)              |
| Dermatitis atopic                                                   | mild                               | 1 ( <0.1%)             | 3 ( 0.2%)              | 4 ( 0.1%)              |
|                                                                     | moderate                           | 1 ( <0.1%)             | 2 ( 0.1%)              | 3 ( 0.1%)              |
| Dermatitis contact                                                  | mild                               | 1 ( <0.1%)             | 2 ( 0.1%)              | 3 ( 0.1%)              |
|                                                                     | moderate                           | 0                      | 3 ( 0.2%)              | 3 ( 0.1%)              |
|                                                                     | severe                             | 1 ( <0.1%)             | 0                      | 1 ( <0.1%)             |
| Drug eruption                                                       | severe                             | 1 ( <0.1%)             | 0                      | 1 ( <0.1%)             |
| Dry skin                                                            | mild                               | 0                      | 1 ( <0.1%)             | 1 ( <0.1%)             |
| Dyshidrosis                                                         | moderate                           | 1 ( <0.1%)             | 0                      | 1 ( <0.1%)             |

**Table 14.3.1 / 16: Number of subjects with adverse events by maximum intensity, primary system organ class and preferred term (FAS)**

| Primary system organ class<br>Preferred term<br>MedDRA version 14.0 | Maximum AE<br>maximum<br>intensity | LCS12<br>N=1432 (100%) | LCS16<br>N=1452 (100%) | Total<br>N=2884 (100%) |
|---------------------------------------------------------------------|------------------------------------|------------------------|------------------------|------------------------|
| Eczema                                                              | mild                               | 4 ( 0.3%)              | 6 ( 0.4%)              | 10 ( 0.3%)             |
|                                                                     | moderate                           | 2 ( 0.1%)              | 2 ( 0.1%)              | 4 ( 0.1%)              |
| Erythema                                                            | mild                               | 2 ( 0.1%)              | 0                      | 2 ( <0.1%)             |
| Erythema multiforme                                                 | moderate                           | 1 ( <0.1%)             | 0                      | 1 ( <0.1%)             |
| Hidradenitis                                                        | mild                               | 1 ( <0.1%)             | 0                      | 1 ( <0.1%)             |
| Hirsutism                                                           | mild                               | 3 ( 0.2%)              | 7 ( 0.5%)              | 10 ( 0.3%)             |
|                                                                     | moderate                           | 4 ( 0.3%)              | 3 ( 0.2%)              | 7 ( 0.2%)              |
| Hyperhidrosis                                                       | mild                               | 1 ( <0.1%)             | 1 ( <0.1%)             | 2 ( <0.1%)             |
|                                                                     | moderate                           | 2 ( 0.1%)              | 1 ( <0.1%)             | 3 ( 0.1%)              |
| Hyperkeratosis                                                      | mild                               | 1 ( <0.1%)             | 0                      | 1 ( <0.1%)             |
| Hypertrichosis                                                      | mild                               | 2 ( 0.1%)              | 1 ( <0.1%)             | 3 ( 0.1%)              |
| Idiopathic urticaria                                                | moderate                           | 1 ( <0.1%)             | 0                      | 1 ( <0.1%)             |
| Increased tendency to bruise                                        | mild                               | 1 ( <0.1%)             | 0                      | 1 ( <0.1%)             |
| Ingrown hair                                                        | mild                               | 1 ( <0.1%)             | 0                      | 1 ( <0.1%)             |
| Intertrigo                                                          | mild                               | 1 ( <0.1%)             | 0                      | 1 ( <0.1%)             |
| Lentigo                                                             | mild                               | 1 ( <0.1%)             | 0                      | 1 ( <0.1%)             |
| Lichen sclerosus                                                    | mild                               | 1 ( <0.1%)             | 1 ( <0.1%)             | 2 ( <0.1%)             |
|                                                                     | moderate                           | 0                      | 1 ( <0.1%)             | 1 ( <0.1%)             |
| Neurodermatitis                                                     | mild                               | 0                      | 1 ( <0.1%)             | 1 ( <0.1%)             |
| Night sweats                                                        | moderate                           | 0                      | 1 ( <0.1%)             | 1 ( <0.1%)             |
| Photosensitivity reaction                                           | moderate                           | 0                      | 1 ( <0.1%)             | 1 ( <0.1%)             |

**Table 14.3.1 / 16: Number of subjects with adverse events by maximum intensity, primary system organ class and preferred term (FAS)**

| Primary system organ class<br>Preferred term<br>MedDRA version 14.0 | Maximum AE<br>maximum<br>intensity | LCS12<br>N=1432 (100%) | LCS16<br>N=1452 (100%) | Total<br>N=2884 (100%) |
|---------------------------------------------------------------------|------------------------------------|------------------------|------------------------|------------------------|
| Pityriasis rosea                                                    | mild                               | 1 ( <0.1%)             | 1 ( <0.1%)             | 2 ( <0.1%)             |
|                                                                     | severe                             | 0                      | 1 ( <0.1%)             | 1 ( <0.1%)             |
| Precancerous skin lesion                                            | moderate                           | 0                      | 1 ( <0.1%)             | 1 ( <0.1%)             |
| Pruritus                                                            | mild                               | 2 ( 0.1%)              | 3 ( 0.2%)              | 5 ( 0.2%)              |
|                                                                     | moderate                           | 1 ( <0.1%)             | 0                      | 1 ( <0.1%)             |
|                                                                     | severe                             | 1 ( <0.1%)             | 0                      | 1 ( <0.1%)             |
| Pruritus allergic                                                   | mild                               | 0                      | 2 ( 0.1%)              | 2 ( <0.1%)             |
| Psoriasis                                                           | mild                               | 0                      | 1 ( <0.1%)             | 1 ( <0.1%)             |
|                                                                     | severe                             | 0                      | 1 ( <0.1%)             | 1 ( <0.1%)             |
| Rash                                                                | mild                               | 6 ( 0.4%)              | 4 ( 0.3%)              | 10 ( 0.3%)             |
|                                                                     | moderate                           | 4 ( 0.3%)              | 4 ( 0.3%)              | 8 ( 0.3%)              |
| Rash macular                                                        | mild                               | 0                      | 1 ( <0.1%)             | 1 ( <0.1%)             |
| Rash papular                                                        | mild                               | 1 ( <0.1%)             | 1 ( <0.1%)             | 2 ( <0.1%)             |
|                                                                     | moderate                           | 1 ( <0.1%)             | 0                      | 1 ( <0.1%)             |
| Rosacea                                                             | mild                               | 1 ( <0.1%)             | 1 ( <0.1%)             | 2 ( <0.1%)             |
|                                                                     | severe                             | 0                      | 1 ( <0.1%)             | 1 ( <0.1%)             |
| Scar                                                                | moderate                           | 0                      | 1 ( <0.1%)             | 1 ( <0.1%)             |
| Seborrhoea                                                          | mild                               | 4 ( 0.3%)              | 5 ( 0.3%)              | 9 ( 0.3%)              |
|                                                                     | moderate                           | 3 ( 0.2%)              | 5 ( 0.3%)              | 8 ( 0.3%)              |
| Skin dystrophy                                                      | moderate                           | 1 ( <0.1%)             | 0                      | 1 ( <0.1%)             |
| Skin fissures                                                       | mild                               | 0                      | 2 ( 0.1%)              | 2 ( <0.1%)             |
| Skin hypopigmentation                                               | mild                               | 0                      | 1 ( <0.1%)             | 1 ( <0.1%)             |
| Skin irritation                                                     | mild                               | 1 ( <0.1%)             | 0                      | 1 ( <0.1%)             |
|                                                                     | moderate                           | 0                      | 2 ( 0.1%)              | 2 ( <0.1%)             |

**Table 14.3.1 / 16: Number of subjects with adverse events by maximum intensity, primary system organ class and preferred term (FAS)**

| Primary system organ class<br>Preferred term<br>MedDRA version 14.0 | Maximum AE<br>maximum<br>intensity | LCS12<br>N=1432 (100%) | LCS16<br>N=1452 (100%) | Total<br>N=2884 (100%) |
|---------------------------------------------------------------------|------------------------------------|------------------------|------------------------|------------------------|
| Skin lesion                                                         | mild                               | 0                      | 1 ( <0.1%)             | 1 ( <0.1%)             |
|                                                                     | moderate                           | 0                      | 1 ( <0.1%)             | 1 ( <0.1%)             |
| Skin odour abnormal                                                 | mild                               | 1 ( <0.1%)             | 0                      | 1 ( <0.1%)             |
|                                                                     | severe                             | 1 ( <0.1%)             | 0                      | 1 ( <0.1%)             |
| Skin reaction                                                       | mild                               | 2 ( 0.1%)              | 2 ( 0.1%)              | 4 ( 0.1%)              |
|                                                                     | moderate                           | 9 ( 0.6%)              | 8 ( 0.6%)              | 17 ( 0.6%)             |
| Urticaria                                                           | mild                               | 0                      | 1 ( <0.1%)             | 1 ( <0.1%)             |
|                                                                     | moderate                           | 0                      | 1 ( <0.1%)             | 1 ( <0.1%)             |
| Vitiligo                                                            | mild                               | 1 ( <0.1%)             | 1 ( <0.1%)             | 2 ( <0.1%)             |
|                                                                     | moderate                           | 0                      | 0                      | 0                      |
| Social circumstances                                                | mild                               | 1 ( <0.1%)             | 0                      | 1 ( <0.1%)             |
| Exposure to communicable disease                                    | mild                               | 0                      | 1 ( <0.1%)             | 1 ( <0.1%)             |
| Hearing disability                                                  | mild                               | 0                      | 1 ( <0.1%)             | 1 ( <0.1%)             |
| Surgical and medical procedures                                     | mild                               | 20 ( 1.4%)             | 17 ( 1.2%)             | 37 ( 1.3%)             |
|                                                                     | moderate                           | 14 ( 1.0%)             | 19 ( 1.3%)             | 33 ( 1.1%)             |
|                                                                     | severe                             | 6 ( 0.4%)              | 9 ( 0.6%)              | 15 ( 0.5%)             |
| Abdominoplasty                                                      | mild                               | 3 ( 0.2%)              | 1 ( <0.1%)             | 4 ( 0.1%)              |
|                                                                     | severe                             | 1 ( <0.1%)             | 0                      | 1 ( <0.1%)             |
| Anal fissure excision                                               | severe                             | 1 ( <0.1%)             | 0                      | 1 ( <0.1%)             |
| Anal sphincterotomy                                                 | moderate                           | 0                      | 1 ( <0.1%)             | 1 ( <0.1%)             |
| Apicectomy                                                          | severe                             | 0                      | 1 ( <0.1%)             | 1 ( <0.1%)             |
| Breast prosthesis implantation                                      | mild                               | 1 ( <0.1%)             | 0                      | 1 ( <0.1%)             |
|                                                                     | moderate                           | 1 ( <0.1%)             | 1 ( <0.1%)             | 2 ( <0.1%)             |
|                                                                     | severe                             | 1 ( <0.1%)             | 0                      | 1 ( <0.1%)             |
| Bunion operation                                                    | moderate                           | 2 ( 0.1%)              | 0                      | 2 ( <0.1%)             |
|                                                                     | severe                             | 0                      | 1 ( <0.1%)             | 1 ( <0.1%)             |

**Table 14.3.1 / 16: Number of subjects with adverse events by maximum intensity, primary system organ class and preferred term (FAS)**

| Primary system organ class<br>Preferred term<br>MedDRA version 14.0 | Maximum AE<br>maximum<br>intensity | LCS12<br>N=1432 (100%)      | LCS16<br>N=1452 (100%)       | Total<br>N=2884 (100%)               |
|---------------------------------------------------------------------|------------------------------------|-----------------------------|------------------------------|--------------------------------------|
| Cervix cautery                                                      | moderate                           | 0                           | 1 ( <0.1%)                   | 1 ( <0.1%)                           |
| Cholecystectomy                                                     | severe                             | 1 ( <0.1%)                  | 0                            | 1 ( <0.1%)                           |
| Dental cosmetic procedure                                           | mild                               | 1 ( <0.1%)                  | 0                            | 1 ( <0.1%)                           |
| Dental operation                                                    | mild                               | 1 ( <0.1%)                  | 3 ( 0.2%)                    | 4 ( 0.1%)                            |
| Detoxification                                                      | severe                             | 1 ( <0.1%)                  | 1 ( <0.1%)                   | 2 ( <0.1%)                           |
| Endodontic procedure                                                | mild<br>moderate                   | 0<br>0                      | 1 ( <0.1%)<br>1 ( <0.1%)     | 1 ( <0.1%)<br>1 ( <0.1%)             |
| Eye laser surgery                                                   | mild                               | 0                           | 1 ( <0.1%)                   | 1 ( <0.1%)                           |
| Gallbladder operation                                               | severe                             | 0                           | 1 ( <0.1%)                   | 1 ( <0.1%)                           |
| Gastric banding                                                     | moderate                           | 1 ( <0.1%)                  | 0                            | 1 ( <0.1%)                           |
| Gastric bypass                                                      | mild                               | 0                           | 1 ( <0.1%)                   | 1 ( <0.1%)                           |
| Haemorrhoid operation                                               | mild                               | 0                           | 1 ( <0.1%)                   | 1 ( <0.1%)                           |
| Keratomileusis                                                      | moderate                           | 0                           | 1 ( <0.1%)                   | 1 ( <0.1%)                           |
| Ligament operation                                                  | moderate                           | 1 ( <0.1%)                  | 0                            | 1 ( <0.1%)                           |
| Lipoma excision                                                     | mild                               | 1 ( <0.1%)                  | 0                            | 1 ( <0.1%)                           |
| Mammoplasty                                                         | mild<br>moderate<br>severe         | 4 ( 0.3%)<br>2 ( 0.1%)<br>0 | 0<br>2 ( 0.1%)<br>1 ( <0.1%) | 4 ( 0.1%)<br>4 ( 0.1%)<br>1 ( <0.1%) |
| Maxillary antrum operation                                          | severe                             | 1 ( <0.1%)                  | 0                            | 1 ( <0.1%)                           |
| Meniscus operation                                                  | mild                               | 0                           | 1 ( <0.1%)                   | 1 ( <0.1%)                           |

**Table 14.3.1 / 16: Number of subjects with adverse events by maximum intensity, primary system organ class and preferred term (FAS)**

| Primary system organ class<br>Preferred term<br>MedDRA version 14.0 | Maximum AE<br>maximum<br>intensity | LCS12<br>N=1432 (100%) | LCS16<br>N=1452 (100%) | Total<br>N=2884 (100%) |
|---------------------------------------------------------------------|------------------------------------|------------------------|------------------------|------------------------|
| Mole excision                                                       | mild                               | 1 ( <0.1%)             | 1 ( <0.1%)             | 2 ( <0.1%)             |
|                                                                     | moderate                           | 1 ( <0.1%)             | 1 ( <0.1%)             | 2 ( <0.1%)             |
| Nasal polypectomy                                                   | moderate                           | 0                      | 1 ( <0.1%)             | 1 ( <0.1%)             |
| Parasitic infection prophylaxis                                     | mild                               | 0                      | 1 ( <0.1%)             | 1 ( <0.1%)             |
| Plastic surgery                                                     | mild                               | 0                      | 1 ( <0.1%)             | 1 ( <0.1%)             |
| Postoperative analgesia                                             | moderate                           | 1 ( <0.1%)             | 0                      | 1 ( <0.1%)             |
| Rotator cuff repair                                                 | moderate                           | 0                      | 1 ( <0.1%)             | 1 ( <0.1%)             |
|                                                                     | severe                             | 0                      | 1 ( <0.1%)             | 1 ( <0.1%)             |
| Scar excision                                                       | mild                               | 0                      | 1 ( <0.1%)             | 1 ( <0.1%)             |
| Skin neoplasm excision                                              | severe                             | 0                      | 1 ( <0.1%)             | 1 ( <0.1%)             |
| Tenolysis                                                           | moderate                           | 0                      | 1 ( <0.1%)             | 1 ( <0.1%)             |
| Tonsillectomy                                                       | moderate                           | 1 ( <0.1%)             | 1 ( <0.1%)             | 2 ( <0.1%)             |
|                                                                     | severe                             | 0                      | 1 ( <0.1%)             | 1 ( <0.1%)             |
| Tooth extraction                                                    | mild                               | 3 ( 0.2%)              | 4 ( 0.3%)              | 7 ( 0.2%)              |
|                                                                     | moderate                           | 2 ( 0.1%)              | 4 ( 0.3%)              | 6 ( 0.2%)              |
|                                                                     | severe                             | 1 ( <0.1%)             | 1 ( <0.1%)             | 2 ( <0.1%)             |
| Umbilical hernia repair                                             | mild                               | 0                      | 1 ( <0.1%)             | 1 ( <0.1%)             |
| Varicose vein operation                                             | moderate                           | 1 ( <0.1%)             | 0                      | 1 ( <0.1%)             |
| Wisdom teeth removal                                                | mild                               | 6 ( 0.4%)              | 1 ( <0.1%)             | 7 ( 0.2%)              |
|                                                                     | moderate                           | 1 ( <0.1%)             | 4 ( 0.3%)              | 5 ( 0.2%)              |
| Wrist surgery                                                       | moderate                           | 0                      | 1 ( <0.1%)             | 1 ( <0.1%)             |



**Table 14.3.1 / 16: Number of subjects with adverse events by maximum intensity, primary system organ class and preferred term (FAS)**

| Primary system organ class<br>Preferred term<br>MedDRA version 14.0 | Maximum AE<br>maximum<br>intensity | LCS12<br>N=1432 (100%) | LCS16<br>N=1452 (100%) | Total<br>N=2884 (100%) |
|---------------------------------------------------------------------|------------------------------------|------------------------|------------------------|------------------------|
| Vascular disorders                                                  | mild                               | 7 ( 0.5%)              | 15 ( 1.0%)             | 22 ( 0.8%)             |
|                                                                     | moderate                           | 10 ( 0.7%)             | 9 ( 0.6%)              | 19 ( 0.7%)             |
|                                                                     | severe                             | 3 ( 0.2%)              | 2 ( 0.1%)              | 5 ( 0.2%)              |
| Deep vein thrombosis                                                | severe                             | 1 ( <0.1%)             | 0                      | 1 ( <0.1%)             |
| Hot flush                                                           | mild                               | 1 ( <0.1%)             | 1 ( <0.1%)             | 2 ( <0.1%)             |
|                                                                     | moderate                           | 3 ( 0.2%)              | 2 ( 0.1%)              | 5 ( 0.2%)              |
| Hypertension                                                        | mild                               | 6 ( 0.4%)              | 13 ( 0.9%)             | 19 ( 0.7%)             |
|                                                                     | moderate                           | 3 ( 0.2%)              | 3 ( 0.2%)              | 6 ( 0.2%)              |
|                                                                     | severe                             | 2 ( 0.1%)              | 0                      | 2 ( <0.1%)             |
| Hypotension                                                         | mild                               | 0                      | 1 ( <0.1%)             | 1 ( <0.1%)             |
|                                                                     | moderate                           | 1 ( <0.1%)             | 0                      | 1 ( <0.1%)             |
|                                                                     | severe                             | 0                      | 1 ( <0.1%)             | 1 ( <0.1%)             |
| Neurogenic shock                                                    | moderate                           | 2 ( 0.1%)              | 0                      | 2 ( <0.1%)             |
| Phlebitis                                                           | moderate                           | 0                      | 1 ( <0.1%)             | 1 ( <0.1%)             |
| Thrombophlebitis superficial                                        | mild                               | 1 ( <0.1%)             | 0                      | 1 ( <0.1%)             |
| Varicose vein                                                       | mild                               | 0                      | 1 ( <0.1%)             | 1 ( <0.1%)             |
|                                                                     | moderate                           | 1 ( <0.1%)             | 3 ( 0.2%)              | 4 ( 0.1%)              |
|                                                                     | severe                             | 0                      | 1 ( <0.1%)             | 1 ( <0.1%)             |
| Vein pain                                                           | moderate                           | 0                      | 1 ( <0.1%)             | 1 ( <0.1%)             |

Note: A subject is counted only once within each preferred term of any primary SOC.

Note: Adverse events are sorted in alphabetical order by primary SOC and preferred term.

Note: Only the most severe intensity is counted for multiple occurrences of the same AE in one individual.

Note: laboratory AEs are not covered by this table as no intensity could be given on CRF

Global Biostatistics: /by-sasp/patdb/projects/de04209/310442/stat/prod\_interim03/pgms/t-ae.sas epkll 12OCT2011 11:24

End of table

**Table 14.3.1 / 17: Number of subjects with serious adverse events by primary system organ class and preferred term (FAS)**

| Primary system organ class<br>Preferred term<br>MedDRA version 14.0 | LCS12<br>N=1432 (100%) | LCS16<br>N=1452 (100%) | Total<br>N=2884 (100%) |
|---------------------------------------------------------------------|------------------------|------------------------|------------------------|
| Number of subjects (%) with at least one SAE                        | 66 ( 4.6%)             | 71 ( 4.9%)             | 137 ( 4.8%)            |
| Blood and lymphatic system disorders                                | 1 ( <0.1%)             | 0                      | 1 ( <0.1%)             |
| Spherocytic anaemia                                                 | 1 ( <0.1%)             | 0                      | 1 ( <0.1%)             |
| Splenomegaly                                                        | 1 ( <0.1%)             | 0                      | 1 ( <0.1%)             |
| Cardiac disorders                                                   | 0                      | 1 ( <0.1%)             | 1 ( <0.1%)             |
| Mitral valve prolapse                                               | 0                      | 1 ( <0.1%)             | 1 ( <0.1%)             |
| Sinus tachycardia                                                   | 0                      | 1 ( <0.1%)             | 1 ( <0.1%)             |
| Ear and labyrinth disorders                                         | 0                      | 1 ( <0.1%)             | 1 ( <0.1%)             |
| Vertigo                                                             | 0                      | 1 ( <0.1%)             | 1 ( <0.1%)             |
| Endocrine disorders                                                 | 1 ( <0.1%)             | 1 ( <0.1%)             | 2 ( <0.1%)             |
| Goitre                                                              | 1 ( <0.1%)             | 1 ( <0.1%)             | 2 ( <0.1%)             |
| Eye disorders                                                       | 1 ( <0.1%)             | 0                      | 1 ( <0.1%)             |
| Iridocyclitis                                                       | 1 ( <0.1%)             | 0                      | 1 ( <0.1%)             |
| Gastrointestinal disorders                                          | 9 ( 0.6%)              | 9 ( 0.6%)              | 18 ( 0.6%)             |
| Abdominal adhesions                                                 | 1 ( <0.1%)             | 0                      | 1 ( <0.1%)             |
| Abdominal hernia                                                    | 1 ( <0.1%)             | 0                      | 1 ( <0.1%)             |
| Abdominal pain                                                      | 5 ( 0.3%)              | 4 ( 0.3%)              | 9 ( 0.3%)              |
| Constipation                                                        | 1 ( <0.1%)             | 0                      | 1 ( <0.1%)             |
| Crohn's disease                                                     | 1 ( <0.1%)             | 0                      | 1 ( <0.1%)             |
| Dysphagia                                                           | 0                      | 1 ( <0.1%)             | 1 ( <0.1%)             |
| Gastritis                                                           | 0                      | 1 ( <0.1%)             | 1 ( <0.1%)             |
| Impaired gastric emptying                                           | 1 ( <0.1%)             | 0                      | 1 ( <0.1%)             |
| Irritable bowel syndrome                                            | 1 ( <0.1%)             | 0                      | 1 ( <0.1%)             |
| Odynophagia                                                         | 0                      | 1 ( <0.1%)             | 1 ( <0.1%)             |
| Peritonitis                                                         | 1 ( <0.1%)             | 0                      | 1 ( <0.1%)             |
| Rectal haemorrhage                                                  | 0                      | 1 ( <0.1%)             | 1 ( <0.1%)             |
| Salivary gland calculus                                             | 0                      | 1 ( <0.1%)             | 1 ( <0.1%)             |
| Umbilical hernia                                                    | 0                      | 1 ( <0.1%)             | 1 ( <0.1%)             |
| General disorders and administration site conditions                | 2 ( 0.1%)              | 1 ( <0.1%)             | 3 ( 0.1%)              |
| Chest pain                                                          | 1 ( <0.1%)             | 0                      | 1 ( <0.1%)             |
| Device dislocation                                                  | 0                      | 1 ( <0.1%)             | 1 ( <0.1%)             |
| Pyrexia                                                             | 1 ( <0.1%)             | 0                      | 1 ( <0.1%)             |

**Table 14.3.1 / 17: Number of subjects with serious adverse events by primary system organ class and preferred term (FAS)**

| Primary system organ class         | LCS12         | LCS16         | Total         |
|------------------------------------|---------------|---------------|---------------|
| Preferred term                     |               |               |               |
| MedDRA version 14.0                | N=1432 (100%) | N=1452 (100%) | N=2884 (100%) |
| Hepatobiliary disorders            | 4 ( 0.3%)     | 3 ( 0.2%)     | 7 ( 0.2%)     |
| Cholecystitis                      | 2 ( 0.1%)     | 2 ( 0.1%)     | 4 ( 0.1%)     |
| Cholecystitis chronic              | 1 (<0.1%)     | 0             | 1 (<0.1%)     |
| Cholelithiasis                     | 1 (<0.1%)     | 2 ( 0.1%)     | 3 ( 0.1%)     |
| Gallbladder polyp                  | 1 (<0.1%)     | 0             | 1 (<0.1%)     |
| Immune system disorders            | 1 (<0.1%)     | 1 (<0.1%)     | 2 (<0.1%)     |
| Anaphylactic reaction              | 0             | 1 (<0.1%)     | 1 (<0.1%)     |
| Drug hypersensitivity              | 1 (<0.1%)     | 0             | 1 (<0.1%)     |
| Infections and infestations        | 24 ( 1.7%)    | 20 ( 1.4%)    | 44 ( 1.5%)    |
| Appendicitis                       | 6 ( 0.4%)     | 7 ( 0.5%)     | 13 ( 0.5%)    |
| Campylobacter intestinal infection | 0             | 1 (<0.1%)     | 1 (<0.1%)     |
| Cellulitis                         | 1 (<0.1%)     | 1 (<0.1%)     | 2 (<0.1%)     |
| Cystitis                           | 1 (<0.1%)     | 0             | 1 (<0.1%)     |
| Diverticulitis                     | 1 (<0.1%)     | 0             | 1 (<0.1%)     |
| Enterocolitis infectious           | 1 (<0.1%)     | 0             | 1 (<0.1%)     |
| Gastroenteritis                    | 1 (<0.1%)     | 0             | 1 (<0.1%)     |
| Genital herpes                     | 1 (<0.1%)     | 0             | 1 (<0.1%)     |
| Herpes dermatitis                  | 1 (<0.1%)     | 0             | 1 (<0.1%)     |
| Infection                          | 0             | 1 (<0.1%)     | 1 (<0.1%)     |
| Meningitis                         | 1 (<0.1%)     | 0             | 1 (<0.1%)     |
| Meningitis viral                   | 0             | 1 (<0.1%)     | 1 (<0.1%)     |
| Pelvic inflammatory disease        | 2 ( 0.1%)     | 4 ( 0.3%)     | 6 ( 0.2%)     |
| Peritoneal abscess                 | 1 (<0.1%)     | 0             | 1 (<0.1%)     |
| Peritonsillar abscess              | 1 (<0.1%)     | 1 (<0.1%)     | 2 (<0.1%)     |
| Pneumonia                          | 2 ( 0.1%)     | 1 (<0.1%)     | 3 ( 0.1%)     |
| Pyelonephritis                     | 1 (<0.1%)     | 1 (<0.1%)     | 2 (<0.1%)     |
| Pyelonephritis acute               | 1 (<0.1%)     | 0             | 1 (<0.1%)     |
| Sinusitis                          | 0             | 1 (<0.1%)     | 1 (<0.1%)     |
| Streptococcal sepsis               | 1 (<0.1%)     | 0             | 1 (<0.1%)     |
| Tonsillitis                        | 1 (<0.1%)     | 0             | 1 (<0.1%)     |
| Tubo-ovarian abscess               | 1 (<0.1%)     | 0             | 1 (<0.1%)     |
| Upper respiratory tract infection  | 1 (<0.1%)     | 0             | 1 (<0.1%)     |
| Urinary tract infection            | 2 ( 0.1%)     | 0             | 2 (<0.1%)     |
| Vestibular neuronitis              | 1 (<0.1%)     | 0             | 1 (<0.1%)     |
| Viral infection                    | 0             | 1 (<0.1%)     | 1 (<0.1%)     |

**Table 14.3.1 / 17: Number of subjects with serious adverse events by primary system organ class and preferred term (FAS)**

| Primary system organ class                                          | LCS12         | LCS16         | Total         |
|---------------------------------------------------------------------|---------------|---------------|---------------|
| Preferred term                                                      | N=1432 (100%) | N=1452 (100%) | N=2884 (100%) |
| MedDRA version 14.0                                                 |               |               |               |
| Injury, poisoning and procedural complications                      | 5 ( 0.3%)     | 6 ( 0.4%)     | 11 ( 0.4%)    |
| Ankle fracture                                                      | 0             | 1 (<0.1%)     | 1 (<0.1%)     |
| Foot fracture                                                       | 0             | 1 (<0.1%)     | 1 (<0.1%)     |
| Forearm fracture                                                    | 1 (<0.1%)     | 0             | 1 (<0.1%)     |
| Joint sprain                                                        | 1 (<0.1%)     | 0             | 1 (<0.1%)     |
| Meniscus lesion                                                     | 1 (<0.1%)     | 0             | 1 (<0.1%)     |
| Overdose                                                            | 1 (<0.1%)     | 0             | 1 (<0.1%)     |
| Procedural pain                                                     | 0             | 2 ( 0.1%)     | 2 (<0.1%)     |
| Subdural haematoma                                                  | 1 (<0.1%)     | 0             | 1 (<0.1%)     |
| Tendon rupture                                                      | 0             | 1 (<0.1%)     | 1 (<0.1%)     |
| Thermal burn                                                        | 0             | 1 (<0.1%)     | 1 (<0.1%)     |
| Investigations                                                      | 1 (<0.1%)     | 1 (<0.1%)     | 2 (<0.1%)     |
| Haemoglobin decreased                                               | 0             | 1 (<0.1%)     | 1 (<0.1%)     |
| Weight increased                                                    | 1 (<0.1%)     | 0             | 1 (<0.1%)     |
| Metabolism and nutrition disorders                                  | 0             | 1 (<0.1%)     | 1 (<0.1%)     |
| Diabetic ketoacidosis                                               | 0             | 1 (<0.1%)     | 1 (<0.1%)     |
| Musculoskeletal and connective tissue disorders                     | 1 (<0.1%)     | 4 ( 0.3%)     | 5 ( 0.2%)     |
| Arthritis                                                           | 0             | 1 (<0.1%)     | 1 (<0.1%)     |
| Axillary mass                                                       | 0             | 1 (<0.1%)     | 1 (<0.1%)     |
| Joint instability                                                   | 0             | 1 (<0.1%)     | 1 (<0.1%)     |
| Loose body in joint                                                 | 0             | 1 (<0.1%)     | 1 (<0.1%)     |
| Synovitis                                                           | 1 (<0.1%)     | 0             | 1 (<0.1%)     |
| Neoplasms benign, malignant and unspecified (incl cysts and polyps) | 7 ( 0.5%)     | 5 ( 0.3%)     | 12 ( 0.4%)    |
| Acute leukaemia                                                     | 1 (<0.1%)     | 0             | 1 (<0.1%)     |
| Astrocytoma, low grade                                              | 1 (<0.1%)     | 0             | 1 (<0.1%)     |
| Cervix carcinoma stage 0                                            | 0             | 1 (<0.1%)     | 1 (<0.1%)     |
| Ovarian germ cell teratoma benign                                   | 2 ( 0.1%)     | 2 ( 0.1%)     | 4 ( 0.1%)     |
| Pancreatic carcinoma                                                | 0             | 1 (<0.1%)     | 1 (<0.1%)     |
| Teratoma benign                                                     | 0             | 1 (<0.1%)     | 1 (<0.1%)     |
| Thyroid cancer                                                      | 2 ( 0.1%)     | 0             | 2 (<0.1%)     |
| Uterine leiomyoma                                                   | 1 (<0.1%)     | 0             | 1 (<0.1%)     |

**Table 14.3.1 / 17: Number of subjects with serious adverse events by primary system organ class and preferred term (FAS)**

| Primary system organ class<br>Preferred term<br>MedDRA version 14.0 | LCS12<br>N=1432 (100%) | LCS16<br>N=1452 (100%) | Total<br>N=2884 (100%) |
|---------------------------------------------------------------------|------------------------|------------------------|------------------------|
| <b>Nervous system disorders</b>                                     | 1 ( <0.1%)             | 5 ( 0.3%)              | 6 ( 0.2%)              |
| Convulsion                                                          | 0                      | 1 ( <0.1%)             | 1 ( <0.1%)             |
| Dizziness                                                           | 0                      | 2 ( 0.1%)              | 2 ( <0.1%)             |
| Headache                                                            | 0                      | 1 ( <0.1%)             | 1 ( <0.1%)             |
| Paraesthesia                                                        | 0                      | 1 ( <0.1%)             | 1 ( <0.1%)             |
| Sciatica                                                            | 0                      | 1 ( <0.1%)             | 1 ( <0.1%)             |
| Status migrainosus                                                  | 1 ( <0.1%)             | 0                      | 1 ( <0.1%)             |
| <b>Pregnancy, puerperium and perinatal conditions</b>               | 6 ( 0.4%)              | 9 ( 0.6%)              | 15 ( 0.5%)             |
| Abortion spontaneous                                                | 3 ( 0.2%)              | 0                      | 3 ( 0.1%)              |
| Abortion spontaneous incomplete                                     | 0                      | 1 ( <0.1%)             | 1 ( <0.1%)             |
| Blighted ovum                                                       | 0                      | 1 ( <0.1%)             | 1 ( <0.1%)             |
| Ectopic pregnancy                                                   | 3 ( 0.2%)              | 6 ( 0.4%)              | 9 ( 0.3%)              |
| Premature separation of placenta                                    | 1 ( <0.1%)             | 0                      | 1 ( <0.1%)             |
| Ruptured ectopic pregnancy                                          | 0                      | 1 ( <0.1%)             | 1 ( <0.1%)             |
| <b>Psychiatric disorders</b>                                        | 3 ( 0.2%)              | 5 ( 0.3%)              | 8 ( 0.3%)              |
| Affective disorder                                                  | 0                      | 1 ( <0.1%)             | 1 ( <0.1%)             |
| Alcoholism                                                          | 0                      | 1 ( <0.1%)             | 1 ( <0.1%)             |
| Anxiety                                                             | 1 ( <0.1%)             | 1 ( <0.1%)             | 2 ( <0.1%)             |
| Bipolar disorder                                                    | 0                      | 1 ( <0.1%)             | 1 ( <0.1%)             |
| Completed suicide                                                   | 0                      | 1 ( <0.1%)             | 1 ( <0.1%)             |
| Depression                                                          | 1 ( <0.1%)             | 1 ( <0.1%)             | 2 ( <0.1%)             |
| Depression suicidal                                                 | 1 ( <0.1%)             | 0                      | 1 ( <0.1%)             |
| Drug dependence                                                     | 0                      | 1 ( <0.1%)             | 1 ( <0.1%)             |
| Hallucination, auditory                                             | 1 ( <0.1%)             | 0                      | 1 ( <0.1%)             |
| Panic disorder                                                      | 0                      | 1 ( <0.1%)             | 1 ( <0.1%)             |
| Polysubstance dependence                                            | 0                      | 1 ( <0.1%)             | 1 ( <0.1%)             |
| Suicide attempt                                                     | 1 ( <0.1%)             | 0                      | 1 ( <0.1%)             |
| <b>Renal and urinary disorders</b>                                  | 3 ( 0.2%)              | 0                      | 3 ( 0.1%)              |
| Haematuria                                                          | 1 ( <0.1%)             | 0                      | 1 ( <0.1%)             |
| Strangury                                                           | 1 ( <0.1%)             | 0                      | 1 ( <0.1%)             |
| Stress urinary incontinence                                         | 1 ( <0.1%)             | 0                      | 1 ( <0.1%)             |

**Table 14.3.1 / 17: Number of subjects with serious adverse events by primary system organ class and preferred term (FAS)**

| Primary system organ class<br>Preferred term<br>MedDRA version 14.0 | LCS12<br>N=1432 (100%) | LCS16<br>N=1452 (100%) | Total<br>N=2884 (100%) |
|---------------------------------------------------------------------|------------------------|------------------------|------------------------|
| Reproductive system and breast disorders                            | 7 ( 0.5%)              | 5 ( 0.3%)              | 12 ( 0.4%)             |
| Endometriosis                                                       | 1 (<0.1%)              | 0                      | 1 (<0.1%)              |
| Haemorrhagic ovarian cyst                                           | 2 ( 0.1%)              | 0                      | 2 (<0.1%)              |
| Ovarian cyst                                                        | 1 (<0.1%)              | 2 ( 0.1%)              | 3 ( 0.1%)              |
| Ovarian cyst ruptured                                               | 1 (<0.1%)              | 1 (<0.1%)              | 2 (<0.1%)              |
| Ovarian cyst torsion                                                | 0                      | 1 (<0.1%)              | 1 (<0.1%)              |
| Pelvic adhesions                                                    | 0                      | 1 (<0.1%)              | 1 (<0.1%)              |
| Uterine prolapse                                                    | 1 (<0.1%)              | 0                      | 1 (<0.1%)              |
| Uterine spasm                                                       | 1 (<0.1%)              | 0                      | 1 (<0.1%)              |
| Vaginal perforation                                                 | 0                      | 1 (<0.1%)              | 1 (<0.1%)              |
| Respiratory, thoracic and mediastinal disorders                     | 2 ( 0.1%)              | 1 (<0.1%)              | 3 ( 0.1%)              |
| Asthma                                                              | 1 (<0.1%)              | 1 (<0.1%)              | 2 (<0.1%)              |
| Dyspnoea                                                            | 0                      | 1 (<0.1%)              | 1 (<0.1%)              |
| Hypoxia                                                             | 0                      | 1 (<0.1%)              | 1 (<0.1%)              |
| Pneumothorax                                                        | 1 (<0.1%)              | 0                      | 1 (<0.1%)              |
| Skin and subcutaneous tissue disorders                              | 1 (<0.1%)              | 1 (<0.1%)              | 2 (<0.1%)              |
| Erythema multiforme                                                 | 1 (<0.1%)              | 0                      | 1 (<0.1%)              |
| Urticaria                                                           | 0                      | 1 (<0.1%)              | 1 (<0.1%)              |
| Surgical and medical procedures                                     | 1 (<0.1%)              | 1 (<0.1%)              | 2 (<0.1%)              |
| Detoxification                                                      | 1 (<0.1%)              | 1 (<0.1%)              | 2 (<0.1%)              |
| Vascular disorders                                                  | 2 ( 0.1%)              | 0                      | 2 (<0.1%)              |
| Deep vein thrombosis                                                | 1 (<0.1%)              | 0                      | 1 (<0.1%)              |
| Hypertension                                                        | 1 (<0.1%)              | 0                      | 1 (<0.1%)              |

Note: A subject is counted only once within each preferred term of any primary SOC.

Note: Adverse events are sorted in alphabetical order by primary SOC and preferred term.

Global Biostatistics: /by-sasp/patdb/projects/de04209/310442/stat/prod\_interim03/pgms/t-ae.sas epkll 12OCT2011 11:24

End of table

**Table 14.3.1 / 18: Number of subjects with study drug-related serious adverse events by primary system organ class and preferred term (FAS)**

| Primary system organ class<br>Preferred term<br>MedDRA version 14.0 | LCS12<br>N=1432 (100%) | LCS16<br>N=1452 (100%) | Total<br>N=2884 (100%) |
|---------------------------------------------------------------------|------------------------|------------------------|------------------------|
| Number of subjects (%) with at least one SAE                        | 8 ( 0.6%)              | 15 ( 1.0%)             | 23 ( 0.8%)             |
| Gastrointestinal disorders                                          | 1 ( <0.1%)             | 2 ( 0.1%)              | 3 ( 0.1%)              |
| Abdominal pain                                                      | 1 ( <0.1%)             | 2 ( 0.1%)              | 3 ( 0.1%)              |
| General disorders and administration site conditions                | 0                      | 1 ( <0.1%)             | 1 ( <0.1%)             |
| Device dislocation                                                  | 0                      | 1 ( <0.1%)             | 1 ( <0.1%)             |
| Infections and infestations                                         | 2 ( 0.1%)              | 4 ( 0.3%)              | 6 ( 0.2%)              |
| Pelvic inflammatory disease                                         | 2 ( 0.1%)              | 4 ( 0.3%)              | 6 ( 0.2%)              |
| Tubo-ovarian abscess                                                | 1 ( <0.1%)             | 0                      | 1 ( <0.1%)             |
| Pregnancy, puerperium and perinatal conditions                      | 3 ( 0.2%)              | 8 ( 0.6%)              | 11 ( 0.4%)             |
| Abortion spontaneous                                                | 1 ( <0.1%)             | 0                      | 1 ( <0.1%)             |
| Abortion spontaneous incomplete                                     | 0                      | 1 ( <0.1%)             | 1 ( <0.1%)             |
| Ectopic pregnancy                                                   | 2 ( 0.1%)              | 6 ( 0.4%)              | 8 ( 0.3%)              |
| Premature separation of placenta                                    | 1 ( <0.1%)             | 0                      | 1 ( <0.1%)             |
| Ruptured ectopic pregnancy                                          | 0                      | 1 ( <0.1%)             | 1 ( <0.1%)             |
| Reproductive system and breast disorders                            | 2 ( 0.1%)              | 1 ( <0.1%)             | 3 ( 0.1%)              |
| Haemorrhagic ovarian cyst                                           | 1 ( <0.1%)             | 0                      | 1 ( <0.1%)             |
| Ovarian cyst                                                        | 0                      | 1 ( <0.1%)             | 1 ( <0.1%)             |
| Ovarian cyst ruptured                                               | 1 ( <0.1%)             | 0                      | 1 ( <0.1%)             |

Note: A subject is counted only once within each preferred term of any primary SOC.

Note: Adverse events are sorted in alphabetical order by primary SOC and preferred term.

Global Biostatistics: /by-sasp/patdb/projects/de04209/310442/stat/prod\_interim03/pgms/t-ae.sas epkll 12OCT2011 11:24

End of table

### **14.3.2 Listings of deaths, other serious and significant adverse events**



**Table 14.3.2 / 1: Deaths - Subjects listing (FAS)**

| TREATME<br>NT | Subject/age/sex/race           | IUS<br>insertion<br>date | Last day on<br>study<br>medication<br>(imputed) | Death date<br>text | Relative to<br>start<br>day/relativ<br>e to stop<br>day | Caus<br>e of<br>death<br>AE<br>text | MedDRA preferred term<br>with fatal outcome | AE study<br>drug<br>relation | Cause of death text           |
|---------------|--------------------------------|--------------------------|-------------------------------------------------|--------------------|---------------------------------------------------------|-------------------------------------|---------------------------------------------|------------------------------|-------------------------------|
| LCS16         | 210112/<br>20/female/Caucasian | 11JAN08                  | 15JUL10                                         | JUL2010            |                                                         |                                     | Completed suicide                           | no                           | REASONS<br>UNKNOWN<br>SUCIDE. |

Note: Relative to start day = date of death minus date of first study drug administration plus 1 day.

Relative to stop day = date of death minus date of last study drug administration plus 1 day.

Note: Dictionary/ MedDRA Version 14.0

Global Biostatistics: /by-sasp/patdb/projects/de04209/310442/stat/prod\_interim03/pgms/t-sae.sas epkl 12OCT2011 11:27

End of table

**Table 14.3.2 / 2: Serious adverse events - Subject listing (FAS)**

TREATMENT: LCS12

| Subject/<br>age/sex/r<br>ace           | Primary<br>SOC/preferred<br>term/AEX                                                               | AE<br>maximum<br>intensity | Related to study<br>drug/protocol-required<br>procedure | Onset date/stop<br>date/study day | AE<br>Duration<br>(days) | AE related study<br>drug action | AE related<br>drug<br>treatment/non<br>-drug<br>treatment | AE outcome             |
|----------------------------------------|----------------------------------------------------------------------------------------------------|----------------------------|---------------------------------------------------------|-----------------------------------|--------------------------|---------------------------------|-----------------------------------------------------------|------------------------|
| 120330/<br>21/femal<br>e/other         | Gastrointestinal<br>disorders/Peritoniti<br>s/PERITONITIS                                          | severe                     | NO/NO                                                   | 11SEP2009/15SEP2009/<br>519       | 5                        | dose not changed                | YES/YES                                                   | recovered/<br>resolved |
|                                        | Infections and<br>infestations/Appen<br>dicitis/[ACUTE<br>APENDICITIS]                             | severe                     | NO/NO                                                   | 11SEP2009/15SEP2009/<br>519       | 5                        | dose not changed                | YES/YES                                                   | recovered/<br>resolved |
|                                        | Infections and<br>infestations/Urinar<br>y tract<br>infection/URINAR<br>Y INFECTION                | severe                     | NO/NO                                                   | 16SEP2009/20SEP2009/<br>524       | 5                        | dose not changed                | YES/NO                                                    | recovered/<br>resolved |
| 120419/<br>30/femal<br>e/Caucas<br>ian | Pregnancy,<br>puerperium and<br>perinatal<br>conditions/Ectopic<br>pregnancy/ECTOP<br>IC PREGNANCY | severe                     | YES/NO                                                  | 27JAN2009/02FEB2009<br>/<br>259   | 7                        | drug withdrawn                  | NO/YES                                                    | recovered/<br>resolved |
| 140114/<br>32/femal<br>e/Caucas<br>ian | Psychiatric<br>disorders/Hallucina<br>tion,<br>auditory/AUDITIV<br>E<br>HALLUCINATIO<br>NS         | moderate                   | NO/NO                                                   | 10APR2009/27APR200<br>9/<br>347   | 18                       | dose not changed                | YES/NO                                                    | recovered/<br>resolved |
| 140118/<br>24/femal<br>e/Caucas<br>ian | Infections and<br>infestations/Cystiti<br>s/CYSTITIS                                               | severe                     | NO/NO                                                   | 13JUL2008/14JUL2008/<br>55        | 2                        | dose not changed                | YES/NO                                                    | recovered/<br>resolved |

**Table 14.3.2 / 2: Serious adverse events - Subject listing (FAS)**

TREATMENT: LCS12

| Subject/<br>age/sex/r<br>ace           | Primary<br>SOC/preferred<br>term/AEX                                                                            | AE<br>maximum<br>intensity | Related to study<br>drug/protocol-required<br>procedure | Onset date/stop<br>date/study day | AE<br>Duration<br>(days) | AE related study<br>drug action | AE related<br>drug<br>treatment/non<br>-drug<br>treatment | AE outcome                                    |
|----------------------------------------|-----------------------------------------------------------------------------------------------------------------|----------------------------|---------------------------------------------------------|-----------------------------------|--------------------------|---------------------------------|-----------------------------------------------------------|-----------------------------------------------|
| 140202/<br>27/femal<br>e/Caucas<br>ian | Pregnancy,<br>puerperium and<br>perinatal<br>conditions/Abortio<br>n<br>spontaneous/SPON<br>TANEOUS<br>ABORTION | mild                       | NO/NO                                                   | 08SEP2010/08SEP2010/<br>932       | 1                        | drug withdrawn                  | NO/NO                                                     | recovered/<br>resolved                        |
| 140520/<br>30/femal<br>e/Caucas<br>ian | Injury, poisoning<br>and procedural<br>complications/Fore<br>arm fracture/LEFT<br>LOWER ARM<br>FRACTURE         | severe                     | NO/NO                                                   | 28JUN2008/24NOV200<br>8/ 53       | 150                      | dose not changed                | YES/YES                                                   | recovered/<br>resolved with<br>resid. effects |
| 140807/<br>33/femal<br>e/Caucas<br>ian | Vascular<br>disorders/Deep<br>vein<br>thrombosis/LEFT<br>LEG DEEP VEIN<br>THROMBOSIS                            | severe                     | NO/NO                                                   | 14NOV2008/28NOV20<br>08/ 201      | 15                       | drug withdrawn                  | YES/NO                                                    | recovered/<br>resolved                        |
| 150111/<br>30/femal<br>e/Caucas<br>ian | Infections and<br>infestations/Appen<br>dicitis/ACUTE<br>APPENDICITIS                                           | severe                     | NO/NO                                                   | 21MAR2008/22MAR20<br>08/ 45       | 2                        | dose not changed                | YES/YES                                                   | recovered/<br>resolved                        |
| 150123/<br>22/femal<br>e/Caucas<br>ian | Infections and<br>infestations/Tonsill<br>itis/TONSILLITIS                                                      | moderate                   | NO/NO                                                   | 23MAY2008/11JUN200<br>8/ 115      | 20                       | dose not changed                | YES/YES                                                   | recovered/<br>resolved                        |

**Table 14.3.2 / 2: Serious adverse events - Subject listing (FAS)**

TREATMENT: LCS12

| Subject/<br>age/sex/r<br>ace           | Primary<br>SOC/preferred<br>term/AEX                                                                                                                     | AE<br>maximum<br>intensity | Related to study<br>drug/protocol-required<br>procedure | Onset date/stop<br>date/study day | AE<br>Duration<br>(days) | AE related study<br>drug action | AE related<br>drug<br>treatment/non<br>-drug<br>treatment | AE outcome             |
|----------------------------------------|----------------------------------------------------------------------------------------------------------------------------------------------------------|----------------------------|---------------------------------------------------------|-----------------------------------|--------------------------|---------------------------------|-----------------------------------------------------------|------------------------|
| 150138/<br>33/femal<br>e/Caucas<br>ian | Gastrointestinal<br>disorders/Irritable<br>bowel<br>syndrome/IRRITA<br>BLE COLON<br>CRISIS                                                               | severe                     | NO/NO                                                   | 21NOV2009/24NOV20<br>09/ 656      | 4                        | dose not changed                | YES/NO                                                    | recovered/<br>resolved |
| 160317/<br>26/femal<br>e/Caucas<br>ian | Neoplasms benign,<br>malignant and<br>unspecified (incl<br>cysts and<br>polyps)/Ovarian<br>germ cell teratoma<br>benign/DERMOID<br>CYST (RIGHT<br>OVARY) | moderate                   | NO/NO                                                   | 16AUG2010/25OCT201<br>0/ 939      | 71                       | dose not changed                | YES/YES                                                   | recovered/<br>resolved |
| 160329/<br>21/femal<br>e/Caucas<br>ian | Infections and<br>infestations/Menin<br>gitis/MENINGITIS<br>POST<br>OPERATIVE                                                                            | moderate                   | NO/NO                                                   | 25MAR2008/15APR200<br>8/ 51       | 22                       | dose not changed                | YES/NO                                                    | recovered/<br>resolved |
|                                        | Injury, poisoning<br>and procedural<br>complications/Sub<br>dural<br>haematoma/HEMA<br>TOMA<br>SUBDURALE<br>POSTOPERATIV<br>E                            | severe                     | NO/NO                                                   | 19MAR2008/15APR200<br>8/ 45       | 28                       | dose not changed                | NO/YES                                                    | recovered/<br>resolved |

**Table 14.3.2 / 2: Serious adverse events - Subject listing (FAS)**

TREATMENT: LCS12

| Subject/<br>age/sex/r<br>ace           | Primary<br>SOC/preferred<br>term/AEX                                                                                                           | AE<br>maximum<br>intensity | Related to study<br>drug/protocol-required<br>procedure | Onset date/stop<br>date/study day | AE<br>Duration<br>(days) | AE related study<br>drug action | AE related<br>drug<br>treatment/non<br>-drug<br>treatment | AE outcome                                    |
|----------------------------------------|------------------------------------------------------------------------------------------------------------------------------------------------|----------------------------|---------------------------------------------------------|-----------------------------------|--------------------------|---------------------------------|-----------------------------------------------------------|-----------------------------------------------|
|                                        | Neoplasms benign,<br>malignant and<br>unspecified (incl<br>cysts and<br>polyps)/Astrocyto<br>ma, low<br>grade/PILOCYTIC<br>ASTROCYTOMA<br>GR 1 | severe                     | NO/NO                                                   | 13MAR2008/15APR200<br>8/ 39       | 34                       | dose not changed                | YES/YES                                                   | recovered/<br>resolved                        |
| 160416/<br>26/femal<br>e/Caucas<br>ian | Infections and<br>infestations/Appen<br>dicitis/APPENDIC<br>ITIS                                                                               | moderate                   | NO/NO                                                   | 27AUG2008/10SEP200<br>8/ 293      | 15                       | dose not changed                | YES/YES                                                   | recovered/<br>resolved                        |
| 160427/<br>29/femal<br>e/Caucas<br>ian | Gastrointestinal<br>disorders/Abdomin<br>al pain/DOLORES<br>ABDOMINI<br>NUD=ABDOMIN<br>AL PAIN                                                 | moderate                   | NO/NO                                                   | 04JAN2010/05JAN2010<br>/ 725      | 2                        | dose not changed                | YES/YES                                                   | recovered/<br>resolved                        |
| 160519/<br>31/femal<br>e/Caucas<br>ian | Neoplasms benign,<br>malignant and<br>unspecified (incl<br>cysts and<br>polyps)/Thyroid<br>cancer/CARSINO<br>MA (CANCER)<br>THYROIDEA          | severe                     | NO/NO                                                   | 13SEP2010/16SEP2010/<br>1079      | 4                        | dose not changed                | YES/YES                                                   | recovered/<br>resolved with<br>resid. effects |
| 160576/<br>31/femal<br>e/Caucas<br>ian | Respiratory,<br>thoracic and<br>mediastinal<br>disorders/Asthma/<br>WORSENING OF<br>ASTHMA                                                     | moderate                   | NO/NO                                                   | 11FEB2011/21FEB2011<br>/ 985      | 11                       | dose not changed                | YES/YES                                                   | recovered/<br>resolved                        |

**Table 14.3.2 / 2: Serious adverse events - Subject listing (FAS)**

TREATMENT: LCS12

| Subject/<br>age/sex/r<br>ace           | Primary<br>SOC/preferred<br>term/AEX                                                                       | AE<br>maximum<br>intensity | Related to study<br>drug/protocol-required<br>procedure | Onset date/stop<br>date/study day | AE<br>Duration<br>(days) | AE related study<br>drug action | AE related<br>drug<br>treatment/non<br>-drug<br>treatment | AE outcome                |
|----------------------------------------|------------------------------------------------------------------------------------------------------------|----------------------------|---------------------------------------------------------|-----------------------------------|--------------------------|---------------------------------|-----------------------------------------------------------|---------------------------|
| 160613/<br>34/femal<br>e/Caucas<br>ian | Gastrointestinal<br>disorders/Abdomin<br>al hernia/HERNIA<br>VENTRALIS                                     | moderate                   | NO/NO                                                   | 17AUG2010/18AUG20<br>10/ 978      | 2                        | dose not changed                | YES/NO                                                    | recovered/<br>resolved    |
| 160743/<br>18/femal<br>e/Caucas<br>ian | Pregnancy,<br>puerperium and<br>perinatal<br>conditions/Ectopic<br>pregnancy/EXTRA<br>UTERINE<br>PREGNANCY | mild                       | YES/NO                                                  | 23APR2008/05MAY20<br>08/ 97       | 13                       | drug withdrawn                  | NO/YES                                                    | recovered/<br>resolved    |
| 160757/<br>24/femal<br>e/Caucas<br>ian | Infections and<br>infestations/Gastro<br>enteritis/GASTRO<br>ENTERITIS                                     | moderate                   | NO/NO                                                   | 21OCT2008/ ./<br>245              | .                        | dose not changed                | YES/YES                                                   | continuing<br>with change |
| 160803/<br>23/femal<br>e/Caucas<br>ian | Injury, poisoning<br>and procedural<br>complications/Joint<br>sprain/DISTORSI<br>ON OF LEFT<br>KNEE        | moderate                   | NO/NO                                                   | 20AUG2009/ ./<br>540              | .                        | dose not changed                | YES/YES                                                   | continuing<br>with change |
| 160904/<br>21/femal<br>e/Caucas<br>ian | Infections and<br>infestations/Periton<br>sillar<br>abscess/PERITON<br>SILLARY<br>ABSCESS                  | moderate                   | NO/NO                                                   | 24OCT2008/06NOV200<br>8/ 354      | 14                       | dose not changed                | YES/YES                                                   | recovered/<br>resolved    |
| 160973/<br>30/femal<br>e/Caucas<br>ian | Infections and<br>infestations/Appen<br>dicitis/ACUTE<br>APPENDICITIS                                      | moderate                   | NO/NO                                                   | 02NOV2009/15NOV20<br>09/ 687      | 14                       | dose not changed                | YES/YES                                                   | recovered/<br>resolved    |

**Table 14.3.2 / 2: Serious adverse events - Subject listing (FAS)**

TREATMENT: LCS12

| Subject/<br>age/sex/r<br>ace           | Primary<br>SOC/preferred<br>term/AEX                                                                                  | AE<br>maximum<br>intensity | Related to study<br>drug/protocol-required<br>procedure | Onset date/stop<br>date/study day | AE<br>Duration<br>(days) | AE related study<br>drug action | AE related<br>drug<br>treatment/non<br>-drug<br>treatment | AE outcome                |
|----------------------------------------|-----------------------------------------------------------------------------------------------------------------------|----------------------------|---------------------------------------------------------|-----------------------------------|--------------------------|---------------------------------|-----------------------------------------------------------|---------------------------|
|                                        | Infections and<br>infestations/Periton<br>eal<br>abscess/PERITON<br>EAL ABSCESS                                       | moderate                   | NO/NO                                                   | 02NOV2009/15NOV20<br>09/ 687      | 14                       | dose not changed                | YES/YES                                                   | recovered/<br>resolved    |
|                                        | Reproductive<br>system and breast<br>disorders/Endometr<br>iosis/ENDOMETR<br>IOSIS IN<br>APPENDIX                     | moderate                   | NO/NO                                                   | 02NOV2009/15NOV20<br>09/ 687      | 14                       | dose not changed                | YES/YES                                                   | recovered/<br>resolved    |
| 161003/<br>19/femal<br>e/Caucas<br>ian | Infections and<br>infestations/Pneum<br>onia/PNEUMONI<br>A                                                            | moderate                   | NO/NO                                                   | 23JAN2009/25JAN2009<br>/ 478      | 3                        | dose not changed                | YES/NO                                                    | recovered/<br>resolved    |
| 161027/<br>22/femal<br>e/Caucas<br>ian | Reproductive<br>system and breast<br>disorders/Haemorr<br>hagic ovarian<br>cyst/HAEMORRH<br>AGIC CYST IN<br>THE OVARY | moderate                   | YES/NO                                                  | 20SEP2008/<br>293                 | .                        | dose not changed                | YES/NO                                                    | continuing<br>with change |
|                                        |                                                                                                                       | moderate                   | YES/NO                                                  | 14DEC2008/<br>378                 | .                        | dose not changed                | YES/NO                                                    | continuing<br>with change |

**Table 14.3.2 / 2: Serious adverse events - Subject listing (FAS)**

TREATMENT: LCS12

| Subject/<br>age/sex/r<br>ace           | Primary<br>SOC/preferred<br>term/AEX                                                                                                                                                            | AE<br>maximum<br>intensity | Related to study<br>drug/protocol-required<br>procedure | Onset date/stop<br>date/study day | AE<br>Duration<br>(days) | AE related study<br>drug action | AE related<br>drug<br>treatment/non<br>-drug<br>treatment | AE outcome             |
|----------------------------------------|-------------------------------------------------------------------------------------------------------------------------------------------------------------------------------------------------|----------------------------|---------------------------------------------------------|-----------------------------------|--------------------------|---------------------------------|-----------------------------------------------------------|------------------------|
| 161114/<br>23/femal<br>e/Caucas<br>ian | Neoplasms benign,<br>malignant and<br>unspecified (incl<br>cysts and<br>polyps)/Ovarian<br>germ cell teratoma<br>benign/LAPAROS<br>COPY DUE TO<br>SUSPICION OF<br>DERMOID CYST<br>IN LEFT OVARY | moderate                   | NO/NO                                                   | 14SEP2010/15SEP2010/<br>1042      | 2                        | dose not changed                | NO/NO                                                     | recovered/<br>resolved |
| 161416/<br>22/femal<br>e/Caucas<br>ian | Reproductive<br>system and breast<br>disorders/Ovarian<br>cyst<br>ruptured/RUPTUR<br>ED OVARIAN<br>CYST                                                                                         | severe                     | YES/NO                                                  | 06JAN2008/28JAN2008<br>/ 39       | 23                       | dose not changed                | NO/YES                                                    | recovered/<br>resolved |
| 161512/<br>18/femal<br>e/Caucas<br>ian | Infections and<br>infestations/Pyelon<br>ephritis<br>acute/ACUTE<br>PYELONEPHRITI<br>S                                                                                                          | severe                     | NO/NO                                                   | 08MAR2008/17MAR20<br>08/ 69       | 10                       | dose not changed                | YES/NO                                                    | recovered/<br>resolved |
| 161525/<br>19/femal<br>e/Caucas<br>ian | Infections and<br>infestations/Genital<br>herpes/HERPES<br>GENITALIS                                                                                                                            | severe                     | NO/NO                                                   | 04AUG2008/18AUG20<br>08/ 197      | 15                       | drug withdrawn                  | YES/NO                                                    | recovered/<br>resolved |
| 180116/<br>30/femal<br>e/Caucas<br>ian | Infections and<br>infestations/Pelvic<br>inflammatory<br>disease/PID                                                                                                                            | moderate                   | YES/NO                                                  | 14APR2010/20JUL2010<br>/ 855      | 98                       | drug withdrawn                  | YES/YES                                                   | recovered/<br>resolved |



**Table 14.3.2 / 2: Serious adverse events - Subject listing (FAS)**

TREATMENT: LCS12

| Subject/<br>age/sex/r<br>ace           | Primary<br>SOC/preferred<br>term/AEX                                                                                       | AE<br>maximum<br>intensity | Related to study<br>drug/protocol-required<br>procedure | Onset date/stop<br>date/study day | AE<br>Duration<br>(days) | AE related study<br>drug action | AE related<br>drug<br>treatment/non<br>-drug<br>treatment | AE outcome             |
|----------------------------------------|----------------------------------------------------------------------------------------------------------------------------|----------------------------|---------------------------------------------------------|-----------------------------------|--------------------------|---------------------------------|-----------------------------------------------------------|------------------------|
| 180420/<br>35/femal<br>e/Caucas<br>ian | Infections and<br>infestations/Pneum<br>onia/PNEUMONI<br>A                                                                 | severe                     | NO/NO                                                   | 12DEC2010/28JAN201<br>1/ 1074     | 48                       | dose not changed                | YES/NO                                                    | recovered/<br>resolved |
| 180501/<br>31/femal<br>e/Caucas<br>ian | Eye<br>disorders/Iridocycli<br>tis/IRIDOCYCLIT<br>IS                                                                       | moderate                   | NO/NO                                                   | 03JAN2008/14NOV200<br>8/ 29       | 317                      | drug withdrawn                  | YES/NO                                                    | recovered/<br>resolved |
| 180642/<br>31/femal<br>e/Caucas<br>ian | Injury, poisoning<br>and procedural<br>complications/Men<br>iscus<br>lesion/LESION OF<br>LATERAL<br>MENISC OF<br>LEFT KNEE | moderate                   | NO/NO                                                   | 21JUL2008/24JUL2008/<br>227       | 4                        | dose not changed                | YES/YES                                                   | recovered/<br>resolved |
|                                        | Musculoskeletal<br>and connective<br>tissue<br>disorders/Synovitis<br>/SYNOVITIS OF<br>LEFT KNEE                           | severe                     | NO/NO                                                   | 21JUL2008/24JUL2008/<br>227       | 4                        | dose not changed                | YES/YES                                                   | recovered/<br>resolved |
| 190636/<br>23/femal<br>e/Hispan<br>ic  | General disorders<br>and administration<br>site<br>conditions/Pyrexia/<br>FEVER (38.5<br>DEGREE<br>CELSIUS)                | mild                       | NO/NO                                                   | 22SEP2009/22SEP2009/<br>492       | 1                        | dose not changed                | YES/NO                                                    | recovered/<br>resolved |

**Table 14.3.2 / 2: Serious adverse events - Subject listing (FAS)**

TREATMENT: LCS12

| Subject/<br>age/sex/r<br>ace           | Primary<br>SOC/preferred<br>term/AEX                                                                                                                | AE<br>maximum<br>intensity | Related to study<br>drug/protocol-required<br>procedure | Onset date/stop<br>date/study day | AE<br>Duration<br>(days) | AE related study<br>drug action | AE related<br>drug<br>treatment/non<br>-drug<br>treatment | AE outcome             |
|----------------------------------------|-----------------------------------------------------------------------------------------------------------------------------------------------------|----------------------------|---------------------------------------------------------|-----------------------------------|--------------------------|---------------------------------|-----------------------------------------------------------|------------------------|
|                                        | Pregnancy,<br>puerperium and<br>perinatal<br>conditions/Abortio<br>n<br>spontaneous/EARL<br>Y PREGNANCY<br>LOSS                                     | moderate                   | YES/NO                                                  | 22SEP2009/24SEP2009/<br>492       | 3                        | drug withdrawn                  | YES/YES                                                   | recovered/<br>resolved |
|                                        | Pregnancy,<br>puerperium and<br>perinatal<br>conditions/Prematu<br>re separation of<br>placenta/PLACEN<br>TAL<br>ABRUPTION IN<br>EARLY<br>PREGNANCY | moderate                   | YES/NO                                                  | 22SEP2009/24SEP2009/<br>492       | 3                        | drug withdrawn                  | NO/YES                                                    | recovered/<br>resolved |
| 200219/<br>18/femal<br>e/Caucas<br>ian | Reproductive<br>system and breast<br>disorders/Ovarian<br>cyst/OVARIAN<br>CYST RIGHT<br>SIDE                                                        | severe                     | NO/NO                                                   | 10MAR2009/10MAR20<br>09/ 373      | 1                        | dose not changed                | NO/YES                                                    | recovered/<br>resolved |
| 200908/<br>28/femal<br>e/Caucas<br>ian | Gastrointestinal<br>disorders/Abdomin<br>al<br>adhesions/ADHES<br>IONS INTRA<br>ABDOMINAL                                                           | severe                     | NO/NO                                                   | 10AUG2009/12AUG20<br>09/ 574      | 3                        | dose not changed                | YES/NO                                                    | recovered/<br>resolved |

**Table 14.3.2 / 2: Serious adverse events - Subject listing (FAS)**

TREATMENT: LCS12

| Subject/<br>age/sex/r<br>ace           | Primary<br>SOC/preferred<br>term/AEX                                                                                            | AE<br>maximum<br>intensity | Related to study<br>drug/protocol-required<br>procedure | Onset date/stop<br>date/study day | AE<br>Duration<br>(days) | AE related study<br>drug action | AE related<br>drug<br>treatment/non<br>-drug<br>treatment | AE outcome                                    |
|----------------------------------------|---------------------------------------------------------------------------------------------------------------------------------|----------------------------|---------------------------------------------------------|-----------------------------------|--------------------------|---------------------------------|-----------------------------------------------------------|-----------------------------------------------|
|                                        | Gastrointestinal<br>disorders/Abdomin<br>al<br>pain/ABDOMINA<br>L PAIN                                                          | severe                     | NO/NO                                                   | 26FEB2008/28FEB2008<br>/ 43       | 3                        | dose not changed                | NO/NO                                                     | recovered/<br>resolved                        |
|                                        | Gastrointestinal<br>disorders/Constipat<br>ion/OBSTIPATIO<br>N                                                                  | severe                     | NO/NO                                                   | 26FEB2008/28FEB2008<br>/ 43       | 3                        | dose not changed                | YES/NO                                                    | recovered/<br>resolved                        |
| 210203/<br>28/femal<br>e/Caucas<br>ian | Gastrointestinal<br>disorders/Abdomin<br>al<br>pain/ABDOMINA<br>L PAIN                                                          | moderate                   | NO/NO                                                   | 11MAR2010/13MAR20<br>10/ 820      | 3                        | dose not changed                | NO/NO                                                     | recovered/<br>resolved                        |
| 210411/<br>28/femal<br>e/Caucas<br>ian | Reproductive<br>system and breast<br>disorders/Haemorr<br>hagic ovarian<br>cyst/CORPUS<br>LUTEUM<br>HEMORRHAGE<br>(RIGHT OVARY) | severe                     | NO/NO                                                   | 11DEC2008/11DEC200<br>8/ 304      | 1                        | dose not changed                | NO/YES                                                    | recovered/<br>resolved                        |
| 230201/<br>34/femal<br>e/Caucas<br>ian | Hepatobiliary<br>disorders/Cholecys<br>titis/CHOLECYST<br>ITIS                                                                  | severe                     | NO/NO                                                   | 13NOV2009/19NOV20<br>09/ 768      | 7                        | dose not changed                | YES/YES                                                   | recovered/<br>resolved with<br>resid. effects |
| 230303/<br>20/femal<br>e/Caucas<br>ian | Pregnancy,<br>puerperium and<br>perinatal<br>conditions/Ectopic<br>pregnancy/ECTOP<br>IC PREGNANCY                              | mild                       | NO/NO                                                   | 15JUN2009/18JUN2009<br>/ 519      | 4                        | drug withdrawn                  | YES/YES                                                   | recovered/<br>resolved                        |

**Table 14.3.2 / 2: Serious adverse events - Subject listing (FAS)**

TREATMENT: LCS12

| Subject/<br>age/sex/r<br>ace           | Primary<br>SOC/preferred<br>term/AEX                                                       | AE<br>maximum<br>intensity | Related to study<br>drug/protocol-required<br>procedure | Onset date/stop<br>date/study day | AE<br>Duration<br>(days) | AE related study<br>drug action | AE related<br>drug<br>treatment/non<br>-drug<br>treatment | AE outcome                |
|----------------------------------------|--------------------------------------------------------------------------------------------|----------------------------|---------------------------------------------------------|-----------------------------------|--------------------------|---------------------------------|-----------------------------------------------------------|---------------------------|
| 230408/<br>31/femal<br>e/Caucas<br>ian | Infections and<br>infestations/Vestib<br>ular<br>neuronitis/VESTIB<br>ULERIS<br>NEURONITIS | severe                     | NO/NO                                                   | 10MAR2008/09DEC20<br>08/ 85       | 275                      | dose not changed                | YES/NO                                                    | recovered/<br>resolved    |
| 230501/<br>35/femal<br>e/Hispan<br>ic  | Investigations/Wei<br>ght<br>increased/WEIGH<br>T GAIN                                     | severe                     | NO/NO                                                   | 14APR2010/28APR201<br>0/ 850      | 15                       | dose not changed                | YES/YES                                                   | recovered/<br>resolved    |
|                                        | Renal and urinary<br>disorders/Strangur<br>y/STRANGURY                                     | moderate                   | NO/NO                                                   | 29OCT2008/30OCT200<br>8/ 318      | 2                        | dose not changed                | YES/YES                                                   | recovered/<br>resolved    |
| 230615/<br>19/femal<br>e/Caucas<br>ian | Reproductive<br>system and breast<br>disorders/Uterine<br>spasm/UTERINE<br>CRAMPS          | severe                     | NO/YES                                                  | 31JAN2008/05FEB2008<br>/ 1        | 6                        | drug withdrawn                  | YES/NO                                                    | recovered/<br>resolved    |
| 230720/<br>33/femal<br>e/Caucas<br>ian | Injury, poisoning<br>and procedural<br>complications/Over<br>dose/MEDICATIO<br>N OVERDOSE  | severe                     | NO/NO                                                   | 14JAN2011/17JAN2011<br>/ 1045     | 4                        | dose not changed                | YES/YES                                                   | recovering/<br>resolving  |
|                                        | Psychiatric<br>disorders/Anxiety/<br>ANXIETY                                               | severe                     | NO/NO                                                   | 21OCT2009/19NOV200<br>9/ 595      | 30                       | dose not changed                | YES/NO                                                    | continuing<br>with change |
|                                        |                                                                                            | severe                     | NO/NO                                                   | 22FEB2010/13APR201<br>0/ 719      | 51                       | dose not changed                | YES/NO                                                    | continuing<br>with change |
|                                        | Psychiatric<br>disorders/Anxiety/<br>WORSENING OF<br>ANXIETY                               | severe                     | NO/NO                                                   | 16JUL2009/29JUL2009/<br>498       | 14                       | dose not changed                | YES/NO                                                    | continuing<br>with change |

**Table 14.3.2 / 2: Serious adverse events - Subject listing (FAS)**

TREATMENT: LCS12

| Subject/<br>age/sex/r<br>ace           | Primary<br>SOC/preferred<br>term/AEX                                            | AE<br>maximum<br>intensity | Related to study<br>drug/protocol-required<br>procedure | Onset date/stop<br>date/study day | AE<br>Duration<br>(days) | AE related study<br>drug action | AE related<br>drug<br>treatment/non<br>-drug<br>treatment | AE outcome                     |
|----------------------------------------|---------------------------------------------------------------------------------|----------------------------|---------------------------------------------------------|-----------------------------------|--------------------------|---------------------------------|-----------------------------------------------------------|--------------------------------|
|                                        | Psychiatric<br>disorders/Depressi<br>on/DEPRESSION                              | severe                     | NO/NO                                                   | 16JUL2009/29JUL2009/<br>498       | 14                       | dose not changed                | YES/NO                                                    | continuing<br>with change      |
|                                        |                                                                                 | severe                     | NO/NO                                                   | 21OCT2009/19NOV200<br>9/ 595      | 30                       | dose not changed                | YES/NO                                                    | continuing<br>with change      |
|                                        |                                                                                 | severe                     | NO/NO                                                   | 22FEB2010/13APR201<br>0/ 719      | 51                       | dose not changed                | YES/NO                                                    | continuing<br>with change      |
|                                        | Psychiatric<br>disorders/Depressi<br>on/WORSENING<br>OF DEPRESSION              | severe                     | NO/NO                                                   | 16JUL2009/ /<br>498               | .                        | dose not changed                | YES/NO                                                    | not recovered/<br>not resolved |
| 240209/<br>23/femal<br>e/other         | Gastrointestinal<br>disorders/Crohn's<br>disease/CROHN'S<br>DISEASE             | severe                     | NO/NO                                                   | 25JUL2008/ /<br>233               | .                        | dose not changed                | YES/YES                                                   | continuing<br>with change      |
|                                        | Gastrointestinal<br>disorders/Impaired<br>gastric<br>emptying/GASTR<br>OPARESIS | severe                     | NO/NO                                                   | 25JUL2008/ /<br>233               | .                        | dose not changed                | YES/YES                                                   | continuing<br>with change      |
|                                        | Renal and urinary<br>disorders/Haematur<br>ia/HEMATURIA                         | severe                     | NO/NO                                                   | 25JUL2008/31JUL2008/<br>233       | 7                        | dose not changed                | NO/NO                                                     | recovered/<br>resolved         |
| 240215/<br>26/femal<br>e/Caucas<br>ian | Hepatobiliary<br>disorders/Cholecys<br>titis/CHOLECYST<br>ITIS                  | severe                     | NO/NO                                                   | 14NOV2008/16NOV20<br>08/ 354      | 3                        | dose not changed                | NO/YES                                                    | recovered/<br>resolved         |
|                                        | Hepatobiliary<br>disorders/Gallbladd<br>er<br>polyp/GALLBLA<br>DDER POLYP       | moderate                   | NO/NO                                                   | 14NOV2008/16NOV20<br>08/ 354      | 3                        | dose not changed                | NO/YES                                                    | recovered/<br>resolved         |

**Table 14.3.2 / 2: Serious adverse events - Subject listing (FAS)**

TREATMENT: LCS12

| Subject/<br>age/sex/r<br>ace           | Primary<br>SOC/preferred<br>term/AEX                                                                                                               | AE<br>maximum<br>intensity | Related to study<br>drug/protocol-required<br>procedure | Onset date/stop<br>date/study day | AE<br>Duration<br>(days) | AE related study<br>drug action | AE related<br>drug<br>treatment/non<br>-drug<br>treatment | AE outcome             |
|----------------------------------------|----------------------------------------------------------------------------------------------------------------------------------------------------|----------------------------|---------------------------------------------------------|-----------------------------------|--------------------------|---------------------------------|-----------------------------------------------------------|------------------------|
| 240510/<br>28/femal<br>e/Caucas<br>ian | Respiratory,<br>thoracic and<br>mediastinal<br>disorders/Pneumot<br>horax/MULTIPLE<br>RECURRENT<br>SPONTANEOUS<br>LEFT SIDED<br>PNEUMOTHORA<br>CES | moderate                   | NO/NO                                                   | 02SEP2009/04SEP2009/<br>560       | 3                        | dose not changed                | YES/YES                                                   | recovered/<br>resolved |
| 240521/<br>23/femal<br>e/Caucas<br>ian | Infections and<br>infestations/Diverti<br>culitis/ACUTE<br>DIVERTICULITIS                                                                          | severe                     | NO/NO                                                   | 05FEB2009/30MAR200<br>9/ 283      | 54                       | dose not changed                | YES/NO                                                    | recovered/<br>resolved |
| 240841/<br>33/femal<br>e/Caucas<br>ian | Gastrointestinal<br>disorders/Abdomin<br>al<br>pain/ABDOMINA<br>L PAIN                                                                             | moderate                   | NO/NO                                                   | 20AUG2008/03NOV20<br>08/ 140      | 76                       | drug withdrawn                  | NO/YES                                                    | recovered/<br>resolved |
|                                        | Neoplasms benign,<br>malignant and<br>unspecified (incl<br>cysts and<br>polyps)/Uterine<br>leiomyoma/ENDO<br>METRIAL<br>LEIOMYOMA                  | moderate                   | NO/NO                                                   | 20AUG2008/04NOV20<br>08/ 140      | 77                       | drug withdrawn                  | NO/YES                                                    | recovered/<br>resolved |
| 241106/<br>29/femal<br>e/Caucas<br>ian | Infections and<br>infestations/Appen<br>dicitis/APPENDIC<br>ITIS                                                                                   | severe                     | NO/NO                                                   | 31AUG2008/02SEP200<br>8/ 314      | 3                        | dose not changed                | YES/YES                                                   | recovered/<br>resolved |

**Table 14.3.2 / 2: Serious adverse events - Subject listing (FAS)**

TREATMENT: LCS12

| Subject/<br>age/sex/r<br>ace           | Primary<br>SOC/preferred<br>term/AEX                                                                                | AE<br>maximum<br>intensity | Related to study<br>drug/protocol-required<br>procedure | Onset date/stop<br>date/study day | AE<br>Duration<br>(days) | AE related study<br>drug action | AE related<br>drug<br>treatment/non<br>-drug<br>treatment | AE outcome                     |
|----------------------------------------|---------------------------------------------------------------------------------------------------------------------|----------------------------|---------------------------------------------------------|-----------------------------------|--------------------------|---------------------------------|-----------------------------------------------------------|--------------------------------|
| 241153/<br>32/femal<br>e/Caucas<br>ian | Neoplasms benign,<br>malignant and<br>unspecified (incl<br>cysts and<br>polyps)/Thyroid<br>cancer/THYROID<br>CANCER | severe                     | NO/NO                                                   | 15AUG2009/<br>542                 | .                        | dose not changed                | YES/YES                                                   | UNK                            |
| 241172/<br>35/femal<br>e/Caucas<br>ian | Endocrine<br>disorders/Goitre/E<br>NLARGED<br>THYROID                                                               | severe                     | NO/NO                                                   | 15MAY2009/22MAY20<br>09/ 452      | 8                        | dose not changed                | YES/YES                                                   | recovered/<br>resolved         |
|                                        | Infections and<br>infestations/Appen<br>dicitis/APPENDIC<br>ITIS                                                    | severe                     | NO/NO                                                   | 15OCT2008/16OCT200<br>8/ 240      | 2                        | dose not changed                | YES/YES                                                   | recovered/<br>resolved         |
| 241410/<br>27/femal<br>e/Caucas<br>ian | Gastrointestinal<br>disorders/Abdomin<br>al<br>pain/ABDOMINA<br>L PAIN                                              | severe                     | YES/NO                                                  | 16JAN2008/01MAY200<br>8/ 1        | 107                      | drug withdrawn                  | YES/YES                                                   | recovered/<br>resolved         |
|                                        | Infections and<br>infestations/Pyelon<br>ephritis/POSSIBL<br>E<br>PYELONEPHRITI<br>S                                | moderate                   | NO/NO                                                   | 29APR2008/<br>105                 | .                        | drug withdrawn                  | YES/YES                                                   | not recovered/<br>not resolved |
|                                        | Infections and<br>infestations/Urinar<br>y tract<br>infection/URINAR<br>Y TRACT<br>INFECTION                        | severe                     | NO/NO                                                   | 29APR2008/10MAY20<br>08/ 105      | 12                       | drug withdrawn                  | YES/YES                                                   | recovered/<br>resolved         |

**Table 14.3.2 / 2: Serious adverse events - Subject listing (FAS)**

TREATMENT: LCS12

| Subject/<br>age/sex/r<br>ace           | Primary<br>SOC/preferred<br>term/AEX                                                                              | AE<br>maximum<br>intensity | Related to study<br>drug/protocol-required<br>procedure | Onset date/stop<br>date/study day | AE<br>Duration<br>(days) | AE related study<br>drug action | AE related<br>drug<br>treatment/non<br>-drug<br>treatment | AE outcome                     |
|----------------------------------------|-------------------------------------------------------------------------------------------------------------------|----------------------------|---------------------------------------------------------|-----------------------------------|--------------------------|---------------------------------|-----------------------------------------------------------|--------------------------------|
| 241536/<br>28/femal<br>e/other         | Hepatobiliary<br>disorders/Cholecys<br>titis<br>chronic/CHRONIC<br>CHOLECYSTITIS<br>MILD                          | mild                       | NO/NO                                                   | 14MAY2008/22MAY20<br>08/ 52       | 9                        | dose not changed                | NO/YES                                                    | recovered/<br>resolved         |
|                                        | Infections and<br>infestations/Celluli<br>tis/RIGHT<br>ABDOMINAL<br>WALL<br>CELLULITIS                            | moderate                   | NO/NO                                                   | 04DEC2009/ ./<br>621              | .                        | dose not changed                | YES/NO                                                    | continuing<br>with change      |
|                                        |                                                                                                                   | moderate                   | NO/NO                                                   | 14DEC2009/ ./<br>631              | .                        | dose not changed                | YES/NO                                                    | continuing<br>with change      |
| 241708/<br>24/femal<br>e/Caucas<br>ian | Surgical and<br>medical<br>procedures/Detoxifi<br>cation/DETOXIFI<br>CATION                                       | severe                     | NO/NO                                                   | 01MAR2010/ ./<br>788              | .                        | dose not changed                | YES/YES                                                   | not recovered/<br>not resolved |
| 242212/<br>27/femal<br>e/Hispan<br>ic  | Infections and<br>infestations/Entero<br>colitis<br>infectious/INFECT<br>IOUS COLITIS                             | moderate                   | NO/NO                                                   | 01AUG2009/ ./<br>508              | .                        | dose not changed                | YES/YES                                                   | continuing<br>with change      |
| 242320/<br>23/femal<br>e/Hispan<br>ic  | General disorders<br>and administration<br>site<br>conditions/Chest<br>pain/ATYPICAL<br>CHEST PAINS-<br>BILATERAL | severe                     | NO/NO                                                   | 04JAN2011/04JAN2011<br>/ 1036     | 1                        | dose not changed                | YES/NO                                                    | recovered/<br>resolved         |



**Table 14.3.2 / 2: Serious adverse events - Subject listing (FAS)**

TREATMENT: LCS12

| Subject/<br>age/sex/r<br>ace           | Primary<br>SOC/preferred<br>term/AEX                                                                        | AE<br>maximum<br>intensity | Related to study<br>drug/protocol-required<br>procedure | Onset date/stop<br>date/study day | AE<br>Duration<br>(days) | AE related study<br>drug action | AE related<br>drug<br>treatment/non<br>-drug<br>treatment | AE outcome                |
|----------------------------------------|-------------------------------------------------------------------------------------------------------------|----------------------------|---------------------------------------------------------|-----------------------------------|--------------------------|---------------------------------|-----------------------------------------------------------|---------------------------|
|                                        | Vascular<br>disorders/Hyperten<br>sion/HYPERTENS<br>ION                                                     | severe                     | NO/NO                                                   | 04JAN2011/<br>1036                | .                        | dose not changed                | YES/NO                                                    | continuing<br>with change |
| 242807/<br>21/femal<br>e/Caucas<br>ian | Nervous system<br>disorders/Status<br>migrainosus/STAT<br>US<br>MIGRAINOUSUS                                | severe                     | NO/NO                                                   | 24MAR2008/27MAR20<br>08/ 11       | 4                        | dose not changed                | YES/NO                                                    | recovered/<br>resolved    |
| 243938/<br>20/femal<br>e/Caucas<br>ian | Blood and<br>lymphatic system<br>disorders/Spherocy<br>tic<br>anaemia/ANEMIA<br>DUE TO<br>SPHEROCYTOSI<br>S | severe                     | NO/NO                                                   | 22MAY2008/24MAY20<br>08/ 56       | 3                        | dose not changed                | YES/NO                                                    | recovered/<br>resolved    |
|                                        | Blood and<br>lymphatic system<br>disorders/Splenom<br>egaly/SPLEENOM<br>EGALY                               | moderate                   | NO/NO                                                   | 23JUL2008/29JUL2008/<br>118       | 7                        | dose not changed                | YES/YES                                                   | recovered/<br>resolved    |
|                                        | Blood and<br>lymphatic system<br>disorders/Splenom<br>egaly/SPLENOME<br>GALY                                | mild                       | NO/NO                                                   | 22MAY2008/<br>56                  | .                        | dose not changed                | YES/NO                                                    | continuing<br>with change |
|                                        | Hepatobiliary<br>disorders/Cholelith<br>iasis/CHOLELITH<br>IASIS                                            | mild                       | NO/NO                                                   | 22MAY2008/<br>56                  | .                        | dose not changed                | YES/NO                                                    | continuing<br>with change |
|                                        |                                                                                                             | mild                       | NO/NO                                                   | 23JUL2008/29JUL2008/<br>118       | 7                        | dose not changed                | YES/YES                                                   | recovered/<br>resolved    |

**Table 14.3.2 / 2: Serious adverse events - Subject listing (FAS)**

TREATMENT: LCS12

| Subject/<br>age/sex/r<br>ace           | Primary<br>SOC/preferred<br>term/AEX                                                                  | AE<br>maximum<br>intensity | Related to study<br>drug/protocol-required<br>procedure | Onset date/stop<br>date/study day | AE<br>Duration<br>(days) | AE related study<br>drug action | AE related<br>drug<br>treatment/non<br>-drug<br>treatment | AE outcome                |
|----------------------------------------|-------------------------------------------------------------------------------------------------------|----------------------------|---------------------------------------------------------|-----------------------------------|--------------------------|---------------------------------|-----------------------------------------------------------|---------------------------|
| 244422/<br>20/femal<br>e/Caucas<br>ian | Psychiatric<br>disorders/Depressi<br>on<br>suicidal/DEPRESS<br>ION WITH<br>SUICIDAL<br>TENDANCIES     | severe                     | NO/NO                                                   | 04APR2009/<br>396                 | .                        | dose not changed                | YES/NO                                                    | continuing<br>with change |
|                                        | Psychiatric<br>disorders/Suicide<br>attempt/SUICIDE<br>ATTEMPT                                        | severe                     | NO/NO                                                   | 04APR2009/04APR200<br>9/ 396      | 1                        | dose not changed                | YES/NO                                                    | recovered/<br>resolved    |
| 244438/<br>25/femal<br>e/Caucas<br>ian | Infections and<br>infestations/Pelvic<br>inflammatory<br>disease/PELVIC-<br>INFLAMMATOR<br>Y DISEASE. | severe                     | YES/YES                                                 | 30APR2008/<br>27                  | .                        | drug withdrawn                  | YES/NO                                                    | continuing<br>with change |
|                                        | Infections and<br>infestations/Tubo-<br>ovarian<br>abscess/TUBAL<br>OVARIAN<br>ABSCESS                | severe                     | YES/YES                                                 | 30APR2008/<br>27                  | .                        | drug withdrawn                  | YES/NO                                                    | continuing<br>with change |
| 244602/<br>33/femal<br>e/Black         | Infections and<br>infestations/Strepto<br>coccal<br>sepsis/STREPTOC<br>OCCAL SEPSIS<br>SYNDROME       | severe                     | NO/NO                                                   | 03SEP2009/15SEP2009/<br>519       | 13                       | dose not changed                | YES/NO                                                    | recovered/<br>resolved    |

**Table 14.3.2 / 2: Serious adverse events - Subject listing (FAS)**

TREATMENT: LCS12

| Subject/<br>age/sex/r<br>ace           | Primary<br>SOC/preferred<br>term/AEX                                                                            | AE<br>maximum<br>intensity | Related to study<br>drug/protocol-required<br>procedure | Onset date/stop<br>date/study day | AE<br>Duration<br>(days) | AE related study<br>drug action | AE related<br>drug<br>treatment/non<br>-drug<br>treatment | AE outcome             |
|----------------------------------------|-----------------------------------------------------------------------------------------------------------------|----------------------------|---------------------------------------------------------|-----------------------------------|--------------------------|---------------------------------|-----------------------------------------------------------|------------------------|
|                                        | Infections and<br>infestations/Upper<br>respiratory tract<br>infection/UPPER<br>RESPIRATORY<br>STEP INFECTION   | severe                     | NO/NO                                                   | 03SEP2009/15SEP2009/<br>519       | 13                       | dose not changed                | NO/NO                                                     | recovered/<br>resolved |
| 245003/<br>27/femal<br>e/Caucas<br>ian | Pregnancy,<br>puerperium and<br>perinatal<br>conditions/Abortio<br>n<br>spontaneous/SPON<br>TANEOUS<br>ABORTION | severe                     | NO/NO                                                   | 23NOV2008/23NOV20<br>08/ 322      | 1                        | .                               | NO/NO                                                     | recovered/<br>resolved |
| 245431/<br>24/femal<br>e/Hispan<br>ic  | Infections and<br>infestations/Herpes<br>dermatitis/HERPE<br>S SIMPLEX<br>VIRUS<br>INFECTION ALL<br>OVER BODY   | moderate                   | NO/NO                                                   | 16JUN2010/28JUN2010<br>/ 749      | 13                       | dose not changed                | YES/NO                                                    | recovered/<br>resolved |
|                                        | Skin and<br>subcutaneous<br>tissue<br>disorders/Erythema<br>multiforme/ERYT<br>HEMA<br>MULTIFORME               | moderate                   | NO/NO                                                   | 16JUN2010/28JUN2010<br>/ 749      | 13                       | dose not changed                | YES/NO                                                    | recovered/<br>resolved |
| 245503/<br>32/femal<br>e/Hispan<br>ic  | Renal and urinary<br>disorders/Stress<br>urinary<br>incontinence/STRE<br>SS<br>INCONTINENCE                     | severe                     | NO/NO                                                   | 01NOV2010/01NOV20<br>10/ 1023     | 1                        | drug withdrawn                  | NO/YES                                                    | recovered/<br>resolved |

**Table 14.3.2 / 2: Serious adverse events - Subject listing (FAS)**

TREATMENT: LCS12

| Subject/<br>age/sex/r<br>ace           | Primary<br>SOC/preferred<br>term/AEX                                                                                 | AE<br>maximum<br>intensity | Related to study<br>drug/protocol-required<br>procedure | Onset date/stop<br>date/study day | AE<br>Duration<br>(days) | AE related study<br>drug action | AE related<br>drug<br>treatment/non<br>-drug<br>treatment | AE outcome                     |
|----------------------------------------|----------------------------------------------------------------------------------------------------------------------|----------------------------|---------------------------------------------------------|-----------------------------------|--------------------------|---------------------------------|-----------------------------------------------------------|--------------------------------|
|                                        | Reproductive<br>system and breast<br>disorders/Uterine<br>prolapse/UTERIN<br>E PROLAPSE                              | severe                     | NO/NO                                                   | 01NOV2010/01NOV20<br>10/ 1023     | 1                        | drug withdrawn                  | NO/YES                                                    | recovered/<br>resolved         |
| 245701/<br>24/femal<br>e/Caucas<br>ian | Immune system<br>disorders/Drug<br>hypersensitivity/A<br>LLERGIC<br>REACTION TO<br>AMOXICILLIN                       | moderate                   | NO/NO                                                   | 05JAN2011/05JAN2011<br>/ 1039     | 1                        | dose not changed                | YES/YES                                                   | recovered/<br>resolved         |
| 246212/<br>20/femal<br>e/Caucas<br>ian | Neoplasms benign,<br>malignant and<br>unspecified (incl<br>cysts and<br>polyps)/Acute<br>leukaemia/ACUTE<br>LEUKEMIA | severe                     | NO/NO                                                   | 21NOV2010/ /<br>929               | .                        | .                               | YES/NO                                                    | not recovered/<br>not resolved |

Note: AEX=adverse event verbatim investigator term. SOC=System Organ Class.

Note: Study day is calculated from the first day of study drug administration. The formula for this calculation is:  
 (onset day of AE minus medication day) plus 1 day.

Note: Dictionary/ MedDRA Version 14.0

Global Biostatistics: /by-sasp/patdb/projects/de04209/310442/stat/prod\_interim03/pgms/t-sae.sas epkl 12OCT2011 11:27

Table 14.3.2 / 2: Serious adverse events - Subject listing (FAS) (cont.)

TREATMENT: LCS16

| Subject/<br>age/sex/r<br>ace           | Primary<br>SOC/preferred<br>term/AEX                                                                           | AE<br>maximum<br>intensity | Related to study<br>drug/protocol-required<br>procedure | Onset date/stop<br>date/study day | AE<br>Duration<br>(days) | AE related study<br>drug action | AE related<br>drug<br>treatment/non<br>-drug<br>treatment | AE outcome                |
|----------------------------------------|----------------------------------------------------------------------------------------------------------------|----------------------------|---------------------------------------------------------|-----------------------------------|--------------------------|---------------------------------|-----------------------------------------------------------|---------------------------|
| 120404/<br>29/femal<br>e/Caucas<br>ian | Gastrointestinal<br>disorders/Umbilica<br>l<br>hernia/UMBILICA<br>L HERNIA                                     | mild                       | NO/NO                                                   | 14SEP2010/01OCT2010<br>/ 837      | 18                       | dose not changed                | YES/YES                                                   | recovered/<br>resolved    |
| 120607/<br>33/femal<br>e/Hispan<br>ic  | Gastrointestinal<br>disorders/Gastritis/<br>ACUTE<br>GASTRITIS                                                 | severe                     | NO/NO                                                   | 30OCT2010/01NOV201<br>0/ 964      | 3                        | dose not changed                | YES/NO                                                    | recovered/<br>resolved    |
| 140702/<br>21/femal<br>e/Caucas<br>ian | Injury, poisoning<br>and procedural<br>complications/Ankle<br>fracture/FRACTU<br>RED RIGHT<br>ANKLE            | moderate                   | NO/NO                                                   | 11JUL2009/13JUL2009/<br>494       | 3                        | dose not changed                | YES/YES                                                   | recovered/<br>resolved    |
| 140704/<br>24/femal<br>e/Caucas<br>ian | Musculoskeletal<br>and connective<br>tissue<br>disorders/Joint<br>instability/INSTA<br>BILITY LEFT<br>SHOULDER | moderate                   | NO/NO                                                   | 01FEB2011/ ./<br>1055             | .                        | dose not changed                | YES/YES                                                   | recovering/<br>resolving  |
| 140805/<br>24/femal<br>e/Caucas<br>ian | Psychiatric<br>disorders/Anxiety/<br>WORSENING<br>ANXIETY                                                      | severe                     | NO/NO                                                   | 11MAY2010/ ./<br>813              | .                        | dose not changed                | YES/NO                                                    | continuing<br>with change |
| 141023/<br>27/femal<br>e/Caucas<br>ian | Infections and<br>infestations/Pyelon<br>ephritis/PYELONE<br>PHRITIS                                           | severe                     | NO/NO                                                   | 06AUG2008/09AUG20<br>08/ 101      | 4                        | drug withdrawn                  | YES/NO                                                    | recovered/<br>resolved    |

Table 14.3.2 / 2: Serious adverse events - Subject listing (FAS) (cont.)

TREATMENT: LCS16

| Subject/<br>age/sex/r<br>ace           | Primary<br>SOC/preferred<br>term/AEX                                                                              | AE<br>maximum<br>intensity | Related to study<br>drug/protocol-required<br>procedure | Onset date/stop<br>date/study day | AE<br>Duration<br>(days) | AE related study<br>drug action | AE related<br>drug<br>treatment/non<br>-drug<br>treatment | AE outcome                                    |
|----------------------------------------|-------------------------------------------------------------------------------------------------------------------|----------------------------|---------------------------------------------------------|-----------------------------------|--------------------------|---------------------------------|-----------------------------------------------------------|-----------------------------------------------|
| 141407/<br>28/femal<br>e/Caucas<br>ian | Infections and<br>infestations/Pelvic<br>inflammatory<br>disease/PELVIC<br>INFLAMMATOR<br>Y DISEASE               | moderate                   | YES/NO                                                  | 04APR2008/11APR200<br>8/ 17       | 8                        | drug withdrawn                  | YES/NO                                                    | recovered/<br>resolved                        |
| 141413/<br>21/femal<br>e/Caucas<br>ian | Metabolism and<br>nutrition<br>disorders/Diabetic<br>ketoacidosis/DIAB<br>ETIC<br>KETOACIDOSIS -<br>WORSENING OF  | moderate                   | NO/NO                                                   | 10JAN2010/13JAN2010<br>/ 655      | 4                        | dose not changed                | YES/YES                                                   | recovered/<br>resolved                        |
| 141415/<br>21/femal<br>e/other         | Infections and<br>infestations/Appen<br>dicitis/APPENDIC<br>ITIS                                                  | moderate                   | NO/NO                                                   | 21DEC2009/24DEC200<br>9/ 623      | 4                        | dose not changed                | YES/YES                                                   | recovered/<br>resolved                        |
| 160410/<br>35/femal<br>e/Caucas<br>ian | Infections and<br>infestations/Pelvic<br>inflammatory<br>disease/PID                                              | severe                     | YES/YES                                                 | 20DEC2007/24JAN200<br>8/ 2        | 36                       | drug withdrawn                  | YES/NO                                                    | recovered/<br>resolved                        |
| 160419/<br>28/femal<br>e/Caucas<br>ian | Musculoskeletal<br>and connective<br>tissue<br>disorders/Loose<br>body in<br>joint/CORPUS<br>LIBERA GENUS<br>L DX | moderate                   | NO/NO                                                   | 22JUN2009/23JUN2009<br>/ 599      | 2                        | dose not changed                | NO/YES                                                    | recovered/<br>resolved with<br>resid. effects |

Table 14.3.2 / 2: Serious adverse events - Subject listing (FAS) (cont.)

TREATMENT: LCS16

| Subject/<br>age/sex/r<br>ace           | Primary<br>SOC/preferred<br>term/AEX                                                                                  | AE<br>maximum<br>intensity | Related to study<br>drug/protocol-required<br>procedure | Onset date/stop<br>date/study day | AE<br>Duration<br>(days) | AE related study<br>drug action | AE related<br>drug<br>treatment/non<br>-drug<br>treatment | AE outcome             |
|----------------------------------------|-----------------------------------------------------------------------------------------------------------------------|----------------------------|---------------------------------------------------------|-----------------------------------|--------------------------|---------------------------------|-----------------------------------------------------------|------------------------|
| 160423/<br>26/femal<br>e/Caucas<br>ian | Pregnancy,<br>puerperium and<br>perinatal<br>conditions/Ectopic<br>pregnancy/ECTOP<br>IC PREGNANCY                    | moderate                   | YES/YES                                                 | 09OCT2008/28NOV200<br>8/ 297      | 51                       | drug withdrawn                  | NO/YES                                                    | recovered/<br>resolved |
| 160438/<br>34/femal<br>e/Caucas<br>ian | Infections and<br>infestations/Infecti<br>on/INFECTION IN<br>BOTH HANDS                                               | moderate                   | NO/NO                                                   | 14JUL2009/18AUG200<br>9/ 537      | 36                       | dose not changed                | YES/NO                                                    | recovered/<br>resolved |
| 160556/<br>33/femal<br>e/Caucas<br>ian | Musculoskeletal<br>and connective<br>tissue<br>disorders/Axillary<br>mass/CLUMP IN<br>THE RIGHT<br>ARMBIT<br>OPERATED | moderate                   | NO/NO                                                   | 13JAN2009/15JAN2009<br>/ 450      | 3                        | dose not changed                | NO/YES                                                    | recovered/<br>resolved |
| 160919/<br>33/femal<br>e/Caucas<br>ian | Infections and<br>infestations/Periton<br>sillar<br>abscess/PERITON<br>SILLARY<br>ABSCESS                             | severe                     | NO/NO                                                   | 08JUN2008/10JUN2008<br>/ 229      | 3                        | dose not changed                | YES/YES                                                   | recovered/<br>resolved |
| 160927/<br>33/femal<br>e/Caucas<br>ian | Pregnancy,<br>puerperium and<br>perinatal<br>conditions/Blighte<br>d<br>ovum/BLIGHTED<br>OVUM                         | severe                     | NO/NO                                                   | 05JAN2010/11FEB2010<br>/ 807      | 38                       | drug withdrawn                  | YES/YES                                                   | recovered/<br>resolved |

Table 14.3.2 / 2: Serious adverse events - Subject listing (FAS) (cont.)

TREATMENT: LCS16

| Subject/<br>age/sex/r<br>ace           | Primary<br>SOC/preferred<br>term/AEX                                                                                           | AE<br>maximum<br>intensity | Related to study<br>drug/protocol-required<br>procedure | Onset date/stop<br>date/study day | AE<br>Duration<br>(days) | AE related study<br>drug action | AE related<br>drug<br>treatment/non<br>-drug<br>treatment | AE outcome             |
|----------------------------------------|--------------------------------------------------------------------------------------------------------------------------------|----------------------------|---------------------------------------------------------|-----------------------------------|--------------------------|---------------------------------|-----------------------------------------------------------|------------------------|
| 160978/<br>26/femal<br>e/Caucas<br>ian | General disorders<br>and administration<br>site<br>conditions/Device<br>dislocation/PARTI<br>AL<br>PERFORATION<br>(MYOMETRIUM) | moderate                   | YES/NO                                                  | 07DEC2009/13JAN201<br>0/ 722      | 38                       | drug withdrawn                  | NO/NO                                                     | recovered/<br>resolved |
| 161024/<br>34/femal<br>e/Caucas<br>ian | Infections and<br>infestations/Pelvic<br>inflammatory<br>disease/PELVIC<br>INFLAMMATOR<br>Y DISEASE                            | severe                     | YES/YES                                                 | 26NOV2007/10DEC200<br>7/ 1        | 15                       | drug withdrawn                  | YES/NO                                                    | recovered/<br>resolved |
| 161123/<br>23/femal<br>e/Caucas<br>ian | Ear and labyrinth<br>disorders/Vertigo/<br>VERTIGO                                                                             | severe                     | NO/NO                                                   | 18DEC2009/01JAN201<br>0/ 758      | 15                       | dose not changed                | YES/NO                                                    | recovered/<br>resolved |
| 161223/<br>28/femal<br>e/Caucas<br>ian | Injury, poisoning<br>and procedural<br>complications/Ten<br>don<br>rupture/ACHILLE<br>S TEND.<br>RUPTURE IN<br>LEFT. LEG       | severe                     | NO/NO                                                   | 18OCT2008/01DEC200<br>8/ 237      | 45                       | dose not changed                | YES/YES                                                   | recovered/<br>resolved |
|                                        | Nervous system<br>disorders/Dizziness<br>/DIZZINESS                                                                            | moderate                   | NO/NO                                                   | 27JUL2010/15OCT2010<br>/ 884      | 81                       | dose not changed                | NO/NO                                                     | recovered/<br>resolved |



Table 14.3.2 / 2: Serious adverse events - Subject listing (FAS) (cont.)

TREATMENT: LCS16

| Subject/<br>age/sex/r<br>ace           | Primary<br>SOC/preferred<br>term/AEX                                                                                                    | AE<br>maximum<br>intensity | Related to study<br>drug/protocol-required<br>procedure | Onset date/stop<br>date/study day | AE<br>Duration<br>(days) | AE related study<br>drug action | AE related<br>drug<br>treatment/non<br>-drug<br>treatment | AE outcome                     |
|----------------------------------------|-----------------------------------------------------------------------------------------------------------------------------------------|----------------------------|---------------------------------------------------------|-----------------------------------|--------------------------|---------------------------------|-----------------------------------------------------------|--------------------------------|
| 161306/<br>27/femal<br>e/Caucas<br>ian | Injury, poisoning<br>and procedural<br>complications/Ther<br>mal burn/BURN<br>INJURY IN BOTH<br>TIGHTS                                  | severe                     | NO/NO                                                   | 02JAN2009/19JAN2009<br>/ 460      | 18                       | dose not changed                | YES/YES                                                   | recovered/<br>resolved         |
| 161432/<br>22/femal<br>e/Caucas<br>ian | Psychiatric<br>disorders/Depressi<br>on/DEPRESSION,<br>WORSENER                                                                         | severe                     | NO/NO                                                   | 10OCT2010/ ./<br>971              | .                        | dose not changed                | YES/YES                                                   | not recovered/<br>not resolved |
| 180112/<br>33/femal<br>e/Caucas<br>ian | Gastrointestinal<br>disorders/Abdomin<br>al<br>pain/ABDOMINA<br>L PAIN                                                                  | moderate                   | YES/YES                                                 | 01JUN2009/04JUN2009<br>/ 546      | 4                        | drug withdrawn                  | NO/NO                                                     | recovered/<br>resolved         |
|                                        | Pregnancy,<br>puerperium and<br>perinatal<br>conditions/Abortio<br>n spontaneous<br>incomplete/INCO<br>MPLETE<br>SPONTANEUS<br>ABORTION | moderate                   | YES/YES                                                 | 01JUN2009/04JUN2009<br>/ 546      | 4                        | drug withdrawn                  | YES/NO                                                    | recovered/<br>resolved         |
| 180117/<br>33/femal<br>e/Caucas<br>ian | Gastrointestinal<br>disorders/Abdomin<br>al<br>pain/ABDOMINA<br>L PAIN                                                                  | moderate                   | NO/NO                                                   | 14JUL2010/11AUG201<br>0/ 929      | 29                       | dose not changed                | NO/YES                                                    | recovered/<br>resolved         |

Table 14.3.2 / 2: Serious adverse events - Subject listing (FAS) (cont.)

TREATMENT: LCS16

| Subject/<br>age/sex/r<br>ace           | Primary<br>SOC/preferred<br>term/AEX                                                                                                                                                               | AE<br>maximum<br>intensity | Related to study<br>drug/protocol-required<br>procedure | Onset date/stop<br>date/study day | AE<br>Duration<br>(days) | AE related study<br>drug action | AE related<br>drug<br>treatment/non<br>-drug<br>treatment | AE outcome             |
|----------------------------------------|----------------------------------------------------------------------------------------------------------------------------------------------------------------------------------------------------|----------------------------|---------------------------------------------------------|-----------------------------------|--------------------------|---------------------------------|-----------------------------------------------------------|------------------------|
|                                        | Reproductive<br>system and breast<br>disorders/Pelvic<br>adhesions/PELVIC<br>ADHESIONS                                                                                                             | moderate                   | NO/NO                                                   | 14JUL2010/11AUG201<br>0/ 929      | 29                       | dose not changed                | NO/YES                                                    | recovered/<br>resolved |
| 180317/<br>33/femal<br>e/Caucas<br>ian | Pregnancy,<br>puerperium and<br>perinatal<br>conditions/Ectopic<br>pregnancy/LEFT<br>TUBAL<br>EXTRAUTERIN<br>PREGNANCY                                                                             | severe                     | YES/YES                                                 | 03JAN2009/05JAN2009<br>/ 409      | 3                        | drug withdrawn                  | NO/YES                                                    | recovered/<br>resolved |
| 180422/<br>33/femal<br>e/Caucas<br>ian | Neoplasms benign,<br>malignant and<br>unspecified (incl<br>cysts and<br>polyps)/Ovarian<br>germ cell teratoma<br>benign/WORSENI<br>NG OF PRE-<br>EXISTING<br>DERMOID CYST<br>OF THE RIGHT<br>OVARY | mild                       | NO/NO                                                   | 15JAN2008/19JAN2008<br>/ 37       | 5                        | dose not changed                | NO/YES                                                    | recovered/<br>resolved |
| 180521/<br>35/femal<br>e/Caucas<br>ian | Reproductive<br>system and breast<br>disorders/Vaginal<br>perforation/RUPT<br>URA FORNIC<br>VAGINAL<br>POSTERIOR                                                                                   | mild                       | NO/NO                                                   | 14DEC2009/15DEC200<br>9/ 690      | 2                        | dose not changed                | YES/YES                                                   | recovered/<br>resolved |

Table 14.3.2 / 2: Serious adverse events - Subject listing (FAS) (cont.)

TREATMENT: LCS16

| Subject/<br>age/sex/r<br>ace           | Primary<br>SOC/preferred<br>term/AEX                                                                              | AE<br>maximum<br>intensity | Related to study<br>drug/protocol-required<br>procedure | Onset date/stop<br>date/study day | AE<br>Duration<br>(days) | AE related study<br>drug action | AE related<br>drug<br>treatment/non<br>-drug<br>treatment | AE outcome                     |
|----------------------------------------|-------------------------------------------------------------------------------------------------------------------|----------------------------|---------------------------------------------------------|-----------------------------------|--------------------------|---------------------------------|-----------------------------------------------------------|--------------------------------|
| 180629/<br>29/femal<br>e/Caucas<br>ian | Cardiac<br>disorders/Mitral<br>valve<br>prolapse/MITRAL<br>PROLAPSE                                               | mild                       | NO/NO                                                   | 12MAR2008/<br>98 /                | .                        | dose not changed                | NO/NO                                                     | not recovered/<br>not resolved |
|                                        | Cardiac<br>disorders/Sinus<br>tachycardia/SINUS<br>TARCHYCARDI<br>A                                               | moderate                   | NO/NO                                                   | 12MAR2008/19MAR20<br>08/ 98       | 8                        | dose not changed                | YES/NO                                                    | recovered/<br>resolved         |
|                                        | Infections and<br>infestations/Pelvic<br>inflammatory<br>disease/PELVIC<br>INFLAMMATO<br>RY DISEASE               | mild                       | YES/YES                                                 | 27MAR2008/03APR200<br>8/ 113      | 8                        | drug withdrawn                  | YES/YES                                                   | recovered/<br>resolved         |
| 180659/<br>34/femal<br>e/Caucas<br>ian | Injury, poisoning<br>and procedural<br>complications/Foot<br>fracture/MEDIAL<br>SESAME BONE<br>FRACTURE<br>FOOT   | severe                     | NO/NO                                                   | 22SEP2008/25OCT2008<br>/ 236      | 34                       | dose not changed                | YES/NO                                                    | recovered/<br>resolved         |
|                                        | Injury, poisoning<br>and procedural<br>complications/Foot<br>fracture/SESAME<br>BONE<br>FRACTURE LEFT<br>LEG FOOT | severe                     | NO/NO                                                   | 15NOV2008/05APR200<br>9/ 290      | 142                      | dose not changed                | YES/YES                                                   | recovered/<br>resolved         |

Table 14.3.2 / 2: Serious adverse events - Subject listing (FAS) (cont.)

TREATMENT: LCS16

| Subject/<br>age/sex/r<br>ace          | Primary<br>SOC/preferred<br>term/AEX                                                                                                                   | AE<br>maximum<br>intensity | Related to study<br>drug/protocol-required<br>procedure | Onset date/stop<br>date/study day | AE<br>Duration<br>(days) | AE related study<br>drug action | AE related<br>drug<br>treatment/non<br>-drug<br>treatment | AE outcome             |
|---------------------------------------|--------------------------------------------------------------------------------------------------------------------------------------------------------|----------------------------|---------------------------------------------------------|-----------------------------------|--------------------------|---------------------------------|-----------------------------------------------------------|------------------------|
|                                       | Musculoskeletal<br>and connective<br>tissue<br>disorders/Arthritis/<br>ARTHRITIS IN<br>THE<br>METACARPAL<br>JOINT OF THE<br>BIG TOE OF THE<br>LEFT LEG | severe                     | NO/NO                                                   | 22SEP2008/25OCT2008<br>/ 236      | 34                       | dose not changed                | YES/NO                                                    | recovered/<br>resolved |
|                                       | Nervous system<br>disorders/Sciatica/<br>LUMBOISCHIAL<br>GIA RIGHT SIDE                                                                                | mild                       | NO/NO                                                   | 22SEP2008/25OCT2008<br>/ 236      | 34                       | dose not changed                | NO/NO                                                     | recovered/<br>resolved |
| 190202/<br>35/femal<br>e/Hispan<br>ic | Infections and<br>infestations/Appen<br>dicitis/APPENDIC<br>ITIS                                                                                       | severe                     | NO/NO                                                   | 16JUN2008/18JUN2008<br>/ 137      | 3                        | dose not changed                | NO/YES                                                    | recovered/<br>resolved |
|                                       | Reproductive<br>system and breast<br>disorders/Ovarian<br>cyst<br>torsion/TWISTED<br>OVARIAN CYST                                                      | severe                     | NO/NO                                                   | 16JUN2008/18JUN2008<br>/ 137      | 3                        | dose not changed                | NO/YES                                                    | recovered/<br>resolved |
| 190622/<br>26/femal<br>e/Hispan<br>ic | Neoplasms benign,<br>malignant and<br>unspecified (incl<br>cysts and<br>polyps)/Teratoma<br>benign/BENIGN<br>TERATOMA                                  | mild                       | NO/NO                                                   | 28MAR2009/31MAR20<br>09/ 382      | 4                        | dose not changed                | NO/YES                                                    | recovered/<br>resolved |

Table 14.3.2 / 2: Serious adverse events - Subject listing (FAS) (cont.)

TREATMENT: LCS16

| Subject/<br>age/sex/r<br>ace           | Primary<br>SOC/preferred<br>term/AEX                                                                                                                                                | AE<br>maximum<br>intensity | Related to study<br>drug/protocol-required<br>procedure | Onset date/stop<br>date/study day | AE<br>Duration<br>(days) | AE related study<br>drug action | AE related<br>drug<br>treatment/non<br>-drug<br>treatment | AE outcome                                    |
|----------------------------------------|-------------------------------------------------------------------------------------------------------------------------------------------------------------------------------------|----------------------------|---------------------------------------------------------|-----------------------------------|--------------------------|---------------------------------|-----------------------------------------------------------|-----------------------------------------------|
| 200301/<br>18/femal<br>e/Caucas<br>ian | Reproductive<br>system and breast<br>disorders/Ovarian<br>cyst/CYSTE IN<br>THE LEFT<br>OVARY                                                                                        | severe                     | YES/NO                                                  | 19JUL2009/20JUL2009/<br>585       | 2                        | dose not changed                | NO/YES                                                    | recovered/<br>resolved                        |
| 200401/<br>31/femal<br>e/Caucas<br>ian | Infections and<br>infestations/Appen<br>dicitis/APPENDIC<br>ITIS ACUTA                                                                                                              | severe                     | NO/NO                                                   | 26AUG2009/10SEP200<br>9/ 591      | 16                       | dose not changed                | NO/YES                                                    | recovered/<br>resolved with<br>resid. effects |
| 200409/<br>24/femal<br>e/Caucas<br>ian | Neoplasms benign,<br>malignant and<br>unspecified (incl<br>cysts and<br>polyps)/Ovarian<br>germ cell teratoma<br>benign/OVARIAN<br>TUMOR LEFT<br>SIDE, BENIGN<br>MATURE<br>TERATOMA | moderate                   | NO/NO                                                   | 10JUN2008/25JUN2008<br>/ 93       | 16                       | dose not changed                | NO/YES                                                    | recovered/<br>resolved                        |
| 200509/<br>32/femal<br>e/Caucas<br>ian | Infections and<br>infestations/Sinusit<br>is/SINUSITIS<br>MAXILLARIS                                                                                                                | severe                     | NO/NO                                                   | 13DEC2010/ ./<br>1054             | .                        | dose not changed                | YES/YES                                                   | continuing<br>with change                     |
| 200609/<br>32/femal<br>e/Caucas<br>ian | Pregnancy,<br>puerperium and<br>perinatal<br>conditions/Ectopic<br>pregnancy/ECTOP<br>IC MASS<br>[ECTOPIC<br>PREGNANCY]                                                             | severe                     | YES/NO                                                  | 01DEC2009/21DEC200<br>9/ 699      | 21                       | drug withdrawn                  | YES/YES                                                   | recovered/<br>resolved                        |

Table 14.3.2 / 2: Serious adverse events - Subject listing (FAS) (cont.)

TREATMENT: LCS16

| Subject/<br>age/sex/r<br>ace           | Primary<br>SOC/preferred<br>term/AEX                                                                                          | AE<br>maximum<br>intensity | Related to study<br>drug/protocol-required<br>procedure | Onset date/stop<br>date/study day | AE<br>Duration<br>(days) | AE related study<br>drug action | AE related<br>drug<br>treatment/non<br>-drug<br>treatment | AE outcome                     |
|----------------------------------------|-------------------------------------------------------------------------------------------------------------------------------|----------------------------|---------------------------------------------------------|-----------------------------------|--------------------------|---------------------------------|-----------------------------------------------------------|--------------------------------|
| 210110/<br>23/femal<br>e/Caucas<br>ian | Skin and<br>subcutaneous<br>tissue<br>disorders/Urticaria/<br>URTICARIA                                                       | moderate                   | NO/NO                                                   | 15JUL2008/01DEC2008<br>/ 191      | 140                      | dose not changed                | YES/NO                                                    | recovered/<br>resolved         |
| 210112/<br>20/femal<br>e/Caucas<br>ian | Psychiatric<br>disorders/Complete<br>d suicide/SUICIDE                                                                        | severe                     | NO/NO                                                   | 15JUL2010/15JUL2010/<br>917       | 1                        | dose not changed                | NO/NO                                                     | fatal                          |
| 210604/<br>32/femal<br>e/Caucas<br>ian | Neoplasms benign,<br>malignant and<br>unspecified (incl<br>cysts and<br>polyps)/Pancreatic<br>carcinoma/CANCE<br>R PANCREATIS | severe                     | NO/NO                                                   | 28JAN2009/<br>332                 | .                        | dose not changed                | YES/YES                                                   | not recovered/<br>not resolved |
| 230203/<br>24/femal<br>e/Caucas<br>ian | Nervous system<br>disorders/Dizziness<br>/DIZZINESS                                                                           | moderate                   | NO/NO                                                   | 02APR2008/<br>175                 | .                        | dose not changed                | NO/NO                                                     | continuing<br>with change      |
| 230215/<br>31/femal<br>e/Caucas<br>ian | Infections and<br>infestations/Campy<br>lobacter intestinal<br>infection/ENTERI<br>TIS DUE TO<br>CAMPYLOBACT<br>INFECTION     | severe                     | NO/NO                                                   | 07MAR2008/13MAR20<br>08/ 39       | 7                        | dose not changed                | YES/NO                                                    | recovered/<br>resolved         |

Table 14.3.2 / 2: Serious adverse events - Subject listing (FAS) (cont.)

TREATMENT: LCS16

| Subject/<br>age/sex/r<br>ace           | Primary<br>SOC/preferred<br>term/AEX                                                                                                                      | AE<br>maximum<br>intensity | Related to study<br>drug/protocol-required<br>procedure | Onset date/stop<br>date/study day | AE<br>Duration<br>(days) | AE related study<br>drug action | AE related<br>drug<br>treatment/non<br>-drug<br>treatment | AE outcome                |
|----------------------------------------|-----------------------------------------------------------------------------------------------------------------------------------------------------------|----------------------------|---------------------------------------------------------|-----------------------------------|--------------------------|---------------------------------|-----------------------------------------------------------|---------------------------|
| 230309/<br>28/femal<br>e/Caucas<br>ian | Neoplasms benign,<br>malignant and<br>unspecified (incl<br>cysts and<br>polyps)/Cervix<br>carcinoma stage<br>0/CARCINOMA<br>IN SITU<br>CERVICIS<br>UTERI. | severe                     | NO/NO                                                   | 03MAR2010/<br>749                 | .                        | drug withdrawn                  | YES/YES                                                   | recovering/<br>resolving  |
| 230506/<br>33/femal<br>e/Caucas<br>ian | Gastrointestinal<br>disorders/Abdomin<br>al<br>pain/ABDOMINA<br>L PAIN                                                                                    | moderate                   | YES/NO                                                  | 10MAR2008/11MAR20<br>08/ 119      | 2                        | dose not changed                | YES/NO                                                    | recovered/<br>resolved    |
| 230601/<br>20/femal<br>e/Caucas<br>ian | Psychiatric<br>disorders/Panic<br>disorder/PANIC<br>SYNDROME                                                                                              | severe                     | NO/NO                                                   | 08AUG2008/09AUG20<br>08/ 254      | 2                        | dose not changed                | YES/NO                                                    | recovered/<br>resolved    |
| 230612/<br>29/femal<br>e/Caucas<br>ian | Injury, poisoning<br>and procedural<br>complications/Proc<br>edural<br>pain/ABDOMINA<br>L PAIN AFTER<br>GALL BLADDER<br>SURGERY                           | severe                     | NO/NO                                                   | 06MAR2008/07MAR20<br>08/ 71       | 2                        | dose not changed                | NO/YES                                                    | recovered/<br>resolved    |
| 240127/<br>33/femal<br>e/Asian         | Nervous system<br>disorders/Headache<br>/HEADACHE                                                                                                         | mild                       | NO/NO                                                   | 06JAN2011/<br>1037                | .                        | drug withdrawn                  | YES/NO                                                    | continuing<br>with change |

Table 14.3.2 / 2: Serious adverse events - Subject listing (FAS) (cont.)

TREATMENT: LCS16

| Subject/<br>age/sex/r<br>ace   | Primary<br>SOC/preferred<br>term/AEX                                                                           | AE<br>maximum<br>intensity | Related to study<br>drug/protocol-required<br>procedure | Onset date/stop<br>date/study day | AE<br>Duration<br>(days) | AE related study<br>drug action | AE related<br>drug<br>treatment/non<br>-drug<br>treatment | AE outcome                     |
|--------------------------------|----------------------------------------------------------------------------------------------------------------|----------------------------|---------------------------------------------------------|-----------------------------------|--------------------------|---------------------------------|-----------------------------------------------------------|--------------------------------|
|                                | Nervous system<br>disorders/Paraesthesia/PARATHESIAS                                                           | severe                     | NO/NO                                                   | 06JAN2011/<br>1037                | .                        | drug withdrawn                  | YES/NO                                                    | continuing<br>with change      |
| 240905/<br>33/female/Asian     | Infections and<br>infestations/Appen<br>dicitis/ACUTE<br>APPENDICITIS                                          | severe                     | NO/NO                                                   | 13APR2011/14APR201<br>1/ 1085     | 2                        | dose not changed                | YES/YES                                                   | recovered/<br>resolved         |
| 241412/<br>32/female/Caucasian | Respiratory,<br>thoracic and<br>mediastinal<br>disorders/Asthma/<br>ASTHMA                                     | severe                     | NO/NO                                                   | 15NOV2010/<br>988                 | .                        | dose not changed                | YES/NO                                                    | not recovered/<br>not resolved |
|                                | Respiratory,<br>thoracic and<br>mediastinal<br>disorders/Dyspnoea/SHORTNESS<br>OF BREATH                       | severe                     | NO/NO                                                   | 14NOV2010/30NOV20<br>10/ 987      | 17                       | dose not changed                | YES/NO                                                    | recovered/<br>resolved         |
|                                | Respiratory,<br>thoracic and<br>mediastinal<br>disorders/Hypoxia/<br>HYPOXEMIA                                 | moderate                   | NO/NO                                                   | 28NOV2010/30NOV20<br>10/ 1001     | 3                        | dose not changed                | NO/NO                                                     | recovered/<br>resolved         |
| 241511/<br>28/female/Hispanic  | Reproductive<br>system and breast<br>disorders/Ovarian<br>cyst<br>ruptured/RIGHT<br>OVARIAN CYST<br>- RUPTURE. | severe                     | NO/NO                                                   | 09SEP2008/11SEP2008/<br>300       | 3                        | dose not changed                | YES/NO                                                    | recovered/<br>resolved         |



Table 14.3.2 / 2: Serious adverse events - Subject listing (FAS) (cont.)

TREATMENT: LCS16

| Subject/<br>age/sex/r<br>ace           | Primary<br>SOC/preferred<br>term/AEX                                                                                               | AE<br>maximum<br>intensity | Related to study<br>drug/protocol-required<br>procedure | Onset date/stop<br>date/study day | AE<br>Duration<br>(days) | AE related study<br>drug action | AE related<br>drug<br>treatment/non<br>-drug<br>treatment | AE outcome                |
|----------------------------------------|------------------------------------------------------------------------------------------------------------------------------------|----------------------------|---------------------------------------------------------|-----------------------------------|--------------------------|---------------------------------|-----------------------------------------------------------|---------------------------|
|                                        | Reproductive<br>system and breast<br>disorders/Ovarian<br>cyst/COMPLEX<br>LEFT OVARIAN<br>CYST 2.4CM                               | mild                       | NO/NO                                                   | 09SEP2008/<br>300 /               | .                        | dose not changed                | NO/NO                                                     | continuing<br>with change |
| 241546/<br>30/femal<br>e/Black         | Gastrointestinal<br>disorders/Abdomin<br>al<br>pain/ABDOMINA<br>L PAIN                                                             | severe                     | NO/NO                                                   | 10JUN2010/11JUN2010<br>/ 753      | 2                        | dose not changed                | YES/NO                                                    | recovered/<br>resolved    |
| 241603/<br>23/femal<br>e/Black         | Injury, poisoning<br>and procedural<br>complications/Proc<br>edural pain/POST -<br>OPERATIVE<br>PAIN                               | severe                     | NO/NO                                                   | 19MAY2009/30SEP200<br>9/ 436      | 135                      | dose not changed                | YES/NO                                                    | recovered/<br>resolved    |
|                                        | Injury, poisoning<br>and procedural<br>complications/Proc<br>edural pain/[POST-<br>OPERATIVE<br>PAIN AFTER<br>ELECTIVE<br>SURGERY] | severe                     | NO/NO                                                   | 24NOV2009/30JUL201<br>0/ 625      | 249                      | dose not changed                | YES/YES                                                   | recovered/<br>resolved    |
| 241726/<br>28/femal<br>e/Caucas<br>ian | Hepatobiliary<br>disorders/Cholelith<br>iasis/CHOLELITH<br>IASIS                                                                   | severe                     | NO/NO                                                   | 23APR2009/<br>402 /               | .                        | dose not changed                | YES/YES                                                   | continuing<br>with change |

Table 14.3.2 / 2: Serious adverse events - Subject listing (FAS) (cont.)

TREATMENT: LCS16

| Subject/<br>age/sex/r<br>ace           | Primary<br>SOC/preferred<br>term/AEX                                                                                         | AE<br>maximum<br>intensity | Related to study<br>drug/protocol-required<br>procedure | Onset date/stop<br>date/study day | AE<br>Duration<br>(days) | AE related study<br>drug action | AE related<br>drug<br>treatment/non<br>-drug<br>treatment | AE outcome                |
|----------------------------------------|------------------------------------------------------------------------------------------------------------------------------|----------------------------|---------------------------------------------------------|-----------------------------------|--------------------------|---------------------------------|-----------------------------------------------------------|---------------------------|
| 242321/<br>31/femal<br>e/other         | Investigations/Hae<br>moglobin<br>decreased/DECRE<br>ASED<br>HEMOGLOBIN                                                      | severe                     | NO/NO                                                   | 02JUL2010/<br>803                 | .                        | drug withdrawn                  | YES/NO                                                    | continuing<br>with change |
|                                        | Pregnancy,<br>puerperium and<br>perinatal<br>conditions/Rupture<br>d ectopic<br>pregnancy/ECTOP<br>IC PREGNANCY-<br>RUPTURED | severe                     | YES/NO                                                  | 02JUL2010/02JUL2010/<br>803       | 1                        | drug withdrawn                  | YES/YES                                                   | recovered/<br>resolved    |
| 242704/<br>19/femal<br>e/Caucas<br>ian | Infections and<br>infestations/Viral<br>infection/VIRAL<br>SYNDROME                                                          | severe                     | NO/NO                                                   | 29MAR2009/06APR200<br>9/ 384      | 9                        | drug withdrawn                  | YES/NO                                                    | recovered/<br>resolved    |
| 243011/<br>24/femal<br>e/Caucas<br>ian | Hepatobiliary<br>disorders/Cholecys<br>titis/CHOLECYST<br>ITIS                                                               | severe                     | NO/NO                                                   | 23MAR2009/27MAR20<br>09/ 427      | 5                        | dose not changed                | YES/YES                                                   | recovered/<br>resolved    |
| 243027/<br>35/femal<br>e/Caucas<br>ian | Infections and<br>infestations/Celluli<br>tis/LEFT HAND<br>CELLULITIS                                                        | severe                     | NO/NO                                                   | 01MAY2009/<br>353                 | .                        | dose not changed                | YES/YES                                                   | continuing<br>with change |
| 243205/<br>26/femal<br>e/Caucas<br>ian | Infections and<br>infestations/Appen<br>dicitis/APPENDIC<br>ITIS                                                             | severe                     | NO/NO                                                   | 20MAR2009/21MAR20<br>09/ 446      | 2                        | dose not changed                | YES/YES                                                   | recovered/<br>resolved    |

Table 14.3.2 / 2: Serious adverse events - Subject listing (FAS) (cont.)

TREATMENT: LCS16

| Subject/<br>age/sex/r<br>ace           | Primary<br>SOC/preferred<br>term/AEX                                                                       | AE<br>maximum<br>intensity | Related to study<br>drug/protocol-required<br>procedure | Onset date/stop<br>date/study day | AE<br>Duration<br>(days) | AE related study<br>drug action | AE related<br>drug<br>treatment/non<br>-drug<br>treatment | AE outcome                     |
|----------------------------------------|------------------------------------------------------------------------------------------------------------|----------------------------|---------------------------------------------------------|-----------------------------------|--------------------------|---------------------------------|-----------------------------------------------------------|--------------------------------|
| 243228/<br>23/femal<br>e/Caucas<br>ian | Pregnancy,<br>puerperium and<br>perinatal<br>conditions/Ectopic<br>pregnancy/RIGHT<br>ECTOPIC<br>PREGNANCY | severe                     | YES/NO                                                  | 29APR2009/30APR200<br>9/ 345      | 2                        | drug withdrawn                  | NO/YES                                                    | recovered/<br>resolved         |
| 243707/<br>34/femal<br>e/Hispan<br>ic  | Hepatobiliary<br>disorders/Cholecys<br>titis/CHOLECYST<br>ITIS                                             | moderate                   | NO/NO                                                   | 01JUL2010/03JUL2010/<br>870       | 3                        | dose not changed                | NO/YES                                                    | recovered/<br>resolved         |
|                                        | Hepatobiliary<br>disorders/Cholelith<br>iasis/CHOLELITH<br>IASIS                                           | moderate                   | NO/NO                                                   | 01JUL2010/03JUL2010/<br>870       | 3                        | dose not changed                | NO/YES                                                    | recovered/<br>resolved         |
| 243932/<br>29/femal<br>e/Caucas<br>ian | Pregnancy,<br>puerperium and<br>perinatal<br>conditions/Ectopic<br>pregnancy/ECTOP<br>IC PREGNANCY         | moderate                   | YES/NO                                                  | 15MAR2011/02JUN201<br>1/ 1119     | 80                       | drug withdrawn                  | YES/NO                                                    | recovered/<br>resolved         |
| 243937/<br>27/femal<br>e/Caucas<br>ian | Endocrine<br>disorders/Goitre/W<br>ORSENING OF<br>PRE EXISTING<br>GOITER                                   | moderate                   | NO/NO                                                   | 18APR2008/18APR200<br>8/ 43       | 1                        | dose not changed                | NO/YES                                                    | recovered/<br>resolved         |
| 243975/<br>24/femal<br>e/Caucas<br>ian | Gastrointestinal<br>disorders/Salivary<br>gland<br>calculus/SIALOLI<br>THIASIS                             | severe                     | NO/NO                                                   | 25JUL2008/ ./<br>68               | .                        | dose not changed                | NO/NO                                                     | not recovered/<br>not resolved |

Table 14.3.2 / 2: Serious adverse events - Subject listing (FAS) (cont.)

TREATMENT: LCS16

| Subject/<br>age/sex/r<br>ace           | Primary<br>SOC/preferred<br>term/AEX                                                          | AE<br>maximum<br>intensity | Related to study<br>drug/protocol-required<br>procedure | Onset date/stop<br>date/study day | AE<br>Duration<br>(days) | AE related study<br>drug action | AE related<br>drug<br>treatment/non<br>-drug<br>treatment | AE outcome                |
|----------------------------------------|-----------------------------------------------------------------------------------------------|----------------------------|---------------------------------------------------------|-----------------------------------|--------------------------|---------------------------------|-----------------------------------------------------------|---------------------------|
|                                        | Gastrointestinal<br>disorders/Salivary<br>gland<br>calculus/WORSEN<br>IG OF<br>SIALOLITHIASIS | severe                     | NO/NO                                                   | 28JUL2008/<br>71 /                | .                        | dose not changed                | NO/NO                                                     | continuing<br>with change |
| 244305/<br>35/femal<br>e/Caucas<br>ian | Infections and<br>infestations/Pneum<br>onia/PNEUMONI<br>A                                    | moderate                   | NO/NO                                                   | 14APR2008/29APR200<br>8/ 75       | 16                       | dose not changed                | YES/NO                                                    | recovered/<br>resolved    |
| 244424/<br>26/femal<br>e/Caucas<br>ian | Psychiatric<br>disorders/Affective<br>disorder/MOOD<br>DISORDER                               | severe                     | NO/NO                                                   | 02AUG2009/<br>516 /               | .                        | dose not changed                | YES/NO                                                    | continuing<br>with change |
|                                        | Psychiatric<br>disorders/Alcoholis<br>m/ALCOHOL<br>DEPENDENCE                                 | severe                     | NO/NO                                                   | 24AUG2009/<br>538 /               | .                        | dose not changed                | NO/YES                                                    | continuing<br>with change |
|                                        | Psychiatric<br>disorders/Bipolar<br>disorder/BIPOLAR<br>DISORDER                              | severe                     | NO/NO                                                   | 24AUG2009/<br>538 /               | .                        | dose not changed                | YES/YES                                                   | continuing<br>with change |
|                                        | Psychiatric<br>disorders/Drug<br>dependence/COCA<br>INE<br>DEPENDENCE                         | severe                     | NO/NO                                                   | 24AUG2009/<br>538 /               | .                        | dose not changed                | NO/YES                                                    | continuing<br>with change |

Table 14.3.2 / 2: Serious adverse events - Subject listing (FAS) (cont.)

TREATMENT: LCS16

| Subject/<br>age/sex/r<br>ace           | Primary<br>SOC/preferred<br>term/AEX                                                                           | AE<br>maximum<br>intensity | Related to study<br>drug/protocol-required<br>procedure | Onset date/stop<br>date/study day | AE<br>Duration<br>(days) | AE related study<br>drug action | AE related<br>drug<br>treatment/non<br>-drug<br>treatment | AE outcome                |
|----------------------------------------|----------------------------------------------------------------------------------------------------------------|----------------------------|---------------------------------------------------------|-----------------------------------|--------------------------|---------------------------------|-----------------------------------------------------------|---------------------------|
|                                        | Psychiatric<br>disorders/Polysubst<br>ance<br>dependence/POLY<br>SUBSTANCE<br>DEPENDENCE                       | severe                     | NO/NO                                                   | 02AUG2009/<br>516                 | .                        | dose not changed                | NO/NO                                                     | continuing<br>with change |
|                                        | Surgical and<br>medical<br>procedures/Detoxif<br>ication/DETOX<br>ADMISSION                                    | severe                     | NO/NO                                                   | 15JUL2009/01JUL2009/<br>498       | -13                      | dose not changed                | ./.                                                       | recovered/<br>resolved    |
| 244433/<br>28/femal<br>e/other         | Infections and<br>infestations/Appen<br>dicitis/ACUTE<br>APPENDICITIS                                          | severe                     | NO/NO                                                   | 03OCT2008/05OCT200<br>8/ 185      | 3                        | dose not changed                | YES/YES                                                   | recovered/<br>resolved    |
| 244519/<br>25/femal<br>e/Caucas<br>ian | Pregnancy,<br>puerperium and<br>perinatal<br>conditions/Ectopic<br>pregnancy/POSSIB<br>LE ECTOPIC<br>PREGNANCY | mild                       | YES/NO                                                  | 17JUN2010/20JUN2010<br>/ 799      | 4                        | drug withdrawn                  | YES/YES                                                   | recovered/<br>resolved    |
| 244706/<br>34/femal<br>e/Black         | Immune system<br>disorders/Anaphyla<br>ctic<br>reaction/ANAPHY<br>LACTIC<br>REACTION (TO<br>SHELL FISH)        | severe                     | NO/NO                                                   | 02SEP2010/02SEP2010/<br>912       | 1                        | dose not changed                | YES/NO                                                    | recovered/<br>resolved    |
| 244801/<br>20/femal<br>e/Black         | Gastrointestinal<br>disorders/Dysphagi<br>a/DYSPHAGIA                                                          | severe                     | NO/NO                                                   | 18AUG2009/19AUG20<br>09/ 492      | 2                        | dose not changed                | YES/YES                                                   | recovered/<br>resolved    |

Table 14.3.2 / 2: Serious adverse events - Subject listing (FAS) (cont.)

TREATMENT: LCS16

| Subject/<br>age/sex/r<br>ace           | Primary<br>SOC/preferred<br>term/AEX                                    | AE<br>maximum<br>intensity | Related to study<br>drug/protocol-required<br>procedure | Onset date/stop<br>date/study day | AE<br>Duration<br>(days) | AE related study<br>drug action | AE related<br>drug<br>treatment/non<br>-drug<br>treatment | AE outcome             |
|----------------------------------------|-------------------------------------------------------------------------|----------------------------|---------------------------------------------------------|-----------------------------------|--------------------------|---------------------------------|-----------------------------------------------------------|------------------------|
|                                        | Gastrointestinal<br>disorders/Odynoph<br>agia/ODYNOPHA<br>GIA           | severe                     | NO/NO                                                   | 18AUG2009/19AUG20<br>09/ 492      | 2                        | dose not changed                | YES/YES                                                   | recovered/<br>resolved |
| 245427/<br>24/femal<br>e/Caucas<br>ian | Infections and<br>infestations/Menin<br>gitis viral/VIRAL<br>MENINGITIS | severe                     | NO/NO                                                   | 30APR2011/06MAY20<br>11/ 1088     | 7                        | dose not changed                | YES/NO                                                    | recovered/<br>resolved |
| 245805/<br>19/femal<br>e/Caucas<br>ian | Infections and<br>infestations/Appen<br>dicitis/APPENDIC<br>ITIS        | severe                     | NO/NO                                                   | 13JUN2010/18JUN2010<br>/ 776      | 6                        | dose not changed                | YES/YES                                                   | recovered/<br>resolved |
| 245905/<br>33/femal<br>e/Caucas<br>ian | Gastrointestinal<br>disorders/Rectal<br>haemorrhage/REC<br>TAL BLEEDING | moderate                   | NO/NO                                                   | 07FEB2009/09FEB2009<br>/ 325      | 3                        | dose not changed                | YES/NO                                                    | recovered/<br>resolved |
|                                        | Nervous system<br>disorders/Convulsi<br>on/SEIZURE                      | moderate                   | NO/NO                                                   | 07FEB2009/07FEB2009<br>/ 325      | 1                        | dose not changed                | NO/NO                                                     | recovered/<br>resolved |

Note: AEX=adverse event verbatim investigator term. SOC=System Organ Class.

 Note: Study day is calculated from the first day of study drug administration. The formula for this calculation is:  
 (onset day of AE minus medication day) plus 1 day.

Note: Dictionary/ MedDRA Version 14.0

Global Biostatistics: /by-sasp/patdb/projects/de04209/310442/stat/prod\_interim03/pgms/t-sae.sas epkll 12OCT2011 11:27

End of table

### 14.3.3 Pregnancies (see efficacy)
