# Supplementary material for: The Effect of Age, Parity and Body Mass Index on the Efficacy, Safety, Placement and User Satisfaction Associated With Two Low-Dose Levonorgestrel Intrauterine Contraceptive Systems: Subgroup Analyses of Data From a Phase III Trial
Source: PLOS journal article supplement (doi:10.1371/journal.pone.0135309), 2015-09-17
Supplement: S3 (10.1371/journal.pone.0135309.s003) [file journal.pone.0135309.s003]

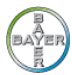

## Table of contents

|                                                                                                                                                                                             |    |
|---------------------------------------------------------------------------------------------------------------------------------------------------------------------------------------------|----|
| Table /1: Sound depth of the uterus by treatment and parity (FAS) .....                                                                                                                     | 2  |
| Table /2: Reasons for premature discontinuation by type of prior births (parous women only) - FAS .....                                                                                     | 3  |
| Table /3: Number of successful first insertion by treatment and parity (FAS) .....                                                                                                          | 4  |
| Table /4: Number of successful first insertion by treatment and type of prior births (parous women only) (FAS).....                                                                         | 5  |
| Table /5: Number of successful second insertion by treatment and parity (FAS) .....                                                                                                         | 6  |
| Table /6: Number of successful second insertion by treatment and type of prior births (parous women only) (FAS).....                                                                        | 7  |
| Table /7: Investigator's evaluation of IUS insertion procedure by parity (0 births vs. 1 or more) and treatment (FAS).....                                                                  | 8  |
| Table /8: Investigator's evaluation of IUS insertion procedure and type of prior births (parous women only) and treatment (FAS).....                                                        | 9  |
| Table /9: Subject's evaluation of pain during IUS insertion procedure by parity (0 births vs. 1 or more) and treatment (FAS) .....                                                          | 10 |
| Table /10: Subject's evaluation of pain during IUS insertion procedure by type of prior births (parous women only) and treatment (FAS).....                                                 | 11 |
| Table /11: Number of subjects with dilatation performed including 'when' by parity and treatment (FAS).....                                                                                 | 12 |
| Table /12: Number of subjects with dilatation performed including 'when' by type of prior births (parous women only) (FAS).....                                                             | 13 |
| Table /13: Number of subjects who prematurely discontinued the study medication (including main reason) after randomization by treatment and year (all randomized subjects) .....           | 14 |
| Table /14: Number of subjects who prematurely discontinued the study medication (including main reason) after randomization by treatment, year and parity (all randomized subjects).....    | 18 |
| Table /15: Number of subjects who prematurely discontinued the study medication (including main reason) after randomization by treatment, year and age group (all randomized subjects)..... | 22 |
| Table /16: Reasons for premature discontinuation by parity - FAS .....                                                                                                                      | 26 |
| Table /17: Reasons for premature discontinuation by age group - FAS .....                                                                                                                   | 27 |
| Table /18: Reason for discontinuation of study medication due to withdrawal of consent or AE by treatment and parity status (FAS).....                                                      | 28 |
| Table /19: Reason for discontinuation of study medication due to withdrawal of consent or AE by treatment and age group (FAS) .....                                                         | 29 |
| Table /20: User satisfaction questionnaire by parity (FAS).....                                                                                                                             | 30 |
| Table /21: User satisfaction questionnaire by age group (FAS) .....                                                                                                                         | 34 |

**Table /1: Sound depth of the uterus by treatment and parity (FAS)**

| Parity          |              |      | TREATMENT | n    | Nmiss | Mean | SD   | Min | Q1   | Median | Q3   | Max  |
|-----------------|--------------|------|-----------|------|-------|------|------|-----|------|--------|------|------|
| 0 births        | Uterus depth | (cm) | LCS12     | 555  | 1     | 6.97 | 0.76 | 2.0 | 6.50 | 7.00   | 7.50 | 9.0  |
|                 |              |      | LCS16     | 572  | 2     | 6.93 | 0.79 | 2.0 | 6.50 | 7.00   | 7.00 | 10.0 |
|                 |              |      | Total     | 1127 | 3     | 6.95 | 0.77 | 2.0 | 6.50 | 7.00   | 7.20 | 10.0 |
| 1 birth or more | Uterus depth | (cm) | LCS12     | 871  | 5     | 7.46 | 0.91 | 3.2 | 7.00 | 7.50   | 8.00 | 11.0 |
|                 |              |      | LCS16     | 878  | 0     | 7.43 | 0.93 | 3.0 | 7.00 | 7.50   | 8.00 | 11.0 |
|                 |              |      | Total     | 1749 | 5     | 7.44 | 0.92 | 3.0 | 7.00 | 7.50   | 8.00 | 11.0 |

Bayer: /by-sasp/patdb/projects/de04209/310442/stat/test\_query06/pgms/t-ius01-soundparity.sas sgrpp 14JUL2015 13:50  
 End of table

**Table /2: Reasons for premature discontinuation by type of prior births (parous women only) - FAS**

| Cesarian section |                                          | LCS12        | LCS16        | Total         |
|------------------|------------------------------------------|--------------|--------------|---------------|
| only             | n                                        |              |              |               |
| no               | n                                        | 688 (100.0%) | 709 (100.0%) | 1397 (100.0%) |
|                  | Study medication, administration status  |              |              |               |
|                  | missing                                  | 1 ( 0.1%)    | 0            | 1 ( <0.1%)    |
|                  | pat. lost, no further information avail. | 1 ( 0.1%)    | 0            | 1 ( <0.1%)    |
|                  | study medication never administered      | 0            | 0            | 0             |
|                  | other                                    | 0            | 0            | 0             |
|                  | completed                                | 407 ( 59.2%) | 72 ( 10.2%)  | 479 ( 34.3%)  |
|                  | prematurely discontinued                 | 280 ( 40.7%) | 278 ( 39.2%) | 558 ( 39.9%)  |
|                  | withdrawal of consent                    | 12 ( 1.7%)   | 14 ( 2.0%)   | 26 ( 1.9%)    |
|                  | protocol deviation                       | 8 ( 1.2%)    | 9 ( 1.3%)    | 17 ( 1.2%)    |
|                  | adverse event                            | 126 ( 18.3%) | 129 ( 18.2%) | 255 ( 18.3%)  |
|                  | pat. lost, no further information avail. | 42 ( 6.1%)   | 33 ( 4.7%)   | 75 ( 5.4%)    |
|                  | pregnancy                                | 5 ( 0.7%)    | 6 ( 0.8%)    | 11 ( 0.8%)    |
|                  | wish for pregnancy                       | 57 ( 8.3%)   | 62 ( 8.7%)   | 119 ( 8.5%)   |
|                  | other                                    | 30 ( 4.4%)   | 25 ( 3.5%)   | 55 ( 3.9%)    |
|                  | ongoing                                  | 0            | 359 ( 50.6%) | 359 ( 25.7%)  |
| yes              | n                                        | 188 (100.0%) | 169 (100.0%) | 357 (100.0%)  |
|                  | Study medication, administration status  |              |              |               |
|                  | missing                                  | 0            | 0            | 0             |
|                  | pat. lost, no further information avail. | 0            | 0            | 0             |
|                  | study medication never administered      | 0            | 1 ( 0.6%)    | 1 ( 0.3%)     |
|                  | other                                    | 0            | 1 ( 0.6%)    | 1 ( 0.3%)     |
|                  | completed                                | 110 ( 58.5%) | 19 ( 11.2%)  | 129 ( 36.1%)  |
|                  | prematurely discontinued                 | 78 ( 41.5%)  | 63 ( 37.3%)  | 141 ( 39.5%)  |
|                  | withdrawal of consent                    | 4 ( 2.1%)    | 5 ( 3.0%)    | 9 ( 2.5%)     |
|                  | protocol deviation                       | 3 ( 1.6%)    | 2 ( 1.2%)    | 5 ( 1.4%)     |
|                  | adverse event                            | 42 ( 22.3%)  | 31 ( 18.3%)  | 73 ( 20.4%)   |
|                  | pat. lost, no further information avail. | 9 ( 4.8%)    | 7 ( 4.1%)    | 16 ( 4.5%)    |
|                  | pregnancy                                | 0            | 1 ( 0.6%)    | 1 ( 0.3%)     |
|                  | wish for pregnancy                       | 16 ( 8.5%)   | 11 ( 6.5%)   | 27 ( 7.6%)    |
|                  | other                                    | 4 ( 2.1%)    | 6 ( 3.6%)    | 10 ( 2.8%)    |
|                  | ongoing                                  | 0            | 86 ( 50.9%)  | 86 ( 24.1%)   |

 Bayer: /by-sasp/patdb/projects/de04209/310442/stat/test\_query06/pgms/t-eosm-dis-ces.sas sgrpp 14JUL2015 13:51  
 End of table

**Table /3: Number of successful first insertion by treatment and parity (FAS)**

| Parity          |                         | LCS12        | LCS16         | Total         |
|-----------------|-------------------------|--------------|---------------|---------------|
| 0 births        | Number of insertions    | 556 (100.0%) | 574 (100.0%)  | 1130 (100.0%) |
|                 | IUS insertion completed |              |               |               |
|                 | no                      | 28 ( 5.0%)   | 28 ( 4.9%)    | 56 ( 5.0%)    |
| yes             | 528 ( 95.0%)            | 546 ( 95.1%) | 1074 ( 95.0%) |               |
| 1 birth or more | Number of insertions    | 876 (100.0%) | 878 (100.0%)  | 1754 (100.0%) |
|                 | IUS insertion completed |              |               |               |
|                 | no                      | 24 ( 2.7%)   | 34 ( 3.9%)    | 58 ( 3.3%)    |
| yes             | 852 ( 97.3%)            | 844 ( 96.1%) | 1696 ( 96.7%) |               |

Bayer: /by-sasp/patdb/projects/de04209/310442/stat/test\_query06/pgms/t-ius-admin-compl-ces.sas sgrpp 14JUL2015 13:51  
 End of table

**Table /4: Number of successful first insertion by treatment and type of prior births (parous women only) (FAS)**

| Cesarian section only |                         | LCS12        | LCS16        | Total         |
|-----------------------|-------------------------|--------------|--------------|---------------|
| no                    | Number of insertions    | 688 (100.0%) | 709 (100.0%) | 1397 (100.0%) |
|                       | IUS insertion completed |              |              |               |
|                       | no                      | 17 ( 2.5%)   | 27 ( 3.8%)   | 44 ( 3.1%)    |
|                       | yes                     | 671 ( 97.5%) | 682 ( 96.2%) | 1353 ( 96.9%) |
| yes                   | Number of insertions    | 188 (100.0%) | 169 (100.0%) | 357 (100.0%)  |
|                       | IUS insertion completed |              |              |               |
|                       | no                      | 7 ( 3.7%)    | 7 ( 4.1%)    | 14 ( 3.9%)    |
|                       | yes                     | 181 ( 96.3%) | 162 ( 95.9%) | 343 ( 96.1%)  |

Bayer: /by-sasp/patdb/projects/de04209/310442/stat/test\_query06/pgms/t-ius-admin-compl-ces.sas sgrpp 14JUL2015 13:51  
 End of table

**Table /5: Number of successful second insertion by treatment and parity (FAS)**

| Parity          |                         | LCS12       | LCS16       | Total       |
|-----------------|-------------------------|-------------|-------------|-------------|
| 0 births        | Number of insertions    | 25 (100.0%) | 25 (100.0%) | 50 (100.0%) |
|                 | IUS insertion completed |             |             |             |
|                 | no                      | 2 ( 8.0%)   | 1 ( 4.0%)   | 3 ( 6.0%)   |
| yes             | 23 ( 92.0%)             | 24 ( 96.0%) | 47 ( 94.0%) |             |
| 1 birth or more | Number of insertions    | 24 (100.0%) | 32 (100.0%) | 56 (100.0%) |
|                 | IUS insertion completed |             |             |             |
|                 | no                      | 1 ( 4.2%)   | 1 ( 3.1%)   | 2 ( 3.6%)   |
| yes             | 23 ( 95.8%)             | 31 ( 96.9%) | 54 ( 96.4%) |             |

Bayer: /by-sasp/patdb/projects/de04209/310442/stat/test\_query06/pgms/t-ius-admin-compl-ces.sas sgrpp 14JUL2015 13:51

End of table

**Table /6: Number of successful second insertion by treatment and type of prior births (parous women only) (FAS)**

| Cesarian section only |                         | LCS12       | LCS16       | Total       |
|-----------------------|-------------------------|-------------|-------------|-------------|
| no                    | Number of insertions    | 17 (100.0%) | 26 (100.0%) | 43 (100.0%) |
|                       | IUS insertion completed |             |             |             |
|                       | no                      | 1 ( 5.9%)   | 0           | 1 ( 2.3%)   |
|                       | yes                     | 16 ( 94.1%) | 26 (100.0%) | 42 ( 97.7%) |
| yes                   | Number of insertions    | 7 (100.0%)  | 6 (100.0%)  | 13 (100.0%) |
|                       | IUS insertion completed |             |             |             |
|                       | no                      | 0           | 1 ( 16.7%)  | 1 ( 7.7%)   |
|                       | yes                     | 7 (100.0%)  | 5 ( 83.3%)  | 12 ( 92.3%) |

Bayer: /by-sasp/patdb/projects/de04209/310442/stat/test\_query06/pgms/t-ius-admin-compl-ces.sas sgrpp 14JUL2015 13:51  
 End of table

**Table /7: Investigator's evaluation of IUS insertion procedure by parity (0 births vs. 1 or more) and treatment (FAS)**

|                    | LCS12         | LCS16         | Total         |
|--------------------|---------------|---------------|---------------|
| n                  | 1432 (100.0%) | 1452 (100.0%) | 2884 (100.0%) |
| Parity             |               |               |               |
| 0 births           | 556 ( 38.8%)  | 574 ( 39.5%)  | 1130 ( 39.2%) |
| - of these: easy   | 468 ( 84.2%)  | 484 ( 84.3%)  | 952 ( 84.2%)  |
| slightly difficult | 76 ( 13.7%)   | 78 ( 13.6%)   | 154 ( 13.6%)  |
| very difficult     | 12 ( 2.2%)    | 12 ( 2.1%)    | 24 ( 2.1%)    |
| 1 birth or more    | 876 ( 61.2%)  | 878 ( 60.5%)  | 1754 ( 60.8%) |
| - of these: easy   | 815 ( 93.0%)  | 818 ( 93.2%)  | 1633 ( 93.1%) |
| slightly difficult | 55 ( 6.3%)    | 54 ( 6.2%)    | 109 ( 6.2%)   |
| very difficult     | 6 ( 0.7%)     | 6 ( 0.7%)     | 12 ( 0.7%)    |

Bayer: /by-sasp/patdb/projects/de04209/310442/stat/test\_query06/pgms/t-ius-admin-compl-ces.sas sgrpp 14JUL2015 13:51

End of table



**Table /8: Investigator's evaluation of IUS insertion procedure and type of prior births (parous women only) and treatment (FAS)**

|                       | LCS12        | LCS16        | Total         |
|-----------------------|--------------|--------------|---------------|
| n                     | 876 (100.0%) | 878 (100.0%) | 1754 (100.0%) |
| Cesarian section only |              |              |               |
| no                    | 688 ( 78.5%) | 709 ( 80.8%) | 1397 ( 79.6%) |
| - of these: easy      | 651 ( 94.6%) | 669 ( 94.4%) | 1320 ( 94.5%) |
| slightly difficult    | 33 ( 4.8%)   | 37 ( 5.2%)   | 70 ( 5.0%)    |
| very difficult        | 4 ( 0.6%)    | 3 ( 0.4%)    | 7 ( 0.5%)     |
| yes                   | 188 ( 21.5%) | 169 ( 19.2%) | 357 ( 20.4%)  |
| - of these: easy      | 164 ( 87.2%) | 149 ( 88.2%) | 313 ( 87.7%)  |
| slightly difficult    | 22 ( 11.7%)  | 17 ( 10.1%)  | 39 ( 10.9%)   |
| very difficult        | 2 ( 1.1%)    | 3 ( 1.8%)    | 5 ( 1.4%)     |

Bayer: /by-sasp/patdb/projects/de04209/310442/stat/test\_query06/pgms/t-ius-admin-compl-ces.sas sgrpp 14JUL2015 13:51  
 End of table

**Table /9: Subject's evaluation of pain during IUS insertion procedure by parity (0 births vs. 1 or more) and treatment (FAS)**

|                      | LCS12         | LCS16         | Total         |
|----------------------|---------------|---------------|---------------|
| Number of insertions | 1432 (100.0%) | 1452 (100.0%) | 2884 (100.0%) |
| Parity               |               |               |               |
| 0 births             | 556 ( 38.8%)  | 574 ( 39.5%)  | 1130 ( 39.2%) |
| - of these: missing  | 0             | 1 ( 0.2%)     | 1 ( <0.1%)    |
| none                 | 40 ( 7.2%)    | 29 ( 5.1%)    | 69 ( 6.1%)    |
| mild                 | 178 ( 32.0%)  | 225 ( 39.2%)  | 403 ( 35.7%)  |
| moderate             | 246 ( 44.2%)  | 236 ( 41.1%)  | 482 ( 42.7%)  |
| severe               | 92 ( 16.5%)   | 83 ( 14.5%)   | 175 ( 15.5%)  |
| 1 birth or more      | 876 ( 61.2%)  | 878 ( 60.5%)  | 1754 ( 60.8%) |
| - of these: none     | 255 ( 29.1%)  | 239 ( 27.2%)  | 494 ( 28.2%)  |
| mild                 | 451 ( 51.5%)  | 458 ( 52.2%)  | 909 ( 51.8%)  |
| moderate             | 144 ( 16.4%)  | 164 ( 18.7%)  | 308 ( 17.6%)  |
| severe               | 26 ( 3.0%)    | 17 ( 1.9%)    | 43 ( 2.5%)    |

Bayer: /by-sasp/patdb/projects/de04209/310442/stat/test\_query06/pgms/t-ius-admin-compl-ces.sas sgrpp 14JUL2015 13:51

End of table

**Table /10: Subject's evaluation of pain during IUS insertion procedure by type of prior births (parous women only) and treatment (FAS)**

|                       | LCS12        | LCS16        | Total         |
|-----------------------|--------------|--------------|---------------|
| Number of insertions  | 876 (100.0%) | 878 (100.0%) | 1754 (100.0%) |
| Cesarian section only |              |              |               |
| no                    | 688 ( 78.5%) | 709 ( 80.8%) | 1397 ( 79.6%) |
| - of these: none      | 218 ( 31.7%) | 202 ( 28.5%) | 420 ( 30.1%)  |
| mild                  | 356 ( 51.7%) | 367 ( 51.8%) | 723 ( 51.8%)  |
| moderate              | 99 ( 14.4%)  | 128 ( 18.1%) | 227 ( 16.2%)  |
| severe                | 15 ( 2.2%)   | 12 ( 1.7%)   | 27 ( 1.9%)    |
| yes                   | 188 ( 21.5%) | 169 ( 19.2%) | 357 ( 20.4%)  |
| - of these: none      | 37 ( 19.7%)  | 37 ( 21.9%)  | 74 ( 20.7%)   |
| mild                  | 95 ( 50.5%)  | 91 ( 53.8%)  | 186 ( 52.1%)  |
| moderate              | 45 ( 23.9%)  | 36 ( 21.3%)  | 81 ( 22.7%)   |
| severe                | 11 ( 5.9%)   | 5 ( 3.0%)    | 16 ( 4.5%)    |

Bayer: /by-sasp/patdb/projects/de04209/310442/stat/test\_query06/pgms/t-ius-admin-compl-ces.sas sgrpp 14JUL2015 13:51  
 End of table

**Table /11: Number of subjects with dilatation performed including 'when' by parity and treatment (FAS)**

| Parity                                |                                       | LCS12                | LCS16        | Total         |
|---------------------------------------|---------------------------------------|----------------------|--------------|---------------|
| 0 births                              | Number of insertions                  | 556 (100.0%)         | 574 (100.0%) | 1130 (100.0%) |
|                                       | IUS insertion, dilatation used        |                      |              |               |
|                                       | no                                    | 505 ( 90.8%)         | 521 ( 90.8%) | 1026 ( 90.8%) |
|                                       | missing                               | 505 ( 90.8%)         | 520 ( 90.6%) | 1025 ( 90.7%) |
|                                       | before procedure was performed        | 0                    | 1 ( 0.2%)    | 1 (<0.1%)     |
|                                       | yes                                   | 51 ( 9.2%)           | 53 ( 9.2%)   | 104 ( 9.2%)   |
|                                       | before procedure was performed        | 36 ( 6.5%)           | 31 ( 5.4%)   | 67 ( 5.9%)    |
|                                       | when procedure proved to be difficult | 14 ( 2.5%)           | 22 ( 3.8%)   | 36 ( 3.2%)    |
|                                       | when procedure proved to be painful   | 1 ( 0.2%)            | 0            | 1 (<0.1%)     |
|                                       | 1 birth or more                       | Number of insertions | 876 (100.0%) | 878 (100.0%)  |
| IUS insertion, dilatation used        |                                       |                      |              |               |
| no                                    |                                       | 850 ( 97.0%)         | 849 ( 96.7%) | 1699 ( 96.9%) |
| missing                               |                                       | 850 ( 97.0%)         | 849 ( 96.7%) | 1699 ( 96.9%) |
| before procedure was performed        |                                       | 0                    | 0            | 0             |
| yes                                   |                                       | 26 ( 3.0%)           | 29 ( 3.3%)   | 55 ( 3.1%)    |
| before procedure was performed        |                                       | 18 ( 2.1%)           | 20 ( 2.3%)   | 38 ( 2.2%)    |
| when procedure proved to be difficult |                                       | 8 ( 0.9%)            | 9 ( 1.0%)    | 17 ( 1.0%)    |
| when procedure proved to be painful   |                                       | 0                    | 0            | 0             |

Bayer: /by-sasp/patdb/projects/de04209/310442/stat/test\_query06/pgms/t-ius-admin-compl-ces.sas sgrpp 14JUL2015 13:51  
 End of table

**Table /12: Number of subjects with dilatation performed including 'when' by type of prior births (parous women only)  
 (FAS)**

| Cesarian section only |                                       | LCS12        | LCS16        | Total         |
|-----------------------|---------------------------------------|--------------|--------------|---------------|
| no                    | Number of insertions                  | 688 (100.0%) | 709 (100.0%) | 1397 (100.0%) |
|                       | IUS insertion, dilatation used        |              |              |               |
|                       | no                                    | 672 ( 97.7%) | 692 ( 97.6%) | 1364 ( 97.6%) |
|                       | yes                                   | 16 ( 2.3%)   | 17 ( 2.4%)   | 33 ( 2.4%)    |
|                       | before procedure was performed        | 11 ( 1.6%)   | 12 ( 1.7%)   | 23 ( 1.6%)    |
|                       | when procedure proved to be difficult | 5 ( 0.7%)    | 5 ( 0.7%)    | 10 ( 0.7%)    |
| yes                   | Number of insertions                  | 188 (100.0%) | 169 (100.0%) | 357 (100.0%)  |
|                       | IUS insertion, dilatation used        |              |              |               |
|                       | no                                    | 178 ( 94.7%) | 157 ( 92.9%) | 335 ( 93.8%)  |
|                       | yes                                   | 10 ( 5.3%)   | 12 ( 7.1%)   | 22 ( 6.2%)    |
|                       | before procedure was performed        | 7 ( 3.7%)    | 8 ( 4.7%)    | 15 ( 4.2%)    |
|                       | when procedure proved to be difficult | 3 ( 1.6%)    | 4 ( 2.4%)    | 7 ( 2.0%)     |

Bayer: /by-sasp/patdb/projects/de04209/310442/stat/test\_query06/pgms/t-ius-admin-compl-ces.sas sgrpp 14JUL2015 13:51

End of table

**Table /13: Number of subjects who prematurely discontinued the study medication (including main reason) after randomization by treatment and year (all randomized subjects)**

| YEAR AFTER INSERTION: 1st year           |               |               |               |
|------------------------------------------|---------------|---------------|---------------|
|                                          | LCS12         | LCS16         | Total         |
| Study medication, administration status  |               |               |               |
| n                                        | 1432 (100.0%) | 1453 (100.0%) | 2885 (100.0%) |
| study medication never administered      | 0             | 2 ( 0.1%)     | 2 ( <0.1%)    |
| completed                                | 0             | 0             | 0             |
| prematurely discontinued                 | 266 ( 18.6%)  | 245 ( 16.9%)  | 511 ( 17.7%)  |
| ongoing                                  | 1166 ( 81.4%) | 1206 ( 83.0%) | 2372 ( 82.2%) |
| missing                                  | 0             | 0             | 0             |
| Premature EOSM or never taken, reason    |               |               |               |
| n                                        | 266 (100.0%)  | 247 (100.0%)  | 513 (100.0%)  |
| withdrawal of consent                    | 11 ( 4.1%)    | 9 ( 3.6%)     | 20 ( 3.9%)    |
| protocol deviation                       | 3 ( 1.1%)     | 0             | 3 ( 0.6%)     |
| adverse event                            | 175 ( 65.8%)  | 168 ( 68.0%)  | 343 ( 66.9%)  |
| death                                    | 0             | 0             | 0             |
| pat. lost, no further information avail. | 25 ( 9.4%)    | 21 ( 8.5%)    | 46 ( 9.0%)    |
| pregnancy                                | 5 ( 1.9%)     | 2 ( 0.8%)     | 7 ( 1.4%)     |
| other                                    | 47 ( 17.7%)   | 47 ( 19.0%)   | 94 ( 18.3%)   |

Note: Year is calculated using the formula year = (last day on study (imputed)- insertion date)/365

Bayer: /by-sasp/patdb/projects/de04209/310442/stat/test\_query06/pgms/t-ds3-2-parity-age.sas sgrpp 14JUL2015 13:51

Table /13: Number of subjects who prematurely discontinued the study medication (including main reason) after randomization by treatment and year (all randomized subjects) (cont.)

| YEAR AFTER INSERTION: 2nd year           |               |               |               |
|------------------------------------------|---------------|---------------|---------------|
|                                          | LCS12         | LCS16         | Total         |
| Study medication, administration status  |               |               |               |
| n                                        | 1166 (100.0%) | 1206 (100.0%) | 2372 (100.0%) |
| study medication never administered      | 0             | 0             | 0             |
| completed                                | 0             | 0             | 0             |
| prematurely discontinued                 | 203 ( 17.4%)  | 194 ( 16.1%)  | 397 ( 16.7%)  |
| ongoing                                  | 963 ( 82.6%)  | 1012 ( 83.9%) | 1975 ( 83.3%) |
| missing                                  | 0             | 0             | 0             |
| Premature EOSM or never taken, reason    |               |               |               |
| n                                        | 203 (100.0%)  | 194 (100.0%)  | 397 (100.0%)  |
| withdrawal of consent                    | 9 ( 4.4%)     | 14 ( 7.2%)    | 23 ( 5.8%)    |
| protocol deviation                       | 5 ( 2.5%)     | 8 ( 4.1%)     | 13 ( 3.3%)    |
| adverse event                            | 85 ( 41.9%)   | 66 ( 34.0%)   | 151 ( 38.0%)  |
| death                                    | 0             | 0             | 0             |
| pat. lost, no further information avail. | 23 ( 11.3%)   | 21 ( 10.8%)   | 44 ( 11.1%)   |
| pregnancy                                | 3 ( 1.5%)     | 3 ( 1.5%)     | 6 ( 1.5%)     |
| other                                    | 78 ( 38.4%)   | 82 ( 42.3%)   | 160 ( 40.3%)  |

Note: Year is calculated using the formula year = (last day on study (imputed)- insertion date)/365  
 Bayer: /by-sasp/patdb/projects/de04209/310442/stat/test\_query06/pgms/t-ds3-2-parity-age.sas sgrpp 14JUL2015 13:51

Table /13: Number of subjects who prematurely discontinued the study medication (including main reason) after randomization by treatment and year (all randomized subjects) (cont.)

| YEAR AFTER INSERTION: 3rd year                 |              |               |               |
|------------------------------------------------|--------------|---------------|---------------|
|                                                | LCS12        | LCS16         | Total         |
| <b>Study medication, administration status</b> |              |               |               |
| n                                              | 963 (100.0%) | 1012 (100.0%) | 1975 (100.0%) |
| study medication never administered            | 0            | 0             | 0             |
| completed                                      | 819 ( 85.0%) | 163 ( 16.1%)  | 982 ( 49.7%)  |
| prematurely discontinued                       | 143 ( 14.8%) | 142 ( 14.0%)  | 285 ( 14.4%)  |
| ongoing                                        | 0            | 707 ( 69.9%)  | 707 ( 35.8%)  |
| missing                                        | 1 ( 0.1%)    | 0             | 1 ( <0.1%)    |
| <b>Premature EOSM or never taken, reason</b>   |              |               |               |
| n                                              | 144 (100.0%) | 142 (100.0%)  | 286 (100.0%)  |
| withdrawal of consent                          | 6 ( 4.2%)    | 8 ( 5.6%)     | 14 ( 4.9%)    |
| protocol deviation                             | 8 ( 5.6%)    | 8 ( 5.6%)     | 16 ( 5.6%)    |
| adverse event                                  | 53 ( 36.8%)  | 44 ( 31.0%)   | 97 ( 33.9%)   |
| death                                          | 0            | 1 ( 0.7%)     | 1 ( 0.3%)     |
| pat. lost, no further information avail.       | 15 ( 10.4%)  | 19 ( 13.4%)   | 34 ( 11.9%)   |
| pregnancy                                      | 1 ( 0.7%)    | 5 ( 3.5%)     | 6 ( 2.1%)     |
| other                                          | 61 ( 42.4%)  | 57 ( 40.1%)   | 118 ( 41.3%)  |

Note: Year is calculated using the formula year = (last day on study (imputed)- insertion date)/365  
 Bayer: /by-sasp/patdb/projects/de04209/310442/stat/test\_query06/pgms/t-ds3-2-parity-age.sas sgrpp 14JUL2015 13:51



Table /13: Number of subjects who prematurely discontinued the study medication (including main reason) after randomization by treatment and year (all randomized subjects) (cont.)

| YEAR AFTER INSERTION: Overall                  |               |               |               |
|------------------------------------------------|---------------|---------------|---------------|
|                                                | LCS12         | LCS16         | Total         |
| <b>Study medication, administration status</b> |               |               |               |
| n                                              | 1432 (100.0%) | 1453 (100.0%) | 2885 (100.0%) |
| study medication never administered            | 0             | 2 ( 0.1%)     | 2 ( <0.1%)    |
| completed                                      | 819 ( 57.2%)  | 163 ( 11.2%)  | 982 ( 34.0%)  |
| prematurely discontinued                       | 612 ( 42.7%)  | 581 ( 40.0%)  | 1193 ( 41.4%) |
| ongoing                                        | 0             | 707 ( 48.7%)  | 707 ( 24.5%)  |
| missing                                        | 1 ( <0.1%)    | 0             | 1 ( <0.1%)    |
| <b>Premature EOSM or never taken, reason</b>   |               |               |               |
| n                                              | 613 (100.0%)  | 583 (100.0%)  | 1196 (100.0%) |
| withdrawal of consent                          | 26 ( 4.2%)    | 31 ( 5.3%)    | 57 ( 4.8%)    |
| protocol deviation                             | 16 ( 2.6%)    | 16 ( 2.7%)    | 32 ( 2.7%)    |
| adverse event                                  | 313 ( 51.1%)  | 278 ( 47.7%)  | 591 ( 49.4%)  |
| death                                          | 0             | 1 ( 0.2%)     | 1 ( <0.1%)    |
| pat. lost, no further information avail.       | 63 ( 10.3%)   | 61 ( 10.5%)   | 124 ( 10.4%)  |
| pregnancy                                      | 9 ( 1.5%)     | 10 ( 1.7%)    | 19 ( 1.6%)    |
| other                                          | 186 ( 30.3%)  | 186 ( 31.9%)  | 372 ( 31.1%)  |

Note: Year is calculated using the formula year = (last day on study (imputed)- insertion date)/365

Bayer: /by-sasp/patdb/projects/de04209/310442/stat/test\_query06/pgms/t-ds3-2-parity-age.sas sgrpp 14JUL2015 13:51

End of table

**Table /14: Number of subjects who prematurely discontinued the study medication (including main reason) after randomization by treatment, year and parity (all randomized subjects)**

YEAR AFTER INSERTION: 1st year

| Parity                                   |                                          | LCS12                                   | LCS16        | Total         |
|------------------------------------------|------------------------------------------|-----------------------------------------|--------------|---------------|
| 0 births                                 | Study medication, administration status  |                                         |              |               |
|                                          | n                                        | 556 (100.0%)                            | 574 (100.0%) | 1130 (100.0%) |
|                                          | study medication never administered      | 0                                       | 0            | 0             |
|                                          | completed                                | 0                                       | 0            | 0             |
|                                          | prematurely discontinued                 | 118 ( 21.2%)                            | 116 ( 20.2%) | 234 ( 20.7%)  |
|                                          | ongoing                                  | 438 ( 78.8%)                            | 458 ( 79.8%) | 896 ( 79.3%)  |
|                                          | missing                                  | 0                                       | 0            | 0             |
|                                          | Premature EOSM or never taken, reason    |                                         |              |               |
|                                          | n                                        | 118 (100.0%)                            | 116 (100.0%) | 234 (100.0%)  |
|                                          | withdrawal of consent                    | 6 ( 5.1%)                               | 4 ( 3.4%)    | 10 ( 4.3%)    |
|                                          | protocol deviation                       | 1 ( 0.8%)                               | 0            | 1 ( 0.4%)     |
|                                          | adverse event                            | 87 ( 73.7%)                             | 81 ( 69.8%)  | 168 ( 71.8%)  |
|                                          | death                                    | 0                                       | 0            | 0             |
|                                          | pat. lost, no further information avail. | 4 ( 3.4%)                               | 9 ( 7.8%)    | 13 ( 5.6%)    |
|                                          | pregnancy                                | 2 ( 1.7%)                               | 0            | 2 ( 0.9%)     |
|                                          | other                                    | 18 ( 15.3%)                             | 22 ( 19.0%)  | 40 ( 17.1%)   |
|                                          | 1 birth or more                          | Study medication, administration status |              |               |
| n                                        |                                          | 876 (100.0%)                            | 879 (100.0%) | 1755 (100.0%) |
| study medication never administered      |                                          | 0                                       | 2 ( 0.2%)    | 2 ( 0.1%)     |
| completed                                |                                          | 0                                       | 0            | 0             |
| prematurely discontinued                 |                                          | 148 ( 16.9%)                            | 129 ( 14.7%) | 277 ( 15.8%)  |
| ongoing                                  |                                          | 728 ( 83.1%)                            | 748 ( 85.1%) | 1476 ( 84.1%) |
| missing                                  |                                          | 0                                       | 0            | 0             |
| Premature EOSM or never taken, reason    |                                          |                                         |              |               |
| n                                        |                                          | 148 (100.0%)                            | 131 (100.0%) | 279 (100.0%)  |
| withdrawal of consent                    |                                          | 5 ( 3.4%)                               | 5 ( 3.8%)    | 10 ( 3.6%)    |
| protocol deviation                       |                                          | 2 ( 1.4%)                               | 0            | 2 ( 0.7%)     |
| adverse event                            |                                          | 88 ( 59.5%)                             | 87 ( 66.4%)  | 175 ( 62.7%)  |
| death                                    |                                          | 0                                       | 0            | 0             |
| pat. lost, no further information avail. |                                          | 21 ( 14.2%)                             | 12 ( 9.2%)   | 33 ( 11.8%)   |
| pregnancy                                |                                          | 3 ( 2.0%)                               | 2 ( 1.5%)    | 5 ( 1.8%)     |
| other                                    |                                          | 29 ( 19.6%)                             | 25 ( 19.1%)  | 54 ( 19.4%)   |

Note: Year is calculated using the formula year = (last day on study (imputed)- insertion date)/365

Bayer: /by-sasp/patdb/projects/de04209/310442/stat/test\_query06/pgms/t-ds3-2-parity-age.sas sgrpp 14JUL2015 13:51

Table /14: Number of subjects who prematurely discontinued the study medication (including main reason) after randomization by treatment, year and parity (all randomized subjects) (cont.)

YEAR AFTER INSERTION: 2nd year

| Parity                                   |                                          | LCS12                                   | LCS16        | Total         |
|------------------------------------------|------------------------------------------|-----------------------------------------|--------------|---------------|
| 0 births                                 | Study medication, administration status  |                                         |              |               |
|                                          | n                                        | 438 (100.0%)                            | 458 (100.0%) | 896 (100.0%)  |
|                                          | study medication never administered      | 0                                       | 0            | 0             |
|                                          | completed                                | 0                                       | 0            | 0             |
|                                          | prematurely discontinued                 | 85 ( 19.4%)                             | 76 ( 16.6%)  | 161 ( 18.0%)  |
|                                          | ongoing                                  | 353 ( 80.6%)                            | 382 ( 83.4%) | 735 ( 82.0%)  |
|                                          | missing                                  | 0                                       | 0            | 0             |
|                                          | Premature EOSM or never taken, reason    |                                         |              |               |
|                                          | n                                        | 85 (100.0%)                             | 76 (100.0%)  | 161 (100.0%)  |
|                                          | withdrawal of consent                    | 2 ( 2.4%)                               | 5 ( 6.6%)    | 7 ( 4.3%)     |
|                                          | protocol deviation                       | 2 ( 2.4%)                               | 1 ( 1.3%)    | 3 ( 1.9%)     |
|                                          | adverse event                            | 41 ( 48.2%)                             | 26 ( 34.2%)  | 67 ( 41.6%)   |
|                                          | death                                    | 0                                       | 0            | 0             |
|                                          | pat. lost, no further information avail. | 3 ( 3.5%)                               | 7 ( 9.2%)    | 10 ( 6.2%)    |
|                                          | pregnancy                                | 1 ( 1.2%)                               | 0            | 1 ( 0.6%)     |
|                                          | other                                    | 36 ( 42.4%)                             | 37 ( 48.7%)  | 73 ( 45.3%)   |
|                                          | 1 birth or more                          | Study medication, administration status |              |               |
| n                                        |                                          | 728 (100.0%)                            | 748 (100.0%) | 1476 (100.0%) |
| study medication never administered      |                                          | 0                                       | 0            | 0             |
| completed                                |                                          | 0                                       | 0            | 0             |
| prematurely discontinued                 |                                          | 118 ( 16.2%)                            | 118 ( 15.8%) | 236 ( 16.0%)  |
| ongoing                                  |                                          | 610 ( 83.8%)                            | 630 ( 84.2%) | 1240 ( 84.0%) |
| missing                                  |                                          | 0                                       | 0            | 0             |
| Premature EOSM or never taken, reason    |                                          |                                         |              |               |
| n                                        |                                          | 118 (100.0%)                            | 118 (100.0%) | 236 (100.0%)  |
| withdrawal of consent                    |                                          | 7 ( 5.9%)                               | 9 ( 7.6%)    | 16 ( 6.8%)    |
| protocol deviation                       |                                          | 3 ( 2.5%)                               | 7 ( 5.9%)    | 10 ( 4.2%)    |
| adverse event                            |                                          | 44 ( 37.3%)                             | 40 ( 33.9%)  | 84 ( 35.6%)   |
| death                                    |                                          | 0                                       | 0            | 0             |
| pat. lost, no further information avail. |                                          | 20 ( 16.9%)                             | 14 ( 11.9%)  | 34 ( 14.4%)   |
| pregnancy                                |                                          | 2 ( 1.7%)                               | 3 ( 2.5%)    | 5 ( 2.1%)     |
| other                                    |                                          | 42 ( 35.6%)                             | 45 ( 38.1%)  | 87 ( 36.9%)   |

Note: Year is calculated using the formula year = (last day on study (imputed)- insertion date)/365

Bayer: /by-sasp/patdb/projects/de04209/310442/stat/test\_query06/pgms/t-ds3-2-parity-age.sas sgrpp 14JUL2015 13:51

Table /14: Number of subjects who prematurely discontinued the study medication (including main reason) after randomization by treatment, year and parity (all randomized subjects) (cont.)

YEAR AFTER INSERTION: 3rd year

| Parity                                   |                                          | LCS12                                   | LCS16        | Total         |
|------------------------------------------|------------------------------------------|-----------------------------------------|--------------|---------------|
| 0 births                                 | Study medication, administration status  |                                         |              |               |
|                                          | n                                        | 353 (100.0%)                            | 382 (100.0%) | 735 (100.0%)  |
|                                          | study medication never administered      | 0                                       | 0            | 0             |
|                                          | completed                                | 302 ( 85.6%)                            | 72 ( 18.8%)  | 374 ( 50.9%)  |
|                                          | prematurely discontinued                 | 51 ( 14.4%)                             | 48 ( 12.6%)  | 99 ( 13.5%)   |
|                                          | ongoing                                  | 0                                       | 262 ( 68.6%) | 262 ( 35.6%)  |
|                                          | missing                                  | 0                                       | 0            | 0             |
|                                          | Premature EOSM or never taken, reason    |                                         |              |               |
|                                          | n                                        | 51 (100.0%)                             | 48 (100.0%)  | 99 (100.0%)   |
|                                          | withdrawal of consent                    | 2 ( 3.9%)                               | 3 ( 6.3%)    | 5 ( 5.1%)     |
|                                          | protocol deviation                       | 2 ( 3.9%)                               | 4 ( 8.3%)    | 6 ( 6.1%)     |
|                                          | adverse event                            | 17 ( 33.3%)                             | 11 ( 22.9%)  | 28 ( 28.3%)   |
|                                          | death                                    | 0                                       | 1 ( 2.1%)    | 1 ( 1.0%)     |
|                                          | pat. lost, no further information avail. | 4 ( 7.8%)                               | 5 ( 10.4%)   | 9 ( 9.1%)     |
|                                          | pregnancy                                | 1 ( 2.0%)                               | 3 ( 6.3%)    | 4 ( 4.0%)     |
|                                          | other                                    | 25 ( 49.0%)                             | 21 ( 43.8%)  | 46 ( 46.5%)   |
|                                          | 1 birth or more                          | Study medication, administration status |              |               |
| n                                        |                                          | 610 (100.0%)                            | 630 (100.0%) | 1240 (100.0%) |
| study medication never administered      |                                          | 0                                       | 0            | 0             |
| completed                                |                                          | 517 ( 84.8%)                            | 91 ( 14.4%)  | 608 ( 49.0%)  |
| prematurely discontinued                 |                                          | 92 ( 15.1%)                             | 94 ( 14.9%)  | 186 ( 15.0%)  |
| ongoing                                  |                                          | 0                                       | 445 ( 70.6%) | 445 ( 35.9%)  |
| missing                                  |                                          | 1 ( 0.2%)                               | 0            | 1 (<0.1%)     |
| Premature EOSM or never taken, reason    |                                          |                                         |              |               |
| n                                        |                                          | 93 (100.0%)                             | 94 (100.0%)  | 187 (100.0%)  |
| withdrawal of consent                    |                                          | 4 ( 4.3%)                               | 5 ( 5.3%)    | 9 ( 4.8%)     |
| protocol deviation                       |                                          | 6 ( 6.5%)                               | 4 ( 4.3%)    | 10 ( 5.3%)    |
| adverse event                            |                                          | 36 ( 38.7%)                             | 33 ( 35.1%)  | 69 ( 36.9%)   |
| death                                    |                                          | 0                                       | 0            | 0             |
| pat. lost, no further information avail. |                                          | 11 ( 11.8%)                             | 14 ( 14.9%)  | 25 ( 13.4%)   |
| pregnancy                                |                                          | 0                                       | 2 ( 2.1%)    | 2 ( 1.1%)     |
| other                                    |                                          | 36 ( 38.7%)                             | 36 ( 38.3%)  | 72 ( 38.5%)   |

Note: Year is calculated using the formula year = (last day on study (imputed)- insertion date)/365

Bayer: /by-sasp/patdb/projects/de04209/310442/stat/test\_query06/pgms/t-ds3-2-parity-age.sas sgrpp 14JUL2015 13:51

Table /14: Number of subjects who prematurely discontinued the study medication (including main reason) after randomization by treatment, year and parity (all randomized subjects) (cont.)

## YEAR AFTER INSERTION: Overall

| Parity                                   |                                          | LCS12                                   | LCS16        | Total         |
|------------------------------------------|------------------------------------------|-----------------------------------------|--------------|---------------|
| 0 births                                 | Study medication, administration status  |                                         |              |               |
|                                          | n                                        | 556 (100.0%)                            | 574 (100.0%) | 1130 (100.0%) |
|                                          | study medication never administered      | 0                                       | 0            | 0             |
|                                          | completed                                | 302 ( 54.3%)                            | 72 ( 12.5%)  | 374 ( 33.1%)  |
|                                          | prematurely discontinued                 | 254 ( 45.7%)                            | 240 ( 41.8%) | 494 ( 43.7%)  |
|                                          | ongoing                                  | 0                                       | 262 ( 45.6%) | 262 ( 23.2%)  |
|                                          | missing                                  | 0                                       | 0            | 0             |
|                                          | Premature EOSM or never taken, reason    |                                         |              |               |
|                                          | n                                        | 254 (100.0%)                            | 240 (100.0%) | 494 (100.0%)  |
|                                          | withdrawal of consent                    | 10 ( 3.9%)                              | 12 ( 5.0%)   | 22 ( 4.5%)    |
|                                          | protocol deviation                       | 5 ( 2.0%)                               | 5 ( 2.1%)    | 10 ( 2.0%)    |
|                                          | adverse event                            | 145 ( 57.1%)                            | 118 ( 49.2%) | 263 ( 53.2%)  |
|                                          | death                                    | 0                                       | 1 ( 0.4%)    | 1 ( 0.2%)     |
|                                          | pat. lost, no further information avail. | 11 ( 4.3%)                              | 21 ( 8.8%)   | 32 ( 6.5%)    |
|                                          | pregnancy                                | 4 ( 1.6%)                               | 3 ( 1.3%)    | 7 ( 1.4%)     |
|                                          | other                                    | 79 ( 31.1%)                             | 80 ( 33.3%)  | 159 ( 32.2%)  |
|                                          | 1 birth or more                          | Study medication, administration status |              |               |
| n                                        |                                          | 876 (100.0%)                            | 879 (100.0%) | 1755 (100.0%) |
| study medication never administered      |                                          | 0                                       | 2 ( 0.2%)    | 2 ( 0.1%)     |
| completed                                |                                          | 517 ( 59.0%)                            | 91 ( 10.4%)  | 608 ( 34.6%)  |
| prematurely discontinued                 |                                          | 358 ( 40.9%)                            | 341 ( 38.8%) | 699 ( 39.8%)  |
| ongoing                                  |                                          | 0                                       | 445 ( 50.6%) | 445 ( 25.4%)  |
| missing                                  |                                          | 1 ( 0.1%)                               | 0            | 1 ( <0.1%)    |
| Premature EOSM or never taken, reason    |                                          |                                         |              |               |
| n                                        |                                          | 359 (100.0%)                            | 343 (100.0%) | 702 (100.0%)  |
| withdrawal of consent                    |                                          | 16 ( 4.5%)                              | 19 ( 5.5%)   | 35 ( 5.0%)    |
| protocol deviation                       |                                          | 11 ( 3.1%)                              | 11 ( 3.2%)   | 22 ( 3.1%)    |
| adverse event                            |                                          | 168 ( 46.8%)                            | 160 ( 46.6%) | 328 ( 46.7%)  |
| death                                    |                                          | 0                                       | 0            | 0             |
| pat. lost, no further information avail. |                                          | 52 ( 14.5%)                             | 40 ( 11.7%)  | 92 ( 13.1%)   |
| pregnancy                                |                                          | 5 ( 1.4%)                               | 7 ( 2.0%)    | 12 ( 1.7%)    |
| other                                    |                                          | 107 ( 29.8%)                            | 106 ( 30.9%) | 213 ( 30.3%)  |

Note: Year is calculated using the formula year = (last day on study (imputed)- insertion date)/365

Bayer: /by-sasp/patdb/projects/de04209/310442/stat/test\_query06/pgms/t-ds3-2-parity-age.sas sgrpp 14JUL2015 13:51

End of table

**Table /15: Number of subjects who prematurely discontinued the study medication (including main reason) after randomization by treatment, year and age group (all randomized subjects)**

| YEAR AFTER INSERTION: 1st year           |                                          |                                         |              |               |
|------------------------------------------|------------------------------------------|-----------------------------------------|--------------|---------------|
| Age category                             |                                          | LCS12                                   | LCS16        | Total         |
| age <= 25                                | Study medication, administration status  |                                         |              |               |
|                                          | n                                        | 566 (100.0%)                            | 564 (100.0%) | 1130 (100.0%) |
|                                          | study medication never administered      | 0                                       | 1 ( 0.2%)    | 1 ( <0.1%)    |
|                                          | completed                                | 0                                       | 0            | 0             |
|                                          | prematurely discontinued                 | 129 ( 22.8%)                            | 104 ( 18.4%) | 233 ( 20.6%)  |
|                                          | ongoing                                  | 437 ( 77.2%)                            | 459 ( 81.4%) | 896 ( 79.3%)  |
|                                          | missing                                  | 0                                       | 0            | 0             |
|                                          | Premature EOSM or never taken, reason    |                                         |              |               |
|                                          | n                                        | 129 (100.0%)                            | 105 (100.0%) | 234 (100.0%)  |
|                                          | withdrawal of consent                    | 4 ( 3.1%)                               | 6 ( 5.7%)    | 10 ( 4.3%)    |
|                                          | protocol deviation                       | 1 ( 0.8%)                               | 0            | 1 ( 0.4%)     |
|                                          | adverse event                            | 82 ( 63.6%)                             | 70 ( 66.7%)  | 152 ( 65.0%)  |
|                                          | death                                    | 0                                       | 0            | 0             |
|                                          | pat. lost, no further information avail. | 15 ( 11.6%)                             | 10 ( 9.5%)   | 25 ( 10.7%)   |
|                                          | pregnancy                                | 1 ( 0.8%)                               | 1 ( 1.0%)    | 2 ( 0.9%)     |
|                                          | other                                    | 26 ( 20.2%)                             | 18 ( 17.1%)  | 44 ( 18.8%)   |
|                                          | 25 < age <= 35                           | Study medication, administration status |              |               |
| n                                        |                                          | 866 (100.0%)                            | 889 (100.0%) | 1755 (100.0%) |
| study medication never administered      |                                          | 0                                       | 1 ( 0.1%)    | 1 ( <0.1%)    |
| completed                                |                                          | 0                                       | 0            | 0             |
| prematurely discontinued                 |                                          | 137 ( 15.8%)                            | 141 ( 15.9%) | 278 ( 15.8%)  |
| ongoing                                  |                                          | 729 ( 84.2%)                            | 747 ( 84.0%) | 1476 ( 84.1%) |
| missing                                  |                                          | 0                                       | 0            | 0             |
| Premature EOSM or never taken, reason    |                                          |                                         |              |               |
| n                                        |                                          | 137 (100.0%)                            | 142 (100.0%) | 279 (100.0%)  |
| withdrawal of consent                    |                                          | 7 ( 5.1%)                               | 3 ( 2.1%)    | 10 ( 3.6%)    |
| protocol deviation                       |                                          | 2 ( 1.5%)                               | 0            | 2 ( 0.7%)     |
| adverse event                            |                                          | 93 ( 67.9%)                             | 98 ( 69.0%)  | 191 ( 68.5%)  |
| death                                    |                                          | 0                                       | 0            | 0             |
| pat. lost, no further information avail. |                                          | 10 ( 7.3%)                              | 11 ( 7.7%)   | 21 ( 7.5%)    |
| pregnancy                                |                                          | 4 ( 2.9%)                               | 1 ( 0.7%)    | 5 ( 1.8%)     |
| other                                    |                                          | 21 ( 15.3%)                             | 29 ( 20.4%)  | 50 ( 17.9%)   |

Note: Year is calculated using the formula year = (last day on study (imputed)- insertion date)/365

Bayer: /by-sasp/patdb/projects/de04209/310442/stat/test\_query06/pgms/t-ds3-2-parity-age.sas sgrpp 14JUL2015 13:51

Table /15: Number of subjects who prematurely discontinued the study medication (including main reason) after randomization by treatment, year and age group (all randomized subjects) (cont.)

## YEAR AFTER INSERTION: 2nd year

| Age category                             |                                          | LCS12                                   | LCS16        | Total         |
|------------------------------------------|------------------------------------------|-----------------------------------------|--------------|---------------|
| age <= 25                                | Study medication, administration status  |                                         |              |               |
|                                          | n                                        | 437 (100.0%)                            | 459 (100.0%) | 896 (100.0%)  |
|                                          | study medication never administered      | 0                                       | 0            | 0             |
|                                          | completed                                | 0                                       | 0            | 0             |
|                                          | prematurely discontinued                 | 82 ( 18.8%)                             | 75 ( 16.3%)  | 157 ( 17.5%)  |
|                                          | ongoing                                  | 355 ( 81.2%)                            | 384 ( 83.7%) | 739 ( 82.5%)  |
|                                          | missing                                  | 0                                       | 0            | 0             |
|                                          | Premature EOSM or never taken, reason    |                                         |              |               |
|                                          | n                                        | 82 (100.0%)                             | 75 (100.0%)  | 157 (100.0%)  |
|                                          | withdrawal of consent                    | 1 ( 1.2%)                               | 5 ( 6.7%)    | 6 ( 3.8%)     |
|                                          | protocol deviation                       | 3 ( 3.7%)                               | 3 ( 4.0%)    | 6 ( 3.8%)     |
|                                          | adverse event                            | 36 ( 43.9%)                             | 28 ( 37.3%)  | 64 ( 40.8%)   |
|                                          | death                                    | 0                                       | 0            | 0             |
|                                          | pat. lost, no further information avail. | 11 ( 13.4%)                             | 10 ( 13.3%)  | 21 ( 13.4%)   |
|                                          | pregnancy                                | 2 ( 2.4%)                               | 0            | 2 ( 1.3%)     |
|                                          | other                                    | 29 ( 35.4%)                             | 29 ( 38.7%)  | 58 ( 36.9%)   |
|                                          | 25 < age <= 35                           | Study medication, administration status |              |               |
| n                                        |                                          | 729 (100.0%)                            | 747 (100.0%) | 1476 (100.0%) |
| study medication never administered      |                                          | 0                                       | 0            | 0             |
| completed                                |                                          | 0                                       | 0            | 0             |
| prematurely discontinued                 |                                          | 121 ( 16.6%)                            | 119 ( 15.9%) | 240 ( 16.3%)  |
| ongoing                                  |                                          | 608 ( 83.4%)                            | 628 ( 84.1%) | 1236 ( 83.7%) |
| missing                                  |                                          | 0                                       | 0            | 0             |
| Premature EOSM or never taken, reason    |                                          |                                         |              |               |
| n                                        |                                          | 121 (100.0%)                            | 119 (100.0%) | 240 (100.0%)  |
| withdrawal of consent                    |                                          | 8 ( 6.6%)                               | 9 ( 7.6%)    | 17 ( 7.1%)    |
| protocol deviation                       |                                          | 2 ( 1.7%)                               | 5 ( 4.2%)    | 7 ( 2.9%)     |
| adverse event                            |                                          | 49 ( 40.5%)                             | 38 ( 31.9%)  | 87 ( 36.3%)   |
| death                                    |                                          | 0                                       | 0            | 0             |
| pat. lost, no further information avail. |                                          | 12 ( 9.9%)                              | 11 ( 9.2%)   | 23 ( 9.6%)    |
| pregnancy                                |                                          | 1 ( 0.8%)                               | 3 ( 2.5%)    | 4 ( 1.7%)     |
| other                                    |                                          | 49 ( 40.5%)                             | 53 ( 44.5%)  | 102 ( 42.5%)  |

Note: Year is calculated using the formula year = (last day on study (imputed)- insertion date)/365

Bayer: /by-sasp/patdb/projects/de04209/310442/stat/test\_query06/pgms/t-ds3-2-parity-age.sas sgrpp 14JUL2015 13:51

Table /15: Number of subjects who prematurely discontinued the study medication (including main reason) after randomization by treatment, year and age group (all randomized subjects) (cont.)

YEAR AFTER INSERTION: 3rd year

| Age category                             |                                          | LCS12                                   | LCS16        | Total         |
|------------------------------------------|------------------------------------------|-----------------------------------------|--------------|---------------|
| age <= 25                                | Study medication, administration status  |                                         |              |               |
|                                          | n                                        | 355 (100.0%)                            | 384 (100.0%) | 739 (100.0%)  |
|                                          | study medication never administered      | 0                                       | 0            | 0             |
|                                          | completed                                | 288 ( 81.1%)                            | 73 ( 19.0%)  | 361 ( 48.8%)  |
|                                          | prematurely discontinued                 | 66 ( 18.6%)                             | 57 ( 14.8%)  | 123 ( 16.6%)  |
|                                          | ongoing                                  | 0                                       | 254 ( 66.1%) | 254 ( 34.4%)  |
|                                          | missing                                  | 1 ( 0.3%)                               | 0            | 1 ( 0.1%)     |
|                                          | Premature EOSM or never taken, reason    |                                         |              |               |
|                                          | n                                        | 67 (100.0%)                             | 57 (100.0%)  | 124 (100.0%)  |
|                                          | withdrawal of consent                    | 3 ( 4.5%)                               | 4 ( 7.0%)    | 7 ( 5.6%)     |
|                                          | protocol deviation                       | 4 ( 6.0%)                               | 6 ( 10.5%)   | 10 ( 8.1%)    |
|                                          | adverse event                            | 24 ( 35.8%)                             | 15 ( 26.3%)  | 39 ( 31.5%)   |
|                                          | death                                    | 0                                       | 1 ( 1.8%)    | 1 ( 0.8%)     |
|                                          | pat. lost, no further information avail. | 6 ( 9.0%)                               | 10 ( 17.5%)  | 16 ( 12.9%)   |
|                                          | pregnancy                                | 0                                       | 1 ( 1.8%)    | 1 ( 0.8%)     |
|                                          | other                                    | 30 ( 44.8%)                             | 20 ( 35.1%)  | 50 ( 40.3%)   |
|                                          | 25 < age <= 35                           | Study medication, administration status |              |               |
| n                                        |                                          | 608 (100.0%)                            | 628 (100.0%) | 1236 (100.0%) |
| study medication never administered      |                                          | 0                                       | 0            | 0             |
| completed                                |                                          | 531 ( 87.3%)                            | 90 ( 14.3%)  | 621 ( 50.2%)  |
| prematurely discontinued                 |                                          | 77 ( 12.7%)                             | 85 ( 13.5%)  | 162 ( 13.1%)  |
| ongoing                                  |                                          | 0                                       | 453 ( 72.1%) | 453 ( 36.7%)  |
| missing                                  |                                          | 0                                       | 0            | 0             |
| Premature EOSM or never taken, reason    |                                          |                                         |              |               |
| n                                        |                                          | 77 (100.0%)                             | 85 (100.0%)  | 162 (100.0%)  |
| withdrawal of consent                    |                                          | 3 ( 3.9%)                               | 4 ( 4.7%)    | 7 ( 4.3%)     |
| protocol deviation                       |                                          | 4 ( 5.2%)                               | 2 ( 2.4%)    | 6 ( 3.7%)     |
| adverse event                            |                                          | 29 ( 37.7%)                             | 29 ( 34.1%)  | 58 ( 35.8%)   |
| death                                    |                                          | 0                                       | 0            | 0             |
| pat. lost, no further information avail. |                                          | 9 ( 11.7%)                              | 9 ( 10.6%)   | 18 ( 11.1%)   |
| pregnancy                                |                                          | 1 ( 1.3%)                               | 4 ( 4.7%)    | 5 ( 3.1%)     |
| other                                    |                                          | 31 ( 40.3%)                             | 37 ( 43.5%)  | 68 ( 42.0%)   |

Note: Year is calculated using the formula year = (last day on study (imputed)- insertion date)/365

Bayer: /by-sasp/patdb/projects/de04209/310442/stat/test\_query06/pgms/t-ds3-2-parity-age.sas sgrpp 14JUL2015 13:51



Table /15: Number of subjects who prematurely discontinued the study medication (including main reason) after randomization by treatment, year and age group (all randomized subjects) (cont.)

## YEAR AFTER INSERTION: Overall

| Age category                             |                                          | LCS12                                   | LCS16        | Total         |
|------------------------------------------|------------------------------------------|-----------------------------------------|--------------|---------------|
| age <= 25                                | Study medication, administration status  |                                         |              |               |
|                                          | n                                        | 566 (100.0%)                            | 564 (100.0%) | 1130 (100.0%) |
|                                          | study medication never administered      | 0                                       | 1 ( 0.2%)    | 1 (<0.1%)     |
|                                          | completed                                | 288 ( 50.9%)                            | 73 ( 12.9%)  | 361 ( 31.9%)  |
|                                          | prematurely discontinued                 | 277 ( 48.9%)                            | 236 ( 41.8%) | 513 ( 45.4%)  |
|                                          | ongoing                                  | 0                                       | 254 ( 45.0%) | 254 ( 22.5%)  |
|                                          | missing                                  | 1 ( 0.2%)                               | 0            | 1 (<0.1%)     |
|                                          | Premature EOSM or never taken, reason    |                                         |              |               |
|                                          | n                                        | 278 (100.0%)                            | 237 (100.0%) | 515 (100.0%)  |
|                                          | withdrawal of consent                    | 8 ( 2.9%)                               | 15 ( 6.3%)   | 23 ( 4.5%)    |
|                                          | protocol deviation                       | 8 ( 2.9%)                               | 9 ( 3.8%)    | 17 ( 3.3%)    |
|                                          | adverse event                            | 142 ( 51.1%)                            | 113 ( 47.7%) | 255 ( 49.5%)  |
|                                          | death                                    | 0                                       | 1 ( 0.4%)    | 1 ( 0.2%)     |
|                                          | pat. lost, no further information avail. | 32 ( 11.5%)                             | 30 ( 12.7%)  | 62 ( 12.0%)   |
|                                          | pregnancy                                | 3 ( 1.1%)                               | 2 ( 0.8%)    | 5 ( 1.0%)     |
|                                          | other                                    | 85 ( 30.6%)                             | 67 ( 28.3%)  | 152 ( 29.5%)  |
|                                          | 25 < age <= 35                           | Study medication, administration status |              |               |
| n                                        |                                          | 866 (100.0%)                            | 889 (100.0%) | 1755 (100.0%) |
| study medication never administered      |                                          | 0                                       | 1 ( 0.1%)    | 1 (<0.1%)     |
| completed                                |                                          | 531 ( 61.3%)                            | 90 ( 10.1%)  | 621 ( 35.4%)  |
| prematurely discontinued                 |                                          | 335 ( 38.7%)                            | 345 ( 38.8%) | 680 ( 38.7%)  |
| ongoing                                  |                                          | 0                                       | 453 ( 51.0%) | 453 ( 25.8%)  |
| missing                                  |                                          | 0                                       | 0            | 0             |
| Premature EOSM or never taken, reason    |                                          |                                         |              |               |
| n                                        |                                          | 335 (100.0%)                            | 346 (100.0%) | 681 (100.0%)  |
| withdrawal of consent                    |                                          | 18 ( 5.4%)                              | 16 ( 4.6%)   | 34 ( 5.0%)    |
| protocol deviation                       |                                          | 8 ( 2.4%)                               | 7 ( 2.0%)    | 15 ( 2.2%)    |
| adverse event                            |                                          | 171 ( 51.0%)                            | 165 ( 47.7%) | 336 ( 49.3%)  |
| death                                    |                                          | 0                                       | 0            | 0             |
| pat. lost, no further information avail. |                                          | 31 ( 9.3%)                              | 31 ( 9.0%)   | 62 ( 9.1%)    |
| pregnancy                                |                                          | 6 ( 1.8%)                               | 8 ( 2.3%)    | 14 ( 2.1%)    |
| other                                    |                                          | 101 ( 30.1%)                            | 119 ( 34.4%) | 220 ( 32.3%)  |

Note: Year is calculated using the formula year = (last day on study (imputed)- insertion date)/365

Bayer: /by-sasp/patdb/projects/de04209/310442/stat/test\_query06/pgms/t-ds3-2-parity-age.sas sgrpp 14JUL2015 13:51

End of table

**Table /16: Reasons for premature discontinuation by parity - FAS**

| Parity          | n                                        | LCS12        | LCS16        | Total         |
|-----------------|------------------------------------------|--------------|--------------|---------------|
| 0 births        | n                                        | 556 (100.0%) | 574 (100.0%) | 1130 (100.0%) |
|                 | Study medication, administration status  |              |              |               |
|                 | missing                                  | 0            | 0            | 0             |
|                 | pat. lost, no further information avail. | 0            | 0            | 0             |
|                 | study medication never administered      | 0            | 0            | 0             |
|                 | other                                    | 0            | 0            | 0             |
|                 | completed                                | 302 ( 54.3%) | 72 ( 12.5%)  | 374 ( 33.1%)  |
|                 | prematurely discontinued                 | 254 ( 45.7%) | 240 ( 41.8%) | 494 ( 43.7%)  |
|                 | withdrawal of consent                    | 10 ( 1.8%)   | 12 ( 2.1%)   | 22 ( 1.9%)    |
|                 | protocol deviation                       | 5 ( 0.9%)    | 5 ( 0.9%)    | 10 ( 0.9%)    |
|                 | adverse event                            | 145 ( 26.1%) | 118 ( 20.6%) | 263 ( 23.3%)  |
|                 | death                                    | 0            | 1 ( 0.2%)    | 1 ( <0.1%)    |
|                 | pat. lost, no further information avail. | 11 ( 2.0%)   | 21 ( 3.7%)   | 32 ( 2.8%)    |
|                 | pregnancy                                | 4 ( 0.7%)    | 3 ( 0.5%)    | 7 ( 0.6%)     |
|                 | wish for pregnancy                       | 42 ( 7.6%)   | 45 ( 7.8%)   | 87 ( 7.7%)    |
|                 | other                                    | 37 ( 6.7%)   | 35 ( 6.1%)   | 72 ( 6.4%)    |
|                 | ongoing                                  | 0            | 262 ( 45.6%) | 262 ( 23.2%)  |
| 1 birth or more | n                                        | 876 (100.0%) | 878 (100.0%) | 1754 (100.0%) |
|                 | Study medication, administration status  |              |              |               |
|                 | missing                                  | 1 ( 0.1%)    | 0            | 1 ( <0.1%)    |
|                 | pat. lost, no further information avail. | 1 ( 0.1%)    | 0            | 1 ( <0.1%)    |
|                 | study medication never administered      | 0            | 1 ( 0.1%)    | 1 ( <0.1%)    |
|                 | other                                    | 0            | 1 ( 0.1%)    | 1 ( <0.1%)    |
|                 | completed                                | 517 ( 59.0%) | 91 ( 10.4%)  | 608 ( 34.7%)  |
|                 | prematurely discontinued                 | 358 ( 40.9%) | 341 ( 38.8%) | 699 ( 39.9%)  |
|                 | withdrawal of consent                    | 16 ( 1.8%)   | 19 ( 2.2%)   | 35 ( 2.0%)    |
|                 | protocol deviation                       | 11 ( 1.3%)   | 11 ( 1.3%)   | 22 ( 1.3%)    |
|                 | adverse event                            | 168 ( 19.2%) | 160 ( 18.2%) | 328 ( 18.7%)  |
|                 | death                                    | 0            | 0            | 0             |
|                 | pat. lost, no further information avail. | 51 ( 5.8%)   | 40 ( 4.6%)   | 91 ( 5.2%)    |
|                 | pregnancy                                | 5 ( 0.6%)    | 7 ( 0.8%)    | 12 ( 0.7%)    |
|                 | wish for pregnancy                       | 73 ( 8.3%)   | 73 ( 8.3%)   | 146 ( 8.3%)   |
|                 | other                                    | 34 ( 3.9%)   | 31 ( 3.5%)   | 65 ( 3.7%)    |
|                 | ongoing                                  | 0            | 445 ( 50.7%) | 445 ( 25.4%)  |

**Table /17: Reasons for premature discontinuation by age group - FAS**

| Age category   |                                          | LCS12        | LCS16        | Total         |
|----------------|------------------------------------------|--------------|--------------|---------------|
| age <= 25      | n                                        | 566 (100.0%) | 564 (100.0%) | 1130 (100.0%) |
|                | Study medication, administration status  |              |              |               |
|                | missing                                  | 1 ( 0.2%)    | 0            | 1 (<0.1%)     |
|                | pat. lost, no further information avail. | 1 ( 0.2%)    | 0            | 1 (<0.1%)     |
|                | study medication never administered      | 0            | 1 ( 0.2%)    | 1 (<0.1%)     |
|                | other                                    | 0            | 1 ( 0.2%)    | 1 (<0.1%)     |
|                | completed                                | 288 ( 50.9%) | 73 ( 12.9%)  | 361 ( 31.9%)  |
|                | prematurely discontinued                 | 277 ( 48.9%) | 236 ( 41.8%) | 513 ( 45.4%)  |
|                | withdrawal of consent                    | 8 ( 1.4%)    | 15 ( 2.7%)   | 23 ( 2.0%)    |
|                | protocol deviation                       | 8 ( 1.4%)    | 9 ( 1.6%)    | 17 ( 1.5%)    |
|                | adverse event                            | 142 ( 25.1%) | 113 ( 20.0%) | 255 ( 22.6%)  |
|                | death                                    | 0            | 1 ( 0.2%)    | 1 (<0.1%)     |
|                | pat. lost, no further information avail. | 31 ( 5.5%)   | 30 ( 5.3%)   | 61 ( 5.4%)    |
|                | pregnancy                                | 3 ( 0.5%)    | 2 ( 0.4%)    | 5 ( 0.4%)     |
|                | wish for pregnancy                       | 48 ( 8.5%)   | 39 ( 6.9%)   | 87 ( 7.7%)    |
|                | other                                    | 37 ( 6.5%)   | 27 ( 4.8%)   | 64 ( 5.7%)    |
|                | ongoing                                  | 0            | 254 ( 45.0%) | 254 ( 22.5%)  |
| 25 < age <= 35 | n                                        | 866 (100.0%) | 888 (100.0%) | 1754 (100.0%) |
|                | Study medication, administration status  |              |              |               |
|                | missing                                  | 0            | 0            | 0             |
|                | pat. lost, no further information avail. | 0            | 0            | 0             |
|                | study medication never administered      | 0            | 0            | 0             |
|                | other                                    | 0            | 0            | 0             |
|                | completed                                | 531 ( 61.3%) | 90 ( 10.1%)  | 621 ( 35.4%)  |
|                | prematurely discontinued                 | 335 ( 38.7%) | 345 ( 38.9%) | 680 ( 38.8%)  |
|                | withdrawal of consent                    | 18 ( 2.1%)   | 16 ( 1.8%)   | 34 ( 1.9%)    |
|                | protocol deviation                       | 8 ( 0.9%)    | 7 ( 0.8%)    | 15 ( 0.9%)    |
|                | adverse event                            | 171 ( 19.7%) | 165 ( 18.6%) | 336 ( 19.2%)  |
|                | death                                    | 0            | 0            | 0             |
|                | pat. lost, no further information avail. | 31 ( 3.6%)   | 31 ( 3.5%)   | 62 ( 3.5%)    |
|                | pregnancy                                | 6 ( 0.7%)    | 8 ( 0.9%)    | 14 ( 0.8%)    |
|                | wish for pregnancy                       | 67 ( 7.7%)   | 79 ( 8.9%)   | 146 ( 8.3%)   |
|                | other                                    | 34 ( 3.9%)   | 39 ( 4.4%)   | 73 ( 4.2%)    |
|                | ongoing                                  | 0            | 453 ( 51.0%) | 453 ( 25.8%)  |

**Table /18: Reason for discontinuation of study medication due to withdrawal of consent or AE by treatment and parity status (FAS)**

| Parity          |                                                    | LCS12         | LCS16         | Total         |
|-----------------|----------------------------------------------------|---------------|---------------|---------------|
| 0 births        | n                                                  | 556 (100.0%)  | 574 (100.0%)  | 1130 (100.0%) |
|                 | SM discontinued due to withdrawal of consent or AE |               |               |               |
|                 | no                                                 | 401 ( 72.1%)  | 444 ( 77.4%)  | 845 ( 74.8%)  |
|                 | yes                                                | 155 ( 27.9%)  | 130 ( 22.6%)  | 285 ( 25.2%)  |
|                 | missing                                            | 2 ( 0.4%)     | 1 ( 0.2%)     | 3 ( 0.3%)     |
|                 | progestin-related side effect                      | 21 ( 3.8%)    | 20 ( 3.5%)    | 41 ( 3.6%)    |
|                 | bleeding/non bleeding problem                      | 29 ( 5.2%)    | 32 ( 5.6%)    | 61 ( 5.4%)    |
|                 | UNK                                                | 5 ( 0.9%)     | 5 ( 0.9%)     | 10 ( 0.9%)    |
|                 | other                                              | 98 ( 17.6%)   | 72 ( 12.5%)   | 170 ( 15.0%)  |
| 1 birth or more | n                                                  | 876 (100.0%)  | 878 (100.0%)  | 1754 (100.0%) |
|                 | SM discontinued due to withdrawal of consent or AE |               |               |               |
|                 | no                                                 | 692 ( 79.0%)  | 699 ( 79.6%)  | 1391 ( 79.3%) |
|                 | yes                                                | 184 ( 21.0%)  | 179 ( 20.4%)  | 363 ( 20.7%)  |
|                 | missing                                            | 4 ( 0.5%)     | 2 ( 0.2%)     | 6 ( 0.3%)     |
|                 | progestin-related side effect                      | 27 ( 3.1%)    | 20 ( 2.3%)    | 47 ( 2.7%)    |
|                 | bleeding/non bleeding problem                      | 39 ( 4.5%)    | 39 ( 4.4%)    | 78 ( 4.4%)    |
|                 | UNK                                                | 9 ( 1.0%)     | 11 ( 1.3%)    | 20 ( 1.1%)    |
|                 | other                                              | 105 ( 12.0%)  | 107 ( 12.2%)  | 212 ( 12.1%)  |
| total           | n                                                  | 1432 (100.0%) | 1452 (100.0%) | 2884 (100.0%) |
|                 | SM discontinued due to withdrawal of consent or AE |               |               |               |
|                 | no                                                 | 1093 ( 76.3%) | 1143 ( 78.7%) | 2236 ( 77.5%) |
|                 | yes                                                | 339 ( 23.7%)  | 309 ( 21.3%)  | 648 ( 22.5%)  |
|                 | missing                                            | 6 ( 0.4%)     | 3 ( 0.2%)     | 9 ( 0.3%)     |
|                 | progestin-related side effect                      | 48 ( 3.4%)    | 40 ( 2.8%)    | 88 ( 3.1%)    |
|                 | bleeding/non bleeding problem                      | 68 ( 4.7%)    | 71 ( 4.9%)    | 139 ( 4.8%)   |
|                 | UNK                                                | 14 ( 1.0%)    | 16 ( 1.1%)    | 30 ( 1.0%)    |
|                 | other                                              | 203 ( 14.2%)  | 179 ( 12.3%)  | 382 ( 13.2%)  |

Note: SM = Study medication

Bayer: /by-sasp/patdb/projects/de04209/310442/stat/test\_query06/pgms/t-ds3-3-parity-age.sas sgrpp 14JUL2015 13:51

End of table

**Table /19: Reason for discontinuation of study medication due to withdrawal of consent or AE by treatment and age group (FAS)**

| Age category   |                                                    | LCS12         | LCS16         | Total         |
|----------------|----------------------------------------------------|---------------|---------------|---------------|
| age <= 25      | n                                                  | 1132 (100.0%) | 1128 (100.0%) | 2260 (100.0%) |
|                | SM discontinued due to withdrawal of consent or AE |               |               |               |
|                | no                                                 | 832 ( 73.5%)  | 872 ( 77.3%)  | 1704 ( 75.4%) |
|                | yes                                                | 300 ( 26.5%)  | 256 ( 22.7%)  | 556 ( 24.6%)  |
|                | missing                                            | 6 ( 0.5%)     | 4 ( 0.4%)     | 10 ( 0.4%)    |
|                | progestin-related side effect                      | 38 ( 3.4%)    | 36 ( 3.2%)    | 74 ( 3.3%)    |
|                | bleeding/non bleeding problem                      | 38 ( 3.4%)    | 50 ( 4.4%)    | 88 ( 3.9%)    |
|                | UNK                                                | 10 ( 0.9%)    | 14 ( 1.2%)    | 24 ( 1.1%)    |
|                | other                                              | 208 ( 18.4%)  | 152 ( 13.5%)  | 360 ( 15.9%)  |
| 25 < age <= 35 | n                                                  | 1732 (100.0%) | 1776 (100.0%) | 3508 (100.0%) |
|                | SM discontinued due to withdrawal of consent or AE |               |               |               |
|                | no                                                 | 1354 ( 78.2%) | 1414 ( 79.6%) | 2768 ( 78.9%) |
|                | yes                                                | 378 ( 21.8%)  | 362 ( 20.4%)  | 740 ( 21.1%)  |
|                | missing                                            | 6 ( 0.3%)     | 2 ( 0.1%)     | 8 ( 0.2%)     |
|                | progestin-related side effect                      | 58 ( 3.3%)    | 44 ( 2.5%)    | 102 ( 2.9%)   |
|                | bleeding/non bleeding problem                      | 98 ( 5.7%)    | 92 ( 5.2%)    | 190 ( 5.4%)   |
|                | UNK                                                | 18 ( 1.0%)    | 18 ( 1.0%)    | 36 ( 1.0%)    |
|                | other                                              | 198 ( 11.4%)  | 206 ( 11.6%)  | 404 ( 11.5%)  |

Note: SM = Study medication

Bayer: /by-sasp/patdb/projects/de04209/310442/stat/test\_query06/pgms/t-ds3-3-parity-age.sas sgrpp 14JUL2015 13:51

End of table

**Table /20: User satisfaction questionnaire by parity (FAS)**

Parity: 0 births

| Volunteer satisf. questionn., questions | Volunteer satisfaction questionnaire | LCS12        | LCS16        | Total        |
|-----------------------------------------|--------------------------------------|--------------|--------------|--------------|
| study treat, overall satisfaction       | n                                    | 397 (100.0%) | 405 (100.0%) | 802 (100.0%) |
|                                         | very satisfied                       | 283 ( 71.3%) | 305 ( 75.3%) | 588 ( 73.3%) |
|                                         | somewhat satisfied                   | 91 ( 22.9%)  | 83 ( 20.5%)  | 174 ( 21.7%) |
|                                         | neither satisfied / dissatisfied     | 13 ( 3.3%)   | 6 ( 1.5%)    | 19 ( 2.4%)   |
|                                         | dissatisfied                         | 9 ( 2.3%)    | 9 ( 2.2%)    | 18 ( 2.2%)   |
|                                         | very dissatisfied                    | 1 ( 0.3%)    | 2 ( 0.5%)    | 3 ( 0.4%)    |
| change of regimen, likelihood           | n                                    | 397 (100.0%) | 405 (100.0%) | 802 (100.0%) |
|                                         | missing                              | 1 ( 0.3%)    | 0            | 1 ( 0.1%)    |
|                                         | continue with LCS                    | 291 ( 73.3%) | 323 ( 79.8%) | 614 ( 76.6%) |
|                                         | use a different horm. contr.         | 44 ( 11.1%)  | 24 ( 5.9%)   | 68 ( 8.5%)   |
|                                         | use a different contr. meth.         | 30 ( 7.6%)   | 25 ( 6.2%)   | 55 ( 6.9%)   |
|                                         | discontinue use of all types of c    | 13 ( 3.3%)   | 14 ( 3.5%)   | 27 ( 3.4%)   |
|                                         | don't know                           | 18 ( 4.5%)   | 19 ( 4.7%)   | 37 ( 4.6%)   |
| menstrual bleeding, comparison          | n                                    | 397 (100.0%) | 405 (100.0%) | 802 (100.0%) |
|                                         | missing                              | 1 ( 0.3%)    | 0            | 1 ( 0.1%)    |
|                                         | decreased                            | 338 ( 85.1%) | 374 ( 92.3%) | 712 ( 88.8%) |
|                                         | no change                            | 36 ( 9.1%)   | 17 ( 4.2%)   | 53 ( 6.6%)   |
|                                         | increased                            | 22 ( 5.5%)   | 14 ( 3.5%)   | 36 ( 4.5%)   |
| menstrual bleeding pattern              | n                                    | 397 (100.0%) | 405 (100.0%) | 802 (100.0%) |
|                                         | missing                              | 0            | 2 ( 0.5%)    | 2 ( 0.2%)    |
|                                         | very satisfied                       | 165 ( 41.6%) | 183 ( 45.2%) | 348 ( 43.4%) |
|                                         | somewhat satisfied                   | 124 ( 31.2%) | 106 ( 26.2%) | 230 ( 28.7%) |
|                                         | neither satisfied / dissatisfied     | 52 ( 13.1%)  | 36 ( 8.9%)   | 88 ( 11.0%)  |
|                                         | dissatisfied                         | 30 ( 7.6%)   | 26 ( 6.4%)   | 56 ( 7.0%)   |
|                                         | very dissatisfied                    | 8 ( 2.0%)    | 6 ( 1.5%)    | 14 ( 1.7%)   |
|                                         | not applicable                       | 18 ( 4.5%)   | 46 ( 11.4%)  | 64 ( 8.0%)   |

**Table /20: User satisfaction questionnaire by parity (FAS)**

Parity: 0 births

| Volunteer satisf. questionn., questions | Volunteer satisfaction questionnaire | LCS12        | LCS16        | Total        |
|-----------------------------------------|--------------------------------------|--------------|--------------|--------------|
| menstrual bleeding, unexpected          | n                                    | 397 (100.0%) | 405 (100.0%) | 802 (100.0%) |
|                                         | missing                              | 1 ( 0.3%)    | 0            | 1 ( 0.1%)    |
|                                         | never                                | 118 ( 29.7%) | 111 ( 27.4%) | 229 ( 28.6%) |
|                                         | seldom                               | 237 ( 59.7%) | 254 ( 62.7%) | 491 ( 61.2%) |
|                                         | often                                | 35 ( 8.8%)   | 33 ( 8.1%)   | 68 ( 8.5%)   |
|                                         | very often                           | 6 ( 1.5%)    | 7 ( 1.7%)    | 13 ( 1.6%)   |
| menstrual bleeding, absence             | n                                    | 397 (100.0%) | 405 (100.0%) | 802 (100.0%) |
|                                         | missing                              | 362 ( 91.2%) | 311 ( 76.8%) | 673 ( 83.9%) |
|                                         | very satisfied                       | 29 ( 7.3%)   | 79 ( 19.5%)  | 108 ( 13.5%) |
|                                         | somewhat satisfied                   | 5 ( 1.3%)    | 11 ( 2.7%)   | 16 ( 2.0%)   |
|                                         | neither satisfied / dissatisfied     | 0            | 4 ( 1.0%)    | 4 ( 0.5%)    |
|                                         | dissatisfied                         | 1 ( 0.3%)    | 0            | 1 ( 0.1%)    |
| menstrual pain, treatment               | n                                    | 397 (100.0%) | 405 (100.0%) | 802 (100.0%) |
|                                         | none                                 | 92 ( 23.2%)  | 116 ( 28.6%) | 208 ( 25.9%) |
|                                         | mild                                 | 194 ( 48.9%) | 199 ( 49.1%) | 393 ( 49.0%) |
|                                         | moderate                             | 90 ( 22.7%)  | 79 ( 19.5%)  | 169 ( 21.1%) |
|                                         | severe                               | 21 ( 5.3%)   | 11 ( 2.7%)   | 32 ( 4.0%)   |
| menstrual pain, comparison              | n                                    | 397 (100.0%) | 405 (100.0%) | 802 (100.0%) |
|                                         | missing                              | 43 ( 10.8%)  | 25 ( 6.2%)   | 68 ( 8.5%)   |
|                                         | decreased                            | 197 ( 49.6%) | 251 ( 62.0%) | 448 ( 55.9%) |
|                                         | no change                            | 71 ( 17.9%)  | 81 ( 20.0%)  | 152 ( 19.0%) |
|                                         | increased                            | 86 ( 21.7%)  | 48 ( 11.9%)  | 134 ( 16.7%) |

Note: Only collected after Amendment 3 to study protocol

Bayer: /by-sasp/patdb/projects/de04209/310442/stat/test\_query06/pgms/t-usq.sas sgrpp 14JUL2015 13:52

Table /20: User satisfaction questionnaire by parity (FAS) (cont.)

Parity: 1 birth or more

| Volunteer satisf. questionn., questions | Volunteer satisfaction questionnaire | LCS12        | LCS16        | Total         |
|-----------------------------------------|--------------------------------------|--------------|--------------|---------------|
| study treat, overall satisfaction       | n                                    | 656 (100.0%) | 658 (100.0%) | 1314 (100.0%) |
|                                         | missing                              | 1 ( 0.2%)    | 1 ( 0.2%)    | 2 ( 0.2%)     |
|                                         | very satisfied                       | 513 ( 78.2%) | 537 ( 81.6%) | 1050 ( 79.9%) |
|                                         | somewhat satisfied                   | 110 ( 16.8%) | 94 ( 14.3%)  | 204 ( 15.5%)  |
|                                         | neither satisfied / dissatisfied     | 18 ( 2.7%)   | 16 ( 2.4%)   | 34 ( 2.6%)    |
|                                         | dissatisfied                         | 14 ( 2.1%)   | 9 ( 1.4%)    | 23 ( 1.8%)    |
|                                         | very dissatisfied                    | 0            | 1 ( 0.2%)    | 1 ( <0.1%)    |
| change of regimen, likelihood           | n                                    | 656 (100.0%) | 658 (100.0%) | 1314 (100.0%) |
|                                         | missing                              | 1 ( 0.2%)    | 1 ( 0.2%)    | 2 ( 0.2%)     |
|                                         | continue with LCS                    | 520 ( 79.3%) | 549 ( 83.4%) | 1069 ( 81.4%) |
|                                         | use a different horm. contr.         | 42 ( 6.4%)   | 21 ( 3.2%)   | 63 ( 4.8%)    |
|                                         | use a different contr. meth.         | 49 ( 7.5%)   | 43 ( 6.5%)   | 92 ( 7.0%)    |
|                                         | discontinue use of all types of c    | 15 ( 2.3%)   | 13 ( 2.0%)   | 28 ( 2.1%)    |
|                                         | don't know                           | 29 ( 4.4%)   | 31 ( 4.7%)   | 60 ( 4.6%)    |
| menstrual bleeding, comparison          | n                                    | 656 (100.0%) | 658 (100.0%) | 1314 (100.0%) |
|                                         | missing                              | 1 ( 0.2%)    | 1 ( 0.2%)    | 2 ( 0.2%)     |
|                                         | decreased                            | 575 ( 87.7%) | 611 ( 92.9%) | 1186 ( 90.3%) |
|                                         | no change                            | 49 ( 7.5%)   | 31 ( 4.7%)   | 80 ( 6.1%)    |
|                                         | increased                            | 31 ( 4.7%)   | 15 ( 2.3%)   | 46 ( 3.5%)    |
| menstrual bleeding pattern              | n                                    | 656 (100.0%) | 658 (100.0%) | 1314 (100.0%) |
|                                         | missing                              | 2 ( 0.3%)    | 3 ( 0.5%)    | 5 ( 0.4%)     |
|                                         | very satisfied                       | 349 ( 53.2%) | 354 ( 53.8%) | 703 ( 53.5%)  |
|                                         | somewhat satisfied                   | 169 ( 25.8%) | 166 ( 25.2%) | 335 ( 25.5%)  |
|                                         | neither satisfied / dissatisfied     | 48 ( 7.3%)   | 41 ( 6.2%)   | 89 ( 6.8%)    |
|                                         | dissatisfied                         | 36 ( 5.5%)   | 33 ( 5.0%)   | 69 ( 5.3%)    |
|                                         | very dissatisfied                    | 12 ( 1.8%)   | 7 ( 1.1%)    | 19 ( 1.4%)    |
|                                         | not applicable                       | 40 ( 6.1%)   | 54 ( 8.2%)   | 94 ( 7.2%)    |



Table /20: User satisfaction questionnaire by parity (FAS) (cont.)

Parity: 1 birth or more

| Volunteer satisf. questionn., questions | Volunteer satisfaction questionnaire | LCS12        | LCS16        | Total         |
|-----------------------------------------|--------------------------------------|--------------|--------------|---------------|
| menstrual bleeding, unexpected          | n                                    | 656 (100.0%) | 658 (100.0%) | 1314 (100.0%) |
|                                         | missing                              | 2 ( 0.3%)    | 1 ( 0.2%)    | 3 ( 0.2%)     |
|                                         | never                                | 224 ( 34.1%) | 216 ( 32.8%) | 440 ( 33.5%)  |
|                                         | seldom                               | 352 ( 53.7%) | 380 ( 57.8%) | 732 ( 55.7%)  |
|                                         | often                                | 63 ( 9.6%)   | 46 ( 7.0%)   | 109 ( 8.3%)   |
|                                         | very often                           | 15 ( 2.3%)   | 15 ( 2.3%)   | 30 ( 2.3%)    |
| menstrual bleeding, absence             | n                                    | 656 (100.0%) | 658 (100.0%) | 1314 (100.0%) |
|                                         | missing                              | 556 ( 84.8%) | 522 ( 79.3%) | 1078 ( 82.0%) |
|                                         | very satisfied                       | 86 ( 13.1%)  | 110 ( 16.7%) | 196 ( 14.9%)  |
|                                         | somewhat satisfied                   | 7 ( 1.1%)    | 15 ( 2.3%)   | 22 ( 1.7%)    |
|                                         | neither satisfied / dissatisfied     | 6 ( 0.9%)    | 7 ( 1.1%)    | 13 ( 1.0%)    |
|                                         | dissatisfied                         | 1 ( 0.2%)    | 4 ( 0.6%)    | 5 ( 0.4%)     |
| menstrual pain, treatment               | n                                    | 656 (100.0%) | 658 (100.0%) | 1314 (100.0%) |
|                                         | missing                              | 3 ( 0.5%)    | 1 ( 0.2%)    | 4 ( 0.3%)     |
|                                         | none                                 | 333 ( 50.8%) | 332 ( 50.5%) | 665 ( 50.6%)  |
|                                         | mild                                 | 275 ( 41.9%) | 281 ( 42.7%) | 556 ( 42.3%)  |
|                                         | moderate                             | 40 ( 6.1%)   | 40 ( 6.1%)   | 80 ( 6.1%)    |
|                                         | severe                               | 5 ( 0.8%)    | 4 ( 0.6%)    | 9 ( 0.7%)     |
| menstrual pain, comparison              | n                                    | 656 (100.0%) | 658 (100.0%) | 1314 (100.0%) |
|                                         | missing                              | 96 ( 14.6%)  | 89 ( 13.5%)  | 185 ( 14.1%)  |
|                                         | decreased                            | 405 ( 61.7%) | 430 ( 65.3%) | 835 ( 63.5%)  |
|                                         | no change                            | 124 ( 18.9%) | 116 ( 17.6%) | 240 ( 18.3%)  |
|                                         | increased                            | 31 ( 4.7%)   | 23 ( 3.5%)   | 54 ( 4.1%)    |

Note: Only collected after Amendment 3 to study protocol

Bayer: /by-sasp/patdb/projects/de04209/310442/stat/test\_query06/pgms/t-usq.sas sgrpp 14JUL2015 13:52

End of table

**Table /21: User satisfaction questionnaire by age group (FAS)**

Age category: age &lt;= 25

| Volunteer satisf. questionn., questions | Volunteer satisfaction questionnaire | LCS12        | LCS16        | Total        |
|-----------------------------------------|--------------------------------------|--------------|--------------|--------------|
| study treat, overall satisfaction       | n                                    | 388 (100.0%) | 396 (100.0%) | 784 (100.0%) |
|                                         | missing                              | 0            | 1 ( 0.3%)    | 1 ( 0.1%)    |
|                                         | very satisfied                       | 295 ( 76.0%) | 313 ( 79.0%) | 608 ( 77.6%) |
|                                         | somewhat satisfied                   | 79 ( 20.4%)  | 69 ( 17.4%)  | 148 ( 18.9%) |
|                                         | neither satisfied / dissatisfied     | 9 ( 2.3%)    | 8 ( 2.0%)    | 17 ( 2.2%)   |
|                                         | dissatisfied                         | 5 ( 1.3%)    | 5 ( 1.3%)    | 10 ( 1.3%)   |
| change of regimen, likelihood           | n                                    | 388 (100.0%) | 396 (100.0%) | 784 (100.0%) |
|                                         | missing                              | 1 ( 0.3%)    | 1 ( 0.3%)    | 2 ( 0.3%)    |
|                                         | continue with LCS                    | 289 ( 74.5%) | 311 ( 78.5%) | 600 ( 76.5%) |
|                                         | use a different horm. contr.         | 33 ( 8.5%)   | 22 ( 5.6%)   | 55 ( 7.0%)   |
|                                         | use a different contr. meth.         | 35 ( 9.0%)   | 31 ( 7.8%)   | 66 ( 8.4%)   |
|                                         | discontinue use of all types of c    | 13 ( 3.4%)   | 9 ( 2.3%)    | 22 ( 2.8%)   |
|                                         | don't know                           | 17 ( 4.4%)   | 22 ( 5.6%)   | 39 ( 5.0%)   |
| menstrual bleeding, comparison          | n                                    | 388 (100.0%) | 396 (100.0%) | 784 (100.0%) |
|                                         | missing                              | 1 ( 0.3%)    | 1 ( 0.3%)    | 2 ( 0.3%)    |
|                                         | decreased                            | 327 ( 84.3%) | 365 ( 92.2%) | 692 ( 88.3%) |
|                                         | no change                            | 39 ( 10.1%)  | 17 ( 4.3%)   | 56 ( 7.1%)   |
|                                         | increased                            | 21 ( 5.4%)   | 13 ( 3.3%)   | 34 ( 4.3%)   |
| menstrual bleeding pattern              | n                                    | 388 (100.0%) | 396 (100.0%) | 784 (100.0%) |
|                                         | missing                              | 0            | 3 ( 0.8%)    | 3 ( 0.4%)    |
|                                         | very satisfied                       | 183 ( 47.2%) | 194 ( 49.0%) | 377 ( 48.1%) |
|                                         | somewhat satisfied                   | 105 ( 27.1%) | 107 ( 27.0%) | 212 ( 27.0%) |
|                                         | neither satisfied / dissatisfied     | 49 ( 12.6%)  | 35 ( 8.8%)   | 84 ( 10.7%)  |
|                                         | dissatisfied                         | 27 ( 7.0%)   | 19 ( 4.8%)   | 46 ( 5.9%)   |
|                                         | very dissatisfied                    | 6 ( 1.5%)    | 4 ( 1.0%)    | 10 ( 1.3%)   |
|                                         | not applicable                       | 18 ( 4.6%)   | 34 ( 8.6%)   | 52 ( 6.6%)   |

**Table /21: User satisfaction questionnaire by age group (FAS)**

Age category: age &lt;= 25

| Volunteer satisf. questionn., questions | Volunteer satisfaction questionnaire | LCS12        | LCS16        | Total        |
|-----------------------------------------|--------------------------------------|--------------|--------------|--------------|
| menstrual bleeding, unexpected          | n                                    | 388 (100.0%) | 396 (100.0%) | 784 (100.0%) |
|                                         | missing                              | 1 ( 0.3%)    | 1 ( 0.3%)    | 2 ( 0.3%)    |
|                                         | never                                | 115 ( 29.6%) | 104 ( 26.3%) | 219 ( 27.9%) |
|                                         | seldom                               | 233 ( 60.1%) | 253 ( 63.9%) | 486 ( 62.0%) |
|                                         | often                                | 34 ( 8.8%)   | 29 ( 7.3%)   | 63 ( 8.0%)   |
|                                         | very often                           | 5 ( 1.3%)    | 9 ( 2.3%)    | 14 ( 1.8%)   |
| menstrual bleeding, absence             | n                                    | 388 (100.0%) | 396 (100.0%) | 784 (100.0%) |
|                                         | missing                              | 345 ( 88.9%) | 323 ( 81.6%) | 668 ( 85.2%) |
|                                         | very satisfied                       | 36 ( 9.3%)   | 61 ( 15.4%)  | 97 ( 12.4%)  |
|                                         | somewhat satisfied                   | 3 ( 0.8%)    | 7 ( 1.8%)    | 10 ( 1.3%)   |
|                                         | neither satisfied / dissatisfied     | 4 ( 1.0%)    | 5 ( 1.3%)    | 9 ( 1.1%)    |
| menstrual pain, treatment               | n                                    | 388 (100.0%) | 396 (100.0%) | 784 (100.0%) |
|                                         | missing                              | 1 ( 0.3%)    | 1 ( 0.3%)    | 2 ( 0.3%)    |
|                                         | none                                 | 113 ( 29.1%) | 127 ( 32.1%) | 240 ( 30.6%) |
|                                         | mild                                 | 181 ( 46.6%) | 198 ( 50.0%) | 379 ( 48.3%) |
|                                         | moderate                             | 78 ( 20.1%)  | 61 ( 15.4%)  | 139 ( 17.7%) |
|                                         | severe                               | 15 ( 3.9%)   | 9 ( 2.3%)    | 24 ( 3.1%)   |
| menstrual pain, comparison              | n                                    | 388 (100.0%) | 396 (100.0%) | 784 (100.0%) |
|                                         | missing                              | 48 ( 12.4%)  | 34 ( 8.6%)   | 82 ( 10.5%)  |
|                                         | decreased                            | 194 ( 50.0%) | 244 ( 61.6%) | 438 ( 55.9%) |
|                                         | no change                            | 82 ( 21.1%)  | 78 ( 19.7%)  | 160 ( 20.4%) |
|                                         | increased                            | 64 ( 16.5%)  | 40 ( 10.1%)  | 104 ( 13.3%) |

Note: Only collected after Amendment 3 to study protocol

Bayer: /by-sasp/patdb/projects/de04209/310442/stat/test\_query06/pgms/t-usq.sas sgrpp 14JUL2015 13:52

Table /21: User satisfaction questionnaire by age group (FAS) (cont.)

Age category: 25 &lt; age &lt;= 35

| Volunteer satisf. questionn., questions | Volunteer satisfaction questionnaire | LCS12        | LCS16        | Total         |
|-----------------------------------------|--------------------------------------|--------------|--------------|---------------|
| study treat, overall satisfaction       | n                                    | 665 (100.0%) | 667 (100.0%) | 1332 (100.0%) |
|                                         | missing                              | 1 ( 0.2%)    | 0            | 1 (<0.1%)     |
|                                         | very satisfied                       | 501 ( 75.3%) | 529 ( 79.3%) | 1030 ( 77.3%) |
|                                         | somewhat satisfied                   | 122 ( 18.3%) | 108 ( 16.2%) | 230 ( 17.3%)  |
|                                         | neither satisfied / dissatisfied     | 22 ( 3.3%)   | 14 ( 2.1%)   | 36 ( 2.7%)    |
|                                         | dissatisfied                         | 18 ( 2.7%)   | 13 ( 1.9%)   | 31 ( 2.3%)    |
|                                         | very dissatisfied                    | 1 ( 0.2%)    | 3 ( 0.4%)    | 4 ( 0.3%)     |
|                                         | change of regimen, likelihood        | n            | 665 (100.0%) | 667 (100.0%)  |
| missing                                 |                                      | 1 ( 0.2%)    | 0            | 1 (<0.1%)     |
| continue with LCS                       |                                      | 522 ( 78.5%) | 561 ( 84.1%) | 1083 ( 81.3%) |
| use a different horm. contr.            |                                      | 53 ( 8.0%)   | 23 ( 3.4%)   | 76 ( 5.7%)    |
| use a different contr. meth.            |                                      | 44 ( 6.6%)   | 37 ( 5.5%)   | 81 ( 6.1%)    |
| discontinue use of all types of c       |                                      | 15 ( 2.3%)   | 18 ( 2.7%)   | 33 ( 2.5%)    |
| don't know                              |                                      | 30 ( 4.5%)   | 28 ( 4.2%)   | 58 ( 4.4%)    |
| menstrual bleeding, comparison          |                                      | n            | 665 (100.0%) | 667 (100.0%)  |
|                                         | missing                              | 1 ( 0.2%)    | 0            | 1 (<0.1%)     |
|                                         | decreased                            | 586 ( 88.1%) | 620 ( 93.0%) | 1206 ( 90.5%) |
|                                         | no change                            | 46 ( 6.9%)   | 31 ( 4.6%)   | 77 ( 5.8%)    |
|                                         | increased                            | 32 ( 4.8%)   | 16 ( 2.4%)   | 48 ( 3.6%)    |
| menstrual bleeding pattern              | n                                    | 665 (100.0%) | 667 (100.0%) | 1332 (100.0%) |
|                                         | missing                              | 2 ( 0.3%)    | 2 ( 0.3%)    | 4 ( 0.3%)     |
|                                         | very satisfied                       | 331 ( 49.8%) | 343 ( 51.4%) | 674 ( 50.6%)  |
|                                         | somewhat satisfied                   | 188 ( 28.3%) | 165 ( 24.7%) | 353 ( 26.5%)  |
|                                         | neither satisfied / dissatisfied     | 51 ( 7.7%)   | 42 ( 6.3%)   | 93 ( 7.0%)    |
|                                         | dissatisfied                         | 39 ( 5.9%)   | 40 ( 6.0%)   | 79 ( 5.9%)    |
|                                         | very dissatisfied                    | 14 ( 2.1%)   | 9 ( 1.3%)    | 23 ( 1.7%)    |
|                                         | not applicable                       | 40 ( 6.0%)   | 66 ( 9.9%)   | 106 ( 8.0%)   |

Table /21: User satisfaction questionnaire by age group (FAS) (cont.)

Age category: 25 &lt; age &lt;= 35

| Volunteer satisf. questionn., questions | Volunteer satisfaction questionnaire | LCS12        | LCS16        | Total         |
|-----------------------------------------|--------------------------------------|--------------|--------------|---------------|
| menstrual bleeding, unexpected          | n                                    | 665 (100.0%) | 667 (100.0%) | 1332 (100.0%) |
|                                         | missing                              | 2 ( 0.3%)    | 0            | 2 ( 0.2%)     |
|                                         | never                                | 227 ( 34.1%) | 223 ( 33.4%) | 450 ( 33.8%)  |
|                                         | seldom                               | 356 ( 53.5%) | 381 ( 57.1%) | 737 ( 55.3%)  |
|                                         | often                                | 64 ( 9.6%)   | 50 ( 7.5%)   | 114 ( 8.6%)   |
|                                         | very often                           | 16 ( 2.4%)   | 13 ( 1.9%)   | 29 ( 2.2%)    |
| menstrual bleeding, absence             | n                                    | 665 (100.0%) | 667 (100.0%) | 1332 (100.0%) |
|                                         | missing                              | 573 ( 86.2%) | 510 ( 76.5%) | 1083 ( 81.3%) |
|                                         | very satisfied                       | 79 ( 11.9%)  | 128 ( 19.2%) | 207 ( 15.5%)  |
|                                         | somewhat satisfied                   | 9 ( 1.4%)    | 19 ( 2.8%)   | 28 ( 2.1%)    |
|                                         | neither satisfied / dissatisfied     | 2 ( 0.3%)    | 6 ( 0.9%)    | 8 ( 0.6%)     |
|                                         | dissatisfied                         | 2 ( 0.3%)    | 4 ( 0.6%)    | 6 ( 0.5%)     |
| menstrual pain, treatment               | n                                    | 665 (100.0%) | 667 (100.0%) | 1332 (100.0%) |
|                                         | missing                              | 2 ( 0.3%)    | 0            | 2 ( 0.2%)     |
|                                         | none                                 | 312 ( 46.9%) | 321 ( 48.1%) | 633 ( 47.5%)  |
|                                         | mild                                 | 288 ( 43.3%) | 282 ( 42.3%) | 570 ( 42.8%)  |
|                                         | moderate                             | 52 ( 7.8%)   | 58 ( 8.7%)   | 110 ( 8.3%)   |
|                                         | severe                               | 11 ( 1.7%)   | 6 ( 0.9%)    | 17 ( 1.3%)    |
| menstrual pain, comparison              | n                                    | 665 (100.0%) | 667 (100.0%) | 1332 (100.0%) |
|                                         | missing                              | 91 ( 13.7%)  | 80 ( 12.0%)  | 171 ( 12.8%)  |
|                                         | decreased                            | 408 ( 61.4%) | 437 ( 65.5%) | 845 ( 63.4%)  |
|                                         | no change                            | 113 ( 17.0%) | 119 ( 17.8%) | 232 ( 17.4%)  |
|                                         | increased                            | 53 ( 8.0%)   | 31 ( 4.6%)   | 84 ( 6.3%)    |

Note: Only collected after Amendment 3 to study protocol

Bayer: /by-sasp/patdb/projects/de04209/310442/stat/test\_query06/pgms/t-usq.sas sgrpp 14JUL2015 13:52

End of table
